# Supplementary material for: Genome-Wide Analysis of Long Noncoding RNAs and Their Responses to Drought Stress in Cotton (Gossypium hirsutum L.)
Source: PubMed Central journal article supplement (PMC4905672; doi:10.1371/journal.pone.0156723), 2016-06-13
Supplement: pone.0156723.s003.pdf [file pone.0156723.s003.pdf]

### S1 Table Annotation of novel isoforms

|         |           |      |         |         |   |   |   |         |                              |                             |                |   |
|---------|-----------|------|---------|---------|---|---|---|---------|------------------------------|-----------------------------|----------------|---|
| At_chr1 | Cufflinks | exon | 150469  | 151207  | . | + | . | gene_id | "XLOC_000019"; transcript_id | "Novel_000001"; exon_number | "1"; gene_type | " |
| At_chr1 | Cufflinks | exon | 155018  | 155265  | . | + | . | gene_id | "XLOC_000019"; transcript_id | "Novel_000001"; exon_number | "2"; gene_type | " |
| At_chr1 | Cufflinks | exon | 250659  | 251335  | . | + | . | gene_id | "XLOC_000068"; transcript_id | "Novel_000002"; exon_number | "1"; gene_type | " |
| At_chr1 | Cufflinks | exon | 252436  | 252512  | . | + | . | gene_id | "XLOC_000068"; transcript_id | "Novel_000002"; exon_number | "2"; gene_type | " |
| At_chr1 | Cufflinks | exon | 252626  | 252866  | . | + | . | gene_id | "XLOC_000068"; transcript_id | "Novel_000002"; exon_number | "3"; gene_type | " |
| At_chr1 | Cufflinks | exon | 252951  | 253530  | . | + | . | gene_id | "XLOC_000068"; transcript_id | "Novel_000002"; exon_number | "4"; gene_type | " |
| At_chr1 | Cufflinks | exon | 250763  | 251335  | . | + | . | gene_id | "XLOC_000068"; transcript_id | "Novel_000003"; exon_number | "1"; gene_type | " |
| At_chr1 | Cufflinks | exon | 252436  | 252512  | . | + | . | gene_id | "XLOC_000068"; transcript_id | "Novel_000003"; exon_number | "2"; gene_type | " |
| At_chr1 | Cufflinks | exon | 252626  | 252866  | . | + | . | gene_id | "XLOC_000068"; transcript_id | "Novel_000003"; exon_number | "3"; gene_type | " |
| At_chr1 | Cufflinks | exon | 252951  | 253033  | . | + | . | gene_id | "XLOC_000068"; transcript_id | "Novel_000003"; exon_number | "4"; gene_type | " |
| At_chr1 | Cufflinks | exon | 253111  | 253689  | . | + | . | gene_id | "XLOC_000068"; transcript_id | "Novel_000003"; exon_number | "5"; gene_type | " |
| At_chr1 | Cufflinks | exon | 319812  | 320076  | . | + | . | gene_id | "XLOC_000078"; transcript_id | "Novel_000004"; exon_number | "1"; gene_type | " |
| At_chr1 | Cufflinks | exon | 320341  | 321820  | . | + | . | gene_id | "XLOC_000078"; transcript_id | "Novel_000004"; exon_number | "2"; gene_type | " |
| At_chr1 | Cufflinks | exon | 738853  | 739155  | . | + | . | gene_id | "XLOC_000139"; transcript_id | "Novel_000005"; exon_number | "1"; gene_type | " |
| At_chr1 | Cufflinks | exon | 739877  | 740022  | . | + | . | gene_id | "XLOC_000139"; transcript_id | "Novel_000005"; exon_number | "2"; gene_type | " |
| At_chr1 | Cufflinks | exon | 740416  | 741239  | . | + | . | gene_id | "XLOC_000139"; transcript_id | "Novel_000005"; exon_number | "3"; gene_type | " |
| At_chr1 | Cufflinks | exon | 787719  | 787949  | . | + | . | gene_id | "XLOC_000143"; transcript_id | "Novel_000006"; exon_number | "1"; gene_type | " |
| At_chr1 | Cufflinks | exon | 788923  | 789253  | . | + | . | gene_id | "XLOC_000143"; transcript_id | "Novel_000006"; exon_number | "2"; gene_type | " |
| At_chr1 | Cufflinks | exon | 789475  | 789647  | . | + | . | gene_id | "XLOC_000143"; transcript_id | "Novel_000006"; exon_number | "3"; gene_type | " |
| At_chr1 | Cufflinks | exon | 790044  | 790719  | . | + | . | gene_id | "XLOC_000143"; transcript_id | "Novel_000006"; exon_number | "4"; gene_type | " |
| At_chr1 | Cufflinks | exon | 787744  | 787949  | . | + | . | gene_id | "XLOC_000143"; transcript_id | "Novel_000007"; exon_number | "1"; gene_type | " |
| At_chr1 | Cufflinks | exon | 788923  | 788999  | . | + | . | gene_id | "XLOC_000143"; transcript_id | "Novel_000007"; exon_number | "2"; gene_type | " |
| At_chr1 | Cufflinks | exon | 832040  | 832083  | . | + | . | gene_id | "XLOC_000143"; transcript_id | "Novel_000007"; exon_number | "3"; gene_type | " |
| At_chr1 | Cufflinks | exon | 787758  | 787949  | . | + | . | gene_id | "XLOC_000143"; transcript_id | "Novel_000008"; exon_number | "1"; gene_type | " |
| At_chr1 | Cufflinks | exon | 788923  | 789253  | . | + | . | gene_id | "XLOC_000143"; transcript_id | "Novel_000008"; exon_number | "2"; gene_type | " |
| At_chr1 | Cufflinks | exon | 789475  | 789647  | . | + | . | gene_id | "XLOC_000143"; transcript_id | "Novel_000008"; exon_number | "3"; gene_type | " |
| At_chr1 | Cufflinks | exon | 833092  | 833136  | . | + | . | gene_id | "XLOC_000143"; transcript_id | "Novel_000008"; exon_number | "4"; gene_type | " |
| At_chr1 | Cufflinks | exon | 1080501 | 1080688 | . | + | . | gene_id | "XLOC_000161"; transcript_id | "Novel_000009"; exon_number | "1"; gene_type | " |
| At_chr1 | Cufflinks | exon | 1080778 | 1080881 | . | + | . | gene_id | "XLOC_000161"; transcript_id | "Novel_000009"; exon_number | "2"; gene_type | " |
| At_chr1 | Cufflinks | exon | 1080966 | 1081168 | . | + | . | gene_id | "XLOC_000161"; transcript_id | "Novel_000009"; exon_number | "3"; gene_type | " |
| At_chr1 | Cufflinks | exon | 1081256 | 1081356 | . | + | . | gene_id | "XLOC_000161"; transcript_id | "Novel_000009"; exon_number | "4"; gene_type | " |
| At_chr1 | Cufflinks | exon | 1082155 | 1082347 | . | + | . | gene_id | "XLOC_000161"; transcript_id | "Novel_000009"; exon_number | "5"; gene_type | " |
| At_chr1 | Cufflinks | exon | 1084207 | 1084368 | . | + | . | gene_id | "XLOC_000161"; transcript_id | "Novel_000009"; exon_number | "6"; gene_type | " |
| At_chr1 | Cufflinks | exon | 1084506 | 1084587 | . | + | . | gene_id | "XLOC_000161"; transcript_id | "Novel_000009"; exon_number | "7"; gene_type | " |

|         |           |      |         |         |   |   |   |         |                |               |                 |             |      |           |   |
|---------|-----------|------|---------|---------|---|---|---|---------|----------------|---------------|-----------------|-------------|------|-----------|---|
| At_chr1 | Cufflinks | exon | 1084685 | 1085493 | . | + | . | gene_id | "XLOC_000161"; | transcript_id | "Novel_000009"; | exon_number | "8"; | gene_type | " |
| At_chr1 | Cufflinks | exon | 1080507 | 1080688 | . | + | . | gene_id | "XLOC_000161"; | transcript_id | "Novel_000010"; | exon_number | "1"; | gene_type | " |
| At_chr1 | Cufflinks | exon | 1080778 | 1081168 | . | + | . | gene_id | "XLOC_000161"; | transcript_id | "Novel_000010"; | exon_number | "2"; | gene_type | " |
| At_chr1 | Cufflinks | exon | 1081256 | 1081356 | . | + | . | gene_id | "XLOC_000161"; | transcript_id | "Novel_000010"; | exon_number | "3"; | gene_type | " |
| At_chr1 | Cufflinks | exon | 1082155 | 1082472 | . | + | . | gene_id | "XLOC_000161"; | transcript_id | "Novel_000010"; | exon_number | "4"; | gene_type | " |
| At_chr1 | Cufflinks | exon | 1080510 | 1080688 | . | + | . | gene_id | "XLOC_000161"; | transcript_id | "Novel_000011"; | exon_number | "1"; | gene_type | " |
| At_chr1 | Cufflinks | exon | 1080778 | 1080881 | . | + | . | gene_id | "XLOC_000161"; | transcript_id | "Novel_000011"; | exon_number | "2"; | gene_type | " |
| At_chr1 | Cufflinks | exon | 1080966 | 1081168 | . | + | . | gene_id | "XLOC_000161"; | transcript_id | "Novel_000011"; | exon_number | "3"; | gene_type | " |
| At_chr1 | Cufflinks | exon | 1081256 | 1081356 | . | + | . | gene_id | "XLOC_000161"; | transcript_id | "Novel_000011"; | exon_number | "4"; | gene_type | " |
| At_chr1 | Cufflinks | exon | 1082155 | 1082347 | . | + | . | gene_id | "XLOC_000161"; | transcript_id | "Novel_000011"; | exon_number | "5"; | gene_type | " |
| At_chr1 | Cufflinks | exon | 1084207 | 1084368 | . | + | . | gene_id | "XLOC_000161"; | transcript_id | "Novel_000011"; | exon_number | "6"; | gene_type | " |
| At_chr1 | Cufflinks | exon | 1084506 | 1084587 | . | + | . | gene_id | "XLOC_000161"; | transcript_id | "Novel_000011"; | exon_number | "7"; | gene_type | " |
| At_chr1 | Cufflinks | exon | 1084685 | 1085169 | . | + | . | gene_id | "XLOC_000161"; | transcript_id | "Novel_000011"; | exon_number | "8"; | gene_type | " |
| At_chr1 | Cufflinks | exon | 1085253 | 1086502 | . | + | . | gene_id | "XLOC_000161"; | transcript_id | "Novel_000011"; | exon_number | "9"; | gene_type | " |
| At_chr1 | Cufflinks | exon | 1194255 | 1194637 | . | + | . | gene_id | "XLOC_000171"; | transcript_id | "Novel_000012"; | exon_number | "1"; | gene_type | " |
| At_chr1 | Cufflinks | exon | 1194724 | 1195491 | . | + | . | gene_id | "XLOC_000171"; | transcript_id | "Novel_000012"; | exon_number | "2"; | gene_type | " |
| At_chr1 | Cufflinks | exon | 1668327 | 1668471 | . | + | . | gene_id | "XLOC_000200"; | transcript_id | "Novel_000013"; | exon_number | "1"; | gene_type | " |
| At_chr1 | Cufflinks | exon | 1668917 | 1669028 | . | + | . | gene_id | "XLOC_000200"; | transcript_id | "Novel_000013"; | exon_number | "2"; | gene_type | " |
| At_chr1 | Cufflinks | exon | 1669433 | 1672359 | . | + | . | gene_id | "XLOC_000200"; | transcript_id | "Novel_000013"; | exon_number | "3"; | gene_type | " |
| At_chr1 | Cufflinks | exon | 1882013 | 1883092 | . | + | . | gene_id | "XLOC_000213"; | transcript_id | "Novel_000014"; | exon_number | "1"; | gene_type | " |
| At_chr1 | Cufflinks | exon | 1883229 | 1883926 | . | + | . | gene_id | "XLOC_000213"; | transcript_id | "Novel_000014"; | exon_number | "2"; | gene_type | " |
| At_chr1 | Cufflinks | exon | 1882080 | 1882643 | . | + | . | gene_id | "XLOC_000213"; | transcript_id | "Novel_000015"; | exon_number | "1"; | gene_type | " |
| At_chr1 | Cufflinks | exon | 1882823 | 1883231 | . | + | . | gene_id | "XLOC_000213"; | transcript_id | "Novel_000015"; | exon_number | "2"; | gene_type | " |
| At_chr1 | Cufflinks | exon | 1883214 | 1884237 | . | + | . | gene_id | "XLOC_000213"; | transcript_id | "Novel_000016"; | exon_number | "1"; | gene_type | " |
| At_chr1 | Cufflinks | exon | 1884707 | 1884839 | . | + | . | gene_id | "XLOC_000213"; | transcript_id | "Novel_000016"; | exon_number | "2"; | gene_type | " |
| At_chr1 | Cufflinks | exon | 1884970 | 1885386 | . | + | . | gene_id | "XLOC_000213"; | transcript_id | "Novel_000016"; | exon_number | "3"; | gene_type | " |
| At_chr1 | Cufflinks | exon | 1906899 | 1906961 | . | + | . | gene_id | "XLOC_000218"; | transcript_id | "Novel_000017"; | exon_number | "1"; | gene_type | " |
| At_chr1 | Cufflinks | exon | 1908243 | 1908462 | . | + | . | gene_id | "XLOC_000218"; | transcript_id | "Novel_000017"; | exon_number | "2"; | gene_type | " |
| At_chr1 | Cufflinks | exon | 1908533 | 1910566 | . | + | . | gene_id | "XLOC_000218"; | transcript_id | "Novel_000017"; | exon_number | "3"; | gene_type | " |
| At_chr1 | Cufflinks | exon | 1906915 | 1906961 | . | + | . | gene_id | "XLOC_000218"; | transcript_id | "Novel_000018"; | exon_number | "1"; | gene_type | " |
| At_chr1 | Cufflinks | exon | 1907368 | 1908462 | . | + | . | gene_id | "XLOC_000218"; | transcript_id | "Novel_000018"; | exon_number | "2"; | gene_type | " |
| At_chr1 | Cufflinks | exon | 1908533 | 1910092 | . | + | . | gene_id | "XLOC_000218"; | transcript_id | "Novel_000018"; | exon_number | "3"; | gene_type | " |
| At_chr1 | Cufflinks | exon | 1934909 | 1936993 | . | + | . | gene_id | "XLOC_000220"; | transcript_id | "Novel_000019"; | exon_number | "1"; | gene_type | " |
| At_chr1 | Cufflinks | exon | 1937071 | 1937154 | . | + | . | gene_id | "XLOC_000220"; | transcript_id | "Novel_000019"; | exon_number | "2"; | gene_type | " |
| At_chr1 | Cufflinks | exon | 1937403 | 1937558 | . | + | . | gene_id | "XLOC_000220"; | transcript_id | "Novel_000019"; | exon_number | "3"; | gene_type | " |



|         |           |      |         |         |   |   |   |         |                |               |                 |             |       |           |   |
|---------|-----------|------|---------|---------|---|---|---|---------|----------------|---------------|-----------------|-------------|-------|-----------|---|
| At_chr1 | Cufflinks | exon | 1939623 | 1939957 | . | + | . | gene_id | "XLOC_000220"; | transcript_id | "Novel_000021"; | exon_number | "12"; | gene_type |   |
| At_chr1 | Cufflinks | exon | 1940063 | 1940168 | . | + | . | gene_id | "XLOC_000220"; | transcript_id | "Novel_000021"; | exon_number | "13"; | gene_type |   |
| At_chr1 | Cufflinks | exon | 1940259 | 1940408 | . | + | . | gene_id | "XLOC_000220"; | transcript_id | "Novel_000021"; | exon_number | "14"; | gene_type |   |
| At_chr1 | Cufflinks | exon | 1940493 | 1940806 | . | + | . | gene_id | "XLOC_000220"; | transcript_id | "Novel_000021"; | exon_number | "15"; | gene_type |   |
| At_chr1 | Cufflinks | exon | 1938864 | 1939957 | . | + | . | gene_id | "XLOC_000220"; | transcript_id | "Novel_000022"; | exon_number | "1";  | gene_type | " |
| At_chr1 | Cufflinks | exon | 1940063 | 1940168 | . | + | . | gene_id | "XLOC_000220"; | transcript_id | "Novel_000022"; | exon_number | "2";  | gene_type | " |
| At_chr1 | Cufflinks | exon | 1940259 | 1940408 | . | + | . | gene_id | "XLOC_000220"; | transcript_id | "Novel_000022"; | exon_number | "3";  | gene_type | " |
| At_chr1 | Cufflinks | exon | 1940493 | 1940741 | . | + | . | gene_id | "XLOC_000220"; | transcript_id | "Novel_000022"; | exon_number | "4";  | gene_type | " |
| At_chr1 | Cufflinks | exon | 2471459 | 2471672 | . | + | . | gene_id | "XLOC_000265"; | transcript_id | "Novel_000023"; | exon_number | "1";  | gene_type | " |
| At_chr1 | Cufflinks | exon | 2999462 | 2999926 | . | + | . | gene_id | "XLOC_000326"; | transcript_id | "Novel_000024"; | exon_number | "1";  | gene_type | " |
| At_chr1 | Cufflinks | exon | 3304340 | 3304409 | . | + | . | gene_id | "XLOC_000336"; | transcript_id | "Novel_000025"; | exon_number | "1";  | gene_type | " |
| At_chr1 | Cufflinks | exon | 3304696 | 3305268 | . | + | . | gene_id | "XLOC_000336"; | transcript_id | "Novel_000025"; | exon_number | "2";  | gene_type | " |
| At_chr1 | Cufflinks | exon | 3305936 | 3306584 | . | + | . | gene_id | "XLOC_000336"; | transcript_id | "Novel_000025"; | exon_number | "3";  | gene_type | " |
| At_chr1 | Cufflinks | exon | 3580897 | 3581145 | . | + | . | gene_id | "XLOC_000368"; | transcript_id | "Novel_000026"; | exon_number | "1";  | gene_type | " |
| At_chr1 | Cufflinks | exon | 3581437 | 3583075 | . | + | . | gene_id | "XLOC_000368"; | transcript_id | "Novel_000026"; | exon_number | "2";  | gene_type | " |
| At_chr1 | Cufflinks | exon | 4263363 | 4263597 | . | + | . | gene_id | "XLOC_000440"; | transcript_id | "Novel_000027"; | exon_number | "1";  | gene_type | " |
| At_chr1 | Cufflinks | exon | 4508397 | 4508968 | . | + | . | gene_id | "XLOC_000441"; | transcript_id | "Novel_000028"; | exon_number | "1";  | gene_type | " |
| At_chr1 | Cufflinks | exon | 4517497 | 4517995 | . | + | . | gene_id | "XLOC_000441"; | transcript_id | "Novel_000028"; | exon_number | "2";  | gene_type | " |
| At_chr1 | Cufflinks | exon | 4436677 | 4437044 | . | + | . | gene_id | "XLOC_000464"; | transcript_id | "Novel_000029"; | exon_number | "1";  | gene_type | " |
| At_chr1 | Cufflinks | exon | 5211094 | 5212663 | . | + | . | gene_id | "XLOC_000548"; | transcript_id | "Novel_000030"; | exon_number | "1";  | gene_type | " |
| At_chr1 | Cufflinks | exon | 5212870 | 5212941 | . | + | . | gene_id | "XLOC_000548"; | transcript_id | "Novel_000030"; | exon_number | "2";  | gene_type | " |
| At_chr1 | Cufflinks | exon | 5246960 | 5247111 | . | + | . | gene_id | "XLOC_000554"; | transcript_id | "Novel_000031"; | exon_number | "1";  | gene_type | " |
| At_chr1 | Cufflinks | exon | 5248991 | 5249060 | . | + | . | gene_id | "XLOC_000554"; | transcript_id | "Novel_000031"; | exon_number | "2";  | gene_type | " |
| At_chr1 | Cufflinks | exon | 5249177 | 5249248 | . | + | . | gene_id | "XLOC_000554"; | transcript_id | "Novel_000031"; | exon_number | "3";  | gene_type | " |
| At_chr1 | Cufflinks | exon | 5249356 | 5249427 | . | + | . | gene_id | "XLOC_000554"; | transcript_id | "Novel_000031"; | exon_number | "4";  | gene_type | " |
| At_chr1 | Cufflinks | exon | 5249553 | 5249769 | . | + | . | gene_id | "XLOC_000554"; | transcript_id | "Novel_000031"; | exon_number | "5";  | gene_type | " |
| At_chr1 | Cufflinks | exon | 5254512 | 5254865 | . | + | . | gene_id | "XLOC_000562"; | transcript_id | "Novel_000032"; | exon_number | "1";  | gene_type | " |
| At_chr1 | Cufflinks | exon | 5254990 | 5255061 | . | + | . | gene_id | "XLOC_000562"; | transcript_id | "Novel_000032"; | exon_number | "2";  | gene_type | " |
| At_chr1 | Cufflinks | exon | 5255167 | 5255437 | . | + | . | gene_id | "XLOC_000562"; | transcript_id | "Novel_000032"; | exon_number | "3";  | gene_type | " |
| At_chr1 | Cufflinks | exon | 5254619 | 5254684 | . | + | . | gene_id | "XLOC_000562"; | transcript_id | "Novel_000033"; | exon_number | "1";  | gene_type | " |
| At_chr1 | Cufflinks | exon | 5254794 | 5254865 | . | + | . | gene_id | "XLOC_000562"; | transcript_id | "Novel_000033"; | exon_number | "2";  | gene_type | " |
| At_chr1 | Cufflinks | exon | 5254990 | 5255061 | . | + | . | gene_id | "XLOC_000562"; | transcript_id | "Novel_000033"; | exon_number | "3";  | gene_type | " |
| At_chr1 | Cufflinks | exon | 5255167 | 5255212 | . | + | . | gene_id | "XLOC_000562"; | transcript_id | "Novel_000033"; | exon_number | "4";  | gene_type | " |
| At_chr1 | Cufflinks | exon | 5255729 | 5255951 | . | + | . | gene_id | "XLOC_000562"; | transcript_id | "Novel_000034"; | exon_number | "1";  | gene_type | " |
| At_chr1 | Cufflinks | exon | 5256196 | 5256264 | . | + | . | gene_id | "XLOC_000562"; | transcript_id | "Novel_000034"; | exon_number | "2";  | gene_type | " |

|         |           |      |         |         |   |   |   |         |                |               |                 |             |       |           |   |
|---------|-----------|------|---------|---------|---|---|---|---------|----------------|---------------|-----------------|-------------|-------|-----------|---|
| At_chr1 | Cufflinks | exon | 5256349 | 5256414 | . | + | . | gene_id | "XLOC_000562"; | transcript_id | "Novel_000034"; | exon_number | "3";  | gene_type | " |
| At_chr1 | Cufflinks | exon | 5360663 | 5360722 | . | + | . | gene_id | "XLOC_000562"; | transcript_id | "Novel_000034"; | exon_number | "4";  | gene_type | " |
| At_chr1 | Cufflinks | exon | 5360818 | 5360853 | . | + | . | gene_id | "XLOC_000562"; | transcript_id | "Novel_000034"; | exon_number | "5";  | gene_type | " |
| At_chr1 | Cufflinks | exon | 5360927 | 5360973 | . | + | . | gene_id | "XLOC_000562"; | transcript_id | "Novel_000034"; | exon_number | "6";  | gene_type | " |
| At_chr1 | Cufflinks | exon | 5361057 | 5361433 | . | + | . | gene_id | "XLOC_000562"; | transcript_id | "Novel_000034"; | exon_number | "7";  | gene_type | " |
| At_chr1 | Cufflinks | exon | 5361563 | 5361761 | . | + | . | gene_id | "XLOC_000562"; | transcript_id | "Novel_000034"; | exon_number | "8";  | gene_type | " |
| At_chr1 | Cufflinks | exon | 5363374 | 5364948 | . | + | . | gene_id | "XLOC_000562"; | transcript_id | "Novel_000034"; | exon_number | "9";  | gene_type | " |
| At_chr1 | Cufflinks | exon | 5256773 | 5257315 | . | + | . | gene_id | "XLOC_000562"; | transcript_id | "Novel_000035"; | exon_number | "1";  | gene_type | " |
| At_chr1 | Cufflinks | exon | 5257454 | 5257823 | . | + | . | gene_id | "XLOC_000562"; | transcript_id | "Novel_000035"; | exon_number | "2";  | gene_type | " |
| At_chr1 | Cufflinks | exon | 5380109 | 5380244 | . | + | . | gene_id | "XLOC_000562"; | transcript_id | "Novel_000036"; | exon_number | "1";  | gene_type | " |
| At_chr1 | Cufflinks | exon | 5380498 | 5380557 | . | + | . | gene_id | "XLOC_000562"; | transcript_id | "Novel_000036"; | exon_number | "2";  | gene_type | " |
| At_chr1 | Cufflinks | exon | 5380655 | 5380690 | . | + | . | gene_id | "XLOC_000562"; | transcript_id | "Novel_000036"; | exon_number | "3";  | gene_type | " |
| At_chr1 | Cufflinks | exon | 5380764 | 5380810 | . | + | . | gene_id | "XLOC_000562"; | transcript_id | "Novel_000036"; | exon_number | "4";  | gene_type | " |
| At_chr1 | Cufflinks | exon | 5399962 | 5400338 | . | + | . | gene_id | "XLOC_000562"; | transcript_id | "Novel_000036"; | exon_number | "5";  | gene_type | " |
| At_chr1 | Cufflinks | exon | 5400483 | 5400681 | . | + | . | gene_id | "XLOC_000562"; | transcript_id | "Novel_000036"; | exon_number | "6";  | gene_type | " |
| At_chr1 | Cufflinks | exon | 5400801 | 5400947 | . | + | . | gene_id | "XLOC_000562"; | transcript_id | "Novel_000036"; | exon_number | "7";  | gene_type | " |
| At_chr1 | Cufflinks | exon | 5401146 | 5401264 | . | + | . | gene_id | "XLOC_000562"; | transcript_id | "Novel_000036"; | exon_number | "8";  | gene_type | " |
| At_chr1 | Cufflinks | exon | 5401349 | 5401559 | . | + | . | gene_id | "XLOC_000562"; | transcript_id | "Novel_000036"; | exon_number | "9";  | gene_type | " |
| At_chr1 | Cufflinks | exon | 5401671 | 5401908 | . | + | . | gene_id | "XLOC_000562"; | transcript_id | "Novel_000036"; | exon_number | "10"; | gene_type | " |
| At_chr1 | Cufflinks | exon | 5401997 | 5402147 | . | + | . | gene_id | "XLOC_000562"; | transcript_id | "Novel_000036"; | exon_number | "11"; | gene_type | " |
| At_chr1 | Cufflinks | exon | 5402219 | 5402725 | . | + | . | gene_id | "XLOC_000562"; | transcript_id | "Novel_000036"; | exon_number | "12"; | gene_type | " |
| At_chr1 | Cufflinks | exon | 5400956 | 5401264 | . | + | . | gene_id | "XLOC_000562"; | transcript_id | "Novel_000037"; | exon_number | "1";  | gene_type | " |
| At_chr1 | Cufflinks | exon | 5401349 | 5401559 | . | + | . | gene_id | "XLOC_000562"; | transcript_id | "Novel_000037"; | exon_number | "2";  | gene_type | " |
| At_chr1 | Cufflinks | exon | 5401671 | 5401908 | . | + | . | gene_id | "XLOC_000562"; | transcript_id | "Novel_000037"; | exon_number | "3";  | gene_type | " |
| At_chr1 | Cufflinks | exon | 5401997 | 5402147 | . | + | . | gene_id | "XLOC_000562"; | transcript_id | "Novel_000037"; | exon_number | "4";  | gene_type | " |
| At_chr1 | Cufflinks | exon | 5402219 | 5402791 | . | + | . | gene_id | "XLOC_000562"; | transcript_id | "Novel_000037"; | exon_number | "5";  | gene_type | " |
| At_chr1 | Cufflinks | exon | 5344930 | 5345381 | . | + | . | gene_id | "XLOC_000571"; | transcript_id | "Novel_000038"; | exon_number | "1";  | gene_type | " |
| At_chr1 | Cufflinks | exon | 5345501 | 5346298 | . | + | . | gene_id | "XLOC_000571"; | transcript_id | "Novel_000038"; | exon_number | "2";  | gene_type | " |
| At_chr1 | Cufflinks | exon | 5347994 | 5348571 | . | + | . | gene_id | "XLOC_000572"; | transcript_id | "Novel_000039"; | exon_number | "1";  | gene_type | " |
| At_chr1 | Cufflinks | exon | 5375239 | 5375486 | . | + | . | gene_id | "XLOC_000586"; | transcript_id | "Novel_000040"; | exon_number | "1";  | gene_type | " |
| At_chr1 | Cufflinks | exon | 5375575 | 5375746 | . | + | . | gene_id | "XLOC_000586"; | transcript_id | "Novel_000040"; | exon_number | "2";  | gene_type | " |
| At_chr1 | Cufflinks | exon | 5397416 | 5397487 | . | + | . | gene_id | "XLOC_000586"; | transcript_id | "Novel_000040"; | exon_number | "3";  | gene_type | " |
| At_chr1 | Cufflinks | exon | 5397596 | 5397667 | . | + | . | gene_id | "XLOC_000586"; | transcript_id | "Novel_000040"; | exon_number | "4";  | gene_type | " |
| At_chr1 | Cufflinks | exon | 5397804 | 5397875 | . | + | . | gene_id | "XLOC_000586"; | transcript_id | "Novel_000040"; | exon_number | "5";  | gene_type | " |
| At_chr1 | Cufflinks | exon | 5397986 | 5398057 | . | + | . | gene_id | "XLOC_000586"; | transcript_id | "Novel_000040"; | exon_number | "6";  | gene_type | " |

|         |           |      |         |         |   |   |   |         |                |               |                 |             |       |           |   |
|---------|-----------|------|---------|---------|---|---|---|---------|----------------|---------------|-----------------|-------------|-------|-----------|---|
| At_chr1 | Cufflinks | exon | 5398166 | 5398237 | . | + | . | gene_id | "XLOC_000586"; | transcript_id | "Novel_000040"; | exon_number | "7";  | gene_type | " |
| At_chr1 | Cufflinks | exon | 5398388 | 5398462 | . | + | . | gene_id | "XLOC_000586"; | transcript_id | "Novel_000040"; | exon_number | "8";  | gene_type | " |
| At_chr1 | Cufflinks | exon | 5398573 | 5398644 | . | + | . | gene_id | "XLOC_000586"; | transcript_id | "Novel_000040"; | exon_number | "9";  | gene_type | " |
| At_chr1 | Cufflinks | exon | 5398753 | 5398833 | . | + | . | gene_id | "XLOC_000586"; | transcript_id | "Novel_000040"; | exon_number | "10"; | gene_type | " |
| At_chr1 | Cufflinks | exon | 5398933 | 5399004 | . | + | . | gene_id | "XLOC_000586"; | transcript_id | "Novel_000040"; | exon_number | "11"; | gene_type | " |
| At_chr1 | Cufflinks | exon | 5399098 | 5399133 | . | + | . | gene_id | "XLOC_000586"; | transcript_id | "Novel_000040"; | exon_number | "12"; | gene_type | " |
| At_chr1 | Cufflinks | exon | 5394280 | 5394591 | . | + | . | gene_id | "XLOC_000586"; | transcript_id | "Novel_000041"; | exon_number | "1";  | gene_type | " |
| At_chr1 | Cufflinks | exon | 5394680 | 5394851 | . | + | . | gene_id | "XLOC_000586"; | transcript_id | "Novel_000041"; | exon_number | "2";  | gene_type | " |
| At_chr1 | Cufflinks | exon | 5397416 | 5397487 | . | + | . | gene_id | "XLOC_000586"; | transcript_id | "Novel_000041"; | exon_number | "3";  | gene_type | " |
| At_chr1 | Cufflinks | exon | 5397596 | 5397667 | . | + | . | gene_id | "XLOC_000586"; | transcript_id | "Novel_000041"; | exon_number | "4";  | gene_type | " |
| At_chr1 | Cufflinks | exon | 5397804 | 5397875 | . | + | . | gene_id | "XLOC_000586"; | transcript_id | "Novel_000041"; | exon_number | "5";  | gene_type | " |
| At_chr1 | Cufflinks | exon | 5397986 | 5398057 | . | + | . | gene_id | "XLOC_000586"; | transcript_id | "Novel_000041"; | exon_number | "6";  | gene_type | " |
| At_chr1 | Cufflinks | exon | 5398166 | 5398237 | . | + | . | gene_id | "XLOC_000586"; | transcript_id | "Novel_000041"; | exon_number | "7";  | gene_type | " |
| At_chr1 | Cufflinks | exon | 5398388 | 5398462 | . | + | . | gene_id | "XLOC_000586"; | transcript_id | "Novel_000041"; | exon_number | "8";  | gene_type | " |
| At_chr1 | Cufflinks | exon | 5398573 | 5398644 | . | + | . | gene_id | "XLOC_000586"; | transcript_id | "Novel_000041"; | exon_number | "9";  | gene_type | " |
| At_chr1 | Cufflinks | exon | 5398753 | 5398833 | . | + | . | gene_id | "XLOC_000586"; | transcript_id | "Novel_000041"; | exon_number | "10"; | gene_type | " |
| At_chr1 | Cufflinks | exon | 5398933 | 5399004 | . | + | . | gene_id | "XLOC_000586"; | transcript_id | "Novel_000041"; | exon_number | "11"; | gene_type | " |
| At_chr1 | Cufflinks | exon | 5399098 | 5399175 | . | + | . | gene_id | "XLOC_000586"; | transcript_id | "Novel_000041"; | exon_number | "12"; | gene_type | " |
| At_chr1 | Cufflinks | exon | 5448974 | 5449064 | . | + | . | gene_id | "XLOC_000601"; | transcript_id | "Novel_000042"; | exon_number | "1";  | gene_type | " |
| At_chr1 | Cufflinks | exon | 5449148 | 5449219 | . | + | . | gene_id | "XLOC_000601"; | transcript_id | "Novel_000042"; | exon_number | "2";  | gene_type | " |
| At_chr1 | Cufflinks | exon | 5449311 | 5449456 | . | + | . | gene_id | "XLOC_000601"; | transcript_id | "Novel_000042"; | exon_number | "3";  | gene_type | " |
| At_chr1 | Cufflinks | exon | 5449986 | 5450097 | . | + | . | gene_id | "XLOC_000602"; | transcript_id | "Novel_000043"; | exon_number | "1";  | gene_type | " |
| At_chr1 | Cufflinks | exon | 5451060 | 5451192 | . | + | . | gene_id | "XLOC_000602"; | transcript_id | "Novel_000043"; | exon_number | "2";  | gene_type | " |
| At_chr1 | Cufflinks | exon | 5543440 | 5543844 | . | + | . | gene_id | "XLOC_000612"; | transcript_id | "Novel_000044"; | exon_number | "1";  | gene_type | " |
| At_chr1 | Cufflinks | exon | 5544314 | 5544365 | . | + | . | gene_id | "XLOC_000612"; | transcript_id | "Novel_000044"; | exon_number | "2";  | gene_type | " |
| At_chr1 | Cufflinks | exon | 5598791 | 5598962 | . | + | . | gene_id | "XLOC_000620"; | transcript_id | "Novel_000045"; | exon_number | "1";  | gene_type | " |
| At_chr1 | Cufflinks | exon | 5599365 | 5599482 | . | + | . | gene_id | "XLOC_000620"; | transcript_id | "Novel_000045"; | exon_number | "2";  | gene_type | " |
| At_chr1 | Cufflinks | exon | 5602938 | 5603083 | . | + | . | gene_id | "XLOC_000623"; | transcript_id | "Novel_000046"; | exon_number | "1";  | gene_type | " |
| At_chr1 | Cufflinks | exon | 5604816 | 5607262 | . | + | . | gene_id | "XLOC_000623"; | transcript_id | "Novel_000046"; | exon_number | "2";  | gene_type | " |
| At_chr1 | Cufflinks | exon | 5602938 | 5603083 | . | + | . | gene_id | "XLOC_000623"; | transcript_id | "Novel_000047"; | exon_number | "1";  | gene_type | " |
| At_chr1 | Cufflinks | exon | 5604816 | 5606804 | . | + | . | gene_id | "XLOC_000623"; | transcript_id | "Novel_000047"; | exon_number | "2";  | gene_type | " |
| At_chr1 | Cufflinks | exon | 5606896 | 5607524 | . | + | . | gene_id | "XLOC_000623"; | transcript_id | "Novel_000047"; | exon_number | "3";  | gene_type | " |
| At_chr1 | Cufflinks | exon | 5602938 | 5603083 | . | + | . | gene_id | "XLOC_000623"; | transcript_id | "Novel_000048"; | exon_number | "1";  | gene_type | " |
| At_chr1 | Cufflinks | exon | 5604816 | 5606804 | . | + | . | gene_id | "XLOC_000623"; | transcript_id | "Novel_000048"; | exon_number | "2";  | gene_type | " |
| At_chr1 | Cufflinks | exon | 5606896 | 5606970 | . | + | . | gene_id | "XLOC_000623"; | transcript_id | "Novel_000048"; | exon_number | "3";  | gene_type | " |

|         |           |      |         |         |   |   |   |         |                |               |                 |             |      |           |   |
|---------|-----------|------|---------|---------|---|---|---|---------|----------------|---------------|-----------------|-------------|------|-----------|---|
| At_chr1 | Cufflinks | exon | 5607048 | 5607524 | . | + | . | gene_id | "XLOC_000623"; | transcript_id | "Novel_000048"; | exon_number | "4"; | gene_type | " |
| At_chr1 | Cufflinks | exon | 5672329 | 5673516 | . | + | . | gene_id | "XLOC_000641"; | transcript_id | "Novel_000049"; | exon_number | "1"; | gene_type | " |
| At_chr1 | Cufflinks | exon | 5673592 | 5673657 | . | + | . | gene_id | "XLOC_000641"; | transcript_id | "Novel_000049"; | exon_number | "2"; | gene_type | " |
| At_chr1 | Cufflinks | exon | 5738958 | 5738998 | . | + | . | gene_id | "XLOC_000641"; | transcript_id | "Novel_000049"; | exon_number | "3"; | gene_type | " |
| At_chr1 | Cufflinks | exon | 5822888 | 5822906 | . | + | . | gene_id | "XLOC_000641"; | transcript_id | "Novel_000049"; | exon_number | "4"; | gene_type | " |
| At_chr1 | Cufflinks | exon | 5672329 | 5673516 | . | + | . | gene_id | "XLOC_000641"; | transcript_id | "Novel_000050"; | exon_number | "1"; | gene_type | " |
| At_chr1 | Cufflinks | exon | 5673592 | 5673657 | . | + | . | gene_id | "XLOC_000641"; | transcript_id | "Novel_000050"; | exon_number | "2"; | gene_type | " |
| At_chr1 | Cufflinks | exon | 5738958 | 5738998 | . | + | . | gene_id | "XLOC_000641"; | transcript_id | "Novel_000050"; | exon_number | "3"; | gene_type | " |
| At_chr1 | Cufflinks | exon | 5839298 | 5839316 | . | + | . | gene_id | "XLOC_000641"; | transcript_id | "Novel_000050"; | exon_number | "4"; | gene_type | " |
| At_chr1 | Cufflinks | exon | 5672334 | 5673516 | . | + | . | gene_id | "XLOC_000641"; | transcript_id | "Novel_000051"; | exon_number | "1"; | gene_type | " |
| At_chr1 | Cufflinks | exon | 5673592 | 5673657 | . | + | . | gene_id | "XLOC_000641"; | transcript_id | "Novel_000051"; | exon_number | "2"; | gene_type | " |
| At_chr1 | Cufflinks | exon | 5677727 | 5677894 | . | + | . | gene_id | "XLOC_000641"; | transcript_id | "Novel_000051"; | exon_number | "3"; | gene_type | " |
| At_chr1 | Cufflinks | exon | 5739126 | 5739294 | . | + | . | gene_id | "XLOC_000641"; | transcript_id | "Novel_000051"; | exon_number | "4"; | gene_type | " |
| At_chr1 | Cufflinks | exon | 5672443 | 5673516 | . | + | . | gene_id | "XLOC_000641"; | transcript_id | "Novel_000052"; | exon_number | "1"; | gene_type | " |
| At_chr1 | Cufflinks | exon | 5673592 | 5673657 | . | + | . | gene_id | "XLOC_000641"; | transcript_id | "Novel_000052"; | exon_number | "2"; | gene_type | " |
| At_chr1 | Cufflinks | exon | 5738958 | 5739293 | . | + | . | gene_id | "XLOC_000641"; | transcript_id | "Novel_000052"; | exon_number | "3"; | gene_type | " |
| At_chr1 | Cufflinks | exon | 5672459 | 5673516 | . | + | . | gene_id | "XLOC_000641"; | transcript_id | "Novel_000053"; | exon_number | "1"; | gene_type | " |
| At_chr1 | Cufflinks | exon | 5673592 | 5673657 | . | + | . | gene_id | "XLOC_000641"; | transcript_id | "Novel_000053"; | exon_number | "2"; | gene_type | " |
| At_chr1 | Cufflinks | exon | 5677727 | 5677989 | . | + | . | gene_id | "XLOC_000641"; | transcript_id | "Novel_000053"; | exon_number | "3"; | gene_type | " |
| At_chr1 | Cufflinks | exon | 5721404 | 5721669 | . | + | . | gene_id | "XLOC_000647"; | transcript_id | "Novel_000054"; | exon_number | "1"; | gene_type | " |
| At_chr1 | Cufflinks | exon | 5894229 | 5894243 | . | + | . | gene_id | "XLOC_000676"; | transcript_id | "Novel_000055"; | exon_number | "1"; | gene_type | " |
| At_chr1 | Cufflinks | exon | 5894341 | 5895473 | . | + | . | gene_id | "XLOC_000676"; | transcript_id | "Novel_000055"; | exon_number | "2"; | gene_type | " |
| At_chr1 | Cufflinks | exon | 5930321 | 5930654 | . | + | . | gene_id | "XLOC_000680"; | transcript_id | "Novel_000056"; | exon_number | "1"; | gene_type | " |
| At_chr1 | Cufflinks | exon | 5932645 | 5932990 | . | + | . | gene_id | "XLOC_000680"; | transcript_id | "Novel_000056"; | exon_number | "2"; | gene_type | " |
| At_chr1 | Cufflinks | exon | 5933349 | 5933554 | . | + | . | gene_id | "XLOC_000680"; | transcript_id | "Novel_000056"; | exon_number | "3"; | gene_type | " |
| At_chr1 | Cufflinks | exon | 5963345 | 5963605 | . | + | . | gene_id | "XLOC_000685"; | transcript_id | "Novel_000057"; | exon_number | "1"; | gene_type | " |
| At_chr1 | Cufflinks | exon | 7021160 | 7021813 | . | + | . | gene_id | "XLOC_000835"; | transcript_id | "Novel_000058"; | exon_number | "1"; | gene_type | " |
| At_chr1 | Cufflinks | exon | 7022402 | 7023500 | . | + | . | gene_id | "XLOC_000835"; | transcript_id | "Novel_000058"; | exon_number | "2"; | gene_type | " |
| At_chr1 | Cufflinks | exon | 7024071 | 7024382 | . | + | . | gene_id | "XLOC_000835"; | transcript_id | "Novel_000058"; | exon_number | "3"; | gene_type | " |
| At_chr1 | Cufflinks | exon | 7028302 | 7028584 | . | + | . | gene_id | "XLOC_000835"; | transcript_id | "Novel_000058"; | exon_number | "4"; | gene_type | " |
| At_chr1 | Cufflinks | exon | 7021169 | 7021813 | . | + | . | gene_id | "XLOC_000835"; | transcript_id | "Novel_000059"; | exon_number | "1"; | gene_type | " |
| At_chr1 | Cufflinks | exon | 7022402 | 7023500 | . | + | . | gene_id | "XLOC_000835"; | transcript_id | "Novel_000059"; | exon_number | "2"; | gene_type | " |
| At_chr1 | Cufflinks | exon | 7024071 | 7025113 | . | + | . | gene_id | "XLOC_000835"; | transcript_id | "Novel_000059"; | exon_number | "3"; | gene_type | " |
| At_chr1 | Cufflinks | exon | 7307420 | 7307455 | . | + | . | gene_id | "XLOC_000866"; | transcript_id | "Novel_000060"; | exon_number | "1"; | gene_type | " |
| At_chr1 | Cufflinks | exon | 7307593 | 7307756 | . | + | . | gene_id | "XLOC_000866"; | transcript_id | "Novel_000060"; | exon_number | "2"; | gene_type | " |

|         |           |      |          |          |   |   |   |         |                |               |                 |             |      |           |   |
|---------|-----------|------|----------|----------|---|---|---|---------|----------------|---------------|-----------------|-------------|------|-----------|---|
| At_chr1 | Cufflinks | exon | 7308319  | 7308434  | . | + | . | gene_id | "XLOC_000866"; | transcript_id | "Novel_000060"; | exon_number | "3"; | gene_type | " |
| At_chr1 | Cufflinks | exon | 7308925  | 7310096  | . | + | . | gene_id | "XLOC_000866"; | transcript_id | "Novel_000060"; | exon_number | "4"; | gene_type | " |
| At_chr1 | Cufflinks | exon | 7307449  | 7307756  | . | + | . | gene_id | "XLOC_000866"; | transcript_id | "Novel_000061"; | exon_number | "1"; | gene_type | " |
| At_chr1 | Cufflinks | exon | 7308319  | 7308434  | . | + | . | gene_id | "XLOC_000866"; | transcript_id | "Novel_000061"; | exon_number | "2"; | gene_type | " |
| At_chr1 | Cufflinks | exon | 7308925  | 7309932  | . | + | . | gene_id | "XLOC_000866"; | transcript_id | "Novel_000061"; | exon_number | "3"; | gene_type | " |
| At_chr1 | Cufflinks | exon | 7434785  | 7435028  | . | + | . | gene_id | "XLOC_000886"; | transcript_id | "Novel_000062"; | exon_number | "1"; | gene_type | " |
| At_chr1 | Cufflinks | exon | 7435709  | 7436016  | . | + | . | gene_id | "XLOC_000886"; | transcript_id | "Novel_000062"; | exon_number | "2"; | gene_type | " |
| At_chr1 | Cufflinks | exon | 7436277  | 7436448  | . | + | . | gene_id | "XLOC_000886"; | transcript_id | "Novel_000062"; | exon_number | "3"; | gene_type | " |
| At_chr1 | Cufflinks | exon | 7436540  | 7436746  | . | + | . | gene_id | "XLOC_000886"; | transcript_id | "Novel_000062"; | exon_number | "4"; | gene_type | " |
| At_chr1 | Cufflinks | exon | 7880990  | 7881306  | . | + | . | gene_id | "XLOC_000938"; | transcript_id | "Novel_000063"; | exon_number | "1"; | gene_type | " |
| At_chr1 | Cufflinks | exon | 9318470  | 9318569  | . | + | . | gene_id | "XLOC_001068"; | transcript_id | "Novel_000064"; | exon_number | "1"; | gene_type | " |
| At_chr1 | Cufflinks | exon | 9318659  | 9318860  | . | + | . | gene_id | "XLOC_001068"; | transcript_id | "Novel_000064"; | exon_number | "2"; | gene_type | " |
| At_chr1 | Cufflinks | exon | 11185502 | 11185772 | . | + | . | gene_id | "XLOC_001212"; | transcript_id | "Novel_000065"; | exon_number | "1"; | gene_type | " |
| At_chr1 | Cufflinks | exon | 11185908 | 11186020 | . | + | . | gene_id | "XLOC_001212"; | transcript_id | "Novel_000065"; | exon_number | "2"; | gene_type | " |
| At_chr1 | Cufflinks | exon | 11187899 | 11187937 | . | + | . | gene_id | "XLOC_001212"; | transcript_id | "Novel_000065"; | exon_number | "3"; | gene_type | " |
| At_chr1 | Cufflinks | exon | 11188769 | 11188863 | . | + | . | gene_id | "XLOC_001212"; | transcript_id | "Novel_000065"; | exon_number | "4"; | gene_type | " |
| At_chr1 | Cufflinks | exon | 11189928 | 11190990 | . | + | . | gene_id | "XLOC_001212"; | transcript_id | "Novel_000065"; | exon_number | "5"; | gene_type | " |
| At_chr1 | Cufflinks | exon | 11308656 | 11309089 | . | + | . | gene_id | "XLOC_001225"; | transcript_id | "Novel_000066"; | exon_number | "1"; | gene_type | " |
| At_chr1 | Cufflinks | exon | 11309340 | 11309890 | . | + | . | gene_id | "XLOC_001225"; | transcript_id | "Novel_000066"; | exon_number | "2"; | gene_type | " |
| At_chr1 | Cufflinks | exon | 11310140 | 11310263 | . | + | . | gene_id | "XLOC_001225"; | transcript_id | "Novel_000066"; | exon_number | "3"; | gene_type | " |
| At_chr1 | Cufflinks | exon | 11310468 | 11310516 | . | + | . | gene_id | "XLOC_001225"; | transcript_id | "Novel_000066"; | exon_number | "4"; | gene_type | " |
| At_chr1 | Cufflinks | exon | 11310590 | 11310647 | . | + | . | gene_id | "XLOC_001225"; | transcript_id | "Novel_000066"; | exon_number | "5"; | gene_type | " |
| At_chr1 | Cufflinks | exon | 11310734 | 11310780 | . | + | . | gene_id | "XLOC_001225"; | transcript_id | "Novel_000066"; | exon_number | "6"; | gene_type | " |
| At_chr1 | Cufflinks | exon | 11310875 | 11310952 | . | + | . | gene_id | "XLOC_001225"; | transcript_id | "Novel_000066"; | exon_number | "7"; | gene_type | " |
| At_chr1 | Cufflinks | exon | 11311630 | 11312399 | . | + | . | gene_id | "XLOC_001225"; | transcript_id | "Novel_000066"; | exon_number | "8"; | gene_type | " |
| At_chr1 | Cufflinks | exon | 12985755 | 12986149 | . | + | . | gene_id | "XLOC_001362"; | transcript_id | "Novel_000067"; | exon_number | "1"; | gene_type | " |
| At_chr1 | Cufflinks | exon | 12986292 | 12986547 | . | + | . | gene_id | "XLOC_001362"; | transcript_id | "Novel_000067"; | exon_number | "2"; | gene_type | " |
| At_chr1 | Cufflinks | exon | 15648610 | 15648891 | . | + | . | gene_id | "XLOC_001560"; | transcript_id | "Novel_000068"; | exon_number | "1"; | gene_type | " |
| At_chr1 | Cufflinks | exon | 15648974 | 15649515 | . | + | . | gene_id | "XLOC_001560"; | transcript_id | "Novel_000068"; | exon_number | "2"; | gene_type | " |
| At_chr1 | Cufflinks | exon | 15649611 | 15649697 | . | + | . | gene_id | "XLOC_001560"; | transcript_id | "Novel_000068"; | exon_number | "3"; | gene_type | " |
| At_chr1 | Cufflinks | exon | 15649790 | 15649846 | . | + | . | gene_id | "XLOC_001560"; | transcript_id | "Novel_000068"; | exon_number | "4"; | gene_type | " |
| At_chr1 | Cufflinks | exon | 15650006 | 15650244 | . | + | . | gene_id | "XLOC_001560"; | transcript_id | "Novel_000068"; | exon_number | "5"; | gene_type | " |
| At_chr1 | Cufflinks | exon | 15650317 | 15650435 | . | + | . | gene_id | "XLOC_001560"; | transcript_id | "Novel_000068"; | exon_number | "6"; | gene_type | " |
| At_chr1 | Cufflinks | exon | 15650552 | 15650638 | . | + | . | gene_id | "XLOC_001560"; | transcript_id | "Novel_000068"; | exon_number | "7"; | gene_type | " |
| At_chr1 | Cufflinks | exon | 15650726 | 15651004 | . | + | . | gene_id | "XLOC_001560"; | transcript_id | "Novel_000068"; | exon_number | "8"; | gene_type | " |



|         |           |      |          |          |   |   |   |         |                |               |                 |             |      |           |   |
|---------|-----------|------|----------|----------|---|---|---|---------|----------------|---------------|-----------------|-------------|------|-----------|---|
| At_chr1 | Cufflinks | exon | 15648611 | 15649515 | . | + | . | gene_id | "XLOC_001560"; | transcript_id | "Novel_000069"; | exon_number | "1"; | gene_type | " |
| At_chr1 | Cufflinks | exon | 15649611 | 15649697 | . | + | . | gene_id | "XLOC_001560"; | transcript_id | "Novel_000069"; | exon_number | "2"; | gene_type | " |
| At_chr1 | Cufflinks | exon | 15649790 | 15649846 | . | + | . | gene_id | "XLOC_001560"; | transcript_id | "Novel_000069"; | exon_number | "3"; | gene_type | " |
| At_chr1 | Cufflinks | exon | 15650006 | 15650244 | . | + | . | gene_id | "XLOC_001560"; | transcript_id | "Novel_000069"; | exon_number | "4"; | gene_type | " |
| At_chr1 | Cufflinks | exon | 15650317 | 15650435 | . | + | . | gene_id | "XLOC_001560"; | transcript_id | "Novel_000069"; | exon_number | "5"; | gene_type | " |
| At_chr1 | Cufflinks | exon | 15650552 | 15650638 | . | + | . | gene_id | "XLOC_001560"; | transcript_id | "Novel_000069"; | exon_number | "6"; | gene_type | " |
| At_chr1 | Cufflinks | exon | 15650726 | 15651243 | . | + | . | gene_id | "XLOC_001560"; | transcript_id | "Novel_000069"; | exon_number | "7"; | gene_type | " |
| At_chr1 | Cufflinks | exon | 16976488 | 16976848 | . | + | . | gene_id | "XLOC_001594"; | transcript_id | "Novel_000070"; | exon_number | "1"; | gene_type | " |
| At_chr1 | Cufflinks | exon | 16976956 | 16977085 | . | + | . | gene_id | "XLOC_001594"; | transcript_id | "Novel_000070"; | exon_number | "2"; | gene_type | " |
| At_chr1 | Cufflinks | exon | 16977188 | 16978352 | . | + | . | gene_id | "XLOC_001594"; | transcript_id | "Novel_000070"; | exon_number | "3"; | gene_type | " |
| At_chr1 | Cufflinks | exon | 16976560 | 16976848 | . | + | . | gene_id | "XLOC_001594"; | transcript_id | "Novel_000071"; | exon_number | "1"; | gene_type | " |
| At_chr1 | Cufflinks | exon | 16976956 | 16977078 | . | + | . | gene_id | "XLOC_001594"; | transcript_id | "Novel_000071"; | exon_number | "2"; | gene_type | " |
| At_chr1 | Cufflinks | exon | 16977188 | 16978384 | . | + | . | gene_id | "XLOC_001594"; | transcript_id | "Novel_000071"; | exon_number | "3"; | gene_type | " |
| At_chr1 | Cufflinks | exon | 16976573 | 16977085 | . | + | . | gene_id | "XLOC_001594"; | transcript_id | "Novel_000072"; | exon_number | "1"; | gene_type | " |
| At_chr1 | Cufflinks | exon | 16977188 | 16978247 | . | + | . | gene_id | "XLOC_001594"; | transcript_id | "Novel_000072"; | exon_number | "2"; | gene_type | " |
| At_chr1 | Cufflinks | exon | 23716824 | 23717130 | . | + | . | gene_id | "XLOC_001768"; | transcript_id | "Novel_000073"; | exon_number | "1"; | gene_type | " |
| At_chr1 | Cufflinks | exon | 23717241 | 23718017 | . | + | . | gene_id | "XLOC_001768"; | transcript_id | "Novel_000073"; | exon_number | "2"; | gene_type | " |
| At_chr1 | Cufflinks | exon | 23716951 | 23717130 | . | + | . | gene_id | "XLOC_001768"; | transcript_id | "Novel_000074"; | exon_number | "1"; | gene_type | " |
| At_chr1 | Cufflinks | exon | 23717241 | 23717310 | . | + | . | gene_id | "XLOC_001768"; | transcript_id | "Novel_000074"; | exon_number | "2"; | gene_type | " |
| At_chr1 | Cufflinks | exon | 23717414 | 23718017 | . | + | . | gene_id | "XLOC_001768"; | transcript_id | "Novel_000074"; | exon_number | "3"; | gene_type | " |
| At_chr1 | Cufflinks | exon | 23980696 | 23981082 | . | + | . | gene_id | "XLOC_001780"; | transcript_id | "Novel_000075"; | exon_number | "1"; | gene_type | " |
| At_chr1 | Cufflinks | exon | 23981900 | 23981959 | . | + | . | gene_id | "XLOC_001780"; | transcript_id | "Novel_000075"; | exon_number | "2"; | gene_type | " |
| At_chr1 | Cufflinks | exon | 23982027 | 23984334 | . | + | . | gene_id | "XLOC_001780"; | transcript_id | "Novel_000075"; | exon_number | "3"; | gene_type | " |
| At_chr1 | Cufflinks | exon | 24789379 | 24789833 | . | + | . | gene_id | "XLOC_001820"; | transcript_id | "Novel_000076"; | exon_number | "1"; | gene_type | " |
| At_chr1 | Cufflinks | exon | 24790993 | 24791141 | . | + | . | gene_id | "XLOC_001820"; | transcript_id | "Novel_000076"; | exon_number | "2"; | gene_type | " |
| At_chr1 | Cufflinks | exon | 30676981 | 30677445 | . | + | . | gene_id | "XLOC_002016"; | transcript_id | "Novel_000077"; | exon_number | "1"; | gene_type | " |
| At_chr1 | Cufflinks | exon | 30679363 | 30680451 | . | + | . | gene_id | "XLOC_002016"; | transcript_id | "Novel_000077"; | exon_number | "2"; | gene_type | " |
| At_chr1 | Cufflinks | exon | 40201293 | 40201580 | . | + | . | gene_id | "XLOC_002406"; | transcript_id | "Novel_000078"; | exon_number | "1"; | gene_type | " |
| At_chr1 | Cufflinks | exon | 40201778 | 40201843 | . | + | . | gene_id | "XLOC_002406"; | transcript_id | "Novel_000078"; | exon_number | "2"; | gene_type | " |
| At_chr1 | Cufflinks | exon | 40202577 | 40203016 | . | + | . | gene_id | "XLOC_002406"; | transcript_id | "Novel_000078"; | exon_number | "3"; | gene_type | " |
| At_chr1 | Cufflinks | exon | 40201318 | 40201571 | . | + | . | gene_id | "XLOC_002406"; | transcript_id | "Novel_000079"; | exon_number | "1"; | gene_type | " |
| At_chr1 | Cufflinks | exon | 40201778 | 40201843 | . | + | . | gene_id | "XLOC_002406"; | transcript_id | "Novel_000079"; | exon_number | "2"; | gene_type | " |
| At_chr1 | Cufflinks | exon | 40202577 | 40202694 | . | + | . | gene_id | "XLOC_002406"; | transcript_id | "Novel_000079"; | exon_number | "3"; | gene_type | " |
| At_chr1 | Cufflinks | exon | 40203718 | 40203769 | . | + | . | gene_id | "XLOC_002406"; | transcript_id | "Novel_000079"; | exon_number | "4"; | gene_type | " |
| At_chr1 | Cufflinks | exon | 40203875 | 40204311 | . | + | . | gene_id | "XLOC_002406"; | transcript_id | "Novel_000079"; | exon_number | "5"; | gene_type | " |

|         |           |      |          |          |   |   |   |         |                |               |                 |             |      |           |   |
|---------|-----------|------|----------|----------|---|---|---|---------|----------------|---------------|-----------------|-------------|------|-----------|---|
| At_chr1 | Cufflinks | exon | 40201349 | 40201580 | . | + | . | gene_id | "XLOC_002406"; | transcript_id | "Novel_000080"; | exon_number | "1"; | gene_type | " |
| At_chr1 | Cufflinks | exon | 40201778 | 40201843 | . | + | . | gene_id | "XLOC_002406"; | transcript_id | "Novel_000080"; | exon_number | "2"; | gene_type | " |
| At_chr1 | Cufflinks | exon | 40202577 | 40202694 | . | + | . | gene_id | "XLOC_002406"; | transcript_id | "Novel_000080"; | exon_number | "3"; | gene_type | " |
| At_chr1 | Cufflinks | exon | 40203718 | 40203769 | . | + | . | gene_id | "XLOC_002406"; | transcript_id | "Novel_000080"; | exon_number | "4"; | gene_type | " |
| At_chr1 | Cufflinks | exon | 40203875 | 40204072 | . | + | . | gene_id | "XLOC_002406"; | transcript_id | "Novel_000080"; | exon_number | "5"; | gene_type | " |
| At_chr1 | Cufflinks | exon | 43178845 | 43179249 | . | + | . | gene_id | "XLOC_002529"; | transcript_id | "Novel_000081"; | exon_number | "1"; | gene_type | " |
| At_chr1 | Cufflinks | exon | 43179344 | 43179471 | . | + | . | gene_id | "XLOC_002529"; | transcript_id | "Novel_000081"; | exon_number | "2"; | gene_type | " |
| At_chr1 | Cufflinks | exon | 43179578 | 43179820 | . | + | . | gene_id | "XLOC_002529"; | transcript_id | "Novel_000081"; | exon_number | "3"; | gene_type | " |
| At_chr1 | Cufflinks | exon | 43179911 | 43180163 | . | + | . | gene_id | "XLOC_002529"; | transcript_id | "Novel_000081"; | exon_number | "4"; | gene_type | " |
| At_chr1 | Cufflinks | exon | 43180586 | 43180989 | . | + | . | gene_id | "XLOC_002529"; | transcript_id | "Novel_000081"; | exon_number | "5"; | gene_type | " |
| At_chr1 | Cufflinks | exon | 52074297 | 52074645 | . | + | . | gene_id | "XLOC_002979"; | transcript_id | "Novel_000082"; | exon_number | "1"; | gene_type | " |
| At_chr1 | Cufflinks | exon | 52079658 | 52081050 | . | + | . | gene_id | "XLOC_002979"; | transcript_id | "Novel_000082"; | exon_number | "2"; | gene_type | " |
| At_chr1 | Cufflinks | exon | 54086836 | 54087469 | . | + | . | gene_id | "XLOC_003223"; | transcript_id | "Novel_000083"; | exon_number | "1"; | gene_type | " |
| At_chr1 | Cufflinks | exon | 54087967 | 54088461 | . | + | . | gene_id | "XLOC_003223"; | transcript_id | "Novel_000083"; | exon_number | "2"; | gene_type | " |
| At_chr1 | Cufflinks | exon | 54437877 | 54437975 | . | + | . | gene_id | "XLOC_003261"; | transcript_id | "Novel_000084"; | exon_number | "1"; | gene_type | " |
| At_chr1 | Cufflinks | exon | 54438531 | 54438656 | . | + | . | gene_id | "XLOC_003261"; | transcript_id | "Novel_000084"; | exon_number | "2"; | gene_type | " |
| At_chr1 | Cufflinks | exon | 61428978 | 61429397 | . | + | . | gene_id | "XLOC_003639"; | transcript_id | "Novel_000085"; | exon_number | "1"; | gene_type | " |
| At_chr1 | Cufflinks | exon | 61429908 | 61430014 | . | + | . | gene_id | "XLOC_003639"; | transcript_id | "Novel_000085"; | exon_number | "2"; | gene_type | " |
| At_chr1 | Cufflinks | exon | 61430677 | 61431861 | . | + | . | gene_id | "XLOC_003641"; | transcript_id | "Novel_000086"; | exon_number | "1"; | gene_type | " |
| At_chr1 | Cufflinks | exon | 61432031 | 61433320 | . | + | . | gene_id | "XLOC_003641"; | transcript_id | "Novel_000086"; | exon_number | "2"; | gene_type | " |
| At_chr1 | Cufflinks | exon | 61430677 | 61431593 | . | + | . | gene_id | "XLOC_003641"; | transcript_id | "Novel_000087"; | exon_number | "1"; | gene_type | " |
| At_chr1 | Cufflinks | exon | 61432031 | 61433320 | . | + | . | gene_id | "XLOC_003641"; | transcript_id | "Novel_000087"; | exon_number | "2"; | gene_type | " |
| At_chr1 | Cufflinks | exon | 62903659 | 62903913 | . | + | . | gene_id | "XLOC_003687"; | transcript_id | "Novel_000088"; | exon_number | "1"; | gene_type | " |
| At_chr1 | Cufflinks | exon | 65799268 | 65799653 | . | + | . | gene_id | "XLOC_003775"; | transcript_id | "Novel_000089"; | exon_number | "1"; | gene_type | " |
| At_chr1 | Cufflinks | exon | 65799732 | 65800107 | . | + | . | gene_id | "XLOC_003775"; | transcript_id | "Novel_000089"; | exon_number | "2"; | gene_type | " |
| At_chr1 | Cufflinks | exon | 67974745 | 67974900 | . | + | . | gene_id | "XLOC_003874"; | transcript_id | "Novel_000090"; | exon_number | "1"; | gene_type | " |
| At_chr1 | Cufflinks | exon | 67975012 | 67975547 | . | + | . | gene_id | "XLOC_003874"; | transcript_id | "Novel_000090"; | exon_number | "2"; | gene_type | " |
| At_chr1 | Cufflinks | exon | 73129878 | 73130276 | . | + | . | gene_id | "XLOC_004041"; | transcript_id | "Novel_000091"; | exon_number | "1"; | gene_type | " |
| At_chr1 | Cufflinks | exon | 73130371 | 73130506 | . | + | . | gene_id | "XLOC_004041"; | transcript_id | "Novel_000091"; | exon_number | "2"; | gene_type | " |
| At_chr1 | Cufflinks | exon | 73130596 | 73130710 | . | + | . | gene_id | "XLOC_004041"; | transcript_id | "Novel_000091"; | exon_number | "3"; | gene_type | " |
| At_chr1 | Cufflinks | exon | 83334317 | 83334534 | . | + | . | gene_id | "XLOC_004462"; | transcript_id | "Novel_000092"; | exon_number | "1"; | gene_type | " |
| At_chr1 | Cufflinks | exon | 85419262 | 85420812 | . | + | . | gene_id | "XLOC_004586"; | transcript_id | "Novel_000093"; | exon_number | "1"; | gene_type | " |
| At_chr1 | Cufflinks | exon | 90690136 | 90690478 | . | + | . | gene_id | "XLOC_004912"; | transcript_id | "Novel_000094"; | exon_number | "1"; | gene_type | " |
| At_chr1 | Cufflinks | exon | 90690599 | 90690817 | . | + | . | gene_id | "XLOC_004912"; | transcript_id | "Novel_000094"; | exon_number | "2"; | gene_type | " |
| At_chr1 | Cufflinks | exon | 90694958 | 90695399 | . | + | . | gene_id | "XLOC_004912"; | transcript_id | "Novel_000094"; | exon_number | "3"; | gene_type | " |



|         |           |      |         |         |   |   |         |                |               |                 |             |      |           |   |
|---------|-----------|------|---------|---------|---|---|---------|----------------|---------------|-----------------|-------------|------|-----------|---|
| At_chr1 | Cufflinks | exon | 889591  | 889670  | . | . | gene_id | "XLOC_005866"; | transcript_id | "Novel_000107"; | exon_number | "2"; | gene_type | " |
| At_chr1 | Cufflinks | exon | 889761  | 890256  | . | . | gene_id | "XLOC_005866"; | transcript_id | "Novel_000107"; | exon_number | "3"; | gene_type | " |
| At_chr1 | Cufflinks | exon | 890345  | 890414  | . | . | gene_id | "XLOC_005866"; | transcript_id | "Novel_000107"; | exon_number | "4"; | gene_type | " |
| At_chr1 | Cufflinks | exon | 891279  | 891442  | . | . | gene_id | "XLOC_005866"; | transcript_id | "Novel_000107"; | exon_number | "5"; | gene_type | " |
| At_chr1 | Cufflinks | exon | 1019781 | 1020001 | . | . | gene_id | "XLOC_005875"; | transcript_id | "Novel_000108"; | exon_number | "1"; | gene_type | " |
| At_chr1 | Cufflinks | exon | 1332934 | 1335909 | . | . | gene_id | "XLOC_005924"; | transcript_id | "Novel_000109"; | exon_number | "1"; | gene_type | " |
| At_chr1 | Cufflinks | exon | 1337359 | 1337590 | . | . | gene_id | "XLOC_005924"; | transcript_id | "Novel_000109"; | exon_number | "2"; | gene_type | " |
| At_chr1 | Cufflinks | exon | 1332934 | 1335694 | . | . | gene_id | "XLOC_005924"; | transcript_id | "Novel_000110"; | exon_number | "1"; | gene_type | " |
| At_chr1 | Cufflinks | exon | 1335795 | 1335909 | . | . | gene_id | "XLOC_005924"; | transcript_id | "Novel_000110"; | exon_number | "2"; | gene_type | " |
| At_chr1 | Cufflinks | exon | 1337359 | 1337590 | . | . | gene_id | "XLOC_005924"; | transcript_id | "Novel_000110"; | exon_number | "3"; | gene_type | " |
| At_chr1 | Cufflinks | exon | 1383901 | 1384110 | . | . | gene_id | "XLOC_005937"; | transcript_id | "Novel_000111"; | exon_number | "1"; | gene_type | " |
| At_chr1 | Cufflinks | exon | 1489820 | 1493084 | . | . | gene_id | "XLOC_005953"; | transcript_id | "Novel_000112"; | exon_number | "1"; | gene_type | " |
| At_chr1 | Cufflinks | exon | 1805153 | 1805509 | . | . | gene_id | "XLOC_005992"; | transcript_id | "Novel_000113"; | exon_number | "1"; | gene_type | " |
| At_chr1 | Cufflinks | exon | 2006032 | 2006604 | . | . | gene_id | "XLOC_006005"; | transcript_id | "Novel_000114"; | exon_number | "1"; | gene_type | " |
| At_chr1 | Cufflinks | exon | 2006698 | 2007009 | . | . | gene_id | "XLOC_006005"; | transcript_id | "Novel_000114"; | exon_number | "2"; | gene_type | " |
| At_chr1 | Cufflinks | exon | 2040784 | 2041262 | . | . | gene_id | "XLOC_006014"; | transcript_id | "Novel_000115"; | exon_number | "1"; | gene_type | " |
| At_chr1 | Cufflinks | exon | 2041373 | 2042797 | . | . | gene_id | "XLOC_006014"; | transcript_id | "Novel_000115"; | exon_number | "2"; | gene_type | " |
| At_chr1 | Cufflinks | exon | 2134698 | 2135004 | . | . | gene_id | "XLOC_006040"; | transcript_id | "Novel_000116"; | exon_number | "1"; | gene_type | " |
| At_chr1 | Cufflinks | exon | 2135083 | 2135194 | . | . | gene_id | "XLOC_006040"; | transcript_id | "Novel_000116"; | exon_number | "2"; | gene_type | " |
| At_chr1 | Cufflinks | exon | 2135345 | 2135637 | . | . | gene_id | "XLOC_006040"; | transcript_id | "Novel_000116"; | exon_number | "3"; | gene_type | " |
| At_chr1 | Cufflinks | exon | 2135748 | 2135797 | . | . | gene_id | "XLOC_006040"; | transcript_id | "Novel_000116"; | exon_number | "4"; | gene_type | " |
| At_chr1 | Cufflinks | exon | 2136044 | 2136068 | . | . | gene_id | "XLOC_006040"; | transcript_id | "Novel_000116"; | exon_number | "5"; | gene_type | " |
| At_chr1 | Cufflinks | exon | 2136409 | 2136605 | . | . | gene_id | "XLOC_006041"; | transcript_id | "Novel_000117"; | exon_number | "1"; | gene_type | " |
| At_chr1 | Cufflinks | exon | 2136724 | 2137211 | . | . | gene_id | "XLOC_006041"; | transcript_id | "Novel_000117"; | exon_number | "2"; | gene_type | " |
| At_chr1 | Cufflinks | exon | 2742476 | 2743913 | . | . | gene_id | "XLOC_006087"; | transcript_id | "Novel_000118"; | exon_number | "1"; | gene_type | " |
| At_chr1 | Cufflinks | exon | 2744905 | 2744945 | . | . | gene_id | "XLOC_006087"; | transcript_id | "Novel_000118"; | exon_number | "2"; | gene_type | " |
| At_chr1 | Cufflinks | exon | 2746658 | 2747327 | . | . | gene_id | "XLOC_006087"; | transcript_id | "Novel_000118"; | exon_number | "3"; | gene_type | " |
| At_chr1 | Cufflinks | exon | 2775310 | 2776221 | . | . | gene_id | "XLOC_006097"; | transcript_id | "Novel_000119"; | exon_number | "1"; | gene_type | " |
| At_chr1 | Cufflinks | exon | 2870379 | 2870759 | . | . | gene_id | "XLOC_006128"; | transcript_id | "Novel_000120"; | exon_number | "1"; | gene_type | " |
| At_chr1 | Cufflinks | exon | 2871285 | 2871597 | . | . | gene_id | "XLOC_006128"; | transcript_id | "Novel_000120"; | exon_number | "2"; | gene_type | " |
| At_chr1 | Cufflinks | exon | 2877189 | 2879339 | . | . | gene_id | "XLOC_006129"; | transcript_id | "Novel_000121"; | exon_number | "1"; | gene_type | " |
| At_chr1 | Cufflinks | exon | 3441495 | 3441708 | . | . | gene_id | "XLOC_006178"; | transcript_id | "Novel_000122"; | exon_number | "1"; | gene_type | " |
| At_chr1 | Cufflinks | exon | 3535165 | 3536313 | . | . | gene_id | "XLOC_006191"; | transcript_id | "Novel_000123"; | exon_number | "1"; | gene_type | " |
| At_chr1 | Cufflinks | exon | 3536575 | 3537143 | . | . | gene_id | "XLOC_006191"; | transcript_id | "Novel_000123"; | exon_number | "2"; | gene_type | " |
| At_chr1 | Cufflinks | exon | 3550179 | 3551482 | . | . | gene_id | "XLOC_006198"; | transcript_id | "Novel_000124"; | exon_number | "1"; | gene_type | " |

|         |           |      |         |         |   |   |         |                |               |                 |             |      |           |   |
|---------|-----------|------|---------|---------|---|---|---------|----------------|---------------|-----------------|-------------|------|-----------|---|
| At_chr1 | Cufflinks | exon | 3551620 | 3552140 | . | . | gene_id | "XLOC_006198"; | transcript_id | "Novel_000124"; | exon_number | "2"; | gene_type | " |
| At_chr1 | Cufflinks | exon | 3550179 | 3551861 | . | . | gene_id | "XLOC_006198"; | transcript_id | "Novel_000125"; | exon_number | "1"; | gene_type | " |
| At_chr1 | Cufflinks | exon | 3552511 | 3552551 | . | . | gene_id | "XLOC_006198"; | transcript_id | "Novel_000125"; | exon_number | "2"; | gene_type | " |
| At_chr1 | Cufflinks | exon | 3554278 | 3555185 | . | . | gene_id | "XLOC_006198"; | transcript_id | "Novel_000125"; | exon_number | "3"; | gene_type | " |
| At_chr1 | Cufflinks | exon | 3550304 | 3551861 | . | . | gene_id | "XLOC_006198"; | transcript_id | "Novel_000126"; | exon_number | "1"; | gene_type | " |
| At_chr1 | Cufflinks | exon | 3552511 | 3555210 | . | . | gene_id | "XLOC_006198"; | transcript_id | "Novel_000126"; | exon_number | "2"; | gene_type | " |
| At_chr1 | Cufflinks | exon | 3552356 | 3552551 | . | . | gene_id | "XLOC_006198"; | transcript_id | "Novel_000127"; | exon_number | "1"; | gene_type | " |
| At_chr1 | Cufflinks | exon | 3554278 | 3555107 | . | . | gene_id | "XLOC_006198"; | transcript_id | "Novel_000127"; | exon_number | "2"; | gene_type | " |
| At_chr1 | Cufflinks | exon | 3557092 | 3557695 | . | . | gene_id | "XLOC_006199"; | transcript_id | "Novel_000128"; | exon_number | "1"; | gene_type | " |
| At_chr1 | Cufflinks | exon | 3558889 | 3558969 | . | . | gene_id | "XLOC_006199"; | transcript_id | "Novel_000128"; | exon_number | "2"; | gene_type | " |
| At_chr1 | Cufflinks | exon | 3559835 | 3559985 | . | . | gene_id | "XLOC_006199"; | transcript_id | "Novel_000128"; | exon_number | "3"; | gene_type | " |
| At_chr1 | Cufflinks | exon | 3574112 | 3575274 | . | . | gene_id | "XLOC_006201"; | transcript_id | "Novel_000129"; | exon_number | "1"; | gene_type | " |
| At_chr1 | Cufflinks | exon | 3575514 | 3576195 | . | . | gene_id | "XLOC_006201"; | transcript_id | "Novel_000129"; | exon_number | "2"; | gene_type | " |
| At_chr1 | Cufflinks | exon | 3602762 | 3602970 | . | . | gene_id | "XLOC_006220"; | transcript_id | "Novel_000130"; | exon_number | "1"; | gene_type | " |
| At_chr1 | Cufflinks | exon | 3638163 | 3638245 | . | . | gene_id | "XLOC_006233"; | transcript_id | "Novel_000131"; | exon_number | "1"; | gene_type | " |
| At_chr1 | Cufflinks | exon | 3638894 | 3641430 | . | . | gene_id | "XLOC_006233"; | transcript_id | "Novel_000131"; | exon_number | "2"; | gene_type | " |
| At_chr1 | Cufflinks | exon | 3638732 | 3639661 | . | . | gene_id | "XLOC_006233"; | transcript_id | "Novel_000132"; | exon_number | "1"; | gene_type | " |
| At_chr1 | Cufflinks | exon | 3639795 | 3641381 | . | . | gene_id | "XLOC_006233"; | transcript_id | "Novel_000132"; | exon_number | "2"; | gene_type | " |
| At_chr1 | Cufflinks | exon | 3642211 | 3644330 | . | . | gene_id | "XLOC_006233"; | transcript_id | "Novel_000133"; | exon_number | "1"; | gene_type | " |
| At_chr1 | Cufflinks | exon | 4421991 | 4422308 | . | . | gene_id | "XLOC_006298"; | transcript_id | "Novel_000134"; | exon_number | "1"; | gene_type | " |
| At_chr1 | Cufflinks | exon | 4973969 | 4973999 | . | . | gene_id | "XLOC_006356"; | transcript_id | "Novel_000135"; | exon_number | "1"; | gene_type | " |
| At_chr1 | Cufflinks | exon | 4983061 | 4983922 | . | . | gene_id | "XLOC_006356"; | transcript_id | "Novel_000135"; | exon_number | "2"; | gene_type | " |
| At_chr1 | Cufflinks | exon | 5013740 | 5013855 | . | . | gene_id | "XLOC_006362"; | transcript_id | "Novel_000136"; | exon_number | "1"; | gene_type | " |
| At_chr1 | Cufflinks | exon | 5025735 | 5025918 | . | . | gene_id | "XLOC_006362"; | transcript_id | "Novel_000136"; | exon_number | "2"; | gene_type | " |
| At_chr1 | Cufflinks | exon | 5276695 | 5277761 | . | . | gene_id | "XLOC_006394"; | transcript_id | "Novel_000137"; | exon_number | "1"; | gene_type | " |
| At_chr1 | Cufflinks | exon | 5278992 | 5279282 | . | . | gene_id | "XLOC_006394"; | transcript_id | "Novel_000137"; | exon_number | "2"; | gene_type | " |
| At_chr1 | Cufflinks | exon | 5279593 | 5279811 | . | . | gene_id | "XLOC_006394"; | transcript_id | "Novel_000137"; | exon_number | "3"; | gene_type | " |
| At_chr1 | Cufflinks | exon | 5279892 | 5280541 | . | . | gene_id | "XLOC_006394"; | transcript_id | "Novel_000137"; | exon_number | "4"; | gene_type | " |
| At_chr1 | Cufflinks | exon | 5277254 | 5277761 | . | . | gene_id | "XLOC_006394"; | transcript_id | "Novel_000138"; | exon_number | "1"; | gene_type | " |
| At_chr1 | Cufflinks | exon | 5278992 | 5280543 | . | . | gene_id | "XLOC_006394"; | transcript_id | "Novel_000138"; | exon_number | "2"; | gene_type | " |
| At_chr1 | Cufflinks | exon | 5575068 | 5575119 | . | . | gene_id | "XLOC_006407"; | transcript_id | "Novel_000139"; | exon_number | "1"; | gene_type | " |
| At_chr1 | Cufflinks | exon | 5575589 | 5576002 | . | . | gene_id | "XLOC_006407"; | transcript_id | "Novel_000139"; | exon_number | "2"; | gene_type | " |
| At_chr1 | Cufflinks | exon | 5624977 | 5625648 | . | . | gene_id | "XLOC_006419"; | transcript_id | "Novel_000140"; | exon_number | "1"; | gene_type | " |
| At_chr1 | Cufflinks | exon | 5625847 | 5626001 | . | . | gene_id | "XLOC_006419"; | transcript_id | "Novel_000140"; | exon_number | "2"; | gene_type | " |
| At_chr1 | Cufflinks | exon | 5626106 | 5626207 | . | . | gene_id | "XLOC_006419"; | transcript_id | "Novel_000140"; | exon_number | "3"; | gene_type | " |

|         |           |      |         |         |   |   |         |                |               |                 |             |       |           |   |
|---------|-----------|------|---------|---------|---|---|---------|----------------|---------------|-----------------|-------------|-------|-----------|---|
| At_chr1 | Cufflinks | exon | 5626321 | 5626532 | . | . | gene_id | "XLOC_006419"; | transcript_id | "Novel_000140"; | exon_number | "4";  | gene_type | " |
| At_chr1 | Cufflinks | exon | 5626666 | 5626821 | . | . | gene_id | "XLOC_006419"; | transcript_id | "Novel_000140"; | exon_number | "5";  | gene_type | " |
| At_chr1 | Cufflinks | exon | 5626919 | 5627068 | . | . | gene_id | "XLOC_006419"; | transcript_id | "Novel_000140"; | exon_number | "6";  | gene_type | " |
| At_chr1 | Cufflinks | exon | 5627589 | 5627648 | . | . | gene_id | "XLOC_006419"; | transcript_id | "Novel_000140"; | exon_number | "7";  | gene_type | " |
| At_chr1 | Cufflinks | exon | 5627758 | 5627885 | . | . | gene_id | "XLOC_006419"; | transcript_id | "Novel_000140"; | exon_number | "8";  | gene_type | " |
| At_chr1 | Cufflinks | exon | 5628116 | 5628524 | . | . | gene_id | "XLOC_006419"; | transcript_id | "Novel_000140"; | exon_number | "9";  | gene_type | " |
| At_chr1 | Cufflinks | exon | 5629756 | 5630259 | . | . | gene_id | "XLOC_006419"; | transcript_id | "Novel_000140"; | exon_number | "10"; | gene_type | " |
| At_chr1 | Cufflinks | exon | 5624978 | 5625670 | . | . | gene_id | "XLOC_006419"; | transcript_id | "Novel_000141"; | exon_number | "1";  | gene_type | " |
| At_chr1 | Cufflinks | exon | 5625847 | 5626001 | . | . | gene_id | "XLOC_006419"; | transcript_id | "Novel_000141"; | exon_number | "2";  | gene_type | " |
| At_chr1 | Cufflinks | exon | 5626106 | 5626207 | . | . | gene_id | "XLOC_006419"; | transcript_id | "Novel_000141"; | exon_number | "3";  | gene_type | " |
| At_chr1 | Cufflinks | exon | 5626321 | 5626532 | . | . | gene_id | "XLOC_006419"; | transcript_id | "Novel_000141"; | exon_number | "4";  | gene_type | " |
| At_chr1 | Cufflinks | exon | 5626666 | 5626821 | . | . | gene_id | "XLOC_006419"; | transcript_id | "Novel_000141"; | exon_number | "5";  | gene_type | " |
| At_chr1 | Cufflinks | exon | 5626919 | 5627223 | . | . | gene_id | "XLOC_006419"; | transcript_id | "Novel_000141"; | exon_number | "6";  | gene_type | " |
| At_chr1 | Cufflinks | exon | 5625075 | 5625648 | . | . | gene_id | "XLOC_006419"; | transcript_id | "Novel_000142"; | exon_number | "1";  | gene_type | " |
| At_chr1 | Cufflinks | exon | 5625847 | 5626001 | . | . | gene_id | "XLOC_006419"; | transcript_id | "Novel_000142"; | exon_number | "2";  | gene_type | " |
| At_chr1 | Cufflinks | exon | 5626106 | 5626207 | . | . | gene_id | "XLOC_006419"; | transcript_id | "Novel_000142"; | exon_number | "3";  | gene_type | " |
| At_chr1 | Cufflinks | exon | 5626321 | 5626532 | . | . | gene_id | "XLOC_006419"; | transcript_id | "Novel_000142"; | exon_number | "4";  | gene_type | " |
| At_chr1 | Cufflinks | exon | 5626666 | 5626821 | . | . | gene_id | "XLOC_006419"; | transcript_id | "Novel_000142"; | exon_number | "5";  | gene_type | " |
| At_chr1 | Cufflinks | exon | 5626919 | 5627580 | . | . | gene_id | "XLOC_006419"; | transcript_id | "Novel_000142"; | exon_number | "6";  | gene_type | " |
| At_chr1 | Cufflinks | exon | 5749359 | 5749732 | . | . | gene_id | "XLOC_006432"; | transcript_id | "Novel_000143"; | exon_number | "1";  | gene_type | " |
| At_chr1 | Cufflinks | exon | 5749893 | 5750078 | . | . | gene_id | "XLOC_006432"; | transcript_id | "Novel_000143"; | exon_number | "2";  | gene_type | " |
| At_chr1 | Cufflinks | exon | 5750191 | 5750313 | . | . | gene_id | "XLOC_006432"; | transcript_id | "Novel_000143"; | exon_number | "3";  | gene_type | " |
| At_chr1 | Cufflinks | exon | 5851994 | 5852493 | . | . | gene_id | "XLOC_006432"; | transcript_id | "Novel_000144"; | exon_number | "1";  | gene_type | " |
| At_chr1 | Cufflinks | exon | 5852601 | 5852830 | . | . | gene_id | "XLOC_006432"; | transcript_id | "Novel_000144"; | exon_number | "2";  | gene_type | " |
| At_chr1 | Cufflinks | exon | 5852923 | 5853035 | . | . | gene_id | "XLOC_006432"; | transcript_id | "Novel_000144"; | exon_number | "3";  | gene_type | " |
| At_chr1 | Cufflinks | exon | 5853448 | 5853531 | . | . | gene_id | "XLOC_006432"; | transcript_id | "Novel_000144"; | exon_number | "4";  | gene_type | " |
| At_chr1 | Cufflinks | exon | 5853982 | 5854097 | . | . | gene_id | "XLOC_006432"; | transcript_id | "Novel_000144"; | exon_number | "5";  | gene_type | " |
| At_chr1 | Cufflinks | exon | 5854174 | 5854293 | . | . | gene_id | "XLOC_006432"; | transcript_id | "Novel_000144"; | exon_number | "6";  | gene_type | " |
| At_chr1 | Cufflinks | exon | 5855164 | 5855275 | . | . | gene_id | "XLOC_006432"; | transcript_id | "Novel_000144"; | exon_number | "7";  | gene_type | " |
| At_chr1 | Cufflinks | exon | 5855370 | 5855538 | . | . | gene_id | "XLOC_006432"; | transcript_id | "Novel_000144"; | exon_number | "8";  | gene_type | " |
| At_chr1 | Cufflinks | exon | 5855675 | 5855743 | . | . | gene_id | "XLOC_006432"; | transcript_id | "Novel_000144"; | exon_number | "9";  | gene_type | " |
| At_chr1 | Cufflinks | exon | 5855848 | 5856018 | . | . | gene_id | "XLOC_006432"; | transcript_id | "Novel_000144"; | exon_number | "10"; | gene_type | " |
| At_chr1 | Cufflinks | exon | 5856303 | 5856409 | . | . | gene_id | "XLOC_006432"; | transcript_id | "Novel_000144"; | exon_number | "11"; | gene_type | " |
| At_chr1 | Cufflinks | exon | 5857155 | 5857306 | . | . | gene_id | "XLOC_006432"; | transcript_id | "Novel_000144"; | exon_number | "12"; | gene_type | " |
| At_chr1 | Cufflinks | exon | 5857531 | 5857678 | . | . | gene_id | "XLOC_006432"; | transcript_id | "Novel_000144"; | exon_number | "13"; | gene_type | " |

|         |           |      |         |         |   |   |         |                |               |                 |             |       |           |   |
|---------|-----------|------|---------|---------|---|---|---------|----------------|---------------|-----------------|-------------|-------|-----------|---|
| At_chr1 | Cufflinks | exon | 5857766 | 5857860 | . | . | gene_id | "XLOC_006432"; | transcript_id | "Novel_000144"; | exon_number | "14"; | gene_type |   |
| At_chr1 | Cufflinks | exon | 5857965 | 5858088 | . | . | gene_id | "XLOC_006432"; | transcript_id | "Novel_000144"; | exon_number | "15"; | gene_type |   |
| At_chr1 | Cufflinks | exon | 5858277 | 5858437 | . | . | gene_id | "XLOC_006432"; | transcript_id | "Novel_000144"; | exon_number | "16"; | gene_type |   |
| At_chr1 | Cufflinks | exon | 5858517 | 5858598 | . | . | gene_id | "XLOC_006432"; | transcript_id | "Novel_000144"; | exon_number | "17"; | gene_type |   |
| At_chr1 | Cufflinks | exon | 5858680 | 5858771 | . | . | gene_id | "XLOC_006432"; | transcript_id | "Novel_000144"; | exon_number | "18"; | gene_type |   |
| At_chr1 | Cufflinks | exon | 5858861 | 5858980 | . | . | gene_id | "XLOC_006432"; | transcript_id | "Novel_000144"; | exon_number | "19"; | gene_type |   |
| At_chr1 | Cufflinks | exon | 5859042 | 5859128 | . | . | gene_id | "XLOC_006432"; | transcript_id | "Novel_000144"; | exon_number | "20"; | gene_type |   |
| At_chr1 | Cufflinks | exon | 5859502 | 5859551 | . | . | gene_id | "XLOC_006432"; | transcript_id | "Novel_000144"; | exon_number | "21"; | gene_type |   |
| At_chr1 | Cufflinks | exon | 5859635 | 5859716 | . | . | gene_id | "XLOC_006432"; | transcript_id | "Novel_000144"; | exon_number | "22"; | gene_type |   |
| At_chr1 | Cufflinks | exon | 5860547 | 5860607 | . | . | gene_id | "XLOC_006432"; | transcript_id | "Novel_000144"; | exon_number | "23"; | gene_type |   |
| At_chr1 | Cufflinks | exon | 5860693 | 5860745 | . | . | gene_id | "XLOC_006432"; | transcript_id | "Novel_000144"; | exon_number | "24"; | gene_type |   |
| At_chr1 | Cufflinks | exon | 5861446 | 5861774 | . | . | gene_id | "XLOC_006432"; | transcript_id | "Novel_000144"; | exon_number | "25"; | gene_type |   |
| At_chr1 | Cufflinks | exon | 5862168 | 5862285 | . | . | gene_id | "XLOC_006432"; | transcript_id | "Novel_000144"; | exon_number | "26"; | gene_type |   |
| At_chr1 | Cufflinks | exon | 5862359 | 5862484 | . | . | gene_id | "XLOC_006432"; | transcript_id | "Novel_000144"; | exon_number | "27"; | gene_type |   |
| At_chr1 | Cufflinks | exon | 5863120 | 5863276 | . | . | gene_id | "XLOC_006432"; | transcript_id | "Novel_000144"; | exon_number | "28"; | gene_type |   |
| At_chr1 | Cufflinks | exon | 5863393 | 5863469 | . | . | gene_id | "XLOC_006432"; | transcript_id | "Novel_000144"; | exon_number | "29"; | gene_type |   |
| At_chr1 | Cufflinks | exon | 5863540 | 5863677 | . | . | gene_id | "XLOC_006432"; | transcript_id | "Novel_000144"; | exon_number | "30"; | gene_type |   |
| At_chr1 | Cufflinks | exon | 5864552 | 5864678 | . | . | gene_id | "XLOC_006432"; | transcript_id | "Novel_000144"; | exon_number | "31"; | gene_type |   |
| At_chr1 | Cufflinks | exon | 5864946 | 5865037 | . | . | gene_id | "XLOC_006432"; | transcript_id | "Novel_000144"; | exon_number | "32"; | gene_type |   |
| At_chr1 | Cufflinks | exon | 5865124 | 5865216 | . | . | gene_id | "XLOC_006432"; | transcript_id | "Novel_000144"; | exon_number | "33"; | gene_type |   |
| At_chr1 | Cufflinks | exon | 5865353 | 5865472 | . | . | gene_id | "XLOC_006432"; | transcript_id | "Novel_000144"; | exon_number | "34"; | gene_type |   |
| At_chr1 | Cufflinks | exon | 5865716 | 5865823 | . | . | gene_id | "XLOC_006432"; | transcript_id | "Novel_000144"; | exon_number | "35"; | gene_type |   |
| At_chr1 | Cufflinks | exon | 5865932 | 5866013 | . | . | gene_id | "XLOC_006432"; | transcript_id | "Novel_000144"; | exon_number | "36"; | gene_type |   |
| At_chr1 | Cufflinks | exon | 5866132 | 5866253 | . | . | gene_id | "XLOC_006432"; | transcript_id | "Novel_000144"; | exon_number | "37"; | gene_type |   |
| At_chr1 | Cufflinks | exon | 5867117 | 5867217 | . | . | gene_id | "XLOC_006432"; | transcript_id | "Novel_000144"; | exon_number | "38"; | gene_type |   |
| At_chr1 | Cufflinks | exon | 5867560 | 5868068 | . | . | gene_id | "XLOC_006432"; | transcript_id | "Novel_000144"; | exon_number | "39"; | gene_type |   |
| At_chr1 | Cufflinks | exon | 5972004 | 5972257 | . | . | gene_id | "XLOC_006462"; | transcript_id | "Novel_000145"; | exon_number | "1";  | gene_type | " |
| At_chr1 | Cufflinks | exon | 6483855 | 6485611 | . | . | gene_id | "XLOC_006522"; | transcript_id | "Novel_000146"; | exon_number | "1";  | gene_type | " |
| At_chr1 | Cufflinks | exon | 6486034 | 6488027 | . | . | gene_id | "XLOC_006522"; | transcript_id | "Novel_000146"; | exon_number | "2";  | gene_type | " |
| At_chr1 | Cufflinks | exon | 6488161 | 6488510 | . | . | gene_id | "XLOC_006522"; | transcript_id | "Novel_000146"; | exon_number | "3";  | gene_type | " |
| At_chr1 | Cufflinks | exon | 6488921 | 6489109 | . | . | gene_id | "XLOC_006522"; | transcript_id | "Novel_000146"; | exon_number | "4";  | gene_type | " |
| At_chr1 | Cufflinks | exon | 6486088 | 6488027 | . | . | gene_id | "XLOC_006522"; | transcript_id | "Novel_000147"; | exon_number | "1";  | gene_type | " |
| At_chr1 | Cufflinks | exon | 6488161 | 6488510 | . | . | gene_id | "XLOC_006522"; | transcript_id | "Novel_000147"; | exon_number | "2";  | gene_type | " |
| At_chr1 | Cufflinks | exon | 6488921 | 6488974 | . | . | gene_id | "XLOC_006522"; | transcript_id | "Novel_000147"; | exon_number | "3";  | gene_type | " |
| At_chr1 | Cufflinks | exon | 6489186 | 6489353 | . | . | gene_id | "XLOC_006522"; | transcript_id | "Novel_000147"; | exon_number | "4";  | gene_type | " |





|         |           |      |          |          |   |   |   |         |                |               |                 |             |      |           |   |
|---------|-----------|------|----------|----------|---|---|---|---------|----------------|---------------|-----------------|-------------|------|-----------|---|
| At_chr1 | Cufflinks | exon | 12676510 | 12679466 | . | - | . | gene_id | "XLOC_007167"; | transcript_id | "Novel_000157"; | exon_number | "1"; | gene_type | " |
| At_chr1 | Cufflinks | exon | 12680268 | 12680603 | . | - | . | gene_id | "XLOC_007167"; | transcript_id | "Novel_000157"; | exon_number | "2"; | gene_type | " |
| At_chr1 | Cufflinks | exon | 15691276 | 15691866 | . | - | . | gene_id | "XLOC_007418"; | transcript_id | "Novel_000158"; | exon_number | "1"; | gene_type | " |
| At_chr1 | Cufflinks | exon | 15692240 | 15692368 | . | - | . | gene_id | "XLOC_007418"; | transcript_id | "Novel_000158"; | exon_number | "2"; | gene_type | " |
| At_chr1 | Cufflinks | exon | 15692702 | 15692822 | . | - | . | gene_id | "XLOC_007418"; | transcript_id | "Novel_000158"; | exon_number | "3"; | gene_type | " |
| At_chr1 | Cufflinks | exon | 15693167 | 15693168 | . | - | . | gene_id | "XLOC_007418"; | transcript_id | "Novel_000158"; | exon_number | "4"; | gene_type | " |
| At_chr1 | Cufflinks | exon | 15796786 | 15798128 | . | - | . | gene_id | "XLOC_007431"; | transcript_id | "Novel_000159"; | exon_number | "1"; | gene_type | " |
| At_chr1 | Cufflinks | exon | 15799067 | 15799102 | . | - | . | gene_id | "XLOC_007431"; | transcript_id | "Novel_000159"; | exon_number | "2"; | gene_type | " |
| At_chr1 | Cufflinks | exon | 15799198 | 15799337 | . | - | . | gene_id | "XLOC_007431"; | transcript_id | "Novel_000159"; | exon_number | "3"; | gene_type | " |
| At_chr1 | Cufflinks | exon | 15801324 | 15801480 | . | - | . | gene_id | "XLOC_007431"; | transcript_id | "Novel_000159"; | exon_number | "4"; | gene_type | " |
| At_chr1 | Cufflinks | exon | 15801632 | 15801802 | . | - | . | gene_id | "XLOC_007431"; | transcript_id | "Novel_000159"; | exon_number | "5"; | gene_type | " |
| At_chr1 | Cufflinks | exon | 15803381 | 15803628 | . | - | . | gene_id | "XLOC_007431"; | transcript_id | "Novel_000159"; | exon_number | "6"; | gene_type | " |
| At_chr1 | Cufflinks | exon | 15805860 | 15805966 | . | - | . | gene_id | "XLOC_007431"; | transcript_id | "Novel_000159"; | exon_number | "7"; | gene_type | " |
| At_chr1 | Cufflinks | exon | 15807698 | 15807800 | . | - | . | gene_id | "XLOC_007431"; | transcript_id | "Novel_000159"; | exon_number | "8"; | gene_type | " |
| At_chr1 | Cufflinks | exon | 15796797 | 15797812 | . | - | . | gene_id | "XLOC_007431"; | transcript_id | "Novel_000160"; | exon_number | "1"; | gene_type | " |
| At_chr1 | Cufflinks | exon | 15798032 | 15798128 | . | - | . | gene_id | "XLOC_007431"; | transcript_id | "Novel_000160"; | exon_number | "2"; | gene_type | " |
| At_chr1 | Cufflinks | exon | 15799067 | 15799102 | . | - | . | gene_id | "XLOC_007431"; | transcript_id | "Novel_000160"; | exon_number | "3"; | gene_type | " |
| At_chr1 | Cufflinks | exon | 15799198 | 15799337 | . | - | . | gene_id | "XLOC_007431"; | transcript_id | "Novel_000160"; | exon_number | "4"; | gene_type | " |
| At_chr1 | Cufflinks | exon | 15801324 | 15801480 | . | - | . | gene_id | "XLOC_007431"; | transcript_id | "Novel_000160"; | exon_number | "5"; | gene_type | " |
| At_chr1 | Cufflinks | exon | 15801632 | 15801802 | . | - | . | gene_id | "XLOC_007431"; | transcript_id | "Novel_000160"; | exon_number | "6"; | gene_type | " |
| At_chr1 | Cufflinks | exon | 15803381 | 15803628 | . | - | . | gene_id | "XLOC_007431"; | transcript_id | "Novel_000160"; | exon_number | "7"; | gene_type | " |
| At_chr1 | Cufflinks | exon | 15805860 | 15805966 | . | - | . | gene_id | "XLOC_007431"; | transcript_id | "Novel_000160"; | exon_number | "8"; | gene_type | " |
| At_chr1 | Cufflinks | exon | 15807698 | 15807799 | . | - | . | gene_id | "XLOC_007431"; | transcript_id | "Novel_000160"; | exon_number | "9"; | gene_type | " |
| At_chr1 | Cufflinks | exon | 15802007 | 15803628 | . | - | . | gene_id | "XLOC_007431"; | transcript_id | "Novel_000161"; | exon_number | "1"; | gene_type | " |
| At_chr1 | Cufflinks | exon | 15805860 | 15805966 | . | - | . | gene_id | "XLOC_007431"; | transcript_id | "Novel_000161"; | exon_number | "2"; | gene_type | " |
| At_chr1 | Cufflinks | exon | 15807698 | 15807839 | . | - | . | gene_id | "XLOC_007431"; | transcript_id | "Novel_000161"; | exon_number | "3"; | gene_type | " |
| At_chr1 | Cufflinks | exon | 16075674 | 16077245 | . | - | . | gene_id | "XLOC_007446"; | transcript_id | "Novel_000162"; | exon_number | "1"; | gene_type | " |
| At_chr1 | Cufflinks | exon | 16077878 | 16078268 | . | - | . | gene_id | "XLOC_007446"; | transcript_id | "Novel_000162"; | exon_number | "2"; | gene_type | " |
| At_chr1 | Cufflinks | exon | 23931280 | 23931575 | . | - | . | gene_id | "XLOC_007669"; | transcript_id | "Novel_000163"; | exon_number | "1"; | gene_type | " |
| At_chr1 | Cufflinks | exon | 23931964 | 23932097 | . | - | . | gene_id | "XLOC_007669"; | transcript_id | "Novel_000163"; | exon_number | "2"; | gene_type | " |
| At_chr1 | Cufflinks | exon | 23932179 | 23932352 | . | - | . | gene_id | "XLOC_007669"; | transcript_id | "Novel_000163"; | exon_number | "3"; | gene_type | " |
| At_chr1 | Cufflinks | exon | 36199426 | 36200174 | . | - | . | gene_id | "XLOC_008151"; | transcript_id | "Novel_000164"; | exon_number | "1"; | gene_type | " |
| At_chr1 | Cufflinks | exon | 36200252 | 36200323 | . | - | . | gene_id | "XLOC_008151"; | transcript_id | "Novel_000164"; | exon_number | "2"; | gene_type | " |
| At_chr1 | Cufflinks | exon | 36200585 | 36201097 | . | - | . | gene_id | "XLOC_008151"; | transcript_id | "Novel_000164"; | exon_number | "3"; | gene_type | " |
| At_chr1 | Cufflinks | exon | 36201254 | 36202155 | . | - | . | gene_id | "XLOC_008151"; | transcript_id | "Novel_000164"; | exon_number | "4"; | gene_type | " |



|         |           |      |          |          |   |   |   |         |                              |                             |                 |   |
|---------|-----------|------|----------|----------|---|---|---|---------|------------------------------|-----------------------------|-----------------|---|
| At_chr1 | Cufflinks | exon | 51732502 | 51732801 | . | - | . | gene_id | "XLOC_008823"; transcript_id | "Novel_000175"; exon_number | "1"; gene_type  | " |
| At_chr1 | Cufflinks | exon | 51733243 | 51733544 | . | - | . | gene_id | "XLOC_008823"; transcript_id | "Novel_000175"; exon_number | "2"; gene_type  | " |
| At_chr1 | Cufflinks | exon | 51733168 | 51733455 | . | - | . | gene_id | "XLOC_008823"; transcript_id | "Novel_000176"; exon_number | "1"; gene_type  | " |
| At_chr1 | Cufflinks | exon | 51733629 | 51733927 | . | - | . | gene_id | "XLOC_008823"; transcript_id | "Novel_000176"; exon_number | "2"; gene_type  | " |
| At_chr1 | Cufflinks | exon | 52767005 | 52767053 | . | - | . | gene_id | "XLOC_008970"; transcript_id | "Novel_000177"; exon_number | "1"; gene_type  | " |
| At_chr1 | Cufflinks | exon | 52767142 | 52767293 | . | - | . | gene_id | "XLOC_008970"; transcript_id | "Novel_000177"; exon_number | "2"; gene_type  | " |
| At_chr1 | Cufflinks | exon | 53194370 | 53195428 | . | - | . | gene_id | "XLOC_009033"; transcript_id | "Novel_000178"; exon_number | "1"; gene_type  | " |
| At_chr1 | Cufflinks | exon | 53197424 | 53198276 | . | - | . | gene_id | "XLOC_009033"; transcript_id | "Novel_000178"; exon_number | "2"; gene_type  | " |
| At_chr1 | Cufflinks | exon | 54154622 | 54155650 | . | - | . | gene_id | "XLOC_009137"; transcript_id | "Novel_000179"; exon_number | "1"; gene_type  | " |
| At_chr1 | Cufflinks | exon | 54155786 | 54155851 | . | - | . | gene_id | "XLOC_009137"; transcript_id | "Novel_000179"; exon_number | "2"; gene_type  | " |
| At_chr1 | Cufflinks | exon | 54155988 | 54156071 | . | - | . | gene_id | "XLOC_009137"; transcript_id | "Novel_000179"; exon_number | "3"; gene_type  | " |
| At_chr1 | Cufflinks | exon | 54156287 | 54156373 | . | - | . | gene_id | "XLOC_009137"; transcript_id | "Novel_000179"; exon_number | "4"; gene_type  | " |
| At_chr1 | Cufflinks | exon | 54156716 | 54156825 | . | - | . | gene_id | "XLOC_009137"; transcript_id | "Novel_000179"; exon_number | "5"; gene_type  | " |
| At_chr1 | Cufflinks | exon | 54157218 | 54157251 | . | - | . | gene_id | "XLOC_009137"; transcript_id | "Novel_000179"; exon_number | "6"; gene_type  | " |
| At_chr1 | Cufflinks | exon | 54157639 | 54157775 | . | - | . | gene_id | "XLOC_009137"; transcript_id | "Novel_000179"; exon_number | "7"; gene_type  | " |
| At_chr1 | Cufflinks | exon | 54157923 | 54157992 | . | - | . | gene_id | "XLOC_009137"; transcript_id | "Novel_000179"; exon_number | "8"; gene_type  | " |
| At_chr1 | Cufflinks | exon | 54158103 | 54158177 | . | - | . | gene_id | "XLOC_009137"; transcript_id | "Novel_000179"; exon_number | "9"; gene_type  | " |
| At_chr1 | Cufflinks | exon | 54158516 | 54158630 | . | - | . | gene_id | "XLOC_009137"; transcript_id | "Novel_000179"; exon_number | "10"; gene_type | " |
| At_chr1 | Cufflinks | exon | 54158896 | 54159274 | . | - | . | gene_id | "XLOC_009137"; transcript_id | "Novel_000179"; exon_number | "11"; gene_type | " |
| At_chr1 | Cufflinks | exon | 54154662 | 54155650 | . | - | . | gene_id | "XLOC_009137"; transcript_id | "Novel_000180"; exon_number | "1"; gene_type  | " |
| At_chr1 | Cufflinks | exon | 54155786 | 54155851 | . | - | . | gene_id | "XLOC_009137"; transcript_id | "Novel_000180"; exon_number | "2"; gene_type  | " |
| At_chr1 | Cufflinks | exon | 54155988 | 54156071 | . | - | . | gene_id | "XLOC_009137"; transcript_id | "Novel_000180"; exon_number | "3"; gene_type  | " |
| At_chr1 | Cufflinks | exon | 54156287 | 54157176 | . | - | . | gene_id | "XLOC_009137"; transcript_id | "Novel_000180"; exon_number | "4"; gene_type  | " |
| At_chr1 | Cufflinks | exon | 54158074 | 54158630 | . | - | . | gene_id | "XLOC_009137"; transcript_id | "Novel_000181"; exon_number | "1"; gene_type  | " |
| At_chr1 | Cufflinks | exon | 54158896 | 54159259 | . | - | . | gene_id | "XLOC_009137"; transcript_id | "Novel_000181"; exon_number | "2"; gene_type  | " |
| At_chr1 | Cufflinks | exon | 54249218 | 54250572 | . | - | . | gene_id | "XLOC_009141"; transcript_id | "Novel_000182"; exon_number | "1"; gene_type  | " |
| At_chr1 | Cufflinks | exon | 54250648 | 54250701 | . | - | . | gene_id | "XLOC_009141"; transcript_id | "Novel_000182"; exon_number | "2"; gene_type  | " |
| At_chr1 | Cufflinks | exon | 54250825 | 54251145 | . | - | . | gene_id | "XLOC_009141"; transcript_id | "Novel_000182"; exon_number | "3"; gene_type  | " |
| At_chr1 | Cufflinks | exon | 54253705 | 54253715 | . | - | . | gene_id | "XLOC_009141"; transcript_id | "Novel_000183"; exon_number | "1"; gene_type  | " |
| At_chr1 | Cufflinks | exon | 54254222 | 54254272 | . | - | . | gene_id | "XLOC_009141"; transcript_id | "Novel_000183"; exon_number | "2"; gene_type  | " |
| At_chr1 | Cufflinks | exon | 54254355 | 54254465 | . | - | . | gene_id | "XLOC_009141"; transcript_id | "Novel_000183"; exon_number | "3"; gene_type  | " |
| At_chr1 | Cufflinks | exon | 54254757 | 54254811 | . | - | . | gene_id | "XLOC_009141"; transcript_id | "Novel_000183"; exon_number | "4"; gene_type  | " |
| At_chr1 | Cufflinks | exon | 54255038 | 54255157 | . | - | . | gene_id | "XLOC_009141"; transcript_id | "Novel_000183"; exon_number | "5"; gene_type  | " |
| At_chr1 | Cufflinks | exon | 54255284 | 54255381 | . | - | . | gene_id | "XLOC_009141"; transcript_id | "Novel_000183"; exon_number | "6"; gene_type  | " |
| At_chr1 | Cufflinks | exon | 54255514 | 54255628 | . | - | . | gene_id | "XLOC_009141"; transcript_id | "Novel_000183"; exon_number | "7"; gene_type  | " |

|         |           |      |          |          |   |   |   |         |                |               |                 |             |      |           |   |
|---------|-----------|------|----------|----------|---|---|---|---------|----------------|---------------|-----------------|-------------|------|-----------|---|
| At_chr1 | Cufflinks | exon | 54255958 | 54256329 | . | - | . | gene_id | "XLOC_009141"; | transcript_id | "Novel_000183"; | exon_number | "8"; | gene_type | " |
| At_chr1 | Cufflinks | exon | 54254179 | 54254465 | . | - | . | gene_id | "XLOC_009141"; | transcript_id | "Novel_000184"; | exon_number | "1"; | gene_type | " |
| At_chr1 | Cufflinks | exon | 54254757 | 54254811 | . | - | . | gene_id | "XLOC_009141"; | transcript_id | "Novel_000184"; | exon_number | "2"; | gene_type | " |
| At_chr1 | Cufflinks | exon | 54255038 | 54255770 | . | - | . | gene_id | "XLOC_009141"; | transcript_id | "Novel_000184"; | exon_number | "3"; | gene_type | " |
| At_chr1 | Cufflinks | exon | 54254532 | 54255157 | . | - | . | gene_id | "XLOC_009141"; | transcript_id | "Novel_000185"; | exon_number | "1"; | gene_type | " |
| At_chr1 | Cufflinks | exon | 54255284 | 54255381 | . | - | . | gene_id | "XLOC_009141"; | transcript_id | "Novel_000185"; | exon_number | "2"; | gene_type | " |
| At_chr1 | Cufflinks | exon | 54255514 | 54255628 | . | - | . | gene_id | "XLOC_009141"; | transcript_id | "Novel_000185"; | exon_number | "3"; | gene_type | " |
| At_chr1 | Cufflinks | exon | 54255958 | 54256267 | . | - | . | gene_id | "XLOC_009141"; | transcript_id | "Novel_000185"; | exon_number | "4"; | gene_type | " |
| At_chr1 | Cufflinks | exon | 54254845 | 54255381 | . | - | . | gene_id | "XLOC_009141"; | transcript_id | "Novel_000186"; | exon_number | "1"; | gene_type | " |
| At_chr1 | Cufflinks | exon | 54255514 | 54255628 | . | - | . | gene_id | "XLOC_009141"; | transcript_id | "Novel_000186"; | exon_number | "2"; | gene_type | " |
| At_chr1 | Cufflinks | exon | 54255958 | 54256288 | . | - | . | gene_id | "XLOC_009141"; | transcript_id | "Novel_000186"; | exon_number | "3"; | gene_type | " |
| At_chr1 | Cufflinks | exon | 54300114 | 54300368 | . | - | . | gene_id | "XLOC_009145"; | transcript_id | "Novel_000187"; | exon_number | "1"; | gene_type | " |
| At_chr1 | Cufflinks | exon | 54300459 | 54300794 | . | - | . | gene_id | "XLOC_009145"; | transcript_id | "Novel_000187"; | exon_number | "2"; | gene_type | " |
| At_chr1 | Cufflinks | exon | 54615848 | 54616989 | . | - | . | gene_id | "XLOC_009183"; | transcript_id | "Novel_000188"; | exon_number | "1"; | gene_type | " |
| At_chr1 | Cufflinks | exon | 54617095 | 54617158 | . | - | . | gene_id | "XLOC_009183"; | transcript_id | "Novel_000188"; | exon_number | "2"; | gene_type | " |
| At_chr1 | Cufflinks | exon | 54617270 | 54617379 | . | - | . | gene_id | "XLOC_009183"; | transcript_id | "Novel_000188"; | exon_number | "3"; | gene_type | " |
| At_chr1 | Cufflinks | exon | 54617499 | 54617586 | . | - | . | gene_id | "XLOC_009183"; | transcript_id | "Novel_000188"; | exon_number | "4"; | gene_type | " |
| At_chr1 | Cufflinks | exon | 54618221 | 54618721 | . | - | . | gene_id | "XLOC_009183"; | transcript_id | "Novel_000188"; | exon_number | "5"; | gene_type | " |
| At_chr1 | Cufflinks | exon | 54615904 | 54616639 | . | - | . | gene_id | "XLOC_009183"; | transcript_id | "Novel_000189"; | exon_number | "1"; | gene_type | " |
| At_chr1 | Cufflinks | exon | 54616725 | 54616869 | . | - | . | gene_id | "XLOC_009183"; | transcript_id | "Novel_000189"; | exon_number | "2"; | gene_type | " |
| At_chr1 | Cufflinks | exon | 54616892 | 54617158 | . | - | . | gene_id | "XLOC_009183"; | transcript_id | "Novel_000190"; | exon_number | "1"; | gene_type | " |
| At_chr1 | Cufflinks | exon | 54617270 | 54617379 | . | - | . | gene_id | "XLOC_009183"; | transcript_id | "Novel_000190"; | exon_number | "2"; | gene_type | " |
| At_chr1 | Cufflinks | exon | 54617499 | 54617586 | . | - | . | gene_id | "XLOC_009183"; | transcript_id | "Novel_000190"; | exon_number | "3"; | gene_type | " |
| At_chr1 | Cufflinks | exon | 54618221 | 54618710 | . | - | . | gene_id | "XLOC_009183"; | transcript_id | "Novel_000190"; | exon_number | "4"; | gene_type | " |
| At_chr1 | Cufflinks | exon | 56371593 | 56372200 | . | - | . | gene_id | "XLOC_009313"; | transcript_id | "Novel_000191"; | exon_number | "1"; | gene_type | " |
| At_chr1 | Cufflinks | exon | 56372466 | 56372546 | . | - | . | gene_id | "XLOC_009313"; | transcript_id | "Novel_000191"; | exon_number | "2"; | gene_type | " |
| At_chr1 | Cufflinks | exon | 56373478 | 56373627 | . | - | . | gene_id | "XLOC_009313"; | transcript_id | "Novel_000191"; | exon_number | "3"; | gene_type | " |
| At_chr1 | Cufflinks | exon | 56374049 | 56374117 | . | - | . | gene_id | "XLOC_009313"; | transcript_id | "Novel_000191"; | exon_number | "4"; | gene_type | " |
| At_chr1 | Cufflinks | exon | 56374210 | 56374250 | . | - | . | gene_id | "XLOC_009313"; | transcript_id | "Novel_000191"; | exon_number | "5"; | gene_type | " |
| At_chr1 | Cufflinks | exon | 56374339 | 56374705 | . | - | . | gene_id | "XLOC_009313"; | transcript_id | "Novel_000191"; | exon_number | "6"; | gene_type | " |
| At_chr1 | Cufflinks | exon | 56371769 | 56374250 | . | - | . | gene_id | "XLOC_009313"; | transcript_id | "Novel_000192"; | exon_number | "1"; | gene_type | " |
| At_chr1 | Cufflinks | exon | 56374339 | 56374739 | . | - | . | gene_id | "XLOC_009313"; | transcript_id | "Novel_000192"; | exon_number | "2"; | gene_type | " |
| At_chr1 | Cufflinks | exon | 56371801 | 56372546 | . | - | . | gene_id | "XLOC_009313"; | transcript_id | "Novel_000193"; | exon_number | "1"; | gene_type | " |
| At_chr1 | Cufflinks | exon | 56373478 | 56373627 | . | - | . | gene_id | "XLOC_009313"; | transcript_id | "Novel_000193"; | exon_number | "2"; | gene_type | " |
| At_chr1 | Cufflinks | exon | 56374049 | 56374117 | . | - | . | gene_id | "XLOC_009313"; | transcript_id | "Novel_000193"; | exon_number | "3"; | gene_type | " |

|         |           |      |          |          |   |   |   |         |                |               |                 |             |      |           |   |
|---------|-----------|------|----------|----------|---|---|---|---------|----------------|---------------|-----------------|-------------|------|-----------|---|
| At_chr1 | Cufflinks | exon | 56374210 | 56374250 | . | - | . | gene_id | "XLOC_009313"; | transcript_id | "Novel_000193"; | exon_number | "4"; | gene_type | " |
| At_chr1 | Cufflinks | exon | 56374339 | 56374705 | . | - | . | gene_id | "XLOC_009313"; | transcript_id | "Novel_000193"; | exon_number | "5"; | gene_type | " |
| At_chr1 | Cufflinks | exon | 56371801 | 56372200 | . | - | . | gene_id | "XLOC_009313"; | transcript_id | "Novel_000194"; | exon_number | "1"; | gene_type | " |
| At_chr1 | Cufflinks | exon | 56372466 | 56372546 | . | - | . | gene_id | "XLOC_009313"; | transcript_id | "Novel_000194"; | exon_number | "2"; | gene_type | " |
| At_chr1 | Cufflinks | exon | 56373478 | 56373627 | . | - | . | gene_id | "XLOC_009313"; | transcript_id | "Novel_000194"; | exon_number | "3"; | gene_type | " |
| At_chr1 | Cufflinks | exon | 56374049 | 56374112 | . | - | . | gene_id | "XLOC_009313"; | transcript_id | "Novel_000194"; | exon_number | "4"; | gene_type | " |
| At_chr1 | Cufflinks | exon | 56374210 | 56374250 | . | - | . | gene_id | "XLOC_009313"; | transcript_id | "Novel_000194"; | exon_number | "5"; | gene_type | " |
| At_chr1 | Cufflinks | exon | 56374339 | 56374705 | . | - | . | gene_id | "XLOC_009313"; | transcript_id | "Novel_000194"; | exon_number | "6"; | gene_type | " |
| At_chr1 | Cufflinks | exon | 57270195 | 57283857 | . | - | . | gene_id | "XLOC_009405"; | transcript_id | "Novel_000195"; | exon_number | "1"; | gene_type | " |
| At_chr1 | Cufflinks | exon | 57283936 | 57284159 | . | - | . | gene_id | "XLOC_009405"; | transcript_id | "Novel_000195"; | exon_number | "2"; | gene_type | " |
| At_chr1 | Cufflinks | exon | 57284316 | 57284440 | . | - | . | gene_id | "XLOC_009405"; | transcript_id | "Novel_000195"; | exon_number | "3"; | gene_type | " |
| At_chr1 | Cufflinks | exon | 57284747 | 57284934 | . | - | . | gene_id | "XLOC_009405"; | transcript_id | "Novel_000195"; | exon_number | "4"; | gene_type | " |
| At_chr1 | Cufflinks | exon | 61493157 | 61493827 | . | - | . | gene_id | "XLOC_009611"; | transcript_id | "Novel_000196"; | exon_number | "1"; | gene_type | " |
| At_chr1 | Cufflinks | exon | 61494499 | 61495226 | . | - | . | gene_id | "XLOC_009611"; | transcript_id | "Novel_000196"; | exon_number | "2"; | gene_type | " |
| At_chr1 | Cufflinks | exon | 61496219 | 61496751 | . | - | . | gene_id | "XLOC_009614"; | transcript_id | "Novel_000197"; | exon_number | "1"; | gene_type | " |
| At_chr1 | Cufflinks | exon | 61496833 | 61497072 | . | - | . | gene_id | "XLOC_009614"; | transcript_id | "Novel_000197"; | exon_number | "2"; | gene_type | " |
| At_chr1 | Cufflinks | exon | 61497203 | 61497266 | . | - | . | gene_id | "XLOC_009614"; | transcript_id | "Novel_000197"; | exon_number | "3"; | gene_type | " |
| At_chr1 | Cufflinks | exon | 61497367 | 61498334 | . | - | . | gene_id | "XLOC_009614"; | transcript_id | "Novel_000197"; | exon_number | "4"; | gene_type | " |
| At_chr1 | Cufflinks | exon | 61498509 | 61498673 | . | - | . | gene_id | "XLOC_009614"; | transcript_id | "Novel_000197"; | exon_number | "5"; | gene_type | " |
| At_chr1 | Cufflinks | exon | 61498751 | 61499386 | . | - | . | gene_id | "XLOC_009614"; | transcript_id | "Novel_000197"; | exon_number | "6"; | gene_type | " |
| At_chr1 | Cufflinks | exon | 61499482 | 61499568 | . | - | . | gene_id | "XLOC_009614"; | transcript_id | "Novel_000197"; | exon_number | "7"; | gene_type | " |
| At_chr1 | Cufflinks | exon | 61499778 | 61502293 | . | - | . | gene_id | "XLOC_009614"; | transcript_id | "Novel_000197"; | exon_number | "8"; | gene_type | " |
| At_chr1 | Cufflinks | exon | 61529255 | 61529791 | . | - | . | gene_id | "XLOC_009620"; | transcript_id | "Novel_000198"; | exon_number | "1"; | gene_type | " |
| At_chr1 | Cufflinks | exon | 61529868 | 61529954 | . | - | . | gene_id | "XLOC_009620"; | transcript_id | "Novel_000198"; | exon_number | "2"; | gene_type | " |
| At_chr1 | Cufflinks | exon | 61530114 | 61530629 | . | - | . | gene_id | "XLOC_009620"; | transcript_id | "Novel_000198"; | exon_number | "3"; | gene_type | " |
| At_chr1 | Cufflinks | exon | 61624148 | 61624762 | . | - | . | gene_id | "XLOC_009626"; | transcript_id | "Novel_000199"; | exon_number | "1"; | gene_type | " |
| At_chr1 | Cufflinks | exon | 61625053 | 61626255 | . | - | . | gene_id | "XLOC_009626"; | transcript_id | "Novel_000199"; | exon_number | "2"; | gene_type | " |
| At_chr1 | Cufflinks | exon | 61626678 | 61626742 | . | - | . | gene_id | "XLOC_009626"; | transcript_id | "Novel_000199"; | exon_number | "3"; | gene_type | " |
| At_chr1 | Cufflinks | exon | 61626847 | 61626923 | . | - | . | gene_id | "XLOC_009626"; | transcript_id | "Novel_000199"; | exon_number | "4"; | gene_type | " |
| At_chr1 | Cufflinks | exon | 61627202 | 61627335 | . | - | . | gene_id | "XLOC_009626"; | transcript_id | "Novel_000199"; | exon_number | "5"; | gene_type | " |
| At_chr1 | Cufflinks | exon | 61624148 | 61624762 | . | - | . | gene_id | "XLOC_009626"; | transcript_id | "Novel_000200"; | exon_number | "1"; | gene_type | " |
| At_chr1 | Cufflinks | exon | 61625053 | 61625212 | . | - | . | gene_id | "XLOC_009626"; | transcript_id | "Novel_000200"; | exon_number | "2"; | gene_type | " |
| At_chr1 | Cufflinks | exon | 61625378 | 61625453 | . | - | . | gene_id | "XLOC_009626"; | transcript_id | "Novel_000200"; | exon_number | "3"; | gene_type | " |
| At_chr1 | Cufflinks | exon | 61626209 | 61626255 | . | - | . | gene_id | "XLOC_009626"; | transcript_id | "Novel_000200"; | exon_number | "4"; | gene_type | " |
| At_chr1 | Cufflinks | exon | 61626678 | 61626742 | . | - | . | gene_id | "XLOC_009626"; | transcript_id | "Novel_000200"; | exon_number | "5"; | gene_type | " |





|         |           |      |          |          |   |   |   |         |                |               |                 |             |       |           |   |
|---------|-----------|------|----------|----------|---|---|---|---------|----------------|---------------|-----------------|-------------|-------|-----------|---|
| At_chr1 | Cufflinks | exon | 80693811 | 80693904 | . | - | . | gene_id | "XLOC_010249"; | transcript_id | "Novel_000216"; | exon_number | "2";  | gene_type | " |
| At_chr1 | Cufflinks | exon | 80694010 | 80695210 | . | - | . | gene_id | "XLOC_010249"; | transcript_id | "Novel_000216"; | exon_number | "3";  | gene_type | " |
| At_chr1 | Cufflinks | exon | 80876890 | 80878576 | . | - | . | gene_id | "XLOC_010286"; | transcript_id | "Novel_000217"; | exon_number | "1";  | gene_type | " |
| At_chr1 | Cufflinks | exon | 80880347 | 80881357 | . | - | . | gene_id | "XLOC_010286"; | transcript_id | "Novel_000217"; | exon_number | "2";  | gene_type | " |
| At_chr1 | Cufflinks | exon | 86926333 | 86928695 | . | - | . | gene_id | "XLOC_010632"; | transcript_id | "Novel_000218"; | exon_number | "1";  | gene_type | " |
| At_chr1 | Cufflinks | exon | 86928782 | 86928810 | . | - | . | gene_id | "XLOC_010632"; | transcript_id | "Novel_000218"; | exon_number | "2";  | gene_type | " |
| At_chr1 | Cufflinks | exon | 86926632 | 86927321 | . | - | . | gene_id | "XLOC_010632"; | transcript_id | "Novel_000219"; | exon_number | "1";  | gene_type | " |
| At_chr1 | Cufflinks | exon | 86928396 | 86928695 | . | - | . | gene_id | "XLOC_010632"; | transcript_id | "Novel_000219"; | exon_number | "2";  | gene_type | " |
| At_chr1 | Cufflinks | exon | 86928782 | 86928810 | . | - | . | gene_id | "XLOC_010632"; | transcript_id | "Novel_000219"; | exon_number | "3";  | gene_type | " |
| At_chr1 | Cufflinks | exon | 87586805 | 87587018 | . | - | . | gene_id | "XLOC_010670"; | transcript_id | "Novel_000220"; | exon_number | "1";  | gene_type | " |
| At_chr1 | Cufflinks | exon | 87767598 | 87767667 | . | - | . | gene_id | "XLOC_010689"; | transcript_id | "Novel_000221"; | exon_number | "1";  | gene_type | " |
| At_chr1 | Cufflinks | exon | 87769158 | 87769300 | . | - | . | gene_id | "XLOC_010689"; | transcript_id | "Novel_000221"; | exon_number | "2";  | gene_type | " |
| At_chr1 | Cufflinks | exon | 92000764 | 92001307 | . | - | . | gene_id | "XLOC_010829"; | transcript_id | "Novel_000222"; | exon_number | "1";  | gene_type | " |
| At_chr1 | Cufflinks | exon | 92001413 | 92001493 | . | - | . | gene_id | "XLOC_010829"; | transcript_id | "Novel_000222"; | exon_number | "2";  | gene_type | " |
| At_chr1 | Cufflinks | exon | 92001574 | 92001991 | . | - | . | gene_id | "XLOC_010829"; | transcript_id | "Novel_000222"; | exon_number | "3";  | gene_type | " |
| At_chr1 | Cufflinks | exon | 92002196 | 92002296 | . | - | . | gene_id | "XLOC_010829"; | transcript_id | "Novel_000222"; | exon_number | "4";  | gene_type | " |
| At_chr1 | Cufflinks | exon | 92002554 | 92002631 | . | - | . | gene_id | "XLOC_010829"; | transcript_id | "Novel_000222"; | exon_number | "5";  | gene_type | " |
| At_chr1 | Cufflinks | exon | 92002780 | 92002875 | . | - | . | gene_id | "XLOC_010829"; | transcript_id | "Novel_000222"; | exon_number | "6";  | gene_type | " |
| At_chr1 | Cufflinks | exon | 92002970 | 92003069 | . | - | . | gene_id | "XLOC_010829"; | transcript_id | "Novel_000222"; | exon_number | "7";  | gene_type | " |
| At_chr1 | Cufflinks | exon | 92003170 | 92003219 | . | - | . | gene_id | "XLOC_010829"; | transcript_id | "Novel_000222"; | exon_number | "8";  | gene_type | " |
| At_chr1 | Cufflinks | exon | 92003300 | 92003401 | . | - | . | gene_id | "XLOC_010829"; | transcript_id | "Novel_000222"; | exon_number | "9";  | gene_type | " |
| At_chr1 | Cufflinks | exon | 92003486 | 92003563 | . | - | . | gene_id | "XLOC_010829"; | transcript_id | "Novel_000222"; | exon_number | "10"; | gene_type | " |
| At_chr1 | Cufflinks | exon | 92003696 | 92003962 | . | - | . | gene_id | "XLOC_010829"; | transcript_id | "Novel_000222"; | exon_number | "11"; | gene_type | " |
| At_chr1 | Cufflinks | exon | 92004072 | 92004171 | . | - | . | gene_id | "XLOC_010829"; | transcript_id | "Novel_000222"; | exon_number | "12"; | gene_type | " |
| At_chr1 | Cufflinks | exon | 92004297 | 92004522 | . | - | . | gene_id | "XLOC_010829"; | transcript_id | "Novel_000222"; | exon_number | "13"; | gene_type | " |
| At_chr1 | Cufflinks | exon | 92004622 | 92004732 | . | - | . | gene_id | "XLOC_010829"; | transcript_id | "Novel_000222"; | exon_number | "14"; | gene_type | " |
| At_chr1 | Cufflinks | exon | 92004824 | 92004931 | . | - | . | gene_id | "XLOC_010829"; | transcript_id | "Novel_000222"; | exon_number | "15"; | gene_type | " |
| At_chr1 | Cufflinks | exon | 92156108 | 92157877 | . | - | . | gene_id | "XLOC_010856"; | transcript_id | "Novel_000223"; | exon_number | "1";  | gene_type | " |
| At_chr1 | Cufflinks | exon | 92158022 | 92160608 | . | - | . | gene_id | "XLOC_010856"; | transcript_id | "Novel_000223"; | exon_number | "2";  | gene_type | " |
| At_chr1 | Cufflinks | exon | 96175510 | 96175687 | . | - | . | gene_id | "XLOC_011010"; | transcript_id | "Novel_000224"; | exon_number | "1";  | gene_type | " |
| At_chr1 | Cufflinks | exon | 96175777 | 96176003 | . | - | . | gene_id | "XLOC_011010"; | transcript_id | "Novel_000224"; | exon_number | "2";  | gene_type | " |
| At_chr1 | Cufflinks | exon | 1.01E+08 | 1.01E+08 | . | - | . | gene_id | "XLOC_011175"; | transcript_id | "Novel_000225"; | exon_number | "1";  | gene_type | " |
| At_chr1 | Cufflinks | exon | 1.01E+08 | 1.01E+08 | . | - | . | gene_id | "XLOC_011175"; | transcript_id | "Novel_000225"; | exon_number | "2";  | gene_type | " |
| At_chr1 | Cufflinks | exon | 1.04E+08 | 1.04E+08 | . | - | . | gene_id | "XLOC_011263"; | transcript_id | "Novel_000226"; | exon_number | "1";  | gene_type | " |
| At_chr1 | Cufflinks | exon | 1.05E+08 | 1.05E+08 | . | - | . | gene_id | "XLOC_011342"; | transcript_id | "Novel_000227"; | exon_number | "1";  | gene_type | " |



|          |           |      |          |          |   |   |   |         |                |               |                 |             |      |           |   |
|----------|-----------|------|----------|----------|---|---|---|---------|----------------|---------------|-----------------|-------------|------|-----------|---|
| At_chr1  | Cufflinks | exon | 1.05E+08 | 1.05E+08 | . | - | . | gene_id | "XLOC_011342"; | transcript_id | "Novel_000227"; | exon_number | "2"; | gene_type | " |
| At_chr1  | Cufflinks | exon | 1.06E+08 | 1.06E+08 | . | - | . | gene_id | "XLOC_011395"; | transcript_id | "Novel_000228"; | exon_number | "1"; | gene_type | " |
| At_chr1  | Cufflinks | exon | 1.06E+08 | 1.06E+08 | . | - | . | gene_id | "XLOC_011395"; | transcript_id | "Novel_000228"; | exon_number | "2"; | gene_type | " |
| At_chr1  | Cufflinks | exon | 1.06E+08 | 1.06E+08 | . | - | . | gene_id | "XLOC_011462"; | transcript_id | "Novel_000229"; | exon_number | "1"; | gene_type | " |
| At_chr1  | Cufflinks | exon | 1.06E+08 | 1.06E+08 | . | - | . | gene_id | "XLOC_011462"; | transcript_id | "Novel_000229"; | exon_number | "2"; | gene_type | " |
| At_chr1  | Cufflinks | exon | 1.06E+08 | 1.06E+08 | . | - | . | gene_id | "XLOC_011462"; | transcript_id | "Novel_000229"; | exon_number | "3"; | gene_type | " |
| At_chr1  | Cufflinks | exon | 1.06E+08 | 1.06E+08 | . | - | . | gene_id | "XLOC_011462"; | transcript_id | "Novel_000230"; | exon_number | "1"; | gene_type | " |
| At_chr1  | Cufflinks | exon | 1.06E+08 | 1.06E+08 | . | - | . | gene_id | "XLOC_011462"; | transcript_id | "Novel_000230"; | exon_number | "2"; | gene_type | " |
| At_chr10 | Cufflinks | exon | 2838080  | 2838767  | . | + | . | gene_id | "XLOC_011903"; | transcript_id | "Novel_000231"; | exon_number | "1"; | gene_type | " |
| At_chr10 | Cufflinks | exon | 2838891  | 2839394  | . | + | . | gene_id | "XLOC_011903"; | transcript_id | "Novel_000231"; | exon_number | "2"; | gene_type | " |
| At_chr10 | Cufflinks | exon | 2839445  | 2840576  | . | + | . | gene_id | "XLOC_011903"; | transcript_id | "Novel_000231"; | exon_number | "3"; | gene_type | " |
| At_chr10 | Cufflinks | exon | 5376182  | 5376553  | . | + | . | gene_id | "XLOC_012064"; | transcript_id | "Novel_000232"; | exon_number | "1"; | gene_type | " |
| At_chr10 | Cufflinks | exon | 5376636  | 5376759  | . | + | . | gene_id | "XLOC_012064"; | transcript_id | "Novel_000232"; | exon_number | "2"; | gene_type | " |
| At_chr10 | Cufflinks | exon | 5379043  | 5379386  | . | + | . | gene_id | "XLOC_012064"; | transcript_id | "Novel_000232"; | exon_number | "3"; | gene_type | " |
| At_chr10 | Cufflinks | exon | 5376182  | 5376553  | . | + | . | gene_id | "XLOC_012064"; | transcript_id | "Novel_000233"; | exon_number | "1"; | gene_type | " |
| At_chr10 | Cufflinks | exon | 5376636  | 5376759  | . | + | . | gene_id | "XLOC_012064"; | transcript_id | "Novel_000233"; | exon_number | "2"; | gene_type | " |
| At_chr10 | Cufflinks | exon | 5377199  | 5377368  | . | + | . | gene_id | "XLOC_012064"; | transcript_id | "Novel_000233"; | exon_number | "3"; | gene_type | " |
| At_chr10 | Cufflinks | exon | 5379043  | 5379386  | . | + | . | gene_id | "XLOC_012064"; | transcript_id | "Novel_000233"; | exon_number | "4"; | gene_type | " |
| At_chr10 | Cufflinks | exon | 5376206  | 5377368  | . | + | . | gene_id | "XLOC_012064"; | transcript_id | "Novel_000234"; | exon_number | "1"; | gene_type | " |
| At_chr10 | Cufflinks | exon | 5379043  | 5379373  | . | + | . | gene_id | "XLOC_012064"; | transcript_id | "Novel_000234"; | exon_number | "2"; | gene_type | " |
| At_chr10 | Cufflinks | exon | 9191354  | 9191519  | . | + | . | gene_id | "XLOC_012190"; | transcript_id | "Novel_000235"; | exon_number | "1"; | gene_type | " |
| At_chr10 | Cufflinks | exon | 9191634  | 9192675  | . | + | . | gene_id | "XLOC_012190"; | transcript_id | "Novel_000235"; | exon_number | "2"; | gene_type | " |
| At_chr10 | Cufflinks | exon | 10231587 | 10231817 | . | + | . | gene_id | "XLOC_012210"; | transcript_id | "Novel_000236"; | exon_number | "1"; | gene_type | " |
| At_chr10 | Cufflinks | exon | 20887068 | 20887419 | . | + | . | gene_id | "XLOC_012608"; | transcript_id | "Novel_000237"; | exon_number | "1"; | gene_type | " |
| At_chr10 | Cufflinks | exon | 20887744 | 20887811 | . | + | . | gene_id | "XLOC_012608"; | transcript_id | "Novel_000237"; | exon_number | "2"; | gene_type | " |
| At_chr10 | Cufflinks | exon | 20887904 | 20889311 | . | + | . | gene_id | "XLOC_012608"; | transcript_id | "Novel_000237"; | exon_number | "3"; | gene_type | " |
| At_chr10 | Cufflinks | exon | 21765902 | 21766125 | . | + | . | gene_id | "XLOC_012671"; | transcript_id | "Novel_000238"; | exon_number | "1"; | gene_type | " |
| At_chr10 | Cufflinks | exon | 22731588 | 22731802 | . | + | . | gene_id | "XLOC_012706"; | transcript_id | "Novel_000239"; | exon_number | "1"; | gene_type | " |
| At_chr10 | Cufflinks | exon | 22732654 | 22732717 | . | + | . | gene_id | "XLOC_012706"; | transcript_id | "Novel_000239"; | exon_number | "2"; | gene_type | " |
| At_chr10 | Cufflinks | exon | 22733192 | 22733293 | . | + | . | gene_id | "XLOC_012706"; | transcript_id | "Novel_000239"; | exon_number | "3"; | gene_type | " |
| At_chr10 | Cufflinks | exon | 22734113 | 22734191 | . | + | . | gene_id | "XLOC_012706"; | transcript_id | "Novel_000239"; | exon_number | "4"; | gene_type | " |
| At_chr10 | Cufflinks | exon | 22734638 | 22734737 | . | + | . | gene_id | "XLOC_012706"; | transcript_id | "Novel_000239"; | exon_number | "5"; | gene_type | " |
| At_chr10 | Cufflinks | exon | 22735936 | 22736810 | . | + | . | gene_id | "XLOC_012706"; | transcript_id | "Novel_000239"; | exon_number | "6"; | gene_type | " |
| At_chr10 | Cufflinks | exon | 22731599 | 22731802 | . | + | . | gene_id | "XLOC_012706"; | transcript_id | "Novel_000240"; | exon_number | "1"; | gene_type | " |
| At_chr10 | Cufflinks | exon | 22732654 | 22732764 | . | + | . | gene_id | "XLOC_012706"; | transcript_id | "Novel_000240"; | exon_number | "2"; | gene_type | " |





|          |           |      |          |          |   |   |   |         |                |               |                 |             |       |           |  |
|----------|-----------|------|----------|----------|---|---|---|---------|----------------|---------------|-----------------|-------------|-------|-----------|--|
| At_chr10 | Cufflinks | exon | 31440601 | 31440969 | . | + | . | gene_id | "XLOC_013182"; | transcript_id | "Novel_000253"; | exon_number | "15"; | gene_type |  |
| At_chr10 | Cufflinks | exon | 31435970 | 31436311 | . | + | . | gene_id | "XLOC_013182"; | transcript_id | "Novel_000254"; | exon_number | "1";  | gene_type |  |
| At_chr10 | Cufflinks | exon | 31436600 | 31436732 | . | + | . | gene_id | "XLOC_013182"; | transcript_id | "Novel_000254"; | exon_number | "2";  | gene_type |  |
| At_chr10 | Cufflinks | exon | 31436842 | 31436913 | . | + | . | gene_id | "XLOC_013182"; | transcript_id | "Novel_000254"; | exon_number | "3";  | gene_type |  |
| At_chr10 | Cufflinks | exon | 31437017 | 31437082 | . | + | . | gene_id | "XLOC_013182"; | transcript_id | "Novel_000254"; | exon_number | "4";  | gene_type |  |
| At_chr10 | Cufflinks | exon | 31437172 | 31437243 | . | + | . | gene_id | "XLOC_013182"; | transcript_id | "Novel_000254"; | exon_number | "5";  | gene_type |  |
| At_chr10 | Cufflinks | exon | 31437345 | 31437416 | . | + | . | gene_id | "XLOC_013182"; | transcript_id | "Novel_000254"; | exon_number | "6";  | gene_type |  |
| At_chr10 | Cufflinks | exon | 31437784 | 31437855 | . | + | . | gene_id | "XLOC_013182"; | transcript_id | "Novel_000254"; | exon_number | "7";  | gene_type |  |
| At_chr10 | Cufflinks | exon | 31437967 | 31438032 | . | + | . | gene_id | "XLOC_013182"; | transcript_id | "Novel_000254"; | exon_number | "8";  | gene_type |  |
| At_chr10 | Cufflinks | exon | 31438111 | 31438176 | . | + | . | gene_id | "XLOC_013182"; | transcript_id | "Novel_000254"; | exon_number | "9";  | gene_type |  |
| At_chr10 | Cufflinks | exon | 31438264 | 31438544 | . | + | . | gene_id | "XLOC_013182"; | transcript_id | "Novel_000254"; | exon_number | "10"; | gene_type |  |
| At_chr10 | Cufflinks | exon | 31439066 | 31439319 | . | + | . | gene_id | "XLOC_013182"; | transcript_id | "Novel_000254"; | exon_number | "11"; | gene_type |  |
| At_chr10 | Cufflinks | exon | 31439450 | 31439721 | . | + | . | gene_id | "XLOC_013182"; | transcript_id | "Novel_000254"; | exon_number | "12"; | gene_type |  |
| At_chr10 | Cufflinks | exon | 31439820 | 31439955 | . | + | . | gene_id | "XLOC_013182"; | transcript_id | "Novel_000254"; | exon_number | "13"; | gene_type |  |
| At_chr10 | Cufflinks | exon | 31440079 | 31440218 | . | + | . | gene_id | "XLOC_013182"; | transcript_id | "Novel_000254"; | exon_number | "14"; | gene_type |  |
| At_chr10 | Cufflinks | exon | 31440336 | 31440492 | . | + | . | gene_id | "XLOC_013182"; | transcript_id | "Novel_000254"; | exon_number | "15"; | gene_type |  |
| At_chr10 | Cufflinks | exon | 31440601 | 31441132 | . | + | . | gene_id | "XLOC_013182"; | transcript_id | "Novel_000254"; | exon_number | "16"; | gene_type |  |
| At_chr10 | Cufflinks | exon | 40122565 | 40122882 | . | + | . | gene_id | "XLOC_013569"; | transcript_id | "Novel_000255"; | exon_number | "1";  | gene_type |  |
| At_chr10 | Cufflinks | exon | 40316019 | 40316246 | . | + | . | gene_id | "XLOC_013580"; | transcript_id | "Novel_000256"; | exon_number | "1";  | gene_type |  |
| At_chr10 | Cufflinks | exon | 40316528 | 40317692 | . | + | . | gene_id | "XLOC_013580"; | transcript_id | "Novel_000256"; | exon_number | "2";  | gene_type |  |
| At_chr10 | Cufflinks | exon | 40318132 | 40318197 | . | + | . | gene_id | "XLOC_013580"; | transcript_id | "Novel_000256"; | exon_number | "3";  | gene_type |  |
| At_chr10 | Cufflinks | exon | 40319190 | 40319698 | . | + | . | gene_id | "XLOC_013580"; | transcript_id | "Novel_000256"; | exon_number | "4";  | gene_type |  |
| At_chr10 | Cufflinks | exon | 40338755 | 40339410 | . | + | . | gene_id | "XLOC_013588"; | transcript_id | "Novel_000257"; | exon_number | "1";  | gene_type |  |
| At_chr10 | Cufflinks | exon | 40339606 | 40339717 | . | + | . | gene_id | "XLOC_013588"; | transcript_id | "Novel_000257"; | exon_number | "2";  | gene_type |  |
| At_chr10 | Cufflinks | exon | 40342503 | 40342853 | . | + | . | gene_id | "XLOC_013588"; | transcript_id | "Novel_000257"; | exon_number | "3";  | gene_type |  |
| At_chr10 | Cufflinks | exon | 40342910 | 40343064 | . | + | . | gene_id | "XLOC_013588"; | transcript_id | "Novel_000258"; | exon_number | "1";  | gene_type |  |
| At_chr10 | Cufflinks | exon | 40343165 | 40343259 | . | + | . | gene_id | "XLOC_013588"; | transcript_id | "Novel_000258"; | exon_number | "2";  | gene_type |  |
| At_chr10 | Cufflinks | exon | 40343349 | 40343706 | . | + | . | gene_id | "XLOC_013588"; | transcript_id | "Novel_000258"; | exon_number | "3";  | gene_type |  |
| At_chr10 | Cufflinks | exon | 40343805 | 40344018 | . | + | . | gene_id | "XLOC_013588"; | transcript_id | "Novel_000258"; | exon_number | "4";  | gene_type |  |
| At_chr10 | Cufflinks | exon | 40345987 | 40346677 | . | + | . | gene_id | "XLOC_013588"; | transcript_id | "Novel_000258"; | exon_number | "5";  | gene_type |  |
| At_chr10 | Cufflinks | exon | 40342920 | 40343706 | . | + | . | gene_id | "XLOC_013588"; | transcript_id | "Novel_000259"; | exon_number | "1";  | gene_type |  |
| At_chr10 | Cufflinks | exon | 40343805 | 40344018 | . | + | . | gene_id | "XLOC_013588"; | transcript_id | "Novel_000259"; | exon_number | "2";  | gene_type |  |
| At_chr10 | Cufflinks | exon | 40345987 | 40346844 | . | + | . | gene_id | "XLOC_013588"; | transcript_id | "Novel_000259"; | exon_number | "3";  | gene_type |  |
| At_chr10 | Cufflinks | exon | 40342949 | 40343064 | . | + | . | gene_id | "XLOC_013588"; | transcript_id | "Novel_000260"; | exon_number | "1";  | gene_type |  |
| At_chr10 | Cufflinks | exon | 40343165 | 40343706 | . | + | . | gene_id | "XLOC_013588"; | transcript_id | "Novel_000260"; | exon_number | "2";  | gene_type |  |

|          |           |      |          |          |   |   |   |         |                |               |                 |             |      |           |   |
|----------|-----------|------|----------|----------|---|---|---|---------|----------------|---------------|-----------------|-------------|------|-----------|---|
| At_chr10 | Cufflinks | exon | 40343805 | 40344018 | . | + | . | gene_id | "XLOC_013588"; | transcript_id | "Novel_000260"; | exon_number | "3"; | gene_type | " |
| At_chr10 | Cufflinks | exon | 40345987 | 40346672 | . | + | . | gene_id | "XLOC_013588"; | transcript_id | "Novel_000260"; | exon_number | "4"; | gene_type | " |
| At_chr10 | Cufflinks | exon | 40958729 | 40958818 | . | + | . | gene_id | "XLOC_013620"; | transcript_id | "Novel_000261"; | exon_number | "1"; | gene_type | " |
| At_chr10 | Cufflinks | exon | 40958943 | 40959123 | . | + | . | gene_id | "XLOC_013620"; | transcript_id | "Novel_000261"; | exon_number | "2"; | gene_type | " |
| At_chr10 | Cufflinks | exon | 40959219 | 40960647 | . | + | . | gene_id | "XLOC_013620"; | transcript_id | "Novel_000261"; | exon_number | "3"; | gene_type | " |
| At_chr10 | Cufflinks | exon | 45095878 | 45095994 | . | + | . | gene_id | "XLOC_013761"; | transcript_id | "Novel_000262"; | exon_number | "1"; | gene_type | " |
| At_chr10 | Cufflinks | exon | 45096068 | 45096134 | . | + | . | gene_id | "XLOC_013761"; | transcript_id | "Novel_000262"; | exon_number | "2"; | gene_type | " |
| At_chr10 | Cufflinks | exon | 45096296 | 45096455 | . | + | . | gene_id | "XLOC_013761"; | transcript_id | "Novel_000262"; | exon_number | "3"; | gene_type | " |
| At_chr10 | Cufflinks | exon | 45095885 | 45095994 | . | + | . | gene_id | "XLOC_013761"; | transcript_id | "Novel_000263"; | exon_number | "1"; | gene_type | " |
| At_chr10 | Cufflinks | exon | 45096068 | 45096191 | . | + | . | gene_id | "XLOC_013761"; | transcript_id | "Novel_000263"; | exon_number | "2"; | gene_type | " |
| At_chr10 | Cufflinks | exon | 46925883 | 46926146 | . | + | . | gene_id | "XLOC_013827"; | transcript_id | "Novel_000264"; | exon_number | "1"; | gene_type | " |
| At_chr10 | Cufflinks | exon | 55349762 | 55352450 | . | + | . | gene_id | "XLOC_014163"; | transcript_id | "Novel_000265"; | exon_number | "1"; | gene_type | " |
| At_chr10 | Cufflinks | exon | 55352548 | 55354210 | . | + | . | gene_id | "XLOC_014163"; | transcript_id | "Novel_000265"; | exon_number | "2"; | gene_type | " |
| At_chr10 | Cufflinks | exon | 60394634 | 60394659 | . | + | . | gene_id | "XLOC_014297"; | transcript_id | "Novel_000266"; | exon_number | "1"; | gene_type | " |
| At_chr10 | Cufflinks | exon | 60394832 | 60395016 | . | + | . | gene_id | "XLOC_014297"; | transcript_id | "Novel_000266"; | exon_number | "2"; | gene_type | " |
| At_chr10 | Cufflinks | exon | 63739794 | 63740049 | . | + | . | gene_id | "XLOC_014477"; | transcript_id | "Novel_000267"; | exon_number | "1"; | gene_type | " |
| At_chr10 | Cufflinks | exon | 63740168 | 63740746 | . | + | . | gene_id | "XLOC_014477"; | transcript_id | "Novel_000267"; | exon_number | "2"; | gene_type | " |
| At_chr10 | Cufflinks | exon | 67449336 | 67449755 | . | + | . | gene_id | "XLOC_014797"; | transcript_id | "Novel_000268"; | exon_number | "1"; | gene_type | " |
| At_chr10 | Cufflinks | exon | 67449840 | 67450230 | . | + | . | gene_id | "XLOC_014797"; | transcript_id | "Novel_000268"; | exon_number | "2"; | gene_type | " |
| At_chr10 | Cufflinks | exon | 68506920 | 68506952 | . | + | . | gene_id | "XLOC_014891"; | transcript_id | "Novel_000269"; | exon_number | "1"; | gene_type | " |
| At_chr10 | Cufflinks | exon | 68508861 | 68508964 | . | + | . | gene_id | "XLOC_014891"; | transcript_id | "Novel_000269"; | exon_number | "2"; | gene_type | " |
| At_chr10 | Cufflinks | exon | 68509256 | 68509813 | . | + | . | gene_id | "XLOC_014891"; | transcript_id | "Novel_000269"; | exon_number | "3"; | gene_type | " |
| At_chr10 | Cufflinks | exon | 68506957 | 68507428 | . | + | . | gene_id | "XLOC_014891"; | transcript_id | "Novel_000270"; | exon_number | "1"; | gene_type | " |
| At_chr10 | Cufflinks | exon | 68508861 | 68508964 | . | + | . | gene_id | "XLOC_014891"; | transcript_id | "Novel_000270"; | exon_number | "2"; | gene_type | " |
| At_chr10 | Cufflinks | exon | 68509256 | 68509813 | . | + | . | gene_id | "XLOC_014891"; | transcript_id | "Novel_000270"; | exon_number | "3"; | gene_type | " |
| At_chr10 | Cufflinks | exon | 68508487 | 68508964 | . | + | . | gene_id | "XLOC_014891"; | transcript_id | "Novel_000271"; | exon_number | "1"; | gene_type | " |
| At_chr10 | Cufflinks | exon | 68509374 | 68509749 | . | + | . | gene_id | "XLOC_014891"; | transcript_id | "Novel_000271"; | exon_number | "2"; | gene_type | " |
| At_chr10 | Cufflinks | exon | 68899878 | 68899994 | . | + | . | gene_id | "XLOC_014916"; | transcript_id | "Novel_000272"; | exon_number | "1"; | gene_type | " |
| At_chr10 | Cufflinks | exon | 68900867 | 68901094 | . | + | . | gene_id | "XLOC_014916"; | transcript_id | "Novel_000272"; | exon_number | "2"; | gene_type | " |
| At_chr10 | Cufflinks | exon | 68901588 | 68902737 | . | + | . | gene_id | "XLOC_014916"; | transcript_id | "Novel_000272"; | exon_number | "3"; | gene_type | " |
| At_chr10 | Cufflinks | exon | 68899979 | 68900140 | . | + | . | gene_id | "XLOC_014916"; | transcript_id | "Novel_000273"; | exon_number | "1"; | gene_type | " |
| At_chr10 | Cufflinks | exon | 68900867 | 68901094 | . | + | . | gene_id | "XLOC_014916"; | transcript_id | "Novel_000273"; | exon_number | "2"; | gene_type | " |
| At_chr10 | Cufflinks | exon | 68901588 | 68902170 | . | + | . | gene_id | "XLOC_014916"; | transcript_id | "Novel_000273"; | exon_number | "3"; | gene_type | " |
| At_chr10 | Cufflinks | exon | 68902806 | 68902826 | . | + | . | gene_id | "XLOC_014916"; | transcript_id | "Novel_000273"; | exon_number | "4"; | gene_type | " |
| At_chr10 | Cufflinks | exon | 68904132 | 68905156 | . | + | . | gene_id | "XLOC_014916"; | transcript_id | "Novel_000274"; | exon_number | "1"; | gene_type | " |

|          |           |      |          |          |   |   |   |         |                |               |                 |             |      |           |   |
|----------|-----------|------|----------|----------|---|---|---|---------|----------------|---------------|-----------------|-------------|------|-----------|---|
| At_chr10 | Cufflinks | exon | 68905598 | 68905999 | . | + | . | gene_id | "XLOC_014916"; | transcript_id | "Novel_000274"; | exon_number | "2"; | gene_type | " |
| At_chr10 | Cufflinks | exon | 68906241 | 68906747 | . | + | . | gene_id | "XLOC_014916"; | transcript_id | "Novel_000274"; | exon_number | "3"; | gene_type | " |
| At_chr10 | Cufflinks | exon | 68905214 | 68905999 | . | + | . | gene_id | "XLOC_014916"; | transcript_id | "Novel_000275"; | exon_number | "1"; | gene_type | " |
| At_chr10 | Cufflinks | exon | 68906241 | 68907300 | . | + | . | gene_id | "XLOC_014916"; | transcript_id | "Novel_000275"; | exon_number | "2"; | gene_type | " |
| At_chr10 | Cufflinks | exon | 69265882 | 69266042 | . | + | . | gene_id | "XLOC_014946"; | transcript_id | "Novel_000276"; | exon_number | "1"; | gene_type | " |
| At_chr10 | Cufflinks | exon | 69267494 | 69269729 | . | + | . | gene_id | "XLOC_014946"; | transcript_id | "Novel_000276"; | exon_number | "2"; | gene_type | " |
| At_chr10 | Cufflinks | exon | 70081177 | 70081354 | . | + | . | gene_id | "XLOC_015016"; | transcript_id | "Novel_000277"; | exon_number | "1"; | gene_type | " |
| At_chr10 | Cufflinks | exon | 70081522 | 70081924 | . | + | . | gene_id | "XLOC_015016"; | transcript_id | "Novel_000277"; | exon_number | "2"; | gene_type | " |
| At_chr10 | Cufflinks | exon | 70082426 | 70082508 | . | + | . | gene_id | "XLOC_015016"; | transcript_id | "Novel_000277"; | exon_number | "3"; | gene_type | " |
| At_chr10 | Cufflinks | exon | 70082747 | 70082785 | . | + | . | gene_id | "XLOC_015016"; | transcript_id | "Novel_000277"; | exon_number | "4"; | gene_type | " |
| At_chr10 | Cufflinks | exon | 70083037 | 70083107 | . | + | . | gene_id | "XLOC_015016"; | transcript_id | "Novel_000277"; | exon_number | "5"; | gene_type | " |
| At_chr10 | Cufflinks | exon | 70083181 | 70083295 | . | + | . | gene_id | "XLOC_015016"; | transcript_id | "Novel_000277"; | exon_number | "6"; | gene_type | " |
| At_chr10 | Cufflinks | exon | 70083540 | 70083670 | . | + | . | gene_id | "XLOC_015016"; | transcript_id | "Novel_000277"; | exon_number | "7"; | gene_type | " |
| At_chr10 | Cufflinks | exon | 70083748 | 70083948 | . | + | . | gene_id | "XLOC_015016"; | transcript_id | "Novel_000277"; | exon_number | "8"; | gene_type | " |
| At_chr10 | Cufflinks | exon | 73009577 | 73010055 | . | + | . | gene_id | "XLOC_015168"; | transcript_id | "Novel_000278"; | exon_number | "1"; | gene_type | " |
| At_chr10 | Cufflinks | exon | 73010159 | 73010215 | . | + | . | gene_id | "XLOC_015168"; | transcript_id | "Novel_000278"; | exon_number | "2"; | gene_type | " |
| At_chr10 | Cufflinks | exon | 73010475 | 73010979 | . | + | . | gene_id | "XLOC_015168"; | transcript_id | "Novel_000278"; | exon_number | "3"; | gene_type | " |
| At_chr10 | Cufflinks | exon | 73009627 | 73010055 | . | + | . | gene_id | "XLOC_015168"; | transcript_id | "Novel_000279"; | exon_number | "1"; | gene_type | " |
| At_chr10 | Cufflinks | exon | 73010159 | 73010215 | . | + | . | gene_id | "XLOC_015168"; | transcript_id | "Novel_000279"; | exon_number | "2"; | gene_type | " |
| At_chr10 | Cufflinks | exon | 73010475 | 73010566 | . | + | . | gene_id | "XLOC_015168"; | transcript_id | "Novel_000279"; | exon_number | "3"; | gene_type | " |
| At_chr10 | Cufflinks | exon | 73010641 | 73011136 | . | + | . | gene_id | "XLOC_015168"; | transcript_id | "Novel_000279"; | exon_number | "4"; | gene_type | " |
| At_chr10 | Cufflinks | exon | 74124330 | 74124948 | . | + | . | gene_id | "XLOC_015202"; | transcript_id | "Novel_000280"; | exon_number | "1"; | gene_type | " |
| At_chr10 | Cufflinks | exon | 74125066 | 74125607 | . | + | . | gene_id | "XLOC_015202"; | transcript_id | "Novel_000280"; | exon_number | "2"; | gene_type | " |
| At_chr10 | Cufflinks | exon | 74131533 | 74133350 | . | + | . | gene_id | "XLOC_015202"; | transcript_id | "Novel_000280"; | exon_number | "3"; | gene_type | " |
| At_chr10 | Cufflinks | exon | 74483491 | 74484148 | . | + | . | gene_id | "XLOC_015247"; | transcript_id | "Novel_000281"; | exon_number | "1"; | gene_type | " |
| At_chr10 | Cufflinks | exon | 74484267 | 74484444 | . | + | . | gene_id | "XLOC_015247"; | transcript_id | "Novel_000281"; | exon_number | "2"; | gene_type | " |
| At_chr10 | Cufflinks | exon | 74484582 | 74485156 | . | + | . | gene_id | "XLOC_015247"; | transcript_id | "Novel_000281"; | exon_number | "3"; | gene_type | " |
| At_chr10 | Cufflinks | exon | 74485559 | 74485991 | . | + | . | gene_id | "XLOC_015247"; | transcript_id | "Novel_000281"; | exon_number | "4"; | gene_type | " |
| At_chr10 | Cufflinks | exon | 75622371 | 75622528 | . | + | . | gene_id | "XLOC_015342"; | transcript_id | "Novel_000282"; | exon_number | "1"; | gene_type | " |
| At_chr10 | Cufflinks | exon | 75623656 | 75623691 | . | + | . | gene_id | "XLOC_015342"; | transcript_id | "Novel_000282"; | exon_number | "2"; | gene_type | " |
| At_chr10 | Cufflinks | exon | 75623798 | 75623883 | . | + | . | gene_id | "XLOC_015342"; | transcript_id | "Novel_000282"; | exon_number | "3"; | gene_type | " |
| At_chr10 | Cufflinks | exon | 75624016 | 75624156 | . | + | . | gene_id | "XLOC_015342"; | transcript_id | "Novel_000282"; | exon_number | "4"; | gene_type | " |
| At_chr10 | Cufflinks | exon | 75624290 | 75624630 | . | + | . | gene_id | "XLOC_015342"; | transcript_id | "Novel_000282"; | exon_number | "5"; | gene_type | " |
| At_chr10 | Cufflinks | exon | 76437530 | 76437616 | . | + | . | gene_id | "XLOC_015408"; | transcript_id | "Novel_000283"; | exon_number | "1"; | gene_type | " |
| At_chr10 | Cufflinks | exon | 76438424 | 76439583 | . | + | . | gene_id | "XLOC_015408"; | transcript_id | "Novel_000283"; | exon_number | "2"; | gene_type | " |

|          |           |      |          |          |   |   |   |         |                |               |                 |             |       |           |   |
|----------|-----------|------|----------|----------|---|---|---|---------|----------------|---------------|-----------------|-------------|-------|-----------|---|
| At_chr10 | Cufflinks | exon | 76565263 | 76566045 | . | + | . | gene_id | "XLOC_015416"; | transcript_id | "Novel_000284"; | exon_number | "1";  | gene_type | " |
| At_chr10 | Cufflinks | exon | 76567227 | 76567635 | . | + | . | gene_id | "XLOC_015416"; | transcript_id | "Novel_000284"; | exon_number | "2";  | gene_type | " |
| At_chr10 | Cufflinks | exon | 76565328 | 76565401 | . | + | . | gene_id | "XLOC_015416"; | transcript_id | "Novel_000285"; | exon_number | "1";  | gene_type | " |
| At_chr10 | Cufflinks | exon | 76565714 | 76566045 | . | + | . | gene_id | "XLOC_015416"; | transcript_id | "Novel_000285"; | exon_number | "2";  | gene_type | " |
| At_chr10 | Cufflinks | exon | 76567227 | 76567359 | . | + | . | gene_id | "XLOC_015416"; | transcript_id | "Novel_000285"; | exon_number | "3";  | gene_type | " |
| At_chr10 | Cufflinks | exon | 76568260 | 76568676 | . | + | . | gene_id | "XLOC_015416"; | transcript_id | "Novel_000285"; | exon_number | "4";  | gene_type | " |
| At_chr10 | Cufflinks | exon | 76565373 | 76565401 | . | + | . | gene_id | "XLOC_015416"; | transcript_id | "Novel_000286"; | exon_number | "1";  | gene_type | " |
| At_chr10 | Cufflinks | exon | 76565714 | 76566045 | . | + | . | gene_id | "XLOC_015416"; | transcript_id | "Novel_000286"; | exon_number | "2";  | gene_type | " |
| At_chr10 | Cufflinks | exon | 76567227 | 76567593 | . | + | . | gene_id | "XLOC_015416"; | transcript_id | "Novel_000286"; | exon_number | "3";  | gene_type | " |
| At_chr10 | Cufflinks | exon | 76616348 | 76616877 | . | + | . | gene_id | "XLOC_015427"; | transcript_id | "Novel_000287"; | exon_number | "1";  | gene_type | " |
| At_chr10 | Cufflinks | exon | 76616952 | 76617247 | . | + | . | gene_id | "XLOC_015427"; | transcript_id | "Novel_000287"; | exon_number | "2";  | gene_type | " |
| At_chr10 | Cufflinks | exon | 76617341 | 76617481 | . | + | . | gene_id | "XLOC_015427"; | transcript_id | "Novel_000287"; | exon_number | "3";  | gene_type | " |
| At_chr10 | Cufflinks | exon | 76617571 | 76618090 | . | + | . | gene_id | "XLOC_015427"; | transcript_id | "Novel_000287"; | exon_number | "4";  | gene_type | " |
| At_chr10 | Cufflinks | exon | 76655393 | 76655591 | . | + | . | gene_id | "XLOC_015430"; | transcript_id | "Novel_000288"; | exon_number | "1";  | gene_type | " |
| At_chr10 | Cufflinks | exon | 76655889 | 76656127 | . | + | . | gene_id | "XLOC_015430"; | transcript_id | "Novel_000288"; | exon_number | "2";  | gene_type | " |
| At_chr10 | Cufflinks | exon | 76656406 | 76656563 | . | + | . | gene_id | "XLOC_015430"; | transcript_id | "Novel_000288"; | exon_number | "3";  | gene_type | " |
| At_chr10 | Cufflinks | exon | 76656786 | 76656892 | . | + | . | gene_id | "XLOC_015430"; | transcript_id | "Novel_000288"; | exon_number | "4";  | gene_type | " |
| At_chr10 | Cufflinks | exon | 76657000 | 76657100 | . | + | . | gene_id | "XLOC_015430"; | transcript_id | "Novel_000288"; | exon_number | "5";  | gene_type | " |
| At_chr10 | Cufflinks | exon | 76657181 | 76657257 | . | + | . | gene_id | "XLOC_015430"; | transcript_id | "Novel_000288"; | exon_number | "6";  | gene_type | " |
| At_chr10 | Cufflinks | exon | 76657449 | 76657568 | . | + | . | gene_id | "XLOC_015430"; | transcript_id | "Novel_000288"; | exon_number | "7";  | gene_type | " |
| At_chr10 | Cufflinks | exon | 76657657 | 76657887 | . | + | . | gene_id | "XLOC_015430"; | transcript_id | "Novel_000288"; | exon_number | "8";  | gene_type | " |
| At_chr10 | Cufflinks | exon | 76658023 | 76658139 | . | + | . | gene_id | "XLOC_015430"; | transcript_id | "Novel_000288"; | exon_number | "9";  | gene_type | " |
| At_chr10 | Cufflinks | exon | 76658234 | 76658308 | . | + | . | gene_id | "XLOC_015430"; | transcript_id | "Novel_000288"; | exon_number | "10"; | gene_type | " |
| At_chr10 | Cufflinks | exon | 76658393 | 76658470 | . | + | . | gene_id | "XLOC_015430"; | transcript_id | "Novel_000288"; | exon_number | "11"; | gene_type | " |
| At_chr10 | Cufflinks | exon | 76658542 | 76658601 | . | + | . | gene_id | "XLOC_015430"; | transcript_id | "Novel_000288"; | exon_number | "12"; | gene_type | " |
| At_chr10 | Cufflinks | exon | 76658686 | 76658748 | . | + | . | gene_id | "XLOC_015430"; | transcript_id | "Novel_000288"; | exon_number | "13"; | gene_type | " |
| At_chr10 | Cufflinks | exon | 76658843 | 76658987 | . | + | . | gene_id | "XLOC_015430"; | transcript_id | "Novel_000288"; | exon_number | "14"; | gene_type | " |
| At_chr10 | Cufflinks | exon | 76659087 | 76659225 | . | + | . | gene_id | "XLOC_015430"; | transcript_id | "Novel_000288"; | exon_number | "15"; | gene_type | " |
| At_chr10 | Cufflinks | exon | 76659371 | 76659448 | . | + | . | gene_id | "XLOC_015430"; | transcript_id | "Novel_000288"; | exon_number | "16"; | gene_type | " |
| At_chr10 | Cufflinks | exon | 76659533 | 76659692 | . | + | . | gene_id | "XLOC_015430"; | transcript_id | "Novel_000288"; | exon_number | "17"; | gene_type | " |
| At_chr10 | Cufflinks | exon | 76659770 | 76659868 | . | + | . | gene_id | "XLOC_015430"; | transcript_id | "Novel_000288"; | exon_number | "18"; | gene_type | " |
| At_chr10 | Cufflinks | exon | 76659979 | 76660083 | . | + | . | gene_id | "XLOC_015430"; | transcript_id | "Novel_000288"; | exon_number | "19"; | gene_type | " |
| At_chr10 | Cufflinks | exon | 76660201 | 76660728 | . | + | . | gene_id | "XLOC_015430"; | transcript_id | "Novel_000288"; | exon_number | "20"; | gene_type | " |
| At_chr10 | Cufflinks | exon | 76871575 | 76871736 | . | + | . | gene_id | "XLOC_015462"; | transcript_id | "Novel_000289"; | exon_number | "1";  | gene_type | " |
| At_chr10 | Cufflinks | exon | 76871832 | 76871955 | . | + | . | gene_id | "XLOC_015462"; | transcript_id | "Novel_000289"; | exon_number | "2";  | gene_type | " |





|          |           |      |          |          |   |   |   |         |                |               |                 |             |      |           |   |
|----------|-----------|------|----------|----------|---|---|---|---------|----------------|---------------|-----------------|-------------|------|-----------|---|
| At_chr10 | Cufflinks | exon | 76979472 | 76979569 | . | + | . | gene_id | "XLOC_015484"; | transcript_id | "Novel_000293"; | exon_number | "4"; | gene_type | " |
| At_chr10 | Cufflinks | exon | 76979655 | 76981119 | . | + | . | gene_id | "XLOC_015484"; | transcript_id | "Novel_000293"; | exon_number | "5"; | gene_type | " |
| At_chr10 | Cufflinks | exon | 76981224 | 76981343 | . | + | . | gene_id | "XLOC_015484"; | transcript_id | "Novel_000293"; | exon_number | "6"; | gene_type | " |
| At_chr10 | Cufflinks | exon | 76981528 | 76982726 | . | + | . | gene_id | "XLOC_015484"; | transcript_id | "Novel_000293"; | exon_number | "7"; | gene_type | " |
| At_chr10 | Cufflinks | exon | 77053647 | 77053704 | . | + | . | gene_id | "XLOC_015497"; | transcript_id | "Novel_000294"; | exon_number | "1"; | gene_type | " |
| At_chr10 | Cufflinks | exon | 77054351 | 77054431 | . | + | . | gene_id | "XLOC_015497"; | transcript_id | "Novel_000294"; | exon_number | "2"; | gene_type | " |
| At_chr10 | Cufflinks | exon | 77054580 | 77054677 | . | + | . | gene_id | "XLOC_015497"; | transcript_id | "Novel_000294"; | exon_number | "3"; | gene_type | " |
| At_chr10 | Cufflinks | exon | 77054766 | 77055611 | . | + | . | gene_id | "XLOC_015497"; | transcript_id | "Novel_000294"; | exon_number | "4"; | gene_type | " |
| At_chr10 | Cufflinks | exon | 84285754 | 84287128 | . | + | . | gene_id | "XLOC_015813"; | transcript_id | "Novel_000295"; | exon_number | "1"; | gene_type | " |
| At_chr10 | Cufflinks | exon | 84287709 | 84289817 | . | + | . | gene_id | "XLOC_015813"; | transcript_id | "Novel_000295"; | exon_number | "2"; | gene_type | " |
| At_chr10 | Cufflinks | exon | 84285892 | 84287128 | . | + | . | gene_id | "XLOC_015813"; | transcript_id | "Novel_000296"; | exon_number | "1"; | gene_type | " |
| At_chr10 | Cufflinks | exon | 84287664 | 84289851 | . | + | . | gene_id | "XLOC_015813"; | transcript_id | "Novel_000296"; | exon_number | "2"; | gene_type | " |
| At_chr10 | Cufflinks | exon | 85359118 | 85359411 | . | + | . | gene_id | "XLOC_015849"; | transcript_id | "Novel_000297"; | exon_number | "1"; | gene_type | " |
| At_chr10 | Cufflinks | exon | 85359496 | 85360215 | . | + | . | gene_id | "XLOC_015849"; | transcript_id | "Novel_000297"; | exon_number | "2"; | gene_type | " |
| At_chr10 | Cufflinks | exon | 85359171 | 85359411 | . | + | . | gene_id | "XLOC_015849"; | transcript_id | "Novel_000298"; | exon_number | "1"; | gene_type | " |
| At_chr10 | Cufflinks | exon | 85359496 | 85359690 | . | + | . | gene_id | "XLOC_015849"; | transcript_id | "Novel_000298"; | exon_number | "2"; | gene_type | " |
| At_chr10 | Cufflinks | exon | 85360502 | 85365057 | . | + | . | gene_id | "XLOC_015849"; | transcript_id | "Novel_000298"; | exon_number | "3"; | gene_type | " |
| At_chr10 | Cufflinks | exon | 85359242 | 85359690 | . | + | . | gene_id | "XLOC_015849"; | transcript_id | "Novel_000299"; | exon_number | "1"; | gene_type | " |
| At_chr10 | Cufflinks | exon | 85360502 | 85361156 | . | + | . | gene_id | "XLOC_015849"; | transcript_id | "Novel_000299"; | exon_number | "2"; | gene_type | " |
| At_chr10 | Cufflinks | exon | 91458713 | 91459177 | . | + | . | gene_id | "XLOC_016041"; | transcript_id | "Novel_000300"; | exon_number | "1"; | gene_type | " |
| At_chr10 | Cufflinks | exon | 91459336 | 91459562 | . | + | . | gene_id | "XLOC_016041"; | transcript_id | "Novel_000300"; | exon_number | "2"; | gene_type | " |
| At_chr10 | Cufflinks | exon | 92100045 | 92100095 | . | + | . | gene_id | "XLOC_016052"; | transcript_id | "Novel_000301"; | exon_number | "1"; | gene_type | " |
| At_chr10 | Cufflinks | exon | 92100277 | 92100341 | . | + | . | gene_id | "XLOC_016052"; | transcript_id | "Novel_000301"; | exon_number | "2"; | gene_type | " |
| At_chr10 | Cufflinks | exon | 92100472 | 92100700 | . | + | . | gene_id | "XLOC_016052"; | transcript_id | "Novel_000301"; | exon_number | "3"; | gene_type | " |
| At_chr10 | Cufflinks | exon | 92100050 | 92100095 | . | + | . | gene_id | "XLOC_016052"; | transcript_id | "Novel_000302"; | exon_number | "1"; | gene_type | " |
| At_chr10 | Cufflinks | exon | 92100277 | 92100341 | . | + | . | gene_id | "XLOC_016052"; | transcript_id | "Novel_000302"; | exon_number | "2"; | gene_type | " |
| At_chr10 | Cufflinks | exon | 92100472 | 92100539 | . | + | . | gene_id | "XLOC_016052"; | transcript_id | "Novel_000302"; | exon_number | "3"; | gene_type | " |
| At_chr10 | Cufflinks | exon | 92106046 | 92106201 | . | + | . | gene_id | "XLOC_016052"; | transcript_id | "Novel_000302"; | exon_number | "4"; | gene_type | " |
| At_chr10 | Cufflinks | exon | 92673239 | 92673594 | . | + | . | gene_id | "XLOC_016075"; | transcript_id | "Novel_000303"; | exon_number | "1"; | gene_type | " |
| At_chr10 | Cufflinks | exon | 92673719 | 92674195 | . | + | . | gene_id | "XLOC_016075"; | transcript_id | "Novel_000303"; | exon_number | "2"; | gene_type | " |
| At_chr10 | Cufflinks | exon | 3117053  | 3117292  | . | - | . | gene_id | "XLOC_016316"; | transcript_id | "Novel_000304"; | exon_number | "1"; | gene_type | " |
| At_chr10 | Cufflinks | exon | 4151386  | 4152738  | . | - | . | gene_id | "XLOC_016375"; | transcript_id | "Novel_000305"; | exon_number | "1"; | gene_type | " |
| At_chr10 | Cufflinks | exon | 4154060  | 4154444  | . | - | . | gene_id | "XLOC_016375"; | transcript_id | "Novel_000305"; | exon_number | "2"; | gene_type | " |
| At_chr10 | Cufflinks | exon | 4151390  | 4152738  | . | - | . | gene_id | "XLOC_016375"; | transcript_id | "Novel_000306"; | exon_number | "1"; | gene_type | " |
| At_chr10 | Cufflinks | exon | 4154060  | 4154188  | . | - | . | gene_id | "XLOC_016375"; | transcript_id | "Novel_000306"; | exon_number | "2"; | gene_type | " |

|          |           |      |          |          |   |   |         |                |               |                 |             |      |           |   |
|----------|-----------|------|----------|----------|---|---|---------|----------------|---------------|-----------------|-------------|------|-----------|---|
| At_chr10 | Cufflinks | exon | 4154301  | 4154444  | . | . | gene_id | "XLOC_016375"; | transcript_id | "Novel_000306"; | exon_number | "3"; | gene_type | " |
| At_chr10 | Cufflinks | exon | 11677336 | 11678833 | . | . | gene_id | "XLOC_016640"; | transcript_id | "Novel_000307"; | exon_number | "1"; | gene_type | " |
| At_chr10 | Cufflinks | exon | 11679010 | 11679565 | . | . | gene_id | "XLOC_016640"; | transcript_id | "Novel_000307"; | exon_number | "2"; | gene_type | " |
| At_chr10 | Cufflinks | exon | 11679779 | 11679892 | . | . | gene_id | "XLOC_016640"; | transcript_id | "Novel_000307"; | exon_number | "3"; | gene_type | " |
| At_chr10 | Cufflinks | exon | 11679978 | 11680200 | . | . | gene_id | "XLOC_016640"; | transcript_id | "Novel_000307"; | exon_number | "4"; | gene_type | " |
| At_chr10 | Cufflinks | exon | 11680753 | 11680841 | . | . | gene_id | "XLOC_016640"; | transcript_id | "Novel_000307"; | exon_number | "5"; | gene_type | " |
| At_chr10 | Cufflinks | exon | 11681000 | 11681110 | . | . | gene_id | "XLOC_016640"; | transcript_id | "Novel_000307"; | exon_number | "6"; | gene_type | " |
| At_chr10 | Cufflinks | exon | 11681252 | 11681334 | . | . | gene_id | "XLOC_016640"; | transcript_id | "Novel_000307"; | exon_number | "7"; | gene_type | " |
| At_chr10 | Cufflinks | exon | 11677617 | 11679565 | . | . | gene_id | "XLOC_016640"; | transcript_id | "Novel_000308"; | exon_number | "1"; | gene_type | " |
| At_chr10 | Cufflinks | exon | 11679779 | 11679889 | . | . | gene_id | "XLOC_016640"; | transcript_id | "Novel_000308"; | exon_number | "2"; | gene_type | " |
| At_chr10 | Cufflinks | exon | 11679978 | 11680200 | . | . | gene_id | "XLOC_016640"; | transcript_id | "Novel_000308"; | exon_number | "3"; | gene_type | " |
| At_chr10 | Cufflinks | exon | 11680753 | 11680841 | . | . | gene_id | "XLOC_016640"; | transcript_id | "Novel_000308"; | exon_number | "4"; | gene_type | " |
| At_chr10 | Cufflinks | exon | 11681000 | 11681110 | . | . | gene_id | "XLOC_016640"; | transcript_id | "Novel_000308"; | exon_number | "5"; | gene_type | " |
| At_chr10 | Cufflinks | exon | 11681252 | 11681389 | . | . | gene_id | "XLOC_016640"; | transcript_id | "Novel_000308"; | exon_number | "6"; | gene_type | " |
| At_chr10 | Cufflinks | exon | 19199878 | 19202300 | . | . | gene_id | "XLOC_016891"; | transcript_id | "Novel_000309"; | exon_number | "1"; | gene_type | " |
| At_chr10 | Cufflinks | exon | 19203838 | 19204197 | . | . | gene_id | "XLOC_016891"; | transcript_id | "Novel_000309"; | exon_number | "2"; | gene_type | " |
| At_chr10 | Cufflinks | exon | 23699147 | 23699210 | . | . | gene_id | "XLOC_017133"; | transcript_id | "Novel_000310"; | exon_number | "1"; | gene_type | " |
| At_chr10 | Cufflinks | exon | 23699325 | 23699535 | . | . | gene_id | "XLOC_017133"; | transcript_id | "Novel_000310"; | exon_number | "2"; | gene_type | " |
| At_chr10 | Cufflinks | exon | 23891692 | 23893358 | . | . | gene_id | "XLOC_017157"; | transcript_id | "Novel_000311"; | exon_number | "1"; | gene_type | " |
| At_chr10 | Cufflinks | exon | 23893452 | 23893490 | . | . | gene_id | "XLOC_017157"; | transcript_id | "Novel_000311"; | exon_number | "2"; | gene_type | " |
| At_chr10 | Cufflinks | exon | 23894272 | 23894507 | . | . | gene_id | "XLOC_017157"; | transcript_id | "Novel_000311"; | exon_number | "3"; | gene_type | " |
| At_chr10 | Cufflinks | exon | 23895589 | 23896658 | . | . | gene_id | "XLOC_017158"; | transcript_id | "Novel_000312"; | exon_number | "1"; | gene_type | " |
| At_chr10 | Cufflinks | exon | 23896729 | 23896827 | . | . | gene_id | "XLOC_017158"; | transcript_id | "Novel_000312"; | exon_number | "2"; | gene_type | " |
| At_chr10 | Cufflinks | exon | 23896914 | 23897075 | . | . | gene_id | "XLOC_017158"; | transcript_id | "Novel_000312"; | exon_number | "3"; | gene_type | " |
| At_chr10 | Cufflinks | exon | 23897335 | 23897415 | . | . | gene_id | "XLOC_017158"; | transcript_id | "Novel_000312"; | exon_number | "4"; | gene_type | " |
| At_chr10 | Cufflinks | exon | 23906996 | 23907073 | . | . | gene_id | "XLOC_017158"; | transcript_id | "Novel_000312"; | exon_number | "5"; | gene_type | " |
| At_chr10 | Cufflinks | exon | 23907191 | 23907255 | . | . | gene_id | "XLOC_017158"; | transcript_id | "Novel_000312"; | exon_number | "6"; | gene_type | " |
| At_chr10 | Cufflinks | exon | 23907359 | 23907440 | . | . | gene_id | "XLOC_017158"; | transcript_id | "Novel_000312"; | exon_number | "7"; | gene_type | " |
| At_chr10 | Cufflinks | exon | 23907978 | 23908056 | . | . | gene_id | "XLOC_017158"; | transcript_id | "Novel_000312"; | exon_number | "8"; | gene_type | " |
| At_chr10 | Cufflinks | exon | 25079003 | 25079153 | . | . | gene_id | "XLOC_017207"; | transcript_id | "Novel_000313"; | exon_number | "1"; | gene_type | " |
| At_chr10 | Cufflinks | exon | 25079287 | 25079413 | . | . | gene_id | "XLOC_017207"; | transcript_id | "Novel_000313"; | exon_number | "2"; | gene_type | " |
| At_chr10 | Cufflinks | exon | 25079520 | 25079564 | . | . | gene_id | "XLOC_017207"; | transcript_id | "Novel_000313"; | exon_number | "3"; | gene_type | " |
| At_chr10 | Cufflinks | exon | 25097968 | 25098689 | . | . | gene_id | "XLOC_017211"; | transcript_id | "Novel_000314"; | exon_number | "1"; | gene_type | " |
| At_chr10 | Cufflinks | exon | 25098810 | 25098898 | . | . | gene_id | "XLOC_017211"; | transcript_id | "Novel_000314"; | exon_number | "2"; | gene_type | " |
| At_chr10 | Cufflinks | exon | 25099013 | 25099072 | . | . | gene_id | "XLOC_017211"; | transcript_id | "Novel_000314"; | exon_number | "3"; | gene_type | " |

|          |           |      |          |          |   |   |         |                |               |                 |             |       |           |   |
|----------|-----------|------|----------|----------|---|---|---------|----------------|---------------|-----------------|-------------|-------|-----------|---|
| At_chr10 | Cufflinks | exon | 25098067 | 25098689 | . | . | gene_id | "XLOC_017211"; | transcript_id | "Novel_000315"; | exon_number | "1";  | gene_type | " |
| At_chr10 | Cufflinks | exon | 25098810 | 25098938 | . | . | gene_id | "XLOC_017211"; | transcript_id | "Novel_000315"; | exon_number | "2";  | gene_type | " |
| At_chr10 | Cufflinks | exon | 26479272 | 26479491 | . | . | gene_id | "XLOC_017296"; | transcript_id | "Novel_000316"; | exon_number | "1";  | gene_type | " |
| At_chr10 | Cufflinks | exon | 27852019 | 27852347 | . | . | gene_id | "XLOC_017409"; | transcript_id | "Novel_000317"; | exon_number | "1";  | gene_type | " |
| At_chr10 | Cufflinks | exon | 27852770 | 27853022 | . | . | gene_id | "XLOC_017409"; | transcript_id | "Novel_000317"; | exon_number | "2";  | gene_type | " |
| At_chr10 | Cufflinks | exon | 27853113 | 27853355 | . | . | gene_id | "XLOC_017409"; | transcript_id | "Novel_000317"; | exon_number | "3";  | gene_type | " |
| At_chr10 | Cufflinks | exon | 27853462 | 27853589 | . | . | gene_id | "XLOC_017409"; | transcript_id | "Novel_000317"; | exon_number | "4";  | gene_type | " |
| At_chr10 | Cufflinks | exon | 27853683 | 27853992 | . | . | gene_id | "XLOC_017409"; | transcript_id | "Novel_000317"; | exon_number | "5";  | gene_type | " |
| At_chr10 | Cufflinks | exon | 31445928 | 31445998 | . | . | gene_id | "XLOC_017625"; | transcript_id | "Novel_000318"; | exon_number | "1";  | gene_type | " |
| At_chr10 | Cufflinks | exon | 31446103 | 31446442 | . | . | gene_id | "XLOC_017625"; | transcript_id | "Novel_000318"; | exon_number | "2";  | gene_type | " |
| At_chr10 | Cufflinks | exon | 31959147 | 31959783 | . | . | gene_id | "XLOC_017646"; | transcript_id | "Novel_000319"; | exon_number | "1";  | gene_type | " |
| At_chr10 | Cufflinks | exon | 31960224 | 31960287 | . | . | gene_id | "XLOC_017646"; | transcript_id | "Novel_000319"; | exon_number | "2";  | gene_type | " |
| At_chr10 | Cufflinks | exon | 31960453 | 31960773 | . | . | gene_id | "XLOC_017646"; | transcript_id | "Novel_000319"; | exon_number | "3";  | gene_type | " |
| At_chr10 | Cufflinks | exon | 31963595 | 31963839 | . | . | gene_id | "XLOC_017646"; | transcript_id | "Novel_000319"; | exon_number | "4";  | gene_type | " |
| At_chr10 | Cufflinks | exon | 31963941 | 31964020 | . | . | gene_id | "XLOC_017646"; | transcript_id | "Novel_000319"; | exon_number | "5";  | gene_type | " |
| At_chr10 | Cufflinks | exon | 31964289 | 31964459 | . | . | gene_id | "XLOC_017646"; | transcript_id | "Novel_000319"; | exon_number | "6";  | gene_type | " |
| At_chr10 | Cufflinks | exon | 31964595 | 31965378 | . | . | gene_id | "XLOC_017646"; | transcript_id | "Novel_000319"; | exon_number | "7";  | gene_type | " |
| At_chr10 | Cufflinks | exon | 31965687 | 31965831 | . | . | gene_id | "XLOC_017646"; | transcript_id | "Novel_000319"; | exon_number | "8";  | gene_type | " |
| At_chr10 | Cufflinks | exon | 31966475 | 31968683 | . | . | gene_id | "XLOC_017646"; | transcript_id | "Novel_000319"; | exon_number | "9";  | gene_type | " |
| At_chr10 | Cufflinks | exon | 31959429 | 31959783 | . | . | gene_id | "XLOC_017646"; | transcript_id | "Novel_000320"; | exon_number | "1";  | gene_type | " |
| At_chr10 | Cufflinks | exon | 31960224 | 31960287 | . | . | gene_id | "XLOC_017646"; | transcript_id | "Novel_000320"; | exon_number | "2";  | gene_type | " |
| At_chr10 | Cufflinks | exon | 31960453 | 31960773 | . | . | gene_id | "XLOC_017646"; | transcript_id | "Novel_000320"; | exon_number | "3";  | gene_type | " |
| At_chr10 | Cufflinks | exon | 31963595 | 31963839 | . | . | gene_id | "XLOC_017646"; | transcript_id | "Novel_000320"; | exon_number | "4";  | gene_type | " |
| At_chr10 | Cufflinks | exon | 31963941 | 31964020 | . | . | gene_id | "XLOC_017646"; | transcript_id | "Novel_000320"; | exon_number | "5";  | gene_type | " |
| At_chr10 | Cufflinks | exon | 31964289 | 31964459 | . | . | gene_id | "XLOC_017646"; | transcript_id | "Novel_000320"; | exon_number | "6";  | gene_type | " |
| At_chr10 | Cufflinks | exon | 31964595 | 31965378 | . | . | gene_id | "XLOC_017646"; | transcript_id | "Novel_000320"; | exon_number | "7";  | gene_type | " |
| At_chr10 | Cufflinks | exon | 31965687 | 31965831 | . | . | gene_id | "XLOC_017646"; | transcript_id | "Novel_000320"; | exon_number | "8";  | gene_type | " |
| At_chr10 | Cufflinks | exon | 31966475 | 31968114 | . | . | gene_id | "XLOC_017646"; | transcript_id | "Novel_000320"; | exon_number | "9";  | gene_type | " |
| At_chr10 | Cufflinks | exon | 31968438 | 31968674 | . | . | gene_id | "XLOC_017646"; | transcript_id | "Novel_000320"; | exon_number | "10"; | gene_type | " |
| At_chr10 | Cufflinks | exon | 36664550 | 36664595 | . | . | gene_id | "XLOC_017949"; | transcript_id | "Novel_000321"; | exon_number | "1";  | gene_type | " |
| At_chr10 | Cufflinks | exon | 36669182 | 36669375 | . | . | gene_id | "XLOC_017949"; | transcript_id | "Novel_000321"; | exon_number | "2";  | gene_type | " |
| At_chr10 | Cufflinks | exon | 47395571 | 47396303 | . | . | gene_id | "XLOC_018393"; | transcript_id | "Novel_000322"; | exon_number | "1";  | gene_type | " |
| At_chr10 | Cufflinks | exon | 47396413 | 47397079 | . | . | gene_id | "XLOC_018393"; | transcript_id | "Novel_000322"; | exon_number | "2";  | gene_type | " |
| At_chr10 | Cufflinks | exon | 47397222 | 47397254 | . | . | gene_id | "XLOC_018393"; | transcript_id | "Novel_000322"; | exon_number | "3";  | gene_type | " |
| At_chr10 | Cufflinks | exon | 53231718 | 53231898 | . | . | gene_id | "XLOC_018632"; | transcript_id | "Novel_000323"; | exon_number | "1";  | gene_type | " |

|          |           |      |          |          |   |   |         |                |               |                 |             |      |           |   |
|----------|-----------|------|----------|----------|---|---|---------|----------------|---------------|-----------------|-------------|------|-----------|---|
| At_chr10 | Cufflinks | exon | 53231996 | 53232064 | . | . | gene_id | "XLOC_018632"; | transcript_id | "Novel_000323"; | exon_number | "2"; | gene_type | " |
| At_chr10 | Cufflinks | exon | 53232201 | 53232299 | . | . | gene_id | "XLOC_018632"; | transcript_id | "Novel_000323"; | exon_number | "3"; | gene_type | " |
| At_chr10 | Cufflinks | exon | 53456483 | 53457707 | . | . | gene_id | "XLOC_018642"; | transcript_id | "Novel_000324"; | exon_number | "1"; | gene_type | " |
| At_chr10 | Cufflinks | exon | 53457868 | 53458017 | . | . | gene_id | "XLOC_018642"; | transcript_id | "Novel_000324"; | exon_number | "2"; | gene_type | " |
| At_chr10 | Cufflinks | exon | 53458178 | 53458275 | . | . | gene_id | "XLOC_018642"; | transcript_id | "Novel_000324"; | exon_number | "3"; | gene_type | " |
| At_chr10 | Cufflinks | exon | 53458379 | 53458519 | . | . | gene_id | "XLOC_018642"; | transcript_id | "Novel_000324"; | exon_number | "4"; | gene_type | " |
| At_chr10 | Cufflinks | exon | 53458972 | 53459094 | . | . | gene_id | "XLOC_018642"; | transcript_id | "Novel_000324"; | exon_number | "5"; | gene_type | " |
| At_chr10 | Cufflinks | exon | 66193422 | 66196057 | . | . | gene_id | "XLOC_019380"; | transcript_id | "Novel_000325"; | exon_number | "1"; | gene_type | " |
| At_chr10 | Cufflinks | exon | 66196210 | 66196324 | . | . | gene_id | "XLOC_019380"; | transcript_id | "Novel_000325"; | exon_number | "2"; | gene_type | " |
| At_chr10 | Cufflinks | exon | 66196474 | 66196711 | . | . | gene_id | "XLOC_019380"; | transcript_id | "Novel_000325"; | exon_number | "3"; | gene_type | " |
| At_chr10 | Cufflinks | exon | 66193425 | 66196057 | . | . | gene_id | "XLOC_019380"; | transcript_id | "Novel_000326"; | exon_number | "1"; | gene_type | " |
| At_chr10 | Cufflinks | exon | 66196210 | 66196284 | . | . | gene_id | "XLOC_019380"; | transcript_id | "Novel_000326"; | exon_number | "2"; | gene_type | " |
| At_chr10 | Cufflinks | exon | 66196474 | 66196720 | . | . | gene_id | "XLOC_019380"; | transcript_id | "Novel_000326"; | exon_number | "3"; | gene_type | " |
| At_chr10 | Cufflinks | exon | 68268583 | 68268861 | . | . | gene_id | "XLOC_019592"; | transcript_id | "Novel_000327"; | exon_number | "1"; | gene_type | " |
| At_chr10 | Cufflinks | exon | 68268936 | 68268971 | . | . | gene_id | "XLOC_019592"; | transcript_id | "Novel_000327"; | exon_number | "2"; | gene_type | " |
| At_chr10 | Cufflinks | exon | 68955570 | 68955897 | . | . | gene_id | "XLOC_019645"; | transcript_id | "Novel_000328"; | exon_number | "1"; | gene_type | " |
| At_chr10 | Cufflinks | exon | 68956358 | 68957120 | . | . | gene_id | "XLOC_019645"; | transcript_id | "Novel_000328"; | exon_number | "2"; | gene_type | " |
| At_chr10 | Cufflinks | exon | 68957943 | 68958211 | . | . | gene_id | "XLOC_019645"; | transcript_id | "Novel_000328"; | exon_number | "3"; | gene_type | " |
| At_chr10 | Cufflinks | exon | 68958283 | 68958513 | . | . | gene_id | "XLOC_019645"; | transcript_id | "Novel_000328"; | exon_number | "4"; | gene_type | " |
| At_chr10 | Cufflinks | exon | 68958618 | 68959358 | . | . | gene_id | "XLOC_019645"; | transcript_id | "Novel_000328"; | exon_number | "5"; | gene_type | " |
| At_chr10 | Cufflinks | exon | 68959665 | 68959837 | . | . | gene_id | "XLOC_019645"; | transcript_id | "Novel_000328"; | exon_number | "6"; | gene_type | " |
| At_chr10 | Cufflinks | exon | 68957094 | 68957120 | . | . | gene_id | "XLOC_019645"; | transcript_id | "Novel_000329"; | exon_number | "1"; | gene_type | " |
| At_chr10 | Cufflinks | exon | 68957943 | 68958211 | . | . | gene_id | "XLOC_019645"; | transcript_id | "Novel_000329"; | exon_number | "2"; | gene_type | " |
| At_chr10 | Cufflinks | exon | 68958283 | 68958513 | . | . | gene_id | "XLOC_019645"; | transcript_id | "Novel_000329"; | exon_number | "3"; | gene_type | " |
| At_chr10 | Cufflinks | exon | 68958618 | 68959643 | . | . | gene_id | "XLOC_019645"; | transcript_id | "Novel_000329"; | exon_number | "4"; | gene_type | " |
| At_chr10 | Cufflinks | exon | 68957176 | 68958211 | . | . | gene_id | "XLOC_019645"; | transcript_id | "Novel_000330"; | exon_number | "1"; | gene_type | " |
| At_chr10 | Cufflinks | exon | 68958283 | 68958513 | . | . | gene_id | "XLOC_019645"; | transcript_id | "Novel_000330"; | exon_number | "2"; | gene_type | " |
| At_chr10 | Cufflinks | exon | 68958618 | 68959358 | . | . | gene_id | "XLOC_019645"; | transcript_id | "Novel_000330"; | exon_number | "3"; | gene_type | " |
| At_chr10 | Cufflinks | exon | 68959665 | 68959786 | . | . | gene_id | "XLOC_019645"; | transcript_id | "Novel_000330"; | exon_number | "4"; | gene_type | " |
| At_chr10 | Cufflinks | exon | 69273380 | 69276854 | . | . | gene_id | "XLOC_019672"; | transcript_id | "Novel_000331"; | exon_number | "1"; | gene_type | " |
| At_chr10 | Cufflinks | exon | 69277199 | 69277255 | . | . | gene_id | "XLOC_019672"; | transcript_id | "Novel_000331"; | exon_number | "2"; | gene_type | " |
| At_chr10 | Cufflinks | exon | 69273558 | 69275754 | . | . | gene_id | "XLOC_019672"; | transcript_id | "Novel_000332"; | exon_number | "1"; | gene_type | " |
| At_chr10 | Cufflinks | exon | 69277199 | 69277364 | . | . | gene_id | "XLOC_019672"; | transcript_id | "Novel_000332"; | exon_number | "2"; | gene_type | " |
| At_chr10 | Cufflinks | exon | 70313290 | 70313564 | . | . | gene_id | "XLOC_019749"; | transcript_id | "Novel_000333"; | exon_number | "1"; | gene_type | " |
| At_chr10 | Cufflinks | exon | 76992539 | 76992972 | . | . | gene_id | "XLOC_020205"; | transcript_id | "Novel_000334"; | exon_number | "1"; | gene_type | " |

|          |           |      |          |          |   |   |   |         |                |               |                 |             |      |           |   |
|----------|-----------|------|----------|----------|---|---|---|---------|----------------|---------------|-----------------|-------------|------|-----------|---|
| At_chr10 | Cufflinks | exon | 76993056 | 76993188 | . | - | . | gene_id | "XLOC_020205"; | transcript_id | "Novel_000334"; | exon_number | "2"; | gene_type | " |
| At_chr10 | Cufflinks | exon | 76993264 | 76993307 | . | - | . | gene_id | "XLOC_020205"; | transcript_id | "Novel_000334"; | exon_number | "3"; | gene_type | " |
| At_chr10 | Cufflinks | exon | 77039688 | 77040022 | . | - | . | gene_id | "XLOC_020212"; | transcript_id | "Novel_000335"; | exon_number | "1"; | gene_type | " |
| At_chr10 | Cufflinks | exon | 77040094 | 77040255 | . | - | . | gene_id | "XLOC_020212"; | transcript_id | "Novel_000335"; | exon_number | "2"; | gene_type | " |
| At_chr10 | Cufflinks | exon | 77040979 | 77041385 | . | - | . | gene_id | "XLOC_020212"; | transcript_id | "Novel_000335"; | exon_number | "3"; | gene_type | " |
| At_chr10 | Cufflinks | exon | 78569472 | 78570054 | . | - | . | gene_id | "XLOC_020276"; | transcript_id | "Novel_000336"; | exon_number | "1"; | gene_type | " |
| At_chr10 | Cufflinks | exon | 78570205 | 78570343 | . | - | . | gene_id | "XLOC_020276"; | transcript_id | "Novel_000336"; | exon_number | "2"; | gene_type | " |
| At_chr10 | Cufflinks | exon | 78570438 | 78570651 | . | - | . | gene_id | "XLOC_020276"; | transcript_id | "Novel_000336"; | exon_number | "3"; | gene_type | " |
| At_chr10 | Cufflinks | exon | 90261275 | 90261474 | . | - | . | gene_id | "XLOC_020725"; | transcript_id | "Novel_000337"; | exon_number | "1"; | gene_type | " |
| At_chr11 | Cufflinks | exon | 1828000  | 1828085  | . | + | . | gene_id | "XLOC_021188"; | transcript_id | "Novel_000338"; | exon_number | "1"; | gene_type | " |
| At_chr11 | Cufflinks | exon | 1828285  | 1828503  | . | + | . | gene_id | "XLOC_021188"; | transcript_id | "Novel_000338"; | exon_number | "2"; | gene_type | " |
| At_chr11 | Cufflinks | exon | 1924990  | 1925095  | . | + | . | gene_id | "XLOC_021196"; | transcript_id | "Novel_000339"; | exon_number | "1"; | gene_type | " |
| At_chr11 | Cufflinks | exon | 1925192  | 1926488  | . | + | . | gene_id | "XLOC_021196"; | transcript_id | "Novel_000339"; | exon_number | "2"; | gene_type | " |
| At_chr11 | Cufflinks | exon | 3002502  | 3003013  | . | + | . | gene_id | "XLOC_021305"; | transcript_id | "Novel_000340"; | exon_number | "1"; | gene_type | " |
| At_chr11 | Cufflinks | exon | 3003106  | 3003192  | . | + | . | gene_id | "XLOC_021305"; | transcript_id | "Novel_000340"; | exon_number | "2"; | gene_type | " |
| At_chr11 | Cufflinks | exon | 3003287  | 3003389  | . | + | . | gene_id | "XLOC_021305"; | transcript_id | "Novel_000340"; | exon_number | "3"; | gene_type | " |
| At_chr11 | Cufflinks | exon | 3003959  | 3004025  | . | + | . | gene_id | "XLOC_021305"; | transcript_id | "Novel_000340"; | exon_number | "4"; | gene_type | " |
| At_chr11 | Cufflinks | exon | 3004113  | 3004354  | . | + | . | gene_id | "XLOC_021305"; | transcript_id | "Novel_000340"; | exon_number | "5"; | gene_type | " |
| At_chr11 | Cufflinks | exon | 3003607  | 3004025  | . | + | . | gene_id | "XLOC_021305"; | transcript_id | "Novel_000341"; | exon_number | "1"; | gene_type | " |
| At_chr11 | Cufflinks | exon | 3004113  | 3004332  | . | + | . | gene_id | "XLOC_021305"; | transcript_id | "Novel_000341"; | exon_number | "2"; | gene_type | " |
| At_chr11 | Cufflinks | exon | 3073011  | 3073136  | . | + | . | gene_id | "XLOC_021309"; | transcript_id | "Novel_000342"; | exon_number | "1"; | gene_type | " |
| At_chr11 | Cufflinks | exon | 3073230  | 3073357  | . | + | . | gene_id | "XLOC_021309"; | transcript_id | "Novel_000342"; | exon_number | "2"; | gene_type | " |
| At_chr11 | Cufflinks | exon | 3177498  | 3179174  | . | + | . | gene_id | "XLOC_021330"; | transcript_id | "Novel_000343"; | exon_number | "1"; | gene_type | " |
| At_chr11 | Cufflinks | exon | 3179324  | 3179363  | . | + | . | gene_id | "XLOC_021330"; | transcript_id | "Novel_000343"; | exon_number | "2"; | gene_type | " |
| At_chr11 | Cufflinks | exon | 3534818  | 3535207  | . | + | . | gene_id | "XLOC_021372"; | transcript_id | "Novel_000344"; | exon_number | "1"; | gene_type | " |
| At_chr11 | Cufflinks | exon | 3535480  | 3535996  | . | + | . | gene_id | "XLOC_021372"; | transcript_id | "Novel_000344"; | exon_number | "2"; | gene_type | " |
| At_chr11 | Cufflinks | exon | 6860251  | 6860383  | . | + | . | gene_id | "XLOC_021577"; | transcript_id | "Novel_000345"; | exon_number | "1"; | gene_type | " |
| At_chr11 | Cufflinks | exon | 6860512  | 6860575  | . | + | . | gene_id | "XLOC_021577"; | transcript_id | "Novel_000345"; | exon_number | "2"; | gene_type | " |
| At_chr11 | Cufflinks | exon | 6860687  | 6860909  | . | + | . | gene_id | "XLOC_021577"; | transcript_id | "Novel_000345"; | exon_number | "3"; | gene_type | " |
| At_chr11 | Cufflinks | exon | 7818983  | 7819073  | . | + | . | gene_id | "XLOC_021731"; | transcript_id | "Novel_000346"; | exon_number | "1"; | gene_type | " |
| At_chr11 | Cufflinks | exon | 7819174  | 7819291  | . | + | . | gene_id | "XLOC_021731"; | transcript_id | "Novel_000346"; | exon_number | "2"; | gene_type | " |
| At_chr11 | Cufflinks | exon | 7820767  | 7821279  | . | + | . | gene_id | "XLOC_021731"; | transcript_id | "Novel_000346"; | exon_number | "3"; | gene_type | " |
| At_chr11 | Cufflinks | exon | 10943903 | 10944090 | . | + | . | gene_id | "XLOC_021964"; | transcript_id | "Novel_000347"; | exon_number | "1"; | gene_type | " |
| At_chr11 | Cufflinks | exon | 10960852 | 10960876 | . | + | . | gene_id | "XLOC_021964"; | transcript_id | "Novel_000347"; | exon_number | "2"; | gene_type | " |
| At_chr11 | Cufflinks | exon | 10943905 | 10944142 | . | + | . | gene_id | "XLOC_021964"; | transcript_id | "Novel_000348"; | exon_number | "1"; | gene_type | " |

|          |           |      |          |          |   |   |   |         |                |               |                 |             |      |           |   |
|----------|-----------|------|----------|----------|---|---|---|---------|----------------|---------------|-----------------|-------------|------|-----------|---|
| At_chr11 | Cufflinks | exon | 10944229 | 10944810 | . | + | . | gene_id | "XLOC_021964"; | transcript_id | "Novel_000348"; | exon_number | "2"; | gene_type | " |
| At_chr11 | Cufflinks | exon | 10995175 | 10995644 | . | + | . | gene_id | "XLOC_021968"; | transcript_id | "Novel_000349"; | exon_number | "1"; | gene_type | " |
| At_chr11 | Cufflinks | exon | 10995729 | 10996274 | . | + | . | gene_id | "XLOC_021968"; | transcript_id | "Novel_000349"; | exon_number | "2"; | gene_type | " |
| At_chr11 | Cufflinks | exon | 12584180 | 12585355 | . | + | . | gene_id | "XLOC_022083"; | transcript_id | "Novel_000350"; | exon_number | "1"; | gene_type | " |
| At_chr11 | Cufflinks | exon | 12585526 | 12588595 | . | + | . | gene_id | "XLOC_022083"; | transcript_id | "Novel_000350"; | exon_number | "2"; | gene_type | " |
| At_chr11 | Cufflinks | exon | 12887008 | 12887212 | . | + | . | gene_id | "XLOC_022098"; | transcript_id | "Novel_000351"; | exon_number | "1"; | gene_type | " |
| At_chr11 | Cufflinks | exon | 12888359 | 12889297 | . | + | . | gene_id | "XLOC_022098"; | transcript_id | "Novel_000351"; | exon_number | "2"; | gene_type | " |
| At_chr11 | Cufflinks | exon | 12889413 | 12889470 | . | + | . | gene_id | "XLOC_022098"; | transcript_id | "Novel_000351"; | exon_number | "3"; | gene_type | " |
| At_chr11 | Cufflinks | exon | 12889600 | 12889715 | . | + | . | gene_id | "XLOC_022098"; | transcript_id | "Novel_000351"; | exon_number | "4"; | gene_type | " |
| At_chr11 | Cufflinks | exon | 12890844 | 12890980 | . | + | . | gene_id | "XLOC_022098"; | transcript_id | "Novel_000351"; | exon_number | "5"; | gene_type | " |
| At_chr11 | Cufflinks | exon | 12891107 | 12893136 | . | + | . | gene_id | "XLOC_022098"; | transcript_id | "Novel_000351"; | exon_number | "6"; | gene_type | " |
| At_chr11 | Cufflinks | exon | 15006480 | 15006830 | . | + | . | gene_id | "XLOC_022222"; | transcript_id | "Novel_000352"; | exon_number | "1"; | gene_type | " |
| At_chr11 | Cufflinks | exon | 15006939 | 15007557 | . | + | . | gene_id | "XLOC_022222"; | transcript_id | "Novel_000352"; | exon_number | "2"; | gene_type | " |
| At_chr11 | Cufflinks | exon | 15109300 | 15109638 | . | + | . | gene_id | "XLOC_022231"; | transcript_id | "Novel_000353"; | exon_number | "1"; | gene_type | " |
| At_chr11 | Cufflinks | exon | 15109993 | 15110169 | . | + | . | gene_id | "XLOC_022231"; | transcript_id | "Novel_000353"; | exon_number | "2"; | gene_type | " |
| At_chr11 | Cufflinks | exon | 20957914 | 20958082 | . | + | . | gene_id | "XLOC_022512"; | transcript_id | "Novel_000354"; | exon_number | "1"; | gene_type | " |
| At_chr11 | Cufflinks | exon | 20958522 | 20958624 | . | + | . | gene_id | "XLOC_022512"; | transcript_id | "Novel_000354"; | exon_number | "2"; | gene_type | " |
| At_chr11 | Cufflinks | exon | 20959101 | 20959973 | . | + | . | gene_id | "XLOC_022512"; | transcript_id | "Novel_000354"; | exon_number | "3"; | gene_type | " |
| At_chr11 | Cufflinks | exon | 20960289 | 20960389 | . | + | . | gene_id | "XLOC_022512"; | transcript_id | "Novel_000354"; | exon_number | "4"; | gene_type | " |
| At_chr11 | Cufflinks | exon | 20960486 | 20960600 | . | + | . | gene_id | "XLOC_022512"; | transcript_id | "Novel_000354"; | exon_number | "5"; | gene_type | " |
| At_chr11 | Cufflinks | exon | 20960821 | 20960898 | . | + | . | gene_id | "XLOC_022512"; | transcript_id | "Novel_000354"; | exon_number | "6"; | gene_type | " |
| At_chr11 | Cufflinks | exon | 20961059 | 20961151 | . | + | . | gene_id | "XLOC_022512"; | transcript_id | "Novel_000354"; | exon_number | "7"; | gene_type | " |
| At_chr11 | Cufflinks | exon | 20961360 | 20961396 | . | + | . | gene_id | "XLOC_022512"; | transcript_id | "Novel_000354"; | exon_number | "8"; | gene_type | " |
| At_chr11 | Cufflinks | exon | 20958008 | 20958082 | . | + | . | gene_id | "XLOC_022512"; | transcript_id | "Novel_000355"; | exon_number | "1"; | gene_type | " |
| At_chr11 | Cufflinks | exon | 20958519 | 20958624 | . | + | . | gene_id | "XLOC_022512"; | transcript_id | "Novel_000355"; | exon_number | "2"; | gene_type | " |
| At_chr11 | Cufflinks | exon | 20959101 | 20959973 | . | + | . | gene_id | "XLOC_022512"; | transcript_id | "Novel_000355"; | exon_number | "3"; | gene_type | " |
| At_chr11 | Cufflinks | exon | 20960289 | 20960389 | . | + | . | gene_id | "XLOC_022512"; | transcript_id | "Novel_000355"; | exon_number | "4"; | gene_type | " |
| At_chr11 | Cufflinks | exon | 20960486 | 20960600 | . | + | . | gene_id | "XLOC_022512"; | transcript_id | "Novel_000355"; | exon_number | "5"; | gene_type | " |
| At_chr11 | Cufflinks | exon | 20960821 | 20960898 | . | + | . | gene_id | "XLOC_022512"; | transcript_id | "Novel_000355"; | exon_number | "6"; | gene_type | " |
| At_chr11 | Cufflinks | exon | 20961059 | 20961151 | . | + | . | gene_id | "XLOC_022512"; | transcript_id | "Novel_000355"; | exon_number | "7"; | gene_type | " |
| At_chr11 | Cufflinks | exon | 20961355 | 20961684 | . | + | . | gene_id | "XLOC_022512"; | transcript_id | "Novel_000355"; | exon_number | "8"; | gene_type | " |
| At_chr11 | Cufflinks | exon | 20961533 | 20962117 | . | + | . | gene_id | "XLOC_022512"; | transcript_id | "Novel_000356"; | exon_number | "1"; | gene_type | " |
| At_chr11 | Cufflinks | exon | 20962671 | 20962733 | . | + | . | gene_id | "XLOC_022512"; | transcript_id | "Novel_000356"; | exon_number | "2"; | gene_type | " |
| At_chr11 | Cufflinks | exon | 20962951 | 20962981 | . | + | . | gene_id | "XLOC_022512"; | transcript_id | "Novel_000356"; | exon_number | "3"; | gene_type | " |
| At_chr11 | Cufflinks | exon | 20963205 | 20963251 | . | + | . | gene_id | "XLOC_022512"; | transcript_id | "Novel_000356"; | exon_number | "4"; | gene_type | " |



|          |           |      |          |          |   |   |   |         |                |               |                 |             |      |           |   |
|----------|-----------|------|----------|----------|---|---|---|---------|----------------|---------------|-----------------|-------------|------|-----------|---|
| At_chr11 | Cufflinks | exon | 22171216 | 22171291 | . | + | . | gene_id | "XLOC_022597"; | transcript_id | "Novel_000364"; | exon_number | "8"; | gene_type | " |
| At_chr11 | Cufflinks | exon | 22165527 | 22165781 | . | + | . | gene_id | "XLOC_022597"; | transcript_id | "Novel_000365"; | exon_number | "1"; | gene_type | " |
| At_chr11 | Cufflinks | exon | 22165871 | 22165989 | . | + | . | gene_id | "XLOC_022597"; | transcript_id | "Novel_000365"; | exon_number | "2"; | gene_type | " |
| At_chr11 | Cufflinks | exon | 22167055 | 22168559 | . | + | . | gene_id | "XLOC_022597"; | transcript_id | "Novel_000365"; | exon_number | "3"; | gene_type | " |
| At_chr11 | Cufflinks | exon | 22169945 | 22170060 | . | + | . | gene_id | "XLOC_022597"; | transcript_id | "Novel_000365"; | exon_number | "4"; | gene_type | " |
| At_chr11 | Cufflinks | exon | 22170792 | 22170960 | . | + | . | gene_id | "XLOC_022597"; | transcript_id | "Novel_000365"; | exon_number | "5"; | gene_type | " |
| At_chr11 | Cufflinks | exon | 22171216 | 22171313 | . | + | . | gene_id | "XLOC_022597"; | transcript_id | "Novel_000365"; | exon_number | "6"; | gene_type | " |
| At_chr11 | Cufflinks | exon | 22171453 | 22173994 | . | + | . | gene_id | "XLOC_022601"; | transcript_id | "Novel_000366"; | exon_number | "1"; | gene_type | " |
| At_chr11 | Cufflinks | exon | 22174803 | 22175001 | . | + | . | gene_id | "XLOC_022601"; | transcript_id | "Novel_000366"; | exon_number | "2"; | gene_type | " |
| At_chr11 | Cufflinks | exon | 22178081 | 22178159 | . | + | . | gene_id | "XLOC_022601"; | transcript_id | "Novel_000367"; | exon_number | "1"; | gene_type | " |
| At_chr11 | Cufflinks | exon | 22179145 | 22179330 | . | + | . | gene_id | "XLOC_022601"; | transcript_id | "Novel_000367"; | exon_number | "2"; | gene_type | " |
| At_chr11 | Cufflinks | exon | 22179551 | 22180315 | . | + | . | gene_id | "XLOC_022602"; | transcript_id | "Novel_000368"; | exon_number | "1"; | gene_type | " |
| At_chr11 | Cufflinks | exon | 22180457 | 22180573 | . | + | . | gene_id | "XLOC_022602"; | transcript_id | "Novel_000368"; | exon_number | "2"; | gene_type | " |
| At_chr11 | Cufflinks | exon | 22180816 | 22180872 | . | + | . | gene_id | "XLOC_022602"; | transcript_id | "Novel_000368"; | exon_number | "3"; | gene_type | " |
| At_chr11 | Cufflinks | exon | 22180957 | 22181747 | . | + | . | gene_id | "XLOC_022602"; | transcript_id | "Novel_000368"; | exon_number | "4"; | gene_type | " |
| At_chr11 | Cufflinks | exon | 22218446 | 22218973 | . | + | . | gene_id | "XLOC_022609"; | transcript_id | "Novel_000369"; | exon_number | "1"; | gene_type | " |
| At_chr11 | Cufflinks | exon | 22219046 | 22219595 | . | + | . | gene_id | "XLOC_022609"; | transcript_id | "Novel_000369"; | exon_number | "2"; | gene_type | " |
| At_chr11 | Cufflinks | exon | 22219713 | 22220296 | . | + | . | gene_id | "XLOC_022609"; | transcript_id | "Novel_000369"; | exon_number | "3"; | gene_type | " |
| At_chr11 | Cufflinks | exon | 22220384 | 22220533 | . | + | . | gene_id | "XLOC_022609"; | transcript_id | "Novel_000369"; | exon_number | "4"; | gene_type | " |
| At_chr11 | Cufflinks | exon | 22220650 | 22222152 | . | + | . | gene_id | "XLOC_022609"; | transcript_id | "Novel_000369"; | exon_number | "5"; | gene_type | " |
| At_chr11 | Cufflinks | exon | 22218616 | 22219447 | . | + | . | gene_id | "XLOC_022609"; | transcript_id | "Novel_000370"; | exon_number | "1"; | gene_type | " |
| At_chr11 | Cufflinks | exon | 22219530 | 22219595 | . | + | . | gene_id | "XLOC_022609"; | transcript_id | "Novel_000370"; | exon_number | "2"; | gene_type | " |
| At_chr11 | Cufflinks | exon | 22219713 | 22219846 | . | + | . | gene_id | "XLOC_022609"; | transcript_id | "Novel_000370"; | exon_number | "3"; | gene_type | " |
| At_chr11 | Cufflinks | exon | 22219441 | 22219595 | . | + | . | gene_id | "XLOC_022609"; | transcript_id | "Novel_000371"; | exon_number | "1"; | gene_type | " |
| At_chr11 | Cufflinks | exon | 22219713 | 22219868 | . | + | . | gene_id | "XLOC_022609"; | transcript_id | "Novel_000371"; | exon_number | "2"; | gene_type | " |
| At_chr11 | Cufflinks | exon | 22219993 | 22220067 | . | + | . | gene_id | "XLOC_022609"; | transcript_id | "Novel_000371"; | exon_number | "3"; | gene_type | " |
| At_chr11 | Cufflinks | exon | 22220141 | 22220296 | . | + | . | gene_id | "XLOC_022609"; | transcript_id | "Novel_000371"; | exon_number | "4"; | gene_type | " |
| At_chr11 | Cufflinks | exon | 22220384 | 22220533 | . | + | . | gene_id | "XLOC_022609"; | transcript_id | "Novel_000371"; | exon_number | "5"; | gene_type | " |
| At_chr11 | Cufflinks | exon | 22220650 | 2222211  | . | + | . | gene_id | "XLOC_022609"; | transcript_id | "Novel_000371"; | exon_number | "6"; | gene_type | " |
| At_chr11 | Cufflinks | exon | 23174421 | 23174658 | . | + | . | gene_id | "XLOC_022639"; | transcript_id | "Novel_000372"; | exon_number | "1"; | gene_type | " |
| At_chr11 | Cufflinks | exon | 23175329 | 23175524 | . | + | . | gene_id | "XLOC_022639"; | transcript_id | "Novel_000372"; | exon_number | "2"; | gene_type | " |
| At_chr11 | Cufflinks | exon | 23176144 | 23176252 | . | + | . | gene_id | "XLOC_022639"; | transcript_id | "Novel_000372"; | exon_number | "3"; | gene_type | " |
| At_chr11 | Cufflinks | exon | 23178284 | 23178654 | . | + | . | gene_id | "XLOC_022639"; | transcript_id | "Novel_000372"; | exon_number | "4"; | gene_type | " |
| At_chr11 | Cufflinks | exon | 24011137 | 24011291 | . | + | . | gene_id | "XLOC_022673"; | transcript_id | "Novel_000373"; | exon_number | "1"; | gene_type | " |
| At_chr11 | Cufflinks | exon | 24012379 | 24013049 | . | + | . | gene_id | "XLOC_022673"; | transcript_id | "Novel_000373"; | exon_number | "2"; | gene_type | " |





|          |           |      |          |          |   |   |   |         |                |               |                 |             |       |           |   |
|----------|-----------|------|----------|----------|---|---|---|---------|----------------|---------------|-----------------|-------------|-------|-----------|---|
| At_chr11 | Cufflinks | exon | 27843916 | 27844040 | . | + | . | gene_id | "XLOC_022885"; | transcript_id | "Novel_000376"; | exon_number | "9";  | gene_type | " |
| At_chr11 | Cufflinks | exon | 27844286 | 27844417 | . | + | . | gene_id | "XLOC_022885"; | transcript_id | "Novel_000376"; | exon_number | "10"; | gene_type | " |
| At_chr11 | Cufflinks | exon | 27845178 | 27845602 | . | + | . | gene_id | "XLOC_022885"; | transcript_id | "Novel_000376"; | exon_number | "11"; | gene_type | " |
| At_chr11 | Cufflinks | exon | 27842911 | 27843155 | . | + | . | gene_id | "XLOC_022885"; | transcript_id | "Novel_000377"; | exon_number | "1";  | gene_type | " |
| At_chr11 | Cufflinks | exon | 27843266 | 27843394 | . | + | . | gene_id | "XLOC_022885"; | transcript_id | "Novel_000377"; | exon_number | "2";  | gene_type | " |
| At_chr11 | Cufflinks | exon | 27843506 | 27843591 | . | + | . | gene_id | "XLOC_022885"; | transcript_id | "Novel_000377"; | exon_number | "3";  | gene_type | " |
| At_chr11 | Cufflinks | exon | 27843916 | 27844040 | . | + | . | gene_id | "XLOC_022885"; | transcript_id | "Novel_000377"; | exon_number | "4";  | gene_type | " |
| At_chr11 | Cufflinks | exon | 27844286 | 27844417 | . | + | . | gene_id | "XLOC_022885"; | transcript_id | "Novel_000377"; | exon_number | "5";  | gene_type | " |
| At_chr11 | Cufflinks | exon | 27845178 | 27845684 | . | + | . | gene_id | "XLOC_022885"; | transcript_id | "Novel_000377"; | exon_number | "6";  | gene_type | " |
| At_chr11 | Cufflinks | exon | 29660526 | 29660851 | . | + | . | gene_id | "XLOC_022979"; | transcript_id | "Novel_000378"; | exon_number | "1";  | gene_type | " |
| At_chr11 | Cufflinks | exon | 29661245 | 29661581 | . | + | . | gene_id | "XLOC_022979"; | transcript_id | "Novel_000378"; | exon_number | "2";  | gene_type | " |
| At_chr11 | Cufflinks | exon | 31199488 | 31199767 | . | + | . | gene_id | "XLOC_023066"; | transcript_id | "Novel_000379"; | exon_number | "1";  | gene_type | " |
| At_chr11 | Cufflinks | exon | 31200288 | 31200747 | . | + | . | gene_id | "XLOC_023066"; | transcript_id | "Novel_000379"; | exon_number | "2";  | gene_type | " |
| At_chr11 | Cufflinks | exon | 31200840 | 31203070 | . | + | . | gene_id | "XLOC_023066"; | transcript_id | "Novel_000379"; | exon_number | "3";  | gene_type | " |
| At_chr11 | Cufflinks | exon | 31199488 | 31199767 | . | + | . | gene_id | "XLOC_023066"; | transcript_id | "Novel_000380"; | exon_number | "1";  | gene_type | " |
| At_chr11 | Cufflinks | exon | 31200288 | 31203070 | . | + | . | gene_id | "XLOC_023066"; | transcript_id | "Novel_000380"; | exon_number | "2";  | gene_type | " |
| At_chr11 | Cufflinks | exon | 40143475 | 40146159 | . | + | . | gene_id | "XLOC_023521"; | transcript_id | "Novel_000381"; | exon_number | "1";  | gene_type | " |
| At_chr11 | Cufflinks | exon | 40161940 | 40162129 | . | + | . | gene_id | "XLOC_023522"; | transcript_id | "Novel_000382"; | exon_number | "1";  | gene_type | " |
| At_chr11 | Cufflinks | exon | 40162242 | 40162361 | . | + | . | gene_id | "XLOC_023522"; | transcript_id | "Novel_000382"; | exon_number | "2";  | gene_type | " |
| At_chr11 | Cufflinks | exon | 46267507 | 46268055 | . | + | . | gene_id | "XLOC_023686"; | transcript_id | "Novel_000383"; | exon_number | "1";  | gene_type | " |
| At_chr11 | Cufflinks | exon | 46268138 | 46268215 | . | + | . | gene_id | "XLOC_023686"; | transcript_id | "Novel_000383"; | exon_number | "2";  | gene_type | " |
| At_chr11 | Cufflinks | exon | 46268594 | 46268701 | . | + | . | gene_id | "XLOC_023686"; | transcript_id | "Novel_000383"; | exon_number | "3";  | gene_type | " |
| At_chr11 | Cufflinks | exon | 46268942 | 46269004 | . | + | . | gene_id | "XLOC_023686"; | transcript_id | "Novel_000383"; | exon_number | "4";  | gene_type | " |
| At_chr11 | Cufflinks | exon | 46269114 | 46269275 | . | + | . | gene_id | "XLOC_023686"; | transcript_id | "Novel_000383"; | exon_number | "5";  | gene_type | " |
| At_chr11 | Cufflinks | exon | 46269921 | 46270022 | . | + | . | gene_id | "XLOC_023686"; | transcript_id | "Novel_000383"; | exon_number | "6";  | gene_type | " |
| At_chr11 | Cufflinks | exon | 46270128 | 46270170 | . | + | . | gene_id | "XLOC_023686"; | transcript_id | "Novel_000383"; | exon_number | "7";  | gene_type | " |
| At_chr11 | Cufflinks | exon | 46270266 | 46270583 | . | + | . | gene_id | "XLOC_023686"; | transcript_id | "Novel_000383"; | exon_number | "8";  | gene_type | " |
| At_chr11 | Cufflinks | exon | 46270679 | 46270843 | . | + | . | gene_id | "XLOC_023686"; | transcript_id | "Novel_000383"; | exon_number | "9";  | gene_type | " |
| At_chr11 | Cufflinks | exon | 46271339 | 46273239 | . | + | . | gene_id | "XLOC_023686"; | transcript_id | "Novel_000383"; | exon_number | "10"; | gene_type | " |
| At_chr11 | Cufflinks | exon | 51187931 | 51188224 | . | + | . | gene_id | "XLOC_023861"; | transcript_id | "Novel_000384"; | exon_number | "1";  | gene_type | " |
| At_chr11 | Cufflinks | exon | 57122164 | 57122491 | . | + | . | gene_id | "XLOC_024226"; | transcript_id | "Novel_000385"; | exon_number | "1";  | gene_type | " |
| At_chr11 | Cufflinks | exon | 57122666 | 57122762 | . | + | . | gene_id | "XLOC_024226"; | transcript_id | "Novel_000385"; | exon_number | "2";  | gene_type | " |
| At_chr11 | Cufflinks | exon | 57123367 | 57125288 | . | + | . | gene_id | "XLOC_024226"; | transcript_id | "Novel_000385"; | exon_number | "3";  | gene_type | " |
| At_chr11 | Cufflinks | exon | 57122286 | 57122491 | . | + | . | gene_id | "XLOC_024226"; | transcript_id | "Novel_000386"; | exon_number | "1";  | gene_type | " |
| At_chr11 | Cufflinks | exon | 57122666 | 57125305 | . | + | . | gene_id | "XLOC_024226"; | transcript_id | "Novel_000386"; | exon_number | "2";  | gene_type | " |

|          |           |      |          |          |   |   |   |         |                |               |                 |             |      |           |   |
|----------|-----------|------|----------|----------|---|---|---|---------|----------------|---------------|-----------------|-------------|------|-----------|---|
| At_chr11 | Cufflinks | exon | 58053660 | 58053772 | . | + | . | gene_id | "XLOC_024320"; | transcript_id | "Novel_000387"; | exon_number | "1"; | gene_type | " |
| At_chr11 | Cufflinks | exon | 58053856 | 58054495 | . | + | . | gene_id | "XLOC_024320"; | transcript_id | "Novel_000387"; | exon_number | "2"; | gene_type | " |
| At_chr11 | Cufflinks | exon | 60569214 | 60569361 | . | + | . | gene_id | "XLOC_024424"; | transcript_id | "Novel_000388"; | exon_number | "1"; | gene_type | " |
| At_chr11 | Cufflinks | exon | 60569641 | 60570070 | . | + | . | gene_id | "XLOC_024424"; | transcript_id | "Novel_000388"; | exon_number | "2"; | gene_type | " |
| At_chr11 | Cufflinks | exon | 63301188 | 63302091 | . | + | . | gene_id | "XLOC_024657"; | transcript_id | "Novel_000389"; | exon_number | "1"; | gene_type | " |
| At_chr11 | Cufflinks | exon | 71626823 | 71627216 | . | + | . | gene_id | "XLOC_025229"; | transcript_id | "Novel_000390"; | exon_number | "1"; | gene_type | " |
| At_chr11 | Cufflinks | exon | 71627346 | 71627525 | . | + | . | gene_id | "XLOC_025229"; | transcript_id | "Novel_000390"; | exon_number | "2"; | gene_type | " |
| At_chr11 | Cufflinks | exon | 71627915 | 71628092 | . | + | . | gene_id | "XLOC_025229"; | transcript_id | "Novel_000390"; | exon_number | "3"; | gene_type | " |
| At_chr11 | Cufflinks | exon | 86443930 | 86444305 | . | + | . | gene_id | "XLOC_025661"; | transcript_id | "Novel_000391"; | exon_number | "1"; | gene_type | " |
| At_chr11 | Cufflinks | exon | 86445193 | 86445477 | . | + | . | gene_id | "XLOC_025661"; | transcript_id | "Novel_000391"; | exon_number | "2"; | gene_type | " |
| At_chr11 | Cufflinks | exon | 86445632 | 86445708 | . | + | . | gene_id | "XLOC_025661"; | transcript_id | "Novel_000391"; | exon_number | "3"; | gene_type | " |
| At_chr11 | Cufflinks | exon | 86445789 | 86445805 | . | + | . | gene_id | "XLOC_025661"; | transcript_id | "Novel_000391"; | exon_number | "4"; | gene_type | " |
| At_chr11 | Cufflinks | exon | 86443962 | 86444305 | . | + | . | gene_id | "XLOC_025661"; | transcript_id | "Novel_000392"; | exon_number | "1"; | gene_type | " |
| At_chr11 | Cufflinks | exon | 86445193 | 86445576 | . | + | . | gene_id | "XLOC_025661"; | transcript_id | "Novel_000392"; | exon_number | "2"; | gene_type | " |
| At_chr11 | Cufflinks | exon | 91285823 | 91286207 | . | + | . | gene_id | "XLOC_025893"; | transcript_id | "Novel_000393"; | exon_number | "1"; | gene_type | " |
| At_chr11 | Cufflinks | exon | 91288257 | 91290049 | . | + | . | gene_id | "XLOC_025893"; | transcript_id | "Novel_000393"; | exon_number | "2"; | gene_type | " |
| At_chr11 | Cufflinks | exon | 94561008 | 94561867 | . | + | . | gene_id | "XLOC_026055"; | transcript_id | "Novel_000394"; | exon_number | "1"; | gene_type | " |
| At_chr11 | Cufflinks | exon | 94562340 | 94563205 | . | + | . | gene_id | "XLOC_026055"; | transcript_id | "Novel_000394"; | exon_number | "2"; | gene_type | " |
| At_chr11 | Cufflinks | exon | 94561008 | 94561653 | . | + | . | gene_id | "XLOC_026055"; | transcript_id | "Novel_000395"; | exon_number | "1"; | gene_type | " |
| At_chr11 | Cufflinks | exon | 94561745 | 94561867 | . | + | . | gene_id | "XLOC_026055"; | transcript_id | "Novel_000395"; | exon_number | "2"; | gene_type | " |
| At_chr11 | Cufflinks | exon | 94562340 | 94563205 | . | + | . | gene_id | "XLOC_026055"; | transcript_id | "Novel_000395"; | exon_number | "3"; | gene_type | " |
| At_chr11 | Cufflinks | exon | 95146912 | 95147354 | . | + | . | gene_id | "XLOC_026082"; | transcript_id | "Novel_000396"; | exon_number | "1"; | gene_type | " |
| At_chr11 | Cufflinks | exon | 95147434 | 95147473 | . | + | . | gene_id | "XLOC_026082"; | transcript_id | "Novel_000396"; | exon_number | "2"; | gene_type | " |
| At_chr11 | Cufflinks | exon | 95147582 | 95148681 | . | + | . | gene_id | "XLOC_026082"; | transcript_id | "Novel_000396"; | exon_number | "3"; | gene_type | " |
| At_chr11 | Cufflinks | exon | 95146940 | 95147473 | . | + | . | gene_id | "XLOC_026082"; | transcript_id | "Novel_000397"; | exon_number | "1"; | gene_type | " |
| At_chr11 | Cufflinks | exon | 95147582 | 95148490 | . | + | . | gene_id | "XLOC_026082"; | transcript_id | "Novel_000397"; | exon_number | "2"; | gene_type | " |
| At_chr11 | Cufflinks | exon | 96048007 | 96049291 | . | + | . | gene_id | "XLOC_026128"; | transcript_id | "Novel_000398"; | exon_number | "1"; | gene_type | " |
| At_chr11 | Cufflinks | exon | 96049398 | 96049552 | . | + | . | gene_id | "XLOC_026128"; | transcript_id | "Novel_000398"; | exon_number | "2"; | gene_type | " |
| At_chr11 | Cufflinks | exon | 96048202 | 96048489 | . | + | . | gene_id | "XLOC_026128"; | transcript_id | "Novel_000399"; | exon_number | "1"; | gene_type | " |
| At_chr11 | Cufflinks | exon | 96048646 | 96048706 | . | + | . | gene_id | "XLOC_026128"; | transcript_id | "Novel_000399"; | exon_number | "2"; | gene_type | " |
| At_chr11 | Cufflinks | exon | 96048788 | 96048903 | . | + | . | gene_id | "XLOC_026128"; | transcript_id | "Novel_000399"; | exon_number | "3"; | gene_type | " |
| At_chr11 | Cufflinks | exon | 96048995 | 96049291 | . | + | . | gene_id | "XLOC_026128"; | transcript_id | "Novel_000399"; | exon_number | "4"; | gene_type | " |
| At_chr11 | Cufflinks | exon | 96049398 | 96049566 | . | + | . | gene_id | "XLOC_026128"; | transcript_id | "Novel_000399"; | exon_number | "5"; | gene_type | " |
| At_chr11 | Cufflinks | exon | 99155028 | 99155329 | . | + | . | gene_id | "XLOC_026227"; | transcript_id | "Novel_000400"; | exon_number | "1"; | gene_type | " |
| At_chr11 | Cufflinks | exon | 99155607 | 99155697 | . | + | . | gene_id | "XLOC_026227"; | transcript_id | "Novel_000400"; | exon_number | "2"; | gene_type | " |

|          |           |      |          |          |   |   |   |         |                |               |                 |             |       |           |   |
|----------|-----------|------|----------|----------|---|---|---|---------|----------------|---------------|-----------------|-------------|-------|-----------|---|
| At_chr11 | Cufflinks | exon | 99156234 | 99156332 | . | + | . | gene_id | "XLOC_026227"; | transcript_id | "Novel_000400"; | exon_number | "3";  | gene_type | " |
| At_chr11 | Cufflinks | exon | 99156456 | 99156567 | . | + | . | gene_id | "XLOC_026227"; | transcript_id | "Novel_000400"; | exon_number | "4";  | gene_type | " |
| At_chr11 | Cufflinks | exon | 99156701 | 99156856 | . | + | . | gene_id | "XLOC_026227"; | transcript_id | "Novel_000400"; | exon_number | "5";  | gene_type | " |
| At_chr11 | Cufflinks | exon | 99157616 | 99157720 | . | + | . | gene_id | "XLOC_026227"; | transcript_id | "Novel_000400"; | exon_number | "6";  | gene_type | " |
| At_chr11 | Cufflinks | exon | 99157943 | 99158026 | . | + | . | gene_id | "XLOC_026227"; | transcript_id | "Novel_000400"; | exon_number | "7";  | gene_type | " |
| At_chr11 | Cufflinks | exon | 99158114 | 99158229 | . | + | . | gene_id | "XLOC_026227"; | transcript_id | "Novel_000400"; | exon_number | "8";  | gene_type | " |
| At_chr11 | Cufflinks | exon | 99158343 | 99158641 | . | + | . | gene_id | "XLOC_026227"; | transcript_id | "Novel_000400"; | exon_number | "9";  | gene_type | " |
| At_chr11 | Cufflinks | exon | 99158771 | 99158827 | . | + | . | gene_id | "XLOC_026227"; | transcript_id | "Novel_000400"; | exon_number | "10"; | gene_type | " |
| At_chr11 | Cufflinks | exon | 99158926 | 99158992 | . | + | . | gene_id | "XLOC_026227"; | transcript_id | "Novel_000400"; | exon_number | "11"; | gene_type | " |
| At_chr11 | Cufflinks | exon | 99159076 | 99159129 | . | + | . | gene_id | "XLOC_026227"; | transcript_id | "Novel_000400"; | exon_number | "12"; | gene_type | " |
| At_chr11 | Cufflinks | exon | 99159227 | 99159301 | . | + | . | gene_id | "XLOC_026227"; | transcript_id | "Novel_000400"; | exon_number | "13"; | gene_type | " |
| At_chr11 | Cufflinks | exon | 99159381 | 99159416 | . | + | . | gene_id | "XLOC_026227"; | transcript_id | "Novel_000400"; | exon_number | "14"; | gene_type | " |
| At_chr11 | Cufflinks | exon | 99159492 | 99160607 | . | + | . | gene_id | "XLOC_026227"; | transcript_id | "Novel_000400"; | exon_number | "15"; | gene_type | " |
| At_chr11 | Cufflinks | exon | 99155374 | 99155697 | . | + | . | gene_id | "XLOC_026227"; | transcript_id | "Novel_000401"; | exon_number | "1";  | gene_type | " |
| At_chr11 | Cufflinks | exon | 99156234 | 99156332 | . | + | . | gene_id | "XLOC_026227"; | transcript_id | "Novel_000401"; | exon_number | "2";  | gene_type | " |
| At_chr11 | Cufflinks | exon | 99156456 | 99156567 | . | + | . | gene_id | "XLOC_026227"; | transcript_id | "Novel_000401"; | exon_number | "3";  | gene_type | " |
| At_chr11 | Cufflinks | exon | 99156701 | 99156856 | . | + | . | gene_id | "XLOC_026227"; | transcript_id | "Novel_000401"; | exon_number | "4";  | gene_type | " |
| At_chr11 | Cufflinks | exon | 99157616 | 99157720 | . | + | . | gene_id | "XLOC_026227"; | transcript_id | "Novel_000401"; | exon_number | "5";  | gene_type | " |
| At_chr11 | Cufflinks | exon | 99157943 | 99158026 | . | + | . | gene_id | "XLOC_026227"; | transcript_id | "Novel_000401"; | exon_number | "6";  | gene_type | " |
| At_chr11 | Cufflinks | exon | 99158114 | 99158152 | . | + | . | gene_id | "XLOC_026227"; | transcript_id | "Novel_000401"; | exon_number | "7";  | gene_type | " |
| At_chr11 | Cufflinks | exon | 278713   | 279941   | . | - | . | gene_id | "XLOC_026386"; | transcript_id | "Novel_000402"; | exon_number | "1";  | gene_type | " |
| At_chr11 | Cufflinks | exon | 280202   | 280368   | . | - | . | gene_id | "XLOC_026386"; | transcript_id | "Novel_000402"; | exon_number | "2";  | gene_type | " |
| At_chr11 | Cufflinks | exon | 1061895  | 1064942  | . | - | . | gene_id | "XLOC_026490"; | transcript_id | "Novel_000403"; | exon_number | "1";  | gene_type | " |
| At_chr11 | Cufflinks | exon | 1065259  | 1065352  | . | - | . | gene_id | "XLOC_026490"; | transcript_id | "Novel_000403"; | exon_number | "2";  | gene_type | " |
| At_chr11 | Cufflinks | exon | 1431179  | 1431654  | . | - | . | gene_id | "XLOC_026532"; | transcript_id | "Novel_000404"; | exon_number | "1";  | gene_type | " |
| At_chr11 | Cufflinks | exon | 1433585  | 1433705  | . | - | . | gene_id | "XLOC_026532"; | transcript_id | "Novel_000404"; | exon_number | "2";  | gene_type | " |
| At_chr11 | Cufflinks | exon | 1431179  | 1431654  | . | - | . | gene_id | "XLOC_026532"; | transcript_id | "Novel_000405"; | exon_number | "1";  | gene_type | " |
| At_chr11 | Cufflinks | exon | 1433585  | 1433621  | . | - | . | gene_id | "XLOC_026532"; | transcript_id | "Novel_000405"; | exon_number | "2";  | gene_type | " |
| At_chr11 | Cufflinks | exon | 1434252  | 1434316  | . | - | . | gene_id | "XLOC_026532"; | transcript_id | "Novel_000405"; | exon_number | "3";  | gene_type | " |
| At_chr11 | Cufflinks | exon | 1434485  | 1435038  | . | - | . | gene_id | "XLOC_026532"; | transcript_id | "Novel_000405"; | exon_number | "4";  | gene_type | " |
| At_chr11 | Cufflinks | exon | 1431180  | 1431654  | . | - | . | gene_id | "XLOC_026532"; | transcript_id | "Novel_000406"; | exon_number | "1";  | gene_type | " |
| At_chr11 | Cufflinks | exon | 1433585  | 1433621  | . | - | . | gene_id | "XLOC_026532"; | transcript_id | "Novel_000406"; | exon_number | "2";  | gene_type | " |
| At_chr11 | Cufflinks | exon | 1433753  | 1434270  | . | - | . | gene_id | "XLOC_026532"; | transcript_id | "Novel_000406"; | exon_number | "3";  | gene_type | " |
| At_chr11 | Cufflinks | exon | 3547816  | 3548764  | . | - | . | gene_id | "XLOC_026720"; | transcript_id | "Novel_000407"; | exon_number | "1";  | gene_type | " |
| At_chr11 | Cufflinks | exon | 5796640  | 5797103  | . | - | . | gene_id | "XLOC_026901"; | transcript_id | "Novel_000408"; | exon_number | "1";  | gene_type | " |

|          |           |      |          |          |   |   |         |                |               |                 |             |      |           |   |
|----------|-----------|------|----------|----------|---|---|---------|----------------|---------------|-----------------|-------------|------|-----------|---|
| At_chr11 | Cufflinks | exon | 5797192  | 5798476  | . | . | gene_id | "XLOC_026901"; | transcript_id | "Novel_000408"; | exon_number | "2"; | gene_type | " |
| At_chr11 | Cufflinks | exon | 5798571  | 5798703  | . | . | gene_id | "XLOC_026901"; | transcript_id | "Novel_000408"; | exon_number | "3"; | gene_type | " |
| At_chr11 | Cufflinks | exon | 7817272  | 7817458  | . | . | gene_id | "XLOC_027126"; | transcript_id | "Novel_000409"; | exon_number | "1"; | gene_type | " |
| At_chr11 | Cufflinks | exon | 7817547  | 7817629  | . | . | gene_id | "XLOC_027126"; | transcript_id | "Novel_000409"; | exon_number | "2"; | gene_type | " |
| At_chr11 | Cufflinks | exon | 7817743  | 7817831  | . | . | gene_id | "XLOC_027126"; | transcript_id | "Novel_000409"; | exon_number | "3"; | gene_type | " |
| At_chr11 | Cufflinks | exon | 7818118  | 7818157  | . | . | gene_id | "XLOC_027126"; | transcript_id | "Novel_000409"; | exon_number | "4"; | gene_type | " |
| At_chr11 | Cufflinks | exon | 7818631  | 7818892  | . | . | gene_id | "XLOC_027126"; | transcript_id | "Novel_000409"; | exon_number | "5"; | gene_type | " |
| At_chr11 | Cufflinks | exon | 8395441  | 8396026  | . | . | gene_id | "XLOC_027182"; | transcript_id | "Novel_000410"; | exon_number | "1"; | gene_type | " |
| At_chr11 | Cufflinks | exon | 8398536  | 8398624  | . | . | gene_id | "XLOC_027182"; | transcript_id | "Novel_000410"; | exon_number | "2"; | gene_type | " |
| At_chr11 | Cufflinks | exon | 8395687  | 8396026  | . | . | gene_id | "XLOC_027182"; | transcript_id | "Novel_000411"; | exon_number | "1"; | gene_type | " |
| At_chr11 | Cufflinks | exon | 8397948  | 8398152  | . | . | gene_id | "XLOC_027182"; | transcript_id | "Novel_000411"; | exon_number | "2"; | gene_type | " |
| At_chr11 | Cufflinks | exon | 11269907 | 11270763 | . | . | gene_id | "XLOC_027335"; | transcript_id | "Novel_000412"; | exon_number | "1"; | gene_type | " |
| At_chr11 | Cufflinks | exon | 11270895 | 11271331 | . | . | gene_id | "XLOC_027335"; | transcript_id | "Novel_000412"; | exon_number | "2"; | gene_type | " |
| At_chr11 | Cufflinks | exon | 11294630 | 11295059 | . | . | gene_id | "XLOC_027338"; | transcript_id | "Novel_000413"; | exon_number | "1"; | gene_type | " |
| At_chr11 | Cufflinks | exon | 11295905 | 11296036 | . | . | gene_id | "XLOC_027338"; | transcript_id | "Novel_000413"; | exon_number | "2"; | gene_type | " |
| At_chr11 | Cufflinks | exon | 11296128 | 11296468 | . | . | gene_id | "XLOC_027338"; | transcript_id | "Novel_000413"; | exon_number | "3"; | gene_type | " |
| At_chr11 | Cufflinks | exon | 11373154 | 11373386 | . | . | gene_id | "XLOC_027343"; | transcript_id | "Novel_000414"; | exon_number | "1"; | gene_type | " |
| At_chr11 | Cufflinks | exon | 11373882 | 11374779 | . | . | gene_id | "XLOC_027343"; | transcript_id | "Novel_000414"; | exon_number | "2"; | gene_type | " |
| At_chr11 | Cufflinks | exon | 11378414 | 11379285 | . | . | gene_id | "XLOC_027343"; | transcript_id | "Novel_000414"; | exon_number | "3"; | gene_type | " |
| At_chr11 | Cufflinks | exon | 11587642 | 11587706 | . | . | gene_id | "XLOC_027363"; | transcript_id | "Novel_000415"; | exon_number | "1"; | gene_type | " |
| At_chr11 | Cufflinks | exon | 11587807 | 11588072 | . | . | gene_id | "XLOC_027363"; | transcript_id | "Novel_000415"; | exon_number | "2"; | gene_type | " |
| At_chr11 | Cufflinks | exon | 12143403 | 12144539 | . | . | gene_id | "XLOC_027404"; | transcript_id | "Novel_000416"; | exon_number | "1"; | gene_type | " |
| At_chr11 | Cufflinks | exon | 12144631 | 12145074 | . | . | gene_id | "XLOC_027404"; | transcript_id | "Novel_000416"; | exon_number | "2"; | gene_type | " |
| At_chr11 | Cufflinks | exon | 12145448 | 12146416 | . | . | gene_id | "XLOC_027404"; | transcript_id | "Novel_000416"; | exon_number | "3"; | gene_type | " |
| At_chr11 | Cufflinks | exon | 12146861 | 12146926 | . | . | gene_id | "XLOC_027404"; | transcript_id | "Novel_000416"; | exon_number | "4"; | gene_type | " |
| At_chr11 | Cufflinks | exon | 12147245 | 12147995 | . | . | gene_id | "XLOC_027404"; | transcript_id | "Novel_000416"; | exon_number | "5"; | gene_type | " |
| At_chr11 | Cufflinks | exon | 12143429 | 12144539 | . | . | gene_id | "XLOC_027404"; | transcript_id | "Novel_000417"; | exon_number | "1"; | gene_type | " |
| At_chr11 | Cufflinks | exon | 12144631 | 12144722 | . | . | gene_id | "XLOC_027404"; | transcript_id | "Novel_000417"; | exon_number | "2"; | gene_type | " |
| At_chr11 | Cufflinks | exon | 12144801 | 12146416 | . | . | gene_id | "XLOC_027404"; | transcript_id | "Novel_000417"; | exon_number | "3"; | gene_type | " |
| At_chr11 | Cufflinks | exon | 12146861 | 12146926 | . | . | gene_id | "XLOC_027404"; | transcript_id | "Novel_000417"; | exon_number | "4"; | gene_type | " |
| At_chr11 | Cufflinks | exon | 12147467 | 12147976 | . | . | gene_id | "XLOC_027404"; | transcript_id | "Novel_000417"; | exon_number | "5"; | gene_type | " |
| At_chr11 | Cufflinks | exon | 12143448 | 12144539 | . | . | gene_id | "XLOC_027404"; | transcript_id | "Novel_000418"; | exon_number | "1"; | gene_type | " |
| At_chr11 | Cufflinks | exon | 12144631 | 12144722 | . | . | gene_id | "XLOC_027404"; | transcript_id | "Novel_000418"; | exon_number | "2"; | gene_type | " |
| At_chr11 | Cufflinks | exon | 12144801 | 12145074 | . | . | gene_id | "XLOC_027404"; | transcript_id | "Novel_000418"; | exon_number | "3"; | gene_type | " |
| At_chr11 | Cufflinks | exon | 12145448 | 12146416 | . | . | gene_id | "XLOC_027404"; | transcript_id | "Novel_000418"; | exon_number | "4"; | gene_type | " |



|          |           |      |          |          |   |   |   |         |                |               |                 |             |      |           |   |
|----------|-----------|------|----------|----------|---|---|---|---------|----------------|---------------|-----------------|-------------|------|-----------|---|
| At_chr11 | Cufflinks | exon | 21262131 | 21262585 | . | - | . | gene_id | "XLOC_027991"; | transcript_id | "Novel_000428"; | exon_number | "6"; | gene_type | " |
| At_chr11 | Cufflinks | exon | 21257868 | 21260833 | . | - | . | gene_id | "XLOC_027991"; | transcript_id | "Novel_000429"; | exon_number | "1"; | gene_type | " |
| At_chr11 | Cufflinks | exon | 21262131 | 21262615 | . | - | . | gene_id | "XLOC_027991"; | transcript_id | "Novel_000429"; | exon_number | "2"; | gene_type | " |
| At_chr11 | Cufflinks | exon | 21258656 | 21259140 | . | - | . | gene_id | "XLOC_027991"; | transcript_id | "Novel_000430"; | exon_number | "1"; | gene_type | " |
| At_chr11 | Cufflinks | exon | 21259380 | 21259427 | . | - | . | gene_id | "XLOC_027991"; | transcript_id | "Novel_000430"; | exon_number | "2"; | gene_type | " |
| At_chr11 | Cufflinks | exon | 21259826 | 21259978 | . | - | . | gene_id | "XLOC_027991"; | transcript_id | "Novel_000430"; | exon_number | "3"; | gene_type | " |
| At_chr11 | Cufflinks | exon | 21260159 | 21260224 | . | - | . | gene_id | "XLOC_027991"; | transcript_id | "Novel_000430"; | exon_number | "4"; | gene_type | " |
| At_chr11 | Cufflinks | exon | 21260710 | 21260833 | . | - | . | gene_id | "XLOC_027991"; | transcript_id | "Novel_000430"; | exon_number | "5"; | gene_type | " |
| At_chr11 | Cufflinks | exon | 21262131 | 21262653 | . | - | . | gene_id | "XLOC_027991"; | transcript_id | "Novel_000430"; | exon_number | "6"; | gene_type | " |
| At_chr11 | Cufflinks | exon | 21708899 | 21708927 | . | - | . | gene_id | "XLOC_028010"; | transcript_id | "Novel_000431"; | exon_number | "1"; | gene_type | " |
| At_chr11 | Cufflinks | exon | 21709808 | 21710203 | . | - | . | gene_id | "XLOC_028010"; | transcript_id | "Novel_000431"; | exon_number | "2"; | gene_type | " |
| At_chr11 | Cufflinks | exon | 22017372 | 22017731 | . | - | . | gene_id | "XLOC_028024"; | transcript_id | "Novel_000432"; | exon_number | "1"; | gene_type | " |
| At_chr11 | Cufflinks | exon | 22017852 | 22017944 | . | - | . | gene_id | "XLOC_028024"; | transcript_id | "Novel_000432"; | exon_number | "2"; | gene_type | " |
| At_chr11 | Cufflinks | exon | 22018397 | 22018480 | . | - | . | gene_id | "XLOC_028024"; | transcript_id | "Novel_000432"; | exon_number | "3"; | gene_type | " |
| At_chr11 | Cufflinks | exon | 22018632 | 22018824 | . | - | . | gene_id | "XLOC_028024"; | transcript_id | "Novel_000432"; | exon_number | "4"; | gene_type | " |
| At_chr11 | Cufflinks | exon | 22019804 | 22019990 | . | - | . | gene_id | "XLOC_028024"; | transcript_id | "Novel_000432"; | exon_number | "5"; | gene_type | " |
| At_chr11 | Cufflinks | exon | 22201770 | 22202270 | . | - | . | gene_id | "XLOC_028039"; | transcript_id | "Novel_000433"; | exon_number | "1"; | gene_type | " |
| At_chr11 | Cufflinks | exon | 27733795 | 27733953 | . | - | . | gene_id | "XLOC_028370"; | transcript_id | "Novel_000434"; | exon_number | "1"; | gene_type | " |
| At_chr11 | Cufflinks | exon | 27734692 | 27734925 | . | - | . | gene_id | "XLOC_028370"; | transcript_id | "Novel_000434"; | exon_number | "2"; | gene_type | " |
| At_chr11 | Cufflinks | exon | 35004914 | 35005018 | . | - | . | gene_id | "XLOC_028772"; | transcript_id | "Novel_000435"; | exon_number | "1"; | gene_type | " |
| At_chr11 | Cufflinks | exon | 35005425 | 35005512 | . | - | . | gene_id | "XLOC_028772"; | transcript_id | "Novel_000435"; | exon_number | "2"; | gene_type | " |
| At_chr11 | Cufflinks | exon | 35006478 | 35006517 | . | - | . | gene_id | "XLOC_028772"; | transcript_id | "Novel_000435"; | exon_number | "3"; | gene_type | " |
| At_chr11 | Cufflinks | exon | 39776314 | 39776613 | . | - | . | gene_id | "XLOC_028951"; | transcript_id | "Novel_000436"; | exon_number | "1"; | gene_type | " |
| At_chr11 | Cufflinks | exon | 40164652 | 40164813 | . | - | . | gene_id | "XLOC_028962"; | transcript_id | "Novel_000437"; | exon_number | "1"; | gene_type | " |
| At_chr11 | Cufflinks | exon | 40166395 | 40166424 | . | - | . | gene_id | "XLOC_028962"; | transcript_id | "Novel_000437"; | exon_number | "2"; | gene_type | " |
| At_chr11 | Cufflinks | exon | 40166506 | 40166577 | . | - | . | gene_id | "XLOC_028962"; | transcript_id | "Novel_000437"; | exon_number | "3"; | gene_type | " |
| At_chr11 | Cufflinks | exon | 40167026 | 40168325 | . | - | . | gene_id | "XLOC_028962"; | transcript_id | "Novel_000437"; | exon_number | "4"; | gene_type | " |
| At_chr11 | Cufflinks | exon | 46122083 | 46124268 | . | - | . | gene_id | "XLOC_029109"; | transcript_id | "Novel_000438"; | exon_number | "1"; | gene_type | " |
| At_chr11 | Cufflinks | exon | 46124557 | 46124809 | . | - | . | gene_id | "XLOC_029109"; | transcript_id | "Novel_000438"; | exon_number | "2"; | gene_type | " |
| At_chr11 | Cufflinks | exon | 54314840 | 54315928 | . | - | . | gene_id | "XLOC_029381"; | transcript_id | "Novel_000439"; | exon_number | "1"; | gene_type | " |
| At_chr11 | Cufflinks | exon | 54316028 | 54318386 | . | - | . | gene_id | "XLOC_029381"; | transcript_id | "Novel_000439"; | exon_number | "2"; | gene_type | " |
| At_chr11 | Cufflinks | exon | 54314848 | 54315928 | . | - | . | gene_id | "XLOC_029381"; | transcript_id | "Novel_000440"; | exon_number | "1"; | gene_type | " |
| At_chr11 | Cufflinks | exon | 54316028 | 54317317 | . | - | . | gene_id | "XLOC_029381"; | transcript_id | "Novel_000440"; | exon_number | "2"; | gene_type | " |
| At_chr11 | Cufflinks | exon | 54317401 | 54318386 | . | - | . | gene_id | "XLOC_029381"; | transcript_id | "Novel_000440"; | exon_number | "3"; | gene_type | " |
| At_chr11 | Cufflinks | exon | 55341817 | 55342409 | . | - | . | gene_id | "XLOC_029454"; | transcript_id | "Novel_000441"; | exon_number | "1"; | gene_type | " |

|          |           |      |          |          |   |   |   |         |                |               |                 |             |       |           |   |
|----------|-----------|------|----------|----------|---|---|---|---------|----------------|---------------|-----------------|-------------|-------|-----------|---|
| At_chr11 | Cufflinks | exon | 55342516 | 55342835 | . | - | . | gene_id | "XLOC_029454"; | transcript_id | "Novel_000441"; | exon_number | "2";  | gene_type | " |
| At_chr11 | Cufflinks | exon | 56965361 | 56968474 | . | - | . | gene_id | "XLOC_029635"; | transcript_id | "Novel_000442"; | exon_number | "1";  | gene_type | " |
| At_chr11 | Cufflinks | exon | 56968681 | 56970433 | . | - | . | gene_id | "XLOC_029635"; | transcript_id | "Novel_000442"; | exon_number | "2";  | gene_type | " |
| At_chr11 | Cufflinks | exon | 57663659 | 57666178 | . | - | . | gene_id | "XLOC_029705"; | transcript_id | "Novel_000443"; | exon_number | "1";  | gene_type | " |
| At_chr11 | Cufflinks | exon | 57666419 | 57666706 | . | - | . | gene_id | "XLOC_029705"; | transcript_id | "Novel_000443"; | exon_number | "2";  | gene_type | " |
| At_chr11 | Cufflinks | exon | 58405397 | 58406179 | . | - | . | gene_id | "XLOC_029779"; | transcript_id | "Novel_000444"; | exon_number | "1";  | gene_type | " |
| At_chr11 | Cufflinks | exon | 58406269 | 58406605 | . | - | . | gene_id | "XLOC_029779"; | transcript_id | "Novel_000444"; | exon_number | "2";  | gene_type | " |
| At_chr11 | Cufflinks | exon | 58406710 | 58406837 | . | - | . | gene_id | "XLOC_029779"; | transcript_id | "Novel_000444"; | exon_number | "3";  | gene_type | " |
| At_chr11 | Cufflinks | exon | 58407107 | 58407550 | . | - | . | gene_id | "XLOC_029779"; | transcript_id | "Novel_000444"; | exon_number | "4";  | gene_type | " |
| At_chr11 | Cufflinks | exon | 58407623 | 58407713 | . | - | . | gene_id | "XLOC_029779"; | transcript_id | "Novel_000444"; | exon_number | "5";  | gene_type | " |
| At_chr11 | Cufflinks | exon | 58407797 | 58407906 | . | - | . | gene_id | "XLOC_029779"; | transcript_id | "Novel_000444"; | exon_number | "6";  | gene_type | " |
| At_chr11 | Cufflinks | exon | 58408177 | 58408286 | . | - | . | gene_id | "XLOC_029779"; | transcript_id | "Novel_000444"; | exon_number | "7";  | gene_type | " |
| At_chr11 | Cufflinks | exon | 58408405 | 58408507 | . | - | . | gene_id | "XLOC_029779"; | transcript_id | "Novel_000444"; | exon_number | "8";  | gene_type | " |
| At_chr11 | Cufflinks | exon | 58408902 | 58408946 | . | - | . | gene_id | "XLOC_029779"; | transcript_id | "Novel_000444"; | exon_number | "9";  | gene_type | " |
| At_chr11 | Cufflinks | exon | 58409062 | 58409186 | . | - | . | gene_id | "XLOC_029779"; | transcript_id | "Novel_000444"; | exon_number | "10"; | gene_type | " |
| At_chr11 | Cufflinks | exon | 58409296 | 58409366 | . | - | . | gene_id | "XLOC_029779"; | transcript_id | "Novel_000444"; | exon_number | "11"; | gene_type | " |
| At_chr11 | Cufflinks | exon | 58409468 | 58409632 | . | - | . | gene_id | "XLOC_029779"; | transcript_id | "Novel_000444"; | exon_number | "12"; | gene_type | " |
| At_chr11 | Cufflinks | exon | 60787165 | 60787465 | . | - | . | gene_id | "XLOC_029957"; | transcript_id | "Novel_000445"; | exon_number | "1";  | gene_type | " |
| At_chr11 | Cufflinks | exon | 60964844 | 60964966 | . | - | . | gene_id | "XLOC_029965"; | transcript_id | "Novel_000446"; | exon_number | "1";  | gene_type | " |
| At_chr11 | Cufflinks | exon | 60965089 | 60965181 | . | - | . | gene_id | "XLOC_029965"; | transcript_id | "Novel_000446"; | exon_number | "2";  | gene_type | " |
| At_chr11 | Cufflinks | exon | 60965754 | 60966081 | . | - | . | gene_id | "XLOC_029965"; | transcript_id | "Novel_000446"; | exon_number | "3";  | gene_type | " |
| At_chr11 | Cufflinks | exon | 60966900 | 60967198 | . | - | . | gene_id | "XLOC_029965"; | transcript_id | "Novel_000446"; | exon_number | "4";  | gene_type | " |
| At_chr11 | Cufflinks | exon | 60968197 | 60968349 | . | - | . | gene_id | "XLOC_029965"; | transcript_id | "Novel_000446"; | exon_number | "5";  | gene_type | " |
| At_chr11 | Cufflinks | exon | 60968953 | 60969084 | . | - | . | gene_id | "XLOC_029965"; | transcript_id | "Novel_000446"; | exon_number | "6";  | gene_type | " |
| At_chr11 | Cufflinks | exon | 60964883 | 60964966 | . | - | . | gene_id | "XLOC_029965"; | transcript_id | "Novel_000447"; | exon_number | "1";  | gene_type | " |
| At_chr11 | Cufflinks | exon | 60965089 | 60965181 | . | - | . | gene_id | "XLOC_029965"; | transcript_id | "Novel_000447"; | exon_number | "2";  | gene_type | " |
| At_chr11 | Cufflinks | exon | 60965754 | 60966081 | . | - | . | gene_id | "XLOC_029965"; | transcript_id | "Novel_000447"; | exon_number | "3";  | gene_type | " |
| At_chr11 | Cufflinks | exon | 60967082 | 60967198 | . | - | . | gene_id | "XLOC_029965"; | transcript_id | "Novel_000447"; | exon_number | "4";  | gene_type | " |
| At_chr11 | Cufflinks | exon | 60968197 | 60968349 | . | - | . | gene_id | "XLOC_029965"; | transcript_id | "Novel_000447"; | exon_number | "5";  | gene_type | " |
| At_chr11 | Cufflinks | exon | 60968953 | 60969147 | . | - | . | gene_id | "XLOC_029965"; | transcript_id | "Novel_000447"; | exon_number | "6";  | gene_type | " |
| At_chr11 | Cufflinks | exon | 62865863 | 62866140 | . | - | . | gene_id | "XLOC_030207"; | transcript_id | "Novel_000448"; | exon_number | "1";  | gene_type | " |
| At_chr11 | Cufflinks | exon | 62913447 | 62913813 | . | - | . | gene_id | "XLOC_030218"; | transcript_id | "Novel_000449"; | exon_number | "1";  | gene_type | " |
| At_chr11 | Cufflinks | exon | 62914612 | 62915342 | . | - | . | gene_id | "XLOC_030218"; | transcript_id | "Novel_000449"; | exon_number | "2";  | gene_type | " |
| At_chr11 | Cufflinks | exon | 67254690 | 67256489 | . | - | . | gene_id | "XLOC_030514"; | transcript_id | "Novel_000450"; | exon_number | "1";  | gene_type | " |
| At_chr11 | Cufflinks | exon | 67256706 | 67256843 | . | - | . | gene_id | "XLOC_030514"; | transcript_id | "Novel_000450"; | exon_number | "2";  | gene_type | " |



|          |           |      |          |          |   |   |         |                |               |                 |             |      |           |   |
|----------|-----------|------|----------|----------|---|---|---------|----------------|---------------|-----------------|-------------|------|-----------|---|
| At_chr11 | Cufflinks | exon | 67256937 | 67257092 | . | . | gene_id | "XLOC_030514"; | transcript_id | "Novel_000450"; | exon_number | "3"; | gene_type | " |
| At_chr11 | Cufflinks | exon | 67254690 | 67256489 | . | . | gene_id | "XLOC_030514"; | transcript_id | "Novel_000451"; | exon_number | "1"; | gene_type | " |
| At_chr11 | Cufflinks | exon | 67256937 | 67257092 | . | . | gene_id | "XLOC_030514"; | transcript_id | "Novel_000451"; | exon_number | "2"; | gene_type | " |
| At_chr11 | Cufflinks | exon | 67254690 | 67256489 | . | . | gene_id | "XLOC_030514"; | transcript_id | "Novel_000452"; | exon_number | "1"; | gene_type | " |
| At_chr11 | Cufflinks | exon | 67256706 | 67257092 | . | . | gene_id | "XLOC_030514"; | transcript_id | "Novel_000452"; | exon_number | "2"; | gene_type | " |
| At_chr11 | Cufflinks | exon | 67797232 | 67797390 | . | . | gene_id | "XLOC_030563"; | transcript_id | "Novel_000453"; | exon_number | "1"; | gene_type | " |
| At_chr11 | Cufflinks | exon | 67797779 | 67797845 | . | . | gene_id | "XLOC_030563"; | transcript_id | "Novel_000453"; | exon_number | "2"; | gene_type | " |
| At_chr11 | Cufflinks | exon | 67797938 | 67798047 | . | . | gene_id | "XLOC_030563"; | transcript_id | "Novel_000453"; | exon_number | "3"; | gene_type | " |
| At_chr11 | Cufflinks | exon | 67798522 | 67798622 | . | . | gene_id | "XLOC_030563"; | transcript_id | "Novel_000453"; | exon_number | "4"; | gene_type | " |
| At_chr11 | Cufflinks | exon | 67798869 | 67798955 | . | . | gene_id | "XLOC_030563"; | transcript_id | "Novel_000453"; | exon_number | "5"; | gene_type | " |
| At_chr11 | Cufflinks | exon | 68552445 | 68554166 | . | . | gene_id | "XLOC_030612"; | transcript_id | "Novel_000454"; | exon_number | "1"; | gene_type | " |
| At_chr11 | Cufflinks | exon | 68555076 | 68555924 | . | . | gene_id | "XLOC_030612"; | transcript_id | "Novel_000454"; | exon_number | "2"; | gene_type | " |
| At_chr11 | Cufflinks | exon | 69676621 | 69676841 | . | . | gene_id | "XLOC_030680"; | transcript_id | "Novel_000455"; | exon_number | "1"; | gene_type | " |
| At_chr11 | Cufflinks | exon | 76678986 | 76679210 | . | . | gene_id | "XLOC_030907"; | transcript_id | "Novel_000456"; | exon_number | "1"; | gene_type | " |
| At_chr11 | Cufflinks | exon | 81227524 | 81229382 | . | . | gene_id | "XLOC_031017"; | transcript_id | "Novel_000457"; | exon_number | "1"; | gene_type | " |
| At_chr11 | Cufflinks | exon | 84182834 | 84184422 | . | . | gene_id | "XLOC_031102"; | transcript_id | "Novel_000458"; | exon_number | "1"; | gene_type | " |
| At_chr11 | Cufflinks | exon | 84185571 | 84185637 | . | . | gene_id | "XLOC_031102"; | transcript_id | "Novel_000458"; | exon_number | "2"; | gene_type | " |
| At_chr11 | Cufflinks | exon | 84186569 | 84186646 | . | . | gene_id | "XLOC_031102"; | transcript_id | "Novel_000458"; | exon_number | "3"; | gene_type | " |
| At_chr11 | Cufflinks | exon | 84186957 | 84187202 | . | . | gene_id | "XLOC_031102"; | transcript_id | "Novel_000458"; | exon_number | "4"; | gene_type | " |
| At_chr11 | Cufflinks | exon | 85120794 | 85123804 | . | . | gene_id | "XLOC_031145"; | transcript_id | "Novel_000459"; | exon_number | "1"; | gene_type | " |
| At_chr11 | Cufflinks | exon | 85124351 | 85124644 | . | . | gene_id | "XLOC_031145"; | transcript_id | "Novel_000459"; | exon_number | "2"; | gene_type | " |
| At_chr11 | Cufflinks | exon | 89503551 | 89505292 | . | . | gene_id | "XLOC_031264"; | transcript_id | "Novel_000460"; | exon_number | "1"; | gene_type | " |
| At_chr11 | Cufflinks | exon | 89505400 | 89505635 | . | . | gene_id | "XLOC_031264"; | transcript_id | "Novel_000460"; | exon_number | "2"; | gene_type | " |
| At_chr11 | Cufflinks | exon | 89503588 | 89504220 | . | . | gene_id | "XLOC_031264"; | transcript_id | "Novel_000461"; | exon_number | "1"; | gene_type | " |
| At_chr11 | Cufflinks | exon | 89504681 | 89504707 | . | . | gene_id | "XLOC_031264"; | transcript_id | "Novel_000461"; | exon_number | "2"; | gene_type | " |
| At_chr11 | Cufflinks | exon | 89505218 | 89505292 | . | . | gene_id | "XLOC_031264"; | transcript_id | "Novel_000461"; | exon_number | "3"; | gene_type | " |
| At_chr11 | Cufflinks | exon | 89505400 | 89505656 | . | . | gene_id | "XLOC_031264"; | transcript_id | "Novel_000461"; | exon_number | "4"; | gene_type | " |
| At_chr11 | Cufflinks | exon | 89503685 | 89504027 | . | . | gene_id | "XLOC_031264"; | transcript_id | "Novel_000462"; | exon_number | "1"; | gene_type | " |
| At_chr11 | Cufflinks | exon | 89504106 | 89504220 | . | . | gene_id | "XLOC_031264"; | transcript_id | "Novel_000462"; | exon_number | "2"; | gene_type | " |
| At_chr11 | Cufflinks | exon | 89504681 | 89504707 | . | . | gene_id | "XLOC_031264"; | transcript_id | "Novel_000462"; | exon_number | "3"; | gene_type | " |
| At_chr11 | Cufflinks | exon | 89505218 | 89505292 | . | . | gene_id | "XLOC_031264"; | transcript_id | "Novel_000462"; | exon_number | "4"; | gene_type | " |
| At_chr11 | Cufflinks | exon | 89505400 | 89505641 | . | . | gene_id | "XLOC_031264"; | transcript_id | "Novel_000462"; | exon_number | "5"; | gene_type | " |
| At_chr11 | Cufflinks | exon | 90005662 | 90005904 | . | . | gene_id | "XLOC_031282"; | transcript_id | "Novel_000463"; | exon_number | "1"; | gene_type | " |
| At_chr11 | Cufflinks | exon | 90006408 | 90006858 | . | . | gene_id | "XLOC_031282"; | transcript_id | "Novel_000463"; | exon_number | "2"; | gene_type | " |
| At_chr11 | Cufflinks | exon | 90007846 | 90008020 | . | . | gene_id | "XLOC_031282"; | transcript_id | "Novel_000463"; | exon_number | "3"; | gene_type | " |

|          |           |      |          |          |   |   |         |                |               |                 |             |      |           |   |
|----------|-----------|------|----------|----------|---|---|---------|----------------|---------------|-----------------|-------------|------|-----------|---|
| At_chr11 | Cufflinks | exon | 90005662 | 90006858 | . | . | gene_id | "XLOC_031282"; | transcript_id | "Novel_000464"; | exon_number | "1"; | gene_type | " |
| At_chr11 | Cufflinks | exon | 90007846 | 90008020 | . | . | gene_id | "XLOC_031282"; | transcript_id | "Novel_000464"; | exon_number | "2"; | gene_type | " |
| At_chr11 | Cufflinks | exon | 90005723 | 90005904 | . | . | gene_id | "XLOC_031282"; | transcript_id | "Novel_000465"; | exon_number | "1"; | gene_type | " |
| At_chr11 | Cufflinks | exon | 90006408 | 90007558 | . | . | gene_id | "XLOC_031282"; | transcript_id | "Novel_000465"; | exon_number | "2"; | gene_type | " |
| At_chr11 | Cufflinks | exon | 93918064 | 93918337 | . | . | gene_id | "XLOC_031476"; | transcript_id | "Novel_000466"; | exon_number | "1"; | gene_type | " |
| At_chr11 | Cufflinks | exon | 95663685 | 95664361 | . | . | gene_id | "XLOC_031558"; | transcript_id | "Novel_000467"; | exon_number | "1"; | gene_type | " |
| At_chr11 | Cufflinks | exon | 95664826 | 95664891 | . | . | gene_id | "XLOC_031558"; | transcript_id | "Novel_000467"; | exon_number | "2"; | gene_type | " |
| At_chr11 | Cufflinks | exon | 95665008 | 95665077 | . | . | gene_id | "XLOC_031558"; | transcript_id | "Novel_000467"; | exon_number | "3"; | gene_type | " |
| At_chr11 | Cufflinks | exon | 95665172 | 95666041 | . | . | gene_id | "XLOC_031558"; | transcript_id | "Novel_000467"; | exon_number | "4"; | gene_type | " |
| At_chr11 | Cufflinks | exon | 95663785 | 95664361 | . | . | gene_id | "XLOC_031558"; | transcript_id | "Novel_000468"; | exon_number | "1"; | gene_type | " |
| At_chr11 | Cufflinks | exon | 95665008 | 95665077 | . | . | gene_id | "XLOC_031558"; | transcript_id | "Novel_000468"; | exon_number | "2"; | gene_type | " |
| At_chr11 | Cufflinks | exon | 95665172 | 95666084 | . | . | gene_id | "XLOC_031558"; | transcript_id | "Novel_000468"; | exon_number | "3"; | gene_type | " |
| At_chr11 | Cufflinks | exon | 96761873 | 96762453 | . | . | gene_id | "XLOC_031599"; | transcript_id | "Novel_000469"; | exon_number | "1"; | gene_type | " |
| At_chr11 | Cufflinks | exon | 96763402 | 96763488 | . | . | gene_id | "XLOC_031599"; | transcript_id | "Novel_000469"; | exon_number | "2"; | gene_type | " |
| At_chr11 | Cufflinks | exon | 96763599 | 96764154 | . | . | gene_id | "XLOC_031599"; | transcript_id | "Novel_000469"; | exon_number | "3"; | gene_type | " |
| At_chr11 | Cufflinks | exon | 96761873 | 96762453 | . | . | gene_id | "XLOC_031599"; | transcript_id | "Novel_000470"; | exon_number | "1"; | gene_type | " |
| At_chr11 | Cufflinks | exon | 96763402 | 96763488 | . | . | gene_id | "XLOC_031599"; | transcript_id | "Novel_000470"; | exon_number | "2"; | gene_type | " |
| At_chr11 | Cufflinks | exon | 96763599 | 96763704 | . | . | gene_id | "XLOC_031599"; | transcript_id | "Novel_000470"; | exon_number | "3"; | gene_type | " |
| At_chr11 | Cufflinks | exon | 96763785 | 96763973 | . | . | gene_id | "XLOC_031599"; | transcript_id | "Novel_000470"; | exon_number | "4"; | gene_type | " |
| At_chr11 | Cufflinks | exon | 96764217 | 96764443 | . | . | gene_id | "XLOC_031599"; | transcript_id | "Novel_000470"; | exon_number | "5"; | gene_type | " |
| At_chr11 | Cufflinks | exon | 96762141 | 96762453 | . | . | gene_id | "XLOC_031599"; | transcript_id | "Novel_000471"; | exon_number | "1"; | gene_type | " |
| At_chr11 | Cufflinks | exon | 96763402 | 96763488 | . | . | gene_id | "XLOC_031599"; | transcript_id | "Novel_000471"; | exon_number | "2"; | gene_type | " |
| At_chr11 | Cufflinks | exon | 96763599 | 96763704 | . | . | gene_id | "XLOC_031599"; | transcript_id | "Novel_000471"; | exon_number | "3"; | gene_type | " |
| At_chr11 | Cufflinks | exon | 96763785 | 96764459 | . | . | gene_id | "XLOC_031599"; | transcript_id | "Novel_000471"; | exon_number | "4"; | gene_type | " |
| At_chr11 | Cufflinks | exon | 98433974 | 98436208 | . | . | gene_id | "XLOC_031661"; | transcript_id | "Novel_000472"; | exon_number | "1"; | gene_type | " |
| At_chr11 | Cufflinks | exon | 98442109 | 98442385 | . | . | gene_id | "XLOC_031661"; | transcript_id | "Novel_000472"; | exon_number | "2"; | gene_type | " |
| At_chr11 | Cufflinks | exon | 98442490 | 98442937 | . | . | gene_id | "XLOC_031661"; | transcript_id | "Novel_000472"; | exon_number | "3"; | gene_type | " |
| At_chr11 | Cufflinks | exon | 99207630 | 99208428 | . | . | gene_id | "XLOC_031707"; | transcript_id | "Novel_000473"; | exon_number | "1"; | gene_type | " |
| At_chr11 | Cufflinks | exon | 99208804 | 99209004 | . | . | gene_id | "XLOC_031707"; | transcript_id | "Novel_000473"; | exon_number | "2"; | gene_type | " |
| At_chr11 | Cufflinks | exon | 99209164 | 99209184 | . | . | gene_id | "XLOC_031708"; | transcript_id | "Novel_000474"; | exon_number | "1"; | gene_type | " |
| At_chr11 | Cufflinks | exon | 99209864 | 99210059 | . | . | gene_id | "XLOC_031708"; | transcript_id | "Novel_000474"; | exon_number | "2"; | gene_type | " |
| At_chr11 | Cufflinks | exon | 99210230 | 99210362 | . | . | gene_id | "XLOC_031708"; | transcript_id | "Novel_000474"; | exon_number | "3"; | gene_type | " |
| At_chr11 | Cufflinks | exon | 99210517 | 99210979 | . | . | gene_id | "XLOC_031708"; | transcript_id | "Novel_000474"; | exon_number | "4"; | gene_type | " |
| At_chr11 | Cufflinks | exon | 99209166 | 99209184 | . | . | gene_id | "XLOC_031708"; | transcript_id | "Novel_000475"; | exon_number | "1"; | gene_type | " |
| At_chr11 | Cufflinks | exon | 99209864 | 99210059 | . | . | gene_id | "XLOC_031708"; | transcript_id | "Novel_000475"; | exon_number | "2"; | gene_type | " |

|          |           |      |          |          |   |   |   |         |                |               |                 |             |      |           |   |
|----------|-----------|------|----------|----------|---|---|---|---------|----------------|---------------|-----------------|-------------|------|-----------|---|
| At_chr11 | Cufflinks | exon | 99210230 | 99210382 | . | - | . | gene_id | "XLOC_031708"; | transcript_id | "Novel_000475"; | exon_number | "3"; | gene_type | " |
| At_chr11 | Cufflinks | exon | 99212084 | 99212396 | . | - | . | gene_id | "XLOC_031708"; | transcript_id | "Novel_000476"; | exon_number | "1"; | gene_type | " |
| At_chr11 | Cufflinks | exon | 99212684 | 99212728 | . | - | . | gene_id | "XLOC_031708"; | transcript_id | "Novel_000476"; | exon_number | "2"; | gene_type | " |
| At_chr11 | Cufflinks | exon | 99213066 | 99213180 | . | - | . | gene_id | "XLOC_031708"; | transcript_id | "Novel_000476"; | exon_number | "3"; | gene_type | " |
| At_chr11 | Cufflinks | exon | 99213276 | 99213382 | . | - | . | gene_id | "XLOC_031708"; | transcript_id | "Novel_000476"; | exon_number | "4"; | gene_type | " |
| At_chr11 | Cufflinks | exon | 99213817 | 99213911 | . | - | . | gene_id | "XLOC_031708"; | transcript_id | "Novel_000476"; | exon_number | "5"; | gene_type | " |
| At_chr11 | Cufflinks | exon | 99214056 | 99214170 | . | - | . | gene_id | "XLOC_031708"; | transcript_id | "Novel_000476"; | exon_number | "6"; | gene_type | " |
| At_chr11 | Cufflinks | exon | 99214574 | 99214625 | . | - | . | gene_id | "XLOC_031708"; | transcript_id | "Novel_000476"; | exon_number | "7"; | gene_type | " |
| At_chr11 | Cufflinks | exon | 99214832 | 99214893 | . | - | . | gene_id | "XLOC_031708"; | transcript_id | "Novel_000476"; | exon_number | "8"; | gene_type | " |
| At_chr11 | Cufflinks | exon | 99214976 | 99215262 | . | - | . | gene_id | "XLOC_031708"; | transcript_id | "Novel_000476"; | exon_number | "9"; | gene_type | " |
| At_chr11 | Cufflinks | exon | 99213019 | 99213382 | . | - | . | gene_id | "XLOC_031708"; | transcript_id | "Novel_000477"; | exon_number | "1"; | gene_type | " |
| At_chr11 | Cufflinks | exon | 99213817 | 99213911 | . | - | . | gene_id | "XLOC_031708"; | transcript_id | "Novel_000477"; | exon_number | "2"; | gene_type | " |
| At_chr11 | Cufflinks | exon | 99214056 | 99214170 | . | - | . | gene_id | "XLOC_031708"; | transcript_id | "Novel_000477"; | exon_number | "3"; | gene_type | " |
| At_chr11 | Cufflinks | exon | 99214574 | 99214625 | . | - | . | gene_id | "XLOC_031708"; | transcript_id | "Novel_000477"; | exon_number | "4"; | gene_type | " |
| At_chr11 | Cufflinks | exon | 99214832 | 99214893 | . | - | . | gene_id | "XLOC_031708"; | transcript_id | "Novel_000477"; | exon_number | "5"; | gene_type | " |
| At_chr11 | Cufflinks | exon | 99214976 | 99215164 | . | - | . | gene_id | "XLOC_031708"; | transcript_id | "Novel_000477"; | exon_number | "6"; | gene_type | " |
| At_chr12 | Cufflinks | exon | 4200943  | 4201335  | . | + | . | gene_id | "XLOC_032068"; | transcript_id | "Novel_000478"; | exon_number | "1"; | gene_type | " |
| At_chr12 | Cufflinks | exon | 4201638  | 4202279  | . | + | . | gene_id | "XLOC_032068"; | transcript_id | "Novel_000478"; | exon_number | "2"; | gene_type | " |
| At_chr12 | Cufflinks | exon | 4202474  | 4202978  | . | + | . | gene_id | "XLOC_032068"; | transcript_id | "Novel_000478"; | exon_number | "3"; | gene_type | " |
| At_chr12 | Cufflinks | exon | 4200943  | 4202279  | . | + | . | gene_id | "XLOC_032068"; | transcript_id | "Novel_000479"; | exon_number | "1"; | gene_type | " |
| At_chr12 | Cufflinks | exon | 4202474  | 4202978  | . | + | . | gene_id | "XLOC_032068"; | transcript_id | "Novel_000479"; | exon_number | "2"; | gene_type | " |
| At_chr12 | Cufflinks | exon | 5138425  | 5138519  | . | + | . | gene_id | "XLOC_032091"; | transcript_id | "Novel_000480"; | exon_number | "1"; | gene_type | " |
| At_chr12 | Cufflinks | exon | 5138618  | 5138793  | . | + | . | gene_id | "XLOC_032091"; | transcript_id | "Novel_000480"; | exon_number | "2"; | gene_type | " |
| At_chr12 | Cufflinks | exon | 9514925  | 9515694  | . | + | . | gene_id | "XLOC_032238"; | transcript_id | "Novel_000481"; | exon_number | "1"; | gene_type | " |
| At_chr12 | Cufflinks | exon | 9516147  | 9516383  | . | + | . | gene_id | "XLOC_032238"; | transcript_id | "Novel_000481"; | exon_number | "2"; | gene_type | " |
| At_chr12 | Cufflinks | exon | 9516597  | 9518272  | . | + | . | gene_id | "XLOC_032238"; | transcript_id | "Novel_000481"; | exon_number | "3"; | gene_type | " |
| At_chr12 | Cufflinks | exon | 9601400  | 9601729  | . | + | . | gene_id | "XLOC_032253"; | transcript_id | "Novel_000482"; | exon_number | "1"; | gene_type | " |
| At_chr12 | Cufflinks | exon | 15575440 | 15575616 | . | + | . | gene_id | "XLOC_032428"; | transcript_id | "Novel_000483"; | exon_number | "1"; | gene_type | " |
| At_chr12 | Cufflinks | exon | 15576091 | 15576176 | . | + | . | gene_id | "XLOC_032428"; | transcript_id | "Novel_000483"; | exon_number | "2"; | gene_type | " |
| At_chr12 | Cufflinks | exon | 15576874 | 15579563 | . | + | . | gene_id | "XLOC_032428"; | transcript_id | "Novel_000483"; | exon_number | "3"; | gene_type | " |
| At_chr12 | Cufflinks | exon | 36236556 | 36236785 | . | + | . | gene_id | "XLOC_033107"; | transcript_id | "Novel_000484"; | exon_number | "1"; | gene_type | " |
| At_chr12 | Cufflinks | exon | 37032229 | 37032933 | . | + | . | gene_id | "XLOC_033129"; | transcript_id | "Novel_000485"; | exon_number | "1"; | gene_type | " |
| At_chr12 | Cufflinks | exon | 37033396 | 37033522 | . | + | . | gene_id | "XLOC_033129"; | transcript_id | "Novel_000485"; | exon_number | "2"; | gene_type | " |
| At_chr12 | Cufflinks | exon | 37033907 | 37034105 | . | + | . | gene_id | "XLOC_033129"; | transcript_id | "Novel_000485"; | exon_number | "3"; | gene_type | " |
| At_chr12 | Cufflinks | exon | 37035217 | 37035327 | . | + | . | gene_id | "XLOC_033129"; | transcript_id | "Novel_000485"; | exon_number | "4"; | gene_type | " |

|          |           |      |          |          |   |   |   |         |                |               |                 |             |      |           |   |
|----------|-----------|------|----------|----------|---|---|---|---------|----------------|---------------|-----------------|-------------|------|-----------|---|
| At_chr12 | Cufflinks | exon | 37036994 | 37037027 | . | + | . | gene_id | "XLOC_033129"; | transcript_id | "Novel_000485"; | exon_number | "5"; | gene_type | " |
| At_chr12 | Cufflinks | exon | 37037752 | 37038011 | . | + | . | gene_id | "XLOC_033129"; | transcript_id | "Novel_000485"; | exon_number | "6"; | gene_type | " |
| At_chr12 | Cufflinks | exon | 37032261 | 37032933 | . | + | . | gene_id | "XLOC_033129"; | transcript_id | "Novel_000486"; | exon_number | "1"; | gene_type | " |
| At_chr12 | Cufflinks | exon | 37033396 | 37033522 | . | + | . | gene_id | "XLOC_033129"; | transcript_id | "Novel_000486"; | exon_number | "2"; | gene_type | " |
| At_chr12 | Cufflinks | exon | 37033907 | 37035429 | . | + | . | gene_id | "XLOC_033129"; | transcript_id | "Novel_000486"; | exon_number | "3"; | gene_type | " |
| At_chr12 | Cufflinks | exon | 37032276 | 37032648 | . | + | . | gene_id | "XLOC_033129"; | transcript_id | "Novel_000487"; | exon_number | "1"; | gene_type | " |
| At_chr12 | Cufflinks | exon | 37032733 | 37032933 | . | + | . | gene_id | "XLOC_033129"; | transcript_id | "Novel_000487"; | exon_number | "2"; | gene_type | " |
| At_chr12 | Cufflinks | exon | 37033396 | 37033522 | . | + | . | gene_id | "XLOC_033129"; | transcript_id | "Novel_000487"; | exon_number | "3"; | gene_type | " |
| At_chr12 | Cufflinks | exon | 37033907 | 37034105 | . | + | . | gene_id | "XLOC_033129"; | transcript_id | "Novel_000487"; | exon_number | "4"; | gene_type | " |
| At_chr12 | Cufflinks | exon | 37035217 | 37035327 | . | + | . | gene_id | "XLOC_033129"; | transcript_id | "Novel_000487"; | exon_number | "5"; | gene_type | " |
| At_chr12 | Cufflinks | exon | 37036994 | 37037027 | . | + | . | gene_id | "XLOC_033129"; | transcript_id | "Novel_000487"; | exon_number | "6"; | gene_type | " |
| At_chr12 | Cufflinks | exon | 37037752 | 37038012 | . | + | . | gene_id | "XLOC_033129"; | transcript_id | "Novel_000487"; | exon_number | "7"; | gene_type | " |
| At_chr12 | Cufflinks | exon | 41073528 | 41073791 | . | + | . | gene_id | "XLOC_033225"; | transcript_id | "Novel_000488"; | exon_number | "1"; | gene_type | " |
| At_chr12 | Cufflinks | exon | 43873422 | 43874434 | . | + | . | gene_id | "XLOC_033450"; | transcript_id | "Novel_000489"; | exon_number | "1"; | gene_type | " |
| At_chr12 | Cufflinks | exon | 43874751 | 43878186 | . | + | . | gene_id | "XLOC_033450"; | transcript_id | "Novel_000489"; | exon_number | "2"; | gene_type | " |
| At_chr12 | Cufflinks | exon | 45395913 | 45396142 | . | + | . | gene_id | "XLOC_033613"; | transcript_id | "Novel_000490"; | exon_number | "1"; | gene_type | " |
| At_chr12 | Cufflinks | exon | 45396262 | 45396578 | . | + | . | gene_id | "XLOC_033613"; | transcript_id | "Novel_000490"; | exon_number | "2"; | gene_type | " |
| At_chr12 | Cufflinks | exon | 45395913 | 45396142 | . | + | . | gene_id | "XLOC_033613"; | transcript_id | "Novel_000491"; | exon_number | "1"; | gene_type | " |
| At_chr12 | Cufflinks | exon | 45396262 | 45396339 | . | + | . | gene_id | "XLOC_033613"; | transcript_id | "Novel_000491"; | exon_number | "2"; | gene_type | " |
| At_chr12 | Cufflinks | exon | 45397268 | 45397359 | . | + | . | gene_id | "XLOC_033613"; | transcript_id | "Novel_000491"; | exon_number | "3"; | gene_type | " |
| At_chr12 | Cufflinks | exon | 45397438 | 45397471 | . | + | . | gene_id | "XLOC_033613"; | transcript_id | "Novel_000491"; | exon_number | "4"; | gene_type | " |
| At_chr12 | Cufflinks | exon | 45397569 | 45397918 | . | + | . | gene_id | "XLOC_033613"; | transcript_id | "Novel_000491"; | exon_number | "5"; | gene_type | " |
| At_chr12 | Cufflinks | exon | 45395914 | 45396142 | . | + | . | gene_id | "XLOC_033613"; | transcript_id | "Novel_000492"; | exon_number | "1"; | gene_type | " |
| At_chr12 | Cufflinks | exon | 45396262 | 45396339 | . | + | . | gene_id | "XLOC_033613"; | transcript_id | "Novel_000492"; | exon_number | "2"; | gene_type | " |
| At_chr12 | Cufflinks | exon | 45397268 | 45397904 | . | + | . | gene_id | "XLOC_033613"; | transcript_id | "Novel_000492"; | exon_number | "3"; | gene_type | " |
| At_chr12 | Cufflinks | exon | 46635861 | 46637300 | . | + | . | gene_id | "XLOC_033670"; | transcript_id | "Novel_000493"; | exon_number | "1"; | gene_type | " |
| At_chr12 | Cufflinks | exon | 46637471 | 46638055 | . | + | . | gene_id | "XLOC_033670"; | transcript_id | "Novel_000493"; | exon_number | "2"; | gene_type | " |
| At_chr12 | Cufflinks | exon | 50636868 | 50637178 | . | + | . | gene_id | "XLOC_033844"; | transcript_id | "Novel_000494"; | exon_number | "1"; | gene_type | " |
| At_chr12 | Cufflinks | exon | 50638173 | 50638273 | . | + | . | gene_id | "XLOC_033844"; | transcript_id | "Novel_000494"; | exon_number | "2"; | gene_type | " |
| At_chr12 | Cufflinks | exon | 50638382 | 50638654 | . | + | . | gene_id | "XLOC_033844"; | transcript_id | "Novel_000494"; | exon_number | "3"; | gene_type | " |
| At_chr12 | Cufflinks | exon | 51631166 | 51631280 | . | + | . | gene_id | "XLOC_034026"; | transcript_id | "Novel_000495"; | exon_number | "1"; | gene_type | " |
| At_chr12 | Cufflinks | exon | 51631466 | 51631531 | . | + | . | gene_id | "XLOC_034026"; | transcript_id | "Novel_000495"; | exon_number | "2"; | gene_type | " |
| At_chr12 | Cufflinks | exon | 51633269 | 51633611 | . | + | . | gene_id | "XLOC_034026"; | transcript_id | "Novel_000495"; | exon_number | "3"; | gene_type | " |
| At_chr12 | Cufflinks | exon | 51680083 | 51680121 | . | + | . | gene_id | "XLOC_034034"; | transcript_id | "Novel_000496"; | exon_number | "1"; | gene_type | " |
| At_chr12 | Cufflinks | exon | 51680527 | 51680580 | . | + | . | gene_id | "XLOC_034034"; | transcript_id | "Novel_000496"; | exon_number | "2"; | gene_type | " |

|          |           |      |          |          |   |   |   |         |                |               |                 |             |      |           |   |
|----------|-----------|------|----------|----------|---|---|---|---------|----------------|---------------|-----------------|-------------|------|-----------|---|
| At_chr12 | Cufflinks | exon | 51680759 | 51680836 | . | + | . | gene_id | "XLOC_034034"; | transcript_id | "Novel_000496"; | exon_number | "3"; | gene_type | " |
| At_chr12 | Cufflinks | exon | 51680956 | 51680980 | . | + | . | gene_id | "XLOC_034034"; | transcript_id | "Novel_000496"; | exon_number | "4"; | gene_type | " |
| At_chr12 | Cufflinks | exon | 51681075 | 51681107 | . | + | . | gene_id | "XLOC_034034"; | transcript_id | "Novel_000496"; | exon_number | "5"; | gene_type | " |
| At_chr12 | Cufflinks | exon | 51681508 | 51681629 | . | + | . | gene_id | "XLOC_034034"; | transcript_id | "Novel_000496"; | exon_number | "6"; | gene_type | " |
| At_chr12 | Cufflinks | exon | 51681762 | 51682677 | . | + | . | gene_id | "XLOC_034034"; | transcript_id | "Novel_000496"; | exon_number | "7"; | gene_type | " |
| At_chr12 | Cufflinks | exon | 51682767 | 51683341 | . | + | . | gene_id | "XLOC_034034"; | transcript_id | "Novel_000496"; | exon_number | "8"; | gene_type | " |
| At_chr12 | Cufflinks | exon | 53964161 | 53964587 | . | + | . | gene_id | "XLOC_034310"; | transcript_id | "Novel_000497"; | exon_number | "1"; | gene_type | " |
| At_chr12 | Cufflinks | exon | 53964669 | 53964740 | . | + | . | gene_id | "XLOC_034310"; | transcript_id | "Novel_000497"; | exon_number | "2"; | gene_type | " |
| At_chr12 | Cufflinks | exon | 53964810 | 53964883 | . | + | . | gene_id | "XLOC_034310"; | transcript_id | "Novel_000497"; | exon_number | "3"; | gene_type | " |
| At_chr12 | Cufflinks | exon | 53964964 | 53965307 | . | + | . | gene_id | "XLOC_034310"; | transcript_id | "Novel_000497"; | exon_number | "4"; | gene_type | " |
| At_chr12 | Cufflinks | exon | 53964161 | 53964587 | . | + | . | gene_id | "XLOC_034310"; | transcript_id | "Novel_000498"; | exon_number | "1"; | gene_type | " |
| At_chr12 | Cufflinks | exon | 53964669 | 53964883 | . | + | . | gene_id | "XLOC_034310"; | transcript_id | "Novel_000498"; | exon_number | "2"; | gene_type | " |
| At_chr12 | Cufflinks | exon | 53964964 | 53965307 | . | + | . | gene_id | "XLOC_034310"; | transcript_id | "Novel_000498"; | exon_number | "3"; | gene_type | " |
| At_chr12 | Cufflinks | exon | 54353069 | 54353376 | . | + | . | gene_id | "XLOC_034364"; | transcript_id | "Novel_000499"; | exon_number | "1"; | gene_type | " |
| At_chr12 | Cufflinks | exon | 54354927 | 54355633 | . | + | . | gene_id | "XLOC_034364"; | transcript_id | "Novel_000499"; | exon_number | "2"; | gene_type | " |
| At_chr12 | Cufflinks | exon | 54355746 | 54355840 | . | + | . | gene_id | "XLOC_034364"; | transcript_id | "Novel_000499"; | exon_number | "3"; | gene_type | " |
| At_chr12 | Cufflinks | exon | 54356033 | 54356104 | . | + | . | gene_id | "XLOC_034364"; | transcript_id | "Novel_000499"; | exon_number | "4"; | gene_type | " |
| At_chr12 | Cufflinks | exon | 54356210 | 54356371 | . | + | . | gene_id | "XLOC_034364"; | transcript_id | "Novel_000499"; | exon_number | "5"; | gene_type | " |
| At_chr12 | Cufflinks | exon | 54356452 | 54356520 | . | + | . | gene_id | "XLOC_034364"; | transcript_id | "Novel_000499"; | exon_number | "6"; | gene_type | " |
| At_chr12 | Cufflinks | exon | 56852671 | 56853400 | . | + | . | gene_id | "XLOC_034483"; | transcript_id | "Novel_000500"; | exon_number | "1"; | gene_type | " |
| At_chr12 | Cufflinks | exon | 56853518 | 56853580 | . | + | . | gene_id | "XLOC_034483"; | transcript_id | "Novel_000500"; | exon_number | "2"; | gene_type | " |
| At_chr12 | Cufflinks | exon | 56862941 | 56863110 | . | + | . | gene_id | "XLOC_034483"; | transcript_id | "Novel_000500"; | exon_number | "3"; | gene_type | " |
| At_chr12 | Cufflinks | exon | 56863207 | 56863831 | . | + | . | gene_id | "XLOC_034483"; | transcript_id | "Novel_000500"; | exon_number | "4"; | gene_type | " |
| At_chr12 | Cufflinks | exon | 56852671 | 56853400 | . | + | . | gene_id | "XLOC_034483"; | transcript_id | "Novel_000501"; | exon_number | "1"; | gene_type | " |
| At_chr12 | Cufflinks | exon | 56853518 | 56853580 | . | + | . | gene_id | "XLOC_034483"; | transcript_id | "Novel_000501"; | exon_number | "2"; | gene_type | " |
| At_chr12 | Cufflinks | exon | 56862931 | 56863110 | . | + | . | gene_id | "XLOC_034483"; | transcript_id | "Novel_000501"; | exon_number | "3"; | gene_type | " |
| At_chr12 | Cufflinks | exon | 56863207 | 56863831 | . | + | . | gene_id | "XLOC_034483"; | transcript_id | "Novel_000501"; | exon_number | "4"; | gene_type | " |
| At_chr12 | Cufflinks | exon | 68239634 | 68241266 | . | + | . | gene_id | "XLOC_034934"; | transcript_id | "Novel_000502"; | exon_number | "1"; | gene_type | " |
| At_chr12 | Cufflinks | exon | 68241656 | 68241898 | . | + | . | gene_id | "XLOC_034934"; | transcript_id | "Novel_000502"; | exon_number | "2"; | gene_type | " |
| At_chr12 | Cufflinks | exon | 70120878 | 70121508 | . | + | . | gene_id | "XLOC_034999"; | transcript_id | "Novel_000503"; | exon_number | "1"; | gene_type | " |
| At_chr12 | Cufflinks | exon | 70122114 | 70122164 | . | + | . | gene_id | "XLOC_034999"; | transcript_id | "Novel_000503"; | exon_number | "2"; | gene_type | " |
| At_chr12 | Cufflinks | exon | 70122849 | 70123134 | . | + | . | gene_id | "XLOC_034999"; | transcript_id | "Novel_000503"; | exon_number | "3"; | gene_type | " |
| At_chr12 | Cufflinks | exon | 70120979 | 70122029 | . | + | . | gene_id | "XLOC_034999"; | transcript_id | "Novel_000504"; | exon_number | "1"; | gene_type | " |
| At_chr12 | Cufflinks | exon | 70122114 | 70122164 | . | + | . | gene_id | "XLOC_034999"; | transcript_id | "Novel_000504"; | exon_number | "2"; | gene_type | " |
| At_chr12 | Cufflinks | exon | 70122849 | 70123105 | . | + | . | gene_id | "XLOC_034999"; | transcript_id | "Novel_000504"; | exon_number | "3"; | gene_type | " |

|          |           |      |          |          |   |   |   |         |                |               |                 |             |       |           |   |
|----------|-----------|------|----------|----------|---|---|---|---------|----------------|---------------|-----------------|-------------|-------|-----------|---|
| At_chr12 | Cufflinks | exon | 71878569 | 71878607 | . | + | . | gene_id | "XLOC_035052"; | transcript_id | "Novel_000505"; | exon_number | "1";  | gene_type | " |
| At_chr12 | Cufflinks | exon | 71879162 | 71879377 | . | + | . | gene_id | "XLOC_035052"; | transcript_id | "Novel_000505"; | exon_number | "2";  | gene_type | " |
| At_chr12 | Cufflinks | exon | 71883356 | 71883397 | . | + | . | gene_id | "XLOC_035052"; | transcript_id | "Novel_000506"; | exon_number | "1";  | gene_type | " |
| At_chr12 | Cufflinks | exon | 71883981 | 71884079 | . | + | . | gene_id | "XLOC_035052"; | transcript_id | "Novel_000506"; | exon_number | "2";  | gene_type | " |
| At_chr12 | Cufflinks | exon | 71885017 | 71885110 | . | + | . | gene_id | "XLOC_035052"; | transcript_id | "Novel_000506"; | exon_number | "3";  | gene_type | " |
| At_chr12 | Cufflinks | exon | 80697646 | 80697939 | . | + | . | gene_id | "XLOC_035364"; | transcript_id | "Novel_000507"; | exon_number | "1";  | gene_type | " |
| At_chr12 | Cufflinks | exon | 80698191 | 80699722 | . | + | . | gene_id | "XLOC_035364"; | transcript_id | "Novel_000507"; | exon_number | "2";  | gene_type | " |
| At_chr12 | Cufflinks | exon | 81717079 | 81717217 | . | + | . | gene_id | "XLOC_035412"; | transcript_id | "Novel_000508"; | exon_number | "1";  | gene_type | " |
| At_chr12 | Cufflinks | exon | 81717297 | 81717398 | . | + | . | gene_id | "XLOC_035412"; | transcript_id | "Novel_000508"; | exon_number | "2";  | gene_type | " |
| At_chr12 | Cufflinks | exon | 81717962 | 81718069 | . | + | . | gene_id | "XLOC_035412"; | transcript_id | "Novel_000508"; | exon_number | "3";  | gene_type | " |
| At_chr12 | Cufflinks | exon | 81718189 | 81718679 | . | + | . | gene_id | "XLOC_035412"; | transcript_id | "Novel_000508"; | exon_number | "4";  | gene_type | " |
| At_chr12 | Cufflinks | exon | 89660679 | 89661076 | . | + | . | gene_id | "XLOC_035718"; | transcript_id | "Novel_000509"; | exon_number | "1";  | gene_type | " |
| At_chr12 | Cufflinks | exon | 89661313 | 89661449 | . | + | . | gene_id | "XLOC_035718"; | transcript_id | "Novel_000509"; | exon_number | "2";  | gene_type | " |
| At_chr12 | Cufflinks | exon | 89661551 | 89661712 | . | + | . | gene_id | "XLOC_035718"; | transcript_id | "Novel_000509"; | exon_number | "3";  | gene_type | " |
| At_chr12 | Cufflinks | exon | 89661855 | 89662129 | . | + | . | gene_id | "XLOC_035718"; | transcript_id | "Novel_000509"; | exon_number | "4";  | gene_type | " |
| At_chr12 | Cufflinks | exon | 89662218 | 89662355 | . | + | . | gene_id | "XLOC_035718"; | transcript_id | "Novel_000509"; | exon_number | "5";  | gene_type | " |
| At_chr12 | Cufflinks | exon | 89662534 | 89662725 | . | + | . | gene_id | "XLOC_035718"; | transcript_id | "Novel_000509"; | exon_number | "6";  | gene_type | " |
| At_chr12 | Cufflinks | exon | 89662805 | 89662903 | . | + | . | gene_id | "XLOC_035718"; | transcript_id | "Novel_000509"; | exon_number | "7";  | gene_type | " |
| At_chr12 | Cufflinks | exon | 89663070 | 89663557 | . | + | . | gene_id | "XLOC_035718"; | transcript_id | "Novel_000509"; | exon_number | "8";  | gene_type | " |
| At_chr12 | Cufflinks | exon | 89662099 | 89662355 | . | + | . | gene_id | "XLOC_035718"; | transcript_id | "Novel_000510"; | exon_number | "1";  | gene_type | " |
| At_chr12 | Cufflinks | exon | 89662534 | 89662725 | . | + | . | gene_id | "XLOC_035718"; | transcript_id | "Novel_000510"; | exon_number | "2";  | gene_type | " |
| At_chr12 | Cufflinks | exon | 89662805 | 89662903 | . | + | . | gene_id | "XLOC_035718"; | transcript_id | "Novel_000510"; | exon_number | "3";  | gene_type | " |
| At_chr12 | Cufflinks | exon | 89663070 | 89663517 | . | + | . | gene_id | "XLOC_035718"; | transcript_id | "Novel_000510"; | exon_number | "4";  | gene_type | " |
| At_chr12 | Cufflinks | exon | 90130517 | 90130977 | . | + | . | gene_id | "XLOC_035731"; | transcript_id | "Novel_000511"; | exon_number | "1";  | gene_type | " |
| At_chr12 | Cufflinks | exon | 90131242 | 90131530 | . | + | . | gene_id | "XLOC_035731"; | transcript_id | "Novel_000511"; | exon_number | "2";  | gene_type | " |
| At_chr12 | Cufflinks | exon | 90131633 | 90131732 | . | + | . | gene_id | "XLOC_035731"; | transcript_id | "Novel_000511"; | exon_number | "3";  | gene_type | " |
| At_chr12 | Cufflinks | exon | 90131937 | 90132203 | . | + | . | gene_id | "XLOC_035731"; | transcript_id | "Novel_000511"; | exon_number | "4";  | gene_type | " |
| At_chr12 | Cufflinks | exon | 90132321 | 90132398 | . | + | . | gene_id | "XLOC_035731"; | transcript_id | "Novel_000511"; | exon_number | "5";  | gene_type | " |
| At_chr12 | Cufflinks | exon | 90132529 | 90132630 | . | + | . | gene_id | "XLOC_035731"; | transcript_id | "Novel_000511"; | exon_number | "6";  | gene_type | " |
| At_chr12 | Cufflinks | exon | 90132729 | 90132778 | . | + | . | gene_id | "XLOC_035731"; | transcript_id | "Novel_000511"; | exon_number | "7";  | gene_type | " |
| At_chr12 | Cufflinks | exon | 90132867 | 90132966 | . | + | . | gene_id | "XLOC_035731"; | transcript_id | "Novel_000511"; | exon_number | "8";  | gene_type | " |
| At_chr12 | Cufflinks | exon | 90133071 | 90133136 | . | + | . | gene_id | "XLOC_035731"; | transcript_id | "Novel_000511"; | exon_number | "9";  | gene_type | " |
| At_chr12 | Cufflinks | exon | 90133218 | 90133331 | . | + | . | gene_id | "XLOC_035731"; | transcript_id | "Novel_000511"; | exon_number | "10"; | gene_type | " |
| At_chr12 | Cufflinks | exon | 90133531 | 90133666 | . | + | . | gene_id | "XLOC_035731"; | transcript_id | "Novel_000511"; | exon_number | "11"; | gene_type | " |
| At_chr12 | Cufflinks | exon | 90134121 | 90134512 | . | + | . | gene_id | "XLOC_035731"; | transcript_id | "Novel_000511"; | exon_number | "12"; | gene_type | " |

|          |           |      |          |          |   |   |   |         |                |               |                 |             |       |           |  |
|----------|-----------|------|----------|----------|---|---|---|---------|----------------|---------------|-----------------|-------------|-------|-----------|--|
| At_chr12 | Cufflinks | exon | 90134783 | 90134857 | . | + | . | gene_id | "XLOC_035731"; | transcript_id | "Novel_000511"; | exon_number | "13"; | gene_type |  |
| At_chr12 | Cufflinks | exon | 90134971 | 90135218 | . | + | . | gene_id | "XLOC_035731"; | transcript_id | "Novel_000511"; | exon_number | "14"; | gene_type |  |
| At_chr12 | Cufflinks | exon | 90130715 | 90131530 | . | + | . | gene_id | "XLOC_035731"; | transcript_id | "Novel_000512"; | exon_number | "1";  | gene_type |  |
| At_chr12 | Cufflinks | exon | 90131633 | 90131732 | . | + | . | gene_id | "XLOC_035731"; | transcript_id | "Novel_000512"; | exon_number | "2";  | gene_type |  |
| At_chr12 | Cufflinks | exon | 90131937 | 90132203 | . | + | . | gene_id | "XLOC_035731"; | transcript_id | "Novel_000512"; | exon_number | "3";  | gene_type |  |
| At_chr12 | Cufflinks | exon | 90132321 | 90132398 | . | + | . | gene_id | "XLOC_035731"; | transcript_id | "Novel_000512"; | exon_number | "4";  | gene_type |  |
| At_chr12 | Cufflinks | exon | 90132529 | 90132630 | . | + | . | gene_id | "XLOC_035731"; | transcript_id | "Novel_000512"; | exon_number | "5";  | gene_type |  |
| At_chr12 | Cufflinks | exon | 90132729 | 90132778 | . | + | . | gene_id | "XLOC_035731"; | transcript_id | "Novel_000512"; | exon_number | "6";  | gene_type |  |
| At_chr12 | Cufflinks | exon | 90132867 | 90132966 | . | + | . | gene_id | "XLOC_035731"; | transcript_id | "Novel_000512"; | exon_number | "7";  | gene_type |  |
| At_chr12 | Cufflinks | exon | 90133071 | 90133136 | . | + | . | gene_id | "XLOC_035731"; | transcript_id | "Novel_000512"; | exon_number | "8";  | gene_type |  |
| At_chr12 | Cufflinks | exon | 90133218 | 90133331 | . | + | . | gene_id | "XLOC_035731"; | transcript_id | "Novel_000512"; | exon_number | "9";  | gene_type |  |
| At_chr12 | Cufflinks | exon | 90133531 | 90133666 | . | + | . | gene_id | "XLOC_035731"; | transcript_id | "Novel_000512"; | exon_number | "10"; | gene_type |  |
| At_chr12 | Cufflinks | exon | 90134121 | 90134512 | . | + | . | gene_id | "XLOC_035731"; | transcript_id | "Novel_000512"; | exon_number | "11"; | gene_type |  |
| At_chr12 | Cufflinks | exon | 90134783 | 90134857 | . | + | . | gene_id | "XLOC_035731"; | transcript_id | "Novel_000512"; | exon_number | "12"; | gene_type |  |
| At_chr12 | Cufflinks | exon | 90134971 | 90135346 | . | + | . | gene_id | "XLOC_035731"; | transcript_id | "Novel_000512"; | exon_number | "13"; | gene_type |  |
| At_chr12 | Cufflinks | exon | 90131926 | 90132203 | . | + | . | gene_id | "XLOC_035731"; | transcript_id | "Novel_000513"; | exon_number | "1";  | gene_type |  |
| At_chr12 | Cufflinks | exon | 90132321 | 90132398 | . | + | . | gene_id | "XLOC_035731"; | transcript_id | "Novel_000513"; | exon_number | "2";  | gene_type |  |
| At_chr12 | Cufflinks | exon | 90132529 | 90132630 | . | + | . | gene_id | "XLOC_035731"; | transcript_id | "Novel_000513"; | exon_number | "3";  | gene_type |  |
| At_chr12 | Cufflinks | exon | 90132729 | 90132778 | . | + | . | gene_id | "XLOC_035731"; | transcript_id | "Novel_000513"; | exon_number | "4";  | gene_type |  |
| At_chr12 | Cufflinks | exon | 90132880 | 90132966 | . | + | . | gene_id | "XLOC_035731"; | transcript_id | "Novel_000513"; | exon_number | "5";  | gene_type |  |
| At_chr12 | Cufflinks | exon | 90133071 | 90133136 | . | + | . | gene_id | "XLOC_035731"; | transcript_id | "Novel_000513"; | exon_number | "6";  | gene_type |  |
| At_chr12 | Cufflinks | exon | 90133218 | 90133331 | . | + | . | gene_id | "XLOC_035731"; | transcript_id | "Novel_000513"; | exon_number | "7";  | gene_type |  |
| At_chr12 | Cufflinks | exon | 90133531 | 90133666 | . | + | . | gene_id | "XLOC_035731"; | transcript_id | "Novel_000513"; | exon_number | "8";  | gene_type |  |
| At_chr12 | Cufflinks | exon | 90134121 | 90134512 | . | + | . | gene_id | "XLOC_035731"; | transcript_id | "Novel_000513"; | exon_number | "9";  | gene_type |  |
| At_chr12 | Cufflinks | exon | 90134783 | 90134857 | . | + | . | gene_id | "XLOC_035731"; | transcript_id | "Novel_000513"; | exon_number | "10"; | gene_type |  |
| At_chr12 | Cufflinks | exon | 90134971 | 90135252 | . | + | . | gene_id | "XLOC_035731"; | transcript_id | "Novel_000513"; | exon_number | "11"; | gene_type |  |
| At_chr12 | Cufflinks | exon | 93942152 | 93942231 | . | + | . | gene_id | "XLOC_035820"; | transcript_id | "Novel_000514"; | exon_number | "1";  | gene_type |  |
| At_chr12 | Cufflinks | exon | 93944574 | 93944637 | . | + | . | gene_id | "XLOC_035820"; | transcript_id | "Novel_000514"; | exon_number | "2";  | gene_type |  |
| At_chr12 | Cufflinks | exon | 93944933 | 93944997 | . | + | . | gene_id | "XLOC_035820"; | transcript_id | "Novel_000514"; | exon_number | "3";  | gene_type |  |
| At_chr12 | Cufflinks | exon | 93945468 | 93945567 | . | + | . | gene_id | "XLOC_035820"; | transcript_id | "Novel_000514"; | exon_number | "4";  | gene_type |  |
| At_chr12 | Cufflinks | exon | 93945668 | 93945856 | . | + | . | gene_id | "XLOC_035820"; | transcript_id | "Novel_000514"; | exon_number | "5";  | gene_type |  |
| At_chr12 | Cufflinks | exon | 95041859 | 95042386 | . | + | . | gene_id | "XLOC_035931"; | transcript_id | "Novel_000515"; | exon_number | "1";  | gene_type |  |
| At_chr12 | Cufflinks | exon | 95042460 | 95045709 | . | + | . | gene_id | "XLOC_035931"; | transcript_id | "Novel_000515"; | exon_number | "2";  | gene_type |  |
| At_chr12 | Cufflinks | exon | 96374357 | 96374526 | . | + | . | gene_id | "XLOC_035999"; | transcript_id | "Novel_000516"; | exon_number | "1";  | gene_type |  |
| At_chr12 | Cufflinks | exon | 96374830 | 96375269 | . | + | . | gene_id | "XLOC_035999"; | transcript_id | "Novel_000516"; | exon_number | "2";  | gene_type |  |

|          |           |      |          |          |   |   |   |         |                |               |                 |             |      |           |   |
|----------|-----------|------|----------|----------|---|---|---|---------|----------------|---------------|-----------------|-------------|------|-----------|---|
| At_chr12 | Cufflinks | exon | 96374357 | 96374526 | . | + | . | gene_id | "XLOC_035999"; | transcript_id | "Novel_000517"; | exon_number | "1"; | gene_type | " |
| At_chr12 | Cufflinks | exon | 96374845 | 96375269 | . | + | . | gene_id | "XLOC_035999"; | transcript_id | "Novel_000517"; | exon_number | "2"; | gene_type | " |
| At_chr12 | Cufflinks | exon | 98721096 | 98721928 | . | + | . | gene_id | "XLOC_036089"; | transcript_id | "Novel_000518"; | exon_number | "1"; | gene_type | " |
| At_chr12 | Cufflinks | exon | 99946201 | 99947205 | . | + | . | gene_id | "XLOC_036149"; | transcript_id | "Novel_000519"; | exon_number | "1"; | gene_type | " |
| At_chr12 | Cufflinks | exon | 99947318 | 99947357 | . | + | . | gene_id | "XLOC_036149"; | transcript_id | "Novel_000519"; | exon_number | "2"; | gene_type | " |
| At_chr12 | Cufflinks | exon | 99948228 | 99948817 | . | + | . | gene_id | "XLOC_036149"; | transcript_id | "Novel_000519"; | exon_number | "3"; | gene_type | " |
| At_chr12 | Cufflinks | exon | 7175969  | 7176123  | . | - | . | gene_id | "XLOC_036425"; | transcript_id | "Novel_000520"; | exon_number | "1"; | gene_type | " |
| At_chr12 | Cufflinks | exon | 7176208  | 7176284  | . | - | . | gene_id | "XLOC_036425"; | transcript_id | "Novel_000520"; | exon_number | "2"; | gene_type | " |
| At_chr12 | Cufflinks | exon | 15389527 | 15389922 | . | - | . | gene_id | "XLOC_036713"; | transcript_id | "Novel_000521"; | exon_number | "1"; | gene_type | " |
| At_chr12 | Cufflinks | exon | 15390183 | 15390326 | . | - | . | gene_id | "XLOC_036713"; | transcript_id | "Novel_000521"; | exon_number | "2"; | gene_type | " |
| At_chr12 | Cufflinks | exon | 15390439 | 15390509 | . | - | . | gene_id | "XLOC_036713"; | transcript_id | "Novel_000521"; | exon_number | "3"; | gene_type | " |
| At_chr12 | Cufflinks | exon | 15391853 | 15391952 | . | - | . | gene_id | "XLOC_036713"; | transcript_id | "Novel_000521"; | exon_number | "4"; | gene_type | " |
| At_chr12 | Cufflinks | exon | 15392551 | 15392581 | . | - | . | gene_id | "XLOC_036713"; | transcript_id | "Novel_000521"; | exon_number | "5"; | gene_type | " |
| At_chr12 | Cufflinks | exon | 15392742 | 15392839 | . | - | . | gene_id | "XLOC_036713"; | transcript_id | "Novel_000521"; | exon_number | "6"; | gene_type | " |
| At_chr12 | Cufflinks | exon | 15393522 | 15393969 | . | - | . | gene_id | "XLOC_036713"; | transcript_id | "Novel_000521"; | exon_number | "7"; | gene_type | " |
| At_chr12 | Cufflinks | exon | 15390369 | 15392581 | . | - | . | gene_id | "XLOC_036713"; | transcript_id | "Novel_000522"; | exon_number | "1"; | gene_type | " |
| At_chr12 | Cufflinks | exon | 15392742 | 15392839 | . | - | . | gene_id | "XLOC_036713"; | transcript_id | "Novel_000522"; | exon_number | "2"; | gene_type | " |
| At_chr12 | Cufflinks | exon | 15393522 | 15393969 | . | - | . | gene_id | "XLOC_036713"; | transcript_id | "Novel_000522"; | exon_number | "3"; | gene_type | " |
| At_chr12 | Cufflinks | exon | 16827168 | 16827407 | . | - | . | gene_id | "XLOC_036760"; | transcript_id | "Novel_000523"; | exon_number | "1"; | gene_type | " |
| At_chr12 | Cufflinks | exon | 29489861 | 29490190 | . | - | . | gene_id | "XLOC_037140"; | transcript_id | "Novel_000524"; | exon_number | "1"; | gene_type | " |
| At_chr12 | Cufflinks | exon | 29491180 | 29491346 | . | - | . | gene_id | "XLOC_037140"; | transcript_id | "Novel_000524"; | exon_number | "2"; | gene_type | " |
| At_chr12 | Cufflinks | exon | 29491901 | 29492267 | . | - | . | gene_id | "XLOC_037140"; | transcript_id | "Novel_000524"; | exon_number | "3"; | gene_type | " |
| At_chr12 | Cufflinks | exon | 29489861 | 29490190 | . | - | . | gene_id | "XLOC_037140"; | transcript_id | "Novel_000525"; | exon_number | "1"; | gene_type | " |
| At_chr12 | Cufflinks | exon | 29491180 | 29492267 | . | - | . | gene_id | "XLOC_037140"; | transcript_id | "Novel_000525"; | exon_number | "2"; | gene_type | " |
| At_chr12 | Cufflinks | exon | 42219479 | 42220079 | . | - | . | gene_id | "XLOC_037573"; | transcript_id | "Novel_000526"; | exon_number | "1"; | gene_type | " |
| At_chr12 | Cufflinks | exon | 42220412 | 42220573 | . | - | . | gene_id | "XLOC_037573"; | transcript_id | "Novel_000526"; | exon_number | "2"; | gene_type | " |
| At_chr12 | Cufflinks | exon | 42220784 | 42221087 | . | - | . | gene_id | "XLOC_037573"; | transcript_id | "Novel_000526"; | exon_number | "3"; | gene_type | " |
| At_chr12 | Cufflinks | exon | 42244663 | 42245395 | . | - | . | gene_id | "XLOC_037581"; | transcript_id | "Novel_000527"; | exon_number | "1"; | gene_type | " |
| At_chr12 | Cufflinks | exon | 42246100 | 42246262 | . | - | . | gene_id | "XLOC_037581"; | transcript_id | "Novel_000527"; | exon_number | "2"; | gene_type | " |
| At_chr12 | Cufflinks | exon | 43834327 | 43834397 | . | - | . | gene_id | "XLOC_037765"; | transcript_id | "Novel_000528"; | exon_number | "1"; | gene_type | " |
| At_chr12 | Cufflinks | exon | 43834479 | 43834607 | . | - | . | gene_id | "XLOC_037765"; | transcript_id | "Novel_000528"; | exon_number | "2"; | gene_type | " |
| At_chr12 | Cufflinks | exon | 44258179 | 44258605 | . | - | . | gene_id | "XLOC_037809"; | transcript_id | "Novel_000529"; | exon_number | "1"; | gene_type | " |
| At_chr12 | Cufflinks | exon | 44260294 | 44260524 | . | - | . | gene_id | "XLOC_037809"; | transcript_id | "Novel_000529"; | exon_number | "2"; | gene_type | " |
| At_chr12 | Cufflinks | exon | 44465282 | 44466003 | . | - | . | gene_id | "XLOC_037840"; | transcript_id | "Novel_000530"; | exon_number | "1"; | gene_type | " |
| At_chr12 | Cufflinks | exon | 44466115 | 44466213 | . | - | . | gene_id | "XLOC_037840"; | transcript_id | "Novel_000530"; | exon_number | "2"; | gene_type | " |



|          |           |      |          |          |   |   |         |                |               |                 |             |      |           |   |
|----------|-----------|------|----------|----------|---|---|---------|----------------|---------------|-----------------|-------------|------|-----------|---|
| At_chr12 | Cufflinks | exon | 45552836 | 45554526 | . | . | gene_id | "XLOC_037981"; | transcript_id | "Novel_000531"; | exon_number | "1"; | gene_type | " |
| At_chr12 | Cufflinks | exon | 45555515 | 45555684 | . | . | gene_id | "XLOC_037981"; | transcript_id | "Novel_000531"; | exon_number | "2"; | gene_type | " |
| At_chr12 | Cufflinks | exon | 45552844 | 45553434 | . | . | gene_id | "XLOC_037981"; | transcript_id | "Novel_000532"; | exon_number | "1"; | gene_type | " |
| At_chr12 | Cufflinks | exon | 45553565 | 45554526 | . | . | gene_id | "XLOC_037981"; | transcript_id | "Novel_000532"; | exon_number | "2"; | gene_type | " |
| At_chr12 | Cufflinks | exon | 45555515 | 45555692 | . | . | gene_id | "XLOC_037981"; | transcript_id | "Novel_000532"; | exon_number | "3"; | gene_type | " |
| At_chr12 | Cufflinks | exon | 45552967 | 45553434 | . | . | gene_id | "XLOC_037981"; | transcript_id | "Novel_000533"; | exon_number | "1"; | gene_type | " |
| At_chr12 | Cufflinks | exon | 45553536 | 45554526 | . | . | gene_id | "XLOC_037981"; | transcript_id | "Novel_000533"; | exon_number | "2"; | gene_type | " |
| At_chr12 | Cufflinks | exon | 45555515 | 45555711 | . | . | gene_id | "XLOC_037981"; | transcript_id | "Novel_000533"; | exon_number | "3"; | gene_type | " |
| At_chr12 | Cufflinks | exon | 52801013 | 52801387 | . | . | gene_id | "XLOC_038459"; | transcript_id | "Novel_000534"; | exon_number | "1"; | gene_type | " |
| At_chr12 | Cufflinks | exon | 52801492 | 52801570 | . | . | gene_id | "XLOC_038459"; | transcript_id | "Novel_000534"; | exon_number | "2"; | gene_type | " |
| At_chr12 | Cufflinks | exon | 52801749 | 52801791 | . | . | gene_id | "XLOC_038459"; | transcript_id | "Novel_000534"; | exon_number | "3"; | gene_type | " |
| At_chr12 | Cufflinks | exon | 52802102 | 52802317 | . | . | gene_id | "XLOC_038459"; | transcript_id | "Novel_000534"; | exon_number | "4"; | gene_type | " |
| At_chr12 | Cufflinks | exon | 52802654 | 52802746 | . | . | gene_id | "XLOC_038459"; | transcript_id | "Novel_000534"; | exon_number | "5"; | gene_type | " |
| At_chr12 | Cufflinks | exon | 52802934 | 52802973 | . | . | gene_id | "XLOC_038459"; | transcript_id | "Novel_000534"; | exon_number | "6"; | gene_type | " |
| At_chr12 | Cufflinks | exon | 52803075 | 52803131 | . | . | gene_id | "XLOC_038459"; | transcript_id | "Novel_000534"; | exon_number | "7"; | gene_type | " |
| At_chr12 | Cufflinks | exon | 52804058 | 52804126 | . | . | gene_id | "XLOC_038459"; | transcript_id | "Novel_000534"; | exon_number | "8"; | gene_type | " |
| At_chr12 | Cufflinks | exon | 52804216 | 52804702 | . | . | gene_id | "XLOC_038459"; | transcript_id | "Novel_000534"; | exon_number | "9"; | gene_type | " |
| At_chr12 | Cufflinks | exon | 52802880 | 52803131 | . | . | gene_id | "XLOC_038459"; | transcript_id | "Novel_000535"; | exon_number | "1"; | gene_type | " |
| At_chr12 | Cufflinks | exon | 52804058 | 52804126 | . | . | gene_id | "XLOC_038459"; | transcript_id | "Novel_000535"; | exon_number | "2"; | gene_type | " |
| At_chr12 | Cufflinks | exon | 52804216 | 52804575 | . | . | gene_id | "XLOC_038459"; | transcript_id | "Novel_000535"; | exon_number | "3"; | gene_type | " |
| At_chr12 | Cufflinks | exon | 53857231 | 53857513 | . | . | gene_id | "XLOC_038555"; | transcript_id | "Novel_000536"; | exon_number | "1"; | gene_type | " |
| At_chr12 | Cufflinks | exon | 54081694 | 54083371 | . | . | gene_id | "XLOC_038586"; | transcript_id | "Novel_000537"; | exon_number | "1"; | gene_type | " |
| At_chr12 | Cufflinks | exon | 54083601 | 54083673 | . | . | gene_id | "XLOC_038586"; | transcript_id | "Novel_000537"; | exon_number | "2"; | gene_type | " |
| At_chr12 | Cufflinks | exon | 54083982 | 54084077 | . | . | gene_id | "XLOC_038586"; | transcript_id | "Novel_000537"; | exon_number | "3"; | gene_type | " |
| At_chr12 | Cufflinks | exon | 54084289 | 54084352 | . | . | gene_id | "XLOC_038586"; | transcript_id | "Novel_000537"; | exon_number | "4"; | gene_type | " |
| At_chr12 | Cufflinks | exon | 54084665 | 54084716 | . | . | gene_id | "XLOC_038586"; | transcript_id | "Novel_000537"; | exon_number | "5"; | gene_type | " |
| At_chr12 | Cufflinks | exon | 54085190 | 54085287 | . | . | gene_id | "XLOC_038586"; | transcript_id | "Novel_000537"; | exon_number | "6"; | gene_type | " |
| At_chr12 | Cufflinks | exon | 54085387 | 54085445 | . | . | gene_id | "XLOC_038586"; | transcript_id | "Novel_000537"; | exon_number | "7"; | gene_type | " |
| At_chr12 | Cufflinks | exon | 54085707 | 54085973 | . | . | gene_id | "XLOC_038586"; | transcript_id | "Novel_000537"; | exon_number | "8"; | gene_type | " |
| At_chr12 | Cufflinks | exon | 65288598 | 65288706 | . | . | gene_id | "XLOC_039001"; | transcript_id | "Novel_000538"; | exon_number | "1"; | gene_type | " |
| At_chr12 | Cufflinks | exon | 65288918 | 65289126 | . | . | gene_id | "XLOC_039001"; | transcript_id | "Novel_000538"; | exon_number | "2"; | gene_type | " |
| At_chr12 | Cufflinks | exon | 81578751 | 81579171 | . | . | gene_id | "XLOC_039521"; | transcript_id | "Novel_000539"; | exon_number | "1"; | gene_type | " |
| At_chr12 | Cufflinks | exon | 81579246 | 81579585 | . | . | gene_id | "XLOC_039521"; | transcript_id | "Novel_000539"; | exon_number | "2"; | gene_type | " |
| At_chr12 | Cufflinks | exon | 81582445 | 81582821 | . | . | gene_id | "XLOC_039522"; | transcript_id | "Novel_000540"; | exon_number | "1"; | gene_type | " |
| At_chr12 | Cufflinks | exon | 81583482 | 81584174 | . | . | gene_id | "XLOC_039522"; | transcript_id | "Novel_000540"; | exon_number | "2"; | gene_type | " |

|          |           |      |          |          |   |   |   |         |                |               |                 |             |      |           |   |
|----------|-----------|------|----------|----------|---|---|---|---------|----------------|---------------|-----------------|-------------|------|-----------|---|
| At_chr12 | Cufflinks | exon | 82132948 | 82133404 | . | - | . | gene_id | "XLOC_039551"; | transcript_id | "Novel_000541"; | exon_number | "1"; | gene_type | " |
| At_chr12 | Cufflinks | exon | 82133519 | 82134750 | . | - | . | gene_id | "XLOC_039551"; | transcript_id | "Novel_000541"; | exon_number | "2"; | gene_type | " |
| At_chr12 | Cufflinks | exon | 90208924 | 90209154 | . | - | . | gene_id | "XLOC_039878"; | transcript_id | "Novel_000542"; | exon_number | "1"; | gene_type | " |
| At_chr12 | Cufflinks | exon | 91111457 | 91114890 | . | - | . | gene_id | "XLOC_039900"; | transcript_id | "Novel_000543"; | exon_number | "1"; | gene_type | " |
| At_chr12 | Cufflinks | exon | 91115301 | 91116557 | . | - | . | gene_id | "XLOC_039900"; | transcript_id | "Novel_000543"; | exon_number | "2"; | gene_type | " |
| At_chr12 | Cufflinks | exon | 91111458 | 91114303 | . | - | . | gene_id | "XLOC_039900"; | transcript_id | "Novel_000544"; | exon_number | "1"; | gene_type | " |
| At_chr12 | Cufflinks | exon | 91114834 | 91114890 | . | - | . | gene_id | "XLOC_039900"; | transcript_id | "Novel_000544"; | exon_number | "2"; | gene_type | " |
| At_chr12 | Cufflinks | exon | 91116940 | 91117290 | . | - | . | gene_id | "XLOC_039900"; | transcript_id | "Novel_000544"; | exon_number | "3"; | gene_type | " |
| At_chr12 | Cufflinks | exon | 91117372 | 91117468 | . | - | . | gene_id | "XLOC_039900"; | transcript_id | "Novel_000544"; | exon_number | "4"; | gene_type | " |
| At_chr12 | Cufflinks | exon | 91111483 | 91114890 | . | - | . | gene_id | "XLOC_039900"; | transcript_id | "Novel_000545"; | exon_number | "1"; | gene_type | " |
| At_chr12 | Cufflinks | exon | 91117194 | 91117290 | . | - | . | gene_id | "XLOC_039900"; | transcript_id | "Novel_000545"; | exon_number | "2"; | gene_type | " |
| At_chr12 | Cufflinks | exon | 91117372 | 91117444 | . | - | . | gene_id | "XLOC_039900"; | transcript_id | "Novel_000545"; | exon_number | "3"; | gene_type | " |
| At_chr12 | Cufflinks | exon | 94200408 | 94200498 | . | - | . | gene_id | "XLOC_040034"; | transcript_id | "Novel_000546"; | exon_number | "1"; | gene_type | " |
| At_chr12 | Cufflinks | exon | 94200621 | 94201164 | . | - | . | gene_id | "XLOC_040034"; | transcript_id | "Novel_000546"; | exon_number | "2"; | gene_type | " |
| At_chr12 | Cufflinks | exon | 94200408 | 94200498 | . | - | . | gene_id | "XLOC_040034"; | transcript_id | "Novel_000547"; | exon_number | "1"; | gene_type | " |
| At_chr12 | Cufflinks | exon | 94200621 | 94200713 | . | - | . | gene_id | "XLOC_040034"; | transcript_id | "Novel_000547"; | exon_number | "2"; | gene_type | " |
| At_chr12 | Cufflinks | exon | 94201286 | 94201460 | . | - | . | gene_id | "XLOC_040034"; | transcript_id | "Novel_000547"; | exon_number | "3"; | gene_type | " |
| At_chr12 | Cufflinks | exon | 94200413 | 94200498 | . | - | . | gene_id | "XLOC_040034"; | transcript_id | "Novel_000548"; | exon_number | "1"; | gene_type | " |
| At_chr12 | Cufflinks | exon | 94200621 | 94200713 | . | - | . | gene_id | "XLOC_040034"; | transcript_id | "Novel_000548"; | exon_number | "2"; | gene_type | " |
| At_chr12 | Cufflinks | exon | 94201286 | 94201360 | . | - | . | gene_id | "XLOC_040034"; | transcript_id | "Novel_000548"; | exon_number | "3"; | gene_type | " |
| At_chr12 | Cufflinks | exon | 94201450 | 94202496 | . | - | . | gene_id | "XLOC_040034"; | transcript_id | "Novel_000548"; | exon_number | "4"; | gene_type | " |
| At_chr12 | Cufflinks | exon | 94202547 | 94202728 | . | - | . | gene_id | "XLOC_040034"; | transcript_id | "Novel_000549"; | exon_number | "1"; | gene_type | " |
| At_chr12 | Cufflinks | exon | 94203725 | 94203877 | . | - | . | gene_id | "XLOC_040034"; | transcript_id | "Novel_000549"; | exon_number | "2"; | gene_type | " |
| At_chr12 | Cufflinks | exon | 94204478 | 94204740 | . | - | . | gene_id | "XLOC_040034"; | transcript_id | "Novel_000549"; | exon_number | "3"; | gene_type | " |
| At_chr13 | Cufflinks | exon | 11179021 | 11179289 | . | + | . | gene_id | "XLOC_040854"; | transcript_id | "Novel_000550"; | exon_number | "1"; | gene_type | " |
| At_chr13 | Cufflinks | exon | 11180220 | 11180268 | . | + | . | gene_id | "XLOC_040854"; | transcript_id | "Novel_000550"; | exon_number | "2"; | gene_type | " |
| At_chr13 | Cufflinks | exon | 17126813 | 17127314 | . | + | . | gene_id | "XLOC_041282"; | transcript_id | "Novel_000551"; | exon_number | "1"; | gene_type | " |
| At_chr13 | Cufflinks | exon | 17127680 | 17127829 | . | + | . | gene_id | "XLOC_041282"; | transcript_id | "Novel_000551"; | exon_number | "2"; | gene_type | " |
| At_chr13 | Cufflinks | exon | 17127906 | 17128029 | . | + | . | gene_id | "XLOC_041282"; | transcript_id | "Novel_000551"; | exon_number | "3"; | gene_type | " |
| At_chr13 | Cufflinks | exon | 17128145 | 17128245 | . | + | . | gene_id | "XLOC_041282"; | transcript_id | "Novel_000551"; | exon_number | "4"; | gene_type | " |
| At_chr13 | Cufflinks | exon | 17130839 | 17130931 | . | + | . | gene_id | "XLOC_041282"; | transcript_id | "Novel_000551"; | exon_number | "5"; | gene_type | " |
| At_chr13 | Cufflinks | exon | 17131022 | 17131488 | . | + | . | gene_id | "XLOC_041282"; | transcript_id | "Novel_000551"; | exon_number | "6"; | gene_type | " |
| At_chr13 | Cufflinks | exon | 19285671 | 19285853 | . | + | . | gene_id | "XLOC_041455"; | transcript_id | "Novel_000552"; | exon_number | "1"; | gene_type | " |
| At_chr13 | Cufflinks | exon | 19286878 | 19286962 | . | + | . | gene_id | "XLOC_041455"; | transcript_id | "Novel_000552"; | exon_number | "2"; | gene_type | " |
| At_chr13 | Cufflinks | exon | 19287302 | 19288639 | . | + | . | gene_id | "XLOC_041455"; | transcript_id | "Novel_000552"; | exon_number | "3"; | gene_type | " |

|          |           |      |          |          |   |   |   |         |                |               |                 |             |      |           |   |
|----------|-----------|------|----------|----------|---|---|---|---------|----------------|---------------|-----------------|-------------|------|-----------|---|
| At_chr13 | Cufflinks | exon | 19285676 | 19285853 | . | + | . | gene_id | "XLOC_041455"; | transcript_id | "Novel_000553"; | exon_number | "1"; | gene_type | " |
| At_chr13 | Cufflinks | exon | 19286878 | 19287045 | . | + | . | gene_id | "XLOC_041455"; | transcript_id | "Novel_000553"; | exon_number | "2"; | gene_type | " |
| At_chr13 | Cufflinks | exon | 19631660 | 19632004 | . | + | . | gene_id | "XLOC_041471"; | transcript_id | "Novel_000554"; | exon_number | "1"; | gene_type | " |
| At_chr13 | Cufflinks | exon | 19632103 | 19632170 | . | + | . | gene_id | "XLOC_041471"; | transcript_id | "Novel_000554"; | exon_number | "2"; | gene_type | " |
| At_chr13 | Cufflinks | exon | 19632254 | 19632305 | . | + | . | gene_id | "XLOC_041471"; | transcript_id | "Novel_000554"; | exon_number | "3"; | gene_type | " |
| At_chr13 | Cufflinks | exon | 19632752 | 19635960 | . | + | . | gene_id | "XLOC_041471"; | transcript_id | "Novel_000554"; | exon_number | "4"; | gene_type | " |
| At_chr13 | Cufflinks | exon | 22932537 | 22932787 | . | + | . | gene_id | "XLOC_041776"; | transcript_id | "Novel_000555"; | exon_number | "1"; | gene_type | " |
| At_chr13 | Cufflinks | exon | 22933524 | 22933745 | . | + | . | gene_id | "XLOC_041776"; | transcript_id | "Novel_000555"; | exon_number | "2"; | gene_type | " |
| At_chr13 | Cufflinks | exon | 22933926 | 22934000 | . | + | . | gene_id | "XLOC_041776"; | transcript_id | "Novel_000555"; | exon_number | "3"; | gene_type | " |
| At_chr13 | Cufflinks | exon | 22934115 | 22934689 | . | + | . | gene_id | "XLOC_041776"; | transcript_id | "Novel_000555"; | exon_number | "4"; | gene_type | " |
| At_chr13 | Cufflinks | exon | 22942783 | 22942815 | . | + | . | gene_id | "XLOC_041776"; | transcript_id | "Novel_000556"; | exon_number | "1"; | gene_type | " |
| At_chr13 | Cufflinks | exon | 22943006 | 22943098 | . | + | . | gene_id | "XLOC_041776"; | transcript_id | "Novel_000556"; | exon_number | "2"; | gene_type | " |
| At_chr13 | Cufflinks | exon | 22943433 | 22943487 | . | + | . | gene_id | "XLOC_041776"; | transcript_id | "Novel_000556"; | exon_number | "3"; | gene_type | " |
| At_chr13 | Cufflinks | exon | 22944049 | 22944125 | . | + | . | gene_id | "XLOC_041776"; | transcript_id | "Novel_000556"; | exon_number | "4"; | gene_type | " |
| At_chr13 | Cufflinks | exon | 22944212 | 22944283 | . | + | . | gene_id | "XLOC_041776"; | transcript_id | "Novel_000556"; | exon_number | "5"; | gene_type | " |
| At_chr13 | Cufflinks | exon | 22943031 | 22943098 | . | + | . | gene_id | "XLOC_041776"; | transcript_id | "Novel_000557"; | exon_number | "1"; | gene_type | " |
| At_chr13 | Cufflinks | exon | 22943433 | 22943487 | . | + | . | gene_id | "XLOC_041776"; | transcript_id | "Novel_000557"; | exon_number | "2"; | gene_type | " |
| At_chr13 | Cufflinks | exon | 22944049 | 22944102 | . | + | . | gene_id | "XLOC_041776"; | transcript_id | "Novel_000557"; | exon_number | "3"; | gene_type | " |
| At_chr13 | Cufflinks | exon | 22944212 | 22944249 | . | + | . | gene_id | "XLOC_041776"; | transcript_id | "Novel_000557"; | exon_number | "4"; | gene_type | " |
| At_chr13 | Cufflinks | exon | 22944994 | 22945053 | . | + | . | gene_id | "XLOC_041784"; | transcript_id | "Novel_000558"; | exon_number | "1"; | gene_type | " |
| At_chr13 | Cufflinks | exon | 22945200 | 22945277 | . | + | . | gene_id | "XLOC_041784"; | transcript_id | "Novel_000558"; | exon_number | "2"; | gene_type | " |
| At_chr13 | Cufflinks | exon | 22945403 | 22945630 | . | + | . | gene_id | "XLOC_041784"; | transcript_id | "Novel_000558"; | exon_number | "3"; | gene_type | " |
| At_chr13 | Cufflinks | exon | 22950659 | 22950864 | . | + | . | gene_id | "XLOC_041784"; | transcript_id | "Novel_000559"; | exon_number | "1"; | gene_type | " |
| At_chr13 | Cufflinks | exon | 22951102 | 22951253 | . | + | . | gene_id | "XLOC_041784"; | transcript_id | "Novel_000559"; | exon_number | "2"; | gene_type | " |
| At_chr13 | Cufflinks | exon | 22951363 | 22951857 | . | + | . | gene_id | "XLOC_041784"; | transcript_id | "Novel_000559"; | exon_number | "3"; | gene_type | " |
| At_chr13 | Cufflinks | exon | 22951039 | 22951253 | . | + | . | gene_id | "XLOC_041784"; | transcript_id | "Novel_000560"; | exon_number | "1"; | gene_type | " |
| At_chr13 | Cufflinks | exon | 22951363 | 22951494 | . | + | . | gene_id | "XLOC_041784"; | transcript_id | "Novel_000560"; | exon_number | "2"; | gene_type | " |
| At_chr13 | Cufflinks | exon | 23025476 | 23025639 | . | + | . | gene_id | "XLOC_041797"; | transcript_id | "Novel_000561"; | exon_number | "1"; | gene_type | " |
| At_chr13 | Cufflinks | exon | 23026035 | 23026402 | . | + | . | gene_id | "XLOC_041797"; | transcript_id | "Novel_000561"; | exon_number | "2"; | gene_type | " |
| At_chr13 | Cufflinks | exon | 23027377 | 23027500 | . | + | . | gene_id | "XLOC_041797"; | transcript_id | "Novel_000561"; | exon_number | "3"; | gene_type | " |
| At_chr13 | Cufflinks | exon | 23028095 | 23029381 | . | + | . | gene_id | "XLOC_041797"; | transcript_id | "Novel_000561"; | exon_number | "4"; | gene_type | " |
| At_chr13 | Cufflinks | exon | 23025479 | 23025639 | . | + | . | gene_id | "XLOC_041797"; | transcript_id | "Novel_000562"; | exon_number | "1"; | gene_type | " |
| At_chr13 | Cufflinks | exon | 23026035 | 23027216 | . | + | . | gene_id | "XLOC_041797"; | transcript_id | "Novel_000562"; | exon_number | "2"; | gene_type | " |
| At_chr13 | Cufflinks | exon | 23025513 | 23025639 | . | + | . | gene_id | "XLOC_041797"; | transcript_id | "Novel_000563"; | exon_number | "1"; | gene_type | " |
| At_chr13 | Cufflinks | exon | 23026035 | 23026402 | . | + | . | gene_id | "XLOC_041797"; | transcript_id | "Novel_000563"; | exon_number | "2"; | gene_type | " |

|          |           |      |          |          |   |   |   |         |                |               |                 |             |      |           |   |
|----------|-----------|------|----------|----------|---|---|---|---------|----------------|---------------|-----------------|-------------|------|-----------|---|
| At_chr13 | Cufflinks | exon | 23027377 | 23027500 | . | + | . | gene_id | "XLOC_041797"; | transcript_id | "Novel_000563"; | exon_number | "3"; | gene_type | " |
| At_chr13 | Cufflinks | exon | 23028017 | 23028220 | . | + | . | gene_id | "XLOC_041797"; | transcript_id | "Novel_000563"; | exon_number | "4"; | gene_type | " |
| At_chr13 | Cufflinks | exon | 23029417 | 23029678 | . | + | . | gene_id | "XLOC_041797"; | transcript_id | "Novel_000563"; | exon_number | "5"; | gene_type | " |
| At_chr13 | Cufflinks | exon | 23027317 | 23027500 | . | + | . | gene_id | "XLOC_041797"; | transcript_id | "Novel_000564"; | exon_number | "1"; | gene_type | " |
| At_chr13 | Cufflinks | exon | 23028095 | 23028220 | . | + | . | gene_id | "XLOC_041797"; | transcript_id | "Novel_000564"; | exon_number | "2"; | gene_type | " |
| At_chr13 | Cufflinks | exon | 23029417 | 23029588 | . | + | . | gene_id | "XLOC_041797"; | transcript_id | "Novel_000564"; | exon_number | "3"; | gene_type | " |
| At_chr13 | Cufflinks | exon | 25595196 | 25595474 | . | + | . | gene_id | "XLOC_042162"; | transcript_id | "Novel_000565"; | exon_number | "1"; | gene_type | " |
| At_chr13 | Cufflinks | exon | 25595580 | 25599060 | . | + | . | gene_id | "XLOC_042162"; | transcript_id | "Novel_000565"; | exon_number | "2"; | gene_type | " |
| At_chr13 | Cufflinks | exon | 26053474 | 26053948 | . | + | . | gene_id | "XLOC_042221"; | transcript_id | "Novel_000566"; | exon_number | "1"; | gene_type | " |
| At_chr13 | Cufflinks | exon | 26054034 | 26054142 | . | + | . | gene_id | "XLOC_042221"; | transcript_id | "Novel_000566"; | exon_number | "2"; | gene_type | " |
| At_chr13 | Cufflinks | exon | 26054500 | 26054596 | . | + | . | gene_id | "XLOC_042221"; | transcript_id | "Novel_000566"; | exon_number | "3"; | gene_type | " |
| At_chr13 | Cufflinks | exon | 26225312 | 26225379 | . | + | . | gene_id | "XLOC_042237"; | transcript_id | "Novel_000567"; | exon_number | "1"; | gene_type | " |
| At_chr13 | Cufflinks | exon | 26225955 | 26226300 | . | + | . | gene_id | "XLOC_042237"; | transcript_id | "Novel_000567"; | exon_number | "2"; | gene_type | " |
| At_chr13 | Cufflinks | exon | 26226393 | 26228680 | . | + | . | gene_id | "XLOC_042237"; | transcript_id | "Novel_000567"; | exon_number | "3"; | gene_type | " |
| At_chr13 | Cufflinks | exon | 26225313 | 26225379 | . | + | . | gene_id | "XLOC_042237"; | transcript_id | "Novel_000568"; | exon_number | "1"; | gene_type | " |
| At_chr13 | Cufflinks | exon | 26225955 | 26226304 | . | + | . | gene_id | "XLOC_042237"; | transcript_id | "Novel_000568"; | exon_number | "2"; | gene_type | " |
| At_chr13 | Cufflinks | exon | 26226393 | 26229169 | . | + | . | gene_id | "XLOC_042237"; | transcript_id | "Novel_000568"; | exon_number | "3"; | gene_type | " |
| At_chr13 | Cufflinks | exon | 26225524 | 26225822 | . | + | . | gene_id | "XLOC_042237"; | transcript_id | "Novel_000569"; | exon_number | "1"; | gene_type | " |
| At_chr13 | Cufflinks | exon | 26225955 | 26226304 | . | + | . | gene_id | "XLOC_042237"; | transcript_id | "Novel_000569"; | exon_number | "2"; | gene_type | " |
| At_chr13 | Cufflinks | exon | 26226393 | 26228869 | . | + | . | gene_id | "XLOC_042237"; | transcript_id | "Novel_000569"; | exon_number | "3"; | gene_type | " |
| At_chr13 | Cufflinks | exon | 26540799 | 26541505 | . | + | . | gene_id | "XLOC_042256"; | transcript_id | "Novel_000570"; | exon_number | "1"; | gene_type | " |
| At_chr13 | Cufflinks | exon | 26541693 | 26541918 | . | + | . | gene_id | "XLOC_042256"; | transcript_id | "Novel_000570"; | exon_number | "2"; | gene_type | " |
| At_chr13 | Cufflinks | exon | 26565340 | 26565447 | . | + | . | gene_id | "XLOC_042257"; | transcript_id | "Novel_000571"; | exon_number | "1"; | gene_type | " |
| At_chr13 | Cufflinks | exon | 26566259 | 26566398 | . | + | . | gene_id | "XLOC_042257"; | transcript_id | "Novel_000571"; | exon_number | "2"; | gene_type | " |
| At_chr13 | Cufflinks | exon | 26566537 | 26566652 | . | + | . | gene_id | "XLOC_042257"; | transcript_id | "Novel_000571"; | exon_number | "3"; | gene_type | " |
| At_chr13 | Cufflinks | exon | 26566911 | 26569457 | . | + | . | gene_id | "XLOC_042257"; | transcript_id | "Novel_000571"; | exon_number | "4"; | gene_type | " |
| At_chr13 | Cufflinks | exon | 26565370 | 26565447 | . | + | . | gene_id | "XLOC_042257"; | transcript_id | "Novel_000572"; | exon_number | "1"; | gene_type | " |
| At_chr13 | Cufflinks | exon | 26566259 | 26566444 | . | + | . | gene_id | "XLOC_042257"; | transcript_id | "Novel_000572"; | exon_number | "2"; | gene_type | " |
| At_chr13 | Cufflinks | exon | 26566537 | 26566652 | . | + | . | gene_id | "XLOC_042257"; | transcript_id | "Novel_000572"; | exon_number | "3"; | gene_type | " |
| At_chr13 | Cufflinks | exon | 26566911 | 26566995 | . | + | . | gene_id | "XLOC_042257"; | transcript_id | "Novel_000572"; | exon_number | "4"; | gene_type | " |
| At_chr13 | Cufflinks | exon | 26569033 | 26569759 | . | + | . | gene_id | "XLOC_042257"; | transcript_id | "Novel_000572"; | exon_number | "5"; | gene_type | " |
| At_chr13 | Cufflinks | exon | 26565385 | 26565447 | . | + | . | gene_id | "XLOC_042257"; | transcript_id | "Novel_000573"; | exon_number | "1"; | gene_type | " |
| At_chr13 | Cufflinks | exon | 26565991 | 26566652 | . | + | . | gene_id | "XLOC_042257"; | transcript_id | "Novel_000573"; | exon_number | "2"; | gene_type | " |
| At_chr13 | Cufflinks | exon | 26566911 | 26569759 | . | + | . | gene_id | "XLOC_042257"; | transcript_id | "Novel_000573"; | exon_number | "3"; | gene_type | " |
| At_chr13 | Cufflinks | exon | 27454238 | 27454628 | . | + | . | gene_id | "XLOC_042295"; | transcript_id | "Novel_000574"; | exon_number | "1"; | gene_type | " |

|          |           |      |          |          |   |   |   |         |                |               |                 |             |      |           |   |
|----------|-----------|------|----------|----------|---|---|---|---------|----------------|---------------|-----------------|-------------|------|-----------|---|
| At_chr13 | Cufflinks | exon | 27455367 | 27455467 | . | + | . | gene_id | "XLOC_042295"; | transcript_id | "Novel_000574"; | exon_number | "2"; | gene_type | " |
| At_chr13 | Cufflinks | exon | 27456427 | 27457008 | . | + | . | gene_id | "XLOC_042295"; | transcript_id | "Novel_000574"; | exon_number | "3"; | gene_type | " |
| At_chr13 | Cufflinks | exon | 31763483 | 31763503 | . | + | . | gene_id | "XLOC_042469"; | transcript_id | "Novel_000575"; | exon_number | "1"; | gene_type | " |
| At_chr13 | Cufflinks | exon | 31763767 | 31763826 | . | + | . | gene_id | "XLOC_042469"; | transcript_id | "Novel_000575"; | exon_number | "2"; | gene_type | " |
| At_chr13 | Cufflinks | exon | 31764719 | 31764823 | . | + | . | gene_id | "XLOC_042469"; | transcript_id | "Novel_000575"; | exon_number | "3"; | gene_type | " |
| At_chr13 | Cufflinks | exon | 31765200 | 31765229 | . | + | . | gene_id | "XLOC_042469"; | transcript_id | "Novel_000575"; | exon_number | "4"; | gene_type | " |
| At_chr13 | Cufflinks | exon | 31765820 | 31765896 | . | + | . | gene_id | "XLOC_042469"; | transcript_id | "Novel_000575"; | exon_number | "5"; | gene_type | " |
| At_chr13 | Cufflinks | exon | 31766356 | 31766574 | . | + | . | gene_id | "XLOC_042469"; | transcript_id | "Novel_000575"; | exon_number | "6"; | gene_type | " |
| At_chr13 | Cufflinks | exon | 33283656 | 33283869 | . | + | . | gene_id | "XLOC_042540"; | transcript_id | "Novel_000576"; | exon_number | "1"; | gene_type | " |
| At_chr13 | Cufflinks | exon | 33306507 | 33306637 | . | + | . | gene_id | "XLOC_042542"; | transcript_id | "Novel_000577"; | exon_number | "1"; | gene_type | " |
| At_chr13 | Cufflinks | exon | 33309019 | 33309155 | . | + | . | gene_id | "XLOC_042542"; | transcript_id | "Novel_000577"; | exon_number | "2"; | gene_type | " |
| At_chr13 | Cufflinks | exon | 33309645 | 33310227 | . | + | . | gene_id | "XLOC_042542"; | transcript_id | "Novel_000577"; | exon_number | "3"; | gene_type | " |
| At_chr13 | Cufflinks | exon | 33310955 | 33311052 | . | + | . | gene_id | "XLOC_042542"; | transcript_id | "Novel_000577"; | exon_number | "4"; | gene_type | " |
| At_chr13 | Cufflinks | exon | 33311187 | 33311418 | . | + | . | gene_id | "XLOC_042542"; | transcript_id | "Novel_000577"; | exon_number | "5"; | gene_type | " |
| At_chr13 | Cufflinks | exon | 43528632 | 43528711 | . | + | . | gene_id | "XLOC_042943"; | transcript_id | "Novel_000578"; | exon_number | "1"; | gene_type | " |
| At_chr13 | Cufflinks | exon | 43528842 | 43528937 | . | + | . | gene_id | "XLOC_042943"; | transcript_id | "Novel_000578"; | exon_number | "2"; | gene_type | " |
| At_chr13 | Cufflinks | exon | 43530626 | 43532233 | . | + | . | gene_id | "XLOC_042943"; | transcript_id | "Novel_000578"; | exon_number | "3"; | gene_type | " |
| At_chr13 | Cufflinks | exon | 43532324 | 43533483 | . | + | . | gene_id | "XLOC_042943"; | transcript_id | "Novel_000578"; | exon_number | "4"; | gene_type | " |
| At_chr13 | Cufflinks | exon | 43528642 | 43528711 | . | + | . | gene_id | "XLOC_042943"; | transcript_id | "Novel_000579"; | exon_number | "1"; | gene_type | " |
| At_chr13 | Cufflinks | exon | 43528842 | 43528937 | . | + | . | gene_id | "XLOC_042943"; | transcript_id | "Novel_000579"; | exon_number | "2"; | gene_type | " |
| At_chr13 | Cufflinks | exon | 43530626 | 43531714 | . | + | . | gene_id | "XLOC_042943"; | transcript_id | "Novel_000579"; | exon_number | "3"; | gene_type | " |
| At_chr13 | Cufflinks | exon | 43531790 | 43533502 | . | + | . | gene_id | "XLOC_042943"; | transcript_id | "Novel_000579"; | exon_number | "4"; | gene_type | " |
| At_chr13 | Cufflinks | exon | 45086654 | 45087314 | . | + | . | gene_id | "XLOC_043022"; | transcript_id | "Novel_000580"; | exon_number | "1"; | gene_type | " |
| At_chr13 | Cufflinks | exon | 45087405 | 45088304 | . | + | . | gene_id | "XLOC_043022"; | transcript_id | "Novel_000580"; | exon_number | "2"; | gene_type | " |
| At_chr13 | Cufflinks | exon | 46462612 | 46462699 | . | + | . | gene_id | "XLOC_043060"; | transcript_id | "Novel_000581"; | exon_number | "1"; | gene_type | " |
| At_chr13 | Cufflinks | exon | 46463105 | 46463194 | . | + | . | gene_id | "XLOC_043060"; | transcript_id | "Novel_000581"; | exon_number | "2"; | gene_type | " |
| At_chr13 | Cufflinks | exon | 46463540 | 46463620 | . | + | . | gene_id | "XLOC_043060"; | transcript_id | "Novel_000581"; | exon_number | "3"; | gene_type | " |
| At_chr13 | Cufflinks | exon | 46464140 | 46464198 | . | + | . | gene_id | "XLOC_043060"; | transcript_id | "Novel_000581"; | exon_number | "4"; | gene_type | " |
| At_chr13 | Cufflinks | exon | 46464274 | 46464514 | . | + | . | gene_id | "XLOC_043060"; | transcript_id | "Novel_000581"; | exon_number | "5"; | gene_type | " |
| At_chr13 | Cufflinks | exon | 46465058 | 46465764 | . | + | . | gene_id | "XLOC_043060"; | transcript_id | "Novel_000581"; | exon_number | "6"; | gene_type | " |
| At_chr13 | Cufflinks | exon | 47340695 | 47340725 | . | + | . | gene_id | "XLOC_043082"; | transcript_id | "Novel_000582"; | exon_number | "1"; | gene_type | " |
| At_chr13 | Cufflinks | exon | 47340798 | 47340868 | . | + | . | gene_id | "XLOC_043082"; | transcript_id | "Novel_000582"; | exon_number | "2"; | gene_type | " |
| At_chr13 | Cufflinks | exon | 47340950 | 47341011 | . | + | . | gene_id | "XLOC_043082"; | transcript_id | "Novel_000582"; | exon_number | "3"; | gene_type | " |
| At_chr13 | Cufflinks | exon | 47342160 | 47342911 | . | + | . | gene_id | "XLOC_043082"; | transcript_id | "Novel_000582"; | exon_number | "4"; | gene_type | " |
| At_chr13 | Cufflinks | exon | 55557070 | 55557271 | . | + | . | gene_id | "XLOC_043355"; | transcript_id | "Novel_000583"; | exon_number | "1"; | gene_type | " |

|          |           |      |          |          |   |   |   |         |                |               |                 |             |       |           |   |
|----------|-----------|------|----------|----------|---|---|---|---------|----------------|---------------|-----------------|-------------|-------|-----------|---|
| At_chr13 | Cufflinks | exon | 55557450 | 55560666 | . | + | . | gene_id | "XLOC_043355"; | transcript_id | "Novel_000583"; | exon_number | "2";  | gene_type | " |
| At_chr13 | Cufflinks | exon | 66888632 | 66888805 | . | + | . | gene_id | "XLOC_043712"; | transcript_id | "Novel_000584"; | exon_number | "1";  | gene_type | " |
| At_chr13 | Cufflinks | exon | 66888893 | 66889246 | . | + | . | gene_id | "XLOC_043712"; | transcript_id | "Novel_000584"; | exon_number | "2";  | gene_type | " |
| At_chr13 | Cufflinks | exon | 76116168 | 76116493 | . | + | . | gene_id | "XLOC_044040"; | transcript_id | "Novel_000585"; | exon_number | "1";  | gene_type | " |
| At_chr13 | Cufflinks | exon | 76116567 | 76116718 | . | + | . | gene_id | "XLOC_044040"; | transcript_id | "Novel_000585"; | exon_number | "2";  | gene_type | " |
| At_chr13 | Cufflinks | exon | 76116802 | 76116956 | . | + | . | gene_id | "XLOC_044040"; | transcript_id | "Novel_000585"; | exon_number | "3";  | gene_type | " |
| At_chr13 | Cufflinks | exon | 76117057 | 76117139 | . | + | . | gene_id | "XLOC_044040"; | transcript_id | "Novel_000585"; | exon_number | "4";  | gene_type | " |
| At_chr13 | Cufflinks | exon | 76117270 | 76117314 | . | + | . | gene_id | "XLOC_044040"; | transcript_id | "Novel_000585"; | exon_number | "5";  | gene_type | " |
| At_chr13 | Cufflinks | exon | 76117423 | 76117572 | . | + | . | gene_id | "XLOC_044040"; | transcript_id | "Novel_000585"; | exon_number | "6";  | gene_type | " |
| At_chr13 | Cufflinks | exon | 76117657 | 76117935 | . | + | . | gene_id | "XLOC_044040"; | transcript_id | "Novel_000585"; | exon_number | "7";  | gene_type | " |
| At_chr13 | Cufflinks | exon | 76118017 | 76118150 | . | + | . | gene_id | "XLOC_044040"; | transcript_id | "Novel_000585"; | exon_number | "8";  | gene_type | " |
| At_chr13 | Cufflinks | exon | 76118282 | 76118437 | . | + | . | gene_id | "XLOC_044040"; | transcript_id | "Novel_000585"; | exon_number | "9";  | gene_type | " |
| At_chr13 | Cufflinks | exon | 76118824 | 76118903 | . | + | . | gene_id | "XLOC_044040"; | transcript_id | "Novel_000585"; | exon_number | "10"; | gene_type | " |
| At_chr13 | Cufflinks | exon | 76123474 | 76123839 | . | + | . | gene_id | "XLOC_044040"; | transcript_id | "Novel_000585"; | exon_number | "11"; | gene_type | " |
| At_chr13 | Cufflinks | exon | 77376662 | 77379288 | . | + | . | gene_id | "XLOC_044138"; | transcript_id | "Novel_000586"; | exon_number | "1";  | gene_type | " |
| At_chr13 | Cufflinks | exon | 77379921 | 77380448 | . | + | . | gene_id | "XLOC_044138"; | transcript_id | "Novel_000586"; | exon_number | "2";  | gene_type | " |
| At_chr13 | Cufflinks | exon | 79894870 | 79895086 | . | + | . | gene_id | "XLOC_044337"; | transcript_id | "Novel_000587"; | exon_number | "1";  | gene_type | " |
| At_chr13 | Cufflinks | exon | 79896271 | 79898504 | . | + | . | gene_id | "XLOC_044337"; | transcript_id | "Novel_000587"; | exon_number | "2";  | gene_type | " |
| At_chr13 | Cufflinks | exon | 80441941 | 80442426 | . | + | . | gene_id | "XLOC_044365"; | transcript_id | "Novel_000588"; | exon_number | "1";  | gene_type | " |
| At_chr13 | Cufflinks | exon | 80442515 | 80442567 | . | + | . | gene_id | "XLOC_044365"; | transcript_id | "Novel_000588"; | exon_number | "2";  | gene_type | " |
| At_chr13 | Cufflinks | exon | 80442937 | 80443211 | . | + | . | gene_id | "XLOC_044365"; | transcript_id | "Novel_000588"; | exon_number | "3";  | gene_type | " |
| At_chr13 | Cufflinks | exon | 80527213 | 80527766 | . | + | . | gene_id | "XLOC_044389"; | transcript_id | "Novel_000589"; | exon_number | "1";  | gene_type | " |
| At_chr13 | Cufflinks | exon | 83522383 | 83522652 | . | + | . | gene_id | "XLOC_044497"; | transcript_id | "Novel_000590"; | exon_number | "1";  | gene_type | " |
| At_chr13 | Cufflinks | exon | 90198628 | 90198978 | . | + | . | gene_id | "XLOC_044777"; | transcript_id | "Novel_000591"; | exon_number | "1";  | gene_type | " |
| At_chr13 | Cufflinks | exon | 90199076 | 90199170 | . | + | . | gene_id | "XLOC_044777"; | transcript_id | "Novel_000591"; | exon_number | "2";  | gene_type | " |
| At_chr13 | Cufflinks | exon | 90199594 | 90200018 | . | + | . | gene_id | "XLOC_044777"; | transcript_id | "Novel_000591"; | exon_number | "3";  | gene_type | " |
| At_chr13 | Cufflinks | exon | 90200494 | 90200851 | . | + | . | gene_id | "XLOC_044777"; | transcript_id | "Novel_000591"; | exon_number | "4";  | gene_type | " |
| At_chr13 | Cufflinks | exon | 90201406 | 90201519 | . | + | . | gene_id | "XLOC_044777"; | transcript_id | "Novel_000591"; | exon_number | "5";  | gene_type | " |
| At_chr13 | Cufflinks | exon | 90201694 | 90202275 | . | + | . | gene_id | "XLOC_044777"; | transcript_id | "Novel_000591"; | exon_number | "6";  | gene_type | " |
| At_chr13 | Cufflinks | exon | 90198628 | 90199170 | . | + | . | gene_id | "XLOC_044777"; | transcript_id | "Novel_000592"; | exon_number | "1";  | gene_type | " |
| At_chr13 | Cufflinks | exon | 90199594 | 90200018 | . | + | . | gene_id | "XLOC_044777"; | transcript_id | "Novel_000592"; | exon_number | "2";  | gene_type | " |
| At_chr13 | Cufflinks | exon | 90200494 | 90200851 | . | + | . | gene_id | "XLOC_044777"; | transcript_id | "Novel_000592"; | exon_number | "3";  | gene_type | " |
| At_chr13 | Cufflinks | exon | 90201406 | 90201519 | . | + | . | gene_id | "XLOC_044777"; | transcript_id | "Novel_000592"; | exon_number | "4";  | gene_type | " |
| At_chr13 | Cufflinks | exon | 90201694 | 90202275 | . | + | . | gene_id | "XLOC_044777"; | transcript_id | "Novel_000592"; | exon_number | "5";  | gene_type | " |
| At_chr13 | Cufflinks | exon | 90199287 | 90200018 | . | + | . | gene_id | "XLOC_044777"; | transcript_id | "Novel_000593"; | exon_number | "1";  | gene_type | " |

|          |           |      |          |          |   |   |   |         |                |               |                 |             |      |           |   |
|----------|-----------|------|----------|----------|---|---|---|---------|----------------|---------------|-----------------|-------------|------|-----------|---|
| At_chr13 | Cufflinks | exon | 90200494 | 90200851 | . | + | . | gene_id | "XLOC_044777"; | transcript_id | "Novel_000593"; | exon_number | "2"; | gene_type | " |
| At_chr13 | Cufflinks | exon | 90201406 | 90201519 | . | + | . | gene_id | "XLOC_044777"; | transcript_id | "Novel_000593"; | exon_number | "3"; | gene_type | " |
| At_chr13 | Cufflinks | exon | 90201694 | 90202275 | . | + | . | gene_id | "XLOC_044777"; | transcript_id | "Novel_000593"; | exon_number | "4"; | gene_type | " |
| At_chr13 | Cufflinks | exon | 90218060 | 90218274 | . | + | . | gene_id | "XLOC_044779"; | transcript_id | "Novel_000594"; | exon_number | "1"; | gene_type | " |
| At_chr13 | Cufflinks | exon | 90218514 | 90218540 | . | + | . | gene_id | "XLOC_044779"; | transcript_id | "Novel_000594"; | exon_number | "2"; | gene_type | " |
| At_chr13 | Cufflinks | exon | 90218671 | 90218716 | . | + | . | gene_id | "XLOC_044779"; | transcript_id | "Novel_000594"; | exon_number | "3"; | gene_type | " |
| At_chr13 | Cufflinks | exon | 90219188 | 90219590 | . | + | . | gene_id | "XLOC_044779"; | transcript_id | "Novel_000595"; | exon_number | "1"; | gene_type | " |
| At_chr13 | Cufflinks | exon | 90219697 | 90219777 | . | + | . | gene_id | "XLOC_044779"; | transcript_id | "Novel_000595"; | exon_number | "2"; | gene_type | " |
| At_chr13 | Cufflinks | exon | 90219887 | 90220032 | . | + | . | gene_id | "XLOC_044779"; | transcript_id | "Novel_000595"; | exon_number | "3"; | gene_type | " |
| At_chr13 | Cufflinks | exon | 90220427 | 90220801 | . | + | . | gene_id | "XLOC_044779"; | transcript_id | "Novel_000595"; | exon_number | "4"; | gene_type | " |
| At_chr13 | Cufflinks | exon | 90219446 | 90219777 | . | + | . | gene_id | "XLOC_044779"; | transcript_id | "Novel_000596"; | exon_number | "1"; | gene_type | " |
| At_chr13 | Cufflinks | exon | 90219887 | 90220032 | . | + | . | gene_id | "XLOC_044779"; | transcript_id | "Novel_000596"; | exon_number | "2"; | gene_type | " |
| At_chr13 | Cufflinks | exon | 90220427 | 90221096 | . | + | . | gene_id | "XLOC_044779"; | transcript_id | "Novel_000596"; | exon_number | "3"; | gene_type | " |
| At_chr13 | Cufflinks | exon | 90257960 | 90258351 | . | + | . | gene_id | "XLOC_044783"; | transcript_id | "Novel_000597"; | exon_number | "1"; | gene_type | " |
| At_chr13 | Cufflinks | exon | 90261088 | 90261714 | . | + | . | gene_id | "XLOC_044783"; | transcript_id | "Novel_000597"; | exon_number | "2"; | gene_type | " |
| At_chr13 | Cufflinks | exon | 90262286 | 90262462 | . | + | . | gene_id | "XLOC_044783"; | transcript_id | "Novel_000598"; | exon_number | "1"; | gene_type | " |
| At_chr13 | Cufflinks | exon | 90262559 | 90262616 | . | + | . | gene_id | "XLOC_044783"; | transcript_id | "Novel_000598"; | exon_number | "2"; | gene_type | " |
| At_chr13 | Cufflinks | exon | 90262902 | 90263219 | . | + | . | gene_id | "XLOC_044783"; | transcript_id | "Novel_000598"; | exon_number | "3"; | gene_type | " |
| At_chr13 | Cufflinks | exon | 90263530 | 90263731 | . | + | . | gene_id | "XLOC_044783"; | transcript_id | "Novel_000598"; | exon_number | "4"; | gene_type | " |
| At_chr13 | Cufflinks | exon | 90263811 | 90264411 | . | + | . | gene_id | "XLOC_044783"; | transcript_id | "Novel_000598"; | exon_number | "5"; | gene_type | " |
| At_chr13 | Cufflinks | exon | 90264510 | 90264585 | . | + | . | gene_id | "XLOC_044783"; | transcript_id | "Novel_000598"; | exon_number | "6"; | gene_type | " |
| At_chr13 | Cufflinks | exon | 90264783 | 90265962 | . | + | . | gene_id | "XLOC_044783"; | transcript_id | "Novel_000598"; | exon_number | "7"; | gene_type | " |
| At_chr13 | Cufflinks | exon | 90262396 | 90262462 | . | + | . | gene_id | "XLOC_044783"; | transcript_id | "Novel_000599"; | exon_number | "1"; | gene_type | " |
| At_chr13 | Cufflinks | exon | 90262559 | 90262616 | . | + | . | gene_id | "XLOC_044783"; | transcript_id | "Novel_000599"; | exon_number | "2"; | gene_type | " |
| At_chr13 | Cufflinks | exon | 90262902 | 90263222 | . | + | . | gene_id | "XLOC_044783"; | transcript_id | "Novel_000599"; | exon_number | "3"; | gene_type | " |
| At_chr13 | Cufflinks | exon | 90263284 | 90263731 | . | + | . | gene_id | "XLOC_044783"; | transcript_id | "Novel_000600"; | exon_number | "1"; | gene_type | " |
| At_chr13 | Cufflinks | exon | 90263811 | 90264131 | . | + | . | gene_id | "XLOC_044783"; | transcript_id | "Novel_000600"; | exon_number | "2"; | gene_type | " |
| At_chr13 | Cufflinks | exon | 90264220 | 90264411 | . | + | . | gene_id | "XLOC_044783"; | transcript_id | "Novel_000600"; | exon_number | "3"; | gene_type | " |
| At_chr13 | Cufflinks | exon | 90264510 | 90264585 | . | + | . | gene_id | "XLOC_044783"; | transcript_id | "Novel_000600"; | exon_number | "4"; | gene_type | " |
| At_chr13 | Cufflinks | exon | 90264783 | 90265349 | . | + | . | gene_id | "XLOC_044783"; | transcript_id | "Novel_000600"; | exon_number | "5"; | gene_type | " |
| At_chr13 | Cufflinks | exon | 90266449 | 90266909 | . | + | . | gene_id | "XLOC_044783"; | transcript_id | "Novel_000600"; | exon_number | "6"; | gene_type | " |
| At_chr13 | Cufflinks | exon | 90354637 | 90355035 | . | + | . | gene_id | "XLOC_044801"; | transcript_id | "Novel_000601"; | exon_number | "1"; | gene_type | " |
| At_chr13 | Cufflinks | exon | 90355134 | 90355231 | . | + | . | gene_id | "XLOC_044801"; | transcript_id | "Novel_000601"; | exon_number | "2"; | gene_type | " |
| At_chr13 | Cufflinks | exon | 90355335 | 90355380 | . | + | . | gene_id | "XLOC_044801"; | transcript_id | "Novel_000601"; | exon_number | "3"; | gene_type | " |
| At_chr13 | Cufflinks | exon | 90355799 | 90355948 | . | + | . | gene_id | "XLOC_044801"; | transcript_id | "Novel_000601"; | exon_number | "4"; | gene_type | " |

|          |           |      |          |          |   |   |   |         |                |               |                 |             |      |           |   |
|----------|-----------|------|----------|----------|---|---|---|---------|----------------|---------------|-----------------|-------------|------|-----------|---|
| At_chr13 | Cufflinks | exon | 90356076 | 90358027 | . | + | . | gene_id | "XLOC_044801"; | transcript_id | "Novel_000601"; | exon_number | "5"; | gene_type | " |
| At_chr13 | Cufflinks | exon | 90362854 | 90363069 | . | + | . | gene_id | "XLOC_044805"; | transcript_id | "Novel_000602"; | exon_number | "1"; | gene_type | " |
| At_chr13 | Cufflinks | exon | 90364420 | 90365164 | . | + | . | gene_id | "XLOC_044805"; | transcript_id | "Novel_000602"; | exon_number | "2"; | gene_type | " |
| At_chr13 | Cufflinks | exon | 90365820 | 90365895 | . | + | . | gene_id | "XLOC_044805"; | transcript_id | "Novel_000602"; | exon_number | "3"; | gene_type | " |
| At_chr13 | Cufflinks | exon | 90366021 | 90366147 | . | + | . | gene_id | "XLOC_044805"; | transcript_id | "Novel_000602"; | exon_number | "4"; | gene_type | " |
| At_chr13 | Cufflinks | exon | 90366891 | 90368214 | . | + | . | gene_id | "XLOC_044805"; | transcript_id | "Novel_000602"; | exon_number | "5"; | gene_type | " |
| At_chr13 | Cufflinks | exon | 90362915 | 90363069 | . | + | . | gene_id | "XLOC_044805"; | transcript_id | "Novel_000603"; | exon_number | "1"; | gene_type | " |
| At_chr13 | Cufflinks | exon | 90364420 | 90365895 | . | + | . | gene_id | "XLOC_044805"; | transcript_id | "Novel_000603"; | exon_number | "2"; | gene_type | " |
| At_chr13 | Cufflinks | exon | 90366021 | 90366147 | . | + | . | gene_id | "XLOC_044805"; | transcript_id | "Novel_000603"; | exon_number | "3"; | gene_type | " |
| At_chr13 | Cufflinks | exon | 90366891 | 90368185 | . | + | . | gene_id | "XLOC_044805"; | transcript_id | "Novel_000603"; | exon_number | "4"; | gene_type | " |
| At_chr13 | Cufflinks | exon | 90890056 | 90890112 | . | + | . | gene_id | "XLOC_044883"; | transcript_id | "Novel_000604"; | exon_number | "1"; | gene_type | " |
| At_chr13 | Cufflinks | exon | 90890353 | 90890411 | . | + | . | gene_id | "XLOC_044883"; | transcript_id | "Novel_000604"; | exon_number | "2"; | gene_type | " |
| At_chr13 | Cufflinks | exon | 90891325 | 90893414 | . | + | . | gene_id | "XLOC_044883"; | transcript_id | "Novel_000604"; | exon_number | "3"; | gene_type | " |
| At_chr13 | Cufflinks | exon | 90890058 | 90890112 | . | + | . | gene_id | "XLOC_044883"; | transcript_id | "Novel_000605"; | exon_number | "1"; | gene_type | " |
| At_chr13 | Cufflinks | exon | 90890353 | 90890411 | . | + | . | gene_id | "XLOC_044883"; | transcript_id | "Novel_000605"; | exon_number | "2"; | gene_type | " |
| At_chr13 | Cufflinks | exon | 90891282 | 90893460 | . | + | . | gene_id | "XLOC_044883"; | transcript_id | "Novel_000605"; | exon_number | "3"; | gene_type | " |
| At_chr13 | Cufflinks | exon | 90890083 | 90890112 | . | + | . | gene_id | "XLOC_044883"; | transcript_id | "Novel_000606"; | exon_number | "1"; | gene_type | " |
| At_chr13 | Cufflinks | exon | 90890336 | 90890411 | . | + | . | gene_id | "XLOC_044883"; | transcript_id | "Novel_000606"; | exon_number | "2"; | gene_type | " |
| At_chr13 | Cufflinks | exon | 90891282 | 90893287 | . | + | . | gene_id | "XLOC_044883"; | transcript_id | "Novel_000606"; | exon_number | "3"; | gene_type | " |
| At_chr13 | Cufflinks | exon | 91471618 | 91471862 | . | + | . | gene_id | "XLOC_044974"; | transcript_id | "Novel_000607"; | exon_number | "1"; | gene_type | " |
| At_chr13 | Cufflinks | exon | 7827183  | 7828189  | . | - | . | gene_id | "XLOC_045328"; | transcript_id | "Novel_000608"; | exon_number | "1"; | gene_type | " |
| At_chr13 | Cufflinks | exon | 7829056  | 7829160  | . | - | . | gene_id | "XLOC_045328"; | transcript_id | "Novel_000608"; | exon_number | "2"; | gene_type | " |
| At_chr13 | Cufflinks | exon | 7829349  | 7829411  | . | - | . | gene_id | "XLOC_045328"; | transcript_id | "Novel_000608"; | exon_number | "3"; | gene_type | " |
| At_chr13 | Cufflinks | exon | 7829686  | 7829753  | . | - | . | gene_id | "XLOC_045328"; | transcript_id | "Novel_000608"; | exon_number | "4"; | gene_type | " |
| At_chr13 | Cufflinks | exon | 7830063  | 7830141  | . | - | . | gene_id | "XLOC_045328"; | transcript_id | "Novel_000608"; | exon_number | "5"; | gene_type | " |
| At_chr13 | Cufflinks | exon | 7830254  | 7830628  | . | - | . | gene_id | "XLOC_045328"; | transcript_id | "Novel_000608"; | exon_number | "6"; | gene_type | " |
| At_chr13 | Cufflinks | exon | 7828121  | 7828189  | . | - | . | gene_id | "XLOC_045328"; | transcript_id | "Novel_000609"; | exon_number | "1"; | gene_type | " |
| At_chr13 | Cufflinks | exon | 7828433  | 7828505  | . | - | . | gene_id | "XLOC_045328"; | transcript_id | "Novel_000609"; | exon_number | "2"; | gene_type | " |
| At_chr13 | Cufflinks | exon | 7829056  | 7829160  | . | - | . | gene_id | "XLOC_045328"; | transcript_id | "Novel_000609"; | exon_number | "3"; | gene_type | " |
| At_chr13 | Cufflinks | exon | 7829349  | 7830141  | . | - | . | gene_id | "XLOC_045328"; | transcript_id | "Novel_000609"; | exon_number | "4"; | gene_type | " |
| At_chr13 | Cufflinks | exon | 7830254  | 7830927  | . | - | . | gene_id | "XLOC_045328"; | transcript_id | "Novel_000609"; | exon_number | "5"; | gene_type | " |
| At_chr13 | Cufflinks | exon | 9421074  | 9426332  | . | - | . | gene_id | "XLOC_045408"; | transcript_id | "Novel_000610"; | exon_number | "1"; | gene_type | " |
| At_chr13 | Cufflinks | exon | 9426430  | 9430955  | . | - | . | gene_id | "XLOC_045408"; | transcript_id | "Novel_000610"; | exon_number | "2"; | gene_type | " |
| At_chr13 | Cufflinks | exon | 9421116  | 9430698  | . | - | . | gene_id | "XLOC_045408"; | transcript_id | "Novel_000611"; | exon_number | "1"; | gene_type | " |
| At_chr13 | Cufflinks | exon | 9430801  | 9430964  | . | - | . | gene_id | "XLOC_045408"; | transcript_id | "Novel_000611"; | exon_number | "2"; | gene_type | " |



|          |           |      |          |          |   |   |   |         |                |               |                 |             |      |           |   |
|----------|-----------|------|----------|----------|---|---|---|---------|----------------|---------------|-----------------|-------------|------|-----------|---|
| At_chr13 | Cufflinks | exon | 11291618 | 11291733 | . | - | . | gene_id | "XLOC_045457"; | transcript_id | "Novel_000612"; | exon_number | "1"; | gene_type | " |
| At_chr13 | Cufflinks | exon | 11291881 | 11292030 | . | - | . | gene_id | "XLOC_045457"; | transcript_id | "Novel_000612"; | exon_number | "2"; | gene_type | " |
| At_chr13 | Cufflinks | exon | 13183346 | 13183799 | . | - | . | gene_id | "XLOC_045544"; | transcript_id | "Novel_000613"; | exon_number | "1"; | gene_type | " |
| At_chr13 | Cufflinks | exon | 13184510 | 13184693 | . | - | . | gene_id | "XLOC_045544"; | transcript_id | "Novel_000613"; | exon_number | "2"; | gene_type | " |
| At_chr13 | Cufflinks | exon | 13184780 | 13184870 | . | - | . | gene_id | "XLOC_045544"; | transcript_id | "Novel_000613"; | exon_number | "3"; | gene_type | " |
| At_chr13 | Cufflinks | exon | 13184983 | 13185117 | . | - | . | gene_id | "XLOC_045544"; | transcript_id | "Novel_000613"; | exon_number | "4"; | gene_type | " |
| At_chr13 | Cufflinks | exon | 13659703 | 13659892 | . | - | . | gene_id | "XLOC_045615"; | transcript_id | "Novel_000614"; | exon_number | "1"; | gene_type | " |
| At_chr13 | Cufflinks | exon | 13659993 | 13660048 | . | - | . | gene_id | "XLOC_045615"; | transcript_id | "Novel_000614"; | exon_number | "2"; | gene_type | " |
| At_chr13 | Cufflinks | exon | 15030139 | 15031518 | . | - | . | gene_id | "XLOC_045697"; | transcript_id | "Novel_000615"; | exon_number | "1"; | gene_type | " |
| At_chr13 | Cufflinks | exon | 15032082 | 15032144 | . | - | . | gene_id | "XLOC_045697"; | transcript_id | "Novel_000615"; | exon_number | "2"; | gene_type | " |
| At_chr13 | Cufflinks | exon | 15396718 | 15398369 | . | - | . | gene_id | "XLOC_045734"; | transcript_id | "Novel_000616"; | exon_number | "1"; | gene_type | " |
| At_chr13 | Cufflinks | exon | 15398669 | 15398971 | . | - | . | gene_id | "XLOC_045734"; | transcript_id | "Novel_000616"; | exon_number | "2"; | gene_type | " |
| At_chr13 | Cufflinks | exon | 16490927 | 16491429 | . | - | . | gene_id | "XLOC_045836"; | transcript_id | "Novel_000617"; | exon_number | "1"; | gene_type | " |
| At_chr13 | Cufflinks | exon | 16491742 | 16491807 | . | - | . | gene_id | "XLOC_045836"; | transcript_id | "Novel_000617"; | exon_number | "2"; | gene_type | " |
| At_chr13 | Cufflinks | exon | 16492483 | 16492568 | . | - | . | gene_id | "XLOC_045836"; | transcript_id | "Novel_000617"; | exon_number | "3"; | gene_type | " |
| At_chr13 | Cufflinks | exon | 16493100 | 16493134 | . | - | . | gene_id | "XLOC_045836"; | transcript_id | "Novel_000617"; | exon_number | "4"; | gene_type | " |
| At_chr13 | Cufflinks | exon | 16493236 | 16493319 | . | - | . | gene_id | "XLOC_045836"; | transcript_id | "Novel_000617"; | exon_number | "5"; | gene_type | " |
| At_chr13 | Cufflinks | exon | 16493409 | 16493477 | . | - | . | gene_id | "XLOC_045836"; | transcript_id | "Novel_000617"; | exon_number | "6"; | gene_type | " |
| At_chr13 | Cufflinks | exon | 16494061 | 16494098 | . | - | . | gene_id | "XLOC_045836"; | transcript_id | "Novel_000617"; | exon_number | "7"; | gene_type | " |
| At_chr13 | Cufflinks | exon | 16494592 | 16494708 | . | - | . | gene_id | "XLOC_045836"; | transcript_id | "Novel_000617"; | exon_number | "8"; | gene_type | " |
| At_chr13 | Cufflinks | exon | 17130140 | 17132456 | . | - | . | gene_id | "XLOC_045884"; | transcript_id | "Novel_000618"; | exon_number | "1"; | gene_type | " |
| At_chr13 | Cufflinks | exon | 17132579 | 17132851 | . | - | . | gene_id | "XLOC_045884"; | transcript_id | "Novel_000618"; | exon_number | "2"; | gene_type | " |
| At_chr13 | Cufflinks | exon | 19086127 | 19087411 | . | - | . | gene_id | "XLOC_046056"; | transcript_id | "Novel_000619"; | exon_number | "1"; | gene_type | " |
| At_chr13 | Cufflinks | exon | 19088429 | 19088494 | . | - | . | gene_id | "XLOC_046056"; | transcript_id | "Novel_000619"; | exon_number | "2"; | gene_type | " |
| At_chr13 | Cufflinks | exon | 19088617 | 19089069 | . | - | . | gene_id | "XLOC_046056"; | transcript_id | "Novel_000619"; | exon_number | "3"; | gene_type | " |
| At_chr13 | Cufflinks | exon | 20677822 | 20678280 | . | - | . | gene_id | "XLOC_046174"; | transcript_id | "Novel_000620"; | exon_number | "1"; | gene_type | " |
| At_chr13 | Cufflinks | exon | 20678402 | 20680608 | . | - | . | gene_id | "XLOC_046174"; | transcript_id | "Novel_000620"; | exon_number | "2"; | gene_type | " |
| At_chr13 | Cufflinks | exon | 21408451 | 21408652 | . | - | . | gene_id | "XLOC_046235"; | transcript_id | "Novel_000621"; | exon_number | "1"; | gene_type | " |
| At_chr13 | Cufflinks | exon | 22857986 | 22859332 | . | - | . | gene_id | "XLOC_046388"; | transcript_id | "Novel_000622"; | exon_number | "1"; | gene_type | " |
| At_chr13 | Cufflinks | exon | 22873420 | 22873525 | . | - | . | gene_id | "XLOC_046394"; | transcript_id | "Novel_000623"; | exon_number | "1"; | gene_type | " |
| At_chr13 | Cufflinks | exon | 22873806 | 22873863 | . | - | . | gene_id | "XLOC_046394"; | transcript_id | "Novel_000623"; | exon_number | "2"; | gene_type | " |
| At_chr13 | Cufflinks | exon | 22873967 | 22874076 | . | - | . | gene_id | "XLOC_046394"; | transcript_id | "Novel_000623"; | exon_number | "3"; | gene_type | " |
| At_chr13 | Cufflinks | exon | 22874166 | 22874457 | . | - | . | gene_id | "XLOC_046394"; | transcript_id | "Novel_000623"; | exon_number | "4"; | gene_type | " |
| At_chr13 | Cufflinks | exon | 22904368 | 22904757 | . | - | . | gene_id | "XLOC_046394"; | transcript_id | "Novel_000624"; | exon_number | "1"; | gene_type | " |
| At_chr13 | Cufflinks | exon | 22904979 | 22905059 | . | - | . | gene_id | "XLOC_046394"; | transcript_id | "Novel_000624"; | exon_number | "2"; | gene_type | " |

|          |           |      |          |          |   |   |   |         |                |               |                 |             |      |           |   |
|----------|-----------|------|----------|----------|---|---|---|---------|----------------|---------------|-----------------|-------------|------|-----------|---|
| At_chr13 | Cufflinks | exon | 22905155 | 22905709 | . | - | . | gene_id | "XLOC_046394"; | transcript_id | "Novel_000624"; | exon_number | "3"; | gene_type | " |
| At_chr13 | Cufflinks | exon | 22905811 | 22905862 | . | - | . | gene_id | "XLOC_046394"; | transcript_id | "Novel_000624"; | exon_number | "4"; | gene_type | " |
| At_chr13 | Cufflinks | exon | 22905957 | 22906435 | . | - | . | gene_id | "XLOC_046394"; | transcript_id | "Novel_000624"; | exon_number | "5"; | gene_type | " |
| At_chr13 | Cufflinks | exon | 22906784 | 22906841 | . | - | . | gene_id | "XLOC_046394"; | transcript_id | "Novel_000624"; | exon_number | "6"; | gene_type | " |
| At_chr13 | Cufflinks | exon | 22906955 | 22907063 | . | - | . | gene_id | "XLOC_046394"; | transcript_id | "Novel_000624"; | exon_number | "7"; | gene_type | " |
| At_chr13 | Cufflinks | exon | 22907156 | 22907592 | . | - | . | gene_id | "XLOC_046394"; | transcript_id | "Novel_000624"; | exon_number | "8"; | gene_type | " |
| At_chr13 | Cufflinks | exon | 23022094 | 23022803 | . | - | . | gene_id | "XLOC_046427"; | transcript_id | "Novel_000625"; | exon_number | "1"; | gene_type | " |
| At_chr13 | Cufflinks | exon | 23022883 | 23023168 | . | - | . | gene_id | "XLOC_046427"; | transcript_id | "Novel_000625"; | exon_number | "2"; | gene_type | " |
| At_chr13 | Cufflinks | exon | 23038084 | 23039496 | . | - | . | gene_id | "XLOC_046428"; | transcript_id | "Novel_000626"; | exon_number | "1"; | gene_type | " |
| At_chr13 | Cufflinks | exon | 23039631 | 23039721 | . | - | . | gene_id | "XLOC_046428"; | transcript_id | "Novel_000626"; | exon_number | "2"; | gene_type | " |
| At_chr13 | Cufflinks | exon | 23717851 | 23718363 | . | - | . | gene_id | "XLOC_046498"; | transcript_id | "Novel_000627"; | exon_number | "1"; | gene_type | " |
| At_chr13 | Cufflinks | exon | 23718558 | 23718713 | . | - | . | gene_id | "XLOC_046498"; | transcript_id | "Novel_000627"; | exon_number | "2"; | gene_type | " |
| At_chr13 | Cufflinks | exon | 23820794 | 23820905 | . | - | . | gene_id | "XLOC_046507"; | transcript_id | "Novel_000628"; | exon_number | "1"; | gene_type | " |
| At_chr13 | Cufflinks | exon | 23821240 | 23821480 | . | - | . | gene_id | "XLOC_046507"; | transcript_id | "Novel_000628"; | exon_number | "2"; | gene_type | " |
| At_chr13 | Cufflinks | exon | 25794035 | 25795589 | . | - | . | gene_id | "XLOC_046838"; | transcript_id | "Novel_000629"; | exon_number | "1"; | gene_type | " |
| At_chr13 | Cufflinks | exon | 25795812 | 25795925 | . | - | . | gene_id | "XLOC_046838"; | transcript_id | "Novel_000629"; | exon_number | "2"; | gene_type | " |
| At_chr13 | Cufflinks | exon | 25796030 | 25796264 | . | - | . | gene_id | "XLOC_046838"; | transcript_id | "Novel_000629"; | exon_number | "3"; | gene_type | " |
| At_chr13 | Cufflinks | exon | 25796846 | 25796934 | . | - | . | gene_id | "XLOC_046838"; | transcript_id | "Novel_000629"; | exon_number | "4"; | gene_type | " |
| At_chr13 | Cufflinks | exon | 25797037 | 25797168 | . | - | . | gene_id | "XLOC_046838"; | transcript_id | "Novel_000629"; | exon_number | "5"; | gene_type | " |
| At_chr13 | Cufflinks | exon | 25797386 | 25797454 | . | - | . | gene_id | "XLOC_046838"; | transcript_id | "Novel_000629"; | exon_number | "6"; | gene_type | " |
| At_chr13 | Cufflinks | exon | 25794036 | 25795589 | . | - | . | gene_id | "XLOC_046838"; | transcript_id | "Novel_000630"; | exon_number | "1"; | gene_type | " |
| At_chr13 | Cufflinks | exon | 25795812 | 25795925 | . | - | . | gene_id | "XLOC_046838"; | transcript_id | "Novel_000630"; | exon_number | "2"; | gene_type | " |
| At_chr13 | Cufflinks | exon | 25796030 | 25796264 | . | - | . | gene_id | "XLOC_046838"; | transcript_id | "Novel_000630"; | exon_number | "3"; | gene_type | " |
| At_chr13 | Cufflinks | exon | 25796846 | 25797168 | . | - | . | gene_id | "XLOC_046838"; | transcript_id | "Novel_000630"; | exon_number | "4"; | gene_type | " |
| At_chr13 | Cufflinks | exon | 25797386 | 25797444 | . | - | . | gene_id | "XLOC_046838"; | transcript_id | "Novel_000630"; | exon_number | "5"; | gene_type | " |
| At_chr13 | Cufflinks | exon | 26426813 | 26426873 | . | - | . | gene_id | "XLOC_046898"; | transcript_id | "Novel_000631"; | exon_number | "1"; | gene_type | " |
| At_chr13 | Cufflinks | exon | 26426961 | 26427035 | . | - | . | gene_id | "XLOC_046898"; | transcript_id | "Novel_000631"; | exon_number | "2"; | gene_type | " |
| At_chr13 | Cufflinks | exon | 26427130 | 26427576 | . | - | . | gene_id | "XLOC_046898"; | transcript_id | "Novel_000631"; | exon_number | "3"; | gene_type | " |
| At_chr13 | Cufflinks | exon | 26427482 | 26427861 | . | - | . | gene_id | "XLOC_046898"; | transcript_id | "Novel_000632"; | exon_number | "1"; | gene_type | " |
| At_chr13 | Cufflinks | exon | 26428508 | 26428667 | . | - | . | gene_id | "XLOC_046898"; | transcript_id | "Novel_000632"; | exon_number | "2"; | gene_type | " |
| At_chr13 | Cufflinks | exon | 26518021 | 26518680 | . | - | . | gene_id | "XLOC_046930"; | transcript_id | "Novel_000633"; | exon_number | "1"; | gene_type | " |
| At_chr13 | Cufflinks | exon | 26518778 | 26518878 | . | - | . | gene_id | "XLOC_046930"; | transcript_id | "Novel_000633"; | exon_number | "2"; | gene_type | " |
| At_chr13 | Cufflinks | exon | 26519020 | 26519119 | . | - | . | gene_id | "XLOC_046930"; | transcript_id | "Novel_000633"; | exon_number | "3"; | gene_type | " |
| At_chr13 | Cufflinks | exon | 26519406 | 26519493 | . | - | . | gene_id | "XLOC_046930"; | transcript_id | "Novel_000633"; | exon_number | "4"; | gene_type | " |
| At_chr13 | Cufflinks | exon | 26519573 | 26519614 | . | - | . | gene_id | "XLOC_046930"; | transcript_id | "Novel_000633"; | exon_number | "5"; | gene_type | " |





|          |           |      |          |          |   |   |         |                |               |                 |             |      |           |   |
|----------|-----------|------|----------|----------|---|---|---------|----------------|---------------|-----------------|-------------|------|-----------|---|
| At_chr13 | Cufflinks | exon | 27661165 | 27661314 | . | . | gene_id | "XLOC_047023"; | transcript_id | "Novel_000646"; | exon_number | "3"; | gene_type | " |
| At_chr13 | Cufflinks | exon | 27661803 | 27662041 | . | . | gene_id | "XLOC_047023"; | transcript_id | "Novel_000646"; | exon_number | "4"; | gene_type | " |
| At_chr13 | Cufflinks | exon | 27662121 | 27662212 | . | . | gene_id | "XLOC_047023"; | transcript_id | "Novel_000646"; | exon_number | "5"; | gene_type | " |
| At_chr13 | Cufflinks | exon | 27661043 | 27661314 | . | . | gene_id | "XLOC_047023"; | transcript_id | "Novel_000647"; | exon_number | "1"; | gene_type | " |
| At_chr13 | Cufflinks | exon | 27661803 | 27662041 | . | . | gene_id | "XLOC_047023"; | transcript_id | "Novel_000647"; | exon_number | "2"; | gene_type | " |
| At_chr13 | Cufflinks | exon | 27662121 | 27662264 | . | . | gene_id | "XLOC_047023"; | transcript_id | "Novel_000647"; | exon_number | "3"; | gene_type | " |
| At_chr13 | Cufflinks | exon | 27696354 | 27697225 | . | . | gene_id | "XLOC_047024"; | transcript_id | "Novel_000648"; | exon_number | "1"; | gene_type | " |
| At_chr13 | Cufflinks | exon | 27700673 | 27700754 | . | . | gene_id | "XLOC_047024"; | transcript_id | "Novel_000648"; | exon_number | "2"; | gene_type | " |
| At_chr13 | Cufflinks | exon | 27700840 | 27700937 | . | . | gene_id | "XLOC_047024"; | transcript_id | "Novel_000648"; | exon_number | "3"; | gene_type | " |
| At_chr13 | Cufflinks | exon | 27701045 | 27701125 | . | . | gene_id | "XLOC_047024"; | transcript_id | "Novel_000648"; | exon_number | "4"; | gene_type | " |
| At_chr13 | Cufflinks | exon | 27701230 | 27701321 | . | . | gene_id | "XLOC_047024"; | transcript_id | "Novel_000648"; | exon_number | "5"; | gene_type | " |
| At_chr13 | Cufflinks | exon | 27702531 | 27702581 | . | . | gene_id | "XLOC_047024"; | transcript_id | "Novel_000648"; | exon_number | "6"; | gene_type | " |
| At_chr13 | Cufflinks | exon | 27702808 | 27702877 | . | . | gene_id | "XLOC_047024"; | transcript_id | "Novel_000648"; | exon_number | "7"; | gene_type | " |
| At_chr13 | Cufflinks | exon | 27696591 | 27697225 | . | . | gene_id | "XLOC_047024"; | transcript_id | "Novel_000649"; | exon_number | "1"; | gene_type | " |
| At_chr13 | Cufflinks | exon | 27700673 | 27700754 | . | . | gene_id | "XLOC_047024"; | transcript_id | "Novel_000649"; | exon_number | "2"; | gene_type | " |
| At_chr13 | Cufflinks | exon | 27700840 | 27700937 | . | . | gene_id | "XLOC_047024"; | transcript_id | "Novel_000649"; | exon_number | "3"; | gene_type | " |
| At_chr13 | Cufflinks | exon | 27701045 | 27701125 | . | . | gene_id | "XLOC_047024"; | transcript_id | "Novel_000649"; | exon_number | "4"; | gene_type | " |
| At_chr13 | Cufflinks | exon | 27701230 | 27701321 | . | . | gene_id | "XLOC_047024"; | transcript_id | "Novel_000649"; | exon_number | "5"; | gene_type | " |
| At_chr13 | Cufflinks | exon | 27702531 | 27702587 | . | . | gene_id | "XLOC_047024"; | transcript_id | "Novel_000649"; | exon_number | "6"; | gene_type | " |
| At_chr13 | Cufflinks | exon | 27702808 | 27702822 | . | . | gene_id | "XLOC_047024"; | transcript_id | "Novel_000649"; | exon_number | "7"; | gene_type | " |
| At_chr13 | Cufflinks | exon | 31576780 | 31578573 | . | . | gene_id | "XLOC_047149"; | transcript_id | "Novel_000650"; | exon_number | "1"; | gene_type | " |
| At_chr13 | Cufflinks | exon | 31578660 | 31580475 | . | . | gene_id | "XLOC_047149"; | transcript_id | "Novel_000650"; | exon_number | "2"; | gene_type | " |
| At_chr13 | Cufflinks | exon | 31577136 | 31577604 | . | . | gene_id | "XLOC_047149"; | transcript_id | "Novel_000651"; | exon_number | "1"; | gene_type | " |
| At_chr13 | Cufflinks | exon | 31578119 | 31578175 | . | . | gene_id | "XLOC_047149"; | transcript_id | "Novel_000651"; | exon_number | "2"; | gene_type | " |
| At_chr13 | Cufflinks | exon | 31578660 | 31580491 | . | . | gene_id | "XLOC_047149"; | transcript_id | "Novel_000651"; | exon_number | "3"; | gene_type | " |
| At_chr13 | Cufflinks | exon | 31577161 | 31577604 | . | . | gene_id | "XLOC_047149"; | transcript_id | "Novel_000652"; | exon_number | "1"; | gene_type | " |
| At_chr13 | Cufflinks | exon | 31578119 | 31578573 | . | . | gene_id | "XLOC_047149"; | transcript_id | "Novel_000652"; | exon_number | "2"; | gene_type | " |
| At_chr13 | Cufflinks | exon | 31578660 | 31580503 | . | . | gene_id | "XLOC_047149"; | transcript_id | "Novel_000652"; | exon_number | "3"; | gene_type | " |
| At_chr13 | Cufflinks | exon | 32953141 | 32953332 | . | . | gene_id | "XLOC_047205"; | transcript_id | "Novel_000653"; | exon_number | "1"; | gene_type | " |
| At_chr13 | Cufflinks | exon | 32953731 | 32955102 | . | . | gene_id | "XLOC_047205"; | transcript_id | "Novel_000653"; | exon_number | "2"; | gene_type | " |
| At_chr13 | Cufflinks | exon | 32956263 | 32956544 | . | . | gene_id | "XLOC_047205"; | transcript_id | "Novel_000653"; | exon_number | "3"; | gene_type | " |
| At_chr13 | Cufflinks | exon | 45601294 | 45601496 | . | . | gene_id | "XLOC_047787"; | transcript_id | "Novel_000654"; | exon_number | "1"; | gene_type | " |
| At_chr13 | Cufflinks | exon | 47760157 | 47760555 | . | . | gene_id | "XLOC_047864"; | transcript_id | "Novel_000655"; | exon_number | "1"; | gene_type | " |
| At_chr13 | Cufflinks | exon | 47760677 | 47760771 | . | . | gene_id | "XLOC_047864"; | transcript_id | "Novel_000655"; | exon_number | "2"; | gene_type | " |
| At_chr13 | Cufflinks | exon | 55359332 | 55359372 | . | . | gene_id | "XLOC_048089"; | transcript_id | "Novel_000656"; | exon_number | "1"; | gene_type | " |

|          |           |      |          |          |   |   |   |         |                |               |                 |             |      |           |   |
|----------|-----------|------|----------|----------|---|---|---|---------|----------------|---------------|-----------------|-------------|------|-----------|---|
| At_chr13 | Cufflinks | exon | 55359467 | 55360184 | . | - | . | gene_id | "XLOC_048089"; | transcript_id | "Novel_000656"; | exon_number | "2"; | gene_type | " |
| At_chr13 | Cufflinks | exon | 55524187 | 55524625 | . | - | . | gene_id | "XLOC_048110"; | transcript_id | "Novel_000657"; | exon_number | "1"; | gene_type | " |
| At_chr13 | Cufflinks | exon | 55524974 | 55525226 | . | - | . | gene_id | "XLOC_048110"; | transcript_id | "Novel_000657"; | exon_number | "2"; | gene_type | " |
| At_chr13 | Cufflinks | exon | 55525302 | 55525544 | . | - | . | gene_id | "XLOC_048110"; | transcript_id | "Novel_000657"; | exon_number | "3"; | gene_type | " |
| At_chr13 | Cufflinks | exon | 55525645 | 55525775 | . | - | . | gene_id | "XLOC_048110"; | transcript_id | "Novel_000657"; | exon_number | "4"; | gene_type | " |
| At_chr13 | Cufflinks | exon | 55525851 | 55526029 | . | - | . | gene_id | "XLOC_048110"; | transcript_id | "Novel_000657"; | exon_number | "5"; | gene_type | " |
| At_chr13 | Cufflinks | exon | 76573951 | 76575120 | . | - | . | gene_id | "XLOC_048805"; | transcript_id | "Novel_000658"; | exon_number | "1"; | gene_type | " |
| At_chr13 | Cufflinks | exon | 76575241 | 76575336 | . | - | . | gene_id | "XLOC_048805"; | transcript_id | "Novel_000658"; | exon_number | "2"; | gene_type | " |
| At_chr13 | Cufflinks | exon | 76575431 | 76575466 | . | - | . | gene_id | "XLOC_048805"; | transcript_id | "Novel_000658"; | exon_number | "3"; | gene_type | " |
| At_chr13 | Cufflinks | exon | 76576602 | 76576811 | . | - | . | gene_id | "XLOC_048805"; | transcript_id | "Novel_000658"; | exon_number | "4"; | gene_type | " |
| At_chr13 | Cufflinks | exon | 78104636 | 78105135 | . | - | . | gene_id | "XLOC_048941"; | transcript_id | "Novel_000659"; | exon_number | "1"; | gene_type | " |
| At_chr13 | Cufflinks | exon | 78105208 | 78105441 | . | - | . | gene_id | "XLOC_048941"; | transcript_id | "Novel_000659"; | exon_number | "2"; | gene_type | " |
| At_chr13 | Cufflinks | exon | 78133266 | 78133384 | . | - | . | gene_id | "XLOC_048952"; | transcript_id | "Novel_000660"; | exon_number | "1"; | gene_type | " |
| At_chr13 | Cufflinks | exon | 78133456 | 78133743 | . | - | . | gene_id | "XLOC_048952"; | transcript_id | "Novel_000660"; | exon_number | "2"; | gene_type | " |
| At_chr13 | Cufflinks | exon | 84457359 | 84457570 | . | - | . | gene_id | "XLOC_049283"; | transcript_id | "Novel_000661"; | exon_number | "1"; | gene_type | " |
| At_chr13 | Cufflinks | exon | 85959284 | 85959869 | . | - | . | gene_id | "XLOC_049399"; | transcript_id | "Novel_000662"; | exon_number | "1"; | gene_type | " |
| At_chr13 | Cufflinks | exon | 85963597 | 85963662 | . | - | . | gene_id | "XLOC_049399"; | transcript_id | "Novel_000662"; | exon_number | "2"; | gene_type | " |
| At_chr13 | Cufflinks | exon | 85963753 | 85964216 | . | - | . | gene_id | "XLOC_049399"; | transcript_id | "Novel_000662"; | exon_number | "3"; | gene_type | " |
| At_chr13 | Cufflinks | exon | 90224435 | 90224818 | . | - | . | gene_id | "XLOC_049552"; | transcript_id | "Novel_000663"; | exon_number | "1"; | gene_type | " |
| At_chr13 | Cufflinks | exon | 90225607 | 90225766 | . | - | . | gene_id | "XLOC_049552"; | transcript_id | "Novel_000663"; | exon_number | "2"; | gene_type | " |
| At_chr13 | Cufflinks | exon | 90225849 | 90225970 | . | - | . | gene_id | "XLOC_049552"; | transcript_id | "Novel_000663"; | exon_number | "3"; | gene_type | " |
| At_chr13 | Cufflinks | exon | 90226393 | 90226514 | . | - | . | gene_id | "XLOC_049552"; | transcript_id | "Novel_000663"; | exon_number | "4"; | gene_type | " |
| At_chr13 | Cufflinks | exon | 90226611 | 90226731 | . | - | . | gene_id | "XLOC_049552"; | transcript_id | "Novel_000663"; | exon_number | "5"; | gene_type | " |
| At_chr13 | Cufflinks | exon | 90226833 | 90226932 | . | - | . | gene_id | "XLOC_049552"; | transcript_id | "Novel_000663"; | exon_number | "6"; | gene_type | " |
| At_chr13 | Cufflinks | exon | 90227537 | 90227772 | . | - | . | gene_id | "XLOC_049552"; | transcript_id | "Novel_000663"; | exon_number | "7"; | gene_type | " |
| At_chr13 | Cufflinks | exon | 90225433 | 90225766 | . | - | . | gene_id | "XLOC_049552"; | transcript_id | "Novel_000664"; | exon_number | "1"; | gene_type | " |
| At_chr13 | Cufflinks | exon | 90225849 | 90225970 | . | - | . | gene_id | "XLOC_049552"; | transcript_id | "Novel_000664"; | exon_number | "2"; | gene_type | " |
| At_chr13 | Cufflinks | exon | 90226393 | 90226514 | . | - | . | gene_id | "XLOC_049552"; | transcript_id | "Novel_000664"; | exon_number | "3"; | gene_type | " |
| At_chr13 | Cufflinks | exon | 90226611 | 90226731 | . | - | . | gene_id | "XLOC_049552"; | transcript_id | "Novel_000664"; | exon_number | "4"; | gene_type | " |
| At_chr13 | Cufflinks | exon | 90226833 | 90226932 | . | - | . | gene_id | "XLOC_049552"; | transcript_id | "Novel_000664"; | exon_number | "5"; | gene_type | " |
| At_chr13 | Cufflinks | exon | 90227537 | 90227740 | . | - | . | gene_id | "XLOC_049552"; | transcript_id | "Novel_000664"; | exon_number | "6"; | gene_type | " |
| At_chr13 | Cufflinks | exon | 90311641 | 90311784 | . | - | . | gene_id | "XLOC_049566"; | transcript_id | "Novel_000665"; | exon_number | "1"; | gene_type | " |
| At_chr13 | Cufflinks | exon | 90312060 | 90312187 | . | - | . | gene_id | "XLOC_049566"; | transcript_id | "Novel_000665"; | exon_number | "2"; | gene_type | " |
| At_chr13 | Cufflinks | exon | 91079724 | 91080110 | . | - | . | gene_id | "XLOC_049680"; | transcript_id | "Novel_000666"; | exon_number | "1"; | gene_type | " |
| At_chr13 | Cufflinks | exon | 91080476 | 91080679 | . | - | . | gene_id | "XLOC_049680"; | transcript_id | "Novel_000666"; | exon_number | "2"; | gene_type | " |

|          |           |      |          |          |   |   |   |         |                |               |                 |             |      |           |   |
|----------|-----------|------|----------|----------|---|---|---|---------|----------------|---------------|-----------------|-------------|------|-----------|---|
| At_chr13 | Cufflinks | exon | 91080772 | 91080945 | . | - | . | gene_id | "XLOC_049680"; | transcript_id | "Novel_000666"; | exon_number | "3"; | gene_type | " |
| At_chr13 | Cufflinks | exon | 91081084 | 91081406 | . | - | . | gene_id | "XLOC_049680"; | transcript_id | "Novel_000666"; | exon_number | "4"; | gene_type | " |
| At_chr13 | Cufflinks | exon | 91081480 | 91082298 | . | - | . | gene_id | "XLOC_049680"; | transcript_id | "Novel_000666"; | exon_number | "5"; | gene_type | " |
| At_chr13 | Cufflinks | exon | 91082417 | 91082535 | . | - | . | gene_id | "XLOC_049680"; | transcript_id | "Novel_000666"; | exon_number | "6"; | gene_type | " |
| At_chr13 | Cufflinks | exon | 91083792 | 91084467 | . | - | . | gene_id | "XLOC_049680"; | transcript_id | "Novel_000666"; | exon_number | "7"; | gene_type | " |
| At_chr13 | Cufflinks | exon | 91079727 | 91080110 | . | - | . | gene_id | "XLOC_049680"; | transcript_id | "Novel_000667"; | exon_number | "1"; | gene_type | " |
| At_chr13 | Cufflinks | exon | 91080476 | 91080679 | . | - | . | gene_id | "XLOC_049680"; | transcript_id | "Novel_000667"; | exon_number | "2"; | gene_type | " |
| At_chr13 | Cufflinks | exon | 91080772 | 91080945 | . | - | . | gene_id | "XLOC_049680"; | transcript_id | "Novel_000667"; | exon_number | "3"; | gene_type | " |
| At_chr13 | Cufflinks | exon | 91081084 | 91081218 | . | - | . | gene_id | "XLOC_049680"; | transcript_id | "Novel_000667"; | exon_number | "4"; | gene_type | " |
| At_chr13 | Cufflinks | exon | 91081317 | 91081406 | . | - | . | gene_id | "XLOC_049680"; | transcript_id | "Novel_000667"; | exon_number | "5"; | gene_type | " |
| At_chr13 | Cufflinks | exon | 91081480 | 91081557 | . | - | . | gene_id | "XLOC_049680"; | transcript_id | "Novel_000667"; | exon_number | "6"; | gene_type | " |
| At_chr13 | Cufflinks | exon | 91081642 | 91082298 | . | - | . | gene_id | "XLOC_049680"; | transcript_id | "Novel_000667"; | exon_number | "7"; | gene_type | " |
| At_chr13 | Cufflinks | exon | 91082417 | 91082535 | . | - | . | gene_id | "XLOC_049680"; | transcript_id | "Novel_000667"; | exon_number | "8"; | gene_type | " |
| At_chr13 | Cufflinks | exon | 91083792 | 91084592 | . | - | . | gene_id | "XLOC_049680"; | transcript_id | "Novel_000667"; | exon_number | "9"; | gene_type | " |
| At_chr2  | Cufflinks | exon | 3237512  | 3238126  | . | + | . | gene_id | "XLOC_049962"; | transcript_id | "Novel_000668"; | exon_number | "1"; | gene_type | " |
| At_chr2  | Cufflinks | exon | 3238383  | 3238480  | . | + | . | gene_id | "XLOC_049962"; | transcript_id | "Novel_000668"; | exon_number | "2"; | gene_type | " |
| At_chr2  | Cufflinks | exon | 3238568  | 3238598  | . | + | . | gene_id | "XLOC_049962"; | transcript_id | "Novel_000668"; | exon_number | "3"; | gene_type | " |
| At_chr2  | Cufflinks | exon | 3238681  | 3238780  | . | + | . | gene_id | "XLOC_049962"; | transcript_id | "Novel_000668"; | exon_number | "4"; | gene_type | " |
| At_chr2  | Cufflinks | exon | 3238855  | 3238925  | . | + | . | gene_id | "XLOC_049962"; | transcript_id | "Novel_000668"; | exon_number | "5"; | gene_type | " |
| At_chr2  | Cufflinks | exon | 3239045  | 3239188  | . | + | . | gene_id | "XLOC_049962"; | transcript_id | "Novel_000668"; | exon_number | "6"; | gene_type | " |
| At_chr2  | Cufflinks | exon | 3239281  | 3239850  | . | + | . | gene_id | "XLOC_049962"; | transcript_id | "Novel_000668"; | exon_number | "7"; | gene_type | " |
| At_chr2  | Cufflinks | exon | 3238169  | 3238598  | . | + | . | gene_id | "XLOC_049962"; | transcript_id | "Novel_000669"; | exon_number | "1"; | gene_type | " |
| At_chr2  | Cufflinks | exon | 3238681  | 3238780  | . | + | . | gene_id | "XLOC_049962"; | transcript_id | "Novel_000669"; | exon_number | "2"; | gene_type | " |
| At_chr2  | Cufflinks | exon | 3238855  | 3238925  | . | + | . | gene_id | "XLOC_049962"; | transcript_id | "Novel_000669"; | exon_number | "3"; | gene_type | " |
| At_chr2  | Cufflinks | exon | 3239045  | 3239188  | . | + | . | gene_id | "XLOC_049962"; | transcript_id | "Novel_000669"; | exon_number | "4"; | gene_type | " |
| At_chr2  | Cufflinks | exon | 3239281  | 3239908  | . | + | . | gene_id | "XLOC_049962"; | transcript_id | "Novel_000669"; | exon_number | "5"; | gene_type | " |
| At_chr2  | Cufflinks | exon | 5137019  | 5137571  | . | + | . | gene_id | "XLOC_050094"; | transcript_id | "Novel_000670"; | exon_number | "1"; | gene_type | " |
| At_chr2  | Cufflinks | exon | 5137669  | 5138790  | . | + | . | gene_id | "XLOC_050094"; | transcript_id | "Novel_000670"; | exon_number | "2"; | gene_type | " |
| At_chr2  | Cufflinks | exon | 6887052  | 6888057  | . | + | . | gene_id | "XLOC_050259"; | transcript_id | "Novel_000671"; | exon_number | "1"; | gene_type | " |
| At_chr2  | Cufflinks | exon | 6888621  | 6888665  | . | + | . | gene_id | "XLOC_050259"; | transcript_id | "Novel_000671"; | exon_number | "2"; | gene_type | " |
| At_chr2  | Cufflinks | exon | 6888817  | 6888851  | . | + | . | gene_id | "XLOC_050259"; | transcript_id | "Novel_000671"; | exon_number | "3"; | gene_type | " |
| At_chr2  | Cufflinks | exon | 9503723  | 9504025  | . | + | . | gene_id | "XLOC_050540"; | transcript_id | "Novel_000672"; | exon_number | "1"; | gene_type | " |
| At_chr2  | Cufflinks | exon | 10994646 | 10994686 | . | + | . | gene_id | "XLOC_050666"; | transcript_id | "Novel_000673"; | exon_number | "1"; | gene_type | " |
| At_chr2  | Cufflinks | exon | 10995281 | 10996946 | . | + | . | gene_id | "XLOC_050666"; | transcript_id | "Novel_000673"; | exon_number | "2"; | gene_type | " |
| At_chr2  | Cufflinks | exon | 11028197 | 11028364 | . | + | . | gene_id | "XLOC_050671"; | transcript_id | "Novel_000674"; | exon_number | "1"; | gene_type | " |

|         |           |      |          |          |   |   |   |         |                |               |                 |             |      |           |   |
|---------|-----------|------|----------|----------|---|---|---|---------|----------------|---------------|-----------------|-------------|------|-----------|---|
| At_chr2 | Cufflinks | exon | 11029010 | 11031157 | . | + | . | gene_id | "XLOC_050671"; | transcript_id | "Novel_000674"; | exon_number | "2"; | gene_type | " |
| At_chr2 | Cufflinks | exon | 12495641 | 12496190 | . | + | . | gene_id | "XLOC_050825"; | transcript_id | "Novel_000675"; | exon_number | "1"; | gene_type | " |
| At_chr2 | Cufflinks | exon | 12496285 | 12496728 | . | + | . | gene_id | "XLOC_050825"; | transcript_id | "Novel_000675"; | exon_number | "2"; | gene_type | " |
| At_chr2 | Cufflinks | exon | 12496262 | 12496734 | . | + | . | gene_id | "XLOC_050825"; | transcript_id | "Novel_000676"; | exon_number | "1"; | gene_type | " |
| At_chr2 | Cufflinks | exon | 12496814 | 12497123 | . | + | . | gene_id | "XLOC_050825"; | transcript_id | "Novel_000676"; | exon_number | "2"; | gene_type | " |
| At_chr2 | Cufflinks | exon | 12497238 | 12497741 | . | + | . | gene_id | "XLOC_050825"; | transcript_id | "Novel_000676"; | exon_number | "3"; | gene_type | " |
| At_chr2 | Cufflinks | exon | 13031242 | 13031839 | . | + | . | gene_id | "XLOC_050898"; | transcript_id | "Novel_000677"; | exon_number | "1"; | gene_type | " |
| At_chr2 | Cufflinks | exon | 13032651 | 13032697 | . | + | . | gene_id | "XLOC_050898"; | transcript_id | "Novel_000677"; | exon_number | "2"; | gene_type | " |
| At_chr2 | Cufflinks | exon | 13032781 | 13034829 | . | + | . | gene_id | "XLOC_050898"; | transcript_id | "Novel_000677"; | exon_number | "3"; | gene_type | " |
| At_chr2 | Cufflinks | exon | 13031260 | 13031839 | . | + | . | gene_id | "XLOC_050898"; | transcript_id | "Novel_000678"; | exon_number | "1"; | gene_type | " |
| At_chr2 | Cufflinks | exon | 13032651 | 13034482 | . | + | . | gene_id | "XLOC_050898"; | transcript_id | "Novel_000678"; | exon_number | "2"; | gene_type | " |
| At_chr2 | Cufflinks | exon | 14088237 | 14088465 | . | + | . | gene_id | "XLOC_050974"; | transcript_id | "Novel_000679"; | exon_number | "1"; | gene_type | " |
| At_chr2 | Cufflinks | exon | 16350246 | 16350508 | . | + | . | gene_id | "XLOC_051117"; | transcript_id | "Novel_000680"; | exon_number | "1"; | gene_type | " |
| At_chr2 | Cufflinks | exon | 16350590 | 16350630 | . | + | . | gene_id | "XLOC_051117"; | transcript_id | "Novel_000680"; | exon_number | "2"; | gene_type | " |
| At_chr2 | Cufflinks | exon | 29716885 | 29717109 | . | + | . | gene_id | "XLOC_051751"; | transcript_id | "Novel_000681"; | exon_number | "1"; | gene_type | " |
| At_chr2 | Cufflinks | exon | 29717248 | 29717330 | . | + | . | gene_id | "XLOC_051751"; | transcript_id | "Novel_000681"; | exon_number | "2"; | gene_type | " |
| At_chr2 | Cufflinks | exon | 29717410 | 29717670 | . | + | . | gene_id | "XLOC_051751"; | transcript_id | "Novel_000681"; | exon_number | "3"; | gene_type | " |
| At_chr2 | Cufflinks | exon | 29717781 | 29718215 | . | + | . | gene_id | "XLOC_051751"; | transcript_id | "Novel_000681"; | exon_number | "4"; | gene_type | " |
| At_chr2 | Cufflinks | exon | 31802701 | 31802812 | . | + | . | gene_id | "XLOC_051873"; | transcript_id | "Novel_000682"; | exon_number | "1"; | gene_type | " |
| At_chr2 | Cufflinks | exon | 31802890 | 31802978 | . | + | . | gene_id | "XLOC_051873"; | transcript_id | "Novel_000682"; | exon_number | "2"; | gene_type | " |
| At_chr2 | Cufflinks | exon | 37068541 | 37068746 | . | + | . | gene_id | "XLOC_052140"; | transcript_id | "Novel_000683"; | exon_number | "1"; | gene_type | " |
| At_chr2 | Cufflinks | exon | 37070144 | 37072101 | . | + | . | gene_id | "XLOC_052140"; | transcript_id | "Novel_000683"; | exon_number | "2"; | gene_type | " |
| At_chr2 | Cufflinks | exon | 39090575 | 39090599 | . | + | . | gene_id | "XLOC_052197"; | transcript_id | "Novel_000684"; | exon_number | "1"; | gene_type | " |
| At_chr2 | Cufflinks | exon | 39090770 | 39090861 | . | + | . | gene_id | "XLOC_052197"; | transcript_id | "Novel_000684"; | exon_number | "2"; | gene_type | " |
| At_chr2 | Cufflinks | exon | 39091367 | 39091622 | . | + | . | gene_id | "XLOC_052197"; | transcript_id | "Novel_000684"; | exon_number | "3"; | gene_type | " |
| At_chr2 | Cufflinks | exon | 42023352 | 42024216 | . | + | . | gene_id | "XLOC_052308"; | transcript_id | "Novel_000685"; | exon_number | "1"; | gene_type | " |
| At_chr2 | Cufflinks | exon | 42024276 | 42026384 | . | + | . | gene_id | "XLOC_052308"; | transcript_id | "Novel_000685"; | exon_number | "2"; | gene_type | " |
| At_chr2 | Cufflinks | exon | 49252746 | 49253118 | . | + | . | gene_id | "XLOC_052637"; | transcript_id | "Novel_000686"; | exon_number | "1"; | gene_type | " |
| At_chr2 | Cufflinks | exon | 49253823 | 49254240 | . | + | . | gene_id | "XLOC_052637"; | transcript_id | "Novel_000686"; | exon_number | "2"; | gene_type | " |
| At_chr2 | Cufflinks | exon | 58761009 | 58761086 | . | + | . | gene_id | "XLOC_053117"; | transcript_id | "Novel_000687"; | exon_number | "1"; | gene_type | " |
| At_chr2 | Cufflinks | exon | 58761192 | 58761425 | . | + | . | gene_id | "XLOC_053117"; | transcript_id | "Novel_000687"; | exon_number | "2"; | gene_type | " |
| At_chr2 | Cufflinks | exon | 58761791 | 58762779 | . | + | . | gene_id | "XLOC_053117"; | transcript_id | "Novel_000687"; | exon_number | "3"; | gene_type | " |
| At_chr2 | Cufflinks | exon | 60688907 | 60689686 | . | + | . | gene_id | "XLOC_053204"; | transcript_id | "Novel_000688"; | exon_number | "1"; | gene_type | " |
| At_chr2 | Cufflinks | exon | 60689791 | 60690261 | . | + | . | gene_id | "XLOC_053204"; | transcript_id | "Novel_000688"; | exon_number | "2"; | gene_type | " |
| At_chr2 | Cufflinks | exon | 60937597 | 60937821 | . | + | . | gene_id | "XLOC_053232"; | transcript_id | "Novel_000689"; | exon_number | "1"; | gene_type | " |



|         |           |      |          |          |   |   |         |                |               |                 |             |      |           |   |
|---------|-----------|------|----------|----------|---|---|---------|----------------|---------------|-----------------|-------------|------|-----------|---|
| At_chr2 | Cufflinks | exon | 1700697  | 1700765  | . | . | gene_id | "XLOC_053326"; | transcript_id | "Novel_000690"; | exon_number | "1"; | gene_type | " |
| At_chr2 | Cufflinks | exon | 1700894  | 1700956  | . | . | gene_id | "XLOC_053326"; | transcript_id | "Novel_000690"; | exon_number | "2"; | gene_type | " |
| At_chr2 | Cufflinks | exon | 1701063  | 1701133  | . | . | gene_id | "XLOC_053326"; | transcript_id | "Novel_000690"; | exon_number | "3"; | gene_type | " |
| At_chr2 | Cufflinks | exon | 1701222  | 1701330  | . | . | gene_id | "XLOC_053326"; | transcript_id | "Novel_000690"; | exon_number | "4"; | gene_type | " |
| At_chr2 | Cufflinks | exon | 1702037  | 1702114  | . | . | gene_id | "XLOC_053326"; | transcript_id | "Novel_000690"; | exon_number | "5"; | gene_type | " |
| At_chr2 | Cufflinks | exon | 1703807  | 1704125  | . | . | gene_id | "XLOC_053326"; | transcript_id | "Novel_000690"; | exon_number | "6"; | gene_type | " |
| At_chr2 | Cufflinks | exon | 5406066  | 5406748  | . | . | gene_id | "XLOC_053546"; | transcript_id | "Novel_000691"; | exon_number | "1"; | gene_type | " |
| At_chr2 | Cufflinks | exon | 5406824  | 5406985  | . | . | gene_id | "XLOC_053546"; | transcript_id | "Novel_000691"; | exon_number | "2"; | gene_type | " |
| At_chr2 | Cufflinks | exon | 5407068  | 5407252  | . | . | gene_id | "XLOC_053546"; | transcript_id | "Novel_000691"; | exon_number | "3"; | gene_type | " |
| At_chr2 | Cufflinks | exon | 5636604  | 5637269  | . | . | gene_id | "XLOC_053580"; | transcript_id | "Novel_000692"; | exon_number | "1"; | gene_type | " |
| At_chr2 | Cufflinks | exon | 5637370  | 5637935  | . | . | gene_id | "XLOC_053580"; | transcript_id | "Novel_000692"; | exon_number | "2"; | gene_type | " |
| At_chr2 | Cufflinks | exon | 5951429  | 5951660  | . | . | gene_id | "XLOC_053619"; | transcript_id | "Novel_000693"; | exon_number | "1"; | gene_type | " |
| At_chr2 | Cufflinks | exon | 7473243  | 7474324  | . | . | gene_id | "XLOC_053819"; | transcript_id | "Novel_000694"; | exon_number | "1"; | gene_type | " |
| At_chr2 | Cufflinks | exon | 7475335  | 7475369  | . | . | gene_id | "XLOC_053819"; | transcript_id | "Novel_000694"; | exon_number | "2"; | gene_type | " |
| At_chr2 | Cufflinks | exon | 7475461  | 7475544  | . | . | gene_id | "XLOC_053819"; | transcript_id | "Novel_000694"; | exon_number | "3"; | gene_type | " |
| At_chr2 | Cufflinks | exon | 7475665  | 7475727  | . | . | gene_id | "XLOC_053819"; | transcript_id | "Novel_000694"; | exon_number | "4"; | gene_type | " |
| At_chr2 | Cufflinks | exon | 7476713  | 7476750  | . | . | gene_id | "XLOC_053819"; | transcript_id | "Novel_000694"; | exon_number | "5"; | gene_type | " |
| At_chr2 | Cufflinks | exon | 7477170  | 7477364  | . | . | gene_id | "XLOC_053819"; | transcript_id | "Novel_000694"; | exon_number | "6"; | gene_type | " |
| At_chr2 | Cufflinks | exon | 7473271  | 7473310  | . | . | gene_id | "XLOC_053819"; | transcript_id | "Novel_000695"; | exon_number | "1"; | gene_type | " |
| At_chr2 | Cufflinks | exon | 7474239  | 7474324  | . | . | gene_id | "XLOC_053819"; | transcript_id | "Novel_000695"; | exon_number | "2"; | gene_type | " |
| At_chr2 | Cufflinks | exon | 7475335  | 7475369  | . | . | gene_id | "XLOC_053819"; | transcript_id | "Novel_000695"; | exon_number | "3"; | gene_type | " |
| At_chr2 | Cufflinks | exon | 7475461  | 7475544  | . | . | gene_id | "XLOC_053819"; | transcript_id | "Novel_000695"; | exon_number | "4"; | gene_type | " |
| At_chr2 | Cufflinks | exon | 7475665  | 7475721  | . | . | gene_id | "XLOC_053819"; | transcript_id | "Novel_000695"; | exon_number | "5"; | gene_type | " |
| At_chr2 | Cufflinks | exon | 7476713  | 7476750  | . | . | gene_id | "XLOC_053819"; | transcript_id | "Novel_000695"; | exon_number | "6"; | gene_type | " |
| At_chr2 | Cufflinks | exon | 7477170  | 7477274  | . | . | gene_id | "XLOC_053819"; | transcript_id | "Novel_000695"; | exon_number | "7"; | gene_type | " |
| At_chr2 | Cufflinks | exon | 8088651  | 8089467  | . | . | gene_id | "XLOC_053892"; | transcript_id | "Novel_000696"; | exon_number | "1"; | gene_type | " |
| At_chr2 | Cufflinks | exon | 8089573  | 8089660  | . | . | gene_id | "XLOC_053892"; | transcript_id | "Novel_000696"; | exon_number | "2"; | gene_type | " |
| At_chr2 | Cufflinks | exon | 8139074  | 8139442  | . | . | gene_id | "XLOC_053897"; | transcript_id | "Novel_000697"; | exon_number | "1"; | gene_type | " |
| At_chr2 | Cufflinks | exon | 11459459 | 11459835 | . | . | gene_id | "XLOC_054161"; | transcript_id | "Novel_000698"; | exon_number | "1"; | gene_type | " |
| At_chr2 | Cufflinks | exon | 11460427 | 11460810 | . | . | gene_id | "XLOC_054161"; | transcript_id | "Novel_000698"; | exon_number | "2"; | gene_type | " |
| At_chr2 | Cufflinks | exon | 11466242 | 11466460 | . | . | gene_id | "XLOC_054164"; | transcript_id | "Novel_000699"; | exon_number | "1"; | gene_type | " |
| At_chr2 | Cufflinks | exon | 11530459 | 11530741 | . | . | gene_id | "XLOC_054171"; | transcript_id | "Novel_000700"; | exon_number | "1"; | gene_type | " |
| At_chr2 | Cufflinks | exon | 11530818 | 11530876 | . | . | gene_id | "XLOC_054171"; | transcript_id | "Novel_000700"; | exon_number | "2"; | gene_type | " |
| At_chr2 | Cufflinks | exon | 17134809 | 17135827 | . | . | gene_id | "XLOC_054534"; | transcript_id | "Novel_000701"; | exon_number | "1"; | gene_type | " |
| At_chr2 | Cufflinks | exon | 17136150 | 17136209 | . | . | gene_id | "XLOC_054534"; | transcript_id | "Novel_000701"; | exon_number | "2"; | gene_type | " |

|         |           |      |          |          |   |   |   |         |                |               |                 |             |      |           |   |
|---------|-----------|------|----------|----------|---|---|---|---------|----------------|---------------|-----------------|-------------|------|-----------|---|
| At_chr2 | Cufflinks | exon | 17136314 | 17136463 | . | - | . | gene_id | "XLOC_054534"; | transcript_id | "Novel_000701"; | exon_number | "3"; | gene_type | " |
| At_chr2 | Cufflinks | exon | 17136554 | 17136640 | . | - | . | gene_id | "XLOC_054534"; | transcript_id | "Novel_000701"; | exon_number | "4"; | gene_type | " |
| At_chr2 | Cufflinks | exon | 17136713 | 17136783 | . | - | . | gene_id | "XLOC_054534"; | transcript_id | "Novel_000701"; | exon_number | "5"; | gene_type | " |
| At_chr2 | Cufflinks | exon | 17136862 | 17136946 | . | - | . | gene_id | "XLOC_054534"; | transcript_id | "Novel_000701"; | exon_number | "6"; | gene_type | " |
| At_chr2 | Cufflinks | exon | 17134809 | 17135827 | . | - | . | gene_id | "XLOC_054534"; | transcript_id | "Novel_000702"; | exon_number | "1"; | gene_type | " |
| At_chr2 | Cufflinks | exon | 17136150 | 17136209 | . | - | . | gene_id | "XLOC_054534"; | transcript_id | "Novel_000702"; | exon_number | "2"; | gene_type | " |
| At_chr2 | Cufflinks | exon | 17136314 | 17136463 | . | - | . | gene_id | "XLOC_054534"; | transcript_id | "Novel_000702"; | exon_number | "3"; | gene_type | " |
| At_chr2 | Cufflinks | exon | 17136554 | 17136783 | . | - | . | gene_id | "XLOC_054534"; | transcript_id | "Novel_000702"; | exon_number | "4"; | gene_type | " |
| At_chr2 | Cufflinks | exon | 17136862 | 17136955 | . | - | . | gene_id | "XLOC_054534"; | transcript_id | "Novel_000702"; | exon_number | "5"; | gene_type | " |
| At_chr2 | Cufflinks | exon | 17765029 | 17765204 | . | - | . | gene_id | "XLOC_054566"; | transcript_id | "Novel_000703"; | exon_number | "1"; | gene_type | " |
| At_chr2 | Cufflinks | exon | 17765304 | 17765359 | . | - | . | gene_id | "XLOC_054566"; | transcript_id | "Novel_000703"; | exon_number | "2"; | gene_type | " |
| At_chr2 | Cufflinks | exon | 17765520 | 17766292 | . | - | . | gene_id | "XLOC_054566"; | transcript_id | "Novel_000704"; | exon_number | "1"; | gene_type | " |
| At_chr2 | Cufflinks | exon | 17767058 | 17767594 | . | - | . | gene_id | "XLOC_054566"; | transcript_id | "Novel_000704"; | exon_number | "2"; | gene_type | " |
| At_chr2 | Cufflinks | exon | 19991431 | 19992043 | . | - | . | gene_id | "XLOC_054726"; | transcript_id | "Novel_000705"; | exon_number | "1"; | gene_type | " |
| At_chr2 | Cufflinks | exon | 19993857 | 19993985 | . | - | . | gene_id | "XLOC_054726"; | transcript_id | "Novel_000705"; | exon_number | "2"; | gene_type | " |
| At_chr2 | Cufflinks | exon | 19994102 | 19994149 | . | - | . | gene_id | "XLOC_054726"; | transcript_id | "Novel_000705"; | exon_number | "3"; | gene_type | " |
| At_chr2 | Cufflinks | exon | 19994314 | 19994511 | . | - | . | gene_id | "XLOC_054726"; | transcript_id | "Novel_000705"; | exon_number | "4"; | gene_type | " |
| At_chr2 | Cufflinks | exon | 22394525 | 22396910 | . | - | . | gene_id | "XLOC_054806"; | transcript_id | "Novel_000706"; | exon_number | "1"; | gene_type | " |
| At_chr2 | Cufflinks | exon | 22398128 | 22398302 | . | - | . | gene_id | "XLOC_054806"; | transcript_id | "Novel_000706"; | exon_number | "2"; | gene_type | " |
| At_chr2 | Cufflinks | exon | 22955227 | 22955492 | . | - | . | gene_id | "XLOC_054831"; | transcript_id | "Novel_000707"; | exon_number | "1"; | gene_type | " |
| At_chr2 | Cufflinks | exon | 22956555 | 22956697 | . | - | . | gene_id | "XLOC_054831"; | transcript_id | "Novel_000707"; | exon_number | "2"; | gene_type | " |
| At_chr2 | Cufflinks | exon | 22956835 | 22956847 | . | - | . | gene_id | "XLOC_054831"; | transcript_id | "Novel_000707"; | exon_number | "3"; | gene_type | " |
| At_chr2 | Cufflinks | exon | 22955286 | 22955492 | . | - | . | gene_id | "XLOC_054831"; | transcript_id | "Novel_000708"; | exon_number | "1"; | gene_type | " |
| At_chr2 | Cufflinks | exon | 22956555 | 22956847 | . | - | . | gene_id | "XLOC_054831"; | transcript_id | "Novel_000708"; | exon_number | "2"; | gene_type | " |
| At_chr2 | Cufflinks | exon | 22956952 | 22957049 | . | - | . | gene_id | "XLOC_054833"; | transcript_id | "Novel_000709"; | exon_number | "1"; | gene_type | " |
| At_chr2 | Cufflinks | exon | 22957617 | 22957710 | . | - | . | gene_id | "XLOC_054833"; | transcript_id | "Novel_000709"; | exon_number | "2"; | gene_type | " |
| At_chr2 | Cufflinks | exon | 22957985 | 22958218 | . | - | . | gene_id | "XLOC_054833"; | transcript_id | "Novel_000709"; | exon_number | "3"; | gene_type | " |
| At_chr2 | Cufflinks | exon | 22958317 | 22958640 | . | - | . | gene_id | "XLOC_054833"; | transcript_id | "Novel_000709"; | exon_number | "4"; | gene_type | " |
| At_chr2 | Cufflinks | exon | 22957193 | 22957710 | . | - | . | gene_id | "XLOC_054833"; | transcript_id | "Novel_000710"; | exon_number | "1"; | gene_type | " |
| At_chr2 | Cufflinks | exon | 22957985 | 22958218 | . | - | . | gene_id | "XLOC_054833"; | transcript_id | "Novel_000710"; | exon_number | "2"; | gene_type | " |
| At_chr2 | Cufflinks | exon | 22958317 | 22958640 | . | - | . | gene_id | "XLOC_054833"; | transcript_id | "Novel_000710"; | exon_number | "3"; | gene_type | " |
| At_chr2 | Cufflinks | exon | 22957719 | 22958218 | . | - | . | gene_id | "XLOC_054833"; | transcript_id | "Novel_000711"; | exon_number | "1"; | gene_type | " |
| At_chr2 | Cufflinks | exon | 22958317 | 22958640 | . | - | . | gene_id | "XLOC_054833"; | transcript_id | "Novel_000711"; | exon_number | "2"; | gene_type | " |
| At_chr2 | Cufflinks | exon | 23230164 | 23230825 | . | - | . | gene_id | "XLOC_054857"; | transcript_id | "Novel_000712"; | exon_number | "1"; | gene_type | " |
| At_chr2 | Cufflinks | exon | 23230898 | 23231018 | . | - | . | gene_id | "XLOC_054857"; | transcript_id | "Novel_000712"; | exon_number | "2"; | gene_type | " |

|         |           |      |          |          |   |   |   |         |                |               |                 |             |      |           |   |
|---------|-----------|------|----------|----------|---|---|---|---------|----------------|---------------|-----------------|-------------|------|-----------|---|
| At_chr2 | Cufflinks | exon | 23232288 | 23232353 | . | - | . | gene_id | "XLOC_054857"; | transcript_id | "Novel_000712"; | exon_number | "3"; | gene_type | " |
| At_chr2 | Cufflinks | exon | 23232529 | 23232684 | . | - | . | gene_id | "XLOC_054857"; | transcript_id | "Novel_000712"; | exon_number | "4"; | gene_type | " |
| At_chr2 | Cufflinks | exon | 23233876 | 23234029 | . | - | . | gene_id | "XLOC_054857"; | transcript_id | "Novel_000712"; | exon_number | "5"; | gene_type | " |
| At_chr2 | Cufflinks | exon | 23230164 | 23230825 | . | - | . | gene_id | "XLOC_054857"; | transcript_id | "Novel_000713"; | exon_number | "1"; | gene_type | " |
| At_chr2 | Cufflinks | exon | 23230898 | 23231018 | . | - | . | gene_id | "XLOC_054857"; | transcript_id | "Novel_000713"; | exon_number | "2"; | gene_type | " |
| At_chr2 | Cufflinks | exon | 23232284 | 23232353 | . | - | . | gene_id | "XLOC_054857"; | transcript_id | "Novel_000713"; | exon_number | "3"; | gene_type | " |
| At_chr2 | Cufflinks | exon | 23232529 | 23232684 | . | - | . | gene_id | "XLOC_054857"; | transcript_id | "Novel_000713"; | exon_number | "4"; | gene_type | " |
| At_chr2 | Cufflinks | exon | 23233876 | 23234029 | . | - | . | gene_id | "XLOC_054857"; | transcript_id | "Novel_000713"; | exon_number | "5"; | gene_type | " |
| At_chr2 | Cufflinks | exon | 28119366 | 28120495 | . | - | . | gene_id | "XLOC_055062"; | transcript_id | "Novel_000714"; | exon_number | "1"; | gene_type | " |
| At_chr2 | Cufflinks | exon | 28120653 | 28120871 | . | - | . | gene_id | "XLOC_055062"; | transcript_id | "Novel_000714"; | exon_number | "2"; | gene_type | " |
| At_chr2 | Cufflinks | exon | 28121486 | 28121515 | . | - | . | gene_id | "XLOC_055062"; | transcript_id | "Novel_000714"; | exon_number | "3"; | gene_type | " |
| At_chr2 | Cufflinks | exon | 28121582 | 28121683 | . | - | . | gene_id | "XLOC_055062"; | transcript_id | "Novel_000714"; | exon_number | "4"; | gene_type | " |
| At_chr2 | Cufflinks | exon | 28121977 | 28122057 | . | - | . | gene_id | "XLOC_055062"; | transcript_id | "Novel_000714"; | exon_number | "5"; | gene_type | " |
| At_chr2 | Cufflinks | exon | 28122649 | 28122750 | . | - | . | gene_id | "XLOC_055062"; | transcript_id | "Novel_000714"; | exon_number | "6"; | gene_type | " |
| At_chr2 | Cufflinks | exon | 28122847 | 28123258 | . | - | . | gene_id | "XLOC_055062"; | transcript_id | "Novel_000714"; | exon_number | "7"; | gene_type | " |
| At_chr2 | Cufflinks | exon | 28119366 | 28120495 | . | - | . | gene_id | "XLOC_055062"; | transcript_id | "Novel_000715"; | exon_number | "1"; | gene_type | " |
| At_chr2 | Cufflinks | exon | 28120653 | 28120871 | . | - | . | gene_id | "XLOC_055062"; | transcript_id | "Novel_000715"; | exon_number | "2"; | gene_type | " |
| At_chr2 | Cufflinks | exon | 28121486 | 28121500 | . | - | . | gene_id | "XLOC_055062"; | transcript_id | "Novel_000715"; | exon_number | "3"; | gene_type | " |
| At_chr2 | Cufflinks | exon | 28121567 | 28121683 | . | - | . | gene_id | "XLOC_055062"; | transcript_id | "Novel_000715"; | exon_number | "4"; | gene_type | " |
| At_chr2 | Cufflinks | exon | 28121977 | 28122057 | . | - | . | gene_id | "XLOC_055062"; | transcript_id | "Novel_000715"; | exon_number | "5"; | gene_type | " |
| At_chr2 | Cufflinks | exon | 28122649 | 28122750 | . | - | . | gene_id | "XLOC_055062"; | transcript_id | "Novel_000715"; | exon_number | "6"; | gene_type | " |
| At_chr2 | Cufflinks | exon | 28122847 | 28123258 | . | - | . | gene_id | "XLOC_055062"; | transcript_id | "Novel_000715"; | exon_number | "7"; | gene_type | " |
| At_chr2 | Cufflinks | exon | 28121287 | 28121500 | . | - | . | gene_id | "XLOC_055062"; | transcript_id | "Novel_000716"; | exon_number | "1"; | gene_type | " |
| At_chr2 | Cufflinks | exon | 28121567 | 28121683 | . | - | . | gene_id | "XLOC_055062"; | transcript_id | "Novel_000716"; | exon_number | "2"; | gene_type | " |
| At_chr2 | Cufflinks | exon | 28121977 | 28122057 | . | - | . | gene_id | "XLOC_055062"; | transcript_id | "Novel_000716"; | exon_number | "3"; | gene_type | " |
| At_chr2 | Cufflinks | exon | 28122649 | 28122750 | . | - | . | gene_id | "XLOC_055062"; | transcript_id | "Novel_000716"; | exon_number | "4"; | gene_type | " |
| At_chr2 | Cufflinks | exon | 28122847 | 28123296 | . | - | . | gene_id | "XLOC_055062"; | transcript_id | "Novel_000716"; | exon_number | "5"; | gene_type | " |
| At_chr2 | Cufflinks | exon | 39550619 | 39552048 | . | - | . | gene_id | "XLOC_055545"; | transcript_id | "Novel_000717"; | exon_number | "1"; | gene_type | " |
| At_chr2 | Cufflinks | exon | 39552713 | 39552820 | . | - | . | gene_id | "XLOC_055545"; | transcript_id | "Novel_000717"; | exon_number | "2"; | gene_type | " |
| At_chr2 | Cufflinks | exon | 47183281 | 47183768 | . | - | . | gene_id | "XLOC_055904"; | transcript_id | "Novel_000718"; | exon_number | "1"; | gene_type | " |
| At_chr2 | Cufflinks | exon | 47184165 | 47185478 | . | - | . | gene_id | "XLOC_055904"; | transcript_id | "Novel_000718"; | exon_number | "2"; | gene_type | " |
| At_chr2 | Cufflinks | exon | 56048536 | 56048930 | . | - | . | gene_id | "XLOC_056304"; | transcript_id | "Novel_000719"; | exon_number | "1"; | gene_type | " |
| At_chr2 | Cufflinks | exon | 56049100 | 56049219 | . | - | . | gene_id | "XLOC_056304"; | transcript_id | "Novel_000719"; | exon_number | "2"; | gene_type | " |
| At_chr2 | Cufflinks | exon | 58609962 | 58610019 | . | - | . | gene_id | "XLOC_056475"; | transcript_id | "Novel_000720"; | exon_number | "1"; | gene_type | " |
| At_chr2 | Cufflinks | exon | 58610134 | 58610362 | . | - | . | gene_id | "XLOC_056475"; | transcript_id | "Novel_000720"; | exon_number | "2"; | gene_type | " |

|         |           |      |          |          |   |   |   |         |                |               |                 |             |       |           |   |
|---------|-----------|------|----------|----------|---|---|---|---------|----------------|---------------|-----------------|-------------|-------|-----------|---|
| At_chr2 | Cufflinks | exon | 59790033 | 59790409 | . | - | . | gene_id | "XLOC_056547"; | transcript_id | "Novel_000721"; | exon_number | "1";  | gene_type | " |
| At_chr2 | Cufflinks | exon | 59790865 | 59790963 | . | - | . | gene_id | "XLOC_056547"; | transcript_id | "Novel_000721"; | exon_number | "2";  | gene_type | " |
| At_chr2 | Cufflinks | exon | 59791060 | 59791116 | . | - | . | gene_id | "XLOC_056547"; | transcript_id | "Novel_000721"; | exon_number | "3";  | gene_type | " |
| At_chr2 | Cufflinks | exon | 59791207 | 59791321 | . | - | . | gene_id | "XLOC_056547"; | transcript_id | "Novel_000721"; | exon_number | "4";  | gene_type | " |
| At_chr2 | Cufflinks | exon | 59791402 | 59791467 | . | - | . | gene_id | "XLOC_056547"; | transcript_id | "Novel_000721"; | exon_number | "5";  | gene_type | " |
| At_chr2 | Cufflinks | exon | 59791557 | 59791601 | . | - | . | gene_id | "XLOC_056547"; | transcript_id | "Novel_000721"; | exon_number | "6";  | gene_type | " |
| At_chr2 | Cufflinks | exon | 59791740 | 59791779 | . | - | . | gene_id | "XLOC_056547"; | transcript_id | "Novel_000721"; | exon_number | "7";  | gene_type | " |
| At_chr2 | Cufflinks | exon | 59792017 | 59792066 | . | - | . | gene_id | "XLOC_056547"; | transcript_id | "Novel_000721"; | exon_number | "8";  | gene_type | " |
| At_chr2 | Cufflinks | exon | 59792156 | 59792240 | . | - | . | gene_id | "XLOC_056547"; | transcript_id | "Novel_000721"; | exon_number | "9";  | gene_type | " |
| At_chr2 | Cufflinks | exon | 59792367 | 59792461 | . | - | . | gene_id | "XLOC_056547"; | transcript_id | "Novel_000721"; | exon_number | "10"; | gene_type | " |
| At_chr2 | Cufflinks | exon | 59792629 | 59792729 | . | - | . | gene_id | "XLOC_056547"; | transcript_id | "Novel_000721"; | exon_number | "11"; | gene_type | " |
| At_chr3 | Cufflinks | exon | 9745586  | 9745904  | . | + | . | gene_id | "XLOC_057086"; | transcript_id | "Novel_000722"; | exon_number | "1";  | gene_type | " |
| At_chr3 | Cufflinks | exon | 9745992  | 9746065  | . | + | . | gene_id | "XLOC_057086"; | transcript_id | "Novel_000722"; | exon_number | "2";  | gene_type | " |
| At_chr3 | Cufflinks | exon | 9746222  | 9746354  | . | + | . | gene_id | "XLOC_057086"; | transcript_id | "Novel_000722"; | exon_number | "3";  | gene_type | " |
| At_chr3 | Cufflinks | exon | 9746761  | 9747026  | . | + | . | gene_id | "XLOC_057086"; | transcript_id | "Novel_000722"; | exon_number | "4";  | gene_type | " |
| At_chr3 | Cufflinks | exon | 11836932 | 11838265 | . | + | . | gene_id | "XLOC_057166"; | transcript_id | "Novel_000723"; | exon_number | "1";  | gene_type | " |
| At_chr3 | Cufflinks | exon | 11838377 | 11838493 | . | + | . | gene_id | "XLOC_057166"; | transcript_id | "Novel_000723"; | exon_number | "2";  | gene_type | " |
| At_chr3 | Cufflinks | exon | 11839895 | 11841387 | . | + | . | gene_id | "XLOC_057166"; | transcript_id | "Novel_000723"; | exon_number | "3";  | gene_type | " |
| At_chr3 | Cufflinks | exon | 19257346 | 19257577 | . | + | . | gene_id | "XLOC_057454"; | transcript_id | "Novel_000724"; | exon_number | "1";  | gene_type | " |
| At_chr3 | Cufflinks | exon | 19957320 | 19957344 | . | + | . | gene_id | "XLOC_057577"; | transcript_id | "Novel_000725"; | exon_number | "1";  | gene_type | " |
| At_chr3 | Cufflinks | exon | 19957494 | 19957575 | . | + | . | gene_id | "XLOC_057577"; | transcript_id | "Novel_000725"; | exon_number | "2";  | gene_type | " |
| At_chr3 | Cufflinks | exon | 19957704 | 19958040 | . | + | . | gene_id | "XLOC_057577"; | transcript_id | "Novel_000725"; | exon_number | "3";  | gene_type | " |
| At_chr3 | Cufflinks | exon | 20038576 | 20038793 | . | + | . | gene_id | "XLOC_057593"; | transcript_id | "Novel_000726"; | exon_number | "1";  | gene_type | " |
| At_chr3 | Cufflinks | exon | 20040236 | 20042009 | . | + | . | gene_id | "XLOC_057593"; | transcript_id | "Novel_000726"; | exon_number | "2";  | gene_type | " |
| At_chr3 | Cufflinks | exon | 27093697 | 27094228 | . | + | . | gene_id | "XLOC_057845"; | transcript_id | "Novel_000727"; | exon_number | "1";  | gene_type | " |
| At_chr3 | Cufflinks | exon | 27094760 | 27094842 | . | + | . | gene_id | "XLOC_057845"; | transcript_id | "Novel_000727"; | exon_number | "2";  | gene_type | " |
| At_chr3 | Cufflinks | exon | 27094967 | 27095062 | . | + | . | gene_id | "XLOC_057845"; | transcript_id | "Novel_000727"; | exon_number | "3";  | gene_type | " |
| At_chr3 | Cufflinks | exon | 27095810 | 27095978 | . | + | . | gene_id | "XLOC_057845"; | transcript_id | "Novel_000727"; | exon_number | "4";  | gene_type | " |
| At_chr3 | Cufflinks | exon | 27096059 | 27096201 | . | + | . | gene_id | "XLOC_057845"; | transcript_id | "Novel_000727"; | exon_number | "5";  | gene_type | " |
| At_chr3 | Cufflinks | exon | 27096273 | 27096359 | . | + | . | gene_id | "XLOC_057845"; | transcript_id | "Novel_000727"; | exon_number | "6";  | gene_type | " |
| At_chr3 | Cufflinks | exon | 27096575 | 27096760 | . | + | . | gene_id | "XLOC_057845"; | transcript_id | "Novel_000727"; | exon_number | "7";  | gene_type | " |
| At_chr3 | Cufflinks | exon | 27098107 | 27099003 | . | + | . | gene_id | "XLOC_057845"; | transcript_id | "Novel_000727"; | exon_number | "8";  | gene_type | " |
| At_chr3 | Cufflinks | exon | 27261786 | 27262052 | . | + | . | gene_id | "XLOC_057855"; | transcript_id | "Novel_000728"; | exon_number | "1";  | gene_type | " |
| At_chr3 | Cufflinks | exon | 27262177 | 27262255 | . | + | . | gene_id | "XLOC_057855"; | transcript_id | "Novel_000728"; | exon_number | "2";  | gene_type | " |
| At_chr3 | Cufflinks | exon | 27263127 | 27264125 | . | + | . | gene_id | "XLOC_057855"; | transcript_id | "Novel_000728"; | exon_number | "3";  | gene_type | " |



|         |           |      |          |          |   |   |   |         |                |               |                 |             |      |           |   |
|---------|-----------|------|----------|----------|---|---|---|---------|----------------|---------------|-----------------|-------------|------|-----------|---|
| At_chr3 | Cufflinks | exon | 36820250 | 36820690 | . | + | . | gene_id | "XLOC_058276"; | transcript_id | "Novel_000738"; | exon_number | "4"; | gene_type | " |
| At_chr3 | Cufflinks | exon | 36820843 | 36821680 | . | + | . | gene_id | "XLOC_058276"; | transcript_id | "Novel_000738"; | exon_number | "5"; | gene_type | " |
| At_chr3 | Cufflinks | exon | 36821765 | 36822302 | . | + | . | gene_id | "XLOC_058276"; | transcript_id | "Novel_000738"; | exon_number | "6"; | gene_type | " |
| At_chr3 | Cufflinks | exon | 36865590 | 36865920 | . | + | . | gene_id | "XLOC_058283"; | transcript_id | "Novel_000739"; | exon_number | "1"; | gene_type | " |
| At_chr3 | Cufflinks | exon | 36866587 | 36866910 | . | + | . | gene_id | "XLOC_058283"; | transcript_id | "Novel_000739"; | exon_number | "2"; | gene_type | " |
| At_chr3 | Cufflinks | exon | 38072341 | 38072616 | . | + | . | gene_id | "XLOC_058354"; | transcript_id | "Novel_000740"; | exon_number | "1"; | gene_type | " |
| At_chr3 | Cufflinks | exon | 38073613 | 38074957 | . | + | . | gene_id | "XLOC_058354"; | transcript_id | "Novel_000740"; | exon_number | "2"; | gene_type | " |
| At_chr3 | Cufflinks | exon | 41084988 | 41086386 | . | + | . | gene_id | "XLOC_058633"; | transcript_id | "Novel_000741"; | exon_number | "1"; | gene_type | " |
| At_chr3 | Cufflinks | exon | 41086519 | 41087194 | . | + | . | gene_id | "XLOC_058633"; | transcript_id | "Novel_000741"; | exon_number | "2"; | gene_type | " |
| At_chr3 | Cufflinks | exon | 41084988 | 41086386 | . | + | . | gene_id | "XLOC_058633"; | transcript_id | "Novel_000742"; | exon_number | "1"; | gene_type | " |
| At_chr3 | Cufflinks | exon | 41086519 | 41086622 | . | + | . | gene_id | "XLOC_058633"; | transcript_id | "Novel_000742"; | exon_number | "2"; | gene_type | " |
| At_chr3 | Cufflinks | exon | 41086905 | 41087194 | . | + | . | gene_id | "XLOC_058633"; | transcript_id | "Novel_000742"; | exon_number | "3"; | gene_type | " |
| At_chr3 | Cufflinks | exon | 41416973 | 41417227 | . | + | . | gene_id | "XLOC_058662"; | transcript_id | "Novel_000743"; | exon_number | "1"; | gene_type | " |
| At_chr3 | Cufflinks | exon | 41418081 | 41418150 | . | + | . | gene_id | "XLOC_058662"; | transcript_id | "Novel_000743"; | exon_number | "2"; | gene_type | " |
| At_chr3 | Cufflinks | exon | 41429570 | 41430575 | . | + | . | gene_id | "XLOC_058662"; | transcript_id | "Novel_000743"; | exon_number | "3"; | gene_type | " |
| At_chr3 | Cufflinks | exon | 41906849 | 41907009 | . | + | . | gene_id | "XLOC_058729"; | transcript_id | "Novel_000744"; | exon_number | "1"; | gene_type | " |
| At_chr3 | Cufflinks | exon | 41907122 | 41907326 | . | + | . | gene_id | "XLOC_058729"; | transcript_id | "Novel_000744"; | exon_number | "2"; | gene_type | " |
| At_chr3 | Cufflinks | exon | 41907915 | 41907987 | . | + | . | gene_id | "XLOC_058729"; | transcript_id | "Novel_000744"; | exon_number | "3"; | gene_type | " |
| At_chr3 | Cufflinks | exon | 41908310 | 41908403 | . | + | . | gene_id | "XLOC_058729"; | transcript_id | "Novel_000744"; | exon_number | "4"; | gene_type | " |
| At_chr3 | Cufflinks | exon | 41909004 | 41909714 | . | + | . | gene_id | "XLOC_058729"; | transcript_id | "Novel_000744"; | exon_number | "5"; | gene_type | " |
| At_chr3 | Cufflinks | exon | 41906849 | 41909104 | . | + | . | gene_id | "XLOC_058729"; | transcript_id | "Novel_000745"; | exon_number | "1"; | gene_type | " |
| At_chr3 | Cufflinks | exon | 41909582 | 41909729 | . | + | . | gene_id | "XLOC_058729"; | transcript_id | "Novel_000745"; | exon_number | "2"; | gene_type | " |
| At_chr3 | Cufflinks | exon | 44627319 | 44627476 | . | + | . | gene_id | "XLOC_058973"; | transcript_id | "Novel_000746"; | exon_number | "1"; | gene_type | " |
| At_chr3 | Cufflinks | exon | 44627580 | 44627666 | . | + | . | gene_id | "XLOC_058973"; | transcript_id | "Novel_000746"; | exon_number | "2"; | gene_type | " |
| At_chr3 | Cufflinks | exon | 44627767 | 44627869 | . | + | . | gene_id | "XLOC_058973"; | transcript_id | "Novel_000746"; | exon_number | "3"; | gene_type | " |
| At_chr3 | Cufflinks | exon | 44629957 | 44630023 | . | + | . | gene_id | "XLOC_058973"; | transcript_id | "Novel_000746"; | exon_number | "4"; | gene_type | " |
| At_chr3 | Cufflinks | exon | 44630103 | 44630551 | . | + | . | gene_id | "XLOC_058973"; | transcript_id | "Novel_000746"; | exon_number | "5"; | gene_type | " |
| At_chr3 | Cufflinks | exon | 46608694 | 46608953 | . | + | . | gene_id | "XLOC_059141"; | transcript_id | "Novel_000747"; | exon_number | "1"; | gene_type | " |
| At_chr3 | Cufflinks | exon | 47181707 | 47182101 | . | + | . | gene_id | "XLOC_059173"; | transcript_id | "Novel_000748"; | exon_number | "1"; | gene_type | " |
| At_chr3 | Cufflinks | exon | 47182631 | 47182750 | . | + | . | gene_id | "XLOC_059173"; | transcript_id | "Novel_000748"; | exon_number | "2"; | gene_type | " |
| At_chr3 | Cufflinks | exon | 47183960 | 47184750 | . | + | . | gene_id | "XLOC_059173"; | transcript_id | "Novel_000748"; | exon_number | "3"; | gene_type | " |
| At_chr3 | Cufflinks | exon | 47181740 | 47182750 | . | + | . | gene_id | "XLOC_059173"; | transcript_id | "Novel_000749"; | exon_number | "1"; | gene_type | " |
| At_chr3 | Cufflinks | exon | 47183960 | 47184048 | . | + | . | gene_id | "XLOC_059173"; | transcript_id | "Novel_000749"; | exon_number | "2"; | gene_type | " |
| At_chr3 | Cufflinks | exon | 47184198 | 47184546 | . | + | . | gene_id | "XLOC_059173"; | transcript_id | "Novel_000749"; | exon_number | "3"; | gene_type | " |
| At_chr3 | Cufflinks | exon | 47181740 | 47182101 | . | + | . | gene_id | "XLOC_059173"; | transcript_id | "Novel_000750"; | exon_number | "1"; | gene_type | " |

|         |           |      |          |          |   |   |   |         |                |               |                 |             |      |           |   |
|---------|-----------|------|----------|----------|---|---|---|---------|----------------|---------------|-----------------|-------------|------|-----------|---|
| At_chr3 | Cufflinks | exon | 47182679 | 47182750 | . | + | . | gene_id | "XLOC_059173"; | transcript_id | "Novel_000750"; | exon_number | "2"; | gene_type | " |
| At_chr3 | Cufflinks | exon | 47183960 | 47184048 | . | + | . | gene_id | "XLOC_059173"; | transcript_id | "Novel_000750"; | exon_number | "3"; | gene_type | " |
| At_chr3 | Cufflinks | exon | 47184198 | 47184546 | . | + | . | gene_id | "XLOC_059173"; | transcript_id | "Novel_000750"; | exon_number | "4"; | gene_type | " |
| At_chr3 | Cufflinks | exon | 47779057 | 47779389 | . | + | . | gene_id | "XLOC_059201"; | transcript_id | "Novel_000751"; | exon_number | "1"; | gene_type | " |
| At_chr3 | Cufflinks | exon | 47780567 | 47780949 | . | + | . | gene_id | "XLOC_059201"; | transcript_id | "Novel_000751"; | exon_number | "2"; | gene_type | " |
| At_chr3 | Cufflinks | exon | 47786344 | 47787548 | . | + | . | gene_id | "XLOC_059201"; | transcript_id | "Novel_000751"; | exon_number | "3"; | gene_type | " |
| At_chr3 | Cufflinks | exon | 47780387 | 47780949 | . | + | . | gene_id | "XLOC_059201"; | transcript_id | "Novel_000752"; | exon_number | "1"; | gene_type | " |
| At_chr3 | Cufflinks | exon | 47786344 | 47787548 | . | + | . | gene_id | "XLOC_059201"; | transcript_id | "Novel_000752"; | exon_number | "2"; | gene_type | " |
| At_chr3 | Cufflinks | exon | 69172912 | 69172940 | . | + | . | gene_id | "XLOC_059854"; | transcript_id | "Novel_000753"; | exon_number | "1"; | gene_type | " |
| At_chr3 | Cufflinks | exon | 69173051 | 69173587 | . | + | . | gene_id | "XLOC_059854"; | transcript_id | "Novel_000753"; | exon_number | "2"; | gene_type | " |
| At_chr3 | Cufflinks | exon | 69766502 | 69766723 | . | + | . | gene_id | "XLOC_059891"; | transcript_id | "Novel_000754"; | exon_number | "1"; | gene_type | " |
| At_chr3 | Cufflinks | exon | 69767881 | 69767991 | . | + | . | gene_id | "XLOC_059891"; | transcript_id | "Novel_000754"; | exon_number | "2"; | gene_type | " |
| At_chr3 | Cufflinks | exon | 70751204 | 70751469 | . | + | . | gene_id | "XLOC_059936"; | transcript_id | "Novel_000755"; | exon_number | "1"; | gene_type | " |
| At_chr3 | Cufflinks | exon | 72436760 | 72436993 | . | + | . | gene_id | "XLOC_059978"; | transcript_id | "Novel_000756"; | exon_number | "1"; | gene_type | " |
| At_chr3 | Cufflinks | exon | 72437244 | 72437406 | . | + | . | gene_id | "XLOC_059978"; | transcript_id | "Novel_000756"; | exon_number | "2"; | gene_type | " |
| At_chr3 | Cufflinks | exon | 72437542 | 72438059 | . | + | . | gene_id | "XLOC_059978"; | transcript_id | "Novel_000756"; | exon_number | "3"; | gene_type | " |
| At_chr3 | Cufflinks | exon | 72444481 | 72445161 | . | + | . | gene_id | "XLOC_059978"; | transcript_id | "Novel_000756"; | exon_number | "4"; | gene_type | " |
| At_chr3 | Cufflinks | exon | 72436761 | 72436989 | . | + | . | gene_id | "XLOC_059978"; | transcript_id | "Novel_000757"; | exon_number | "1"; | gene_type | " |
| At_chr3 | Cufflinks | exon | 72437244 | 72437406 | . | + | . | gene_id | "XLOC_059978"; | transcript_id | "Novel_000757"; | exon_number | "2"; | gene_type | " |
| At_chr3 | Cufflinks | exon | 72437542 | 72438059 | . | + | . | gene_id | "XLOC_059978"; | transcript_id | "Novel_000757"; | exon_number | "3"; | gene_type | " |
| At_chr3 | Cufflinks | exon | 72444481 | 72445172 | . | + | . | gene_id | "XLOC_059978"; | transcript_id | "Novel_000757"; | exon_number | "4"; | gene_type | " |
| At_chr3 | Cufflinks | exon | 72884845 | 72885176 | . | + | . | gene_id | "XLOC_059995"; | transcript_id | "Novel_000758"; | exon_number | "1"; | gene_type | " |
| At_chr3 | Cufflinks | exon | 72885305 | 72887431 | . | + | . | gene_id | "XLOC_059995"; | transcript_id | "Novel_000758"; | exon_number | "2"; | gene_type | " |
| At_chr3 | Cufflinks | exon | 72888049 | 72888125 | . | + | . | gene_id | "XLOC_059995"; | transcript_id | "Novel_000758"; | exon_number | "3"; | gene_type | " |
| At_chr3 | Cufflinks | exon | 72888227 | 72890818 | . | + | . | gene_id | "XLOC_059995"; | transcript_id | "Novel_000758"; | exon_number | "4"; | gene_type | " |
| At_chr3 | Cufflinks | exon | 72892266 | 72892349 | . | + | . | gene_id | "XLOC_059995"; | transcript_id | "Novel_000758"; | exon_number | "5"; | gene_type | " |
| At_chr3 | Cufflinks | exon | 72893495 | 72893616 | . | + | . | gene_id | "XLOC_059995"; | transcript_id | "Novel_000758"; | exon_number | "6"; | gene_type | " |
| At_chr3 | Cufflinks | exon | 72893719 | 72894362 | . | + | . | gene_id | "XLOC_059995"; | transcript_id | "Novel_000758"; | exon_number | "7"; | gene_type | " |
| At_chr3 | Cufflinks | exon | 72884865 | 72885176 | . | + | . | gene_id | "XLOC_059995"; | transcript_id | "Novel_000759"; | exon_number | "1"; | gene_type | " |
| At_chr3 | Cufflinks | exon | 72885305 | 72885380 | . | + | . | gene_id | "XLOC_059995"; | transcript_id | "Novel_000759"; | exon_number | "2"; | gene_type | " |
| At_chr3 | Cufflinks | exon | 72886605 | 72887247 | . | + | . | gene_id | "XLOC_059995"; | transcript_id | "Novel_000759"; | exon_number | "3"; | gene_type | " |
| At_chr3 | Cufflinks | exon | 72884899 | 72885176 | . | + | . | gene_id | "XLOC_059995"; | transcript_id | "Novel_000760"; | exon_number | "1"; | gene_type | " |
| At_chr3 | Cufflinks | exon | 72885305 | 72885438 | . | + | . | gene_id | "XLOC_059995"; | transcript_id | "Novel_000760"; | exon_number | "2"; | gene_type | " |
| At_chr3 | Cufflinks | exon | 72886605 | 72887431 | . | + | . | gene_id | "XLOC_059995"; | transcript_id | "Novel_000760"; | exon_number | "3"; | gene_type | " |
| At_chr3 | Cufflinks | exon | 72888049 | 72888125 | . | + | . | gene_id | "XLOC_059995"; | transcript_id | "Novel_000760"; | exon_number | "4"; | gene_type | " |

|         |           |      |          |          |   |   |   |         |                |               |                 |             |      |           |   |
|---------|-----------|------|----------|----------|---|---|---|---------|----------------|---------------|-----------------|-------------|------|-----------|---|
| At_chr3 | Cufflinks | exon | 72888227 | 72892786 | . | + | . | gene_id | "XLOC_059995"; | transcript_id | "Novel_000760"; | exon_number | "5"; | gene_type | " |
| At_chr3 | Cufflinks | exon | 81357536 | 81357672 | . | + | . | gene_id | "XLOC_060242"; | transcript_id | "Novel_000761"; | exon_number | "1"; | gene_type | " |
| At_chr3 | Cufflinks | exon | 81357932 | 81358006 | . | + | . | gene_id | "XLOC_060242"; | transcript_id | "Novel_000761"; | exon_number | "2"; | gene_type | " |
| At_chr3 | Cufflinks | exon | 81358782 | 81358815 | . | + | . | gene_id | "XLOC_060242"; | transcript_id | "Novel_000761"; | exon_number | "3"; | gene_type | " |
| At_chr3 | Cufflinks | exon | 81358966 | 81359521 | . | + | . | gene_id | "XLOC_060242"; | transcript_id | "Novel_000761"; | exon_number | "4"; | gene_type | " |
| At_chr3 | Cufflinks | exon | 85388372 | 85388873 | . | + | . | gene_id | "XLOC_060351"; | transcript_id | "Novel_000762"; | exon_number | "1"; | gene_type | " |
| At_chr3 | Cufflinks | exon | 85388985 | 85389071 | . | + | . | gene_id | "XLOC_060351"; | transcript_id | "Novel_000762"; | exon_number | "2"; | gene_type | " |
| At_chr3 | Cufflinks | exon | 85389170 | 85391533 | . | + | . | gene_id | "XLOC_060351"; | transcript_id | "Novel_000762"; | exon_number | "3"; | gene_type | " |
| At_chr3 | Cufflinks | exon | 85391617 | 85391673 | . | + | . | gene_id | "XLOC_060351"; | transcript_id | "Novel_000762"; | exon_number | "4"; | gene_type | " |
| At_chr3 | Cufflinks | exon | 85391825 | 85392696 | . | + | . | gene_id | "XLOC_060351"; | transcript_id | "Novel_000762"; | exon_number | "5"; | gene_type | " |
| At_chr3 | Cufflinks | exon | 85710360 | 85710852 | . | + | . | gene_id | "XLOC_060369"; | transcript_id | "Novel_000763"; | exon_number | "1"; | gene_type | " |
| At_chr3 | Cufflinks | exon | 85712355 | 85712462 | . | + | . | gene_id | "XLOC_060369"; | transcript_id | "Novel_000763"; | exon_number | "2"; | gene_type | " |
| At_chr3 | Cufflinks | exon | 85712550 | 85712661 | . | + | . | gene_id | "XLOC_060369"; | transcript_id | "Novel_000763"; | exon_number | "3"; | gene_type | " |
| At_chr3 | Cufflinks | exon | 85712759 | 85712986 | . | + | . | gene_id | "XLOC_060369"; | transcript_id | "Novel_000763"; | exon_number | "4"; | gene_type | " |
| At_chr3 | Cufflinks | exon | 85713110 | 85713471 | . | + | . | gene_id | "XLOC_060369"; | transcript_id | "Novel_000763"; | exon_number | "5"; | gene_type | " |
| At_chr3 | Cufflinks | exon | 85710387 | 85712462 | . | + | . | gene_id | "XLOC_060369"; | transcript_id | "Novel_000764"; | exon_number | "1"; | gene_type | " |
| At_chr3 | Cufflinks | exon | 85712550 | 85712661 | . | + | . | gene_id | "XLOC_060369"; | transcript_id | "Novel_000764"; | exon_number | "2"; | gene_type | " |
| At_chr3 | Cufflinks | exon | 85712759 | 85712986 | . | + | . | gene_id | "XLOC_060369"; | transcript_id | "Novel_000764"; | exon_number | "3"; | gene_type | " |
| At_chr3 | Cufflinks | exon | 85713110 | 85713460 | . | + | . | gene_id | "XLOC_060369"; | transcript_id | "Novel_000764"; | exon_number | "4"; | gene_type | " |
| At_chr3 | Cufflinks | exon | 85710387 | 85712661 | . | + | . | gene_id | "XLOC_060369"; | transcript_id | "Novel_000765"; | exon_number | "1"; | gene_type | " |
| At_chr3 | Cufflinks | exon | 85712759 | 85712986 | . | + | . | gene_id | "XLOC_060369"; | transcript_id | "Novel_000765"; | exon_number | "2"; | gene_type | " |
| At_chr3 | Cufflinks | exon | 85713110 | 85713460 | . | + | . | gene_id | "XLOC_060369"; | transcript_id | "Novel_000765"; | exon_number | "3"; | gene_type | " |
| At_chr3 | Cufflinks | exon | 85929297 | 85929815 | . | + | . | gene_id | "XLOC_060395"; | transcript_id | "Novel_000766"; | exon_number | "1"; | gene_type | " |
| At_chr3 | Cufflinks | exon | 85930506 | 85930769 | . | + | . | gene_id | "XLOC_060395"; | transcript_id | "Novel_000766"; | exon_number | "2"; | gene_type | " |
| At_chr3 | Cufflinks | exon | 85930853 | 85930940 | . | + | . | gene_id | "XLOC_060395"; | transcript_id | "Novel_000766"; | exon_number | "3"; | gene_type | " |
| At_chr3 | Cufflinks | exon | 85931199 | 85931435 | . | + | . | gene_id | "XLOC_060395"; | transcript_id | "Novel_000766"; | exon_number | "4"; | gene_type | " |
| At_chr3 | Cufflinks | exon | 85931511 | 85931570 | . | + | . | gene_id | "XLOC_060395"; | transcript_id | "Novel_000766"; | exon_number | "5"; | gene_type | " |
| At_chr3 | Cufflinks | exon | 85931657 | 85931764 | . | + | . | gene_id | "XLOC_060395"; | transcript_id | "Novel_000766"; | exon_number | "6"; | gene_type | " |
| At_chr3 | Cufflinks | exon | 85931880 | 85932106 | . | + | . | gene_id | "XLOC_060395"; | transcript_id | "Novel_000766"; | exon_number | "7"; | gene_type | " |
| At_chr3 | Cufflinks | exon | 85932226 | 85932496 | . | + | . | gene_id | "XLOC_060395"; | transcript_id | "Novel_000766"; | exon_number | "8"; | gene_type | " |
| At_chr3 | Cufflinks | exon | 85929360 | 85929815 | . | + | . | gene_id | "XLOC_060395"; | transcript_id | "Novel_000767"; | exon_number | "1"; | gene_type | " |
| At_chr3 | Cufflinks | exon | 85930506 | 85930769 | . | + | . | gene_id | "XLOC_060395"; | transcript_id | "Novel_000767"; | exon_number | "2"; | gene_type | " |
| At_chr3 | Cufflinks | exon | 85930853 | 85931570 | . | + | . | gene_id | "XLOC_060395"; | transcript_id | "Novel_000767"; | exon_number | "3"; | gene_type | " |
| At_chr3 | Cufflinks | exon | 85931657 | 85931764 | . | + | . | gene_id | "XLOC_060395"; | transcript_id | "Novel_000767"; | exon_number | "4"; | gene_type | " |
| At_chr3 | Cufflinks | exon | 85931880 | 85932106 | . | + | . | gene_id | "XLOC_060395"; | transcript_id | "Novel_000767"; | exon_number | "5"; | gene_type | " |



|         |           |      |          |          |   |   |   |         |                |               |                 |             |      |           |   |
|---------|-----------|------|----------|----------|---|---|---|---------|----------------|---------------|-----------------|-------------|------|-----------|---|
| At_chr3 | Cufflinks | exon | 85932226 | 85932657 | . | + | . | gene_id | "XLOC_060395"; | transcript_id | "Novel_000767"; | exon_number | "6"; | gene_type | " |
| At_chr3 | Cufflinks | exon | 85929360 | 85929815 | . | + | . | gene_id | "XLOC_060395"; | transcript_id | "Novel_000768"; | exon_number | "1"; | gene_type | " |
| At_chr3 | Cufflinks | exon | 85930506 | 85930769 | . | + | . | gene_id | "XLOC_060395"; | transcript_id | "Novel_000768"; | exon_number | "2"; | gene_type | " |
| At_chr3 | Cufflinks | exon | 85930853 | 85930940 | . | + | . | gene_id | "XLOC_060395"; | transcript_id | "Novel_000768"; | exon_number | "3"; | gene_type | " |
| At_chr3 | Cufflinks | exon | 85931045 | 85931107 | . | + | . | gene_id | "XLOC_060395"; | transcript_id | "Novel_000768"; | exon_number | "4"; | gene_type | " |
| At_chr3 | Cufflinks | exon | 85931199 | 85931435 | . | + | . | gene_id | "XLOC_060395"; | transcript_id | "Novel_000768"; | exon_number | "5"; | gene_type | " |
| At_chr3 | Cufflinks | exon | 85931511 | 85931570 | . | + | . | gene_id | "XLOC_060395"; | transcript_id | "Novel_000768"; | exon_number | "6"; | gene_type | " |
| At_chr3 | Cufflinks | exon | 85931657 | 85931764 | . | + | . | gene_id | "XLOC_060395"; | transcript_id | "Novel_000768"; | exon_number | "7"; | gene_type | " |
| At_chr3 | Cufflinks | exon | 85931880 | 85932106 | . | + | . | gene_id | "XLOC_060395"; | transcript_id | "Novel_000768"; | exon_number | "8"; | gene_type | " |
| At_chr3 | Cufflinks | exon | 85932226 | 85932657 | . | + | . | gene_id | "XLOC_060395"; | transcript_id | "Novel_000768"; | exon_number | "9"; | gene_type | " |
| At_chr3 | Cufflinks | exon | 85931436 | 85931764 | . | + | . | gene_id | "XLOC_060395"; | transcript_id | "Novel_000769"; | exon_number | "1"; | gene_type | " |
| At_chr3 | Cufflinks | exon | 85931880 | 85932106 | . | + | . | gene_id | "XLOC_060395"; | transcript_id | "Novel_000769"; | exon_number | "2"; | gene_type | " |
| At_chr3 | Cufflinks | exon | 85932226 | 85932628 | . | + | . | gene_id | "XLOC_060395"; | transcript_id | "Novel_000769"; | exon_number | "3"; | gene_type | " |
| At_chr3 | Cufflinks | exon | 85957115 | 85958025 | . | + | . | gene_id | "XLOC_060401"; | transcript_id | "Novel_000770"; | exon_number | "1"; | gene_type | " |
| At_chr3 | Cufflinks | exon | 85958113 | 85959705 | . | + | . | gene_id | "XLOC_060401"; | transcript_id | "Novel_000770"; | exon_number | "2"; | gene_type | " |
| At_chr3 | Cufflinks | exon | 93143937 | 93144367 | . | + | . | gene_id | "XLOC_060667"; | transcript_id | "Novel_000771"; | exon_number | "1"; | gene_type | " |
| At_chr3 | Cufflinks | exon | 93144524 | 93144574 | . | + | . | gene_id | "XLOC_060667"; | transcript_id | "Novel_000771"; | exon_number | "2"; | gene_type | " |
| At_chr3 | Cufflinks | exon | 93144999 | 93145138 | . | + | . | gene_id | "XLOC_060667"; | transcript_id | "Novel_000771"; | exon_number | "3"; | gene_type | " |
| At_chr3 | Cufflinks | exon | 93145274 | 93145481 | . | + | . | gene_id | "XLOC_060667"; | transcript_id | "Novel_000771"; | exon_number | "4"; | gene_type | " |
| At_chr3 | Cufflinks | exon | 93145581 | 93145614 | . | + | . | gene_id | "XLOC_060667"; | transcript_id | "Novel_000772"; | exon_number | "1"; | gene_type | " |
| At_chr3 | Cufflinks | exon | 93145799 | 93146724 | . | + | . | gene_id | "XLOC_060667"; | transcript_id | "Novel_000772"; | exon_number | "2"; | gene_type | " |
| At_chr3 | Cufflinks | exon | 93319902 | 93320159 | . | + | . | gene_id | "XLOC_060704"; | transcript_id | "Novel_000773"; | exon_number | "1"; | gene_type | " |
| At_chr3 | Cufflinks | exon | 93454564 | 93454720 | . | + | . | gene_id | "XLOC_060728"; | transcript_id | "Novel_000774"; | exon_number | "1"; | gene_type | " |
| At_chr3 | Cufflinks | exon | 93454797 | 93454897 | . | + | . | gene_id | "XLOC_060728"; | transcript_id | "Novel_000774"; | exon_number | "2"; | gene_type | " |
| At_chr3 | Cufflinks | exon | 9071249  | 9071446  | . | - | . | gene_id | "XLOC_061288"; | transcript_id | "Novel_000775"; | exon_number | "1"; | gene_type | " |
| At_chr3 | Cufflinks | exon | 9072138  | 9072269  | . | - | . | gene_id | "XLOC_061288"; | transcript_id | "Novel_000775"; | exon_number | "2"; | gene_type | " |
| At_chr3 | Cufflinks | exon | 9073485  | 9073542  | . | - | . | gene_id | "XLOC_061288"; | transcript_id | "Novel_000775"; | exon_number | "3"; | gene_type | " |
| At_chr3 | Cufflinks | exon | 9073642  | 9073681  | . | - | . | gene_id | "XLOC_061288"; | transcript_id | "Novel_000775"; | exon_number | "4"; | gene_type | " |
| At_chr3 | Cufflinks | exon | 9073851  | 9074002  | . | - | . | gene_id | "XLOC_061288"; | transcript_id | "Novel_000775"; | exon_number | "5"; | gene_type | " |
| At_chr3 | Cufflinks | exon | 9074082  | 9074135  | . | - | . | gene_id | "XLOC_061288"; | transcript_id | "Novel_000775"; | exon_number | "6"; | gene_type | " |
| At_chr3 | Cufflinks | exon | 9074254  | 9074334  | . | - | . | gene_id | "XLOC_061288"; | transcript_id | "Novel_000775"; | exon_number | "7"; | gene_type | " |
| At_chr3 | Cufflinks | exon | 9074431  | 9074631  | . | - | . | gene_id | "XLOC_061288"; | transcript_id | "Novel_000775"; | exon_number | "8"; | gene_type | " |
| At_chr3 | Cufflinks | exon | 9418158  | 9418930  | . | - | . | gene_id | "XLOC_061303"; | transcript_id | "Novel_000776"; | exon_number | "1"; | gene_type | " |
| At_chr3 | Cufflinks | exon | 9419485  | 9419861  | . | - | . | gene_id | "XLOC_061303"; | transcript_id | "Novel_000776"; | exon_number | "2"; | gene_type | " |
| At_chr3 | Cufflinks | exon | 9419968  | 9420544  | . | - | . | gene_id | "XLOC_061303"; | transcript_id | "Novel_000776"; | exon_number | "3"; | gene_type | " |



|         |           |      |          |          |   |   |   |         |                |               |                 |             |      |           |   |
|---------|-----------|------|----------|----------|---|---|---|---------|----------------|---------------|-----------------|-------------|------|-----------|---|
| At_chr3 | Cufflinks | exon | 36523240 | 36523510 | . | - | . | gene_id | "XLOC_062501"; | transcript_id | "Novel_000785"; | exon_number | "6"; | gene_type | " |
| At_chr3 | Cufflinks | exon | 36523622 | 36523771 | . | - | . | gene_id | "XLOC_062501"; | transcript_id | "Novel_000785"; | exon_number | "7"; | gene_type | " |
| At_chr3 | Cufflinks | exon | 36523861 | 36523889 | . | - | . | gene_id | "XLOC_062501"; | transcript_id | "Novel_000785"; | exon_number | "8"; | gene_type | " |
| At_chr3 | Cufflinks | exon | 36709828 | 36710240 | . | - | . | gene_id | "XLOC_062520"; | transcript_id | "Novel_000786"; | exon_number | "1"; | gene_type | " |
| At_chr3 | Cufflinks | exon | 36710700 | 36711427 | . | - | . | gene_id | "XLOC_062520"; | transcript_id | "Novel_000786"; | exon_number | "2"; | gene_type | " |
| At_chr3 | Cufflinks | exon | 36711968 | 36712317 | . | - | . | gene_id | "XLOC_062520"; | transcript_id | "Novel_000786"; | exon_number | "3"; | gene_type | " |
| At_chr3 | Cufflinks | exon | 36709835 | 36710240 | . | - | . | gene_id | "XLOC_062520"; | transcript_id | "Novel_000787"; | exon_number | "1"; | gene_type | " |
| At_chr3 | Cufflinks | exon | 36710700 | 36710846 | . | - | . | gene_id | "XLOC_062520"; | transcript_id | "Novel_000787"; | exon_number | "2"; | gene_type | " |
| At_chr3 | Cufflinks | exon | 36710979 | 36712307 | . | - | . | gene_id | "XLOC_062520"; | transcript_id | "Novel_000787"; | exon_number | "3"; | gene_type | " |
| At_chr3 | Cufflinks | exon | 36709857 | 36710240 | . | - | . | gene_id | "XLOC_062520"; | transcript_id | "Novel_000788"; | exon_number | "1"; | gene_type | " |
| At_chr3 | Cufflinks | exon | 36710700 | 36710846 | . | - | . | gene_id | "XLOC_062520"; | transcript_id | "Novel_000788"; | exon_number | "2"; | gene_type | " |
| At_chr3 | Cufflinks | exon | 36710979 | 36711427 | . | - | . | gene_id | "XLOC_062520"; | transcript_id | "Novel_000788"; | exon_number | "3"; | gene_type | " |
| At_chr3 | Cufflinks | exon | 36711968 | 36712292 | . | - | . | gene_id | "XLOC_062520"; | transcript_id | "Novel_000788"; | exon_number | "4"; | gene_type | " |
| At_chr3 | Cufflinks | exon | 36710475 | 36711427 | . | - | . | gene_id | "XLOC_062520"; | transcript_id | "Novel_000789"; | exon_number | "1"; | gene_type | " |
| At_chr3 | Cufflinks | exon | 36711968 | 36712315 | . | - | . | gene_id | "XLOC_062520"; | transcript_id | "Novel_000789"; | exon_number | "2"; | gene_type | " |
| At_chr3 | Cufflinks | exon | 37084778 | 37085035 | . | - | . | gene_id | "XLOC_062557"; | transcript_id | "Novel_000790"; | exon_number | "1"; | gene_type | " |
| At_chr3 | Cufflinks | exon | 37085132 | 37085254 | . | - | . | gene_id | "XLOC_062557"; | transcript_id | "Novel_000790"; | exon_number | "2"; | gene_type | " |
| At_chr3 | Cufflinks | exon | 37085557 | 37085834 | . | - | . | gene_id | "XLOC_062557"; | transcript_id | "Novel_000790"; | exon_number | "3"; | gene_type | " |
| At_chr3 | Cufflinks | exon | 37093521 | 37093986 | . | - | . | gene_id | "XLOC_062558"; | transcript_id | "Novel_000791"; | exon_number | "1"; | gene_type | " |
| At_chr3 | Cufflinks | exon | 37094499 | 37094618 | . | - | . | gene_id | "XLOC_062558"; | transcript_id | "Novel_000791"; | exon_number | "2"; | gene_type | " |
| At_chr3 | Cufflinks | exon | 37095296 | 37095374 | . | - | . | gene_id | "XLOC_062558"; | transcript_id | "Novel_000791"; | exon_number | "3"; | gene_type | " |
| At_chr3 | Cufflinks | exon | 37095579 | 37095736 | . | - | . | gene_id | "XLOC_062558"; | transcript_id | "Novel_000791"; | exon_number | "4"; | gene_type | " |
| At_chr3 | Cufflinks | exon | 37095821 | 37095910 | . | - | . | gene_id | "XLOC_062558"; | transcript_id | "Novel_000791"; | exon_number | "5"; | gene_type | " |
| At_chr3 | Cufflinks | exon | 37096200 | 37096545 | . | - | . | gene_id | "XLOC_062558"; | transcript_id | "Novel_000791"; | exon_number | "6"; | gene_type | " |
| At_chr3 | Cufflinks | exon | 37093604 | 37093986 | . | - | . | gene_id | "XLOC_062558"; | transcript_id | "Novel_000792"; | exon_number | "1"; | gene_type | " |
| At_chr3 | Cufflinks | exon | 37094499 | 37094615 | . | - | . | gene_id | "XLOC_062558"; | transcript_id | "Novel_000792"; | exon_number | "2"; | gene_type | " |
| At_chr3 | Cufflinks | exon | 37095296 | 37095374 | . | - | . | gene_id | "XLOC_062558"; | transcript_id | "Novel_000792"; | exon_number | "3"; | gene_type | " |
| At_chr3 | Cufflinks | exon | 37095579 | 37095736 | . | - | . | gene_id | "XLOC_062558"; | transcript_id | "Novel_000792"; | exon_number | "4"; | gene_type | " |
| At_chr3 | Cufflinks | exon | 37095821 | 37095910 | . | - | . | gene_id | "XLOC_062558"; | transcript_id | "Novel_000792"; | exon_number | "5"; | gene_type | " |
| At_chr3 | Cufflinks | exon | 37096200 | 37096545 | . | - | . | gene_id | "XLOC_062558"; | transcript_id | "Novel_000792"; | exon_number | "6"; | gene_type | " |
| At_chr3 | Cufflinks | exon | 39783587 | 39785767 | . | - | . | gene_id | "XLOC_062707"; | transcript_id | "Novel_000793"; | exon_number | "1"; | gene_type | " |
| At_chr3 | Cufflinks | exon | 39785972 | 39786665 | . | - | . | gene_id | "XLOC_062707"; | transcript_id | "Novel_000793"; | exon_number | "2"; | gene_type | " |
| At_chr3 | Cufflinks | exon | 39811942 | 39812427 | . | - | . | gene_id | "XLOC_062714"; | transcript_id | "Novel_000794"; | exon_number | "1"; | gene_type | " |
| At_chr3 | Cufflinks | exon | 39812505 | 39812646 | . | - | . | gene_id | "XLOC_062714"; | transcript_id | "Novel_000794"; | exon_number | "2"; | gene_type | " |
| At_chr3 | Cufflinks | exon | 39813478 | 39815103 | . | - | . | gene_id | "XLOC_062714"; | transcript_id | "Novel_000794"; | exon_number | "3"; | gene_type | " |

|         |           |      |          |          |   |   |   |         |                |               |                 |             |      |           |   |
|---------|-----------|------|----------|----------|---|---|---|---------|----------------|---------------|-----------------|-------------|------|-----------|---|
| At_chr3 | Cufflinks | exon | 40541554 | 40542806 | . | - | . | gene_id | "XLOC_062787"; | transcript_id | "Novel_000795"; | exon_number | "1"; | gene_type | " |
| At_chr3 | Cufflinks | exon | 40546115 | 40546194 | . | - | . | gene_id | "XLOC_062787"; | transcript_id | "Novel_000795"; | exon_number | "2"; | gene_type | " |
| At_chr3 | Cufflinks | exon | 40547044 | 40547110 | . | - | . | gene_id | "XLOC_062787"; | transcript_id | "Novel_000795"; | exon_number | "3"; | gene_type | " |
| At_chr3 | Cufflinks | exon | 42428528 | 42428732 | . | - | . | gene_id | "XLOC_062957"; | transcript_id | "Novel_000796"; | exon_number | "1"; | gene_type | " |
| At_chr3 | Cufflinks | exon | 42429138 | 42429311 | . | - | . | gene_id | "XLOC_062957"; | transcript_id | "Novel_000796"; | exon_number | "2"; | gene_type | " |
| At_chr3 | Cufflinks | exon | 42429396 | 42429470 | . | - | . | gene_id | "XLOC_062957"; | transcript_id | "Novel_000796"; | exon_number | "3"; | gene_type | " |
| At_chr3 | Cufflinks | exon | 42429597 | 42429677 | . | - | . | gene_id | "XLOC_062957"; | transcript_id | "Novel_000796"; | exon_number | "4"; | gene_type | " |
| At_chr3 | Cufflinks | exon | 42429770 | 42429844 | . | - | . | gene_id | "XLOC_062957"; | transcript_id | "Novel_000796"; | exon_number | "5"; | gene_type | " |
| At_chr3 | Cufflinks | exon | 42429922 | 42429996 | . | - | . | gene_id | "XLOC_062957"; | transcript_id | "Novel_000796"; | exon_number | "6"; | gene_type | " |
| At_chr3 | Cufflinks | exon | 42430260 | 42430469 | . | - | . | gene_id | "XLOC_062957"; | transcript_id | "Novel_000796"; | exon_number | "7"; | gene_type | " |
| At_chr3 | Cufflinks | exon | 42431364 | 42431835 | . | - | . | gene_id | "XLOC_062957"; | transcript_id | "Novel_000796"; | exon_number | "8"; | gene_type | " |
| At_chr3 | Cufflinks | exon | 43077934 | 43078139 | . | - | . | gene_id | "XLOC_063000"; | transcript_id | "Novel_000797"; | exon_number | "1"; | gene_type | " |
| At_chr3 | Cufflinks | exon | 44026495 | 44027171 | . | - | . | gene_id | "XLOC_063104"; | transcript_id | "Novel_000798"; | exon_number | "1"; | gene_type | " |
| At_chr3 | Cufflinks | exon | 44027518 | 44027692 | . | - | . | gene_id | "XLOC_063104"; | transcript_id | "Novel_000798"; | exon_number | "2"; | gene_type | " |
| At_chr3 | Cufflinks | exon | 44027815 | 44028983 | . | - | . | gene_id | "XLOC_063104"; | transcript_id | "Novel_000798"; | exon_number | "3"; | gene_type | " |
| At_chr3 | Cufflinks | exon | 44029061 | 44029522 | . | - | . | gene_id | "XLOC_063104"; | transcript_id | "Novel_000798"; | exon_number | "4"; | gene_type | " |
| At_chr3 | Cufflinks | exon | 44026727 | 44027171 | . | - | . | gene_id | "XLOC_063104"; | transcript_id | "Novel_000799"; | exon_number | "1"; | gene_type | " |
| At_chr3 | Cufflinks | exon | 44027518 | 44029517 | . | - | . | gene_id | "XLOC_063104"; | transcript_id | "Novel_000799"; | exon_number | "2"; | gene_type | " |
| At_chr3 | Cufflinks | exon | 49091550 | 49091921 | . | - | . | gene_id | "XLOC_063364"; | transcript_id | "Novel_000800"; | exon_number | "1"; | gene_type | " |
| At_chr3 | Cufflinks | exon | 49092018 | 49092789 | . | - | . | gene_id | "XLOC_063364"; | transcript_id | "Novel_000800"; | exon_number | "2"; | gene_type | " |
| At_chr3 | Cufflinks | exon | 49091618 | 49091924 | . | - | . | gene_id | "XLOC_063364"; | transcript_id | "Novel_000801"; | exon_number | "1"; | gene_type | " |
| At_chr3 | Cufflinks | exon | 49092018 | 49092792 | . | - | . | gene_id | "XLOC_063364"; | transcript_id | "Novel_000801"; | exon_number | "2"; | gene_type | " |
| At_chr3 | Cufflinks | exon | 49091636 | 49092420 | . | - | . | gene_id | "XLOC_063364"; | transcript_id | "Novel_000802"; | exon_number | "1"; | gene_type | " |
| At_chr3 | Cufflinks | exon | 49092699 | 49092813 | . | - | . | gene_id | "XLOC_063364"; | transcript_id | "Novel_000802"; | exon_number | "2"; | gene_type | " |
| At_chr3 | Cufflinks | exon | 52074516 | 52075490 | . | - | . | gene_id | "XLOC_063490"; | transcript_id | "Novel_000803"; | exon_number | "1"; | gene_type | " |
| At_chr3 | Cufflinks | exon | 52075575 | 52076010 | . | - | . | gene_id | "XLOC_063490"; | transcript_id | "Novel_000803"; | exon_number | "2"; | gene_type | " |
| At_chr3 | Cufflinks | exon | 67131264 | 67138513 | . | - | . | gene_id | "XLOC_063967"; | transcript_id | "Novel_000804"; | exon_number | "1"; | gene_type | " |
| At_chr3 | Cufflinks | exon | 67588738 | 67588785 | . | - | . | gene_id | "XLOC_063975"; | transcript_id | "Novel_000805"; | exon_number | "1"; | gene_type | " |
| At_chr3 | Cufflinks | exon | 67588885 | 67589013 | . | - | . | gene_id | "XLOC_063975"; | transcript_id | "Novel_000805"; | exon_number | "2"; | gene_type | " |
| At_chr3 | Cufflinks | exon | 67590180 | 67590219 | . | - | . | gene_id | "XLOC_063975"; | transcript_id | "Novel_000805"; | exon_number | "3"; | gene_type | " |
| At_chr3 | Cufflinks | exon | 85669103 | 85669784 | . | - | . | gene_id | "XLOC_064577"; | transcript_id | "Novel_000806"; | exon_number | "1"; | gene_type | " |
| At_chr3 | Cufflinks | exon | 85669989 | 85670086 | . | - | . | gene_id | "XLOC_064577"; | transcript_id | "Novel_000806"; | exon_number | "2"; | gene_type | " |
| At_chr3 | Cufflinks | exon | 85670437 | 85670577 | . | - | . | gene_id | "XLOC_064577"; | transcript_id | "Novel_000806"; | exon_number | "3"; | gene_type | " |
| At_chr3 | Cufflinks | exon | 85670654 | 85670771 | . | - | . | gene_id | "XLOC_064577"; | transcript_id | "Novel_000806"; | exon_number | "4"; | gene_type | " |
| At_chr3 | Cufflinks | exon | 85670850 | 85670856 | . | - | . | gene_id | "XLOC_064577"; | transcript_id | "Novel_000806"; | exon_number | "5"; | gene_type | " |

|         |           |      |          |          |   |   |   |         |                |               |                 |             |      |           |   |
|---------|-----------|------|----------|----------|---|---|---|---------|----------------|---------------|-----------------|-------------|------|-----------|---|
| At_chr3 | Cufflinks | exon | 85896426 | 85897279 | . | - | . | gene_id | "XLOC_064601"; | transcript_id | "Novel_000807"; | exon_number | "1"; | gene_type | " |
| At_chr3 | Cufflinks | exon | 85897491 | 85897934 | . | - | . | gene_id | "XLOC_064601"; | transcript_id | "Novel_000807"; | exon_number | "2"; | gene_type | " |
| At_chr3 | Cufflinks | exon | 93303791 | 93303896 | . | - | . | gene_id | "XLOC_064856"; | transcript_id | "Novel_000808"; | exon_number | "1"; | gene_type | " |
| At_chr3 | Cufflinks | exon | 93304106 | 93304263 | . | - | . | gene_id | "XLOC_064856"; | transcript_id | "Novel_000808"; | exon_number | "2"; | gene_type | " |
| At_chr3 | Cufflinks | exon | 93468494 | 93469212 | . | - | . | gene_id | "XLOC_064875"; | transcript_id | "Novel_000809"; | exon_number | "1"; | gene_type | " |
| At_chr3 | Cufflinks | exon | 93469305 | 93469347 | . | - | . | gene_id | "XLOC_064875"; | transcript_id | "Novel_000809"; | exon_number | "2"; | gene_type | " |
| At_chr3 | Cufflinks | exon | 93469452 | 93469776 | . | - | . | gene_id | "XLOC_064875"; | transcript_id | "Novel_000809"; | exon_number | "3"; | gene_type | " |
| At_chr3 | Cufflinks | exon | 96504481 | 96506307 | . | - | . | gene_id | "XLOC_064960"; | transcript_id | "Novel_000810"; | exon_number | "1"; | gene_type | " |
| At_chr3 | Cufflinks | exon | 96506717 | 96506972 | . | - | . | gene_id | "XLOC_064960"; | transcript_id | "Novel_000810"; | exon_number | "2"; | gene_type | " |
| At_chr3 | Cufflinks | exon | 96504551 | 96506307 | . | - | . | gene_id | "XLOC_064960"; | transcript_id | "Novel_000811"; | exon_number | "1"; | gene_type | " |
| At_chr3 | Cufflinks | exon | 96506772 | 96506995 | . | - | . | gene_id | "XLOC_064960"; | transcript_id | "Novel_000811"; | exon_number | "2"; | gene_type | " |
| At_chr4 | Cufflinks | exon | 812376   | 812419   | . | + | . | gene_id | "XLOC_065134"; | transcript_id | "Novel_000812"; | exon_number | "1"; | gene_type | " |
| At_chr4 | Cufflinks | exon | 812535   | 812642   | . | + | . | gene_id | "XLOC_065134"; | transcript_id | "Novel_000812"; | exon_number | "2"; | gene_type | " |
| At_chr4 | Cufflinks | exon | 813453   | 813706   | . | + | . | gene_id | "XLOC_065134"; | transcript_id | "Novel_000812"; | exon_number | "3"; | gene_type | " |
| At_chr4 | Cufflinks | exon | 813798   | 814009   | . | + | . | gene_id | "XLOC_065134"; | transcript_id | "Novel_000812"; | exon_number | "4"; | gene_type | " |
| At_chr4 | Cufflinks | exon | 814177   | 814441   | . | + | . | gene_id | "XLOC_065134"; | transcript_id | "Novel_000812"; | exon_number | "5"; | gene_type | " |
| At_chr4 | Cufflinks | exon | 814724   | 815307   | . | + | . | gene_id | "XLOC_065134"; | transcript_id | "Novel_000812"; | exon_number | "6"; | gene_type | " |
| At_chr4 | Cufflinks | exon | 812396   | 812642   | . | + | . | gene_id | "XLOC_065134"; | transcript_id | "Novel_000813"; | exon_number | "1"; | gene_type | " |
| At_chr4 | Cufflinks | exon | 813453   | 814009   | . | + | . | gene_id | "XLOC_065134"; | transcript_id | "Novel_000813"; | exon_number | "2"; | gene_type | " |
| At_chr4 | Cufflinks | exon | 814177   | 814441   | . | + | . | gene_id | "XLOC_065134"; | transcript_id | "Novel_000813"; | exon_number | "3"; | gene_type | " |
| At_chr4 | Cufflinks | exon | 814724   | 815259   | . | + | . | gene_id | "XLOC_065134"; | transcript_id | "Novel_000813"; | exon_number | "4"; | gene_type | " |
| At_chr4 | Cufflinks | exon | 870521   | 870646   | . | + | . | gene_id | "XLOC_065144"; | transcript_id | "Novel_000814"; | exon_number | "1"; | gene_type | " |
| At_chr4 | Cufflinks | exon | 870725   | 875145   | . | + | . | gene_id | "XLOC_065144"; | transcript_id | "Novel_000814"; | exon_number | "2"; | gene_type | " |
| At_chr4 | Cufflinks | exon | 4029538  | 4029934  | . | + | . | gene_id | "XLOC_065291"; | transcript_id | "Novel_000815"; | exon_number | "1"; | gene_type | " |
| At_chr4 | Cufflinks | exon | 4030036  | 4030064  | . | + | . | gene_id | "XLOC_065291"; | transcript_id | "Novel_000815"; | exon_number | "2"; | gene_type | " |
| At_chr4 | Cufflinks | exon | 4030131  | 4030157  | . | + | . | gene_id | "XLOC_065291"; | transcript_id | "Novel_000815"; | exon_number | "3"; | gene_type | " |
| At_chr4 | Cufflinks | exon | 5344207  | 5344318  | . | + | . | gene_id | "XLOC_065435"; | transcript_id | "Novel_000816"; | exon_number | "1"; | gene_type | " |
| At_chr4 | Cufflinks | exon | 5345715  | 5346020  | . | + | . | gene_id | "XLOC_065435"; | transcript_id | "Novel_000816"; | exon_number | "2"; | gene_type | " |
| At_chr4 | Cufflinks | exon | 8353115  | 8353874  | . | + | . | gene_id | "XLOC_065534"; | transcript_id | "Novel_000817"; | exon_number | "1"; | gene_type | " |
| At_chr4 | Cufflinks | exon | 8353962  | 8354070  | . | + | . | gene_id | "XLOC_065534"; | transcript_id | "Novel_000817"; | exon_number | "2"; | gene_type | " |
| At_chr4 | Cufflinks | exon | 8355092  | 8355239  | . | + | . | gene_id | "XLOC_065534"; | transcript_id | "Novel_000817"; | exon_number | "3"; | gene_type | " |
| At_chr4 | Cufflinks | exon | 8355794  | 8356208  | . | + | . | gene_id | "XLOC_065534"; | transcript_id | "Novel_000817"; | exon_number | "4"; | gene_type | " |
| At_chr4 | Cufflinks | exon | 11567482 | 11568010 | . | + | . | gene_id | "XLOC_065578"; | transcript_id | "Novel_000818"; | exon_number | "1"; | gene_type | " |
| At_chr4 | Cufflinks | exon | 11568138 | 11568324 | . | + | . | gene_id | "XLOC_065578"; | transcript_id | "Novel_000818"; | exon_number | "2"; | gene_type | " |
| At_chr4 | Cufflinks | exon | 11573829 | 11574016 | . | + | . | gene_id | "XLOC_065578"; | transcript_id | "Novel_000818"; | exon_number | "3"; | gene_type | " |

|         |           |      |          |          |   |   |   |         |                |               |                 |             |      |           |   |
|---------|-----------|------|----------|----------|---|---|---|---------|----------------|---------------|-----------------|-------------|------|-----------|---|
| At_chr4 | Cufflinks | exon | 11574196 | 11574248 | . | + | . | gene_id | "XLOC_065578"; | transcript_id | "Novel_000818"; | exon_number | "4"; | gene_type | " |
| At_chr4 | Cufflinks | exon | 11574354 | 11574388 | . | + | . | gene_id | "XLOC_065578"; | transcript_id | "Novel_000818"; | exon_number | "5"; | gene_type | " |
| At_chr4 | Cufflinks | exon | 11575640 | 11576168 | . | + | . | gene_id | "XLOC_065578"; | transcript_id | "Novel_000818"; | exon_number | "6"; | gene_type | " |
| At_chr4 | Cufflinks | exon | 16996598 | 16996973 | . | + | . | gene_id | "XLOC_065716"; | transcript_id | "Novel_000819"; | exon_number | "1"; | gene_type | " |
| At_chr4 | Cufflinks | exon | 16997453 | 16997520 | . | + | . | gene_id | "XLOC_065716"; | transcript_id | "Novel_000819"; | exon_number | "2"; | gene_type | " |
| At_chr4 | Cufflinks | exon | 16998216 | 16998371 | . | + | . | gene_id | "XLOC_065716"; | transcript_id | "Novel_000819"; | exon_number | "3"; | gene_type | " |
| At_chr4 | Cufflinks | exon | 16998648 | 16998968 | . | + | . | gene_id | "XLOC_065716"; | transcript_id | "Novel_000819"; | exon_number | "4"; | gene_type | " |
| At_chr4 | Cufflinks | exon | 23318131 | 23319061 | . | + | . | gene_id | "XLOC_065991"; | transcript_id | "Novel_000820"; | exon_number | "1"; | gene_type | " |
| At_chr4 | Cufflinks | exon | 23319147 | 23320301 | . | + | . | gene_id | "XLOC_065991"; | transcript_id | "Novel_000820"; | exon_number | "2"; | gene_type | " |
| At_chr4 | Cufflinks | exon | 23327215 | 23327306 | . | + | . | gene_id | "XLOC_065992"; | transcript_id | "Novel_000821"; | exon_number | "1"; | gene_type | " |
| At_chr4 | Cufflinks | exon | 23327476 | 23327580 | . | + | . | gene_id | "XLOC_065992"; | transcript_id | "Novel_000821"; | exon_number | "2"; | gene_type | " |
| At_chr4 | Cufflinks | exon | 23327888 | 23327932 | . | + | . | gene_id | "XLOC_065992"; | transcript_id | "Novel_000821"; | exon_number | "3"; | gene_type | " |
| At_chr4 | Cufflinks | exon | 23328130 | 23328235 | . | + | . | gene_id | "XLOC_065992"; | transcript_id | "Novel_000822"; | exon_number | "1"; | gene_type | " |
| At_chr4 | Cufflinks | exon | 23328366 | 23328551 | . | + | . | gene_id | "XLOC_065992"; | transcript_id | "Novel_000822"; | exon_number | "2"; | gene_type | " |
| At_chr4 | Cufflinks | exon | 23328651 | 23328942 | . | + | . | gene_id | "XLOC_065992"; | transcript_id | "Novel_000822"; | exon_number | "3"; | gene_type | " |
| At_chr4 | Cufflinks | exon | 23329172 | 23329316 | . | + | . | gene_id | "XLOC_065992"; | transcript_id | "Novel_000822"; | exon_number | "4"; | gene_type | " |
| At_chr4 | Cufflinks | exon | 23329407 | 23329549 | . | + | . | gene_id | "XLOC_065992"; | transcript_id | "Novel_000822"; | exon_number | "5"; | gene_type | " |
| At_chr4 | Cufflinks | exon | 23329782 | 23330044 | . | + | . | gene_id | "XLOC_065992"; | transcript_id | "Novel_000822"; | exon_number | "6"; | gene_type | " |
| At_chr4 | Cufflinks | exon | 23330321 | 23330419 | . | + | . | gene_id | "XLOC_065992"; | transcript_id | "Novel_000822"; | exon_number | "7"; | gene_type | " |
| At_chr4 | Cufflinks | exon | 23328205 | 23328235 | . | + | . | gene_id | "XLOC_065992"; | transcript_id | "Novel_000823"; | exon_number | "1"; | gene_type | " |
| At_chr4 | Cufflinks | exon | 23328366 | 23328551 | . | + | . | gene_id | "XLOC_065992"; | transcript_id | "Novel_000823"; | exon_number | "2"; | gene_type | " |
| At_chr4 | Cufflinks | exon | 23328651 | 23328723 | . | + | . | gene_id | "XLOC_065992"; | transcript_id | "Novel_000823"; | exon_number | "3"; | gene_type | " |
| At_chr4 | Cufflinks | exon | 23328857 | 23328942 | . | + | . | gene_id | "XLOC_065992"; | transcript_id | "Novel_000823"; | exon_number | "4"; | gene_type | " |
| At_chr4 | Cufflinks | exon | 23329172 | 23329316 | . | + | . | gene_id | "XLOC_065992"; | transcript_id | "Novel_000823"; | exon_number | "5"; | gene_type | " |
| At_chr4 | Cufflinks | exon | 23329407 | 23329549 | . | + | . | gene_id | "XLOC_065992"; | transcript_id | "Novel_000823"; | exon_number | "6"; | gene_type | " |
| At_chr4 | Cufflinks | exon | 23329782 | 23330044 | . | + | . | gene_id | "XLOC_065992"; | transcript_id | "Novel_000823"; | exon_number | "7"; | gene_type | " |
| At_chr4 | Cufflinks | exon | 23330321 | 23330555 | . | + | . | gene_id | "XLOC_065992"; | transcript_id | "Novel_000823"; | exon_number | "8"; | gene_type | " |
| At_chr4 | Cufflinks | exon | 23384420 | 23384820 | . | + | . | gene_id | "XLOC_066012"; | transcript_id | "Novel_000824"; | exon_number | "1"; | gene_type | " |
| At_chr4 | Cufflinks | exon | 23385222 | 23385263 | . | + | . | gene_id | "XLOC_066012"; | transcript_id | "Novel_000824"; | exon_number | "2"; | gene_type | " |
| At_chr4 | Cufflinks | exon | 23385029 | 23385614 | . | + | . | gene_id | "XLOC_066012"; | transcript_id | "Novel_000825"; | exon_number | "1"; | gene_type | " |
| At_chr4 | Cufflinks | exon | 23385745 | 23385849 | . | + | . | gene_id | "XLOC_066012"; | transcript_id | "Novel_000825"; | exon_number | "2"; | gene_type | " |
| At_chr4 | Cufflinks | exon | 23386059 | 23386113 | . | + | . | gene_id | "XLOC_066012"; | transcript_id | "Novel_000825"; | exon_number | "3"; | gene_type | " |
| At_chr4 | Cufflinks | exon | 23386556 | 23386666 | . | + | . | gene_id | "XLOC_066012"; | transcript_id | "Novel_000825"; | exon_number | "4"; | gene_type | " |
| At_chr4 | Cufflinks | exon | 23386750 | 23386800 | . | + | . | gene_id | "XLOC_066012"; | transcript_id | "Novel_000825"; | exon_number | "5"; | gene_type | " |
| At_chr4 | Cufflinks | exon | 23387270 | 23387445 | . | + | . | gene_id | "XLOC_066012"; | transcript_id | "Novel_000825"; | exon_number | "6"; | gene_type | " |



|         |           |      |          |          |   |   |   |         |                |               |                 |             |       |           |   |
|---------|-----------|------|----------|----------|---|---|---|---------|----------------|---------------|-----------------|-------------|-------|-----------|---|
| At_chr4 | Cufflinks | exon | 23408904 | 23408975 | . | + | . | gene_id | "XLOC_066016"; | transcript_id | "Novel_000831"; | exon_number | "4";  | gene_type | " |
| At_chr4 | Cufflinks | exon | 23409091 | 23409228 | . | + | . | gene_id | "XLOC_066016"; | transcript_id | "Novel_000831"; | exon_number | "5";  | gene_type | " |
| At_chr4 | Cufflinks | exon | 23409506 | 23409539 | . | + | . | gene_id | "XLOC_066016"; | transcript_id | "Novel_000831"; | exon_number | "6";  | gene_type | " |
| At_chr4 | Cufflinks | exon | 23410098 | 23410207 | . | + | . | gene_id | "XLOC_066016"; | transcript_id | "Novel_000831"; | exon_number | "7";  | gene_type | " |
| At_chr4 | Cufflinks | exon | 23410356 | 23410442 | . | + | . | gene_id | "XLOC_066016"; | transcript_id | "Novel_000831"; | exon_number | "8";  | gene_type | " |
| At_chr4 | Cufflinks | exon | 23410581 | 23410664 | . | + | . | gene_id | "XLOC_066016"; | transcript_id | "Novel_000831"; | exon_number | "9";  | gene_type | " |
| At_chr4 | Cufflinks | exon | 23410755 | 23410820 | . | + | . | gene_id | "XLOC_066016"; | transcript_id | "Novel_000831"; | exon_number | "10"; | gene_type | " |
| At_chr4 | Cufflinks | exon | 23410973 | 23411907 | . | + | . | gene_id | "XLOC_066016"; | transcript_id | "Novel_000831"; | exon_number | "11"; | gene_type | " |
| At_chr4 | Cufflinks | exon | 23407866 | 23408207 | . | + | . | gene_id | "XLOC_066016"; | transcript_id | "Novel_000832"; | exon_number | "1";  | gene_type | " |
| At_chr4 | Cufflinks | exon | 23408410 | 23408524 | . | + | . | gene_id | "XLOC_066016"; | transcript_id | "Novel_000832"; | exon_number | "2";  | gene_type | " |
| At_chr4 | Cufflinks | exon | 23408717 | 23408791 | . | + | . | gene_id | "XLOC_066016"; | transcript_id | "Novel_000832"; | exon_number | "3";  | gene_type | " |
| At_chr4 | Cufflinks | exon | 23408904 | 23408975 | . | + | . | gene_id | "XLOC_066016"; | transcript_id | "Novel_000832"; | exon_number | "4";  | gene_type | " |
| At_chr4 | Cufflinks | exon | 23409091 | 23409228 | . | + | . | gene_id | "XLOC_066016"; | transcript_id | "Novel_000832"; | exon_number | "5";  | gene_type | " |
| At_chr4 | Cufflinks | exon | 23409506 | 23409539 | . | + | . | gene_id | "XLOC_066016"; | transcript_id | "Novel_000832"; | exon_number | "6";  | gene_type | " |
| At_chr4 | Cufflinks | exon | 23410098 | 23410207 | . | + | . | gene_id | "XLOC_066016"; | transcript_id | "Novel_000832"; | exon_number | "7";  | gene_type | " |
| At_chr4 | Cufflinks | exon | 23410356 | 23410442 | . | + | . | gene_id | "XLOC_066016"; | transcript_id | "Novel_000832"; | exon_number | "8";  | gene_type | " |
| At_chr4 | Cufflinks | exon | 23410581 | 23410664 | . | + | . | gene_id | "XLOC_066016"; | transcript_id | "Novel_000832"; | exon_number | "9";  | gene_type | " |
| At_chr4 | Cufflinks | exon | 23410755 | 23410820 | . | + | . | gene_id | "XLOC_066016"; | transcript_id | "Novel_000832"; | exon_number | "10"; | gene_type | " |
| At_chr4 | Cufflinks | exon | 23410973 | 23411099 | . | + | . | gene_id | "XLOC_066016"; | transcript_id | "Novel_000832"; | exon_number | "11"; | gene_type | " |
| At_chr4 | Cufflinks | exon | 23411215 | 23411717 | . | + | . | gene_id | "XLOC_066016"; | transcript_id | "Novel_000832"; | exon_number | "12"; | gene_type | " |
| At_chr4 | Cufflinks | exon | 23445543 | 23446019 | . | + | . | gene_id | "XLOC_066027"; | transcript_id | "Novel_000833"; | exon_number | "1";  | gene_type | " |
| At_chr4 | Cufflinks | exon | 23447058 | 23447365 | . | + | . | gene_id | "XLOC_066027"; | transcript_id | "Novel_000833"; | exon_number | "2";  | gene_type | " |
| At_chr4 | Cufflinks | exon | 23447457 | 23447589 | . | + | . | gene_id | "XLOC_066027"; | transcript_id | "Novel_000833"; | exon_number | "3";  | gene_type | " |
| At_chr4 | Cufflinks | exon | 23447739 | 23448212 | . | + | . | gene_id | "XLOC_066027"; | transcript_id | "Novel_000833"; | exon_number | "4";  | gene_type | " |
| At_chr4 | Cufflinks | exon | 36590065 | 36590102 | . | + | . | gene_id | "XLOC_066439"; | transcript_id | "Novel_000834"; | exon_number | "1";  | gene_type | " |
| At_chr4 | Cufflinks | exon | 36590238 | 36590304 | . | + | . | gene_id | "XLOC_066439"; | transcript_id | "Novel_000834"; | exon_number | "2";  | gene_type | " |
| At_chr4 | Cufflinks | exon | 36590980 | 36591135 | . | + | . | gene_id | "XLOC_066439"; | transcript_id | "Novel_000834"; | exon_number | "3";  | gene_type | " |
| At_chr4 | Cufflinks | exon | 37752484 | 37752703 | . | + | . | gene_id | "XLOC_066610"; | transcript_id | "Novel_000835"; | exon_number | "1";  | gene_type | " |
| At_chr4 | Cufflinks | exon | 37753162 | 37753459 | . | + | . | gene_id | "XLOC_066610"; | transcript_id | "Novel_000835"; | exon_number | "2";  | gene_type | " |
| At_chr4 | Cufflinks | exon | 37754272 | 37754400 | . | + | . | gene_id | "XLOC_066610"; | transcript_id | "Novel_000835"; | exon_number | "3";  | gene_type | " |
| At_chr4 | Cufflinks | exon | 37755392 | 37755484 | . | + | . | gene_id | "XLOC_066610"; | transcript_id | "Novel_000835"; | exon_number | "4";  | gene_type | " |
| At_chr4 | Cufflinks | exon | 37755596 | 37755736 | . | + | . | gene_id | "XLOC_066610"; | transcript_id | "Novel_000835"; | exon_number | "5";  | gene_type | " |
| At_chr4 | Cufflinks | exon | 37756007 | 37756075 | . | + | . | gene_id | "XLOC_066610"; | transcript_id | "Novel_000835"; | exon_number | "6";  | gene_type | " |
| At_chr4 | Cufflinks | exon | 37756385 | 37756468 | . | + | . | gene_id | "XLOC_066610"; | transcript_id | "Novel_000835"; | exon_number | "7";  | gene_type | " |
| At_chr4 | Cufflinks | exon | 37756720 | 37756900 | . | + | . | gene_id | "XLOC_066610"; | transcript_id | "Novel_000835"; | exon_number | "8";  | gene_type | " |



|         |           |      |          |          |   |   |   |         |                |               |                 |             |      |           |   |
|---------|-----------|------|----------|----------|---|---|---|---------|----------------|---------------|-----------------|-------------|------|-----------|---|
| At_chr4 | Cufflinks | exon | 37757749 | 37757783 | . | + | . | gene_id | "XLOC_066610"; | transcript_id | "Novel_000835"; | exon_number | "9"; | gene_type | " |
| At_chr4 | Cufflinks | exon | 37752538 | 37752703 | . | + | . | gene_id | "XLOC_066610"; | transcript_id | "Novel_000836"; | exon_number | "1"; | gene_type | " |
| At_chr4 | Cufflinks | exon | 37753168 | 37753459 | . | + | . | gene_id | "XLOC_066610"; | transcript_id | "Novel_000836"; | exon_number | "2"; | gene_type | " |
| At_chr4 | Cufflinks | exon | 37754272 | 37754400 | . | + | . | gene_id | "XLOC_066610"; | transcript_id | "Novel_000836"; | exon_number | "3"; | gene_type | " |
| At_chr4 | Cufflinks | exon | 37755392 | 37755484 | . | + | . | gene_id | "XLOC_066610"; | transcript_id | "Novel_000836"; | exon_number | "4"; | gene_type | " |
| At_chr4 | Cufflinks | exon | 37755596 | 37755736 | . | + | . | gene_id | "XLOC_066610"; | transcript_id | "Novel_000836"; | exon_number | "5"; | gene_type | " |
| At_chr4 | Cufflinks | exon | 37756007 | 37756075 | . | + | . | gene_id | "XLOC_066610"; | transcript_id | "Novel_000836"; | exon_number | "6"; | gene_type | " |
| At_chr4 | Cufflinks | exon | 37756385 | 37756468 | . | + | . | gene_id | "XLOC_066610"; | transcript_id | "Novel_000836"; | exon_number | "7"; | gene_type | " |
| At_chr4 | Cufflinks | exon | 37756720 | 37757252 | . | + | . | gene_id | "XLOC_066610"; | transcript_id | "Novel_000836"; | exon_number | "8"; | gene_type | " |
| At_chr4 | Cufflinks | exon | 37758261 | 37758651 | . | + | . | gene_id | "XLOC_066610"; | transcript_id | "Novel_000837"; | exon_number | "1"; | gene_type | " |
| At_chr4 | Cufflinks | exon | 37758958 | 37759107 | . | + | . | gene_id | "XLOC_066610"; | transcript_id | "Novel_000837"; | exon_number | "2"; | gene_type | " |
| At_chr4 | Cufflinks | exon | 37759229 | 37760020 | . | + | . | gene_id | "XLOC_066610"; | transcript_id | "Novel_000837"; | exon_number | "3"; | gene_type | " |
| At_chr4 | Cufflinks | exon | 37758676 | 37759107 | . | + | . | gene_id | "XLOC_066610"; | transcript_id | "Novel_000838"; | exon_number | "1"; | gene_type | " |
| At_chr4 | Cufflinks | exon | 37759229 | 37760032 | . | + | . | gene_id | "XLOC_066610"; | transcript_id | "Novel_000838"; | exon_number | "2"; | gene_type | " |
| At_chr4 | Cufflinks | exon | 37782391 | 37782581 | . | + | . | gene_id | "XLOC_066615"; | transcript_id | "Novel_000839"; | exon_number | "1"; | gene_type | " |
| At_chr4 | Cufflinks | exon | 37782667 | 37782723 | . | + | . | gene_id | "XLOC_066615"; | transcript_id | "Novel_000839"; | exon_number | "2"; | gene_type | " |
| At_chr4 | Cufflinks | exon | 37782834 | 37782919 | . | + | . | gene_id | "XLOC_066615"; | transcript_id | "Novel_000839"; | exon_number | "3"; | gene_type | " |
| At_chr4 | Cufflinks | exon | 37782988 | 37783187 | . | + | . | gene_id | "XLOC_066615"; | transcript_id | "Novel_000839"; | exon_number | "4"; | gene_type | " |
| At_chr4 | Cufflinks | exon | 45929518 | 45929584 | . | + | . | gene_id | "XLOC_066938"; | transcript_id | "Novel_000840"; | exon_number | "1"; | gene_type | " |
| At_chr4 | Cufflinks | exon | 45930559 | 45930922 | . | + | . | gene_id | "XLOC_066938"; | transcript_id | "Novel_000840"; | exon_number | "2"; | gene_type | " |
| At_chr4 | Cufflinks | exon | 45931146 | 45933519 | . | + | . | gene_id | "XLOC_066938"; | transcript_id | "Novel_000840"; | exon_number | "3"; | gene_type | " |
| At_chr4 | Cufflinks | exon | 50040054 | 50040408 | . | + | . | gene_id | "XLOC_067048"; | transcript_id | "Novel_000841"; | exon_number | "1"; | gene_type | " |
| At_chr4 | Cufflinks | exon | 50041141 | 50041413 | . | + | . | gene_id | "XLOC_067048"; | transcript_id | "Novel_000841"; | exon_number | "2"; | gene_type | " |
| At_chr4 | Cufflinks | exon | 50046022 | 50046113 | . | + | . | gene_id | "XLOC_067048"; | transcript_id | "Novel_000841"; | exon_number | "3"; | gene_type | " |
| At_chr4 | Cufflinks | exon | 50046309 | 50046535 | . | + | . | gene_id | "XLOC_067048"; | transcript_id | "Novel_000841"; | exon_number | "4"; | gene_type | " |
| At_chr4 | Cufflinks | exon | 50046796 | 50046839 | . | + | . | gene_id | "XLOC_067048"; | transcript_id | "Novel_000841"; | exon_number | "5"; | gene_type | " |
| At_chr4 | Cufflinks | exon | 50040066 | 50040408 | . | + | . | gene_id | "XLOC_067048"; | transcript_id | "Novel_000842"; | exon_number | "1"; | gene_type | " |
| At_chr4 | Cufflinks | exon | 50041141 | 50041276 | . | + | . | gene_id | "XLOC_067048"; | transcript_id | "Novel_000842"; | exon_number | "2"; | gene_type | " |
| At_chr4 | Cufflinks | exon | 50041360 | 50041923 | . | + | . | gene_id | "XLOC_067048"; | transcript_id | "Novel_000842"; | exon_number | "3"; | gene_type | " |
| At_chr4 | Cufflinks | exon | 50040066 | 50040408 | . | + | . | gene_id | "XLOC_067048"; | transcript_id | "Novel_000843"; | exon_number | "1"; | gene_type | " |
| At_chr4 | Cufflinks | exon | 50041141 | 50041276 | . | + | . | gene_id | "XLOC_067048"; | transcript_id | "Novel_000843"; | exon_number | "2"; | gene_type | " |
| At_chr4 | Cufflinks | exon | 50041360 | 50041413 | . | + | . | gene_id | "XLOC_067048"; | transcript_id | "Novel_000843"; | exon_number | "3"; | gene_type | " |
| At_chr4 | Cufflinks | exon | 50046022 | 50046113 | . | + | . | gene_id | "XLOC_067048"; | transcript_id | "Novel_000843"; | exon_number | "4"; | gene_type | " |
| At_chr4 | Cufflinks | exon | 50046309 | 50046535 | . | + | . | gene_id | "XLOC_067048"; | transcript_id | "Novel_000843"; | exon_number | "5"; | gene_type | " |
| At_chr4 | Cufflinks | exon | 50046796 | 50046842 | . | + | . | gene_id | "XLOC_067048"; | transcript_id | "Novel_000843"; | exon_number | "6"; | gene_type | " |

|         |           |      |          |          |   |   |   |         |                |               |                 |             |      |           |   |
|---------|-----------|------|----------|----------|---|---|---|---------|----------------|---------------|-----------------|-------------|------|-----------|---|
| At_chr4 | Cufflinks | exon | 50040699 | 50041276 | . | + | . | gene_id | "XLOC_067048"; | transcript_id | "Novel_000844"; | exon_number | "1"; | gene_type | " |
| At_chr4 | Cufflinks | exon | 50041360 | 50041888 | . | + | . | gene_id | "XLOC_067048"; | transcript_id | "Novel_000844"; | exon_number | "2"; | gene_type | " |
| At_chr4 | Cufflinks | exon | 50046003 | 50046113 | . | + | . | gene_id | "XLOC_067048"; | transcript_id | "Novel_000845"; | exon_number | "1"; | gene_type | " |
| At_chr4 | Cufflinks | exon | 50046309 | 50046535 | . | + | . | gene_id | "XLOC_067048"; | transcript_id | "Novel_000845"; | exon_number | "2"; | gene_type | " |
| At_chr4 | Cufflinks | exon | 50046796 | 50046842 | . | + | . | gene_id | "XLOC_067048"; | transcript_id | "Novel_000845"; | exon_number | "3"; | gene_type | " |
| At_chr4 | Cufflinks | exon | 51133572 | 51134283 | . | + | . | gene_id | "XLOC_067086"; | transcript_id | "Novel_000846"; | exon_number | "1"; | gene_type | " |
| At_chr4 | Cufflinks | exon | 60805838 | 60806253 | . | + | . | gene_id | "XLOC_067298"; | transcript_id | "Novel_000847"; | exon_number | "1"; | gene_type | " |
| At_chr4 | Cufflinks | exon | 60806591 | 60806691 | . | + | . | gene_id | "XLOC_067298"; | transcript_id | "Novel_000847"; | exon_number | "2"; | gene_type | " |
| At_chr4 | Cufflinks | exon | 60806968 | 60807051 | . | + | . | gene_id | "XLOC_067298"; | transcript_id | "Novel_000847"; | exon_number | "3"; | gene_type | " |
| At_chr4 | Cufflinks | exon | 60807498 | 60807698 | . | + | . | gene_id | "XLOC_067298"; | transcript_id | "Novel_000848"; | exon_number | "1"; | gene_type | " |
| At_chr4 | Cufflinks | exon | 60808137 | 60808226 | . | + | . | gene_id | "XLOC_067298"; | transcript_id | "Novel_000848"; | exon_number | "2"; | gene_type | " |
| At_chr4 | Cufflinks | exon | 65427180 | 65427566 | . | + | . | gene_id | "XLOC_067470"; | transcript_id | "Novel_000849"; | exon_number | "1"; | gene_type | " |
| At_chr4 | Cufflinks | exon | 65427936 | 65428292 | . | + | . | gene_id | "XLOC_067470"; | transcript_id | "Novel_000849"; | exon_number | "2"; | gene_type | " |
| At_chr4 | Cufflinks | exon | 66615484 | 66615704 | . | + | . | gene_id | "XLOC_067534"; | transcript_id | "Novel_000850"; | exon_number | "1"; | gene_type | " |
| At_chr4 | Cufflinks | exon | 78237759 | 78238040 | . | + | . | gene_id | "XLOC_067937"; | transcript_id | "Novel_000851"; | exon_number | "1"; | gene_type | " |
| At_chr4 | Cufflinks | exon | 78238368 | 78239773 | . | + | . | gene_id | "XLOC_067937"; | transcript_id | "Novel_000851"; | exon_number | "2"; | gene_type | " |
| At_chr4 | Cufflinks | exon | 81895019 | 81895408 | . | + | . | gene_id | "XLOC_068048"; | transcript_id | "Novel_000852"; | exon_number | "1"; | gene_type | " |
| At_chr4 | Cufflinks | exon | 81895504 | 81895714 | . | + | . | gene_id | "XLOC_068048"; | transcript_id | "Novel_000852"; | exon_number | "2"; | gene_type | " |
| At_chr4 | Cufflinks | exon | 81895845 | 81896014 | . | + | . | gene_id | "XLOC_068048"; | transcript_id | "Novel_000852"; | exon_number | "3"; | gene_type | " |
| At_chr4 | Cufflinks | exon | 81896119 | 81897208 | . | + | . | gene_id | "XLOC_068048"; | transcript_id | "Novel_000852"; | exon_number | "4"; | gene_type | " |
| At_chr4 | Cufflinks | exon | 81895029 | 81896014 | . | + | . | gene_id | "XLOC_068048"; | transcript_id | "Novel_000853"; | exon_number | "1"; | gene_type | " |
| At_chr4 | Cufflinks | exon | 81896119 | 81896447 | . | + | . | gene_id | "XLOC_068048"; | transcript_id | "Novel_000853"; | exon_number | "2"; | gene_type | " |
| At_chr4 | Cufflinks | exon | 83661564 | 83661725 | . | + | . | gene_id | "XLOC_068102"; | transcript_id | "Novel_000854"; | exon_number | "1"; | gene_type | " |
| At_chr4 | Cufflinks | exon | 83662500 | 83662857 | . | + | . | gene_id | "XLOC_068102"; | transcript_id | "Novel_000854"; | exon_number | "2"; | gene_type | " |
| At_chr4 | Cufflinks | exon | 84012743 | 84013100 | . | + | . | gene_id | "XLOC_068145"; | transcript_id | "Novel_000855"; | exon_number | "1"; | gene_type | " |
| At_chr4 | Cufflinks | exon | 84013427 | 84013588 | . | + | . | gene_id | "XLOC_068145"; | transcript_id | "Novel_000855"; | exon_number | "2"; | gene_type | " |
| At_chr4 | Cufflinks | exon | 84015115 | 84015149 | . | + | . | gene_id | "XLOC_068145"; | transcript_id | "Novel_000856"; | exon_number | "1"; | gene_type | " |
| At_chr4 | Cufflinks | exon | 84015602 | 84015652 | . | + | . | gene_id | "XLOC_068145"; | transcript_id | "Novel_000856"; | exon_number | "2"; | gene_type | " |
| At_chr4 | Cufflinks | exon | 84015745 | 84015807 | . | + | . | gene_id | "XLOC_068145"; | transcript_id | "Novel_000856"; | exon_number | "3"; | gene_type | " |
| At_chr4 | Cufflinks | exon | 84015911 | 84015957 | . | + | . | gene_id | "XLOC_068145"; | transcript_id | "Novel_000856"; | exon_number | "4"; | gene_type | " |
| At_chr4 | Cufflinks | exon | 84016306 | 84016375 | . | + | . | gene_id | "XLOC_068145"; | transcript_id | "Novel_000856"; | exon_number | "5"; | gene_type | " |
| At_chr4 | Cufflinks | exon | 84016464 | 84016631 | . | + | . | gene_id | "XLOC_068145"; | transcript_id | "Novel_000856"; | exon_number | "6"; | gene_type | " |
| At_chr4 | Cufflinks | exon | 84345061 | 84345210 | . | + | . | gene_id | "XLOC_068167"; | transcript_id | "Novel_000857"; | exon_number | "1"; | gene_type | " |
| At_chr4 | Cufflinks | exon | 84345586 | 84345772 | . | + | . | gene_id | "XLOC_068167"; | transcript_id | "Novel_000857"; | exon_number | "2"; | gene_type | " |
| At_chr4 | Cufflinks | exon | 84346363 | 84346516 | . | + | . | gene_id | "XLOC_068167"; | transcript_id | "Novel_000857"; | exon_number | "3"; | gene_type | " |

|         |           |      |          |          |   |   |   |         |                |               |                 |             |      |           |   |
|---------|-----------|------|----------|----------|---|---|---|---------|----------------|---------------|-----------------|-------------|------|-----------|---|
| At_chr4 | Cufflinks | exon | 84346655 | 84346692 | . | + | . | gene_id | "XLOC_068167"; | transcript_id | "Novel_000857"; | exon_number | "4"; | gene_type | " |
| At_chr4 | Cufflinks | exon | 84346787 | 84346856 | . | + | . | gene_id | "XLOC_068167"; | transcript_id | "Novel_000857"; | exon_number | "5"; | gene_type | " |
| At_chr4 | Cufflinks | exon | 84346936 | 84347311 | . | + | . | gene_id | "XLOC_068167"; | transcript_id | "Novel_000857"; | exon_number | "6"; | gene_type | " |
| At_chr4 | Cufflinks | exon | 84346360 | 84346516 | . | + | . | gene_id | "XLOC_068167"; | transcript_id | "Novel_000858"; | exon_number | "1"; | gene_type | " |
| At_chr4 | Cufflinks | exon | 84346655 | 84346692 | . | + | . | gene_id | "XLOC_068167"; | transcript_id | "Novel_000858"; | exon_number | "2"; | gene_type | " |
| At_chr4 | Cufflinks | exon | 84346787 | 84346856 | . | + | . | gene_id | "XLOC_068167"; | transcript_id | "Novel_000858"; | exon_number | "3"; | gene_type | " |
| At_chr4 | Cufflinks | exon | 84346936 | 84347256 | . | + | . | gene_id | "XLOC_068167"; | transcript_id | "Novel_000858"; | exon_number | "4"; | gene_type | " |
| At_chr4 | Cufflinks | exon | 84647858 | 84648188 | . | + | . | gene_id | "XLOC_068203"; | transcript_id | "Novel_000859"; | exon_number | "1"; | gene_type | " |
| At_chr4 | Cufflinks | exon | 84648308 | 84648510 | . | + | . | gene_id | "XLOC_068203"; | transcript_id | "Novel_000859"; | exon_number | "2"; | gene_type | " |
| At_chr4 | Cufflinks | exon | 84712248 | 84712299 | . | + | . | gene_id | "XLOC_068222"; | transcript_id | "Novel_000860"; | exon_number | "1"; | gene_type | " |
| At_chr4 | Cufflinks | exon | 84712919 | 84713008 | . | + | . | gene_id | "XLOC_068222"; | transcript_id | "Novel_000860"; | exon_number | "2"; | gene_type | " |
| At_chr4 | Cufflinks | exon | 84713602 | 84713661 | . | + | . | gene_id | "XLOC_068222"; | transcript_id | "Novel_000860"; | exon_number | "3"; | gene_type | " |
| At_chr4 | Cufflinks | exon | 84713745 | 84713838 | . | + | . | gene_id | "XLOC_068222"; | transcript_id | "Novel_000860"; | exon_number | "4"; | gene_type | " |
| At_chr4 | Cufflinks | exon | 84722444 | 84722498 | . | + | . | gene_id | "XLOC_068223"; | transcript_id | "Novel_000861"; | exon_number | "1"; | gene_type | " |
| At_chr4 | Cufflinks | exon | 84722631 | 84722684 | . | + | . | gene_id | "XLOC_068223"; | transcript_id | "Novel_000861"; | exon_number | "2"; | gene_type | " |
| At_chr4 | Cufflinks | exon | 84722747 | 84722806 | . | + | . | gene_id | "XLOC_068223"; | transcript_id | "Novel_000861"; | exon_number | "3"; | gene_type | " |
| At_chr4 | Cufflinks | exon | 84722886 | 84722927 | . | + | . | gene_id | "XLOC_068223"; | transcript_id | "Novel_000861"; | exon_number | "4"; | gene_type | " |
| At_chr4 | Cufflinks | exon | 84746282 | 84746901 | . | + | . | gene_id | "XLOC_068229"; | transcript_id | "Novel_000862"; | exon_number | "1"; | gene_type | " |
| At_chr4 | Cufflinks | exon | 84748035 | 84748145 | . | + | . | gene_id | "XLOC_068229"; | transcript_id | "Novel_000862"; | exon_number | "2"; | gene_type | " |
| At_chr4 | Cufflinks | exon | 84748480 | 84748827 | . | + | . | gene_id | "XLOC_068229"; | transcript_id | "Novel_000862"; | exon_number | "3"; | gene_type | " |
| At_chr4 | Cufflinks | exon | 84749043 | 84749362 | . | + | . | gene_id | "XLOC_068229"; | transcript_id | "Novel_000862"; | exon_number | "4"; | gene_type | " |
| At_chr4 | Cufflinks | exon | 84749467 | 84749558 | . | + | . | gene_id | "XLOC_068229"; | transcript_id | "Novel_000862"; | exon_number | "5"; | gene_type | " |
| At_chr4 | Cufflinks | exon | 84750327 | 84750687 | . | + | . | gene_id | "XLOC_068229"; | transcript_id | "Novel_000862"; | exon_number | "6"; | gene_type | " |
| At_chr4 | Cufflinks | exon | 84751148 | 84751517 | . | + | . | gene_id | "XLOC_068229"; | transcript_id | "Novel_000862"; | exon_number | "7"; | gene_type | " |
| At_chr4 | Cufflinks | exon | 84746365 | 84746901 | . | + | . | gene_id | "XLOC_068229"; | transcript_id | "Novel_000863"; | exon_number | "1"; | gene_type | " |
| At_chr4 | Cufflinks | exon | 84748035 | 84748145 | . | + | . | gene_id | "XLOC_068229"; | transcript_id | "Novel_000863"; | exon_number | "2"; | gene_type | " |
| At_chr4 | Cufflinks | exon | 84748480 | 84748827 | . | + | . | gene_id | "XLOC_068229"; | transcript_id | "Novel_000863"; | exon_number | "3"; | gene_type | " |
| At_chr4 | Cufflinks | exon | 84749043 | 84749362 | . | + | . | gene_id | "XLOC_068229"; | transcript_id | "Novel_000863"; | exon_number | "4"; | gene_type | " |
| At_chr4 | Cufflinks | exon | 84749467 | 84749558 | . | + | . | gene_id | "XLOC_068229"; | transcript_id | "Novel_000863"; | exon_number | "5"; | gene_type | " |
| At_chr4 | Cufflinks | exon | 84750327 | 84750687 | . | + | . | gene_id | "XLOC_068229"; | transcript_id | "Novel_000863"; | exon_number | "6"; | gene_type | " |
| At_chr4 | Cufflinks | exon | 84751148 | 84751355 | . | + | . | gene_id | "XLOC_068229"; | transcript_id | "Novel_000863"; | exon_number | "7"; | gene_type | " |
| At_chr4 | Cufflinks | exon | 84752271 | 84752440 | . | + | . | gene_id | "XLOC_068229"; | transcript_id | "Novel_000863"; | exon_number | "8"; | gene_type | " |
| At_chr4 | Cufflinks | exon | 85281577 | 85281867 | . | + | . | gene_id | "XLOC_068282"; | transcript_id | "Novel_000864"; | exon_number | "1"; | gene_type | " |
| At_chr4 | Cufflinks | exon | 85281996 | 85282116 | . | + | . | gene_id | "XLOC_068282"; | transcript_id | "Novel_000864"; | exon_number | "2"; | gene_type | " |
| At_chr4 | Cufflinks | exon | 85281577 | 85281867 | . | + | . | gene_id | "XLOC_068282"; | transcript_id | "Novel_000865"; | exon_number | "1"; | gene_type | " |

|         |           |      |          |          |   |   |   |         |                |               |                 |             |       |           |   |
|---------|-----------|------|----------|----------|---|---|---|---------|----------------|---------------|-----------------|-------------|-------|-----------|---|
| At_chr4 | Cufflinks | exon | 85281996 | 85282114 | . | + | . | gene_id | "XLOC_068282"; | transcript_id | "Novel_000865"; | exon_number | "2";  | gene_type | " |
| At_chr4 | Cufflinks | exon | 85282879 | 85283311 | . | + | . | gene_id | "XLOC_068282"; | transcript_id | "Novel_000865"; | exon_number | "3";  | gene_type | " |
| At_chr4 | Cufflinks | exon | 85283444 | 85283704 | . | + | . | gene_id | "XLOC_068282"; | transcript_id | "Novel_000865"; | exon_number | "4";  | gene_type | " |
| At_chr4 | Cufflinks | exon | 85284257 | 85284379 | . | + | . | gene_id | "XLOC_068282"; | transcript_id | "Novel_000865"; | exon_number | "5";  | gene_type | " |
| At_chr4 | Cufflinks | exon | 85284561 | 85284659 | . | + | . | gene_id | "XLOC_068282"; | transcript_id | "Novel_000865"; | exon_number | "6";  | gene_type | " |
| At_chr4 | Cufflinks | exon | 85284750 | 85285216 | . | + | . | gene_id | "XLOC_068282"; | transcript_id | "Novel_000865"; | exon_number | "7";  | gene_type | " |
| At_chr4 | Cufflinks | exon | 85282228 | 85283311 | . | + | . | gene_id | "XLOC_068282"; | transcript_id | "Novel_000866"; | exon_number | "1";  | gene_type | " |
| At_chr4 | Cufflinks | exon | 85283444 | 85283704 | . | + | . | gene_id | "XLOC_068282"; | transcript_id | "Novel_000866"; | exon_number | "2";  | gene_type | " |
| At_chr4 | Cufflinks | exon | 85284257 | 85284379 | . | + | . | gene_id | "XLOC_068282"; | transcript_id | "Novel_000866"; | exon_number | "3";  | gene_type | " |
| At_chr4 | Cufflinks | exon | 85284561 | 85285170 | . | + | . | gene_id | "XLOC_068282"; | transcript_id | "Novel_000866"; | exon_number | "4";  | gene_type | " |
| At_chr4 | Cufflinks | exon | 85364677 | 85364751 | . | + | . | gene_id | "XLOC_068296"; | transcript_id | "Novel_000867"; | exon_number | "1";  | gene_type | " |
| At_chr4 | Cufflinks | exon | 85364854 | 85364978 | . | + | . | gene_id | "XLOC_068296"; | transcript_id | "Novel_000867"; | exon_number | "2";  | gene_type | " |
| At_chr4 | Cufflinks | exon | 85365075 | 85365173 | . | + | . | gene_id | "XLOC_068296"; | transcript_id | "Novel_000867"; | exon_number | "3";  | gene_type | " |
| At_chr4 | Cufflinks | exon | 85365304 | 85366079 | . | + | . | gene_id | "XLOC_068296"; | transcript_id | "Novel_000867"; | exon_number | "4";  | gene_type | " |
| At_chr4 | Cufflinks | exon | 85364901 | 85365173 | . | + | . | gene_id | "XLOC_068296"; | transcript_id | "Novel_000868"; | exon_number | "1";  | gene_type | " |
| At_chr4 | Cufflinks | exon | 85365304 | 85365639 | . | + | . | gene_id | "XLOC_068296"; | transcript_id | "Novel_000868"; | exon_number | "2";  | gene_type | " |
| At_chr4 | Cufflinks | exon | 85687026 | 85687260 | . | + | . | gene_id | "XLOC_068369"; | transcript_id | "Novel_000869"; | exon_number | "1";  | gene_type | " |
| At_chr4 | Cufflinks | exon | 86301201 | 86301310 | . | + | . | gene_id | "XLOC_068434"; | transcript_id | "Novel_000870"; | exon_number | "1";  | gene_type | " |
| At_chr4 | Cufflinks | exon | 86302568 | 86302634 | . | + | . | gene_id | "XLOC_068434"; | transcript_id | "Novel_000870"; | exon_number | "2";  | gene_type | " |
| At_chr4 | Cufflinks | exon | 86302958 | 86303031 | . | + | . | gene_id | "XLOC_068434"; | transcript_id | "Novel_000870"; | exon_number | "3";  | gene_type | " |
| At_chr4 | Cufflinks | exon | 86303131 | 86303215 | . | + | . | gene_id | "XLOC_068434"; | transcript_id | "Novel_000870"; | exon_number | "4";  | gene_type | " |
| At_chr4 | Cufflinks | exon | 86303304 | 86303359 | . | + | . | gene_id | "XLOC_068434"; | transcript_id | "Novel_000870"; | exon_number | "5";  | gene_type | " |
| At_chr4 | Cufflinks | exon | 86303825 | 86303879 | . | + | . | gene_id | "XLOC_068434"; | transcript_id | "Novel_000870"; | exon_number | "6";  | gene_type | " |
| At_chr4 | Cufflinks | exon | 86304191 | 86304238 | . | + | . | gene_id | "XLOC_068434"; | transcript_id | "Novel_000870"; | exon_number | "7";  | gene_type | " |
| At_chr4 | Cufflinks | exon | 86304403 | 86304486 | . | + | . | gene_id | "XLOC_068434"; | transcript_id | "Novel_000870"; | exon_number | "8";  | gene_type | " |
| At_chr4 | Cufflinks | exon | 86304650 | 86304766 | . | + | . | gene_id | "XLOC_068434"; | transcript_id | "Novel_000870"; | exon_number | "9";  | gene_type | " |
| At_chr4 | Cufflinks | exon | 86304851 | 86304934 | . | + | . | gene_id | "XLOC_068434"; | transcript_id | "Novel_000870"; | exon_number | "10"; | gene_type | " |
| At_chr4 | Cufflinks | exon | 86305018 | 86305143 | . | + | . | gene_id | "XLOC_068434"; | transcript_id | "Novel_000870"; | exon_number | "11"; | gene_type | " |
| At_chr4 | Cufflinks | exon | 86305260 | 86305357 | . | + | . | gene_id | "XLOC_068434"; | transcript_id | "Novel_000870"; | exon_number | "12"; | gene_type | " |
| At_chr4 | Cufflinks | exon | 86305527 | 86305880 | . | + | . | gene_id | "XLOC_068434"; | transcript_id | "Novel_000870"; | exon_number | "13"; | gene_type | " |
| At_chr4 | Cufflinks | exon | 4238327  | 4238894  | . | - | . | gene_id | "XLOC_069070"; | transcript_id | "Novel_000871"; | exon_number | "1";  | gene_type | " |
| At_chr4 | Cufflinks | exon | 4240092  | 4240172  | . | - | . | gene_id | "XLOC_069070"; | transcript_id | "Novel_000871"; | exon_number | "2";  | gene_type | " |
| At_chr4 | Cufflinks | exon | 4241056  | 4241129  | . | - | . | gene_id | "XLOC_069070"; | transcript_id | "Novel_000871"; | exon_number | "3";  | gene_type | " |
| At_chr4 | Cufflinks | exon | 4395749  | 4397687  | . | - | . | gene_id | "XLOC_069082"; | transcript_id | "Novel_000872"; | exon_number | "1";  | gene_type | " |
| At_chr4 | Cufflinks | exon | 4398612  | 4398724  | . | - | . | gene_id | "XLOC_069082"; | transcript_id | "Novel_000872"; | exon_number | "2";  | gene_type | " |

|         |           |      |          |          |   |   |         |                |               |                 |             |      |           |   |
|---------|-----------|------|----------|----------|---|---|---------|----------------|---------------|-----------------|-------------|------|-----------|---|
| At_chr4 | Cufflinks | exon | 4395993  | 4397606  | . | . | gene_id | "XLOC_069082"; | transcript_id | "Novel_000873"; | exon_number | "1"; | gene_type | " |
| At_chr4 | Cufflinks | exon | 4403222  | 4403302  | . | . | gene_id | "XLOC_069082"; | transcript_id | "Novel_000873"; | exon_number | "2"; | gene_type | " |
| At_chr4 | Cufflinks | exon | 4404251  | 4404438  | . | . | gene_id | "XLOC_069082"; | transcript_id | "Novel_000873"; | exon_number | "3"; | gene_type | " |
| At_chr4 | Cufflinks | exon | 4396005  | 4397334  | . | . | gene_id | "XLOC_069082"; | transcript_id | "Novel_000874"; | exon_number | "1"; | gene_type | " |
| At_chr4 | Cufflinks | exon | 4397563  | 4397563  | . | . | gene_id | "XLOC_069082"; | transcript_id | "Novel_000874"; | exon_number | "2"; | gene_type | " |
| At_chr4 | Cufflinks | exon | 4396009  | 4397606  | . | . | gene_id | "XLOC_069082"; | transcript_id | "Novel_000875"; | exon_number | "1"; | gene_type | " |
| At_chr4 | Cufflinks | exon | 4403222  | 4404202  | . | . | gene_id | "XLOC_069082"; | transcript_id | "Novel_000875"; | exon_number | "2"; | gene_type | " |
| At_chr4 | Cufflinks | exon | 4401622  | 4403302  | . | . | gene_id | "XLOC_069082"; | transcript_id | "Novel_000876"; | exon_number | "1"; | gene_type | " |
| At_chr4 | Cufflinks | exon | 4404251  | 4404490  | . | . | gene_id | "XLOC_069082"; | transcript_id | "Novel_000876"; | exon_number | "2"; | gene_type | " |
| At_chr4 | Cufflinks | exon | 4408186  | 4409730  | . | . | gene_id | "XLOC_069084"; | transcript_id | "Novel_000877"; | exon_number | "1"; | gene_type | " |
| At_chr4 | Cufflinks | exon | 4410386  | 4410496  | . | . | gene_id | "XLOC_069084"; | transcript_id | "Novel_000877"; | exon_number | "2"; | gene_type | " |
| At_chr4 | Cufflinks | exon | 5009117  | 5009499  | . | . | gene_id | "XLOC_069175"; | transcript_id | "Novel_000878"; | exon_number | "1"; | gene_type | " |
| At_chr4 | Cufflinks | exon | 5195207  | 5195585  | . | . | gene_id | "XLOC_069190"; | transcript_id | "Novel_000879"; | exon_number | "1"; | gene_type | " |
| At_chr4 | Cufflinks | exon | 5195688  | 5195756  | . | . | gene_id | "XLOC_069190"; | transcript_id | "Novel_000879"; | exon_number | "2"; | gene_type | " |
| At_chr4 | Cufflinks | exon | 5195863  | 5195976  | . | . | gene_id | "XLOC_069190"; | transcript_id | "Novel_000879"; | exon_number | "3"; | gene_type | " |
| At_chr4 | Cufflinks | exon | 5196075  | 5196190  | . | . | gene_id | "XLOC_069190"; | transcript_id | "Novel_000879"; | exon_number | "4"; | gene_type | " |
| At_chr4 | Cufflinks | exon | 6061817  | 6062694  | . | . | gene_id | "XLOC_069234"; | transcript_id | "Novel_000880"; | exon_number | "1"; | gene_type | " |
| At_chr4 | Cufflinks | exon | 6063167  | 6063274  | . | . | gene_id | "XLOC_069234"; | transcript_id | "Novel_000880"; | exon_number | "2"; | gene_type | " |
| At_chr4 | Cufflinks | exon | 6063776  | 6065181  | . | . | gene_id | "XLOC_069234"; | transcript_id | "Novel_000880"; | exon_number | "3"; | gene_type | " |
| At_chr4 | Cufflinks | exon | 14954214 | 14955295 | . | . | gene_id | "XLOC_069446"; | transcript_id | "Novel_000881"; | exon_number | "1"; | gene_type | " |
| At_chr4 | Cufflinks | exon | 1495486  | 14956295 | . | . | gene_id | "XLOC_069446"; | transcript_id | "Novel_000881"; | exon_number | "2"; | gene_type | " |
| At_chr4 | Cufflinks | exon | 14956367 | 14957121 | . | . | gene_id | "XLOC_069446"; | transcript_id | "Novel_000881"; | exon_number | "3"; | gene_type | " |
| At_chr4 | Cufflinks | exon | 14957791 | 14957886 | . | . | gene_id | "XLOC_069446"; | transcript_id | "Novel_000881"; | exon_number | "4"; | gene_type | " |
| At_chr4 | Cufflinks | exon | 14954219 | 14956295 | . | . | gene_id | "XLOC_069446"; | transcript_id | "Novel_000882"; | exon_number | "1"; | gene_type | " |
| At_chr4 | Cufflinks | exon | 14956367 | 14957701 | . | . | gene_id | "XLOC_069446"; | transcript_id | "Novel_000882"; | exon_number | "2"; | gene_type | " |
| At_chr4 | Cufflinks | exon | 14954757 | 14955295 | . | . | gene_id | "XLOC_069446"; | transcript_id | "Novel_000883"; | exon_number | "1"; | gene_type | " |
| At_chr4 | Cufflinks | exon | 14955486 | 14955653 | . | . | gene_id | "XLOC_069446"; | transcript_id | "Novel_000883"; | exon_number | "2"; | gene_type | " |
| At_chr4 | Cufflinks | exon | 14955918 | 14956295 | . | . | gene_id | "XLOC_069446"; | transcript_id | "Novel_000883"; | exon_number | "3"; | gene_type | " |
| At_chr4 | Cufflinks | exon | 14956367 | 14956646 | . | . | gene_id | "XLOC_069446"; | transcript_id | "Novel_000883"; | exon_number | "4"; | gene_type | " |
| At_chr4 | Cufflinks | exon | 14957006 | 14957121 | . | . | gene_id | "XLOC_069446"; | transcript_id | "Novel_000883"; | exon_number | "5"; | gene_type | " |
| At_chr4 | Cufflinks | exon | 14957791 | 14957826 | . | . | gene_id | "XLOC_069446"; | transcript_id | "Novel_000883"; | exon_number | "6"; | gene_type | " |
| At_chr4 | Cufflinks | exon | 15778617 | 15786449 | . | . | gene_id | "XLOC_069485"; | transcript_id | "Novel_000884"; | exon_number | "1"; | gene_type | " |
| At_chr4 | Cufflinks | exon | 15786644 | 15787697 | . | . | gene_id | "XLOC_069485"; | transcript_id | "Novel_000884"; | exon_number | "2"; | gene_type | " |
| At_chr4 | Cufflinks | exon | 23414641 | 23415688 | . | . | gene_id | "XLOC_069758"; | transcript_id | "Novel_000885"; | exon_number | "1"; | gene_type | " |
| At_chr4 | Cufflinks | exon | 23486115 | 23486237 | . | . | gene_id | "XLOC_069767"; | transcript_id | "Novel_000886"; | exon_number | "1"; | gene_type | " |

|         |           |      |          |          |   |   |   |         |                |               |                 |             |      |           |   |
|---------|-----------|------|----------|----------|---|---|---|---------|----------------|---------------|-----------------|-------------|------|-----------|---|
| At_chr4 | Cufflinks | exon | 23487252 | 23487330 | . | - | . | gene_id | "XLOC_069767"; | transcript_id | "Novel_000886"; | exon_number | "2"; | gene_type | " |
| At_chr4 | Cufflinks | exon | 23487477 | 23487511 | . | - | . | gene_id | "XLOC_069767"; | transcript_id | "Novel_000886"; | exon_number | "3"; | gene_type | " |
| At_chr4 | Cufflinks | exon | 32959888 | 32960042 | . | - | . | gene_id | "XLOC_070023"; | transcript_id | "Novel_000887"; | exon_number | "1"; | gene_type | " |
| At_chr4 | Cufflinks | exon | 32960728 | 32961874 | . | - | . | gene_id | "XLOC_070023"; | transcript_id | "Novel_000887"; | exon_number | "2"; | gene_type | " |
| At_chr4 | Cufflinks | exon | 32962104 | 32962512 | . | - | . | gene_id | "XLOC_070023"; | transcript_id | "Novel_000888"; | exon_number | "1"; | gene_type | " |
| At_chr4 | Cufflinks | exon | 32963750 | 32963915 | . | - | . | gene_id | "XLOC_070023"; | transcript_id | "Novel_000888"; | exon_number | "2"; | gene_type | " |
| At_chr4 | Cufflinks | exon | 32965176 | 32965477 | . | - | . | gene_id | "XLOC_070023"; | transcript_id | "Novel_000888"; | exon_number | "3"; | gene_type | " |
| At_chr4 | Cufflinks | exon | 34540724 | 34541416 | . | - | . | gene_id | "XLOC_070067"; | transcript_id | "Novel_000889"; | exon_number | "1"; | gene_type | " |
| At_chr4 | Cufflinks | exon | 34548592 | 34548650 | . | - | . | gene_id | "XLOC_070067"; | transcript_id | "Novel_000889"; | exon_number | "2"; | gene_type | " |
| At_chr4 | Cufflinks | exon | 34549355 | 34549658 | . | - | . | gene_id | "XLOC_070067"; | transcript_id | "Novel_000889"; | exon_number | "3"; | gene_type | " |
| At_chr4 | Cufflinks | exon | 34637474 | 34637675 | . | - | . | gene_id | "XLOC_070070"; | transcript_id | "Novel_000890"; | exon_number | "1"; | gene_type | " |
| At_chr4 | Cufflinks | exon | 34739645 | 34739994 | . | - | . | gene_id | "XLOC_070082"; | transcript_id | "Novel_000891"; | exon_number | "1"; | gene_type | " |
| At_chr4 | Cufflinks | exon | 34740268 | 34741967 | . | - | . | gene_id | "XLOC_070082"; | transcript_id | "Novel_000891"; | exon_number | "2"; | gene_type | " |
| At_chr4 | Cufflinks | exon | 35761605 | 35761875 | . | - | . | gene_id | "XLOC_070115"; | transcript_id | "Novel_000892"; | exon_number | "1"; | gene_type | " |
| At_chr4 | Cufflinks | exon | 35762449 | 35762631 | . | - | . | gene_id | "XLOC_070115"; | transcript_id | "Novel_000892"; | exon_number | "2"; | gene_type | " |
| At_chr4 | Cufflinks | exon | 35762735 | 35762860 | . | - | . | gene_id | "XLOC_070115"; | transcript_id | "Novel_000892"; | exon_number | "3"; | gene_type | " |
| At_chr4 | Cufflinks | exon | 35762963 | 35763052 | . | - | . | gene_id | "XLOC_070115"; | transcript_id | "Novel_000892"; | exon_number | "4"; | gene_type | " |
| At_chr4 | Cufflinks | exon | 35763145 | 35763236 | . | - | . | gene_id | "XLOC_070115"; | transcript_id | "Novel_000892"; | exon_number | "5"; | gene_type | " |
| At_chr4 | Cufflinks | exon | 36738860 | 36739812 | . | - | . | gene_id | "XLOC_070221"; | transcript_id | "Novel_000893"; | exon_number | "1"; | gene_type | " |
| At_chr4 | Cufflinks | exon | 36740392 | 36740960 | . | - | . | gene_id | "XLOC_070221"; | transcript_id | "Novel_000893"; | exon_number | "2"; | gene_type | " |
| At_chr4 | Cufflinks | exon | 36738948 | 36739812 | . | - | . | gene_id | "XLOC_070221"; | transcript_id | "Novel_000894"; | exon_number | "1"; | gene_type | " |
| At_chr4 | Cufflinks | exon | 36740392 | 36740521 | . | - | . | gene_id | "XLOC_070221"; | transcript_id | "Novel_000894"; | exon_number | "2"; | gene_type | " |
| At_chr4 | Cufflinks | exon | 36740629 | 36741242 | . | - | . | gene_id | "XLOC_070221"; | transcript_id | "Novel_000894"; | exon_number | "3"; | gene_type | " |
| At_chr4 | Cufflinks | exon | 37307721 | 37307925 | . | - | . | gene_id | "XLOC_070313"; | transcript_id | "Novel_000895"; | exon_number | "1"; | gene_type | " |
| At_chr4 | Cufflinks | exon | 37308618 | 37308666 | . | - | . | gene_id | "XLOC_070313"; | transcript_id | "Novel_000895"; | exon_number | "2"; | gene_type | " |
| At_chr4 | Cufflinks | exon | 37310222 | 37310600 | . | - | . | gene_id | "XLOC_070313"; | transcript_id | "Novel_000895"; | exon_number | "3"; | gene_type | " |
| At_chr4 | Cufflinks | exon | 37459095 | 37459503 | . | - | . | gene_id | "XLOC_070342"; | transcript_id | "Novel_000896"; | exon_number | "1"; | gene_type | " |
| At_chr4 | Cufflinks | exon | 37459851 | 37459902 | . | - | . | gene_id | "XLOC_070342"; | transcript_id | "Novel_000896"; | exon_number | "2"; | gene_type | " |
| At_chr4 | Cufflinks | exon | 37460193 | 37460266 | . | - | . | gene_id | "XLOC_070342"; | transcript_id | "Novel_000896"; | exon_number | "3"; | gene_type | " |
| At_chr4 | Cufflinks | exon | 37460612 | 37460661 | . | - | . | gene_id | "XLOC_070342"; | transcript_id | "Novel_000896"; | exon_number | "4"; | gene_type | " |
| At_chr4 | Cufflinks | exon | 37460754 | 37460835 | . | - | . | gene_id | "XLOC_070342"; | transcript_id | "Novel_000896"; | exon_number | "5"; | gene_type | " |
| At_chr4 | Cufflinks | exon | 37461179 | 37461221 | . | - | . | gene_id | "XLOC_070342"; | transcript_id | "Novel_000896"; | exon_number | "6"; | gene_type | " |
| At_chr4 | Cufflinks | exon | 37461297 | 37461599 | . | - | . | gene_id | "XLOC_070342"; | transcript_id | "Novel_000896"; | exon_number | "7"; | gene_type | " |
| At_chr4 | Cufflinks | exon | 37459543 | 37459769 | . | - | . | gene_id | "XLOC_070342"; | transcript_id | "Novel_000897"; | exon_number | "1"; | gene_type | " |
| At_chr4 | Cufflinks | exon | 37459851 | 37459902 | . | - | . | gene_id | "XLOC_070342"; | transcript_id | "Novel_000897"; | exon_number | "2"; | gene_type | " |

|         |           |      |          |          |   |   |   |         |                |               |                 |             |      |           |   |
|---------|-----------|------|----------|----------|---|---|---|---------|----------------|---------------|-----------------|-------------|------|-----------|---|
| At_chr4 | Cufflinks | exon | 37460193 | 37460266 | . | - | . | gene_id | "XLOC_070342"; | transcript_id | "Novel_000897"; | exon_number | "3"; | gene_type | " |
| At_chr4 | Cufflinks | exon | 37460612 | 37460661 | . | - | . | gene_id | "XLOC_070342"; | transcript_id | "Novel_000897"; | exon_number | "4"; | gene_type | " |
| At_chr4 | Cufflinks | exon | 37460754 | 37460835 | . | - | . | gene_id | "XLOC_070342"; | transcript_id | "Novel_000897"; | exon_number | "5"; | gene_type | " |
| At_chr4 | Cufflinks | exon | 37461179 | 37461221 | . | - | . | gene_id | "XLOC_070342"; | transcript_id | "Novel_000897"; | exon_number | "6"; | gene_type | " |
| At_chr4 | Cufflinks | exon | 37461297 | 37461603 | . | - | . | gene_id | "XLOC_070342"; | transcript_id | "Novel_000897"; | exon_number | "7"; | gene_type | " |
| At_chr4 | Cufflinks | exon | 37698984 | 37700154 | . | - | . | gene_id | "XLOC_070375"; | transcript_id | "Novel_000898"; | exon_number | "1"; | gene_type | " |
| At_chr4 | Cufflinks | exon | 37762382 | 37762732 | . | - | . | gene_id | "XLOC_070389"; | transcript_id | "Novel_000899"; | exon_number | "1"; | gene_type | " |
| At_chr4 | Cufflinks | exon | 37763554 | 37763786 | . | - | . | gene_id | "XLOC_070389"; | transcript_id | "Novel_000899"; | exon_number | "2"; | gene_type | " |
| At_chr4 | Cufflinks | exon | 37764707 | 37765201 | . | - | . | gene_id | "XLOC_070389"; | transcript_id | "Novel_000899"; | exon_number | "3"; | gene_type | " |
| At_chr4 | Cufflinks | exon | 37763537 | 37763786 | . | - | . | gene_id | "XLOC_070389"; | transcript_id | "Novel_000900"; | exon_number | "1"; | gene_type | " |
| At_chr4 | Cufflinks | exon | 37764707 | 37765197 | . | - | . | gene_id | "XLOC_070389"; | transcript_id | "Novel_000900"; | exon_number | "2"; | gene_type | " |
| At_chr4 | Cufflinks | exon | 37898983 | 37899293 | . | - | . | gene_id | "XLOC_070426"; | transcript_id | "Novel_000901"; | exon_number | "1"; | gene_type | " |
| At_chr4 | Cufflinks | exon | 37899563 | 37899599 | . | - | . | gene_id | "XLOC_070426"; | transcript_id | "Novel_000901"; | exon_number | "2"; | gene_type | " |
| At_chr4 | Cufflinks | exon | 37900950 | 37901252 | . | - | . | gene_id | "XLOC_070426"; | transcript_id | "Novel_000901"; | exon_number | "3"; | gene_type | " |
| At_chr4 | Cufflinks | exon | 38154665 | 38155996 | . | - | . | gene_id | "XLOC_070487"; | transcript_id | "Novel_000902"; | exon_number | "1"; | gene_type | " |
| At_chr4 | Cufflinks | exon | 38156490 | 38156597 | . | - | . | gene_id | "XLOC_070487"; | transcript_id | "Novel_000902"; | exon_number | "2"; | gene_type | " |
| At_chr4 | Cufflinks | exon | 38332481 | 38335042 | . | - | . | gene_id | "XLOC_070522"; | transcript_id | "Novel_000903"; | exon_number | "1"; | gene_type | " |
| At_chr4 | Cufflinks | exon | 38336015 | 38336090 | . | - | . | gene_id | "XLOC_070522"; | transcript_id | "Novel_000903"; | exon_number | "2"; | gene_type | " |
| At_chr4 | Cufflinks | exon | 38336165 | 38336271 | . | - | . | gene_id | "XLOC_070522"; | transcript_id | "Novel_000903"; | exon_number | "3"; | gene_type | " |
| At_chr4 | Cufflinks | exon | 38332481 | 38335042 | . | - | . | gene_id | "XLOC_070522"; | transcript_id | "Novel_000904"; | exon_number | "1"; | gene_type | " |
| At_chr4 | Cufflinks | exon | 38336015 | 38336305 | . | - | . | gene_id | "XLOC_070522"; | transcript_id | "Novel_000904"; | exon_number | "2"; | gene_type | " |
| At_chr4 | Cufflinks | exon | 38338054 | 38339780 | . | - | . | gene_id | "XLOC_070522"; | transcript_id | "Novel_000905"; | exon_number | "1"; | gene_type | " |
| At_chr4 | Cufflinks | exon | 38341565 | 38341851 | . | - | . | gene_id | "XLOC_070522"; | transcript_id | "Novel_000905"; | exon_number | "2"; | gene_type | " |
| At_chr4 | Cufflinks | exon | 45137749 | 45137973 | . | - | . | gene_id | "XLOC_070736"; | transcript_id | "Novel_000906"; | exon_number | "1"; | gene_type | " |
| At_chr4 | Cufflinks | exon | 45138084 | 45138235 | . | - | . | gene_id | "XLOC_070736"; | transcript_id | "Novel_000906"; | exon_number | "2"; | gene_type | " |
| At_chr4 | Cufflinks | exon | 45139788 | 45139980 | . | - | . | gene_id | "XLOC_070736"; | transcript_id | "Novel_000906"; | exon_number | "3"; | gene_type | " |
| At_chr4 | Cufflinks | exon | 46482089 | 46482740 | . | - | . | gene_id | "XLOC_070773"; | transcript_id | "Novel_000907"; | exon_number | "1"; | gene_type | " |
| At_chr4 | Cufflinks | exon | 46482813 | 46482933 | . | - | . | gene_id | "XLOC_070773"; | transcript_id | "Novel_000907"; | exon_number | "2"; | gene_type | " |
| At_chr4 | Cufflinks | exon | 46485123 | 46485238 | . | - | . | gene_id | "XLOC_070773"; | transcript_id | "Novel_000907"; | exon_number | "3"; | gene_type | " |
| At_chr4 | Cufflinks | exon | 46482089 | 46482933 | . | - | . | gene_id | "XLOC_070773"; | transcript_id | "Novel_000908"; | exon_number | "1"; | gene_type | " |
| At_chr4 | Cufflinks | exon | 46485123 | 46485238 | . | - | . | gene_id | "XLOC_070773"; | transcript_id | "Novel_000908"; | exon_number | "2"; | gene_type | " |
| At_chr4 | Cufflinks | exon | 46859391 | 46859806 | . | - | . | gene_id | "XLOC_070780"; | transcript_id | "Novel_000909"; | exon_number | "1"; | gene_type | " |
| At_chr4 | Cufflinks | exon | 46859873 | 46860448 | . | - | . | gene_id | "XLOC_070780"; | transcript_id | "Novel_000909"; | exon_number | "2"; | gene_type | " |
| At_chr4 | Cufflinks | exon | 46860623 | 46864012 | . | - | . | gene_id | "XLOC_070780"; | transcript_id | "Novel_000909"; | exon_number | "3"; | gene_type | " |
| At_chr4 | Cufflinks | exon | 60814252 | 60814576 | . | - | . | gene_id | "XLOC_071142"; | transcript_id | "Novel_000910"; | exon_number | "1"; | gene_type | " |





|         |           |      |          |          |   |   |   |         |                |               |                 |             |      |           |   |
|---------|-----------|------|----------|----------|---|---|---|---------|----------------|---------------|-----------------|-------------|------|-----------|---|
| At_chr4 | Cufflinks | exon | 63262419 | 63262524 | . | - | . | gene_id | "XLOC_071230"; | transcript_id | "Novel_000913"; | exon_number | "2"; | gene_type | " |
| At_chr4 | Cufflinks | exon | 63262658 | 63262903 | . | - | . | gene_id | "XLOC_071230"; | transcript_id | "Novel_000913"; | exon_number | "3"; | gene_type | " |
| At_chr4 | Cufflinks | exon | 66091258 | 66093311 | . | - | . | gene_id | "XLOC_071324"; | transcript_id | "Novel_000914"; | exon_number | "1"; | gene_type | " |
| At_chr4 | Cufflinks | exon | 66093447 | 66093492 | . | - | . | gene_id | "XLOC_071324"; | transcript_id | "Novel_000914"; | exon_number | "2"; | gene_type | " |
| At_chr4 | Cufflinks | exon | 66094106 | 66094687 | . | - | . | gene_id | "XLOC_071324"; | transcript_id | "Novel_000914"; | exon_number | "3"; | gene_type | " |
| At_chr4 | Cufflinks | exon | 66094811 | 66094936 | . | - | . | gene_id | "XLOC_071324"; | transcript_id | "Novel_000914"; | exon_number | "4"; | gene_type | " |
| At_chr4 | Cufflinks | exon | 66093605 | 66094687 | . | - | . | gene_id | "XLOC_071324"; | transcript_id | "Novel_000915"; | exon_number | "1"; | gene_type | " |
| At_chr4 | Cufflinks | exon | 66094811 | 66094918 | . | - | . | gene_id | "XLOC_071324"; | transcript_id | "Novel_000915"; | exon_number | "2"; | gene_type | " |
| At_chr4 | Cufflinks | exon | 69047154 | 69047177 | . | - | . | gene_id | "XLOC_071428"; | transcript_id | "Novel_000916"; | exon_number | "1"; | gene_type | " |
| At_chr4 | Cufflinks | exon | 69047573 | 69047637 | . | - | . | gene_id | "XLOC_071428"; | transcript_id | "Novel_000916"; | exon_number | "2"; | gene_type | " |
| At_chr4 | Cufflinks | exon | 69048179 | 69048333 | . | - | . | gene_id | "XLOC_071428"; | transcript_id | "Novel_000916"; | exon_number | "3"; | gene_type | " |
| At_chr4 | Cufflinks | exon | 69048361 | 69048452 | . | - | . | gene_id | "XLOC_071428"; | transcript_id | "Novel_000917"; | exon_number | "1"; | gene_type | " |
| At_chr4 | Cufflinks | exon | 69048552 | 69048662 | . | - | . | gene_id | "XLOC_071428"; | transcript_id | "Novel_000917"; | exon_number | "2"; | gene_type | " |
| At_chr4 | Cufflinks | exon | 82326656 | 82327397 | . | - | . | gene_id | "XLOC_071933"; | transcript_id | "Novel_000918"; | exon_number | "1"; | gene_type | " |
| At_chr4 | Cufflinks | exon | 82327545 | 82327972 | . | - | . | gene_id | "XLOC_071933"; | transcript_id | "Novel_000918"; | exon_number | "2"; | gene_type | " |
| At_chr4 | Cufflinks | exon | 82875226 | 82876900 | . | - | . | gene_id | "XLOC_071962"; | transcript_id | "Novel_000919"; | exon_number | "1"; | gene_type | " |
| At_chr4 | Cufflinks | exon | 83739414 | 83739875 | . | - | . | gene_id | "XLOC_072006"; | transcript_id | "Novel_000920"; | exon_number | "1"; | gene_type | " |
| At_chr4 | Cufflinks | exon | 83739962 | 83740264 | . | - | . | gene_id | "XLOC_072006"; | transcript_id | "Novel_000920"; | exon_number | "2"; | gene_type | " |
| At_chr4 | Cufflinks | exon | 84141680 | 84142499 | . | - | . | gene_id | "XLOC_072037"; | transcript_id | "Novel_000921"; | exon_number | "1"; | gene_type | " |
| At_chr4 | Cufflinks | exon | 84143001 | 84144833 | . | - | . | gene_id | "XLOC_072037"; | transcript_id | "Novel_000921"; | exon_number | "2"; | gene_type | " |
| At_chr4 | Cufflinks | exon | 84141697 | 84142499 | . | - | . | gene_id | "XLOC_072037"; | transcript_id | "Novel_000922"; | exon_number | "1"; | gene_type | " |
| At_chr4 | Cufflinks | exon | 84143001 | 84143452 | . | - | . | gene_id | "XLOC_072037"; | transcript_id | "Novel_000922"; | exon_number | "2"; | gene_type | " |
| At_chr4 | Cufflinks | exon | 84144104 | 84144197 | . | - | . | gene_id | "XLOC_072037"; | transcript_id | "Novel_000922"; | exon_number | "3"; | gene_type | " |
| At_chr4 | Cufflinks | exon | 84144273 | 84144618 | . | - | . | gene_id | "XLOC_072037"; | transcript_id | "Novel_000922"; | exon_number | "4"; | gene_type | " |
| At_chr4 | Cufflinks | exon | 84144774 | 84144850 | . | - | . | gene_id | "XLOC_072037"; | transcript_id | "Novel_000922"; | exon_number | "5"; | gene_type | " |
| At_chr4 | Cufflinks | exon | 84265585 | 84265751 | . | - | . | gene_id | "XLOC_072048"; | transcript_id | "Novel_000923"; | exon_number | "1"; | gene_type | " |
| At_chr4 | Cufflinks | exon | 84265844 | 84265877 | . | - | . | gene_id | "XLOC_072048"; | transcript_id | "Novel_000923"; | exon_number | "2"; | gene_type | " |
| At_chr4 | Cufflinks | exon | 84385054 | 84385557 | . | - | . | gene_id | "XLOC_072063"; | transcript_id | "Novel_000924"; | exon_number | "1"; | gene_type | " |
| At_chr4 | Cufflinks | exon | 84386790 | 84387015 | . | - | . | gene_id | "XLOC_072063"; | transcript_id | "Novel_000924"; | exon_number | "2"; | gene_type | " |
| At_chr4 | Cufflinks | exon | 84387096 | 84387452 | . | - | . | gene_id | "XLOC_072063"; | transcript_id | "Novel_000924"; | exon_number | "3"; | gene_type | " |
| At_chr4 | Cufflinks | exon | 84435554 | 84435929 | . | - | . | gene_id | "XLOC_072067"; | transcript_id | "Novel_000925"; | exon_number | "1"; | gene_type | " |
| At_chr4 | Cufflinks | exon | 84437234 | 84437357 | . | - | . | gene_id | "XLOC_072067"; | transcript_id | "Novel_000925"; | exon_number | "2"; | gene_type | " |
| At_chr4 | Cufflinks | exon | 84437451 | 84437604 | . | - | . | gene_id | "XLOC_072067"; | transcript_id | "Novel_000925"; | exon_number | "3"; | gene_type | " |
| At_chr4 | Cufflinks | exon | 84438365 | 84438742 | . | - | . | gene_id | "XLOC_072067"; | transcript_id | "Novel_000925"; | exon_number | "4"; | gene_type | " |
| At_chr4 | Cufflinks | exon | 84439129 | 84439289 | . | - | . | gene_id | "XLOC_072067"; | transcript_id | "Novel_000925"; | exon_number | "5"; | gene_type | " |

|         |           |      |          |          |   |   |   |         |                |               |                 |             |       |           |   |
|---------|-----------|------|----------|----------|---|---|---|---------|----------------|---------------|-----------------|-------------|-------|-----------|---|
| At_chr4 | Cufflinks | exon | 84439846 | 84439865 | . | - | . | gene_id | "XLOC_072067"; | transcript_id | "Novel_000925"; | exon_number | "6";  | gene_type | " |
| At_chr4 | Cufflinks | exon | 84441027 | 84441985 | . | - | . | gene_id | "XLOC_072067"; | transcript_id | "Novel_000926"; | exon_number | "1";  | gene_type | " |
| At_chr4 | Cufflinks | exon | 84442083 | 84442519 | . | - | . | gene_id | "XLOC_072067"; | transcript_id | "Novel_000926"; | exon_number | "2";  | gene_type | " |
| At_chr4 | Cufflinks | exon | 84442727 | 84443495 | . | - | . | gene_id | "XLOC_072067"; | transcript_id | "Novel_000926"; | exon_number | "3";  | gene_type | " |
| At_chr4 | Cufflinks | exon | 84443604 | 84444009 | . | - | . | gene_id | "XLOC_072069"; | transcript_id | "Novel_000927"; | exon_number | "1";  | gene_type | " |
| At_chr4 | Cufflinks | exon | 84444143 | 84444493 | . | - | . | gene_id | "XLOC_072069"; | transcript_id | "Novel_000927"; | exon_number | "2";  | gene_type | " |
| At_chr4 | Cufflinks | exon | 84444629 | 84444759 | . | - | . | gene_id | "XLOC_072069"; | transcript_id | "Novel_000927"; | exon_number | "3";  | gene_type | " |
| At_chr4 | Cufflinks | exon | 84444872 | 84444944 | . | - | . | gene_id | "XLOC_072069"; | transcript_id | "Novel_000927"; | exon_number | "4";  | gene_type | " |
| At_chr4 | Cufflinks | exon | 84446902 | 84447486 | . | - | . | gene_id | "XLOC_072069"; | transcript_id | "Novel_000927"; | exon_number | "5";  | gene_type | " |
| At_chr4 | Cufflinks | exon | 84443614 | 84444009 | . | - | . | gene_id | "XLOC_072069"; | transcript_id | "Novel_000928"; | exon_number | "1";  | gene_type | " |
| At_chr4 | Cufflinks | exon | 84444143 | 84444759 | . | - | . | gene_id | "XLOC_072069"; | transcript_id | "Novel_000928"; | exon_number | "2";  | gene_type | " |
| At_chr4 | Cufflinks | exon | 84444872 | 84444944 | . | - | . | gene_id | "XLOC_072069"; | transcript_id | "Novel_000928"; | exon_number | "3";  | gene_type | " |
| At_chr4 | Cufflinks | exon | 84446902 | 84447509 | . | - | . | gene_id | "XLOC_072069"; | transcript_id | "Novel_000928"; | exon_number | "4";  | gene_type | " |
| At_chr4 | Cufflinks | exon | 84451635 | 84454072 | . | - | . | gene_id | "XLOC_072072"; | transcript_id | "Novel_000929"; | exon_number | "1";  | gene_type | " |
| At_chr4 | Cufflinks | exon | 84454170 | 84454608 | . | - | . | gene_id | "XLOC_072072"; | transcript_id | "Novel_000929"; | exon_number | "2";  | gene_type | " |
| At_chr4 | Cufflinks | exon | 84494485 | 84496617 | . | - | . | gene_id | "XLOC_072076"; | transcript_id | "Novel_000930"; | exon_number | "1";  | gene_type | " |
| At_chr4 | Cufflinks | exon | 84498501 | 84499335 | . | - | . | gene_id | "XLOC_072076"; | transcript_id | "Novel_000930"; | exon_number | "2";  | gene_type | " |
| At_chr4 | Cufflinks | exon | 86104914 | 86104967 | . | - | . | gene_id | "XLOC_072239"; | transcript_id | "Novel_000931"; | exon_number | "1";  | gene_type | " |
| At_chr4 | Cufflinks | exon | 86105070 | 86105181 | . | - | . | gene_id | "XLOC_072239"; | transcript_id | "Novel_000931"; | exon_number | "2";  | gene_type | " |
| At_chr4 | Cufflinks | exon | 86105268 | 86105519 | . | - | . | gene_id | "XLOC_072239"; | transcript_id | "Novel_000931"; | exon_number | "3";  | gene_type | " |
| At_chr4 | Cufflinks | exon | 86105621 | 86105722 | . | - | . | gene_id | "XLOC_072239"; | transcript_id | "Novel_000931"; | exon_number | "4";  | gene_type | " |
| At_chr4 | Cufflinks | exon | 86105802 | 86105919 | . | - | . | gene_id | "XLOC_072239"; | transcript_id | "Novel_000931"; | exon_number | "5";  | gene_type | " |
| At_chr4 | Cufflinks | exon | 86106065 | 86106203 | . | - | . | gene_id | "XLOC_072239"; | transcript_id | "Novel_000931"; | exon_number | "6";  | gene_type | " |
| At_chr4 | Cufflinks | exon | 86106440 | 86106627 | . | - | . | gene_id | "XLOC_072239"; | transcript_id | "Novel_000931"; | exon_number | "7";  | gene_type | " |
| At_chr4 | Cufflinks | exon | 86106711 | 86106821 | . | - | . | gene_id | "XLOC_072239"; | transcript_id | "Novel_000931"; | exon_number | "8";  | gene_type | " |
| At_chr4 | Cufflinks | exon | 86106962 | 86107024 | . | - | . | gene_id | "XLOC_072239"; | transcript_id | "Novel_000931"; | exon_number | "9";  | gene_type | " |
| At_chr4 | Cufflinks | exon | 86107556 | 86107655 | . | - | . | gene_id | "XLOC_072239"; | transcript_id | "Novel_000931"; | exon_number | "10"; | gene_type | " |
| At_chr4 | Cufflinks | exon | 86107899 | 86108437 | . | - | . | gene_id | "XLOC_072239"; | transcript_id | "Novel_000931"; | exon_number | "11"; | gene_type | " |
| At_chr4 | Cufflinks | exon | 86108577 | 86108887 | . | - | . | gene_id | "XLOC_072239"; | transcript_id | "Novel_000931"; | exon_number | "12"; | gene_type | " |
| At_chr4 | Cufflinks | exon | 87611618 | 87611960 | . | - | . | gene_id | "XLOC_072364"; | transcript_id | "Novel_000932"; | exon_number | "1";  | gene_type | " |
| At_chr4 | Cufflinks | exon | 87612970 | 87613049 | . | - | . | gene_id | "XLOC_072364"; | transcript_id | "Novel_000932"; | exon_number | "2";  | gene_type | " |
| At_chr4 | Cufflinks | exon | 87613135 | 87615214 | . | - | . | gene_id | "XLOC_072364"; | transcript_id | "Novel_000932"; | exon_number | "3";  | gene_type | " |
| At_chr4 | Cufflinks | exon | 88392653 | 88393042 | . | - | . | gene_id | "XLOC_072414"; | transcript_id | "Novel_000933"; | exon_number | "1";  | gene_type | " |
| At_chr4 | Cufflinks | exon | 89374380 | 89374631 | . | - | . | gene_id | "XLOC_072527"; | transcript_id | "Novel_000934"; | exon_number | "1";  | gene_type | " |
| At_chr4 | Cufflinks | exon | 89535176 | 89536347 | . | - | . | gene_id | "XLOC_072533"; | transcript_id | "Novel_000935"; | exon_number | "1";  | gene_type | " |

|         |           |      |          |          |   |   |   |         |                |               |                 |             |      |           |   |
|---------|-----------|------|----------|----------|---|---|---|---------|----------------|---------------|-----------------|-------------|------|-----------|---|
| At_chr4 | Cufflinks | exon | 89537032 | 89537332 | . | - | . | gene_id | "XLOC_072533"; | transcript_id | "Novel_000935"; | exon_number | "2"; | gene_type | " |
| At_chr5 | Cufflinks | exon | 879697   | 879833   | . | + | . | gene_id | "XLOC_072863"; | transcript_id | "Novel_000936"; | exon_number | "1"; | gene_type | " |
| At_chr5 | Cufflinks | exon | 880750   | 882421   | . | + | . | gene_id | "XLOC_072863"; | transcript_id | "Novel_000936"; | exon_number | "2"; | gene_type | " |
| At_chr5 | Cufflinks | exon | 882536   | 883120   | . | + | . | gene_id | "XLOC_072863"; | transcript_id | "Novel_000936"; | exon_number | "3"; | gene_type | " |
| At_chr5 | Cufflinks | exon | 1733497  | 1733982  | . | + | . | gene_id | "XLOC_073044"; | transcript_id | "Novel_000937"; | exon_number | "1"; | gene_type | " |
| At_chr5 | Cufflinks | exon | 1734094  | 1734363  | . | + | . | gene_id | "XLOC_073044"; | transcript_id | "Novel_000937"; | exon_number | "2"; | gene_type | " |
| At_chr5 | Cufflinks | exon | 1735354  | 1736233  | . | + | . | gene_id | "XLOC_073044"; | transcript_id | "Novel_000937"; | exon_number | "3"; | gene_type | " |
| At_chr5 | Cufflinks | exon | 1740867  | 1741340  | . | + | . | gene_id | "XLOC_073045"; | transcript_id | "Novel_000938"; | exon_number | "1"; | gene_type | " |
| At_chr5 | Cufflinks | exon | 1741421  | 1741690  | . | + | . | gene_id | "XLOC_073045"; | transcript_id | "Novel_000938"; | exon_number | "2"; | gene_type | " |
| At_chr5 | Cufflinks | exon | 1741967  | 1743583  | . | + | . | gene_id | "XLOC_073045"; | transcript_id | "Novel_000938"; | exon_number | "3"; | gene_type | " |
| At_chr5 | Cufflinks | exon | 1740867  | 1741340  | . | + | . | gene_id | "XLOC_073045"; | transcript_id | "Novel_000939"; | exon_number | "1"; | gene_type | " |
| At_chr5 | Cufflinks | exon | 1741421  | 1741690  | . | + | . | gene_id | "XLOC_073045"; | transcript_id | "Novel_000939"; | exon_number | "2"; | gene_type | " |
| At_chr5 | Cufflinks | exon | 1741873  | 1743583  | . | + | . | gene_id | "XLOC_073045"; | transcript_id | "Novel_000939"; | exon_number | "3"; | gene_type | " |
| At_chr5 | Cufflinks | exon | 1740873  | 1741340  | . | + | . | gene_id | "XLOC_073045"; | transcript_id | "Novel_000940"; | exon_number | "1"; | gene_type | " |
| At_chr5 | Cufflinks | exon | 1741421  | 1742972  | . | + | . | gene_id | "XLOC_073045"; | transcript_id | "Novel_000940"; | exon_number | "2"; | gene_type | " |
| At_chr5 | Cufflinks | exon | 1862485  | 1863001  | . | + | . | gene_id | "XLOC_073074"; | transcript_id | "Novel_000941"; | exon_number | "1"; | gene_type | " |
| At_chr5 | Cufflinks | exon | 1863114  | 1863412  | . | + | . | gene_id | "XLOC_073074"; | transcript_id | "Novel_000941"; | exon_number | "2"; | gene_type | " |
| At_chr5 | Cufflinks | exon | 1864320  | 1864460  | . | + | . | gene_id | "XLOC_073074"; | transcript_id | "Novel_000941"; | exon_number | "3"; | gene_type | " |
| At_chr5 | Cufflinks | exon | 1864555  | 1864854  | . | + | . | gene_id | "XLOC_073074"; | transcript_id | "Novel_000941"; | exon_number | "4"; | gene_type | " |
| At_chr5 | Cufflinks | exon | 2317999  | 2318574  | . | + | . | gene_id | "XLOC_073144"; | transcript_id | "Novel_000942"; | exon_number | "1"; | gene_type | " |
| At_chr5 | Cufflinks | exon | 2318676  | 2319054  | . | + | . | gene_id | "XLOC_073144"; | transcript_id | "Novel_000942"; | exon_number | "2"; | gene_type | " |
| At_chr5 | Cufflinks | exon | 2320176  | 2320237  | . | + | . | gene_id | "XLOC_073144"; | transcript_id | "Novel_000942"; | exon_number | "3"; | gene_type | " |
| At_chr5 | Cufflinks | exon | 2320342  | 2320385  | . | + | . | gene_id | "XLOC_073144"; | transcript_id | "Novel_000942"; | exon_number | "4"; | gene_type | " |
| At_chr5 | Cufflinks | exon | 2320575  | 2320677  | . | + | . | gene_id | "XLOC_073144"; | transcript_id | "Novel_000942"; | exon_number | "5"; | gene_type | " |
| At_chr5 | Cufflinks | exon | 2320901  | 2320902  | . | + | . | gene_id | "XLOC_073144"; | transcript_id | "Novel_000942"; | exon_number | "6"; | gene_type | " |
| At_chr5 | Cufflinks | exon | 3715613  | 3715805  | . | + | . | gene_id | "XLOC_073368"; | transcript_id | "Novel_000943"; | exon_number | "1"; | gene_type | " |
| At_chr5 | Cufflinks | exon | 3716101  | 3718796  | . | + | . | gene_id | "XLOC_073368"; | transcript_id | "Novel_000943"; | exon_number | "2"; | gene_type | " |
| At_chr5 | Cufflinks | exon | 4240968  | 4241119  | . | + | . | gene_id | "XLOC_073418"; | transcript_id | "Novel_000944"; | exon_number | "1"; | gene_type | " |
| At_chr5 | Cufflinks | exon | 4241202  | 4241263  | . | + | . | gene_id | "XLOC_073418"; | transcript_id | "Novel_000944"; | exon_number | "2"; | gene_type | " |
| At_chr5 | Cufflinks | exon | 4241510  | 4241570  | . | + | . | gene_id | "XLOC_073418"; | transcript_id | "Novel_000944"; | exon_number | "3"; | gene_type | " |
| At_chr5 | Cufflinks | exon | 4241722  | 4241801  | . | + | . | gene_id | "XLOC_073418"; | transcript_id | "Novel_000944"; | exon_number | "4"; | gene_type | " |
| At_chr5 | Cufflinks | exon | 4242089  | 4242159  | . | + | . | gene_id | "XLOC_073418"; | transcript_id | "Novel_000944"; | exon_number | "5"; | gene_type | " |
| At_chr5 | Cufflinks | exon | 4242436  | 4242525  | . | + | . | gene_id | "XLOC_073418"; | transcript_id | "Novel_000944"; | exon_number | "6"; | gene_type | " |
| At_chr5 | Cufflinks | exon | 4242639  | 4242749  | . | + | . | gene_id | "XLOC_073418"; | transcript_id | "Novel_000944"; | exon_number | "7"; | gene_type | " |
| At_chr5 | Cufflinks | exon | 4242821  | 4243098  | . | + | . | gene_id | "XLOC_073418"; | transcript_id | "Novel_000944"; | exon_number | "8"; | gene_type | " |

|         |           |      |         |         |   |   |   |         |                |               |                 |             |      |           |   |
|---------|-----------|------|---------|---------|---|---|---|---------|----------------|---------------|-----------------|-------------|------|-----------|---|
| At_chr5 | Cufflinks | exon | 4278318 | 4278500 | . | + | . | gene_id | "XLOC_073425"; | transcript_id | "Novel_000945"; | exon_number | "1"; | gene_type | " |
| At_chr5 | Cufflinks | exon | 4278792 | 4278877 | . | + | . | gene_id | "XLOC_073425"; | transcript_id | "Novel_000945"; | exon_number | "2"; | gene_type | " |
| At_chr5 | Cufflinks | exon | 4282267 | 4282585 | . | + | . | gene_id | "XLOC_073427"; | transcript_id | "Novel_000946"; | exon_number | "1"; | gene_type | " |
| At_chr5 | Cufflinks | exon | 4283018 | 4283195 | . | + | . | gene_id | "XLOC_073427"; | transcript_id | "Novel_000946"; | exon_number | "2"; | gene_type | " |
| At_chr5 | Cufflinks | exon | 4283308 | 4283370 | . | + | . | gene_id | "XLOC_073427"; | transcript_id | "Novel_000946"; | exon_number | "3"; | gene_type | " |
| At_chr5 | Cufflinks | exon | 4283505 | 4283610 | . | + | . | gene_id | "XLOC_073427"; | transcript_id | "Novel_000946"; | exon_number | "4"; | gene_type | " |
| At_chr5 | Cufflinks | exon | 4283784 | 4283888 | . | + | . | gene_id | "XLOC_073427"; | transcript_id | "Novel_000946"; | exon_number | "5"; | gene_type | " |
| At_chr5 | Cufflinks | exon | 4283976 | 4284052 | . | + | . | gene_id | "XLOC_073427"; | transcript_id | "Novel_000946"; | exon_number | "6"; | gene_type | " |
| At_chr5 | Cufflinks | exon | 4284148 | 4285270 | . | + | . | gene_id | "XLOC_073427"; | transcript_id | "Novel_000946"; | exon_number | "7"; | gene_type | " |
| At_chr5 | Cufflinks | exon | 4282270 | 4282585 | . | + | . | gene_id | "XLOC_073427"; | transcript_id | "Novel_000947"; | exon_number | "1"; | gene_type | " |
| At_chr5 | Cufflinks | exon | 4283018 | 4283195 | . | + | . | gene_id | "XLOC_073427"; | transcript_id | "Novel_000947"; | exon_number | "2"; | gene_type | " |
| At_chr5 | Cufflinks | exon | 4283308 | 4283370 | . | + | . | gene_id | "XLOC_073427"; | transcript_id | "Novel_000947"; | exon_number | "3"; | gene_type | " |
| At_chr5 | Cufflinks | exon | 4283505 | 4283610 | . | + | . | gene_id | "XLOC_073427"; | transcript_id | "Novel_000947"; | exon_number | "4"; | gene_type | " |
| At_chr5 | Cufflinks | exon | 4283784 | 4283888 | . | + | . | gene_id | "XLOC_073427"; | transcript_id | "Novel_000947"; | exon_number | "5"; | gene_type | " |
| At_chr5 | Cufflinks | exon | 4283976 | 4284052 | . | + | . | gene_id | "XLOC_073427"; | transcript_id | "Novel_000947"; | exon_number | "6"; | gene_type | " |
| At_chr5 | Cufflinks | exon | 4284148 | 4284262 | . | + | . | gene_id | "XLOC_073427"; | transcript_id | "Novel_000947"; | exon_number | "7"; | gene_type | " |
| At_chr5 | Cufflinks | exon | 4284850 | 4284922 | . | + | . | gene_id | "XLOC_073427"; | transcript_id | "Novel_000947"; | exon_number | "8"; | gene_type | " |
| At_chr5 | Cufflinks | exon | 4285287 | 4285624 | . | + | . | gene_id | "XLOC_073427"; | transcript_id | "Novel_000947"; | exon_number | "9"; | gene_type | " |
| At_chr5 | Cufflinks | exon | 4305375 | 4305592 | . | + | . | gene_id | "XLOC_073429"; | transcript_id | "Novel_000948"; | exon_number | "1"; | gene_type | " |
| At_chr5 | Cufflinks | exon | 4305692 | 4306551 | . | + | . | gene_id | "XLOC_073429"; | transcript_id | "Novel_000948"; | exon_number | "2"; | gene_type | " |
| At_chr5 | Cufflinks | exon | 7314253 | 7314340 | . | + | . | gene_id | "XLOC_073719"; | transcript_id | "Novel_000949"; | exon_number | "1"; | gene_type | " |
| At_chr5 | Cufflinks | exon | 7314422 | 7314476 | . | + | . | gene_id | "XLOC_073719"; | transcript_id | "Novel_000949"; | exon_number | "2"; | gene_type | " |
| At_chr5 | Cufflinks | exon | 7314814 | 7314866 | . | + | . | gene_id | "XLOC_073719"; | transcript_id | "Novel_000949"; | exon_number | "3"; | gene_type | " |
| At_chr5 | Cufflinks | exon | 7315162 | 7315200 | . | + | . | gene_id | "XLOC_073719"; | transcript_id | "Novel_000949"; | exon_number | "4"; | gene_type | " |
| At_chr5 | Cufflinks | exon | 7315330 | 7315399 | . | + | . | gene_id | "XLOC_073719"; | transcript_id | "Novel_000949"; | exon_number | "5"; | gene_type | " |
| At_chr5 | Cufflinks | exon | 7315663 | 7315805 | . | + | . | gene_id | "XLOC_073719"; | transcript_id | "Novel_000949"; | exon_number | "6"; | gene_type | " |
| At_chr5 | Cufflinks | exon | 7782788 | 7783693 | . | + | . | gene_id | "XLOC_073753"; | transcript_id | "Novel_000950"; | exon_number | "1"; | gene_type | " |
| At_chr5 | Cufflinks | exon | 7783807 | 7784013 | . | + | . | gene_id | "XLOC_073753"; | transcript_id | "Novel_000950"; | exon_number | "2"; | gene_type | " |
| At_chr5 | Cufflinks | exon | 8411342 | 8411686 | . | + | . | gene_id | "XLOC_073825"; | transcript_id | "Novel_000951"; | exon_number | "1"; | gene_type | " |
| At_chr5 | Cufflinks | exon | 8411780 | 8411828 | . | + | . | gene_id | "XLOC_073825"; | transcript_id | "Novel_000951"; | exon_number | "2"; | gene_type | " |
| At_chr5 | Cufflinks | exon | 8412007 | 8412292 | . | + | . | gene_id | "XLOC_073825"; | transcript_id | "Novel_000951"; | exon_number | "3"; | gene_type | " |
| At_chr5 | Cufflinks | exon | 8413226 | 8413542 | . | + | . | gene_id | "XLOC_073825"; | transcript_id | "Novel_000951"; | exon_number | "4"; | gene_type | " |
| At_chr5 | Cufflinks | exon | 8413998 | 8414106 | . | + | . | gene_id | "XLOC_073825"; | transcript_id | "Novel_000951"; | exon_number | "5"; | gene_type | " |
| At_chr5 | Cufflinks | exon | 8414205 | 8415118 | . | + | . | gene_id | "XLOC_073825"; | transcript_id | "Novel_000951"; | exon_number | "6"; | gene_type | " |
| At_chr5 | Cufflinks | exon | 8411342 | 8411686 | . | + | . | gene_id | "XLOC_073825"; | transcript_id | "Novel_000952"; | exon_number | "1"; | gene_type | " |

|         |           |      |          |          |   |   |   |         |                |               |                 |             |       |           |   |
|---------|-----------|------|----------|----------|---|---|---|---------|----------------|---------------|-----------------|-------------|-------|-----------|---|
| At_chr5 | Cufflinks | exon | 8411780  | 8411828  | . | + | . | gene_id | "XLOC_073825"; | transcript_id | "Novel_000952"; | exon_number | "2";  | gene_type | " |
| At_chr5 | Cufflinks | exon | 8412007  | 8412292  | . | + | . | gene_id | "XLOC_073825"; | transcript_id | "Novel_000952"; | exon_number | "3";  | gene_type | " |
| At_chr5 | Cufflinks | exon | 8413226  | 8413542  | . | + | . | gene_id | "XLOC_073825"; | transcript_id | "Novel_000952"; | exon_number | "4";  | gene_type | " |
| At_chr5 | Cufflinks | exon | 8413998  | 8415118  | . | + | . | gene_id | "XLOC_073825"; | transcript_id | "Novel_000952"; | exon_number | "5";  | gene_type | " |
| At_chr5 | Cufflinks | exon | 10007636 | 10007917 | . | + | . | gene_id | "XLOC_073954"; | transcript_id | "Novel_000953"; | exon_number | "1";  | gene_type | " |
| At_chr5 | Cufflinks | exon | 10008622 | 10008744 | . | + | . | gene_id | "XLOC_073954"; | transcript_id | "Novel_000953"; | exon_number | "2";  | gene_type | " |
| At_chr5 | Cufflinks | exon | 10008849 | 10008899 | . | + | . | gene_id | "XLOC_073954"; | transcript_id | "Novel_000953"; | exon_number | "3";  | gene_type | " |
| At_chr5 | Cufflinks | exon | 10009070 | 10009141 | . | + | . | gene_id | "XLOC_073954"; | transcript_id | "Novel_000953"; | exon_number | "4";  | gene_type | " |
| At_chr5 | Cufflinks | exon | 10009291 | 10009401 | . | + | . | gene_id | "XLOC_073954"; | transcript_id | "Novel_000953"; | exon_number | "5";  | gene_type | " |
| At_chr5 | Cufflinks | exon | 10009493 | 10009554 | . | + | . | gene_id | "XLOC_073954"; | transcript_id | "Novel_000953"; | exon_number | "6";  | gene_type | " |
| At_chr5 | Cufflinks | exon | 10010124 | 10010184 | . | + | . | gene_id | "XLOC_073954"; | transcript_id | "Novel_000953"; | exon_number | "7";  | gene_type | " |
| At_chr5 | Cufflinks | exon | 10010271 | 10010327 | . | + | . | gene_id | "XLOC_073954"; | transcript_id | "Novel_000953"; | exon_number | "8";  | gene_type | " |
| At_chr5 | Cufflinks | exon | 10010435 | 10010479 | . | + | . | gene_id | "XLOC_073954"; | transcript_id | "Novel_000953"; | exon_number | "9";  | gene_type | " |
| At_chr5 | Cufflinks | exon | 10011642 | 10012231 | . | + | . | gene_id | "XLOC_073954"; | transcript_id | "Novel_000953"; | exon_number | "10"; | gene_type | " |
| At_chr5 | Cufflinks | exon | 12294281 | 12294485 | . | + | . | gene_id | "XLOC_074102"; | transcript_id | "Novel_000954"; | exon_number | "1";  | gene_type | " |
| At_chr5 | Cufflinks | exon | 12298657 | 12299253 | . | + | . | gene_id | "XLOC_074102"; | transcript_id | "Novel_000954"; | exon_number | "2";  | gene_type | " |
| At_chr5 | Cufflinks | exon | 12968787 | 12969065 | . | + | . | gene_id | "XLOC_074153"; | transcript_id | "Novel_000955"; | exon_number | "1";  | gene_type | " |
| At_chr5 | Cufflinks | exon | 12969238 | 12969886 | . | + | . | gene_id | "XLOC_074153"; | transcript_id | "Novel_000955"; | exon_number | "2";  | gene_type | " |
| At_chr5 | Cufflinks | exon | 13670952 | 13671262 | . | + | . | gene_id | "XLOC_074245"; | transcript_id | "Novel_000956"; | exon_number | "1";  | gene_type | " |
| At_chr5 | Cufflinks | exon | 13672700 | 13674705 | . | + | . | gene_id | "XLOC_074245"; | transcript_id | "Novel_000956"; | exon_number | "2";  | gene_type | " |
| At_chr5 | Cufflinks | exon | 16271844 | 16272102 | . | + | . | gene_id | "XLOC_074338"; | transcript_id | "Novel_000957"; | exon_number | "1";  | gene_type | " |
| At_chr5 | Cufflinks | exon | 16272184 | 16272255 | . | + | . | gene_id | "XLOC_074338"; | transcript_id | "Novel_000957"; | exon_number | "2";  | gene_type | " |
| At_chr5 | Cufflinks | exon | 16272332 | 16272544 | . | + | . | gene_id | "XLOC_074338"; | transcript_id | "Novel_000957"; | exon_number | "3";  | gene_type | " |
| At_chr5 | Cufflinks | exon | 16275816 | 16276127 | . | + | . | gene_id | "XLOC_074338"; | transcript_id | "Novel_000957"; | exon_number | "4";  | gene_type | " |
| At_chr5 | Cufflinks | exon | 16590891 | 16591279 | . | + | . | gene_id | "XLOC_074373"; | transcript_id | "Novel_000958"; | exon_number | "1";  | gene_type | " |
| At_chr5 | Cufflinks | exon | 16591964 | 16592071 | . | + | . | gene_id | "XLOC_074373"; | transcript_id | "Novel_000958"; | exon_number | "2";  | gene_type | " |
| At_chr5 | Cufflinks | exon | 16592837 | 16592991 | . | + | . | gene_id | "XLOC_074373"; | transcript_id | "Novel_000958"; | exon_number | "3";  | gene_type | " |
| At_chr5 | Cufflinks | exon | 16593098 | 16595136 | . | + | . | gene_id | "XLOC_074373"; | transcript_id | "Novel_000958"; | exon_number | "4";  | gene_type | " |
| At_chr5 | Cufflinks | exon | 16595240 | 16595398 | . | + | . | gene_id | "XLOC_074373"; | transcript_id | "Novel_000958"; | exon_number | "5";  | gene_type | " |
| At_chr5 | Cufflinks | exon | 16595534 | 16595600 | . | + | . | gene_id | "XLOC_074373"; | transcript_id | "Novel_000958"; | exon_number | "6";  | gene_type | " |
| At_chr5 | Cufflinks | exon | 16596196 | 16596509 | . | + | . | gene_id | "XLOC_074373"; | transcript_id | "Novel_000958"; | exon_number | "7";  | gene_type | " |
| At_chr5 | Cufflinks | exon | 16590909 | 16591279 | . | + | . | gene_id | "XLOC_074373"; | transcript_id | "Novel_000959"; | exon_number | "1";  | gene_type | " |
| At_chr5 | Cufflinks | exon | 16591964 | 16592071 | . | + | . | gene_id | "XLOC_074373"; | transcript_id | "Novel_000959"; | exon_number | "2";  | gene_type | " |
| At_chr5 | Cufflinks | exon | 16592837 | 16592991 | . | + | . | gene_id | "XLOC_074373"; | transcript_id | "Novel_000959"; | exon_number | "3";  | gene_type | " |
| At_chr5 | Cufflinks | exon | 16593364 | 16593416 | . | + | . | gene_id | "XLOC_074373"; | transcript_id | "Novel_000959"; | exon_number | "4";  | gene_type | " |



|         |           |      |          |          |   |   |   |         |                |               |                 |             |       |           |   |
|---------|-----------|------|----------|----------|---|---|---|---------|----------------|---------------|-----------------|-------------|-------|-----------|---|
| At_chr5 | Cufflinks | exon | 38493309 | 38493400 | . | + | . | gene_id | "XLOC_075275"; | transcript_id | "Novel_000968"; | exon_number | "3";  | gene_type | " |
| At_chr5 | Cufflinks | exon | 38493526 | 38494440 | . | + | . | gene_id | "XLOC_075275"; | transcript_id | "Novel_000968"; | exon_number | "4";  | gene_type | " |
| At_chr5 | Cufflinks | exon | 38494521 | 38494969 | . | + | . | gene_id | "XLOC_075275"; | transcript_id | "Novel_000968"; | exon_number | "5";  | gene_type | " |
| At_chr5 | Cufflinks | exon | 38492905 | 38493400 | . | + | . | gene_id | "XLOC_075275"; | transcript_id | "Novel_000969"; | exon_number | "1";  | gene_type | " |
| At_chr5 | Cufflinks | exon | 38493526 | 38494440 | . | + | . | gene_id | "XLOC_075275"; | transcript_id | "Novel_000969"; | exon_number | "2";  | gene_type | " |
| At_chr5 | Cufflinks | exon | 38494521 | 38494968 | . | + | . | gene_id | "XLOC_075275"; | transcript_id | "Novel_000969"; | exon_number | "3";  | gene_type | " |
| At_chr5 | Cufflinks | exon | 38492969 | 38494440 | . | + | . | gene_id | "XLOC_075275"; | transcript_id | "Novel_000970"; | exon_number | "1";  | gene_type | " |
| At_chr5 | Cufflinks | exon | 38494521 | 38494963 | . | + | . | gene_id | "XLOC_075275"; | transcript_id | "Novel_000970"; | exon_number | "2";  | gene_type | " |
| At_chr5 | Cufflinks | exon | 38496716 | 38497076 | . | + | . | gene_id | "XLOC_075282"; | transcript_id | "Novel_000971"; | exon_number | "1";  | gene_type | " |
| At_chr5 | Cufflinks | exon | 38497247 | 38497457 | . | + | . | gene_id | "XLOC_075282"; | transcript_id | "Novel_000971"; | exon_number | "2";  | gene_type | " |
| At_chr5 | Cufflinks | exon | 38498067 | 38498332 | . | + | . | gene_id | "XLOC_075283"; | transcript_id | "Novel_000972"; | exon_number | "1";  | gene_type | " |
| At_chr5 | Cufflinks | exon | 38498436 | 38498675 | . | + | . | gene_id | "XLOC_075283"; | transcript_id | "Novel_000972"; | exon_number | "2";  | gene_type | " |
| At_chr5 | Cufflinks | exon | 38498805 | 38499271 | . | + | . | gene_id | "XLOC_075283"; | transcript_id | "Novel_000972"; | exon_number | "3";  | gene_type | " |
| At_chr5 | Cufflinks | exon | 38498366 | 38498675 | . | + | . | gene_id | "XLOC_075283"; | transcript_id | "Novel_000973"; | exon_number | "1";  | gene_type | " |
| At_chr5 | Cufflinks | exon | 38498805 | 38499256 | . | + | . | gene_id | "XLOC_075283"; | transcript_id | "Novel_000973"; | exon_number | "2";  | gene_type | " |
| At_chr5 | Cufflinks | exon | 38554881 | 38555066 | . | + | . | gene_id | "XLOC_075285"; | transcript_id | "Novel_000974"; | exon_number | "1";  | gene_type | " |
| At_chr5 | Cufflinks | exon | 38555179 | 38555211 | . | + | . | gene_id | "XLOC_075285"; | transcript_id | "Novel_000974"; | exon_number | "2";  | gene_type | " |
| At_chr5 | Cufflinks | exon | 38555320 | 38555420 | . | + | . | gene_id | "XLOC_075285"; | transcript_id | "Novel_000974"; | exon_number | "3";  | gene_type | " |
| At_chr5 | Cufflinks | exon | 38555505 | 38555620 | . | + | . | gene_id | "XLOC_075285"; | transcript_id | "Novel_000974"; | exon_number | "4";  | gene_type | " |
| At_chr5 | Cufflinks | exon | 38555713 | 38555812 | . | + | . | gene_id | "XLOC_075285"; | transcript_id | "Novel_000974"; | exon_number | "5";  | gene_type | " |
| At_chr5 | Cufflinks | exon | 38555894 | 38556101 | . | + | . | gene_id | "XLOC_075285"; | transcript_id | "Novel_000974"; | exon_number | "6";  | gene_type | " |
| At_chr5 | Cufflinks | exon | 38556188 | 38556291 | . | + | . | gene_id | "XLOC_075285"; | transcript_id | "Novel_000974"; | exon_number | "7";  | gene_type | " |
| At_chr5 | Cufflinks | exon | 38556381 | 38556523 | . | + | . | gene_id | "XLOC_075285"; | transcript_id | "Novel_000974"; | exon_number | "8";  | gene_type | " |
| At_chr5 | Cufflinks | exon | 38556618 | 38556701 | . | + | . | gene_id | "XLOC_075285"; | transcript_id | "Novel_000974"; | exon_number | "9";  | gene_type | " |
| At_chr5 | Cufflinks | exon | 38556795 | 38556884 | . | + | . | gene_id | "XLOC_075285"; | transcript_id | "Novel_000974"; | exon_number | "10"; | gene_type | " |
| At_chr5 | Cufflinks | exon | 38556977 | 38557212 | . | + | . | gene_id | "XLOC_075285"; | transcript_id | "Novel_000974"; | exon_number | "11"; | gene_type | " |
| At_chr5 | Cufflinks | exon | 39380908 | 39380931 | . | + | . | gene_id | "XLOC_075334"; | transcript_id | "Novel_000975"; | exon_number | "1";  | gene_type | " |
| At_chr5 | Cufflinks | exon | 39383121 | 39383177 | . | + | . | gene_id | "XLOC_075334"; | transcript_id | "Novel_000975"; | exon_number | "2";  | gene_type | " |
| At_chr5 | Cufflinks | exon | 39383280 | 39383465 | . | + | . | gene_id | "XLOC_075334"; | transcript_id | "Novel_000975"; | exon_number | "3";  | gene_type | " |
| At_chr5 | Cufflinks | exon | 43237272 | 43237384 | . | + | . | gene_id | "XLOC_075590"; | transcript_id | "Novel_000976"; | exon_number | "1";  | gene_type | " |
| At_chr5 | Cufflinks | exon | 43237464 | 43242004 | . | + | . | gene_id | "XLOC_075590"; | transcript_id | "Novel_000976"; | exon_number | "2";  | gene_type | " |
| At_chr5 | Cufflinks | exon | 43974300 | 43974455 | . | + | . | gene_id | "XLOC_075673"; | transcript_id | "Novel_000977"; | exon_number | "1";  | gene_type | " |
| At_chr5 | Cufflinks | exon | 43974539 | 43974899 | . | + | . | gene_id | "XLOC_075673"; | transcript_id | "Novel_000977"; | exon_number | "2";  | gene_type | " |
| At_chr5 | Cufflinks | exon | 43978974 | 43978997 | . | + | . | gene_id | "XLOC_075673"; | transcript_id | "Novel_000977"; | exon_number | "3";  | gene_type | " |
| At_chr5 | Cufflinks | exon | 43979082 | 43979125 | . | + | . | gene_id | "XLOC_075673"; | transcript_id | "Novel_000978"; | exon_number | "1";  | gene_type | " |





|         |           |      |          |          |   |   |   |         |                |               |                 |             |      |           |   |
|---------|-----------|------|----------|----------|---|---|---|---------|----------------|---------------|-----------------|-------------|------|-----------|---|
| At_chr5 | Cufflinks | exon | 51491284 | 51491372 | . | + | . | gene_id | "XLOC_076408"; | transcript_id | "Novel_000987"; | exon_number | "3"; | gene_type | " |
| At_chr5 | Cufflinks | exon | 51492583 | 51493178 | . | + | . | gene_id | "XLOC_076408"; | transcript_id | "Novel_000987"; | exon_number | "4"; | gene_type | " |
| At_chr5 | Cufflinks | exon | 51561964 | 51562112 | . | + | . | gene_id | "XLOC_076433"; | transcript_id | "Novel_000988"; | exon_number | "1"; | gene_type | " |
| At_chr5 | Cufflinks | exon | 51562212 | 51562321 | . | + | . | gene_id | "XLOC_076433"; | transcript_id | "Novel_000988"; | exon_number | "2"; | gene_type | " |
| At_chr5 | Cufflinks | exon | 51562503 | 51562993 | . | + | . | gene_id | "XLOC_076433"; | transcript_id | "Novel_000988"; | exon_number | "3"; | gene_type | " |
| At_chr5 | Cufflinks | exon | 51610295 | 51610554 | . | + | . | gene_id | "XLOC_076448"; | transcript_id | "Novel_000989"; | exon_number | "1"; | gene_type | " |
| At_chr5 | Cufflinks | exon | 51611477 | 51611570 | . | + | . | gene_id | "XLOC_076448"; | transcript_id | "Novel_000989"; | exon_number | "2"; | gene_type | " |
| At_chr5 | Cufflinks | exon | 51612254 | 51612323 | . | + | . | gene_id | "XLOC_076448"; | transcript_id | "Novel_000989"; | exon_number | "3"; | gene_type | " |
| At_chr5 | Cufflinks | exon | 51612448 | 51612822 | . | + | . | gene_id | "XLOC_076448"; | transcript_id | "Novel_000989"; | exon_number | "4"; | gene_type | " |
| At_chr5 | Cufflinks | exon | 51644337 | 51644411 | . | + | . | gene_id | "XLOC_076455"; | transcript_id | "Novel_000990"; | exon_number | "1"; | gene_type | " |
| At_chr5 | Cufflinks | exon | 51644597 | 51644736 | . | + | . | gene_id | "XLOC_076455"; | transcript_id | "Novel_000990"; | exon_number | "2"; | gene_type | " |
| At_chr5 | Cufflinks | exon | 51645662 | 51645787 | . | + | . | gene_id | "XLOC_076455"; | transcript_id | "Novel_000990"; | exon_number | "3"; | gene_type | " |
| At_chr5 | Cufflinks | exon | 51645915 | 51647671 | . | + | . | gene_id | "XLOC_076455"; | transcript_id | "Novel_000990"; | exon_number | "4"; | gene_type | " |
| At_chr5 | Cufflinks | exon | 51673044 | 51673265 | . | + | . | gene_id | "XLOC_076461"; | transcript_id | "Novel_000991"; | exon_number | "1"; | gene_type | " |
| At_chr5 | Cufflinks | exon | 51673383 | 51673404 | . | + | . | gene_id | "XLOC_076461"; | transcript_id | "Novel_000991"; | exon_number | "2"; | gene_type | " |
| At_chr5 | Cufflinks | exon | 51673503 | 51673608 | . | + | . | gene_id | "XLOC_076461"; | transcript_id | "Novel_000991"; | exon_number | "3"; | gene_type | " |
| At_chr5 | Cufflinks | exon | 51675122 | 51675229 | . | + | . | gene_id | "XLOC_076461"; | transcript_id | "Novel_000991"; | exon_number | "4"; | gene_type | " |
| At_chr5 | Cufflinks | exon | 51675641 | 51676104 | . | + | . | gene_id | "XLOC_076461"; | transcript_id | "Novel_000991"; | exon_number | "5"; | gene_type | " |
| At_chr5 | Cufflinks | exon | 51673045 | 51673404 | . | + | . | gene_id | "XLOC_076461"; | transcript_id | "Novel_000992"; | exon_number | "1"; | gene_type | " |
| At_chr5 | Cufflinks | exon | 51673503 | 51673658 | . | + | . | gene_id | "XLOC_076461"; | transcript_id | "Novel_000992"; | exon_number | "2"; | gene_type | " |
| At_chr5 | Cufflinks | exon | 1246572  | 1247677  | . | - | . | gene_id | "XLOC_076858"; | transcript_id | "Novel_000993"; | exon_number | "1"; | gene_type | " |
| At_chr5 | Cufflinks | exon | 1248340  | 1248411  | . | - | . | gene_id | "XLOC_076858"; | transcript_id | "Novel_000993"; | exon_number | "2"; | gene_type | " |
| At_chr5 | Cufflinks | exon | 1248500  | 1248642  | . | - | . | gene_id | "XLOC_076858"; | transcript_id | "Novel_000993"; | exon_number | "3"; | gene_type | " |
| At_chr5 | Cufflinks | exon | 1246589  | 1246638  | . | - | . | gene_id | "XLOC_076858"; | transcript_id | "Novel_000994"; | exon_number | "1"; | gene_type | " |
| At_chr5 | Cufflinks | exon | 1247573  | 1247677  | . | - | . | gene_id | "XLOC_076858"; | transcript_id | "Novel_000994"; | exon_number | "2"; | gene_type | " |
| At_chr5 | Cufflinks | exon | 1248353  | 1248411  | . | - | . | gene_id | "XLOC_076858"; | transcript_id | "Novel_000994"; | exon_number | "3"; | gene_type | " |
| At_chr5 | Cufflinks | exon | 1248500  | 1248714  | . | - | . | gene_id | "XLOC_076858"; | transcript_id | "Novel_000994"; | exon_number | "4"; | gene_type | " |
| At_chr5 | Cufflinks | exon | 1246589  | 1246638  | . | - | . | gene_id | "XLOC_076858"; | transcript_id | "Novel_000995"; | exon_number | "1"; | gene_type | " |
| At_chr5 | Cufflinks | exon | 1247573  | 1247677  | . | - | . | gene_id | "XLOC_076858"; | transcript_id | "Novel_000995"; | exon_number | "2"; | gene_type | " |
| At_chr5 | Cufflinks | exon | 1248340  | 1248411  | . | - | . | gene_id | "XLOC_076858"; | transcript_id | "Novel_000995"; | exon_number | "3"; | gene_type | " |
| At_chr5 | Cufflinks | exon | 1248500  | 1248714  | . | - | . | gene_id | "XLOC_076858"; | transcript_id | "Novel_000995"; | exon_number | "4"; | gene_type | " |
| At_chr5 | Cufflinks | exon | 1754121  | 1755148  | . | - | . | gene_id | "XLOC_076938"; | transcript_id | "Novel_000996"; | exon_number | "1"; | gene_type | " |
| At_chr5 | Cufflinks | exon | 1755969  | 1756238  | . | - | . | gene_id | "XLOC_076938"; | transcript_id | "Novel_000996"; | exon_number | "2"; | gene_type | " |
| At_chr5 | Cufflinks | exon | 1756321  | 1756847  | . | - | . | gene_id | "XLOC_076938"; | transcript_id | "Novel_000996"; | exon_number | "3"; | gene_type | " |
| At_chr5 | Cufflinks | exon | 2133774  | 2134486  | . | - | . | gene_id | "XLOC_076994"; | transcript_id | "Novel_000997"; | exon_number | "1"; | gene_type | " |





|         |           |      |          |          |   |   |         |                |               |                 |             |       |           |   |
|---------|-----------|------|----------|----------|---|---|---------|----------------|---------------|-----------------|-------------|-------|-----------|---|
| At_chr5 | Cufflinks | exon | 9925821  | 9925892  | . | . | gene_id | "XLOC_077756"; | transcript_id | "Novel_001011"; | exon_number | "7";  | gene_type | " |
| At_chr5 | Cufflinks | exon | 9926063  | 9926113  | . | . | gene_id | "XLOC_077756"; | transcript_id | "Novel_001011"; | exon_number | "8";  | gene_type | " |
| At_chr5 | Cufflinks | exon | 9926219  | 9926341  | . | . | gene_id | "XLOC_077756"; | transcript_id | "Novel_001011"; | exon_number | "9";  | gene_type | " |
| At_chr5 | Cufflinks | exon | 9926983  | 9927239  | . | . | gene_id | "XLOC_077756"; | transcript_id | "Novel_001011"; | exon_number | "10"; | gene_type | " |
| At_chr5 | Cufflinks | exon | 12261926 | 12262618 | . | . | gene_id | "XLOC_077901"; | transcript_id | "Novel_001012"; | exon_number | "1";  | gene_type | " |
| At_chr5 | Cufflinks | exon | 12263054 | 12263305 | . | . | gene_id | "XLOC_077901"; | transcript_id | "Novel_001012"; | exon_number | "2";  | gene_type | " |
| At_chr5 | Cufflinks | exon | 13515462 | 13515555 | . | . | gene_id | "XLOC_078001"; | transcript_id | "Novel_001013"; | exon_number | "1";  | gene_type | " |
| At_chr5 | Cufflinks | exon | 13516108 | 13516254 | . | . | gene_id | "XLOC_078001"; | transcript_id | "Novel_001013"; | exon_number | "2";  | gene_type | " |
| At_chr5 | Cufflinks | exon | 13517278 | 13517970 | . | . | gene_id | "XLOC_078001"; | transcript_id | "Novel_001013"; | exon_number | "3";  | gene_type | " |
| At_chr5 | Cufflinks | exon | 18969608 | 18969826 | . | . | gene_id | "XLOC_078238"; | transcript_id | "Novel_001014"; | exon_number | "1";  | gene_type | " |
| At_chr5 | Cufflinks | exon | 32489926 | 32490053 | . | . | gene_id | "XLOC_078713"; | transcript_id | "Novel_001015"; | exon_number | "1";  | gene_type | " |
| At_chr5 | Cufflinks | exon | 32490292 | 32490448 | . | . | gene_id | "XLOC_078713"; | transcript_id | "Novel_001015"; | exon_number | "2";  | gene_type | " |
| At_chr5 | Cufflinks | exon | 32491077 | 32491548 | . | . | gene_id | "XLOC_078713"; | transcript_id | "Novel_001015"; | exon_number | "3";  | gene_type | " |
| At_chr5 | Cufflinks | exon | 32489926 | 32490053 | . | . | gene_id | "XLOC_078713"; | transcript_id | "Novel_001016"; | exon_number | "1";  | gene_type | " |
| At_chr5 | Cufflinks | exon | 32490292 | 32490448 | . | . | gene_id | "XLOC_078713"; | transcript_id | "Novel_001016"; | exon_number | "2";  | gene_type | " |
| At_chr5 | Cufflinks | exon | 32491077 | 32491248 | . | . | gene_id | "XLOC_078713"; | transcript_id | "Novel_001016"; | exon_number | "3";  | gene_type | " |
| At_chr5 | Cufflinks | exon | 32492573 | 32493138 | . | . | gene_id | "XLOC_078713"; | transcript_id | "Novel_001016"; | exon_number | "4";  | gene_type | " |
| At_chr5 | Cufflinks | exon | 37341815 | 37342001 | . | . | gene_id | "XLOC_078906"; | transcript_id | "Novel_001017"; | exon_number | "1";  | gene_type | " |
| At_chr5 | Cufflinks | exon | 37342152 | 37343960 | . | . | gene_id | "XLOC_078906"; | transcript_id | "Novel_001017"; | exon_number | "2";  | gene_type | " |
| At_chr5 | Cufflinks | exon | 37345599 | 37345685 | . | . | gene_id | "XLOC_078907"; | transcript_id | "Novel_001018"; | exon_number | "1";  | gene_type | " |
| At_chr5 | Cufflinks | exon | 37346868 | 37347931 | . | . | gene_id | "XLOC_078907"; | transcript_id | "Novel_001018"; | exon_number | "2";  | gene_type | " |
| At_chr5 | Cufflinks | exon | 37731515 | 37732449 | . | . | gene_id | "XLOC_078919"; | transcript_id | "Novel_001019"; | exon_number | "1";  | gene_type | " |
| At_chr5 | Cufflinks | exon | 37733148 | 37733532 | . | . | gene_id | "XLOC_078919"; | transcript_id | "Novel_001019"; | exon_number | "2";  | gene_type | " |
| At_chr5 | Cufflinks | exon | 37733801 | 37734417 | . | . | gene_id | "XLOC_078919"; | transcript_id | "Novel_001019"; | exon_number | "3";  | gene_type | " |
| At_chr5 | Cufflinks | exon | 37731792 | 37732449 | . | . | gene_id | "XLOC_078919"; | transcript_id | "Novel_001020"; | exon_number | "1";  | gene_type | " |
| At_chr5 | Cufflinks | exon | 37733148 | 37734415 | . | . | gene_id | "XLOC_078919"; | transcript_id | "Novel_001020"; | exon_number | "2";  | gene_type | " |
| At_chr5 | Cufflinks | exon | 37731888 | 37733532 | . | . | gene_id | "XLOC_078919"; | transcript_id | "Novel_001021"; | exon_number | "1";  | gene_type | " |
| At_chr5 | Cufflinks | exon | 37733801 | 37734413 | . | . | gene_id | "XLOC_078919"; | transcript_id | "Novel_001021"; | exon_number | "2";  | gene_type | " |
| At_chr5 | Cufflinks | exon | 37734482 | 37735014 | . | . | gene_id | "XLOC_078920"; | transcript_id | "Novel_001022"; | exon_number | "1";  | gene_type | " |
| At_chr5 | Cufflinks | exon | 37735138 | 37735178 | . | . | gene_id | "XLOC_078920"; | transcript_id | "Novel_001022"; | exon_number | "2";  | gene_type | " |
| At_chr5 | Cufflinks | exon | 37736625 | 37736727 | . | . | gene_id | "XLOC_078920"; | transcript_id | "Novel_001022"; | exon_number | "3";  | gene_type | " |
| At_chr5 | Cufflinks | exon | 37734495 | 37734634 | . | . | gene_id | "XLOC_078920"; | transcript_id | "Novel_001023"; | exon_number | "1";  | gene_type | " |
| At_chr5 | Cufflinks | exon | 37734734 | 37735014 | . | . | gene_id | "XLOC_078920"; | transcript_id | "Novel_001023"; | exon_number | "2";  | gene_type | " |
| At_chr5 | Cufflinks | exon | 37735138 | 37736731 | . | . | gene_id | "XLOC_078920"; | transcript_id | "Novel_001023"; | exon_number | "3";  | gene_type | " |
| At_chr5 | Cufflinks | exon | 37734498 | 37734634 | . | . | gene_id | "XLOC_078920"; | transcript_id | "Novel_001024"; | exon_number | "1";  | gene_type | " |

|         |           |      |          |          |   |   |   |         |                |               |                 |             |      |           |   |
|---------|-----------|------|----------|----------|---|---|---|---------|----------------|---------------|-----------------|-------------|------|-----------|---|
| At_chr5 | Cufflinks | exon | 37734734 | 37736717 | . | - | . | gene_id | "XLOC_078920"; | transcript_id | "Novel_001024"; | exon_number | "2"; | gene_type | " |
| At_chr5 | Cufflinks | exon | 37785886 | 37786802 | . | - | . | gene_id | "XLOC_078925"; | transcript_id | "Novel_001025"; | exon_number | "1"; | gene_type | " |
| At_chr5 | Cufflinks | exon | 37797419 | 37797496 | . | - | . | gene_id | "XLOC_078925"; | transcript_id | "Novel_001025"; | exon_number | "2"; | gene_type | " |
| At_chr5 | Cufflinks | exon | 37797630 | 37798291 | . | - | . | gene_id | "XLOC_078925"; | transcript_id | "Novel_001025"; | exon_number | "3"; | gene_type | " |
| At_chr5 | Cufflinks | exon | 38040333 | 38040912 | . | - | . | gene_id | "XLOC_078946"; | transcript_id | "Novel_001026"; | exon_number | "1"; | gene_type | " |
| At_chr5 | Cufflinks | exon | 38040983 | 38041042 | . | - | . | gene_id | "XLOC_078946"; | transcript_id | "Novel_001026"; | exon_number | "2"; | gene_type | " |
| At_chr5 | Cufflinks | exon | 38041131 | 38041251 | . | - | . | gene_id | "XLOC_078946"; | transcript_id | "Novel_001026"; | exon_number | "3"; | gene_type | " |
| At_chr5 | Cufflinks | exon | 38041449 | 38041702 | . | - | . | gene_id | "XLOC_078946"; | transcript_id | "Novel_001026"; | exon_number | "4"; | gene_type | " |
| At_chr5 | Cufflinks | exon | 38106670 | 38108344 | . | - | . | gene_id | "XLOC_078951"; | transcript_id | "Novel_001027"; | exon_number | "1"; | gene_type | " |
| At_chr5 | Cufflinks | exon | 38108454 | 38108747 | . | - | . | gene_id | "XLOC_078951"; | transcript_id | "Novel_001027"; | exon_number | "2"; | gene_type | " |
| At_chr5 | Cufflinks | exon | 38108857 | 38108994 | . | - | . | gene_id | "XLOC_078951"; | transcript_id | "Novel_001027"; | exon_number | "3"; | gene_type | " |
| At_chr5 | Cufflinks | exon | 38109071 | 38109111 | . | - | . | gene_id | "XLOC_078951"; | transcript_id | "Novel_001027"; | exon_number | "4"; | gene_type | " |
| At_chr5 | Cufflinks | exon | 38107005 | 38108344 | . | - | . | gene_id | "XLOC_078951"; | transcript_id | "Novel_001028"; | exon_number | "1"; | gene_type | " |
| At_chr5 | Cufflinks | exon | 38108454 | 38108747 | . | - | . | gene_id | "XLOC_078951"; | transcript_id | "Novel_001028"; | exon_number | "2"; | gene_type | " |
| At_chr5 | Cufflinks | exon | 38108857 | 38108918 | . | - | . | gene_id | "XLOC_078951"; | transcript_id | "Novel_001028"; | exon_number | "3"; | gene_type | " |
| At_chr5 | Cufflinks | exon | 38109071 | 38109162 | . | - | . | gene_id | "XLOC_078951"; | transcript_id | "Novel_001028"; | exon_number | "4"; | gene_type | " |
| At_chr5 | Cufflinks | exon | 38107005 | 38108344 | . | - | . | gene_id | "XLOC_078951"; | transcript_id | "Novel_001029"; | exon_number | "1"; | gene_type | " |
| At_chr5 | Cufflinks | exon | 38108454 | 38108747 | . | - | . | gene_id | "XLOC_078951"; | transcript_id | "Novel_001029"; | exon_number | "2"; | gene_type | " |
| At_chr5 | Cufflinks | exon | 38108857 | 38108921 | . | - | . | gene_id | "XLOC_078951"; | transcript_id | "Novel_001029"; | exon_number | "3"; | gene_type | " |
| At_chr5 | Cufflinks | exon | 38109071 | 38109165 | . | - | . | gene_id | "XLOC_078951"; | transcript_id | "Novel_001029"; | exon_number | "4"; | gene_type | " |
| At_chr5 | Cufflinks | exon | 38107576 | 38108344 | . | - | . | gene_id | "XLOC_078951"; | transcript_id | "Novel_001030"; | exon_number | "1"; | gene_type | " |
| At_chr5 | Cufflinks | exon | 38108454 | 38108747 | . | - | . | gene_id | "XLOC_078951"; | transcript_id | "Novel_001030"; | exon_number | "2"; | gene_type | " |
| At_chr5 | Cufflinks | exon | 38108857 | 38108981 | . | - | . | gene_id | "XLOC_078951"; | transcript_id | "Novel_001030"; | exon_number | "3"; | gene_type | " |
| At_chr5 | Cufflinks | exon | 38109071 | 38109176 | . | - | . | gene_id | "XLOC_078951"; | transcript_id | "Novel_001030"; | exon_number | "4"; | gene_type | " |
| At_chr5 | Cufflinks | exon | 38203232 | 38203653 | . | - | . | gene_id | "XLOC_078956"; | transcript_id | "Novel_001031"; | exon_number | "1"; | gene_type | " |
| At_chr5 | Cufflinks | exon | 38203804 | 38204023 | . | - | . | gene_id | "XLOC_078956"; | transcript_id | "Novel_001031"; | exon_number | "2"; | gene_type | " |
| At_chr5 | Cufflinks | exon | 38358453 | 38359147 | . | - | . | gene_id | "XLOC_078977"; | transcript_id | "Novel_001032"; | exon_number | "1"; | gene_type | " |
| At_chr5 | Cufflinks | exon | 38360929 | 38361441 | . | - | . | gene_id | "XLOC_078977"; | transcript_id | "Novel_001032"; | exon_number | "2"; | gene_type | " |
| At_chr5 | Cufflinks | exon | 38361517 | 38362609 | . | - | . | gene_id | "XLOC_078977"; | transcript_id | "Novel_001033"; | exon_number | "1"; | gene_type | " |
| At_chr5 | Cufflinks | exon | 38362794 | 38363023 | . | - | . | gene_id | "XLOC_078977"; | transcript_id | "Novel_001033"; | exon_number | "2"; | gene_type | " |
| At_chr5 | Cufflinks | exon | 38474345 | 38475009 | . | - | . | gene_id | "XLOC_078988"; | transcript_id | "Novel_001034"; | exon_number | "1"; | gene_type | " |
| At_chr5 | Cufflinks | exon | 38475548 | 38475780 | . | - | . | gene_id | "XLOC_078988"; | transcript_id | "Novel_001034"; | exon_number | "2"; | gene_type | " |
| At_chr5 | Cufflinks | exon | 38476312 | 38476382 | . | - | . | gene_id | "XLOC_078988"; | transcript_id | "Novel_001034"; | exon_number | "3"; | gene_type | " |
| At_chr5 | Cufflinks | exon | 38477033 | 38477083 | . | - | . | gene_id | "XLOC_078988"; | transcript_id | "Novel_001034"; | exon_number | "4"; | gene_type | " |
| At_chr5 | Cufflinks | exon | 38478211 | 38478270 | . | - | . | gene_id | "XLOC_078988"; | transcript_id | "Novel_001034"; | exon_number | "5"; | gene_type | " |

|         |           |      |          |          |   |   |   |         |                |               |                 |             |      |           |   |
|---------|-----------|------|----------|----------|---|---|---|---------|----------------|---------------|-----------------|-------------|------|-----------|---|
| At_chr5 | Cufflinks | exon | 38478970 | 38479079 | . | - | . | gene_id | "XLOC_078988"; | transcript_id | "Novel_001034"; | exon_number | "6"; | gene_type | " |
| At_chr5 | Cufflinks | exon | 38479880 | 38480244 | . | - | . | gene_id | "XLOC_078988"; | transcript_id | "Novel_001034"; | exon_number | "7"; | gene_type | " |
| At_chr5 | Cufflinks | exon | 38475382 | 38476382 | . | - | . | gene_id | "XLOC_078988"; | transcript_id | "Novel_001035"; | exon_number | "1"; | gene_type | " |
| At_chr5 | Cufflinks | exon | 38477033 | 38477083 | . | - | . | gene_id | "XLOC_078988"; | transcript_id | "Novel_001035"; | exon_number | "2"; | gene_type | " |
| At_chr5 | Cufflinks | exon | 38478211 | 38478270 | . | - | . | gene_id | "XLOC_078988"; | transcript_id | "Novel_001035"; | exon_number | "3"; | gene_type | " |
| At_chr5 | Cufflinks | exon | 38478970 | 38479079 | . | - | . | gene_id | "XLOC_078988"; | transcript_id | "Novel_001035"; | exon_number | "4"; | gene_type | " |
| At_chr5 | Cufflinks | exon | 38479880 | 38480247 | . | - | . | gene_id | "XLOC_078988"; | transcript_id | "Novel_001035"; | exon_number | "5"; | gene_type | " |
| At_chr5 | Cufflinks | exon | 38477615 | 38478270 | . | - | . | gene_id | "XLOC_078988"; | transcript_id | "Novel_001036"; | exon_number | "1"; | gene_type | " |
| At_chr5 | Cufflinks | exon | 38478970 | 38479079 | . | - | . | gene_id | "XLOC_078988"; | transcript_id | "Novel_001036"; | exon_number | "2"; | gene_type | " |
| At_chr5 | Cufflinks | exon | 38479880 | 38480247 | . | - | . | gene_id | "XLOC_078988"; | transcript_id | "Novel_001036"; | exon_number | "3"; | gene_type | " |
| At_chr5 | Cufflinks | exon | 38501955 | 38502174 | . | - | . | gene_id | "XLOC_078993"; | transcript_id | "Novel_001037"; | exon_number | "1"; | gene_type | " |
| At_chr5 | Cufflinks | exon | 38502260 | 38502348 | . | - | . | gene_id | "XLOC_078993"; | transcript_id | "Novel_001037"; | exon_number | "2"; | gene_type | " |
| At_chr5 | Cufflinks | exon | 38502795 | 38502828 | . | - | . | gene_id | "XLOC_078993"; | transcript_id | "Novel_001037"; | exon_number | "3"; | gene_type | " |
| At_chr5 | Cufflinks | exon | 38691204 | 38692813 | . | - | . | gene_id | "XLOC_078999"; | transcript_id | "Novel_001038"; | exon_number | "1"; | gene_type | " |
| At_chr5 | Cufflinks | exon | 38693340 | 38693437 | . | - | . | gene_id | "XLOC_078999"; | transcript_id | "Novel_001038"; | exon_number | "2"; | gene_type | " |
| At_chr5 | Cufflinks | exon | 38693794 | 38693881 | . | - | . | gene_id | "XLOC_078999"; | transcript_id | "Novel_001038"; | exon_number | "3"; | gene_type | " |
| At_chr5 | Cufflinks | exon | 38693969 | 38694345 | . | - | . | gene_id | "XLOC_078999"; | transcript_id | "Novel_001038"; | exon_number | "4"; | gene_type | " |
| At_chr5 | Cufflinks | exon | 40803740 | 40804570 | . | - | . | gene_id | "XLOC_079134"; | transcript_id | "Novel_001039"; | exon_number | "1"; | gene_type | " |
| At_chr5 | Cufflinks | exon | 44547199 | 44548647 | . | - | . | gene_id | "XLOC_079365"; | transcript_id | "Novel_001040"; | exon_number | "1"; | gene_type | " |
| At_chr5 | Cufflinks | exon | 44550361 | 44550612 | . | - | . | gene_id | "XLOC_079365"; | transcript_id | "Novel_001040"; | exon_number | "2"; | gene_type | " |
| At_chr5 | Cufflinks | exon | 47085929 | 47087911 | . | - | . | gene_id | "XLOC_079561"; | transcript_id | "Novel_001041"; | exon_number | "1"; | gene_type | " |
| At_chr5 | Cufflinks | exon | 47088007 | 47088185 | . | - | . | gene_id | "XLOC_079561"; | transcript_id | "Novel_001041"; | exon_number | "2"; | gene_type | " |
| At_chr5 | Cufflinks | exon | 47096744 | 47096793 | . | - | . | gene_id | "XLOC_079561"; | transcript_id | "Novel_001041"; | exon_number | "3"; | gene_type | " |
| At_chr5 | Cufflinks | exon | 47099484 | 47099622 | . | - | . | gene_id | "XLOC_079561"; | transcript_id | "Novel_001041"; | exon_number | "4"; | gene_type | " |
| At_chr5 | Cufflinks | exon | 47099719 | 47099806 | . | - | . | gene_id | "XLOC_079561"; | transcript_id | "Novel_001041"; | exon_number | "5"; | gene_type | " |
| At_chr5 | Cufflinks | exon | 47101164 | 47101331 | . | - | . | gene_id | "XLOC_079561"; | transcript_id | "Novel_001041"; | exon_number | "6"; | gene_type | " |
| At_chr5 | Cufflinks | exon | 47101583 | 47101698 | . | - | . | gene_id | "XLOC_079561"; | transcript_id | "Novel_001041"; | exon_number | "7"; | gene_type | " |
| At_chr5 | Cufflinks | exon | 47096899 | 47099622 | . | - | . | gene_id | "XLOC_079561"; | transcript_id | "Novel_001042"; | exon_number | "1"; | gene_type | " |
| At_chr5 | Cufflinks | exon | 47099719 | 47099806 | . | - | . | gene_id | "XLOC_079561"; | transcript_id | "Novel_001042"; | exon_number | "2"; | gene_type | " |
| At_chr5 | Cufflinks | exon | 47101164 | 47101331 | . | - | . | gene_id | "XLOC_079561"; | transcript_id | "Novel_001042"; | exon_number | "3"; | gene_type | " |
| At_chr5 | Cufflinks | exon | 47101583 | 47101692 | . | - | . | gene_id | "XLOC_079561"; | transcript_id | "Novel_001042"; | exon_number | "4"; | gene_type | " |
| At_chr5 | Cufflinks | exon | 49200932 | 49201189 | . | - | . | gene_id | "XLOC_079749"; | transcript_id | "Novel_001043"; | exon_number | "1"; | gene_type | " |
| At_chr5 | Cufflinks | exon | 49201293 | 49201534 | . | - | . | gene_id | "XLOC_079749"; | transcript_id | "Novel_001043"; | exon_number | "2"; | gene_type | " |
| At_chr5 | Cufflinks | exon | 49200939 | 49201177 | . | - | . | gene_id | "XLOC_079749"; | transcript_id | "Novel_001044"; | exon_number | "1"; | gene_type | " |
| At_chr5 | Cufflinks | exon | 49201293 | 49201456 | . | - | . | gene_id | "XLOC_079749"; | transcript_id | "Novel_001044"; | exon_number | "2"; | gene_type | " |

|         |           |      |          |          |   |   |   |         |                |               |                 |             |      |           |   |
|---------|-----------|------|----------|----------|---|---|---|---------|----------------|---------------|-----------------|-------------|------|-----------|---|
| At_chr5 | Cufflinks | exon | 49534020 | 49536972 | . | - | . | gene_id | "XLOC_079792"; | transcript_id | "Novel_001045"; | exon_number | "1"; | gene_type | " |
| At_chr5 | Cufflinks | exon | 49537290 | 49537564 | . | - | . | gene_id | "XLOC_079792"; | transcript_id | "Novel_001045"; | exon_number | "2"; | gene_type | " |
| At_chr5 | Cufflinks | exon | 51501133 | 51501617 | . | - | . | gene_id | "XLOC_080035"; | transcript_id | "Novel_001046"; | exon_number | "1"; | gene_type | " |
| At_chr5 | Cufflinks | exon | 51501713 | 51501773 | . | - | . | gene_id | "XLOC_080035"; | transcript_id | "Novel_001046"; | exon_number | "2"; | gene_type | " |
| At_chr5 | Cufflinks | exon | 51549400 | 51549644 | . | - | . | gene_id | "XLOC_080047"; | transcript_id | "Novel_001047"; | exon_number | "1"; | gene_type | " |
| At_chr5 | Cufflinks | exon | 51549798 | 51550351 | . | - | . | gene_id | "XLOC_080047"; | transcript_id | "Novel_001047"; | exon_number | "2"; | gene_type | " |
| At_chr5 | Cufflinks | exon | 51646750 | 51647090 | . | - | . | gene_id | "XLOC_080062"; | transcript_id | "Novel_001048"; | exon_number | "1"; | gene_type | " |
| At_chr5 | Cufflinks | exon | 51648152 | 51648192 | . | - | . | gene_id | "XLOC_080062"; | transcript_id | "Novel_001048"; | exon_number | "2"; | gene_type | " |
| At_chr5 | Cufflinks | exon | 51648325 | 51648492 | . | - | . | gene_id | "XLOC_080062"; | transcript_id | "Novel_001048"; | exon_number | "3"; | gene_type | " |
| At_chr5 | Cufflinks | exon | 51646767 | 51648192 | . | - | . | gene_id | "XLOC_080062"; | transcript_id | "Novel_001049"; | exon_number | "1"; | gene_type | " |
| At_chr5 | Cufflinks | exon | 51648325 | 51648507 | . | - | . | gene_id | "XLOC_080062"; | transcript_id | "Novel_001049"; | exon_number | "2"; | gene_type | " |
| At_chr5 | Cufflinks | exon | 52802012 | 52802242 | . | - | . | gene_id | "XLOC_080167"; | transcript_id | "Novel_001050"; | exon_number | "1"; | gene_type | " |
| At_chr5 | Cufflinks | exon | 52810036 | 52810344 | . | - | . | gene_id | "XLOC_080169"; | transcript_id | "Novel_001051"; | exon_number | "1"; | gene_type | " |
| At_chr6 | Cufflinks | exon | 5658347  | 5659348  | . | + | . | gene_id | "XLOC_080931"; | transcript_id | "Novel_001052"; | exon_number | "1"; | gene_type | " |
| At_chr6 | Cufflinks | exon | 5659444  | 5659533  | . | + | . | gene_id | "XLOC_080931"; | transcript_id | "Novel_001052"; | exon_number | "2"; | gene_type | " |
| At_chr6 | Cufflinks | exon | 5659631  | 5659697  | . | + | . | gene_id | "XLOC_080931"; | transcript_id | "Novel_001052"; | exon_number | "3"; | gene_type | " |
| At_chr6 | Cufflinks | exon | 5659773  | 5659836  | . | + | . | gene_id | "XLOC_080931"; | transcript_id | "Novel_001052"; | exon_number | "4"; | gene_type | " |
| At_chr6 | Cufflinks | exon | 5659924  | 5660029  | . | + | . | gene_id | "XLOC_080931"; | transcript_id | "Novel_001052"; | exon_number | "5"; | gene_type | " |
| At_chr6 | Cufflinks | exon | 5664588  | 5664754  | . | + | . | gene_id | "XLOC_080931"; | transcript_id | "Novel_001052"; | exon_number | "6"; | gene_type | " |
| At_chr6 | Cufflinks | exon | 5664831  | 5664944  | . | + | . | gene_id | "XLOC_080931"; | transcript_id | "Novel_001052"; | exon_number | "7"; | gene_type | " |
| At_chr6 | Cufflinks | exon | 6801283  | 6801556  | . | + | . | gene_id | "XLOC_081037"; | transcript_id | "Novel_001053"; | exon_number | "1"; | gene_type | " |
| At_chr6 | Cufflinks | exon | 6801736  | 6801785  | . | + | . | gene_id | "XLOC_081037"; | transcript_id | "Novel_001053"; | exon_number | "2"; | gene_type | " |
| At_chr6 | Cufflinks | exon | 6802039  | 6802332  | . | + | . | gene_id | "XLOC_081037"; | transcript_id | "Novel_001053"; | exon_number | "3"; | gene_type | " |
| At_chr6 | Cufflinks | exon | 6804090  | 6804251  | . | + | . | gene_id | "XLOC_081037"; | transcript_id | "Novel_001053"; | exon_number | "4"; | gene_type | " |
| At_chr6 | Cufflinks | exon | 6805038  | 6806160  | . | + | . | gene_id | "XLOC_081037"; | transcript_id | "Novel_001053"; | exon_number | "5"; | gene_type | " |
| At_chr6 | Cufflinks | exon | 6801283  | 6802332  | . | + | . | gene_id | "XLOC_081037"; | transcript_id | "Novel_001054"; | exon_number | "1"; | gene_type | " |
| At_chr6 | Cufflinks | exon | 6804090  | 6804251  | . | + | . | gene_id | "XLOC_081037"; | transcript_id | "Novel_001054"; | exon_number | "2"; | gene_type | " |
| At_chr6 | Cufflinks | exon | 6805038  | 6806160  | . | + | . | gene_id | "XLOC_081037"; | transcript_id | "Novel_001054"; | exon_number | "3"; | gene_type | " |
| At_chr6 | Cufflinks | exon | 6801298  | 6801556  | . | + | . | gene_id | "XLOC_081037"; | transcript_id | "Novel_001055"; | exon_number | "1"; | gene_type | " |
| At_chr6 | Cufflinks | exon | 6802039  | 6802332  | . | + | . | gene_id | "XLOC_081037"; | transcript_id | "Novel_001055"; | exon_number | "2"; | gene_type | " |
| At_chr6 | Cufflinks | exon | 6804090  | 6804251  | . | + | . | gene_id | "XLOC_081037"; | transcript_id | "Novel_001055"; | exon_number | "3"; | gene_type | " |
| At_chr6 | Cufflinks | exon | 6805038  | 6806035  | . | + | . | gene_id | "XLOC_081037"; | transcript_id | "Novel_001055"; | exon_number | "4"; | gene_type | " |
| At_chr6 | Cufflinks | exon | 7156372  | 7156713  | . | + | . | gene_id | "XLOC_081065"; | transcript_id | "Novel_001056"; | exon_number | "1"; | gene_type | " |
| At_chr6 | Cufflinks | exon | 7158193  | 7158276  | . | + | . | gene_id | "XLOC_081065"; | transcript_id | "Novel_001056"; | exon_number | "2"; | gene_type | " |
| At_chr6 | Cufflinks | exon | 7158682  | 7158843  | . | + | . | gene_id | "XLOC_081065"; | transcript_id | "Novel_001056"; | exon_number | "3"; | gene_type | " |

|         |           |      |          |          |   |   |   |         |                |               |                 |             |       |           |   |
|---------|-----------|------|----------|----------|---|---|---|---------|----------------|---------------|-----------------|-------------|-------|-----------|---|
| At_chr6 | Cufflinks | exon | 7158949  | 7159066  | . | + | . | gene_id | "XLOC_081065"; | transcript_id | "Novel_001056"; | exon_number | "4";  | gene_type | " |
| At_chr6 | Cufflinks | exon | 7159521  | 7160128  | . | + | . | gene_id | "XLOC_081065"; | transcript_id | "Novel_001056"; | exon_number | "5";  | gene_type | " |
| At_chr6 | Cufflinks | exon | 7307910  | 7308124  | . | + | . | gene_id | "XLOC_081083"; | transcript_id | "Novel_001057"; | exon_number | "1";  | gene_type | " |
| At_chr6 | Cufflinks | exon | 7311426  | 7313858  | . | + | . | gene_id | "XLOC_081083"; | transcript_id | "Novel_001057"; | exon_number | "2";  | gene_type | " |
| At_chr6 | Cufflinks | exon | 7310449  | 7312497  | . | + | . | gene_id | "XLOC_081083"; | transcript_id | "Novel_001058"; | exon_number | "1";  | gene_type | " |
| At_chr6 | Cufflinks | exon | 7312604  | 7313969  | . | + | . | gene_id | "XLOC_081083"; | transcript_id | "Novel_001058"; | exon_number | "2";  | gene_type | " |
| At_chr6 | Cufflinks | exon | 9271671  | 9271814  | . | + | . | gene_id | "XLOC_081212"; | transcript_id | "Novel_001059"; | exon_number | "1";  | gene_type | " |
| At_chr6 | Cufflinks | exon | 9272062  | 9272439  | . | + | . | gene_id | "XLOC_081212"; | transcript_id | "Novel_001059"; | exon_number | "2";  | gene_type | " |
| At_chr6 | Cufflinks | exon | 9751430  | 9752113  | . | + | . | gene_id | "XLOC_081244"; | transcript_id | "Novel_001060"; | exon_number | "1";  | gene_type | " |
| At_chr6 | Cufflinks | exon | 9752262  | 9752503  | . | + | . | gene_id | "XLOC_081244"; | transcript_id | "Novel_001060"; | exon_number | "2";  | gene_type | " |
| At_chr6 | Cufflinks | exon | 9752719  | 9752763  | . | + | . | gene_id | "XLOC_081244"; | transcript_id | "Novel_001060"; | exon_number | "3";  | gene_type | " |
| At_chr6 | Cufflinks | exon | 9753412  | 9753478  | . | + | . | gene_id | "XLOC_081244"; | transcript_id | "Novel_001060"; | exon_number | "4";  | gene_type | " |
| At_chr6 | Cufflinks | exon | 9753707  | 9753778  | . | + | . | gene_id | "XLOC_081244"; | transcript_id | "Novel_001060"; | exon_number | "5";  | gene_type | " |
| At_chr6 | Cufflinks | exon | 9753974  | 9754227  | . | + | . | gene_id | "XLOC_081244"; | transcript_id | "Novel_001060"; | exon_number | "6";  | gene_type | " |
| At_chr6 | Cufflinks | exon | 9754309  | 9754366  | . | + | . | gene_id | "XLOC_081244"; | transcript_id | "Novel_001060"; | exon_number | "7";  | gene_type | " |
| At_chr6 | Cufflinks | exon | 9754500  | 9754667  | . | + | . | gene_id | "XLOC_081244"; | transcript_id | "Novel_001060"; | exon_number | "8";  | gene_type | " |
| At_chr6 | Cufflinks | exon | 9754839  | 9754913  | . | + | . | gene_id | "XLOC_081244"; | transcript_id | "Novel_001060"; | exon_number | "9";  | gene_type | " |
| At_chr6 | Cufflinks | exon | 9755070  | 9755106  | . | + | . | gene_id | "XLOC_081244"; | transcript_id | "Novel_001060"; | exon_number | "10"; | gene_type | " |
| At_chr6 | Cufflinks | exon | 9751837  | 9752113  | . | + | . | gene_id | "XLOC_081244"; | transcript_id | "Novel_001061"; | exon_number | "1";  | gene_type | " |
| At_chr6 | Cufflinks | exon | 9752262  | 9752503  | . | + | . | gene_id | "XLOC_081244"; | transcript_id | "Novel_001061"; | exon_number | "2";  | gene_type | " |
| At_chr6 | Cufflinks | exon | 9752719  | 9752763  | . | + | . | gene_id | "XLOC_081244"; | transcript_id | "Novel_001061"; | exon_number | "3";  | gene_type | " |
| At_chr6 | Cufflinks | exon | 9753412  | 9753478  | . | + | . | gene_id | "XLOC_081244"; | transcript_id | "Novel_001061"; | exon_number | "4";  | gene_type | " |
| At_chr6 | Cufflinks | exon | 9753707  | 9753778  | . | + | . | gene_id | "XLOC_081244"; | transcript_id | "Novel_001061"; | exon_number | "5";  | gene_type | " |
| At_chr6 | Cufflinks | exon | 9753974  | 9754227  | . | + | . | gene_id | "XLOC_081244"; | transcript_id | "Novel_001061"; | exon_number | "6";  | gene_type | " |
| At_chr6 | Cufflinks | exon | 9754309  | 9754366  | . | + | . | gene_id | "XLOC_081244"; | transcript_id | "Novel_001061"; | exon_number | "7";  | gene_type | " |
| At_chr6 | Cufflinks | exon | 9754500  | 9754667  | . | + | . | gene_id | "XLOC_081244"; | transcript_id | "Novel_001061"; | exon_number | "8";  | gene_type | " |
| At_chr6 | Cufflinks | exon | 9754839  | 9755839  | . | + | . | gene_id | "XLOC_081244"; | transcript_id | "Novel_001061"; | exon_number | "9";  | gene_type | " |
| At_chr6 | Cufflinks | exon | 11470505 | 11470676 | . | + | . | gene_id | "XLOC_081349"; | transcript_id | "Novel_001062"; | exon_number | "1";  | gene_type | " |
| At_chr6 | Cufflinks | exon | 11470863 | 11472428 | . | + | . | gene_id | "XLOC_081349"; | transcript_id | "Novel_001062"; | exon_number | "2";  | gene_type | " |
| At_chr6 | Cufflinks | exon | 11470513 | 11470676 | . | + | . | gene_id | "XLOC_081349"; | transcript_id | "Novel_001063"; | exon_number | "1";  | gene_type | " |
| At_chr6 | Cufflinks | exon | 11470840 | 11472428 | . | + | . | gene_id | "XLOC_081349"; | transcript_id | "Novel_001063"; | exon_number | "2";  | gene_type | " |
| At_chr6 | Cufflinks | exon | 12605761 | 12605970 | . | + | . | gene_id | "XLOC_081406"; | transcript_id | "Novel_001064"; | exon_number | "1";  | gene_type | " |
| At_chr6 | Cufflinks | exon | 12606041 | 12606889 | . | + | . | gene_id | "XLOC_081406"; | transcript_id | "Novel_001064"; | exon_number | "2";  | gene_type | " |
| At_chr6 | Cufflinks | exon | 12607022 | 12607046 | . | + | . | gene_id | "XLOC_081406"; | transcript_id | "Novel_001064"; | exon_number | "3";  | gene_type | " |
| At_chr6 | Cufflinks | exon | 16281952 | 16282636 | . | + | . | gene_id | "XLOC_081542"; | transcript_id | "Novel_001065"; | exon_number | "1";  | gene_type | " |



|         |           |      |          |          |   |   |   |         |                |               |                 |             |      |           |   |
|---------|-----------|------|----------|----------|---|---|---|---------|----------------|---------------|-----------------|-------------|------|-----------|---|
| At_chr6 | Cufflinks | exon | 16284075 | 16284299 | . | + | . | gene_id | "XLOC_081542"; | transcript_id | "Novel_001065"; | exon_number | "2"; | gene_type | " |
| At_chr6 | Cufflinks | exon | 16284410 | 16284977 | . | + | . | gene_id | "XLOC_081542"; | transcript_id | "Novel_001065"; | exon_number | "3"; | gene_type | " |
| At_chr6 | Cufflinks | exon | 16283568 | 16284299 | . | + | . | gene_id | "XLOC_081542"; | transcript_id | "Novel_001066"; | exon_number | "1"; | gene_type | " |
| At_chr6 | Cufflinks | exon | 16284410 | 16284751 | . | + | . | gene_id | "XLOC_081542"; | transcript_id | "Novel_001066"; | exon_number | "2"; | gene_type | " |
| At_chr6 | Cufflinks | exon | 16448051 | 16448997 | . | + | . | gene_id | "XLOC_081552"; | transcript_id | "Novel_001067"; | exon_number | "1"; | gene_type | " |
| At_chr6 | Cufflinks | exon | 16450820 | 16450983 | . | + | . | gene_id | "XLOC_081553"; | transcript_id | "Novel_001068"; | exon_number | "1"; | gene_type | " |
| At_chr6 | Cufflinks | exon | 16451571 | 16454488 | . | + | . | gene_id | "XLOC_081553"; | transcript_id | "Novel_001068"; | exon_number | "2"; | gene_type | " |
| At_chr6 | Cufflinks | exon | 21492446 | 21492502 | . | + | . | gene_id | "XLOC_081715"; | transcript_id | "Novel_001069"; | exon_number | "1"; | gene_type | " |
| At_chr6 | Cufflinks | exon | 21492677 | 21492976 | . | + | . | gene_id | "XLOC_081715"; | transcript_id | "Novel_001069"; | exon_number | "2"; | gene_type | " |
| At_chr6 | Cufflinks | exon | 21495127 | 21495172 | . | + | . | gene_id | "XLOC_081715"; | transcript_id | "Novel_001069"; | exon_number | "3"; | gene_type | " |
| At_chr6 | Cufflinks | exon | 21496526 | 21497358 | . | + | . | gene_id | "XLOC_081715"; | transcript_id | "Novel_001069"; | exon_number | "4"; | gene_type | " |
| At_chr6 | Cufflinks | exon | 30593149 | 30594162 | . | + | . | gene_id | "XLOC_082023"; | transcript_id | "Novel_001070"; | exon_number | "1"; | gene_type | " |
| At_chr6 | Cufflinks | exon | 32758190 | 32758871 | . | + | . | gene_id | "XLOC_082083"; | transcript_id | "Novel_001071"; | exon_number | "1"; | gene_type | " |
| At_chr6 | Cufflinks | exon | 32759344 | 32759424 | . | + | . | gene_id | "XLOC_082083"; | transcript_id | "Novel_001071"; | exon_number | "2"; | gene_type | " |
| At_chr6 | Cufflinks | exon | 32759938 | 32760288 | . | + | . | gene_id | "XLOC_082083"; | transcript_id | "Novel_001071"; | exon_number | "3"; | gene_type | " |
| At_chr6 | Cufflinks | exon | 33530365 | 33530493 | . | + | . | gene_id | "XLOC_082119"; | transcript_id | "Novel_001072"; | exon_number | "1"; | gene_type | " |
| At_chr6 | Cufflinks | exon | 33530831 | 33532089 | . | + | . | gene_id | "XLOC_082119"; | transcript_id | "Novel_001072"; | exon_number | "2"; | gene_type | " |
| At_chr6 | Cufflinks | exon | 35806281 | 35806751 | . | + | . | gene_id | "XLOC_082199"; | transcript_id | "Novel_001073"; | exon_number | "1"; | gene_type | " |
| At_chr6 | Cufflinks | exon | 35807254 | 35808989 | . | + | . | gene_id | "XLOC_082199"; | transcript_id | "Novel_001073"; | exon_number | "2"; | gene_type | " |
| At_chr6 | Cufflinks | exon | 35806567 | 35806751 | . | + | . | gene_id | "XLOC_082199"; | transcript_id | "Novel_001074"; | exon_number | "1"; | gene_type | " |
| At_chr6 | Cufflinks | exon | 35807254 | 35807409 | . | + | . | gene_id | "XLOC_082199"; | transcript_id | "Novel_001074"; | exon_number | "2"; | gene_type | " |
| At_chr6 | Cufflinks | exon | 35808578 | 35808992 | . | + | . | gene_id | "XLOC_082199"; | transcript_id | "Novel_001074"; | exon_number | "3"; | gene_type | " |
| At_chr6 | Cufflinks | exon | 35806569 | 35806751 | . | + | . | gene_id | "XLOC_082199"; | transcript_id | "Novel_001075"; | exon_number | "1"; | gene_type | " |
| At_chr6 | Cufflinks | exon | 35807254 | 35807409 | . | + | . | gene_id | "XLOC_082199"; | transcript_id | "Novel_001075"; | exon_number | "2"; | gene_type | " |
| At_chr6 | Cufflinks | exon | 35807612 | 35807692 | . | + | . | gene_id | "XLOC_082199"; | transcript_id | "Novel_001075"; | exon_number | "3"; | gene_type | " |
| At_chr6 | Cufflinks | exon | 35808578 | 35808989 | . | + | . | gene_id | "XLOC_082199"; | transcript_id | "Novel_001075"; | exon_number | "4"; | gene_type | " |
| At_chr6 | Cufflinks | exon | 37818414 | 37818569 | . | + | . | gene_id | "XLOC_082343"; | transcript_id | "Novel_001076"; | exon_number | "1"; | gene_type | " |
| At_chr6 | Cufflinks | exon | 37818837 | 37819898 | . | + | . | gene_id | "XLOC_082343"; | transcript_id | "Novel_001076"; | exon_number | "2"; | gene_type | " |
| At_chr6 | Cufflinks | exon | 37819994 | 37820164 | . | + | . | gene_id | "XLOC_082343"; | transcript_id | "Novel_001076"; | exon_number | "3"; | gene_type | " |
| At_chr6 | Cufflinks | exon | 37820485 | 37821119 | . | + | . | gene_id | "XLOC_082343"; | transcript_id | "Novel_001076"; | exon_number | "4"; | gene_type | " |
| At_chr6 | Cufflinks | exon | 37818468 | 37818581 | . | + | . | gene_id | "XLOC_082343"; | transcript_id | "Novel_001077"; | exon_number | "1"; | gene_type | " |
| At_chr6 | Cufflinks | exon | 37818837 | 37819672 | . | + | . | gene_id | "XLOC_082343"; | transcript_id | "Novel_001077"; | exon_number | "2"; | gene_type | " |
| At_chr6 | Cufflinks | exon | 37819764 | 37820937 | . | + | . | gene_id | "XLOC_082343"; | transcript_id | "Novel_001077"; | exon_number | "3"; | gene_type | " |
| At_chr6 | Cufflinks | exon | 40911344 | 40913033 | . | + | . | gene_id | "XLOC_082573"; | transcript_id | "Novel_001078"; | exon_number | "1"; | gene_type | " |
| At_chr6 | Cufflinks | exon | 40916833 | 40917653 | . | + | . | gene_id | "XLOC_082573"; | transcript_id | "Novel_001078"; | exon_number | "2"; | gene_type | " |

|         |           |      |          |          |   |   |   |         |                |               |                 |             |      |           |   |
|---------|-----------|------|----------|----------|---|---|---|---------|----------------|---------------|-----------------|-------------|------|-----------|---|
| At_chr6 | Cufflinks | exon | 42964448 | 42964553 | . | + | . | gene_id | "XLOC_082758"; | transcript_id | "Novel_001079"; | exon_number | "1"; | gene_type | " |
| At_chr6 | Cufflinks | exon | 42964668 | 42965857 | . | + | . | gene_id | "XLOC_082758"; | transcript_id | "Novel_001079"; | exon_number | "2"; | gene_type | " |
| At_chr6 | Cufflinks | exon | 43013385 | 43013567 | . | + | . | gene_id | "XLOC_082763"; | transcript_id | "Novel_001080"; | exon_number | "1"; | gene_type | " |
| At_chr6 | Cufflinks | exon | 43013693 | 43014397 | . | + | . | gene_id | "XLOC_082763"; | transcript_id | "Novel_001080"; | exon_number | "2"; | gene_type | " |
| At_chr6 | Cufflinks | exon | 44923654 | 44923958 | . | + | . | gene_id | "XLOC_082962"; | transcript_id | "Novel_001081"; | exon_number | "1"; | gene_type | " |
| At_chr6 | Cufflinks | exon | 44924038 | 44927275 | . | + | . | gene_id | "XLOC_082962"; | transcript_id | "Novel_001081"; | exon_number | "2"; | gene_type | " |
| At_chr6 | Cufflinks | exon | 44923661 | 44925735 | . | + | . | gene_id | "XLOC_082962"; | transcript_id | "Novel_001082"; | exon_number | "1"; | gene_type | " |
| At_chr6 | Cufflinks | exon | 44926766 | 44927985 | . | + | . | gene_id | "XLOC_082962"; | transcript_id | "Novel_001082"; | exon_number | "2"; | gene_type | " |
| At_chr6 | Cufflinks | exon | 46161318 | 46161391 | . | + | . | gene_id | "XLOC_083128"; | transcript_id | "Novel_001083"; | exon_number | "1"; | gene_type | " |
| At_chr6 | Cufflinks | exon | 46161479 | 46161606 | . | + | . | gene_id | "XLOC_083128"; | transcript_id | "Novel_001083"; | exon_number | "2"; | gene_type | " |
| At_chr6 | Cufflinks | exon | 47826168 | 47826785 | . | + | . | gene_id | "XLOC_083270"; | transcript_id | "Novel_001084"; | exon_number | "1"; | gene_type | " |
| At_chr6 | Cufflinks | exon | 47828312 | 47828868 | . | + | . | gene_id | "XLOC_083270"; | transcript_id | "Novel_001084"; | exon_number | "2"; | gene_type | " |
| At_chr6 | Cufflinks | exon | 47889834 | 47890300 | . | + | . | gene_id | "XLOC_083279"; | transcript_id | "Novel_001085"; | exon_number | "1"; | gene_type | " |
| At_chr6 | Cufflinks | exon | 47890903 | 47890993 | . | + | . | gene_id | "XLOC_083279"; | transcript_id | "Novel_001085"; | exon_number | "2"; | gene_type | " |
| At_chr6 | Cufflinks | exon | 47912462 | 47912568 | . | + | . | gene_id | "XLOC_083284"; | transcript_id | "Novel_001086"; | exon_number | "1"; | gene_type | " |
| At_chr6 | Cufflinks | exon | 47912780 | 47912950 | . | + | . | gene_id | "XLOC_083284"; | transcript_id | "Novel_001086"; | exon_number | "2"; | gene_type | " |
| At_chr6 | Cufflinks | exon | 50040606 | 50042617 | . | + | . | gene_id | "XLOC_083587"; | transcript_id | "Novel_001087"; | exon_number | "1"; | gene_type | " |
| At_chr6 | Cufflinks | exon | 50043021 | 50043710 | . | + | . | gene_id | "XLOC_083587"; | transcript_id | "Novel_001087"; | exon_number | "2"; | gene_type | " |
| At_chr6 | Cufflinks | exon | 52867672 | 52867900 | . | + | . | gene_id | "XLOC_083898"; | transcript_id | "Novel_001088"; | exon_number | "1"; | gene_type | " |
| At_chr6 | Cufflinks | exon | 52868154 | 52872551 | . | + | . | gene_id | "XLOC_083898"; | transcript_id | "Novel_001088"; | exon_number | "2"; | gene_type | " |
| At_chr6 | Cufflinks | exon | 52867673 | 52867900 | . | + | . | gene_id | "XLOC_083898"; | transcript_id | "Novel_001089"; | exon_number | "1"; | gene_type | " |
| At_chr6 | Cufflinks | exon | 52868154 | 52868313 | . | + | . | gene_id | "XLOC_083898"; | transcript_id | "Novel_001089"; | exon_number | "2"; | gene_type | " |
| At_chr6 | Cufflinks | exon | 52868476 | 52868527 | . | + | . | gene_id | "XLOC_083898"; | transcript_id | "Novel_001089"; | exon_number | "3"; | gene_type | " |
| At_chr6 | Cufflinks | exon | 52868610 | 52872509 | . | + | . | gene_id | "XLOC_083898"; | transcript_id | "Novel_001089"; | exon_number | "4"; | gene_type | " |
| At_chr6 | Cufflinks | exon | 53679969 | 53680232 | . | + | . | gene_id | "XLOC_084005"; | transcript_id | "Novel_001090"; | exon_number | "1"; | gene_type | " |
| At_chr6 | Cufflinks | exon | 53787784 | 53788114 | . | + | . | gene_id | "XLOC_084017"; | transcript_id | "Novel_001091"; | exon_number | "1"; | gene_type | " |
| At_chr6 | Cufflinks | exon | 53790512 | 53794023 | . | + | . | gene_id | "XLOC_084017"; | transcript_id | "Novel_001091"; | exon_number | "2"; | gene_type | " |
| At_chr6 | Cufflinks | exon | 54257573 | 54261297 | . | + | . | gene_id | "XLOC_084086"; | transcript_id | "Novel_001092"; | exon_number | "1"; | gene_type | " |
| At_chr6 | Cufflinks | exon | 54261416 | 54261535 | . | + | . | gene_id | "XLOC_084086"; | transcript_id | "Novel_001092"; | exon_number | "2"; | gene_type | " |
| At_chr6 | Cufflinks | exon | 54262258 | 54262405 | . | + | . | gene_id | "XLOC_084086"; | transcript_id | "Novel_001092"; | exon_number | "3"; | gene_type | " |
| At_chr6 | Cufflinks | exon | 54262648 | 54263057 | . | + | . | gene_id | "XLOC_084086"; | transcript_id | "Novel_001092"; | exon_number | "4"; | gene_type | " |
| At_chr6 | Cufflinks | exon | 54263159 | 54263391 | . | + | . | gene_id | "XLOC_084086"; | transcript_id | "Novel_001093"; | exon_number | "1"; | gene_type | " |
| At_chr6 | Cufflinks | exon | 54263463 | 54264585 | . | + | . | gene_id | "XLOC_084086"; | transcript_id | "Novel_001093"; | exon_number | "2"; | gene_type | " |
| At_chr6 | Cufflinks | exon | 54263164 | 54264387 | . | + | . | gene_id | "XLOC_084086"; | transcript_id | "Novel_001094"; | exon_number | "1"; | gene_type | " |
| At_chr6 | Cufflinks | exon | 54264474 | 54264611 | . | + | . | gene_id | "XLOC_084086"; | transcript_id | "Novel_001094"; | exon_number | "2"; | gene_type | " |

|         |           |      |          |          |   |   |   |         |                |               |                 |             |      |           |   |
|---------|-----------|------|----------|----------|---|---|---|---------|----------------|---------------|-----------------|-------------|------|-----------|---|
| At_chr6 | Cufflinks | exon | 54264810 | 54265717 | . | + | . | gene_id | "XLOC_084086"; | transcript_id | "Novel_001094"; | exon_number | "3"; | gene_type | " |
| At_chr6 | Cufflinks | exon | 54263178 | 54263391 | . | + | . | gene_id | "XLOC_084086"; | transcript_id | "Novel_001095"; | exon_number | "1"; | gene_type | " |
| At_chr6 | Cufflinks | exon | 54263463 | 54263875 | . | + | . | gene_id | "XLOC_084086"; | transcript_id | "Novel_001095"; | exon_number | "2"; | gene_type | " |
| At_chr6 | Cufflinks | exon | 54264289 | 54264387 | . | + | . | gene_id | "XLOC_084086"; | transcript_id | "Novel_001095"; | exon_number | "3"; | gene_type | " |
| At_chr6 | Cufflinks | exon | 54264474 | 54264611 | . | + | . | gene_id | "XLOC_084086"; | transcript_id | "Novel_001095"; | exon_number | "4"; | gene_type | " |
| At_chr6 | Cufflinks | exon | 54264810 | 54266007 | . | + | . | gene_id | "XLOC_084086"; | transcript_id | "Novel_001095"; | exon_number | "5"; | gene_type | " |
| At_chr6 | Cufflinks | exon | 54266840 | 54268086 | . | + | . | gene_id | "XLOC_084087"; | transcript_id | "Novel_001096"; | exon_number | "1"; | gene_type | " |
| At_chr6 | Cufflinks | exon | 54275222 | 54275804 | . | + | . | gene_id | "XLOC_084091"; | transcript_id | "Novel_001097"; | exon_number | "1"; | gene_type | " |
| At_chr6 | Cufflinks | exon | 54275904 | 54276523 | . | + | . | gene_id | "XLOC_084091"; | transcript_id | "Novel_001097"; | exon_number | "2"; | gene_type | " |
| At_chr6 | Cufflinks | exon | 54313464 | 54313590 | . | + | . | gene_id | "XLOC_084097"; | transcript_id | "Novel_001098"; | exon_number | "1"; | gene_type | " |
| At_chr6 | Cufflinks | exon | 54314883 | 54315676 | . | + | . | gene_id | "XLOC_084097"; | transcript_id | "Novel_001098"; | exon_number | "2"; | gene_type | " |
| At_chr6 | Cufflinks | exon | 54336456 | 54336520 | . | + | . | gene_id | "XLOC_084106"; | transcript_id | "Novel_001099"; | exon_number | "1"; | gene_type | " |
| At_chr6 | Cufflinks | exon | 54336772 | 54337391 | . | + | . | gene_id | "XLOC_084106"; | transcript_id | "Novel_001099"; | exon_number | "2"; | gene_type | " |
| At_chr6 | Cufflinks | exon | 54336456 | 54336520 | . | + | . | gene_id | "XLOC_084106"; | transcript_id | "Novel_001100"; | exon_number | "1"; | gene_type | " |
| At_chr6 | Cufflinks | exon | 54336772 | 54337306 | . | + | . | gene_id | "XLOC_084106"; | transcript_id | "Novel_001100"; | exon_number | "2"; | gene_type | " |
| At_chr6 | Cufflinks | exon | 54337476 | 54337664 | . | + | . | gene_id | "XLOC_084106"; | transcript_id | "Novel_001100"; | exon_number | "3"; | gene_type | " |
| At_chr6 | Cufflinks | exon | 54337742 | 54338118 | . | + | . | gene_id | "XLOC_084106"; | transcript_id | "Novel_001100"; | exon_number | "4"; | gene_type | " |
| At_chr6 | Cufflinks | exon | 54336607 | 54336610 | . | + | . | gene_id | "XLOC_084106"; | transcript_id | "Novel_001101"; | exon_number | "1"; | gene_type | " |
| At_chr6 | Cufflinks | exon | 54336772 | 54337306 | . | + | . | gene_id | "XLOC_084106"; | transcript_id | "Novel_001101"; | exon_number | "2"; | gene_type | " |
| At_chr6 | Cufflinks | exon | 54337476 | 54337664 | . | + | . | gene_id | "XLOC_084106"; | transcript_id | "Novel_001101"; | exon_number | "3"; | gene_type | " |
| At_chr6 | Cufflinks | exon | 54337742 | 54338059 | . | + | . | gene_id | "XLOC_084106"; | transcript_id | "Novel_001101"; | exon_number | "4"; | gene_type | " |
| At_chr6 | Cufflinks | exon | 54336648 | 54337306 | . | + | . | gene_id | "XLOC_084106"; | transcript_id | "Novel_001102"; | exon_number | "1"; | gene_type | " |
| At_chr6 | Cufflinks | exon | 54337476 | 54337664 | . | + | . | gene_id | "XLOC_084106"; | transcript_id | "Novel_001102"; | exon_number | "2"; | gene_type | " |
| At_chr6 | Cufflinks | exon | 54337742 | 54338118 | . | + | . | gene_id | "XLOC_084106"; | transcript_id | "Novel_001102"; | exon_number | "3"; | gene_type | " |
| At_chr6 | Cufflinks | exon | 54490664 | 54490993 | . | + | . | gene_id | "XLOC_084133"; | transcript_id | "Novel_001103"; | exon_number | "1"; | gene_type | " |
| At_chr6 | Cufflinks | exon | 54492325 | 54492542 | . | + | . | gene_id | "XLOC_084133"; | transcript_id | "Novel_001103"; | exon_number | "2"; | gene_type | " |
| At_chr6 | Cufflinks | exon | 54492619 | 54492798 | . | + | . | gene_id | "XLOC_084133"; | transcript_id | "Novel_001103"; | exon_number | "3"; | gene_type | " |
| At_chr6 | Cufflinks | exon | 54492314 | 54492542 | . | + | . | gene_id | "XLOC_084133"; | transcript_id | "Novel_001104"; | exon_number | "1"; | gene_type | " |
| At_chr6 | Cufflinks | exon | 54492619 | 54492803 | . | + | . | gene_id | "XLOC_084133"; | transcript_id | "Novel_001104"; | exon_number | "2"; | gene_type | " |
| At_chr6 | Cufflinks | exon | 54493108 | 54493163 | . | + | . | gene_id | "XLOC_084138"; | transcript_id | "Novel_001105"; | exon_number | "1"; | gene_type | " |
| At_chr6 | Cufflinks | exon | 54493252 | 54494328 | . | + | . | gene_id | "XLOC_084138"; | transcript_id | "Novel_001105"; | exon_number | "2"; | gene_type | " |
| At_chr6 | Cufflinks | exon | 54551467 | 54551949 | . | + | . | gene_id | "XLOC_084156"; | transcript_id | "Novel_001106"; | exon_number | "1"; | gene_type | " |
| At_chr6 | Cufflinks | exon | 54553229 | 54553888 | . | + | . | gene_id | "XLOC_084156"; | transcript_id | "Novel_001106"; | exon_number | "2"; | gene_type | " |
| At_chr6 | Cufflinks | exon | 54551475 | 54551949 | . | + | . | gene_id | "XLOC_084156"; | transcript_id | "Novel_001107"; | exon_number | "1"; | gene_type | " |
| At_chr6 | Cufflinks | exon | 54553229 | 54553361 | . | + | . | gene_id | "XLOC_084156"; | transcript_id | "Novel_001107"; | exon_number | "2"; | gene_type | " |

|         |           |      |          |          |   |   |   |         |                |               |                 |             |      |           |   |
|---------|-----------|------|----------|----------|---|---|---|---------|----------------|---------------|-----------------|-------------|------|-----------|---|
| At_chr6 | Cufflinks | exon | 54553891 | 54554913 | . | + | . | gene_id | "XLOC_084156"; | transcript_id | "Novel_001107"; | exon_number | "3"; | gene_type | " |
| At_chr6 | Cufflinks | exon | 54619344 | 54619525 | . | + | . | gene_id | "XLOC_084171"; | transcript_id | "Novel_001108"; | exon_number | "1"; | gene_type | " |
| At_chr6 | Cufflinks | exon | 54619643 | 54619729 | . | + | . | gene_id | "XLOC_084171"; | transcript_id | "Novel_001108"; | exon_number | "2"; | gene_type | " |
| At_chr6 | Cufflinks | exon | 54620336 | 54620359 | . | + | . | gene_id | "XLOC_084172"; | transcript_id | "Novel_001109"; | exon_number | "1"; | gene_type | " |
| At_chr6 | Cufflinks | exon | 54620456 | 54620671 | . | + | . | gene_id | "XLOC_084172"; | transcript_id | "Novel_001109"; | exon_number | "2"; | gene_type | " |
| At_chr6 | Cufflinks | exon | 54652626 | 54653096 | . | + | . | gene_id | "XLOC_084177"; | transcript_id | "Novel_001110"; | exon_number | "1"; | gene_type | " |
| At_chr6 | Cufflinks | exon | 54653176 | 54653475 | . | + | . | gene_id | "XLOC_084177"; | transcript_id | "Novel_001110"; | exon_number | "2"; | gene_type | " |
| At_chr6 | Cufflinks | exon | 54698972 | 54700767 | . | + | . | gene_id | "XLOC_084183"; | transcript_id | "Novel_001111"; | exon_number | "1"; | gene_type | " |
| At_chr6 | Cufflinks | exon | 54701096 | 54701455 | . | + | . | gene_id | "XLOC_084183"; | transcript_id | "Novel_001111"; | exon_number | "2"; | gene_type | " |
| At_chr6 | Cufflinks | exon | 54699017 | 54703735 | . | + | . | gene_id | "XLOC_084183"; | transcript_id | "Novel_001112"; | exon_number | "1"; | gene_type | " |
| At_chr6 | Cufflinks | exon | 54704080 | 54706213 | . | + | . | gene_id | "XLOC_084183"; | transcript_id | "Novel_001112"; | exon_number | "2"; | gene_type | " |
| At_chr6 | Cufflinks | exon | 54723945 | 54725432 | . | + | . | gene_id | "XLOC_084184"; | transcript_id | "Novel_001113"; | exon_number | "1"; | gene_type | " |
| At_chr6 | Cufflinks | exon | 54740250 | 54740898 | . | + | . | gene_id | "XLOC_084184"; | transcript_id | "Novel_001114"; | exon_number | "1"; | gene_type | " |
| At_chr6 | Cufflinks | exon | 54740979 | 54743269 | . | + | . | gene_id | "XLOC_084184"; | transcript_id | "Novel_001114"; | exon_number | "2"; | gene_type | " |
| At_chr6 | Cufflinks | exon | 54743951 | 54744097 | . | + | . | gene_id | "XLOC_084184"; | transcript_id | "Novel_001114"; | exon_number | "3"; | gene_type | " |
| At_chr6 | Cufflinks | exon | 54744348 | 54745442 | . | + | . | gene_id | "XLOC_084184"; | transcript_id | "Novel_001114"; | exon_number | "4"; | gene_type | " |
| At_chr6 | Cufflinks | exon | 54740308 | 54742681 | . | + | . | gene_id | "XLOC_084184"; | transcript_id | "Novel_001115"; | exon_number | "1"; | gene_type | " |
| At_chr6 | Cufflinks | exon | 54742976 | 54743283 | . | + | . | gene_id | "XLOC_084184"; | transcript_id | "Novel_001115"; | exon_number | "2"; | gene_type | " |
| At_chr6 | Cufflinks | exon | 54740308 | 54740898 | . | + | . | gene_id | "XLOC_084184"; | transcript_id | "Novel_001116"; | exon_number | "1"; | gene_type | " |
| At_chr6 | Cufflinks | exon | 54740979 | 54742681 | . | + | . | gene_id | "XLOC_084184"; | transcript_id | "Novel_001116"; | exon_number | "2"; | gene_type | " |
| At_chr6 | Cufflinks | exon | 54742976 | 54743269 | . | + | . | gene_id | "XLOC_084184"; | transcript_id | "Novel_001116"; | exon_number | "3"; | gene_type | " |
| At_chr6 | Cufflinks | exon | 54743951 | 54744097 | . | + | . | gene_id | "XLOC_084184"; | transcript_id | "Novel_001116"; | exon_number | "4"; | gene_type | " |
| At_chr6 | Cufflinks | exon | 54744348 | 54744492 | . | + | . | gene_id | "XLOC_084184"; | transcript_id | "Novel_001116"; | exon_number | "5"; | gene_type | " |
| At_chr6 | Cufflinks | exon | 54747706 | 54747918 | . | + | . | gene_id | "XLOC_084184"; | transcript_id | "Novel_001117"; | exon_number | "1"; | gene_type | " |
| At_chr6 | Cufflinks | exon | 54748199 | 54748252 | . | + | . | gene_id | "XLOC_084184"; | transcript_id | "Novel_001117"; | exon_number | "2"; | gene_type | " |
| At_chr6 | Cufflinks | exon | 54748623 | 54750720 | . | + | . | gene_id | "XLOC_084184"; | transcript_id | "Novel_001117"; | exon_number | "3"; | gene_type | " |
| At_chr6 | Cufflinks | exon | 54750796 | 54752339 | . | + | . | gene_id | "XLOC_084184"; | transcript_id | "Novel_001117"; | exon_number | "4"; | gene_type | " |
| At_chr6 | Cufflinks | exon | 54748207 | 54748252 | . | + | . | gene_id | "XLOC_084184"; | transcript_id | "Novel_001118"; | exon_number | "1"; | gene_type | " |
| At_chr6 | Cufflinks | exon | 54748623 | 54749893 | . | + | . | gene_id | "XLOC_084184"; | transcript_id | "Novel_001118"; | exon_number | "2"; | gene_type | " |
| At_chr6 | Cufflinks | exon | 54750646 | 54750940 | . | + | . | gene_id | "XLOC_084184"; | transcript_id | "Novel_001118"; | exon_number | "3"; | gene_type | " |
| At_chr6 | Cufflinks | exon | 54748595 | 54751567 | . | + | . | gene_id | "XLOC_084184"; | transcript_id | "Novel_001119"; | exon_number | "1"; | gene_type | " |
| At_chr6 | Cufflinks | exon | 54751876 | 54752201 | . | + | . | gene_id | "XLOC_084184"; | transcript_id | "Novel_001119"; | exon_number | "2"; | gene_type | " |
| At_chr6 | Cufflinks | exon | 54879863 | 54880528 | . | + | . | gene_id | "XLOC_084212"; | transcript_id | "Novel_001120"; | exon_number | "1"; | gene_type | " |
| At_chr6 | Cufflinks | exon | 54880616 | 54881856 | . | + | . | gene_id | "XLOC_084212"; | transcript_id | "Novel_001120"; | exon_number | "2"; | gene_type | " |
| At_chr6 | Cufflinks | exon | 54879901 | 54881695 | . | + | . | gene_id | "XLOC_084212"; | transcript_id | "Novel_001121"; | exon_number | "1"; | gene_type | " |

|         |           |      |          |          |   |   |   |         |                |               |                 |             |      |           |   |
|---------|-----------|------|----------|----------|---|---|---|---------|----------------|---------------|-----------------|-------------|------|-----------|---|
| At_chr6 | Cufflinks | exon | 54882007 | 54882907 | . | + | . | gene_id | "XLOC_084212"; | transcript_id | "Novel_001121"; | exon_number | "2"; | gene_type | " |
| At_chr6 | Cufflinks | exon | 54888952 | 54889266 | . | + | . | gene_id | "XLOC_084212"; | transcript_id | "Novel_001122"; | exon_number | "1"; | gene_type | " |
| At_chr6 | Cufflinks | exon | 54889423 | 54889630 | . | + | . | gene_id | "XLOC_084212"; | transcript_id | "Novel_001122"; | exon_number | "2"; | gene_type | " |
| At_chr6 | Cufflinks | exon | 54896618 | 54897129 | . | + | . | gene_id | "XLOC_084215"; | transcript_id | "Novel_001123"; | exon_number | "1"; | gene_type | " |
| At_chr6 | Cufflinks | exon | 54897228 | 54898081 | . | + | . | gene_id | "XLOC_084215"; | transcript_id | "Novel_001123"; | exon_number | "2"; | gene_type | " |
| At_chr6 | Cufflinks | exon | 1592338  | 1593664  | . | - | . | gene_id | "XLOC_084485"; | transcript_id | "Novel_001124"; | exon_number | "1"; | gene_type | " |
| At_chr6 | Cufflinks | exon | 1593757  | 1594026  | . | - | . | gene_id | "XLOC_084485"; | transcript_id | "Novel_001124"; | exon_number | "2"; | gene_type | " |
| At_chr6 | Cufflinks | exon | 1594129  | 1594403  | . | - | . | gene_id | "XLOC_084485"; | transcript_id | "Novel_001124"; | exon_number | "3"; | gene_type | " |
| At_chr6 | Cufflinks | exon | 1594951  | 1595164  | . | - | . | gene_id | "XLOC_084485"; | transcript_id | "Novel_001124"; | exon_number | "4"; | gene_type | " |
| At_chr6 | Cufflinks | exon | 2308864  | 2309542  | . | - | . | gene_id | "XLOC_084544"; | transcript_id | "Novel_001125"; | exon_number | "1"; | gene_type | " |
| At_chr6 | Cufflinks | exon | 2309738  | 2309842  | . | - | . | gene_id | "XLOC_084544"; | transcript_id | "Novel_001125"; | exon_number | "2"; | gene_type | " |
| At_chr6 | Cufflinks | exon | 2309929  | 2310179  | . | - | . | gene_id | "XLOC_084544"; | transcript_id | "Novel_001125"; | exon_number | "3"; | gene_type | " |
| At_chr6 | Cufflinks | exon | 2825566  | 2828417  | . | - | . | gene_id | "XLOC_084595"; | transcript_id | "Novel_001126"; | exon_number | "1"; | gene_type | " |
| At_chr6 | Cufflinks | exon | 2828505  | 2828854  | . | - | . | gene_id | "XLOC_084595"; | transcript_id | "Novel_001126"; | exon_number | "2"; | gene_type | " |
| At_chr6 | Cufflinks | exon | 2828981  | 2829401  | . | - | . | gene_id | "XLOC_084595"; | transcript_id | "Novel_001126"; | exon_number | "3"; | gene_type | " |
| At_chr6 | Cufflinks | exon | 2825788  | 2828417  | . | - | . | gene_id | "XLOC_084595"; | transcript_id | "Novel_001127"; | exon_number | "1"; | gene_type | " |
| At_chr6 | Cufflinks | exon | 2828505  | 2828854  | . | - | . | gene_id | "XLOC_084595"; | transcript_id | "Novel_001127"; | exon_number | "2"; | gene_type | " |
| At_chr6 | Cufflinks | exon | 2829421  | 2829472  | . | - | . | gene_id | "XLOC_084595"; | transcript_id | "Novel_001127"; | exon_number | "3"; | gene_type | " |
| At_chr6 | Cufflinks | exon | 2917598  | 2917966  | . | - | . | gene_id | "XLOC_084609"; | transcript_id | "Novel_001128"; | exon_number | "1"; | gene_type | " |
| At_chr6 | Cufflinks | exon | 2918318  | 2918426  | . | - | . | gene_id | "XLOC_084609"; | transcript_id | "Novel_001128"; | exon_number | "2"; | gene_type | " |
| At_chr6 | Cufflinks | exon | 2918512  | 2918940  | . | - | . | gene_id | "XLOC_084609"; | transcript_id | "Novel_001128"; | exon_number | "3"; | gene_type | " |
| At_chr6 | Cufflinks | exon | 3414110  | 3419687  | . | - | . | gene_id | "XLOC_084706"; | transcript_id | "Novel_001129"; | exon_number | "1"; | gene_type | " |
| At_chr6 | Cufflinks | exon | 3419846  | 3420373  | . | - | . | gene_id | "XLOC_084706"; | transcript_id | "Novel_001129"; | exon_number | "2"; | gene_type | " |
| At_chr6 | Cufflinks | exon | 3414110  | 3419687  | . | - | . | gene_id | "XLOC_084706"; | transcript_id | "Novel_001130"; | exon_number | "1"; | gene_type | " |
| At_chr6 | Cufflinks | exon | 3419846  | 3419957  | . | - | . | gene_id | "XLOC_084706"; | transcript_id | "Novel_001130"; | exon_number | "2"; | gene_type | " |
| At_chr6 | Cufflinks | exon | 3420063  | 3420159  | . | - | . | gene_id | "XLOC_084706"; | transcript_id | "Novel_001130"; | exon_number | "3"; | gene_type | " |
| At_chr6 | Cufflinks | exon | 3420277  | 3420374  | . | - | . | gene_id | "XLOC_084706"; | transcript_id | "Novel_001130"; | exon_number | "4"; | gene_type | " |
| At_chr6 | Cufflinks | exon | 11012758 | 11013100 | . | - | . | gene_id | "XLOC_085350"; | transcript_id | "Novel_001131"; | exon_number | "1"; | gene_type | " |
| At_chr6 | Cufflinks | exon | 11013211 | 11013316 | . | - | . | gene_id | "XLOC_085350"; | transcript_id | "Novel_001131"; | exon_number | "2"; | gene_type | " |
| At_chr6 | Cufflinks | exon | 11013470 | 11013744 | . | - | . | gene_id | "XLOC_085350"; | transcript_id | "Novel_001131"; | exon_number | "3"; | gene_type | " |
| At_chr6 | Cufflinks | exon | 11012758 | 11013316 | . | - | . | gene_id | "XLOC_085350"; | transcript_id | "Novel_001132"; | exon_number | "1"; | gene_type | " |
| At_chr6 | Cufflinks | exon | 11013470 | 11013744 | . | - | . | gene_id | "XLOC_085350"; | transcript_id | "Novel_001132"; | exon_number | "2"; | gene_type | " |
| At_chr6 | Cufflinks | exon | 16375695 | 16376184 | . | - | . | gene_id | "XLOC_085611"; | transcript_id | "Novel_001133"; | exon_number | "1"; | gene_type | " |
| At_chr6 | Cufflinks | exon | 16376304 | 16376589 | . | - | . | gene_id | "XLOC_085611"; | transcript_id | "Novel_001133"; | exon_number | "2"; | gene_type | " |
| At_chr6 | Cufflinks | exon | 16376108 | 16376214 | . | - | . | gene_id | "XLOC_085611"; | transcript_id | "Novel_001134"; | exon_number | "1"; | gene_type | " |

|         |           |      |          |          |   |   |   |         |                |               |                 |             |      |           |   |
|---------|-----------|------|----------|----------|---|---|---|---------|----------------|---------------|-----------------|-------------|------|-----------|---|
| At_chr6 | Cufflinks | exon | 16376304 | 16376596 | . | - | . | gene_id | "XLOC_085611"; | transcript_id | "Novel_001134"; | exon_number | "2"; | gene_type | " |
| At_chr6 | Cufflinks | exon | 17284357 | 17285195 | . | - | . | gene_id | "XLOC_085636"; | transcript_id | "Novel_001135"; | exon_number | "1"; | gene_type | " |
| At_chr6 | Cufflinks | exon | 17285285 | 17285554 | . | - | . | gene_id | "XLOC_085636"; | transcript_id | "Novel_001135"; | exon_number | "2"; | gene_type | " |
| At_chr6 | Cufflinks | exon | 17285969 | 17286662 | . | - | . | gene_id | "XLOC_085636"; | transcript_id | "Novel_001135"; | exon_number | "3"; | gene_type | " |
| At_chr6 | Cufflinks | exon | 22366828 | 22367267 | . | - | . | gene_id | "XLOC_085845"; | transcript_id | "Novel_001136"; | exon_number | "1"; | gene_type | " |
| At_chr6 | Cufflinks | exon | 22368443 | 22368832 | . | - | . | gene_id | "XLOC_085845"; | transcript_id | "Novel_001136"; | exon_number | "2"; | gene_type | " |
| At_chr6 | Cufflinks | exon | 22368969 | 22369131 | . | - | . | gene_id | "XLOC_085845"; | transcript_id | "Novel_001136"; | exon_number | "3"; | gene_type | " |
| At_chr6 | Cufflinks | exon | 26023462 | 26024005 | . | - | . | gene_id | "XLOC_085960"; | transcript_id | "Novel_001137"; | exon_number | "1"; | gene_type | " |
| At_chr6 | Cufflinks | exon | 26024101 | 26024275 | . | - | . | gene_id | "XLOC_085960"; | transcript_id | "Novel_001137"; | exon_number | "2"; | gene_type | " |
| At_chr6 | Cufflinks | exon | 26024568 | 26024664 | . | - | . | gene_id | "XLOC_085960"; | transcript_id | "Novel_001137"; | exon_number | "3"; | gene_type | " |
| At_chr6 | Cufflinks | exon | 26024945 | 26025008 | . | - | . | gene_id | "XLOC_085960"; | transcript_id | "Novel_001137"; | exon_number | "4"; | gene_type | " |
| At_chr6 | Cufflinks | exon | 26025617 | 26025783 | . | - | . | gene_id | "XLOC_085960"; | transcript_id | "Novel_001137"; | exon_number | "5"; | gene_type | " |
| At_chr6 | Cufflinks | exon | 26025976 | 26026047 | . | - | . | gene_id | "XLOC_085960"; | transcript_id | "Novel_001137"; | exon_number | "6"; | gene_type | " |
| At_chr6 | Cufflinks | exon | 26026243 | 26026316 | . | - | . | gene_id | "XLOC_085960"; | transcript_id | "Novel_001137"; | exon_number | "7"; | gene_type | " |
| At_chr6 | Cufflinks | exon | 26023614 | 26024005 | . | - | . | gene_id | "XLOC_085960"; | transcript_id | "Novel_001138"; | exon_number | "1"; | gene_type | " |
| At_chr6 | Cufflinks | exon | 26024101 | 26025783 | . | - | . | gene_id | "XLOC_085960"; | transcript_id | "Novel_001138"; | exon_number | "2"; | gene_type | " |
| At_chr6 | Cufflinks | exon | 26025976 | 26026047 | . | - | . | gene_id | "XLOC_085960"; | transcript_id | "Novel_001138"; | exon_number | "3"; | gene_type | " |
| At_chr6 | Cufflinks | exon | 26026243 | 26026354 | . | - | . | gene_id | "XLOC_085960"; | transcript_id | "Novel_001138"; | exon_number | "4"; | gene_type | " |
| At_chr6 | Cufflinks | exon | 28386300 | 28386778 | . | - | . | gene_id | "XLOC_086038"; | transcript_id | "Novel_001139"; | exon_number | "1"; | gene_type | " |
| At_chr6 | Cufflinks | exon | 28387456 | 28389579 | . | - | . | gene_id | "XLOC_086038"; | transcript_id | "Novel_001139"; | exon_number | "2"; | gene_type | " |
| At_chr6 | Cufflinks | exon | 35177522 | 35179734 | . | - | . | gene_id | "XLOC_086281"; | transcript_id | "Novel_001140"; | exon_number | "1"; | gene_type | " |
| At_chr6 | Cufflinks | exon | 35179800 | 35180109 | . | - | . | gene_id | "XLOC_086281"; | transcript_id | "Novel_001140"; | exon_number | "2"; | gene_type | " |
| At_chr6 | Cufflinks | exon | 35180293 | 35180335 | . | - | . | gene_id | "XLOC_086281"; | transcript_id | "Novel_001140"; | exon_number | "3"; | gene_type | " |
| At_chr6 | Cufflinks | exon | 35180549 | 35180651 | . | - | . | gene_id | "XLOC_086281"; | transcript_id | "Novel_001140"; | exon_number | "4"; | gene_type | " |
| At_chr6 | Cufflinks | exon | 35180766 | 35181121 | . | - | . | gene_id | "XLOC_086281"; | transcript_id | "Novel_001140"; | exon_number | "5"; | gene_type | " |
| At_chr6 | Cufflinks | exon | 35177676 | 35178430 | . | - | . | gene_id | "XLOC_086281"; | transcript_id | "Novel_001141"; | exon_number | "1"; | gene_type | " |
| At_chr6 | Cufflinks | exon | 35178885 | 35179092 | . | - | . | gene_id | "XLOC_086281"; | transcript_id | "Novel_001141"; | exon_number | "2"; | gene_type | " |
| At_chr6 | Cufflinks | exon | 35179579 | 35179699 | . | - | . | gene_id | "XLOC_086281"; | transcript_id | "Novel_001141"; | exon_number | "3"; | gene_type | " |
| At_chr6 | Cufflinks | exon | 35179800 | 35180109 | . | - | . | gene_id | "XLOC_086281"; | transcript_id | "Novel_001141"; | exon_number | "4"; | gene_type | " |
| At_chr6 | Cufflinks | exon | 35180293 | 35180335 | . | - | . | gene_id | "XLOC_086281"; | transcript_id | "Novel_001141"; | exon_number | "5"; | gene_type | " |
| At_chr6 | Cufflinks | exon | 35180549 | 35180651 | . | - | . | gene_id | "XLOC_086281"; | transcript_id | "Novel_001141"; | exon_number | "6"; | gene_type | " |
| At_chr6 | Cufflinks | exon | 35180766 | 35181138 | . | - | . | gene_id | "XLOC_086281"; | transcript_id | "Novel_001141"; | exon_number | "7"; | gene_type | " |
| At_chr6 | Cufflinks | exon | 37978963 | 37979265 | . | - | . | gene_id | "XLOC_086409"; | transcript_id | "Novel_001142"; | exon_number | "1"; | gene_type | " |
| At_chr6 | Cufflinks | exon | 37979340 | 37979603 | . | - | . | gene_id | "XLOC_086409"; | transcript_id | "Novel_001142"; | exon_number | "2"; | gene_type | " |
| At_chr6 | Cufflinks | exon | 37978964 | 37979252 | . | - | . | gene_id | "XLOC_086409"; | transcript_id | "Novel_001143"; | exon_number | "1"; | gene_type | " |

|         |           |      |          |          |   |   |   |         |                |               |                 |             |      |           |   |
|---------|-----------|------|----------|----------|---|---|---|---------|----------------|---------------|-----------------|-------------|------|-----------|---|
| At_chr6 | Cufflinks | exon | 37979340 | 37979465 | . | - | . | gene_id | "XLOC_086409"; | transcript_id | "Novel_001143"; | exon_number | "2"; | gene_type | " |
| At_chr6 | Cufflinks | exon | 38003756 | 38004321 | . | - | . | gene_id | "XLOC_086409"; | transcript_id | "Novel_001144"; | exon_number | "1"; | gene_type | " |
| At_chr6 | Cufflinks | exon | 38004396 | 38004521 | . | - | . | gene_id | "XLOC_086409"; | transcript_id | "Novel_001144"; | exon_number | "2"; | gene_type | " |
| At_chr6 | Cufflinks | exon | 38004612 | 38004706 | . | - | . | gene_id | "XLOC_086409"; | transcript_id | "Novel_001144"; | exon_number | "3"; | gene_type | " |
| At_chr6 | Cufflinks | exon | 38005252 | 38005337 | . | - | . | gene_id | "XLOC_086409"; | transcript_id | "Novel_001144"; | exon_number | "4"; | gene_type | " |
| At_chr6 | Cufflinks | exon | 38005414 | 38005563 | . | - | . | gene_id | "XLOC_086409"; | transcript_id | "Novel_001144"; | exon_number | "5"; | gene_type | " |
| At_chr6 | Cufflinks | exon | 38005643 | 38005741 | . | - | . | gene_id | "XLOC_086409"; | transcript_id | "Novel_001144"; | exon_number | "6"; | gene_type | " |
| At_chr6 | Cufflinks | exon | 38003756 | 38004521 | . | - | . | gene_id | "XLOC_086409"; | transcript_id | "Novel_001145"; | exon_number | "1"; | gene_type | " |
| At_chr6 | Cufflinks | exon | 38004612 | 38004706 | . | - | . | gene_id | "XLOC_086409"; | transcript_id | "Novel_001145"; | exon_number | "2"; | gene_type | " |
| At_chr6 | Cufflinks | exon | 38005252 | 38005337 | . | - | . | gene_id | "XLOC_086409"; | transcript_id | "Novel_001145"; | exon_number | "3"; | gene_type | " |
| At_chr6 | Cufflinks | exon | 38005414 | 38005563 | . | - | . | gene_id | "XLOC_086409"; | transcript_id | "Novel_001145"; | exon_number | "4"; | gene_type | " |
| At_chr6 | Cufflinks | exon | 38005643 | 38005741 | . | - | . | gene_id | "XLOC_086409"; | transcript_id | "Novel_001145"; | exon_number | "5"; | gene_type | " |
| At_chr6 | Cufflinks | exon | 38003931 | 38004321 | . | - | . | gene_id | "XLOC_086409"; | transcript_id | "Novel_001146"; | exon_number | "1"; | gene_type | " |
| At_chr6 | Cufflinks | exon | 38004396 | 38004521 | . | - | . | gene_id | "XLOC_086409"; | transcript_id | "Novel_001146"; | exon_number | "2"; | gene_type | " |
| At_chr6 | Cufflinks | exon | 38004612 | 38004706 | . | - | . | gene_id | "XLOC_086409"; | transcript_id | "Novel_001146"; | exon_number | "3"; | gene_type | " |
| At_chr6 | Cufflinks | exon | 38005252 | 38005337 | . | - | . | gene_id | "XLOC_086409"; | transcript_id | "Novel_001146"; | exon_number | "4"; | gene_type | " |
| At_chr6 | Cufflinks | exon | 38005414 | 38005563 | . | - | . | gene_id | "XLOC_086409"; | transcript_id | "Novel_001146"; | exon_number | "5"; | gene_type | " |
| At_chr6 | Cufflinks | exon | 38005680 | 38005738 | . | - | . | gene_id | "XLOC_086409"; | transcript_id | "Novel_001146"; | exon_number | "6"; | gene_type | " |
| At_chr6 | Cufflinks | exon | 37981056 | 37981096 | . | - | . | gene_id | "XLOC_086412"; | transcript_id | "Novel_001147"; | exon_number | "1"; | gene_type | " |
| At_chr6 | Cufflinks | exon | 37981172 | 37981324 | . | - | . | gene_id | "XLOC_086412"; | transcript_id | "Novel_001147"; | exon_number | "2"; | gene_type | " |
| At_chr6 | Cufflinks | exon | 37981422 | 37981528 | . | - | . | gene_id | "XLOC_086412"; | transcript_id | "Novel_001147"; | exon_number | "3"; | gene_type | " |
| At_chr6 | Cufflinks | exon | 38519606 | 38524470 | . | - | . | gene_id | "XLOC_086450"; | transcript_id | "Novel_001148"; | exon_number | "1"; | gene_type | " |
| At_chr6 | Cufflinks | exon | 38524948 | 38525074 | . | - | . | gene_id | "XLOC_086450"; | transcript_id | "Novel_001148"; | exon_number | "2"; | gene_type | " |
| At_chr6 | Cufflinks | exon | 38519702 | 38523609 | . | - | . | gene_id | "XLOC_086450"; | transcript_id | "Novel_001149"; | exon_number | "1"; | gene_type | " |
| At_chr6 | Cufflinks | exon | 38524416 | 38525136 | . | - | . | gene_id | "XLOC_086450"; | transcript_id | "Novel_001149"; | exon_number | "2"; | gene_type | " |
| At_chr6 | Cufflinks | exon | 38637930 | 38638566 | . | - | . | gene_id | "XLOC_086459"; | transcript_id | "Novel_001150"; | exon_number | "1"; | gene_type | " |
| At_chr6 | Cufflinks | exon | 38638834 | 38638951 | . | - | . | gene_id | "XLOC_086459"; | transcript_id | "Novel_001150"; | exon_number | "2"; | gene_type | " |
| At_chr6 | Cufflinks | exon | 39287981 | 39288026 | . | - | . | gene_id | "XLOC_086519"; | transcript_id | "Novel_001151"; | exon_number | "1"; | gene_type | " |
| At_chr6 | Cufflinks | exon | 39289815 | 39289877 | . | - | . | gene_id | "XLOC_086519"; | transcript_id | "Novel_001151"; | exon_number | "2"; | gene_type | " |
| At_chr6 | Cufflinks | exon | 39294092 | 39294139 | . | - | . | gene_id | "XLOC_086519"; | transcript_id | "Novel_001151"; | exon_number | "3"; | gene_type | " |
| At_chr6 | Cufflinks | exon | 39294202 | 39294264 | . | - | . | gene_id | "XLOC_086519"; | transcript_id | "Novel_001151"; | exon_number | "4"; | gene_type | " |
| At_chr6 | Cufflinks | exon | 39296007 | 39296050 | . | - | . | gene_id | "XLOC_086519"; | transcript_id | "Novel_001151"; | exon_number | "5"; | gene_type | " |
| At_chr6 | Cufflinks | exon | 39296145 | 39296306 | . | - | . | gene_id | "XLOC_086519"; | transcript_id | "Novel_001151"; | exon_number | "6"; | gene_type | " |
| At_chr6 | Cufflinks | exon | 42851012 | 42852305 | . | - | . | gene_id | "XLOC_086762"; | transcript_id | "Novel_001152"; | exon_number | "1"; | gene_type | " |
| At_chr6 | Cufflinks | exon | 42853533 | 42853740 | . | - | . | gene_id | "XLOC_086762"; | transcript_id | "Novel_001152"; | exon_number | "2"; | gene_type | " |





|         |           |      |          |          |   |   |   |         |                |               |                 |             |      |           |   |
|---------|-----------|------|----------|----------|---|---|---|---------|----------------|---------------|-----------------|-------------|------|-----------|---|
| At_chr6 | Cufflinks | exon | 43473636 | 43475532 | . | - | . | gene_id | "XLOC_086835"; | transcript_id | "Novel_001160"; | exon_number | "5"; | gene_type | " |
| At_chr6 | Cufflinks | exon | 43575752 | 43576139 | . | - | . | gene_id | "XLOC_086841"; | transcript_id | "Novel_001161"; | exon_number | "1"; | gene_type | " |
| At_chr6 | Cufflinks | exon | 43576242 | 43576517 | . | - | . | gene_id | "XLOC_086841"; | transcript_id | "Novel_001161"; | exon_number | "2"; | gene_type | " |
| At_chr6 | Cufflinks | exon | 43576597 | 43576613 | . | - | . | gene_id | "XLOC_086841"; | transcript_id | "Novel_001161"; | exon_number | "3"; | gene_type | " |
| At_chr6 | Cufflinks | exon | 43663736 | 43663799 | . | - | . | gene_id | "XLOC_086841"; | transcript_id | "Novel_001161"; | exon_number | "4"; | gene_type | " |
| At_chr6 | Cufflinks | exon | 43663910 | 43664041 | . | - | . | gene_id | "XLOC_086841"; | transcript_id | "Novel_001161"; | exon_number | "5"; | gene_type | " |
| At_chr6 | Cufflinks | exon | 43575752 | 43576139 | . | - | . | gene_id | "XLOC_086841"; | transcript_id | "Novel_001162"; | exon_number | "1"; | gene_type | " |
| At_chr6 | Cufflinks | exon | 43576242 | 43576517 | . | - | . | gene_id | "XLOC_086841"; | transcript_id | "Novel_001162"; | exon_number | "2"; | gene_type | " |
| At_chr6 | Cufflinks | exon | 43663719 | 43663799 | . | - | . | gene_id | "XLOC_086841"; | transcript_id | "Novel_001162"; | exon_number | "3"; | gene_type | " |
| At_chr6 | Cufflinks | exon | 43663910 | 43664041 | . | - | . | gene_id | "XLOC_086841"; | transcript_id | "Novel_001162"; | exon_number | "4"; | gene_type | " |
| At_chr6 | Cufflinks | exon | 43576620 | 43576921 | . | - | . | gene_id | "XLOC_086842"; | transcript_id | "Novel_001163"; | exon_number | "1"; | gene_type | " |
| At_chr6 | Cufflinks | exon | 43577019 | 43577240 | . | - | . | gene_id | "XLOC_086842"; | transcript_id | "Novel_001163"; | exon_number | "2"; | gene_type | " |
| At_chr6 | Cufflinks | exon | 43577332 | 43577412 | . | - | . | gene_id | "XLOC_086842"; | transcript_id | "Novel_001163"; | exon_number | "3"; | gene_type | " |
| At_chr6 | Cufflinks | exon | 43577497 | 43577658 | . | - | . | gene_id | "XLOC_086842"; | transcript_id | "Novel_001163"; | exon_number | "4"; | gene_type | " |
| At_chr6 | Cufflinks | exon | 43577769 | 43577915 | . | - | . | gene_id | "XLOC_086842"; | transcript_id | "Novel_001163"; | exon_number | "5"; | gene_type | " |
| At_chr6 | Cufflinks | exon | 43578508 | 43578644 | . | - | . | gene_id | "XLOC_086842"; | transcript_id | "Novel_001164"; | exon_number | "1"; | gene_type | " |
| At_chr6 | Cufflinks | exon | 43666740 | 43667070 | . | - | . | gene_id | "XLOC_086842"; | transcript_id | "Novel_001164"; | exon_number | "2"; | gene_type | " |
| At_chr6 | Cufflinks | exon | 43662666 | 43663261 | . | - | . | gene_id | "XLOC_086844"; | transcript_id | "Novel_001165"; | exon_number | "1"; | gene_type | " |
| At_chr6 | Cufflinks | exon | 43663363 | 43663470 | . | - | . | gene_id | "XLOC_086844"; | transcript_id | "Novel_001165"; | exon_number | "2"; | gene_type | " |
| At_chr6 | Cufflinks | exon | 43663553 | 43663613 | . | - | . | gene_id | "XLOC_086844"; | transcript_id | "Novel_001165"; | exon_number | "3"; | gene_type | " |
| At_chr6 | Cufflinks | exon | 43662704 | 43663261 | . | - | . | gene_id | "XLOC_086844"; | transcript_id | "Novel_001166"; | exon_number | "1"; | gene_type | " |
| At_chr6 | Cufflinks | exon | 43663363 | 43663610 | . | - | . | gene_id | "XLOC_086844"; | transcript_id | "Novel_001166"; | exon_number | "2"; | gene_type | " |
| At_chr6 | Cufflinks | exon | 43807019 | 43807141 | . | - | . | gene_id | "XLOC_086859"; | transcript_id | "Novel_001167"; | exon_number | "1"; | gene_type | " |
| At_chr6 | Cufflinks | exon | 43807771 | 43807937 | . | - | . | gene_id | "XLOC_086859"; | transcript_id | "Novel_001167"; | exon_number | "2"; | gene_type | " |
| At_chr6 | Cufflinks | exon | 43808203 | 43808255 | . | - | . | gene_id | "XLOC_086859"; | transcript_id | "Novel_001167"; | exon_number | "3"; | gene_type | " |
| At_chr6 | Cufflinks | exon | 43808337 | 43808385 | . | - | . | gene_id | "XLOC_086859"; | transcript_id | "Novel_001167"; | exon_number | "4"; | gene_type | " |
| At_chr6 | Cufflinks | exon | 43808708 | 43808788 | . | - | . | gene_id | "XLOC_086860"; | transcript_id | "Novel_001168"; | exon_number | "1"; | gene_type | " |
| At_chr6 | Cufflinks | exon | 43809133 | 43809244 | . | - | . | gene_id | "XLOC_086860"; | transcript_id | "Novel_001168"; | exon_number | "2"; | gene_type | " |
| At_chr6 | Cufflinks | exon | 43809338 | 43809616 | . | - | . | gene_id | "XLOC_086860"; | transcript_id | "Novel_001168"; | exon_number | "3"; | gene_type | " |
| At_chr6 | Cufflinks | exon | 43901806 | 43902269 | . | - | . | gene_id | "XLOC_086867"; | transcript_id | "Novel_001169"; | exon_number | "1"; | gene_type | " |
| At_chr6 | Cufflinks | exon | 43905542 | 43905630 | . | - | . | gene_id | "XLOC_086867"; | transcript_id | "Novel_001169"; | exon_number | "2"; | gene_type | " |
| At_chr6 | Cufflinks | exon | 43906945 | 43907010 | . | - | . | gene_id | "XLOC_086867"; | transcript_id | "Novel_001169"; | exon_number | "3"; | gene_type | " |
| At_chr6 | Cufflinks | exon | 43907100 | 43907292 | . | - | . | gene_id | "XLOC_086867"; | transcript_id | "Novel_001169"; | exon_number | "4"; | gene_type | " |
| At_chr6 | Cufflinks | exon | 44489957 | 44495084 | . | - | . | gene_id | "XLOC_086919"; | transcript_id | "Novel_001170"; | exon_number | "1"; | gene_type | " |
| At_chr6 | Cufflinks | exon | 44495182 | 44495552 | . | - | . | gene_id | "XLOC_086919"; | transcript_id | "Novel_001170"; | exon_number | "2"; | gene_type | " |

|         |           |      |          |          |   |   |         |                |               |                 |             |      |           |   |
|---------|-----------|------|----------|----------|---|---|---------|----------------|---------------|-----------------|-------------|------|-----------|---|
| At_chr6 | Cufflinks | exon | 44495626 | 44495743 | . | . | gene_id | "XLOC_086919"; | transcript_id | "Novel_001170"; | exon_number | "3"; | gene_type | " |
| At_chr6 | Cufflinks | exon | 44495847 | 44496050 | . | . | gene_id | "XLOC_086919"; | transcript_id | "Novel_001170"; | exon_number | "4"; | gene_type | " |
| At_chr6 | Cufflinks | exon | 44496240 | 44496488 | . | . | gene_id | "XLOC_086919"; | transcript_id | "Novel_001170"; | exon_number | "5"; | gene_type | " |
| At_chr6 | Cufflinks | exon | 44636342 | 44636545 | . | . | gene_id | "XLOC_086927"; | transcript_id | "Novel_001171"; | exon_number | "1"; | gene_type | " |
| At_chr6 | Cufflinks | exon | 44995004 | 44995612 | . | . | gene_id | "XLOC_086970"; | transcript_id | "Novel_001172"; | exon_number | "1"; | gene_type | " |
| At_chr6 | Cufflinks | exon | 44996031 | 44996124 | . | . | gene_id | "XLOC_086970"; | transcript_id | "Novel_001172"; | exon_number | "2"; | gene_type | " |
| At_chr6 | Cufflinks | exon | 44996644 | 44997522 | . | . | gene_id | "XLOC_086970"; | transcript_id | "Novel_001172"; | exon_number | "3"; | gene_type | " |
| At_chr6 | Cufflinks | exon | 44997602 | 44997752 | . | . | gene_id | "XLOC_086970"; | transcript_id | "Novel_001172"; | exon_number | "4"; | gene_type | " |
| At_chr6 | Cufflinks | exon | 44996544 | 44996716 | . | . | gene_id | "XLOC_086970"; | transcript_id | "Novel_001173"; | exon_number | "1"; | gene_type | " |
| At_chr6 | Cufflinks | exon | 44997305 | 44997522 | . | . | gene_id | "XLOC_086970"; | transcript_id | "Novel_001173"; | exon_number | "2"; | gene_type | " |
| At_chr6 | Cufflinks | exon | 44997602 | 44997753 | . | . | gene_id | "XLOC_086970"; | transcript_id | "Novel_001173"; | exon_number | "3"; | gene_type | " |
| At_chr6 | Cufflinks | exon | 45162325 | 45164627 | . | . | gene_id | "XLOC_086980"; | transcript_id | "Novel_001174"; | exon_number | "1"; | gene_type | " |
| At_chr6 | Cufflinks | exon | 45165306 | 45165455 | . | . | gene_id | "XLOC_086980"; | transcript_id | "Novel_001174"; | exon_number | "2"; | gene_type | " |
| At_chr6 | Cufflinks | exon | 47544694 | 47545921 | . | . | gene_id | "XLOC_087249"; | transcript_id | "Novel_001175"; | exon_number | "1"; | gene_type | " |
| At_chr6 | Cufflinks | exon | 47547299 | 47547405 | . | . | gene_id | "XLOC_087249"; | transcript_id | "Novel_001175"; | exon_number | "2"; | gene_type | " |
| At_chr6 | Cufflinks | exon | 47547487 | 47547647 | . | . | gene_id | "XLOC_087249"; | transcript_id | "Novel_001175"; | exon_number | "3"; | gene_type | " |
| At_chr6 | Cufflinks | exon | 47835488 | 47835803 | . | . | gene_id | "XLOC_087282"; | transcript_id | "Novel_001176"; | exon_number | "1"; | gene_type | " |
| At_chr6 | Cufflinks | exon | 47836224 | 47837601 | . | . | gene_id | "XLOC_087282"; | transcript_id | "Novel_001176"; | exon_number | "2"; | gene_type | " |
| At_chr6 | Cufflinks | exon | 47837823 | 47838234 | . | . | gene_id | "XLOC_087282"; | transcript_id | "Novel_001176"; | exon_number | "3"; | gene_type | " |
| At_chr6 | Cufflinks | exon | 47838490 | 47838638 | . | . | gene_id | "XLOC_087282"; | transcript_id | "Novel_001176"; | exon_number | "4"; | gene_type | " |
| At_chr6 | Cufflinks | exon | 47838738 | 47838768 | . | . | gene_id | "XLOC_087282"; | transcript_id | "Novel_001176"; | exon_number | "5"; | gene_type | " |
| At_chr6 | Cufflinks | exon | 47838894 | 47838975 | . | . | gene_id | "XLOC_087282"; | transcript_id | "Novel_001176"; | exon_number | "6"; | gene_type | " |
| At_chr6 | Cufflinks | exon | 48145230 | 48145235 | . | . | gene_id | "XLOC_087321"; | transcript_id | "Novel_001177"; | exon_number | "1"; | gene_type | " |
| At_chr6 | Cufflinks | exon | 48145336 | 48145406 | . | . | gene_id | "XLOC_087321"; | transcript_id | "Novel_001177"; | exon_number | "2"; | gene_type | " |
| At_chr6 | Cufflinks | exon | 48146291 | 48146553 | . | . | gene_id | "XLOC_087321"; | transcript_id | "Novel_001177"; | exon_number | "3"; | gene_type | " |
| At_chr6 | Cufflinks | exon | 48253903 | 48255031 | . | . | gene_id | "XLOC_087361"; | transcript_id | "Novel_001178"; | exon_number | "1"; | gene_type | " |
| At_chr6 | Cufflinks | exon | 48255394 | 48255985 | . | . | gene_id | "XLOC_087361"; | transcript_id | "Novel_001178"; | exon_number | "2"; | gene_type | " |
| At_chr6 | Cufflinks | exon | 48253903 | 48255031 | . | . | gene_id | "XLOC_087361"; | transcript_id | "Novel_001179"; | exon_number | "1"; | gene_type | " |
| At_chr6 | Cufflinks | exon | 48255174 | 48255239 | . | . | gene_id | "XLOC_087361"; | transcript_id | "Novel_001179"; | exon_number | "2"; | gene_type | " |
| At_chr6 | Cufflinks | exon | 48255394 | 48255985 | . | . | gene_id | "XLOC_087361"; | transcript_id | "Novel_001179"; | exon_number | "3"; | gene_type | " |
| At_chr6 | Cufflinks | exon | 48505606 | 48505702 | . | . | gene_id | "XLOC_087391"; | transcript_id | "Novel_001180"; | exon_number | "1"; | gene_type | " |
| At_chr6 | Cufflinks | exon | 48507001 | 48507161 | . | . | gene_id | "XLOC_087391"; | transcript_id | "Novel_001180"; | exon_number | "2"; | gene_type | " |
| At_chr6 | Cufflinks | exon | 48508554 | 48508732 | . | . | gene_id | "XLOC_087391"; | transcript_id | "Novel_001180"; | exon_number | "3"; | gene_type | " |
| At_chr6 | Cufflinks | exon | 48506176 | 48507161 | . | . | gene_id | "XLOC_087391"; | transcript_id | "Novel_001181"; | exon_number | "1"; | gene_type | " |
| At_chr6 | Cufflinks | exon | 48508554 | 48508841 | . | . | gene_id | "XLOC_087391"; | transcript_id | "Novel_001181"; | exon_number | "2"; | gene_type | " |

|         |           |      |          |          |   |   |         |                |               |                 |             |      |           |   |
|---------|-----------|------|----------|----------|---|---|---------|----------------|---------------|-----------------|-------------|------|-----------|---|
| At_chr6 | Cufflinks | exon | 48604831 | 48605186 | . | . | gene_id | "XLOC_087415"; | transcript_id | "Novel_001182"; | exon_number | "1"; | gene_type | " |
| At_chr6 | Cufflinks | exon | 48605317 | 48605457 | . | . | gene_id | "XLOC_087415"; | transcript_id | "Novel_001182"; | exon_number | "2"; | gene_type | " |
| At_chr6 | Cufflinks | exon | 48606392 | 48606457 | . | . | gene_id | "XLOC_087415"; | transcript_id | "Novel_001182"; | exon_number | "3"; | gene_type | " |
| At_chr6 | Cufflinks | exon | 48608999 | 48609218 | . | . | gene_id | "XLOC_087415"; | transcript_id | "Novel_001183"; | exon_number | "1"; | gene_type | " |
| At_chr6 | Cufflinks | exon | 48609326 | 48609529 | . | . | gene_id | "XLOC_087415"; | transcript_id | "Novel_001183"; | exon_number | "2"; | gene_type | " |
| At_chr6 | Cufflinks | exon | 48811448 | 48814185 | . | . | gene_id | "XLOC_087432"; | transcript_id | "Novel_001184"; | exon_number | "1"; | gene_type | " |
| At_chr6 | Cufflinks | exon | 48814278 | 48814769 | . | . | gene_id | "XLOC_087432"; | transcript_id | "Novel_001184"; | exon_number | "2"; | gene_type | " |
| At_chr6 | Cufflinks | exon | 49728333 | 49729197 | . | . | gene_id | "XLOC_087552"; | transcript_id | "Novel_001185"; | exon_number | "1"; | gene_type | " |
| At_chr6 | Cufflinks | exon | 49729655 | 49729736 | . | . | gene_id | "XLOC_087552"; | transcript_id | "Novel_001185"; | exon_number | "2"; | gene_type | " |
| At_chr6 | Cufflinks | exon | 49729809 | 49729856 | . | . | gene_id | "XLOC_087552"; | transcript_id | "Novel_001185"; | exon_number | "3"; | gene_type | " |
| At_chr6 | Cufflinks | exon | 49730147 | 49730289 | . | . | gene_id | "XLOC_087552"; | transcript_id | "Novel_001185"; | exon_number | "4"; | gene_type | " |
| At_chr6 | Cufflinks | exon | 49730489 | 49731462 | . | . | gene_id | "XLOC_087552"; | transcript_id | "Novel_001185"; | exon_number | "5"; | gene_type | " |
| At_chr6 | Cufflinks | exon | 49731585 | 49731627 | . | . | gene_id | "XLOC_087552"; | transcript_id | "Novel_001185"; | exon_number | "6"; | gene_type | " |
| At_chr6 | Cufflinks | exon | 49731961 | 49732069 | . | . | gene_id | "XLOC_087552"; | transcript_id | "Novel_001185"; | exon_number | "7"; | gene_type | " |
| At_chr6 | Cufflinks | exon | 49732146 | 49732289 | . | . | gene_id | "XLOC_087552"; | transcript_id | "Novel_001185"; | exon_number | "8"; | gene_type | " |
| At_chr6 | Cufflinks | exon | 49728334 | 49729197 | . | . | gene_id | "XLOC_087552"; | transcript_id | "Novel_001186"; | exon_number | "1"; | gene_type | " |
| At_chr6 | Cufflinks | exon | 49729655 | 49729736 | . | . | gene_id | "XLOC_087552"; | transcript_id | "Novel_001186"; | exon_number | "2"; | gene_type | " |
| At_chr6 | Cufflinks | exon | 49729809 | 49729856 | . | . | gene_id | "XLOC_087552"; | transcript_id | "Novel_001186"; | exon_number | "3"; | gene_type | " |
| At_chr6 | Cufflinks | exon | 49730147 | 49730289 | . | . | gene_id | "XLOC_087552"; | transcript_id | "Novel_001186"; | exon_number | "4"; | gene_type | " |
| At_chr6 | Cufflinks | exon | 49730489 | 49730577 | . | . | gene_id | "XLOC_087552"; | transcript_id | "Novel_001186"; | exon_number | "5"; | gene_type | " |
| At_chr6 | Cufflinks | exon | 49731397 | 49731462 | . | . | gene_id | "XLOC_087552"; | transcript_id | "Novel_001186"; | exon_number | "6"; | gene_type | " |
| At_chr6 | Cufflinks | exon | 49731585 | 49731627 | . | . | gene_id | "XLOC_087552"; | transcript_id | "Novel_001186"; | exon_number | "7"; | gene_type | " |
| At_chr6 | Cufflinks | exon | 49731961 | 49732069 | . | . | gene_id | "XLOC_087552"; | transcript_id | "Novel_001186"; | exon_number | "8"; | gene_type | " |
| At_chr6 | Cufflinks | exon | 49732146 | 49732307 | . | . | gene_id | "XLOC_087552"; | transcript_id | "Novel_001186"; | exon_number | "9"; | gene_type | " |
| At_chr6 | Cufflinks | exon | 49730012 | 49730289 | . | . | gene_id | "XLOC_087552"; | transcript_id | "Novel_001187"; | exon_number | "1"; | gene_type | " |
| At_chr6 | Cufflinks | exon | 49730489 | 49730577 | . | . | gene_id | "XLOC_087552"; | transcript_id | "Novel_001187"; | exon_number | "2"; | gene_type | " |
| At_chr6 | Cufflinks | exon | 49731103 | 49731462 | . | . | gene_id | "XLOC_087552"; | transcript_id | "Novel_001187"; | exon_number | "3"; | gene_type | " |
| At_chr6 | Cufflinks | exon | 49731585 | 49731627 | . | . | gene_id | "XLOC_087552"; | transcript_id | "Novel_001187"; | exon_number | "4"; | gene_type | " |
| At_chr6 | Cufflinks | exon | 49731961 | 49732069 | . | . | gene_id | "XLOC_087552"; | transcript_id | "Novel_001187"; | exon_number | "5"; | gene_type | " |
| At_chr6 | Cufflinks | exon | 49732146 | 49732318 | . | . | gene_id | "XLOC_087552"; | transcript_id | "Novel_001187"; | exon_number | "6"; | gene_type | " |
| At_chr6 | Cufflinks | exon | 52229535 | 52229736 | . | . | gene_id | "XLOC_087838"; | transcript_id | "Novel_001188"; | exon_number | "1"; | gene_type | " |
| At_chr6 | Cufflinks | exon | 52405909 | 52406627 | . | . | gene_id | "XLOC_087858"; | transcript_id | "Novel_001189"; | exon_number | "1"; | gene_type | " |
| At_chr6 | Cufflinks | exon | 52406704 | 52407070 | . | . | gene_id | "XLOC_087858"; | transcript_id | "Novel_001189"; | exon_number | "2"; | gene_type | " |
| At_chr6 | Cufflinks | exon | 52407805 | 52408091 | . | . | gene_id | "XLOC_087858"; | transcript_id | "Novel_001189"; | exon_number | "3"; | gene_type | " |
| At_chr6 | Cufflinks | exon | 53497909 | 53498257 | . | . | gene_id | "XLOC_087975"; | transcript_id | "Novel_001190"; | exon_number | "1"; | gene_type | " |

|         |           |      |          |          |   |   |   |         |                |               |                 |             |      |           |   |
|---------|-----------|------|----------|----------|---|---|---|---------|----------------|---------------|-----------------|-------------|------|-----------|---|
| At_chr6 | Cufflinks | exon | 53510903 | 53511028 | . | - | . | gene_id | "XLOC_087975"; | transcript_id | "Novel_001190"; | exon_number | "2"; | gene_type | " |
| At_chr6 | Cufflinks | exon | 54355473 | 54355810 | . | - | . | gene_id | "XLOC_088094"; | transcript_id | "Novel_001191"; | exon_number | "1"; | gene_type | " |
| At_chr6 | Cufflinks | exon | 54356648 | 54356712 | . | - | . | gene_id | "XLOC_088094"; | transcript_id | "Novel_001191"; | exon_number | "2"; | gene_type | " |
| At_chr6 | Cufflinks | exon | 54439485 | 54440018 | . | - | . | gene_id | "XLOC_088114"; | transcript_id | "Novel_001192"; | exon_number | "1"; | gene_type | " |
| At_chr6 | Cufflinks | exon | 54440109 | 54440382 | . | - | . | gene_id | "XLOC_088114"; | transcript_id | "Novel_001192"; | exon_number | "2"; | gene_type | " |
| At_chr6 | Cufflinks | exon | 54544674 | 54544878 | . | - | . | gene_id | "XLOC_088133"; | transcript_id | "Novel_001193"; | exon_number | "1"; | gene_type | " |
| At_chr6 | Cufflinks | exon | 54545005 | 54545074 | . | - | . | gene_id | "XLOC_088133"; | transcript_id | "Novel_001193"; | exon_number | "2"; | gene_type | " |
| At_chr6 | Cufflinks | exon | 55290219 | 55291919 | . | - | . | gene_id | "XLOC_088208"; | transcript_id | "Novel_001194"; | exon_number | "1"; | gene_type | " |
| At_chr6 | Cufflinks | exon | 55292437 | 55292584 | . | - | . | gene_id | "XLOC_088208"; | transcript_id | "Novel_001194"; | exon_number | "2"; | gene_type | " |
| At_chr6 | Cufflinks | exon | 55290478 | 55291334 | . | - | . | gene_id | "XLOC_088208"; | transcript_id | "Novel_001195"; | exon_number | "1"; | gene_type | " |
| At_chr6 | Cufflinks | exon | 55291460 | 55291919 | . | - | . | gene_id | "XLOC_088208"; | transcript_id | "Novel_001195"; | exon_number | "2"; | gene_type | " |
| At_chr6 | Cufflinks | exon | 55292437 | 55292561 | . | - | . | gene_id | "XLOC_088208"; | transcript_id | "Novel_001195"; | exon_number | "3"; | gene_type | " |
| At_chr6 | Cufflinks | exon | 55343952 | 55344518 | . | - | . | gene_id | "XLOC_088217"; | transcript_id | "Novel_001196"; | exon_number | "1"; | gene_type | " |
| At_chr6 | Cufflinks | exon | 55344600 | 55345907 | . | - | . | gene_id | "XLOC_088217"; | transcript_id | "Novel_001196"; | exon_number | "2"; | gene_type | " |
| At_chr6 | Cufflinks | exon | 55343960 | 55344518 | . | - | . | gene_id | "XLOC_088217"; | transcript_id | "Novel_001197"; | exon_number | "1"; | gene_type | " |
| At_chr6 | Cufflinks | exon | 55344600 | 55344954 | . | - | . | gene_id | "XLOC_088217"; | transcript_id | "Novel_001197"; | exon_number | "2"; | gene_type | " |
| At_chr6 | Cufflinks | exon | 55345390 | 55345921 | . | - | . | gene_id | "XLOC_088217"; | transcript_id | "Novel_001197"; | exon_number | "3"; | gene_type | " |
| At_chr6 | Cufflinks | exon | 55771170 | 55771233 | . | - | . | gene_id | "XLOC_088280"; | transcript_id | "Novel_001198"; | exon_number | "1"; | gene_type | " |
| At_chr6 | Cufflinks | exon | 55771321 | 55771612 | . | - | . | gene_id | "XLOC_088280"; | transcript_id | "Novel_001198"; | exon_number | "2"; | gene_type | " |
| At_chr7 | Cufflinks | exon | 1830891  | 1831148  | . | + | . | gene_id | "XLOC_088677"; | transcript_id | "Novel_001199"; | exon_number | "1"; | gene_type | " |
| At_chr7 | Cufflinks | exon | 1831242  | 1831292  | . | + | . | gene_id | "XLOC_088677"; | transcript_id | "Novel_001199"; | exon_number | "2"; | gene_type | " |
| At_chr7 | Cufflinks | exon | 1831869  | 1832473  | . | + | . | gene_id | "XLOC_088677"; | transcript_id | "Novel_001199"; | exon_number | "3"; | gene_type | " |
| At_chr7 | Cufflinks | exon | 1894891  | 1895667  | . | + | . | gene_id | "XLOC_088680"; | transcript_id | "Novel_001200"; | exon_number | "1"; | gene_type | " |
| At_chr7 | Cufflinks | exon | 1895944  | 1896004  | . | + | . | gene_id | "XLOC_088680"; | transcript_id | "Novel_001200"; | exon_number | "2"; | gene_type | " |
| At_chr7 | Cufflinks | exon | 1896117  | 1896215  | . | + | . | gene_id | "XLOC_088680"; | transcript_id | "Novel_001200"; | exon_number | "3"; | gene_type | " |
| At_chr7 | Cufflinks | exon | 1896672  | 1896773  | . | + | . | gene_id | "XLOC_088680"; | transcript_id | "Novel_001200"; | exon_number | "4"; | gene_type | " |
| At_chr7 | Cufflinks | exon | 1896863  | 1896904  | . | + | . | gene_id | "XLOC_088680"; | transcript_id | "Novel_001200"; | exon_number | "5"; | gene_type | " |
| At_chr7 | Cufflinks | exon | 1897356  | 1897462  | . | + | . | gene_id | "XLOC_088680"; | transcript_id | "Novel_001200"; | exon_number | "6"; | gene_type | " |
| At_chr7 | Cufflinks | exon | 1897707  | 1898193  | . | + | . | gene_id | "XLOC_088680"; | transcript_id | "Novel_001200"; | exon_number | "7"; | gene_type | " |
| At_chr7 | Cufflinks | exon | 1896939  | 1897462  | . | + | . | gene_id | "XLOC_088680"; | transcript_id | "Novel_001201"; | exon_number | "1"; | gene_type | " |
| At_chr7 | Cufflinks | exon | 1897707  | 1898047  | . | + | . | gene_id | "XLOC_088680"; | transcript_id | "Novel_001201"; | exon_number | "2"; | gene_type | " |
| At_chr7 | Cufflinks | exon | 2178119  | 2178458  | . | + | . | gene_id | "XLOC_088719"; | transcript_id | "Novel_001202"; | exon_number | "1"; | gene_type | " |
| At_chr7 | Cufflinks | exon | 2178741  | 2178888  | . | + | . | gene_id | "XLOC_088719"; | transcript_id | "Novel_001202"; | exon_number | "2"; | gene_type | " |
| At_chr7 | Cufflinks | exon | 2179655  | 2179722  | . | + | . | gene_id | "XLOC_088719"; | transcript_id | "Novel_001202"; | exon_number | "3"; | gene_type | " |
| At_chr7 | Cufflinks | exon | 2532879  | 2533016  | . | + | . | gene_id | "XLOC_088768"; | transcript_id | "Novel_001203"; | exon_number | "1"; | gene_type | " |



|         |           |      |         |         |   |   |   |         |                |               |                 |             |      |           |   |
|---------|-----------|------|---------|---------|---|---|---|---------|----------------|---------------|-----------------|-------------|------|-----------|---|
| At_chr7 | Cufflinks | exon | 4398810 | 4398962 | . | + | . | gene_id | "XLOC_089022"; | transcript_id | "Novel_001206"; | exon_number | "8"; | gene_type | " |
| At_chr7 | Cufflinks | exon | 4399089 | 4399755 | . | + | . | gene_id | "XLOC_089022"; | transcript_id | "Novel_001206"; | exon_number | "9"; | gene_type | " |
| At_chr7 | Cufflinks | exon | 4451692 | 4452055 | . | + | . | gene_id | "XLOC_089032"; | transcript_id | "Novel_001207"; | exon_number | "1"; | gene_type | " |
| At_chr7 | Cufflinks | exon | 4452175 | 4452253 | . | + | . | gene_id | "XLOC_089032"; | transcript_id | "Novel_001207"; | exon_number | "2"; | gene_type | " |
| At_chr7 | Cufflinks | exon | 4452356 | 4452481 | . | + | . | gene_id | "XLOC_089032"; | transcript_id | "Novel_001207"; | exon_number | "3"; | gene_type | " |
| At_chr7 | Cufflinks | exon | 4594304 | 4595131 | . | + | . | gene_id | "XLOC_089060"; | transcript_id | "Novel_001208"; | exon_number | "1"; | gene_type | " |
| At_chr7 | Cufflinks | exon | 4595239 | 4595495 | . | + | . | gene_id | "XLOC_089060"; | transcript_id | "Novel_001208"; | exon_number | "2"; | gene_type | " |
| At_chr7 | Cufflinks | exon | 4595590 | 4595736 | . | + | . | gene_id | "XLOC_089060"; | transcript_id | "Novel_001208"; | exon_number | "3"; | gene_type | " |
| At_chr7 | Cufflinks | exon | 4596369 | 4596969 | . | + | . | gene_id | "XLOC_089060"; | transcript_id | "Novel_001208"; | exon_number | "4"; | gene_type | " |
| At_chr7 | Cufflinks | exon | 4620472 | 4621120 | . | + | . | gene_id | "XLOC_089065"; | transcript_id | "Novel_001209"; | exon_number | "1"; | gene_type | " |
| At_chr7 | Cufflinks | exon | 4656030 | 4656144 | . | + | . | gene_id | "XLOC_089076"; | transcript_id | "Novel_001210"; | exon_number | "1"; | gene_type | " |
| At_chr7 | Cufflinks | exon | 4656325 | 4656419 | . | + | . | gene_id | "XLOC_089076"; | transcript_id | "Novel_001210"; | exon_number | "2"; | gene_type | " |
| At_chr7 | Cufflinks | exon | 4656907 | 4657012 | . | + | . | gene_id | "XLOC_089076"; | transcript_id | "Novel_001210"; | exon_number | "3"; | gene_type | " |
| At_chr7 | Cufflinks | exon | 4657081 | 4657130 | . | + | . | gene_id | "XLOC_089076"; | transcript_id | "Novel_001210"; | exon_number | "4"; | gene_type | " |
| At_chr7 | Cufflinks | exon | 4657385 | 4658084 | . | + | . | gene_id | "XLOC_089076"; | transcript_id | "Novel_001210"; | exon_number | "5"; | gene_type | " |
| At_chr7 | Cufflinks | exon | 4658224 | 4658270 | . | + | . | gene_id | "XLOC_089076"; | transcript_id | "Novel_001211"; | exon_number | "1"; | gene_type | " |
| At_chr7 | Cufflinks | exon | 4658593 | 4659715 | . | + | . | gene_id | "XLOC_089076"; | transcript_id | "Novel_001211"; | exon_number | "2"; | gene_type | " |
| At_chr7 | Cufflinks | exon | 4659807 | 4660733 | . | + | . | gene_id | "XLOC_089076"; | transcript_id | "Novel_001211"; | exon_number | "3"; | gene_type | " |
| At_chr7 | Cufflinks | exon | 4658612 | 4658655 | . | + | . | gene_id | "XLOC_089076"; | transcript_id | "Novel_001212"; | exon_number | "1"; | gene_type | " |
| At_chr7 | Cufflinks | exon | 4659663 | 4659715 | . | + | . | gene_id | "XLOC_089076"; | transcript_id | "Novel_001212"; | exon_number | "2"; | gene_type | " |
| At_chr7 | Cufflinks | exon | 4659807 | 4660438 | . | + | . | gene_id | "XLOC_089076"; | transcript_id | "Novel_001212"; | exon_number | "3"; | gene_type | " |
| At_chr7 | Cufflinks | exon | 4786795 | 4787620 | . | + | . | gene_id | "XLOC_089100"; | transcript_id | "Novel_001213"; | exon_number | "1"; | gene_type | " |
| At_chr7 | Cufflinks | exon | 4788666 | 4788783 | . | + | . | gene_id | "XLOC_089100"; | transcript_id | "Novel_001213"; | exon_number | "2"; | gene_type | " |
| At_chr7 | Cufflinks | exon | 4788990 | 4789219 | . | + | . | gene_id | "XLOC_089100"; | transcript_id | "Novel_001213"; | exon_number | "3"; | gene_type | " |
| At_chr7 | Cufflinks | exon | 4789314 | 4789553 | . | + | . | gene_id | "XLOC_089100"; | transcript_id | "Novel_001213"; | exon_number | "4"; | gene_type | " |
| At_chr7 | Cufflinks | exon | 4790004 | 4790157 | . | + | . | gene_id | "XLOC_089100"; | transcript_id | "Novel_001213"; | exon_number | "5"; | gene_type | " |
| At_chr7 | Cufflinks | exon | 4790254 | 4790339 | . | + | . | gene_id | "XLOC_089100"; | transcript_id | "Novel_001213"; | exon_number | "6"; | gene_type | " |
| At_chr7 | Cufflinks | exon | 4790856 | 4790970 | . | + | . | gene_id | "XLOC_089100"; | transcript_id | "Novel_001213"; | exon_number | "7"; | gene_type | " |
| At_chr7 | Cufflinks | exon | 4791240 | 4791312 | . | + | . | gene_id | "XLOC_089100"; | transcript_id | "Novel_001213"; | exon_number | "8"; | gene_type | " |
| At_chr7 | Cufflinks | exon | 4791574 | 4791884 | . | + | . | gene_id | "XLOC_089100"; | transcript_id | "Novel_001213"; | exon_number | "9"; | gene_type | " |
| At_chr7 | Cufflinks | exon | 4787346 | 4787620 | . | + | . | gene_id | "XLOC_089100"; | transcript_id | "Novel_001214"; | exon_number | "1"; | gene_type | " |
| At_chr7 | Cufflinks | exon | 4788666 | 4788783 | . | + | . | gene_id | "XLOC_089100"; | transcript_id | "Novel_001214"; | exon_number | "2"; | gene_type | " |
| At_chr7 | Cufflinks | exon | 4788990 | 4789219 | . | + | . | gene_id | "XLOC_089100"; | transcript_id | "Novel_001214"; | exon_number | "3"; | gene_type | " |
| At_chr7 | Cufflinks | exon | 4789314 | 4789553 | . | + | . | gene_id | "XLOC_089100"; | transcript_id | "Novel_001214"; | exon_number | "4"; | gene_type | " |
| At_chr7 | Cufflinks | exon | 4790004 | 4790157 | . | + | . | gene_id | "XLOC_089100"; | transcript_id | "Novel_001214"; | exon_number | "5"; | gene_type | " |

|         |           |      |         |         |   |   |   |         |                |               |                 |             |       |           |   |
|---------|-----------|------|---------|---------|---|---|---|---------|----------------|---------------|-----------------|-------------|-------|-----------|---|
| At_chr7 | Cufflinks | exon | 4790254 | 4790339 | . | + | . | gene_id | "XLOC_089100"; | transcript_id | "Novel_001214"; | exon_number | "6";  | gene_type | " |
| At_chr7 | Cufflinks | exon | 4790666 | 4790763 | . | + | . | gene_id | "XLOC_089100"; | transcript_id | "Novel_001214"; | exon_number | "7";  | gene_type | " |
| At_chr7 | Cufflinks | exon | 4790856 | 4790970 | . | + | . | gene_id | "XLOC_089100"; | transcript_id | "Novel_001214"; | exon_number | "8";  | gene_type | " |
| At_chr7 | Cufflinks | exon | 4791240 | 4791312 | . | + | . | gene_id | "XLOC_089100"; | transcript_id | "Novel_001214"; | exon_number | "9";  | gene_type | " |
| At_chr7 | Cufflinks | exon | 4791574 | 4792087 | . | + | . | gene_id | "XLOC_089100"; | transcript_id | "Novel_001214"; | exon_number | "10"; | gene_type | " |
| At_chr7 | Cufflinks | exon | 6477017 | 6477073 | . | + | . | gene_id | "XLOC_089401"; | transcript_id | "Novel_001215"; | exon_number | "1";  | gene_type | " |
| At_chr7 | Cufflinks | exon | 6478107 | 6479042 | . | + | . | gene_id | "XLOC_089401"; | transcript_id | "Novel_001215"; | exon_number | "2";  | gene_type | " |
| At_chr7 | Cufflinks | exon | 6973307 | 6973367 | . | + | . | gene_id | "XLOC_089489"; | transcript_id | "Novel_001216"; | exon_number | "1";  | gene_type | " |
| At_chr7 | Cufflinks | exon | 6974017 | 6974597 | . | + | . | gene_id | "XLOC_089489"; | transcript_id | "Novel_001216"; | exon_number | "2";  | gene_type | " |
| At_chr7 | Cufflinks | exon | 6974781 | 6974881 | . | + | . | gene_id | "XLOC_089489"; | transcript_id | "Novel_001216"; | exon_number | "3";  | gene_type | " |
| At_chr7 | Cufflinks | exon | 6975270 | 6975353 | . | + | . | gene_id | "XLOC_089489"; | transcript_id | "Novel_001216"; | exon_number | "4";  | gene_type | " |
| At_chr7 | Cufflinks | exon | 6975453 | 6975563 | . | + | . | gene_id | "XLOC_089489"; | transcript_id | "Novel_001216"; | exon_number | "5";  | gene_type | " |
| At_chr7 | Cufflinks | exon | 6975681 | 6976048 | . | + | . | gene_id | "XLOC_089489"; | transcript_id | "Novel_001216"; | exon_number | "6";  | gene_type | " |
| At_chr7 | Cufflinks | exon | 7201472 | 7201677 | . | + | . | gene_id | "XLOC_089526"; | transcript_id | "Novel_001217"; | exon_number | "1";  | gene_type | " |
| At_chr7 | Cufflinks | exon | 7201769 | 7201856 | . | + | . | gene_id | "XLOC_089526"; | transcript_id | "Novel_001217"; | exon_number | "2";  | gene_type | " |
| At_chr7 | Cufflinks | exon | 7201484 | 7201677 | . | + | . | gene_id | "XLOC_089526"; | transcript_id | "Novel_001218"; | exon_number | "1";  | gene_type | " |
| At_chr7 | Cufflinks | exon | 7201769 | 7201834 | . | + | . | gene_id | "XLOC_089526"; | transcript_id | "Novel_001218"; | exon_number | "2";  | gene_type | " |
| At_chr7 | Cufflinks | exon | 7201979 | 7202006 | . | + | . | gene_id | "XLOC_089526"; | transcript_id | "Novel_001218"; | exon_number | "3";  | gene_type | " |
| At_chr7 | Cufflinks | exon | 8627630 | 8627928 | . | + | . | gene_id | "XLOC_089767"; | transcript_id | "Novel_001219"; | exon_number | "1";  | gene_type | " |
| At_chr7 | Cufflinks | exon | 8628443 | 8628663 | . | + | . | gene_id | "XLOC_089767"; | transcript_id | "Novel_001219"; | exon_number | "2";  | gene_type | " |
| At_chr7 | Cufflinks | exon | 8628759 | 8628927 | . | + | . | gene_id | "XLOC_089767"; | transcript_id | "Novel_001219"; | exon_number | "3";  | gene_type | " |
| At_chr7 | Cufflinks | exon | 8629013 | 8629102 | . | + | . | gene_id | "XLOC_089767"; | transcript_id | "Novel_001219"; | exon_number | "4";  | gene_type | " |
| At_chr7 | Cufflinks | exon | 8629194 | 8629495 | . | + | . | gene_id | "XLOC_089767"; | transcript_id | "Novel_001219"; | exon_number | "5";  | gene_type | " |
| At_chr7 | Cufflinks | exon | 8629593 | 8631465 | . | + | . | gene_id | "XLOC_089767"; | transcript_id | "Novel_001219"; | exon_number | "6";  | gene_type | " |
| At_chr7 | Cufflinks | exon | 8627634 | 8627928 | . | + | . | gene_id | "XLOC_089767"; | transcript_id | "Novel_001220"; | exon_number | "1";  | gene_type | " |
| At_chr7 | Cufflinks | exon | 8628443 | 8628663 | . | + | . | gene_id | "XLOC_089767"; | transcript_id | "Novel_001220"; | exon_number | "2";  | gene_type | " |
| At_chr7 | Cufflinks | exon | 8628759 | 8628927 | . | + | . | gene_id | "XLOC_089767"; | transcript_id | "Novel_001220"; | exon_number | "3";  | gene_type | " |
| At_chr7 | Cufflinks | exon | 8629013 | 8629102 | . | + | . | gene_id | "XLOC_089767"; | transcript_id | "Novel_001220"; | exon_number | "4";  | gene_type | " |
| At_chr7 | Cufflinks | exon | 8629194 | 8629495 | . | + | . | gene_id | "XLOC_089767"; | transcript_id | "Novel_001220"; | exon_number | "5";  | gene_type | " |
| At_chr7 | Cufflinks | exon | 8629593 | 8629863 | . | + | . | gene_id | "XLOC_089767"; | transcript_id | "Novel_001220"; | exon_number | "6";  | gene_type | " |
| At_chr7 | Cufflinks | exon | 8630603 | 8631268 | . | + | . | gene_id | "XLOC_089767"; | transcript_id | "Novel_001220"; | exon_number | "7";  | gene_type | " |
| At_chr7 | Cufflinks | exon | 9101848 | 9102394 | . | + | . | gene_id | "XLOC_089841"; | transcript_id | "Novel_001221"; | exon_number | "1";  | gene_type | " |
| At_chr7 | Cufflinks | exon | 9102933 | 9103058 | . | + | . | gene_id | "XLOC_089841"; | transcript_id | "Novel_001221"; | exon_number | "2";  | gene_type | " |
| At_chr7 | Cufflinks | exon | 9103149 | 9103299 | . | + | . | gene_id | "XLOC_089841"; | transcript_id | "Novel_001221"; | exon_number | "3";  | gene_type | " |
| At_chr7 | Cufflinks | exon | 9103411 | 9103867 | . | + | . | gene_id | "XLOC_089841"; | transcript_id | "Novel_001222"; | exon_number | "1";  | gene_type | " |

|         |           |      |          |          |   |   |   |         |                |               |                 |             |      |           |   |
|---------|-----------|------|----------|----------|---|---|---|---------|----------------|---------------|-----------------|-------------|------|-----------|---|
| At_chr7 | Cufflinks | exon | 9104320  | 9104517  | . | + | . | gene_id | "XLOC_089841"; | transcript_id | "Novel_001222"; | exon_number | "2"; | gene_type | " |
| At_chr7 | Cufflinks | exon | 9103455  | 9103486  | . | + | . | gene_id | "XLOC_089841"; | transcript_id | "Novel_001223"; | exon_number | "1"; | gene_type | " |
| At_chr7 | Cufflinks | exon | 9103588  | 9103867  | . | + | . | gene_id | "XLOC_089841"; | transcript_id | "Novel_001223"; | exon_number | "2"; | gene_type | " |
| At_chr7 | Cufflinks | exon | 9104320  | 9104535  | . | + | . | gene_id | "XLOC_089841"; | transcript_id | "Novel_001223"; | exon_number | "3"; | gene_type | " |
| At_chr7 | Cufflinks | exon | 9410794  | 9412752  | . | + | . | gene_id | "XLOC_089912"; | transcript_id | "Novel_001224"; | exon_number | "1"; | gene_type | " |
| At_chr7 | Cufflinks | exon | 9413274  | 9413812  | . | + | . | gene_id | "XLOC_089912"; | transcript_id | "Novel_001224"; | exon_number | "2"; | gene_type | " |
| At_chr7 | Cufflinks | exon | 9569919  | 9570939  | . | + | . | gene_id | "XLOC_089930"; | transcript_id | "Novel_001225"; | exon_number | "1"; | gene_type | " |
| At_chr7 | Cufflinks | exon | 9571088  | 9571168  | . | + | . | gene_id | "XLOC_089930"; | transcript_id | "Novel_001225"; | exon_number | "2"; | gene_type | " |
| At_chr7 | Cufflinks | exon | 9571339  | 9571445  | . | + | . | gene_id | "XLOC_089930"; | transcript_id | "Novel_001225"; | exon_number | "3"; | gene_type | " |
| At_chr7 | Cufflinks | exon | 9571895  | 9572279  | . | + | . | gene_id | "XLOC_089930"; | transcript_id | "Novel_001225"; | exon_number | "4"; | gene_type | " |
| At_chr7 | Cufflinks | exon | 11269554 | 11269855 | . | + | . | gene_id | "XLOC_090147"; | transcript_id | "Novel_001226"; | exon_number | "1"; | gene_type | " |
| At_chr7 | Cufflinks | exon | 11271159 | 11272246 | . | + | . | gene_id | "XLOC_090147"; | transcript_id | "Novel_001226"; | exon_number | "2"; | gene_type | " |
| At_chr7 | Cufflinks | exon | 12040284 | 12040956 | . | + | . | gene_id | "XLOC_090264"; | transcript_id | "Novel_001227"; | exon_number | "1"; | gene_type | " |
| At_chr7 | Cufflinks | exon | 12041550 | 12041634 | . | + | . | gene_id | "XLOC_090264"; | transcript_id | "Novel_001227"; | exon_number | "2"; | gene_type | " |
| At_chr7 | Cufflinks | exon | 12041919 | 12042091 | . | + | . | gene_id | "XLOC_090264"; | transcript_id | "Novel_001227"; | exon_number | "3"; | gene_type | " |
| At_chr7 | Cufflinks | exon | 12042211 | 12042286 | . | + | . | gene_id | "XLOC_090264"; | transcript_id | "Novel_001227"; | exon_number | "4"; | gene_type | " |
| At_chr7 | Cufflinks | exon | 12042391 | 12042453 | . | + | . | gene_id | "XLOC_090264"; | transcript_id | "Novel_001227"; | exon_number | "5"; | gene_type | " |
| At_chr7 | Cufflinks | exon | 12042586 | 12042841 | . | + | . | gene_id | "XLOC_090264"; | transcript_id | "Novel_001227"; | exon_number | "6"; | gene_type | " |
| At_chr7 | Cufflinks | exon | 12040319 | 12040956 | . | + | . | gene_id | "XLOC_090264"; | transcript_id | "Novel_001228"; | exon_number | "1"; | gene_type | " |
| At_chr7 | Cufflinks | exon | 12041550 | 12041634 | . | + | . | gene_id | "XLOC_090264"; | transcript_id | "Novel_001228"; | exon_number | "2"; | gene_type | " |
| At_chr7 | Cufflinks | exon | 12041919 | 12042091 | . | + | . | gene_id | "XLOC_090264"; | transcript_id | "Novel_001228"; | exon_number | "3"; | gene_type | " |
| At_chr7 | Cufflinks | exon | 12042211 | 12042310 | . | + | . | gene_id | "XLOC_090264"; | transcript_id | "Novel_001228"; | exon_number | "4"; | gene_type | " |
| At_chr7 | Cufflinks | exon | 12042391 | 12042453 | . | + | . | gene_id | "XLOC_090264"; | transcript_id | "Novel_001228"; | exon_number | "5"; | gene_type | " |
| At_chr7 | Cufflinks | exon | 12042586 | 12042586 | . | + | . | gene_id | "XLOC_090264"; | transcript_id | "Novel_001228"; | exon_number | "6"; | gene_type | " |
| At_chr7 | Cufflinks | exon | 12040335 | 12040956 | . | + | . | gene_id | "XLOC_090264"; | transcript_id | "Novel_001229"; | exon_number | "1"; | gene_type | " |
| At_chr7 | Cufflinks | exon | 12041550 | 12041634 | . | + | . | gene_id | "XLOC_090264"; | transcript_id | "Novel_001229"; | exon_number | "2"; | gene_type | " |
| At_chr7 | Cufflinks | exon | 12041919 | 12042091 | . | + | . | gene_id | "XLOC_090264"; | transcript_id | "Novel_001229"; | exon_number | "3"; | gene_type | " |
| At_chr7 | Cufflinks | exon | 12042211 | 12042725 | . | + | . | gene_id | "XLOC_090264"; | transcript_id | "Novel_001229"; | exon_number | "4"; | gene_type | " |
| At_chr7 | Cufflinks | exon | 12040397 | 12040956 | . | + | . | gene_id | "XLOC_090264"; | transcript_id | "Novel_001230"; | exon_number | "1"; | gene_type | " |
| At_chr7 | Cufflinks | exon | 12041550 | 12041634 | . | + | . | gene_id | "XLOC_090264"; | transcript_id | "Novel_001230"; | exon_number | "2"; | gene_type | " |
| At_chr7 | Cufflinks | exon | 12041919 | 12042091 | . | + | . | gene_id | "XLOC_090264"; | transcript_id | "Novel_001230"; | exon_number | "3"; | gene_type | " |
| At_chr7 | Cufflinks | exon | 12042211 | 12042286 | . | + | . | gene_id | "XLOC_090264"; | transcript_id | "Novel_001230"; | exon_number | "4"; | gene_type | " |
| At_chr7 | Cufflinks | exon | 12042391 | 12042703 | . | + | . | gene_id | "XLOC_090264"; | transcript_id | "Novel_001230"; | exon_number | "5"; | gene_type | " |
| At_chr7 | Cufflinks | exon | 14182751 | 14182866 | . | + | . | gene_id | "XLOC_090434"; | transcript_id | "Novel_001231"; | exon_number | "1"; | gene_type | " |
| At_chr7 | Cufflinks | exon | 14183114 | 14183177 | . | + | . | gene_id | "XLOC_090434"; | transcript_id | "Novel_001231"; | exon_number | "2"; | gene_type | " |



|         |           |      |          |          |   |   |   |         |                |               |                 |             |      |           |   |
|---------|-----------|------|----------|----------|---|---|---|---------|----------------|---------------|-----------------|-------------|------|-----------|---|
| At_chr7 | Cufflinks | exon | 14183651 | 14183715 | . | + | . | gene_id | "XLOC_090434"; | transcript_id | "Novel_001231"; | exon_number | "3"; | gene_type | " |
| At_chr7 | Cufflinks | exon | 14183949 | 14186343 | . | + | . | gene_id | "XLOC_090434"; | transcript_id | "Novel_001231"; | exon_number | "4"; | gene_type | " |
| At_chr7 | Cufflinks | exon | 14182775 | 14182866 | . | + | . | gene_id | "XLOC_090434"; | transcript_id | "Novel_001232"; | exon_number | "1"; | gene_type | " |
| At_chr7 | Cufflinks | exon | 14183117 | 14183177 | . | + | . | gene_id | "XLOC_090434"; | transcript_id | "Novel_001232"; | exon_number | "2"; | gene_type | " |
| At_chr7 | Cufflinks | exon | 14183651 | 14183715 | . | + | . | gene_id | "XLOC_090434"; | transcript_id | "Novel_001232"; | exon_number | "3"; | gene_type | " |
| At_chr7 | Cufflinks | exon | 14183949 | 14184041 | . | + | . | gene_id | "XLOC_090434"; | transcript_id | "Novel_001232"; | exon_number | "4"; | gene_type | " |
| At_chr7 | Cufflinks | exon | 14184665 | 14184791 | . | + | . | gene_id | "XLOC_090434"; | transcript_id | "Novel_001232"; | exon_number | "5"; | gene_type | " |
| At_chr7 | Cufflinks | exon | 14185232 | 14186783 | . | + | . | gene_id | "XLOC_090434"; | transcript_id | "Novel_001232"; | exon_number | "6"; | gene_type | " |
| At_chr7 | Cufflinks | exon | 16126024 | 16127026 | . | + | . | gene_id | "XLOC_090495"; | transcript_id | "Novel_001233"; | exon_number | "1"; | gene_type | " |
| At_chr7 | Cufflinks | exon | 16127347 | 16131471 | . | + | . | gene_id | "XLOC_090495"; | transcript_id | "Novel_001233"; | exon_number | "2"; | gene_type | " |
| At_chr7 | Cufflinks | exon | 16851500 | 16851794 | . | + | . | gene_id | "XLOC_090550"; | transcript_id | "Novel_001234"; | exon_number | "1"; | gene_type | " |
| At_chr7 | Cufflinks | exon | 16852336 | 16852490 | . | + | . | gene_id | "XLOC_090550"; | transcript_id | "Novel_001234"; | exon_number | "2"; | gene_type | " |
| At_chr7 | Cufflinks | exon | 16853371 | 16853883 | . | + | . | gene_id | "XLOC_090550"; | transcript_id | "Novel_001234"; | exon_number | "3"; | gene_type | " |
| At_chr7 | Cufflinks | exon | 28535667 | 28538455 | . | + | . | gene_id | "XLOC_090971"; | transcript_id | "Novel_001235"; | exon_number | "1"; | gene_type | " |
| At_chr7 | Cufflinks | exon | 29066333 | 29066436 | . | + | . | gene_id | "XLOC_091046"; | transcript_id | "Novel_001236"; | exon_number | "1"; | gene_type | " |
| At_chr7 | Cufflinks | exon | 29066529 | 29066610 | . | + | . | gene_id | "XLOC_091046"; | transcript_id | "Novel_001236"; | exon_number | "2"; | gene_type | " |
| At_chr7 | Cufflinks | exon | 29066766 | 29066900 | . | + | . | gene_id | "XLOC_091046"; | transcript_id | "Novel_001236"; | exon_number | "3"; | gene_type | " |
| At_chr7 | Cufflinks | exon | 29066360 | 29066436 | . | + | . | gene_id | "XLOC_091046"; | transcript_id | "Novel_001237"; | exon_number | "1"; | gene_type | " |
| At_chr7 | Cufflinks | exon | 29066529 | 29066610 | . | + | . | gene_id | "XLOC_091046"; | transcript_id | "Novel_001237"; | exon_number | "2"; | gene_type | " |
| At_chr7 | Cufflinks | exon | 29066766 | 29066885 | . | + | . | gene_id | "XLOC_091046"; | transcript_id | "Novel_001237"; | exon_number | "3"; | gene_type | " |
| At_chr7 | Cufflinks | exon | 29066961 | 29067039 | . | + | . | gene_id | "XLOC_091046"; | transcript_id | "Novel_001237"; | exon_number | "4"; | gene_type | " |
| At_chr7 | Cufflinks | exon | 29067708 | 29067794 | . | + | . | gene_id | "XLOC_091046"; | transcript_id | "Novel_001237"; | exon_number | "5"; | gene_type | " |
| At_chr7 | Cufflinks | exon | 29068948 | 29069010 | . | + | . | gene_id | "XLOC_091046"; | transcript_id | "Novel_001237"; | exon_number | "6"; | gene_type | " |
| At_chr7 | Cufflinks | exon | 29069410 | 29069546 | . | + | . | gene_id | "XLOC_091046"; | transcript_id | "Novel_001237"; | exon_number | "7"; | gene_type | " |
| At_chr7 | Cufflinks | exon | 29070630 | 29070806 | . | + | . | gene_id | "XLOC_091050"; | transcript_id | "Novel_001238"; | exon_number | "1"; | gene_type | " |
| At_chr7 | Cufflinks | exon | 29070897 | 29071550 | . | + | . | gene_id | "XLOC_091050"; | transcript_id | "Novel_001238"; | exon_number | "2"; | gene_type | " |
| At_chr7 | Cufflinks | exon | 29072079 | 29072152 | . | + | . | gene_id | "XLOC_091050"; | transcript_id | "Novel_001238"; | exon_number | "3"; | gene_type | " |
| At_chr7 | Cufflinks | exon | 29072247 | 29072338 | . | + | . | gene_id | "XLOC_091050"; | transcript_id | "Novel_001238"; | exon_number | "4"; | gene_type | " |
| At_chr7 | Cufflinks | exon | 29073375 | 29073444 | . | + | . | gene_id | "XLOC_091050"; | transcript_id | "Novel_001238"; | exon_number | "5"; | gene_type | " |
| At_chr7 | Cufflinks | exon | 29074733 | 29074823 | . | + | . | gene_id | "XLOC_091050"; | transcript_id | "Novel_001238"; | exon_number | "6"; | gene_type | " |
| At_chr7 | Cufflinks | exon | 29074917 | 29074967 | . | + | . | gene_id | "XLOC_091050"; | transcript_id | "Novel_001238"; | exon_number | "7"; | gene_type | " |
| At_chr7 | Cufflinks | exon | 29075544 | 29076796 | . | + | . | gene_id | "XLOC_091050"; | transcript_id | "Novel_001238"; | exon_number | "8"; | gene_type | " |
| At_chr7 | Cufflinks | exon | 29070679 | 29071550 | . | + | . | gene_id | "XLOC_091050"; | transcript_id | "Novel_001239"; | exon_number | "1"; | gene_type | " |
| At_chr7 | Cufflinks | exon | 29072079 | 29072152 | . | + | . | gene_id | "XLOC_091050"; | transcript_id | "Novel_001239"; | exon_number | "2"; | gene_type | " |
| At_chr7 | Cufflinks | exon | 29072247 | 29072338 | . | + | . | gene_id | "XLOC_091050"; | transcript_id | "Novel_001239"; | exon_number | "3"; | gene_type | " |

|         |           |      |          |          |   |   |   |         |                |               |                 |             |      |           |   |
|---------|-----------|------|----------|----------|---|---|---|---------|----------------|---------------|-----------------|-------------|------|-----------|---|
| At_chr7 | Cufflinks | exon | 29073375 | 29073444 | . | + | . | gene_id | "XLOC_091050"; | transcript_id | "Novel_001239"; | exon_number | "4"; | gene_type | " |
| At_chr7 | Cufflinks | exon | 29074733 | 29074823 | . | + | . | gene_id | "XLOC_091050"; | transcript_id | "Novel_001239"; | exon_number | "5"; | gene_type | " |
| At_chr7 | Cufflinks | exon | 29074917 | 29074967 | . | + | . | gene_id | "XLOC_091050"; | transcript_id | "Novel_001239"; | exon_number | "6"; | gene_type | " |
| At_chr7 | Cufflinks | exon | 29075544 | 29076543 | . | + | . | gene_id | "XLOC_091050"; | transcript_id | "Novel_001239"; | exon_number | "7"; | gene_type | " |
| At_chr7 | Cufflinks | exon | 29074083 | 29074967 | . | + | . | gene_id | "XLOC_091050"; | transcript_id | "Novel_001240"; | exon_number | "1"; | gene_type | " |
| At_chr7 | Cufflinks | exon | 29075544 | 29076386 | . | + | . | gene_id | "XLOC_091050"; | transcript_id | "Novel_001240"; | exon_number | "2"; | gene_type | " |
| At_chr7 | Cufflinks | exon | 31638901 | 31639543 | . | + | . | gene_id | "XLOC_091279"; | transcript_id | "Novel_001241"; | exon_number | "1"; | gene_type | " |
| At_chr7 | Cufflinks | exon | 31640248 | 31640692 | . | + | . | gene_id | "XLOC_091279"; | transcript_id | "Novel_001241"; | exon_number | "2"; | gene_type | " |
| At_chr7 | Cufflinks | exon | 31640773 | 31642447 | . | + | . | gene_id | "XLOC_091279"; | transcript_id | "Novel_001242"; | exon_number | "1"; | gene_type | " |
| At_chr7 | Cufflinks | exon | 31642559 | 31643596 | . | + | . | gene_id | "XLOC_091279"; | transcript_id | "Novel_001242"; | exon_number | "2"; | gene_type | " |
| At_chr7 | Cufflinks | exon | 1942533  | 1943878  | . | - | . | gene_id | "XLOC_091584"; | transcript_id | "Novel_001243"; | exon_number | "1"; | gene_type | " |
| At_chr7 | Cufflinks | exon | 1944143  | 1945002  | . | - | . | gene_id | "XLOC_091584"; | transcript_id | "Novel_001243"; | exon_number | "2"; | gene_type | " |
| At_chr7 | Cufflinks | exon | 2212629  | 2212933  | . | - | . | gene_id | "XLOC_091609"; | transcript_id | "Novel_001244"; | exon_number | "1"; | gene_type | " |
| At_chr7 | Cufflinks | exon | 2214798  | 2215046  | . | - | . | gene_id | "XLOC_091609"; | transcript_id | "Novel_001244"; | exon_number | "2"; | gene_type | " |
| At_chr7 | Cufflinks | exon | 2215147  | 2215179  | . | - | . | gene_id | "XLOC_091609"; | transcript_id | "Novel_001244"; | exon_number | "3"; | gene_type | " |
| At_chr7 | Cufflinks | exon | 2215651  | 2215835  | . | - | . | gene_id | "XLOC_091609"; | transcript_id | "Novel_001244"; | exon_number | "4"; | gene_type | " |
| At_chr7 | Cufflinks | exon | 2223605  | 2223834  | . | - | . | gene_id | "XLOC_091614"; | transcript_id | "Novel_001245"; | exon_number | "1"; | gene_type | " |
| At_chr7 | Cufflinks | exon | 2223935  | 2223983  | . | - | . | gene_id | "XLOC_091614"; | transcript_id | "Novel_001245"; | exon_number | "2"; | gene_type | " |
| At_chr7 | Cufflinks | exon | 2224164  | 2224365  | . | - | . | gene_id | "XLOC_091614"; | transcript_id | "Novel_001245"; | exon_number | "3"; | gene_type | " |
| At_chr7 | Cufflinks | exon | 4252482  | 4252686  | . | - | . | gene_id | "XLOC_091892"; | transcript_id | "Novel_001246"; | exon_number | "1"; | gene_type | " |
| At_chr7 | Cufflinks | exon | 4500396  | 4502277  | . | - | . | gene_id | "XLOC_091924"; | transcript_id | "Novel_001247"; | exon_number | "1"; | gene_type | " |
| At_chr7 | Cufflinks | exon | 4581122  | 4581289  | . | - | . | gene_id | "XLOC_091935"; | transcript_id | "Novel_001248"; | exon_number | "1"; | gene_type | " |
| At_chr7 | Cufflinks | exon | 4581389  | 4581458  | . | - | . | gene_id | "XLOC_091935"; | transcript_id | "Novel_001248"; | exon_number | "2"; | gene_type | " |
| At_chr7 | Cufflinks | exon | 4581545  | 4581638  | . | - | . | gene_id | "XLOC_091935"; | transcript_id | "Novel_001248"; | exon_number | "3"; | gene_type | " |
| At_chr7 | Cufflinks | exon | 4581952  | 4582052  | . | - | . | gene_id | "XLOC_091935"; | transcript_id | "Novel_001248"; | exon_number | "4"; | gene_type | " |
| At_chr7 | Cufflinks | exon | 4582248  | 4582316  | . | - | . | gene_id | "XLOC_091935"; | transcript_id | "Novel_001248"; | exon_number | "5"; | gene_type | " |
| At_chr7 | Cufflinks | exon | 4582398  | 4583146  | . | - | . | gene_id | "XLOC_091935"; | transcript_id | "Novel_001248"; | exon_number | "6"; | gene_type | " |
| At_chr7 | Cufflinks | exon | 4581122  | 4581289  | . | - | . | gene_id | "XLOC_091935"; | transcript_id | "Novel_001249"; | exon_number | "1"; | gene_type | " |
| At_chr7 | Cufflinks | exon | 4581389  | 4581458  | . | - | . | gene_id | "XLOC_091935"; | transcript_id | "Novel_001249"; | exon_number | "2"; | gene_type | " |
| At_chr7 | Cufflinks | exon | 4581545  | 4581638  | . | - | . | gene_id | "XLOC_091935"; | transcript_id | "Novel_001249"; | exon_number | "3"; | gene_type | " |
| At_chr7 | Cufflinks | exon | 4581952  | 4582052  | . | - | . | gene_id | "XLOC_091935"; | transcript_id | "Novel_001249"; | exon_number | "4"; | gene_type | " |
| At_chr7 | Cufflinks | exon | 4582248  | 4582316  | . | - | . | gene_id | "XLOC_091935"; | transcript_id | "Novel_001249"; | exon_number | "5"; | gene_type | " |
| At_chr7 | Cufflinks | exon | 4582398  | 4582612  | . | - | . | gene_id | "XLOC_091935"; | transcript_id | "Novel_001249"; | exon_number | "6"; | gene_type | " |
| At_chr7 | Cufflinks | exon | 4583174  | 4583222  | . | - | . | gene_id | "XLOC_091935"; | transcript_id | "Novel_001249"; | exon_number | "7"; | gene_type | " |
| At_chr7 | Cufflinks | exon | 4583435  | 4583566  | . | - | . | gene_id | "XLOC_091935"; | transcript_id | "Novel_001249"; | exon_number | "8"; | gene_type | " |

|         |           |      |         |         |   |   |         |                |               |                 |             |      |           |   |
|---------|-----------|------|---------|---------|---|---|---------|----------------|---------------|-----------------|-------------|------|-----------|---|
| At_chr7 | Cufflinks | exon | 4583902 | 4584499 | . | . | gene_id | "XLOC_091935"; | transcript_id | "Novel_001249"; | exon_number | "9"; | gene_type | " |
| At_chr7 | Cufflinks | exon | 4581125 | 4581638 | . | . | gene_id | "XLOC_091935"; | transcript_id | "Novel_001250"; | exon_number | "1"; | gene_type | " |
| At_chr7 | Cufflinks | exon | 4581952 | 4582052 | . | . | gene_id | "XLOC_091935"; | transcript_id | "Novel_001250"; | exon_number | "2"; | gene_type | " |
| At_chr7 | Cufflinks | exon | 4582248 | 4582316 | . | . | gene_id | "XLOC_091935"; | transcript_id | "Novel_001250"; | exon_number | "3"; | gene_type | " |
| At_chr7 | Cufflinks | exon | 4582398 | 4582612 | . | . | gene_id | "XLOC_091935"; | transcript_id | "Novel_001250"; | exon_number | "4"; | gene_type | " |
| At_chr7 | Cufflinks | exon | 4583174 | 4583222 | . | . | gene_id | "XLOC_091935"; | transcript_id | "Novel_001250"; | exon_number | "5"; | gene_type | " |
| At_chr7 | Cufflinks | exon | 4583435 | 4583566 | . | . | gene_id | "XLOC_091935"; | transcript_id | "Novel_001250"; | exon_number | "6"; | gene_type | " |
| At_chr7 | Cufflinks | exon | 4583902 | 4584479 | . | . | gene_id | "XLOC_091935"; | transcript_id | "Novel_001250"; | exon_number | "7"; | gene_type | " |
| At_chr7 | Cufflinks | exon | 4581131 | 4581289 | . | . | gene_id | "XLOC_091935"; | transcript_id | "Novel_001251"; | exon_number | "1"; | gene_type | " |
| At_chr7 | Cufflinks | exon | 4581389 | 4581458 | . | . | gene_id | "XLOC_091935"; | transcript_id | "Novel_001251"; | exon_number | "2"; | gene_type | " |
| At_chr7 | Cufflinks | exon | 4581545 | 4581638 | . | . | gene_id | "XLOC_091935"; | transcript_id | "Novel_001251"; | exon_number | "3"; | gene_type | " |
| At_chr7 | Cufflinks | exon | 4581952 | 4582052 | . | . | gene_id | "XLOC_091935"; | transcript_id | "Novel_001251"; | exon_number | "4"; | gene_type | " |
| At_chr7 | Cufflinks | exon | 4582248 | 4582316 | . | . | gene_id | "XLOC_091935"; | transcript_id | "Novel_001251"; | exon_number | "5"; | gene_type | " |
| At_chr7 | Cufflinks | exon | 4582398 | 4582612 | . | . | gene_id | "XLOC_091935"; | transcript_id | "Novel_001251"; | exon_number | "6"; | gene_type | " |
| At_chr7 | Cufflinks | exon | 4583174 | 4583222 | . | . | gene_id | "XLOC_091935"; | transcript_id | "Novel_001251"; | exon_number | "7"; | gene_type | " |
| At_chr7 | Cufflinks | exon | 4583435 | 4584417 | . | . | gene_id | "XLOC_091935"; | transcript_id | "Novel_001251"; | exon_number | "8"; | gene_type | " |
| At_chr7 | Cufflinks | exon | 4584540 | 4584940 | . | . | gene_id | "XLOC_091936"; | transcript_id | "Novel_001252"; | exon_number | "1"; | gene_type | " |
| At_chr7 | Cufflinks | exon | 4586038 | 4586121 | . | . | gene_id | "XLOC_091936"; | transcript_id | "Novel_001252"; | exon_number | "2"; | gene_type | " |
| At_chr7 | Cufflinks | exon | 4608888 | 4609090 | . | . | gene_id | "XLOC_091938"; | transcript_id | "Novel_001253"; | exon_number | "1"; | gene_type | " |
| At_chr7 | Cufflinks | exon | 6022458 | 6023485 | . | . | gene_id | "XLOC_092193"; | transcript_id | "Novel_001254"; | exon_number | "1"; | gene_type | " |
| At_chr7 | Cufflinks | exon | 6023616 | 6023745 | . | . | gene_id | "XLOC_092193"; | transcript_id | "Novel_001254"; | exon_number | "2"; | gene_type | " |
| At_chr7 | Cufflinks | exon | 6024017 | 6024387 | . | . | gene_id | "XLOC_092193"; | transcript_id | "Novel_001254"; | exon_number | "3"; | gene_type | " |
| At_chr7 | Cufflinks | exon | 7580148 | 7580915 | . | . | gene_id | "XLOC_092473"; | transcript_id | "Novel_001255"; | exon_number | "1"; | gene_type | " |
| At_chr7 | Cufflinks | exon | 7581002 | 7581092 | . | . | gene_id | "XLOC_092473"; | transcript_id | "Novel_001255"; | exon_number | "2"; | gene_type | " |
| At_chr7 | Cufflinks | exon | 7581291 | 7583232 | . | . | gene_id | "XLOC_092473"; | transcript_id | "Novel_001255"; | exon_number | "3"; | gene_type | " |
| At_chr7 | Cufflinks | exon | 7585874 | 7587235 | . | . | gene_id | "XLOC_092473"; | transcript_id | "Novel_001256"; | exon_number | "1"; | gene_type | " |
| At_chr7 | Cufflinks | exon | 7587666 | 7587914 | . | . | gene_id | "XLOC_092473"; | transcript_id | "Novel_001256"; | exon_number | "2"; | gene_type | " |
| At_chr7 | Cufflinks | exon | 8324821 | 8325173 | . | . | gene_id | "XLOC_092566"; | transcript_id | "Novel_001257"; | exon_number | "1"; | gene_type | " |
| At_chr7 | Cufflinks | exon | 9357728 | 9358629 | . | . | gene_id | "XLOC_092758"; | transcript_id | "Novel_001258"; | exon_number | "1"; | gene_type | " |
| At_chr7 | Cufflinks | exon | 9358763 | 9358870 | . | . | gene_id | "XLOC_092758"; | transcript_id | "Novel_001258"; | exon_number | "2"; | gene_type | " |
| At_chr7 | Cufflinks | exon | 9360301 | 9360705 | . | . | gene_id | "XLOC_092758"; | transcript_id | "Novel_001259"; | exon_number | "1"; | gene_type | " |
| At_chr7 | Cufflinks | exon | 9361095 | 9361150 | . | . | gene_id | "XLOC_092758"; | transcript_id | "Novel_001259"; | exon_number | "2"; | gene_type | " |
| At_chr7 | Cufflinks | exon | 9361541 | 9361647 | . | . | gene_id | "XLOC_092758"; | transcript_id | "Novel_001259"; | exon_number | "3"; | gene_type | " |
| At_chr7 | Cufflinks | exon | 9361730 | 9362769 | . | . | gene_id | "XLOC_092758"; | transcript_id | "Novel_001259"; | exon_number | "4"; | gene_type | " |
| At_chr7 | Cufflinks | exon | 9550967 | 9551208 | . | . | gene_id | "XLOC_092798"; | transcript_id | "Novel_001260"; | exon_number | "1"; | gene_type | " |

|         |           |      |          |          |   |   |         |                |               |                 |             |      |           |   |
|---------|-----------|------|----------|----------|---|---|---------|----------------|---------------|-----------------|-------------|------|-----------|---|
| At_chr7 | Cufflinks | exon | 9551807  | 9551957  | . | . | gene_id | "XLOC_092798"; | transcript_id | "Novel_001260"; | exon_number | "2"; | gene_type | " |
| At_chr7 | Cufflinks | exon | 9552339  | 9552985  | . | . | gene_id | "XLOC_092798"; | transcript_id | "Novel_001260"; | exon_number | "3"; | gene_type | " |
| At_chr7 | Cufflinks | exon | 9553212  | 9553257  | . | . | gene_id | "XLOC_092798"; | transcript_id | "Novel_001260"; | exon_number | "4"; | gene_type | " |
| At_chr7 | Cufflinks | exon | 9553390  | 9553425  | . | . | gene_id | "XLOC_092798"; | transcript_id | "Novel_001260"; | exon_number | "5"; | gene_type | " |
| At_chr7 | Cufflinks | exon | 9764400  | 9766454  | . | . | gene_id | "XLOC_092842"; | transcript_id | "Novel_001261"; | exon_number | "1"; | gene_type | " |
| At_chr7 | Cufflinks | exon | 9782868  | 9783039  | . | . | gene_id | "XLOC_092842"; | transcript_id | "Novel_001261"; | exon_number | "2"; | gene_type | " |
| At_chr7 | Cufflinks | exon | 9783313  | 9783547  | . | . | gene_id | "XLOC_092842"; | transcript_id | "Novel_001261"; | exon_number | "3"; | gene_type | " |
| At_chr7 | Cufflinks | exon | 9850256  | 9851335  | . | . | gene_id | "XLOC_092859"; | transcript_id | "Novel_001262"; | exon_number | "1"; | gene_type | " |
| At_chr7 | Cufflinks | exon | 9851607  | 9851822  | . | . | gene_id | "XLOC_092859"; | transcript_id | "Novel_001262"; | exon_number | "2"; | gene_type | " |
| At_chr7 | Cufflinks | exon | 9896750  | 9897827  | . | . | gene_id | "XLOC_092864"; | transcript_id | "Novel_001263"; | exon_number | "1"; | gene_type | " |
| At_chr7 | Cufflinks | exon | 9898338  | 9898411  | . | . | gene_id | "XLOC_092864"; | transcript_id | "Novel_001263"; | exon_number | "2"; | gene_type | " |
| At_chr7 | Cufflinks | exon | 9898503  | 9898730  | . | . | gene_id | "XLOC_092864"; | transcript_id | "Novel_001263"; | exon_number | "3"; | gene_type | " |
| At_chr7 | Cufflinks | exon | 9901035  | 9901549  | . | . | gene_id | "XLOC_092865"; | transcript_id | "Novel_001264"; | exon_number | "1"; | gene_type | " |
| At_chr7 | Cufflinks | exon | 9901691  | 9902558  | . | . | gene_id | "XLOC_092865"; | transcript_id | "Novel_001264"; | exon_number | "2"; | gene_type | " |
| At_chr7 | Cufflinks | exon | 10081551 | 10082079 | . | . | gene_id | "XLOC_092902"; | transcript_id | "Novel_001265"; | exon_number | "1"; | gene_type | " |
| At_chr7 | Cufflinks | exon | 10083518 | 10083665 | . | . | gene_id | "XLOC_092902"; | transcript_id | "Novel_001265"; | exon_number | "2"; | gene_type | " |
| At_chr7 | Cufflinks | exon | 10083828 | 10084011 | . | . | gene_id | "XLOC_092902"; | transcript_id | "Novel_001265"; | exon_number | "3"; | gene_type | " |
| At_chr7 | Cufflinks | exon | 11343635 | 11343965 | . | . | gene_id | "XLOC_093100"; | transcript_id | "Novel_001266"; | exon_number | "1"; | gene_type | " |
| At_chr7 | Cufflinks | exon | 11344150 | 11344310 | . | . | gene_id | "XLOC_093100"; | transcript_id | "Novel_001266"; | exon_number | "2"; | gene_type | " |
| At_chr7 | Cufflinks | exon | 11344412 | 11344540 | . | . | gene_id | "XLOC_093100"; | transcript_id | "Novel_001266"; | exon_number | "3"; | gene_type | " |
| At_chr7 | Cufflinks | exon | 11344636 | 11344729 | . | . | gene_id | "XLOC_093100"; | transcript_id | "Novel_001266"; | exon_number | "4"; | gene_type | " |
| At_chr7 | Cufflinks | exon | 11344958 | 11345031 | . | . | gene_id | "XLOC_093100"; | transcript_id | "Novel_001266"; | exon_number | "5"; | gene_type | " |
| At_chr7 | Cufflinks | exon | 11345129 | 11345264 | . | . | gene_id | "XLOC_093100"; | transcript_id | "Novel_001266"; | exon_number | "6"; | gene_type | " |
| At_chr7 | Cufflinks | exon | 11345349 | 11345508 | . | . | gene_id | "XLOC_093100"; | transcript_id | "Novel_001266"; | exon_number | "7"; | gene_type | " |
| At_chr7 | Cufflinks | exon | 14001373 | 14001575 | . | . | gene_id | "XLOC_093368"; | transcript_id | "Novel_001267"; | exon_number | "1"; | gene_type | " |
| At_chr7 | Cufflinks | exon | 14001836 | 14001873 | . | . | gene_id | "XLOC_093368"; | transcript_id | "Novel_001267"; | exon_number | "2"; | gene_type | " |
| At_chr7 | Cufflinks | exon | 16983056 | 16983476 | . | . | gene_id | "XLOC_093492"; | transcript_id | "Novel_001268"; | exon_number | "1"; | gene_type | " |
| At_chr7 | Cufflinks | exon | 16984363 | 16984783 | . | . | gene_id | "XLOC_093492"; | transcript_id | "Novel_001268"; | exon_number | "2"; | gene_type | " |
| At_chr7 | Cufflinks | exon | 28003436 | 28003767 | . | . | gene_id | "XLOC_093847"; | transcript_id | "Novel_001269"; | exon_number | "1"; | gene_type | " |
| At_chr7 | Cufflinks | exon | 28003947 | 28004003 | . | . | gene_id | "XLOC_093847"; | transcript_id | "Novel_001269"; | exon_number | "2"; | gene_type | " |
| At_chr7 | Cufflinks | exon | 28004079 | 28004222 | . | . | gene_id | "XLOC_093847"; | transcript_id | "Novel_001269"; | exon_number | "3"; | gene_type | " |
| At_chr7 | Cufflinks | exon | 28004815 | 28004931 | . | . | gene_id | "XLOC_093847"; | transcript_id | "Novel_001269"; | exon_number | "4"; | gene_type | " |
| At_chr7 | Cufflinks | exon | 28005016 | 28005216 | . | . | gene_id | "XLOC_093847"; | transcript_id | "Novel_001269"; | exon_number | "5"; | gene_type | " |
| At_chr7 | Cufflinks | exon | 28005314 | 28005516 | . | . | gene_id | "XLOC_093847"; | transcript_id | "Novel_001269"; | exon_number | "6"; | gene_type | " |
| At_chr7 | Cufflinks | exon | 28006105 | 28006212 | . | . | gene_id | "XLOC_093847"; | transcript_id | "Novel_001269"; | exon_number | "7"; | gene_type | " |

|         |           |      |          |          |   |   |   |         |                |               |                 |             |       |           |   |
|---------|-----------|------|----------|----------|---|---|---|---------|----------------|---------------|-----------------|-------------|-------|-----------|---|
| At_chr7 | Cufflinks | exon | 28006307 | 28006381 | . | - | . | gene_id | "XLOC_093847"; | transcript_id | "Novel_001269"; | exon_number | "8";  | gene_type | " |
| At_chr7 | Cufflinks | exon | 28006459 | 28006918 | . | - | . | gene_id | "XLOC_093847"; | transcript_id | "Novel_001269"; | exon_number | "9";  | gene_type | " |
| At_chr7 | Cufflinks | exon | 28007020 | 28007081 | . | - | . | gene_id | "XLOC_093847"; | transcript_id | "Novel_001269"; | exon_number | "10"; | gene_type | " |
| At_chr7 | Cufflinks | exon | 28007413 | 28007551 | . | - | . | gene_id | "XLOC_093847"; | transcript_id | "Novel_001269"; | exon_number | "11"; | gene_type | " |
| At_chr7 | Cufflinks | exon | 28005130 | 28006212 | . | - | . | gene_id | "XLOC_093847"; | transcript_id | "Novel_001270"; | exon_number | "1";  | gene_type | " |
| At_chr7 | Cufflinks | exon | 28006307 | 28006381 | . | - | . | gene_id | "XLOC_093847"; | transcript_id | "Novel_001270"; | exon_number | "2";  | gene_type | " |
| At_chr7 | Cufflinks | exon | 28006459 | 28006918 | . | - | . | gene_id | "XLOC_093847"; | transcript_id | "Novel_001270"; | exon_number | "3";  | gene_type | " |
| At_chr7 | Cufflinks | exon | 28007020 | 28007081 | . | - | . | gene_id | "XLOC_093847"; | transcript_id | "Novel_001270"; | exon_number | "4";  | gene_type | " |
| At_chr7 | Cufflinks | exon | 28007413 | 28007553 | . | - | . | gene_id | "XLOC_093847"; | transcript_id | "Novel_001270"; | exon_number | "5";  | gene_type | " |
| At_chr7 | Cufflinks | exon | 28488517 | 28491003 | . | - | . | gene_id | "XLOC_093879"; | transcript_id | "Novel_001271"; | exon_number | "1";  | gene_type | " |
| At_chr7 | Cufflinks | exon | 28491104 | 28492805 | . | - | . | gene_id | "XLOC_093879"; | transcript_id | "Novel_001271"; | exon_number | "2";  | gene_type | " |
| At_chr7 | Cufflinks | exon | 28574602 | 28575075 | . | - | . | gene_id | "XLOC_093884"; | transcript_id | "Novel_001272"; | exon_number | "1";  | gene_type | " |
| At_chr7 | Cufflinks | exon | 28575331 | 28575470 | . | - | . | gene_id | "XLOC_093884"; | transcript_id | "Novel_001272"; | exon_number | "2";  | gene_type | " |
| At_chr7 | Cufflinks | exon | 28576940 | 28577021 | . | - | . | gene_id | "XLOC_093884"; | transcript_id | "Novel_001272"; | exon_number | "3";  | gene_type | " |
| At_chr7 | Cufflinks | exon | 28577098 | 28577197 | . | - | . | gene_id | "XLOC_093884"; | transcript_id | "Novel_001272"; | exon_number | "4";  | gene_type | " |
| At_chr7 | Cufflinks | exon | 29084219 | 29085393 | . | - | . | gene_id | "XLOC_093925"; | transcript_id | "Novel_001273"; | exon_number | "1";  | gene_type | " |
| At_chr7 | Cufflinks | exon | 29085482 | 29085985 | . | - | . | gene_id | "XLOC_093925"; | transcript_id | "Novel_001273"; | exon_number | "2";  | gene_type | " |
| At_chr7 | Cufflinks | exon | 29661615 | 29661706 | . | - | . | gene_id | "XLOC_093969"; | transcript_id | "Novel_001274"; | exon_number | "1";  | gene_type | " |
| At_chr7 | Cufflinks | exon | 29661830 | 29661905 | . | - | . | gene_id | "XLOC_093969"; | transcript_id | "Novel_001274"; | exon_number | "2";  | gene_type | " |
| At_chr7 | Cufflinks | exon | 29663139 | 29663211 | . | - | . | gene_id | "XLOC_093969"; | transcript_id | "Novel_001274"; | exon_number | "3";  | gene_type | " |
| At_chr7 | Cufflinks | exon | 29663617 | 29663674 | . | - | . | gene_id | "XLOC_093969"; | transcript_id | "Novel_001274"; | exon_number | "4";  | gene_type | " |
| At_chr7 | Cufflinks | exon | 29663813 | 29664016 | . | - | . | gene_id | "XLOC_093969"; | transcript_id | "Novel_001274"; | exon_number | "5";  | gene_type | " |
| At_chr8 | Cufflinks | exon | 3194585  | 3194790  | . | + | . | gene_id | "XLOC_094507"; | transcript_id | "Novel_001275"; | exon_number | "1";  | gene_type | " |
| At_chr8 | Cufflinks | exon | 3196195  | 3196273  | . | + | . | gene_id | "XLOC_094507"; | transcript_id | "Novel_001275"; | exon_number | "2";  | gene_type | " |
| At_chr8 | Cufflinks | exon | 3196704  | 3196803  | . | + | . | gene_id | "XLOC_094507"; | transcript_id | "Novel_001275"; | exon_number | "3";  | gene_type | " |
| At_chr8 | Cufflinks | exon | 3197107  | 3201456  | . | + | . | gene_id | "XLOC_094507"; | transcript_id | "Novel_001275"; | exon_number | "4";  | gene_type | " |
| At_chr8 | Cufflinks | exon | 12843221 | 12843343 | . | + | . | gene_id | "XLOC_094869"; | transcript_id | "Novel_001276"; | exon_number | "1";  | gene_type | " |
| At_chr8 | Cufflinks | exon | 12843786 | 12844699 | . | + | . | gene_id | "XLOC_094869"; | transcript_id | "Novel_001276"; | exon_number | "2";  | gene_type | " |
| At_chr8 | Cufflinks | exon | 12869755 | 12870089 | . | + | . | gene_id | "XLOC_094875"; | transcript_id | "Novel_001277"; | exon_number | "1";  | gene_type | " |
| At_chr8 | Cufflinks | exon | 12870983 | 12871668 | . | + | . | gene_id | "XLOC_094875"; | transcript_id | "Novel_001277"; | exon_number | "2";  | gene_type | " |
| At_chr8 | Cufflinks | exon | 13108922 | 13109164 | . | + | . | gene_id | "XLOC_094896"; | transcript_id | "Novel_001278"; | exon_number | "1";  | gene_type | " |
| At_chr8 | Cufflinks | exon | 13109253 | 13109390 | . | + | . | gene_id | "XLOC_094896"; | transcript_id | "Novel_001278"; | exon_number | "2";  | gene_type | " |
| At_chr8 | Cufflinks | exon | 13116126 | 13117210 | . | + | . | gene_id | "XLOC_094896"; | transcript_id | "Novel_001278"; | exon_number | "3";  | gene_type | " |
| At_chr8 | Cufflinks | exon | 24783638 | 24783960 | . | + | . | gene_id | "XLOC_095334"; | transcript_id | "Novel_001279"; | exon_number | "1";  | gene_type | " |
| At_chr8 | Cufflinks | exon | 24784404 | 24784457 | . | + | . | gene_id | "XLOC_095334"; | transcript_id | "Novel_001279"; | exon_number | "2";  | gene_type | " |

|         |           |      |          |          |   |   |   |         |                |               |                 |             |      |           |   |
|---------|-----------|------|----------|----------|---|---|---|---------|----------------|---------------|-----------------|-------------|------|-----------|---|
| At_chr8 | Cufflinks | exon | 24784636 | 24784659 | . | + | . | gene_id | "XLOC_095334"; | transcript_id | "Novel_001279"; | exon_number | "3"; | gene_type | " |
| At_chr8 | Cufflinks | exon | 24784724 | 24784747 | . | + | . | gene_id | "XLOC_095334"; | transcript_id | "Novel_001279"; | exon_number | "4"; | gene_type | " |
| At_chr8 | Cufflinks | exon | 30343101 | 30343348 | . | + | . | gene_id | "XLOC_095484"; | transcript_id | "Novel_001280"; | exon_number | "1"; | gene_type | " |
| At_chr8 | Cufflinks | exon | 30343453 | 30343500 | . | + | . | gene_id | "XLOC_095484"; | transcript_id | "Novel_001280"; | exon_number | "2"; | gene_type | " |
| At_chr8 | Cufflinks | exon | 31658968 | 31659239 | . | + | . | gene_id | "XLOC_095521"; | transcript_id | "Novel_001281"; | exon_number | "1"; | gene_type | " |
| At_chr8 | Cufflinks | exon | 33582240 | 33582461 | . | + | . | gene_id | "XLOC_095590"; | transcript_id | "Novel_001282"; | exon_number | "1"; | gene_type | " |
| At_chr8 | Cufflinks | exon | 33582629 | 33582690 | . | + | . | gene_id | "XLOC_095590"; | transcript_id | "Novel_001282"; | exon_number | "2"; | gene_type | " |
| At_chr8 | Cufflinks | exon | 33584911 | 33586468 | . | + | . | gene_id | "XLOC_095590"; | transcript_id | "Novel_001282"; | exon_number | "3"; | gene_type | " |
| At_chr8 | Cufflinks | exon | 33582260 | 33582461 | . | + | . | gene_id | "XLOC_095590"; | transcript_id | "Novel_001283"; | exon_number | "1"; | gene_type | " |
| At_chr8 | Cufflinks | exon | 33582629 | 33582690 | . | + | . | gene_id | "XLOC_095590"; | transcript_id | "Novel_001283"; | exon_number | "2"; | gene_type | " |
| At_chr8 | Cufflinks | exon | 33584911 | 33584970 | . | + | . | gene_id | "XLOC_095590"; | transcript_id | "Novel_001283"; | exon_number | "3"; | gene_type | " |
| At_chr8 | Cufflinks | exon | 33585248 | 33586475 | . | + | . | gene_id | "XLOC_095590"; | transcript_id | "Novel_001283"; | exon_number | "4"; | gene_type | " |
| At_chr8 | Cufflinks | exon | 33582527 | 33582690 | . | + | . | gene_id | "XLOC_095590"; | transcript_id | "Novel_001284"; | exon_number | "1"; | gene_type | " |
| At_chr8 | Cufflinks | exon | 33584911 | 33584970 | . | + | . | gene_id | "XLOC_095590"; | transcript_id | "Novel_001284"; | exon_number | "2"; | gene_type | " |
| At_chr8 | Cufflinks | exon | 33585248 | 33586425 | . | + | . | gene_id | "XLOC_095590"; | transcript_id | "Novel_001284"; | exon_number | "3"; | gene_type | " |
| At_chr8 | Cufflinks | exon | 38049687 | 38049907 | . | + | . | gene_id | "XLOC_095833"; | transcript_id | "Novel_001285"; | exon_number | "1"; | gene_type | " |
| At_chr8 | Cufflinks | exon | 38050438 | 38050557 | . | + | . | gene_id | "XLOC_095833"; | transcript_id | "Novel_001285"; | exon_number | "2"; | gene_type | " |
| At_chr8 | Cufflinks | exon | 38051796 | 38051861 | . | + | . | gene_id | "XLOC_095833"; | transcript_id | "Novel_001285"; | exon_number | "3"; | gene_type | " |
| At_chr8 | Cufflinks | exon | 38052011 | 38052555 | . | + | . | gene_id | "XLOC_095833"; | transcript_id | "Novel_001285"; | exon_number | "4"; | gene_type | " |
| At_chr8 | Cufflinks | exon | 40137487 | 40140013 | . | + | . | gene_id | "XLOC_096045"; | transcript_id | "Novel_001286"; | exon_number | "1"; | gene_type | " |
| At_chr8 | Cufflinks | exon | 40140532 | 40141131 | . | + | . | gene_id | "XLOC_096045"; | transcript_id | "Novel_001286"; | exon_number | "2"; | gene_type | " |
| At_chr8 | Cufflinks | exon | 40137631 | 40137656 | . | + | . | gene_id | "XLOC_096045"; | transcript_id | "Novel_001287"; | exon_number | "1"; | gene_type | " |
| At_chr8 | Cufflinks | exon | 40137797 | 40137972 | . | + | . | gene_id | "XLOC_096045"; | transcript_id | "Novel_001287"; | exon_number | "2"; | gene_type | " |
| At_chr8 | Cufflinks | exon | 40139817 | 40140013 | . | + | . | gene_id | "XLOC_096045"; | transcript_id | "Novel_001287"; | exon_number | "3"; | gene_type | " |
| At_chr8 | Cufflinks | exon | 40140532 | 40141242 | . | + | . | gene_id | "XLOC_096045"; | transcript_id | "Novel_001287"; | exon_number | "4"; | gene_type | " |
| At_chr8 | Cufflinks | exon | 40137686 | 40137972 | . | + | . | gene_id | "XLOC_096045"; | transcript_id | "Novel_001288"; | exon_number | "1"; | gene_type | " |
| At_chr8 | Cufflinks | exon | 40139817 | 40140013 | . | + | . | gene_id | "XLOC_096045"; | transcript_id | "Novel_001288"; | exon_number | "2"; | gene_type | " |
| At_chr8 | Cufflinks | exon | 40140532 | 40141229 | . | + | . | gene_id | "XLOC_096045"; | transcript_id | "Novel_001288"; | exon_number | "3"; | gene_type | " |
| At_chr8 | Cufflinks | exon | 41141033 | 41141349 | . | + | . | gene_id | "XLOC_096122"; | transcript_id | "Novel_001289"; | exon_number | "1"; | gene_type | " |
| At_chr8 | Cufflinks | exon | 41142755 | 41143729 | . | + | . | gene_id | "XLOC_096122"; | transcript_id | "Novel_001289"; | exon_number | "2"; | gene_type | " |
| At_chr8 | Cufflinks | exon | 43152441 | 43152665 | . | + | . | gene_id | "XLOC_096393"; | transcript_id | "Novel_001290"; | exon_number | "1"; | gene_type | " |
| At_chr8 | Cufflinks | exon | 43152853 | 43153343 | . | + | . | gene_id | "XLOC_096393"; | transcript_id | "Novel_001290"; | exon_number | "2"; | gene_type | " |
| At_chr8 | Cufflinks | exon | 43153426 | 43153787 | . | + | . | gene_id | "XLOC_096393"; | transcript_id | "Novel_001290"; | exon_number | "3"; | gene_type | " |
| At_chr8 | Cufflinks | exon | 43153885 | 43157116 | . | + | . | gene_id | "XLOC_096393"; | transcript_id | "Novel_001290"; | exon_number | "4"; | gene_type | " |
| At_chr8 | Cufflinks | exon | 43960103 | 43960973 | . | + | . | gene_id | "XLOC_096535"; | transcript_id | "Novel_001291"; | exon_number | "1"; | gene_type | " |

|         |           |      |          |          |   |   |   |         |                |               |                 |             |       |           |   |
|---------|-----------|------|----------|----------|---|---|---|---------|----------------|---------------|-----------------|-------------|-------|-----------|---|
| At_chr8 | Cufflinks | exon | 43961065 | 43961662 | . | + | . | gene_id | "XLOC_096535"; | transcript_id | "Novel_001291"; | exon_number | "2";  | gene_type | " |
| At_chr8 | Cufflinks | exon | 43990644 | 43990879 | . | + | . | gene_id | "XLOC_096548"; | transcript_id | "Novel_001292"; | exon_number | "1";  | gene_type | " |
| At_chr8 | Cufflinks | exon | 43991775 | 43993172 | . | + | . | gene_id | "XLOC_096548"; | transcript_id | "Novel_001292"; | exon_number | "2";  | gene_type | " |
| At_chr8 | Cufflinks | exon | 44005861 | 44005995 | . | + | . | gene_id | "XLOC_096556"; | transcript_id | "Novel_001293"; | exon_number | "1";  | gene_type | " |
| At_chr8 | Cufflinks | exon | 44006310 | 44007854 | . | + | . | gene_id | "XLOC_096556"; | transcript_id | "Novel_001293"; | exon_number | "2";  | gene_type | " |
| At_chr8 | Cufflinks | exon | 44023609 | 44024319 | . | + | . | gene_id | "XLOC_096562"; | transcript_id | "Novel_001294"; | exon_number | "1";  | gene_type | " |
| At_chr8 | Cufflinks | exon | 44024405 | 44025169 | . | + | . | gene_id | "XLOC_096562"; | transcript_id | "Novel_001294"; | exon_number | "2";  | gene_type | " |
| At_chr8 | Cufflinks | exon | 45885008 | 45885181 | . | + | . | gene_id | "XLOC_096822"; | transcript_id | "Novel_001295"; | exon_number | "1";  | gene_type | " |
| At_chr8 | Cufflinks | exon | 45885299 | 45885501 | . | + | . | gene_id | "XLOC_096822"; | transcript_id | "Novel_001295"; | exon_number | "2";  | gene_type | " |
| At_chr8 | Cufflinks | exon | 45885600 | 45885698 | . | + | . | gene_id | "XLOC_096822"; | transcript_id | "Novel_001295"; | exon_number | "3";  | gene_type | " |
| At_chr8 | Cufflinks | exon | 45885780 | 45886051 | . | + | . | gene_id | "XLOC_096822"; | transcript_id | "Novel_001295"; | exon_number | "4";  | gene_type | " |
| At_chr8 | Cufflinks | exon | 45886163 | 45886256 | . | + | . | gene_id | "XLOC_096822"; | transcript_id | "Novel_001295"; | exon_number | "5";  | gene_type | " |
| At_chr8 | Cufflinks | exon | 45886443 | 45886540 | . | + | . | gene_id | "XLOC_096822"; | transcript_id | "Novel_001295"; | exon_number | "6";  | gene_type | " |
| At_chr8 | Cufflinks | exon | 45886711 | 45886805 | . | + | . | gene_id | "XLOC_096822"; | transcript_id | "Novel_001295"; | exon_number | "7";  | gene_type | " |
| At_chr8 | Cufflinks | exon | 45886931 | 45887044 | . | + | . | gene_id | "XLOC_096822"; | transcript_id | "Novel_001295"; | exon_number | "8";  | gene_type | " |
| At_chr8 | Cufflinks | exon | 45887192 | 45887266 | . | + | . | gene_id | "XLOC_096822"; | transcript_id | "Novel_001295"; | exon_number | "9";  | gene_type | " |
| At_chr8 | Cufflinks | exon | 45887435 | 45888500 | . | + | . | gene_id | "XLOC_096822"; | transcript_id | "Novel_001295"; | exon_number | "10"; | gene_type | " |
| At_chr8 | Cufflinks | exon | 45886000 | 45886051 | . | + | . | gene_id | "XLOC_096822"; | transcript_id | "Novel_001296"; | exon_number | "1";  | gene_type | " |
| At_chr8 | Cufflinks | exon | 45886163 | 45886256 | . | + | . | gene_id | "XLOC_096822"; | transcript_id | "Novel_001296"; | exon_number | "2";  | gene_type | " |
| At_chr8 | Cufflinks | exon | 45886443 | 45886540 | . | + | . | gene_id | "XLOC_096822"; | transcript_id | "Novel_001296"; | exon_number | "3";  | gene_type | " |
| At_chr8 | Cufflinks | exon | 45886704 | 45886805 | . | + | . | gene_id | "XLOC_096822"; | transcript_id | "Novel_001296"; | exon_number | "4";  | gene_type | " |
| At_chr8 | Cufflinks | exon | 45886931 | 45887044 | . | + | . | gene_id | "XLOC_096822"; | transcript_id | "Novel_001296"; | exon_number | "5";  | gene_type | " |
| At_chr8 | Cufflinks | exon | 45887192 | 45888490 | . | + | . | gene_id | "XLOC_096822"; | transcript_id | "Novel_001296"; | exon_number | "6";  | gene_type | " |
| At_chr8 | Cufflinks | exon | 45952372 | 45953070 | . | + | . | gene_id | "XLOC_096828"; | transcript_id | "Novel_001297"; | exon_number | "1";  | gene_type | " |
| At_chr8 | Cufflinks | exon | 46424453 | 46424620 | . | + | . | gene_id | "XLOC_096851"; | transcript_id | "Novel_001298"; | exon_number | "1";  | gene_type | " |
| At_chr8 | Cufflinks | exon | 46424709 | 46424784 | . | + | . | gene_id | "XLOC_096851"; | transcript_id | "Novel_001298"; | exon_number | "2";  | gene_type | " |
| At_chr8 | Cufflinks | exon | 46430178 | 46430187 | . | + | . | gene_id | "XLOC_096851"; | transcript_id | "Novel_001298"; | exon_number | "3";  | gene_type | " |
| At_chr8 | Cufflinks | exon | 46479197 | 46479414 | . | + | . | gene_id | "XLOC_096866"; | transcript_id | "Novel_001299"; | exon_number | "1";  | gene_type | " |
| At_chr8 | Cufflinks | exon | 46479967 | 46480016 | . | + | . | gene_id | "XLOC_096866"; | transcript_id | "Novel_001299"; | exon_number | "2";  | gene_type | " |
| At_chr8 | Cufflinks | exon | 46482210 | 46482462 | . | + | . | gene_id | "XLOC_096867"; | transcript_id | "Novel_001300"; | exon_number | "1";  | gene_type | " |
| At_chr8 | Cufflinks | exon | 46483079 | 46483919 | . | + | . | gene_id | "XLOC_096867"; | transcript_id | "Novel_001300"; | exon_number | "2";  | gene_type | " |
| At_chr8 | Cufflinks | exon | 46511760 | 46511861 | . | + | . | gene_id | "XLOC_096869"; | transcript_id | "Novel_001301"; | exon_number | "1";  | gene_type | " |
| At_chr8 | Cufflinks | exon | 46512031 | 46512149 | . | + | . | gene_id | "XLOC_096869"; | transcript_id | "Novel_001301"; | exon_number | "2";  | gene_type | " |
| At_chr8 | Cufflinks | exon | 46512357 | 46512536 | . | + | . | gene_id | "XLOC_096869"; | transcript_id | "Novel_001301"; | exon_number | "3";  | gene_type | " |
| At_chr8 | Cufflinks | exon | 46513065 | 46513136 | . | + | . | gene_id | "XLOC_096869"; | transcript_id | "Novel_001301"; | exon_number | "4";  | gene_type | " |





|         |           |      |          |          |   |   |   |         |                |               |                 |             |      |           |   |
|---------|-----------|------|----------|----------|---|---|---|---------|----------------|---------------|-----------------|-------------|------|-----------|---|
| At_chr8 | Cufflinks | exon | 47786330 | 47787266 | . | + | . | gene_id | "XLOC_096929"; | transcript_id | "Novel_001309"; | exon_number | "3"; | gene_type | " |
| At_chr8 | Cufflinks | exon | 49833688 | 49833831 | . | + | . | gene_id | "XLOC_097017"; | transcript_id | "Novel_001310"; | exon_number | "1"; | gene_type | " |
| At_chr8 | Cufflinks | exon | 49834260 | 49835180 | . | + | . | gene_id | "XLOC_097017"; | transcript_id | "Novel_001310"; | exon_number | "2"; | gene_type | " |
| At_chr8 | Cufflinks | exon | 49874847 | 49875239 | . | + | . | gene_id | "XLOC_097020"; | transcript_id | "Novel_001311"; | exon_number | "1"; | gene_type | " |
| At_chr8 | Cufflinks | exon | 49875510 | 49875624 | . | + | . | gene_id | "XLOC_097020"; | transcript_id | "Novel_001311"; | exon_number | "2"; | gene_type | " |
| At_chr8 | Cufflinks | exon | 49876335 | 49876808 | . | + | . | gene_id | "XLOC_097020"; | transcript_id | "Novel_001311"; | exon_number | "3"; | gene_type | " |
| At_chr8 | Cufflinks | exon | 49879181 | 49879685 | . | + | . | gene_id | "XLOC_097020"; | transcript_id | "Novel_001311"; | exon_number | "4"; | gene_type | " |
| At_chr8 | Cufflinks | exon | 49879855 | 49879895 | . | + | . | gene_id | "XLOC_097020"; | transcript_id | "Novel_001311"; | exon_number | "5"; | gene_type | " |
| At_chr8 | Cufflinks | exon | 49880069 | 49880453 | . | + | . | gene_id | "XLOC_097020"; | transcript_id | "Novel_001311"; | exon_number | "6"; | gene_type | " |
| At_chr8 | Cufflinks | exon | 49875149 | 49875239 | . | + | . | gene_id | "XLOC_097020"; | transcript_id | "Novel_001312"; | exon_number | "1"; | gene_type | " |
| At_chr8 | Cufflinks | exon | 49877584 | 49877698 | . | + | . | gene_id | "XLOC_097020"; | transcript_id | "Novel_001312"; | exon_number | "2"; | gene_type | " |
| At_chr8 | Cufflinks | exon | 49878404 | 49878877 | . | + | . | gene_id | "XLOC_097020"; | transcript_id | "Novel_001312"; | exon_number | "3"; | gene_type | " |
| At_chr8 | Cufflinks | exon | 49879181 | 49879685 | . | + | . | gene_id | "XLOC_097020"; | transcript_id | "Novel_001312"; | exon_number | "4"; | gene_type | " |
| At_chr8 | Cufflinks | exon | 49879855 | 49879895 | . | + | . | gene_id | "XLOC_097020"; | transcript_id | "Novel_001312"; | exon_number | "5"; | gene_type | " |
| At_chr8 | Cufflinks | exon | 49880069 | 49880446 | . | + | . | gene_id | "XLOC_097020"; | transcript_id | "Novel_001312"; | exon_number | "6"; | gene_type | " |
| At_chr8 | Cufflinks | exon | 52064535 | 52064806 | . | + | . | gene_id | "XLOC_097081"; | transcript_id | "Novel_001313"; | exon_number | "1"; | gene_type | " |
| At_chr8 | Cufflinks | exon | 52065650 | 52065760 | . | + | . | gene_id | "XLOC_097081"; | transcript_id | "Novel_001313"; | exon_number | "2"; | gene_type | " |
| At_chr8 | Cufflinks | exon | 52067107 | 52067925 | . | + | . | gene_id | "XLOC_097081"; | transcript_id | "Novel_001313"; | exon_number | "3"; | gene_type | " |
| At_chr8 | Cufflinks | exon | 53527603 | 53527819 | . | + | . | gene_id | "XLOC_097111"; | transcript_id | "Novel_001314"; | exon_number | "1"; | gene_type | " |
| At_chr8 | Cufflinks | exon | 53527895 | 53527995 | . | + | . | gene_id | "XLOC_097111"; | transcript_id | "Novel_001314"; | exon_number | "2"; | gene_type | " |
| At_chr8 | Cufflinks | exon | 53528097 | 53528214 | . | + | . | gene_id | "XLOC_097111"; | transcript_id | "Novel_001314"; | exon_number | "3"; | gene_type | " |
| At_chr8 | Cufflinks | exon | 53528657 | 53528709 | . | + | . | gene_id | "XLOC_097111"; | transcript_id | "Novel_001314"; | exon_number | "4"; | gene_type | " |
| At_chr8 | Cufflinks | exon | 53528992 | 53529015 | . | + | . | gene_id | "XLOC_097111"; | transcript_id | "Novel_001314"; | exon_number | "5"; | gene_type | " |
| At_chr8 | Cufflinks | exon | 53529118 | 53529462 | . | + | . | gene_id | "XLOC_097111"; | transcript_id | "Novel_001314"; | exon_number | "6"; | gene_type | " |
| At_chr8 | Cufflinks | exon | 53529569 | 53529887 | . | + | . | gene_id | "XLOC_097111"; | transcript_id | "Novel_001314"; | exon_number | "7"; | gene_type | " |
| At_chr8 | Cufflinks | exon | 53531140 | 53531267 | . | + | . | gene_id | "XLOC_097111"; | transcript_id | "Novel_001314"; | exon_number | "8"; | gene_type | " |
| At_chr8 | Cufflinks | exon | 53531854 | 53532295 | . | + | . | gene_id | "XLOC_097111"; | transcript_id | "Novel_001314"; | exon_number | "9"; | gene_type | " |
| At_chr8 | Cufflinks | exon | 53527610 | 53527995 | . | + | . | gene_id | "XLOC_097111"; | transcript_id | "Novel_001315"; | exon_number | "1"; | gene_type | " |
| At_chr8 | Cufflinks | exon | 53528097 | 53528709 | . | + | . | gene_id | "XLOC_097111"; | transcript_id | "Novel_001315"; | exon_number | "2"; | gene_type | " |
| At_chr8 | Cufflinks | exon | 53528992 | 53529903 | . | + | . | gene_id | "XLOC_097111"; | transcript_id | "Novel_001315"; | exon_number | "3"; | gene_type | " |
| At_chr8 | Cufflinks | exon | 53527614 | 53527819 | . | + | . | gene_id | "XLOC_097111"; | transcript_id | "Novel_001316"; | exon_number | "1"; | gene_type | " |
| At_chr8 | Cufflinks | exon | 53527895 | 53527995 | . | + | . | gene_id | "XLOC_097111"; | transcript_id | "Novel_001316"; | exon_number | "2"; | gene_type | " |
| At_chr8 | Cufflinks | exon | 53528097 | 53528214 | . | + | . | gene_id | "XLOC_097111"; | transcript_id | "Novel_001316"; | exon_number | "3"; | gene_type | " |
| At_chr8 | Cufflinks | exon | 53528657 | 53528709 | . | + | . | gene_id | "XLOC_097111"; | transcript_id | "Novel_001316"; | exon_number | "4"; | gene_type | " |
| At_chr8 | Cufflinks | exon | 53528992 | 53529015 | . | + | . | gene_id | "XLOC_097111"; | transcript_id | "Novel_001316"; | exon_number | "5"; | gene_type | " |

|         |           |      |          |          |   |   |   |         |                |               |                 |             |      |           |   |
|---------|-----------|------|----------|----------|---|---|---|---------|----------------|---------------|-----------------|-------------|------|-----------|---|
| At_chr8 | Cufflinks | exon | 53529118 | 53529462 | . | + | . | gene_id | "XLOC_097111"; | transcript_id | "Novel_001316"; | exon_number | "6"; | gene_type | " |
| At_chr8 | Cufflinks | exon | 53529569 | 53529887 | . | + | . | gene_id | "XLOC_097111"; | transcript_id | "Novel_001316"; | exon_number | "7"; | gene_type | " |
| At_chr8 | Cufflinks | exon | 53531140 | 53532440 | . | + | . | gene_id | "XLOC_097111"; | transcript_id | "Novel_001316"; | exon_number | "8"; | gene_type | " |
| At_chr8 | Cufflinks | exon | 57109509 | 57110831 | . | + | . | gene_id | "XLOC_097230"; | transcript_id | "Novel_001317"; | exon_number | "1"; | gene_type | " |
| At_chr8 | Cufflinks | exon | 57114446 | 57114814 | . | + | . | gene_id | "XLOC_097230"; | transcript_id | "Novel_001317"; | exon_number | "2"; | gene_type | " |
| At_chr8 | Cufflinks | exon | 57109509 | 57109826 | . | + | . | gene_id | "XLOC_097230"; | transcript_id | "Novel_001318"; | exon_number | "1"; | gene_type | " |
| At_chr8 | Cufflinks | exon | 57110116 | 57110831 | . | + | . | gene_id | "XLOC_097230"; | transcript_id | "Novel_001318"; | exon_number | "2"; | gene_type | " |
| At_chr8 | Cufflinks | exon | 57114446 | 57114814 | . | + | . | gene_id | "XLOC_097230"; | transcript_id | "Novel_001318"; | exon_number | "3"; | gene_type | " |
| At_chr8 | Cufflinks | exon | 57109551 | 57109826 | . | + | . | gene_id | "XLOC_097230"; | transcript_id | "Novel_001319"; | exon_number | "1"; | gene_type | " |
| At_chr8 | Cufflinks | exon | 57110586 | 57110831 | . | + | . | gene_id | "XLOC_097230"; | transcript_id | "Novel_001319"; | exon_number | "2"; | gene_type | " |
| At_chr8 | Cufflinks | exon | 57114446 | 57114983 | . | + | . | gene_id | "XLOC_097230"; | transcript_id | "Novel_001319"; | exon_number | "3"; | gene_type | " |
| At_chr8 | Cufflinks | exon | 60179539 | 60180153 | . | + | . | gene_id | "XLOC_097417"; | transcript_id | "Novel_001320"; | exon_number | "1"; | gene_type | " |
| At_chr8 | Cufflinks | exon | 60180499 | 60181095 | . | + | . | gene_id | "XLOC_097417"; | transcript_id | "Novel_001320"; | exon_number | "2"; | gene_type | " |
| At_chr8 | Cufflinks | exon | 60181411 | 60182131 | . | + | . | gene_id | "XLOC_097418"; | transcript_id | "Novel_001321"; | exon_number | "1"; | gene_type | " |
| At_chr8 | Cufflinks | exon | 60182986 | 60183747 | . | + | . | gene_id | "XLOC_097418"; | transcript_id | "Novel_001321"; | exon_number | "2"; | gene_type | " |
| At_chr8 | Cufflinks | exon | 68337352 | 68337425 | . | + | . | gene_id | "XLOC_097682"; | transcript_id | "Novel_001322"; | exon_number | "1"; | gene_type | " |
| At_chr8 | Cufflinks | exon | 68337733 | 68337842 | . | + | . | gene_id | "XLOC_097682"; | transcript_id | "Novel_001322"; | exon_number | "2"; | gene_type | " |
| At_chr8 | Cufflinks | exon | 68338856 | 68338921 | . | + | . | gene_id | "XLOC_097682"; | transcript_id | "Novel_001322"; | exon_number | "3"; | gene_type | " |
| At_chr8 | Cufflinks | exon | 68339071 | 68339512 | . | + | . | gene_id | "XLOC_097682"; | transcript_id | "Novel_001322"; | exon_number | "4"; | gene_type | " |
| At_chr8 | Cufflinks | exon | 68337362 | 68337425 | . | + | . | gene_id | "XLOC_097682"; | transcript_id | "Novel_001323"; | exon_number | "1"; | gene_type | " |
| At_chr8 | Cufflinks | exon | 68337584 | 68337651 | . | + | . | gene_id | "XLOC_097682"; | transcript_id | "Novel_001323"; | exon_number | "2"; | gene_type | " |
| At_chr8 | Cufflinks | exon | 68337733 | 68337842 | . | + | . | gene_id | "XLOC_097682"; | transcript_id | "Novel_001323"; | exon_number | "3"; | gene_type | " |
| At_chr8 | Cufflinks | exon | 68338856 | 68338921 | . | + | . | gene_id | "XLOC_097682"; | transcript_id | "Novel_001323"; | exon_number | "4"; | gene_type | " |
| At_chr8 | Cufflinks | exon | 68339071 | 68339512 | . | + | . | gene_id | "XLOC_097682"; | transcript_id | "Novel_001323"; | exon_number | "5"; | gene_type | " |
| At_chr8 | Cufflinks | exon | 68337473 | 68337842 | . | + | . | gene_id | "XLOC_097682"; | transcript_id | "Novel_001324"; | exon_number | "1"; | gene_type | " |
| At_chr8 | Cufflinks | exon | 68338856 | 68338921 | . | + | . | gene_id | "XLOC_097682"; | transcript_id | "Novel_001324"; | exon_number | "2"; | gene_type | " |
| At_chr8 | Cufflinks | exon | 68339071 | 68339513 | . | + | . | gene_id | "XLOC_097682"; | transcript_id | "Novel_001324"; | exon_number | "3"; | gene_type | " |
| At_chr8 | Cufflinks | exon | 68337473 | 68337651 | . | + | . | gene_id | "XLOC_097682"; | transcript_id | "Novel_001325"; | exon_number | "1"; | gene_type | " |
| At_chr8 | Cufflinks | exon | 68337733 | 68337842 | . | + | . | gene_id | "XLOC_097682"; | transcript_id | "Novel_001325"; | exon_number | "2"; | gene_type | " |
| At_chr8 | Cufflinks | exon | 68338856 | 68338921 | . | + | . | gene_id | "XLOC_097682"; | transcript_id | "Novel_001325"; | exon_number | "3"; | gene_type | " |
| At_chr8 | Cufflinks | exon | 68339071 | 68339513 | . | + | . | gene_id | "XLOC_097682"; | transcript_id | "Novel_001325"; | exon_number | "4"; | gene_type | " |
| At_chr8 | Cufflinks | exon | 72214895 | 72215093 | . | + | . | gene_id | "XLOC_097837"; | transcript_id | "Novel_001326"; | exon_number | "1"; | gene_type | " |
| At_chr8 | Cufflinks | exon | 72215181 | 72215255 | . | + | . | gene_id | "XLOC_097837"; | transcript_id | "Novel_001326"; | exon_number | "2"; | gene_type | " |
| At_chr8 | Cufflinks | exon | 72215406 | 72215743 | . | + | . | gene_id | "XLOC_097837"; | transcript_id | "Novel_001326"; | exon_number | "3"; | gene_type | " |
| At_chr8 | Cufflinks | exon | 73093622 | 73093998 | . | + | . | gene_id | "XLOC_097880"; | transcript_id | "Novel_001327"; | exon_number | "1"; | gene_type | " |



|         |           |      |          |          |   |   |         |                |               |                 |             |      |           |   |
|---------|-----------|------|----------|----------|---|---|---------|----------------|---------------|-----------------|-------------|------|-----------|---|
| At_chr8 | Cufflinks | exon | 2419029  | 2419993  | . | . | gene_id | "XLOC_098583"; | transcript_id | "Novel_001333"; | exon_number | "1"; | gene_type | " |
| At_chr8 | Cufflinks | exon | 2420353  | 2420861  | . | . | gene_id | "XLOC_098583"; | transcript_id | "Novel_001333"; | exon_number | "2"; | gene_type | " |
| At_chr8 | Cufflinks | exon | 2421417  | 2421518  | . | . | gene_id | "XLOC_098583"; | transcript_id | "Novel_001333"; | exon_number | "3"; | gene_type | " |
| At_chr8 | Cufflinks | exon | 2551599  | 2551717  | . | . | gene_id | "XLOC_098589"; | transcript_id | "Novel_001334"; | exon_number | "1"; | gene_type | " |
| At_chr8 | Cufflinks | exon | 2552442  | 2552562  | . | . | gene_id | "XLOC_098589"; | transcript_id | "Novel_001334"; | exon_number | "2"; | gene_type | " |
| At_chr8 | Cufflinks | exon | 2552634  | 2552711  | . | . | gene_id | "XLOC_098589"; | transcript_id | "Novel_001334"; | exon_number | "3"; | gene_type | " |
| At_chr8 | Cufflinks | exon | 2553013  | 2553099  | . | . | gene_id | "XLOC_098589"; | transcript_id | "Novel_001334"; | exon_number | "4"; | gene_type | " |
| At_chr8 | Cufflinks | exon | 2551600  | 2551717  | . | . | gene_id | "XLOC_098589"; | transcript_id | "Novel_001335"; | exon_number | "1"; | gene_type | " |
| At_chr8 | Cufflinks | exon | 2552442  | 2552562  | . | . | gene_id | "XLOC_098589"; | transcript_id | "Novel_001335"; | exon_number | "2"; | gene_type | " |
| At_chr8 | Cufflinks | exon | 2552634  | 2552974  | . | . | gene_id | "XLOC_098589"; | transcript_id | "Novel_001335"; | exon_number | "3"; | gene_type | " |
| At_chr8 | Cufflinks | exon | 2551864  | 2552562  | . | . | gene_id | "XLOC_098589"; | transcript_id | "Novel_001336"; | exon_number | "1"; | gene_type | " |
| At_chr8 | Cufflinks | exon | 2552634  | 2552711  | . | . | gene_id | "XLOC_098589"; | transcript_id | "Novel_001336"; | exon_number | "2"; | gene_type | " |
| At_chr8 | Cufflinks | exon | 2552838  | 2552959  | . | . | gene_id | "XLOC_098589"; | transcript_id | "Novel_001336"; | exon_number | "3"; | gene_type | " |
| At_chr8 | Cufflinks | exon | 3975763  | 3977541  | . | . | gene_id | "XLOC_098695"; | transcript_id | "Novel_001337"; | exon_number | "1"; | gene_type | " |
| At_chr8 | Cufflinks | exon | 3977627  | 3977868  | . | . | gene_id | "XLOC_098695"; | transcript_id | "Novel_001337"; | exon_number | "2"; | gene_type | " |
| At_chr8 | Cufflinks | exon | 4424564  | 4425168  | . | . | gene_id | "XLOC_098709"; | transcript_id | "Novel_001338"; | exon_number | "1"; | gene_type | " |
| At_chr8 | Cufflinks | exon | 4425371  | 4426091  | . | . | gene_id | "XLOC_098709"; | transcript_id | "Novel_001338"; | exon_number | "2"; | gene_type | " |
| At_chr8 | Cufflinks | exon | 4426229  | 4426341  | . | . | gene_id | "XLOC_098709"; | transcript_id | "Novel_001338"; | exon_number | "3"; | gene_type | " |
| At_chr8 | Cufflinks | exon | 4426427  | 4426931  | . | . | gene_id | "XLOC_098709"; | transcript_id | "Novel_001338"; | exon_number | "4"; | gene_type | " |
| At_chr8 | Cufflinks | exon | 4424580  | 4425168  | . | . | gene_id | "XLOC_098709"; | transcript_id | "Novel_001339"; | exon_number | "1"; | gene_type | " |
| At_chr8 | Cufflinks | exon | 4425371  | 4426091  | . | . | gene_id | "XLOC_098709"; | transcript_id | "Novel_001339"; | exon_number | "2"; | gene_type | " |
| At_chr8 | Cufflinks | exon | 4426229  | 4426910  | . | . | gene_id | "XLOC_098709"; | transcript_id | "Novel_001339"; | exon_number | "3"; | gene_type | " |
| At_chr8 | Cufflinks | exon | 13294120 | 13296200 | . | . | gene_id | "XLOC_099065"; | transcript_id | "Novel_001340"; | exon_number | "1"; | gene_type | " |
| At_chr8 | Cufflinks | exon | 13296289 | 13296387 | . | . | gene_id | "XLOC_099065"; | transcript_id | "Novel_001340"; | exon_number | "2"; | gene_type | " |
| At_chr8 | Cufflinks | exon | 13296468 | 13296603 | . | . | gene_id | "XLOC_099065"; | transcript_id | "Novel_001340"; | exon_number | "3"; | gene_type | " |
| At_chr8 | Cufflinks | exon | 13296676 | 13296822 | . | . | gene_id | "XLOC_099065"; | transcript_id | "Novel_001340"; | exon_number | "4"; | gene_type | " |
| At_chr8 | Cufflinks | exon | 13296917 | 13297054 | . | . | gene_id | "XLOC_099065"; | transcript_id | "Novel_001340"; | exon_number | "5"; | gene_type | " |
| At_chr8 | Cufflinks | exon | 13295861 | 13296200 | . | . | gene_id | "XLOC_099065"; | transcript_id | "Novel_001341"; | exon_number | "1"; | gene_type | " |
| At_chr8 | Cufflinks | exon | 13296289 | 13296387 | . | . | gene_id | "XLOC_099065"; | transcript_id | "Novel_001341"; | exon_number | "2"; | gene_type | " |
| At_chr8 | Cufflinks | exon | 13296468 | 13296822 | . | . | gene_id | "XLOC_099065"; | transcript_id | "Novel_001341"; | exon_number | "3"; | gene_type | " |
| At_chr8 | Cufflinks | exon | 13296917 | 13297078 | . | . | gene_id | "XLOC_099065"; | transcript_id | "Novel_001341"; | exon_number | "4"; | gene_type | " |
| At_chr8 | Cufflinks | exon | 15617614 | 15618015 | . | . | gene_id | "XLOC_099131"; | transcript_id | "Novel_001342"; | exon_number | "1"; | gene_type | " |
| At_chr8 | Cufflinks | exon | 15619361 | 15619427 | . | . | gene_id | "XLOC_099131"; | transcript_id | "Novel_001342"; | exon_number | "2"; | gene_type | " |
| At_chr8 | Cufflinks | exon | 15619832 | 15620089 | . | . | gene_id | "XLOC_099131"; | transcript_id | "Novel_001342"; | exon_number | "3"; | gene_type | " |
| At_chr8 | Cufflinks | exon | 15617614 | 15618018 | . | . | gene_id | "XLOC_099131"; | transcript_id | "Novel_001343"; | exon_number | "1"; | gene_type | " |

|         |           |      |          |          |   |   |   |         |                |               |                 |             |       |           |   |
|---------|-----------|------|----------|----------|---|---|---|---------|----------------|---------------|-----------------|-------------|-------|-----------|---|
| At_chr8 | Cufflinks | exon | 15619361 | 15619427 | . | - | . | gene_id | "XLOC_099131"; | transcript_id | "Novel_001343"; | exon_number | "2";  | gene_type | " |
| At_chr8 | Cufflinks | exon | 15619832 | 15620089 | . | - | . | gene_id | "XLOC_099131"; | transcript_id | "Novel_001343"; | exon_number | "3";  | gene_type | " |
| At_chr8 | Cufflinks | exon | 15776160 | 15776502 | . | - | . | gene_id | "XLOC_099146"; | transcript_id | "Novel_001344"; | exon_number | "1";  | gene_type | " |
| At_chr8 | Cufflinks | exon | 15777033 | 15777579 | . | - | . | gene_id | "XLOC_099146"; | transcript_id | "Novel_001344"; | exon_number | "2";  | gene_type | " |
| At_chr8 | Cufflinks | exon | 22981816 | 22982070 | . | - | . | gene_id | "XLOC_099409"; | transcript_id | "Novel_001345"; | exon_number | "1";  | gene_type | " |
| At_chr8 | Cufflinks | exon | 22982382 | 22982542 | . | - | . | gene_id | "XLOC_099409"; | transcript_id | "Novel_001345"; | exon_number | "2";  | gene_type | " |
| At_chr8 | Cufflinks | exon | 24855488 | 24856585 | . | - | . | gene_id | "XLOC_099468"; | transcript_id | "Novel_001346"; | exon_number | "1";  | gene_type | " |
| At_chr8 | Cufflinks | exon | 24856677 | 24856705 | . | - | . | gene_id | "XLOC_099468"; | transcript_id | "Novel_001346"; | exon_number | "2";  | gene_type | " |
| At_chr8 | Cufflinks | exon | 24856803 | 24856904 | . | - | . | gene_id | "XLOC_099468"; | transcript_id | "Novel_001346"; | exon_number | "3";  | gene_type | " |
| At_chr8 | Cufflinks | exon | 24857064 | 24857112 | . | - | . | gene_id | "XLOC_099468"; | transcript_id | "Novel_001346"; | exon_number | "4";  | gene_type | " |
| At_chr8 | Cufflinks | exon | 31660484 | 31660690 | . | - | . | gene_id | "XLOC_099665"; | transcript_id | "Novel_001347"; | exon_number | "1";  | gene_type | " |
| At_chr8 | Cufflinks | exon | 33852951 | 33853159 | . | - | . | gene_id | "XLOC_099766"; | transcript_id | "Novel_001348"; | exon_number | "1";  | gene_type | " |
| At_chr8 | Cufflinks | exon | 34767081 | 34768009 | . | - | . | gene_id | "XLOC_099814"; | transcript_id | "Novel_001349"; | exon_number | "1";  | gene_type | " |
| At_chr8 | Cufflinks | exon | 34768265 | 34768448 | . | - | . | gene_id | "XLOC_099814"; | transcript_id | "Novel_001349"; | exon_number | "2";  | gene_type | " |
| At_chr8 | Cufflinks | exon | 35305791 | 35308400 | . | - | . | gene_id | "XLOC_099853"; | transcript_id | "Novel_001350"; | exon_number | "1";  | gene_type | " |
| At_chr8 | Cufflinks | exon | 35308926 | 35309090 | . | - | . | gene_id | "XLOC_099853"; | transcript_id | "Novel_001350"; | exon_number | "2";  | gene_type | " |
| At_chr8 | Cufflinks | exon | 38087793 | 38088274 | . | - | . | gene_id | "XLOC_099982"; | transcript_id | "Novel_001351"; | exon_number | "1";  | gene_type | " |
| At_chr8 | Cufflinks | exon | 38089139 | 38089267 | . | - | . | gene_id | "XLOC_099982"; | transcript_id | "Novel_001351"; | exon_number | "2";  | gene_type | " |
| At_chr8 | Cufflinks | exon | 38089698 | 38090021 | . | - | . | gene_id | "XLOC_099982"; | transcript_id | "Novel_001351"; | exon_number | "3";  | gene_type | " |
| At_chr8 | Cufflinks | exon | 38087962 | 38088274 | . | - | . | gene_id | "XLOC_099982"; | transcript_id | "Novel_001352"; | exon_number | "1";  | gene_type | " |
| At_chr8 | Cufflinks | exon | 38089139 | 38090052 | . | - | . | gene_id | "XLOC_099982"; | transcript_id | "Novel_001352"; | exon_number | "2";  | gene_type | " |
| At_chr8 | Cufflinks | exon | 44797135 | 44798183 | . | - | . | gene_id | "XLOC_100810"; | transcript_id | "Novel_001353"; | exon_number | "1";  | gene_type | " |
| At_chr8 | Cufflinks | exon | 44798496 | 44798776 | . | - | . | gene_id | "XLOC_100810"; | transcript_id | "Novel_001353"; | exon_number | "2";  | gene_type | " |
| At_chr8 | Cufflinks | exon | 46514556 | 46515457 | . | - | . | gene_id | "XLOC_100929"; | transcript_id | "Novel_001354"; | exon_number | "1";  | gene_type | " |
| At_chr8 | Cufflinks | exon | 46515554 | 46515648 | . | - | . | gene_id | "XLOC_100929"; | transcript_id | "Novel_001354"; | exon_number | "2";  | gene_type | " |
| At_chr8 | Cufflinks | exon | 46515906 | 46516059 | . | - | . | gene_id | "XLOC_100929"; | transcript_id | "Novel_001354"; | exon_number | "3";  | gene_type | " |
| At_chr8 | Cufflinks | exon | 46516166 | 46516294 | . | - | . | gene_id | "XLOC_100929"; | transcript_id | "Novel_001354"; | exon_number | "4";  | gene_type | " |
| At_chr8 | Cufflinks | exon | 46516674 | 46516764 | . | - | . | gene_id | "XLOC_100929"; | transcript_id | "Novel_001354"; | exon_number | "5";  | gene_type | " |
| At_chr8 | Cufflinks | exon | 46517018 | 46517256 | . | - | . | gene_id | "XLOC_100929"; | transcript_id | "Novel_001354"; | exon_number | "6";  | gene_type | " |
| At_chr8 | Cufflinks | exon | 46517393 | 46517550 | . | - | . | gene_id | "XLOC_100929"; | transcript_id | "Novel_001354"; | exon_number | "7";  | gene_type | " |
| At_chr8 | Cufflinks | exon | 46517639 | 46517686 | . | - | . | gene_id | "XLOC_100929"; | transcript_id | "Novel_001354"; | exon_number | "8";  | gene_type | " |
| At_chr8 | Cufflinks | exon | 46517930 | 46517984 | . | - | . | gene_id | "XLOC_100929"; | transcript_id | "Novel_001354"; | exon_number | "9";  | gene_type | " |
| At_chr8 | Cufflinks | exon | 46518080 | 46518148 | . | - | . | gene_id | "XLOC_100929"; | transcript_id | "Novel_001354"; | exon_number | "10"; | gene_type | " |
| At_chr8 | Cufflinks | exon | 46518428 | 46518534 | . | - | . | gene_id | "XLOC_100929"; | transcript_id | "Novel_001354"; | exon_number | "11"; | gene_type | " |
| At_chr8 | Cufflinks | exon | 46518752 | 46518818 | . | - | . | gene_id | "XLOC_100929"; | transcript_id | "Novel_001354"; | exon_number | "12"; | gene_type | " |



|         |           |      |          |          |   |   |         |                |               |                 |             |      |           |   |
|---------|-----------|------|----------|----------|---|---|---------|----------------|---------------|-----------------|-------------|------|-----------|---|
| At_chr8 | Cufflinks | exon | 47768494 | 47768650 | . | . | gene_id | "XLOC_101032"; | transcript_id | "Novel_001358"; | exon_number | "2"; | gene_type | " |
| At_chr8 | Cufflinks | exon | 48102312 | 48102400 | . | . | gene_id | "XLOC_101043"; | transcript_id | "Novel_001359"; | exon_number | "1"; | gene_type | " |
| At_chr8 | Cufflinks | exon | 48102507 | 48102575 | . | . | gene_id | "XLOC_101043"; | transcript_id | "Novel_001359"; | exon_number | "2"; | gene_type | " |
| At_chr8 | Cufflinks | exon | 48102653 | 48102768 | . | . | gene_id | "XLOC_101043"; | transcript_id | "Novel_001359"; | exon_number | "3"; | gene_type | " |
| At_chr8 | Cufflinks | exon | 48103838 | 48103881 | . | . | gene_id | "XLOC_101044"; | transcript_id | "Novel_001360"; | exon_number | "1"; | gene_type | " |
| At_chr8 | Cufflinks | exon | 48103970 | 48104041 | . | . | gene_id | "XLOC_101044"; | transcript_id | "Novel_001360"; | exon_number | "2"; | gene_type | " |
| At_chr8 | Cufflinks | exon | 48104148 | 48104298 | . | . | gene_id | "XLOC_101044"; | transcript_id | "Novel_001360"; | exon_number | "3"; | gene_type | " |
| At_chr8 | Cufflinks | exon | 48104365 | 48104759 | . | . | gene_id | "XLOC_101044"; | transcript_id | "Novel_001360"; | exon_number | "4"; | gene_type | " |
| At_chr8 | Cufflinks | exon | 50067924 | 50068435 | . | . | gene_id | "XLOC_101153"; | transcript_id | "Novel_001361"; | exon_number | "1"; | gene_type | " |
| At_chr8 | Cufflinks | exon | 50068549 | 50068704 | . | . | gene_id | "XLOC_101153"; | transcript_id | "Novel_001361"; | exon_number | "2"; | gene_type | " |
| At_chr8 | Cufflinks | exon | 50068818 | 50068889 | . | . | gene_id | "XLOC_101153"; | transcript_id | "Novel_001361"; | exon_number | "3"; | gene_type | " |
| At_chr8 | Cufflinks | exon | 50069677 | 50069749 | . | . | gene_id | "XLOC_101153"; | transcript_id | "Novel_001361"; | exon_number | "4"; | gene_type | " |
| At_chr8 | Cufflinks | exon | 50070274 | 50070348 | . | . | gene_id | "XLOC_101153"; | transcript_id | "Novel_001361"; | exon_number | "5"; | gene_type | " |
| At_chr8 | Cufflinks | exon | 50070541 | 50070800 | . | . | gene_id | "XLOC_101153"; | transcript_id | "Novel_001361"; | exon_number | "6"; | gene_type | " |
| At_chr8 | Cufflinks | exon | 50068013 | 50068289 | . | . | gene_id | "XLOC_101153"; | transcript_id | "Novel_001362"; | exon_number | "1"; | gene_type | " |
| At_chr8 | Cufflinks | exon | 50068357 | 50068435 | . | . | gene_id | "XLOC_101153"; | transcript_id | "Novel_001362"; | exon_number | "2"; | gene_type | " |
| At_chr8 | Cufflinks | exon | 50068549 | 50068685 | . | . | gene_id | "XLOC_101153"; | transcript_id | "Novel_001362"; | exon_number | "3"; | gene_type | " |
| At_chr8 | Cufflinks | exon | 50068818 | 50068889 | . | . | gene_id | "XLOC_101153"; | transcript_id | "Novel_001362"; | exon_number | "4"; | gene_type | " |
| At_chr8 | Cufflinks | exon | 50069677 | 50069749 | . | . | gene_id | "XLOC_101153"; | transcript_id | "Novel_001362"; | exon_number | "5"; | gene_type | " |
| At_chr8 | Cufflinks | exon | 50070274 | 50070348 | . | . | gene_id | "XLOC_101153"; | transcript_id | "Novel_001362"; | exon_number | "6"; | gene_type | " |
| At_chr8 | Cufflinks | exon | 50070541 | 50070764 | . | . | gene_id | "XLOC_101153"; | transcript_id | "Novel_001362"; | exon_number | "7"; | gene_type | " |
| At_chr8 | Cufflinks | exon | 50068113 | 50068276 | . | . | gene_id | "XLOC_101153"; | transcript_id | "Novel_001363"; | exon_number | "1"; | gene_type | " |
| At_chr8 | Cufflinks | exon | 50068357 | 50068435 | . | . | gene_id | "XLOC_101153"; | transcript_id | "Novel_001363"; | exon_number | "2"; | gene_type | " |
| At_chr8 | Cufflinks | exon | 50068549 | 50069125 | . | . | gene_id | "XLOC_101153"; | transcript_id | "Novel_001363"; | exon_number | "3"; | gene_type | " |
| At_chr8 | Cufflinks | exon | 52932804 | 52933282 | . | . | gene_id | "XLOC_101233"; | transcript_id | "Novel_001364"; | exon_number | "1"; | gene_type | " |
| At_chr8 | Cufflinks | exon | 52933408 | 52933544 | . | . | gene_id | "XLOC_101233"; | transcript_id | "Novel_001364"; | exon_number | "2"; | gene_type | " |
| At_chr8 | Cufflinks | exon | 52934668 | 52934745 | . | . | gene_id | "XLOC_101233"; | transcript_id | "Novel_001364"; | exon_number | "3"; | gene_type | " |
| At_chr8 | Cufflinks | exon | 52932930 | 52933544 | . | . | gene_id | "XLOC_101233"; | transcript_id | "Novel_001365"; | exon_number | "1"; | gene_type | " |
| At_chr8 | Cufflinks | exon | 52934668 | 52934761 | . | . | gene_id | "XLOC_101233"; | transcript_id | "Novel_001365"; | exon_number | "2"; | gene_type | " |
| At_chr8 | Cufflinks | exon | 57461165 | 57461866 | . | . | gene_id | "XLOC_101384"; | transcript_id | "Novel_001366"; | exon_number | "1"; | gene_type | " |
| At_chr8 | Cufflinks | exon | 57462681 | 57462789 | . | . | gene_id | "XLOC_101384"; | transcript_id | "Novel_001366"; | exon_number | "2"; | gene_type | " |
| At_chr8 | Cufflinks | exon | 57536563 | 57538167 | . | . | gene_id | "XLOC_101397"; | transcript_id | "Novel_001367"; | exon_number | "1"; | gene_type | " |
| At_chr8 | Cufflinks | exon | 64513994 | 64514380 | . | . | gene_id | "XLOC_101583"; | transcript_id | "Novel_001368"; | exon_number | "1"; | gene_type | " |
| At_chr8 | Cufflinks | exon | 64514496 | 64514571 | . | . | gene_id | "XLOC_101583"; | transcript_id | "Novel_001368"; | exon_number | "2"; | gene_type | " |
| At_chr8 | Cufflinks | exon | 64514670 | 64514801 | . | . | gene_id | "XLOC_101583"; | transcript_id | "Novel_001368"; | exon_number | "3"; | gene_type | " |

|         |           |      |          |          |   |   |         |                |               |                 |             |      |           |   |
|---------|-----------|------|----------|----------|---|---|---------|----------------|---------------|-----------------|-------------|------|-----------|---|
| At_chr8 | Cufflinks | exon | 64515578 | 64515687 | . | . | gene_id | "XLOC_101583"; | transcript_id | "Novel_001368"; | exon_number | "4"; | gene_type | " |
| At_chr8 | Cufflinks | exon | 64515774 | 64515988 | . | . | gene_id | "XLOC_101583"; | transcript_id | "Novel_001368"; | exon_number | "5"; | gene_type | " |
| At_chr8 | Cufflinks | exon | 64516100 | 64516140 | . | . | gene_id | "XLOC_101583"; | transcript_id | "Novel_001368"; | exon_number | "6"; | gene_type | " |
| At_chr8 | Cufflinks | exon | 66033350 | 66033362 | . | . | gene_id | "XLOC_101635"; | transcript_id | "Novel_001369"; | exon_number | "1"; | gene_type | " |
| At_chr8 | Cufflinks | exon | 66034398 | 66035697 | . | . | gene_id | "XLOC_101635"; | transcript_id | "Novel_001369"; | exon_number | "2"; | gene_type | " |
| At_chr8 | Cufflinks | exon | 66036681 | 66037040 | . | . | gene_id | "XLOC_101635"; | transcript_id | "Novel_001369"; | exon_number | "3"; | gene_type | " |
| At_chr8 | Cufflinks | exon | 66037336 | 66037569 | . | . | gene_id | "XLOC_101635"; | transcript_id | "Novel_001369"; | exon_number | "4"; | gene_type | " |
| At_chr8 | Cufflinks | exon | 66037712 | 66037907 | . | . | gene_id | "XLOC_101635"; | transcript_id | "Novel_001369"; | exon_number | "5"; | gene_type | " |
| At_chr8 | Cufflinks | exon | 67200669 | 67200879 | . | . | gene_id | "XLOC_101667"; | transcript_id | "Novel_001370"; | exon_number | "1"; | gene_type | " |
| At_chr8 | Cufflinks | exon | 70819569 | 70822606 | . | . | gene_id | "XLOC_101837"; | transcript_id | "Novel_001371"; | exon_number | "1"; | gene_type | " |
| At_chr8 | Cufflinks | exon | 71512973 | 71513191 | . | . | gene_id | "XLOC_101859"; | transcript_id | "Novel_001372"; | exon_number | "1"; | gene_type | " |
| At_chr8 | Cufflinks | exon | 71513287 | 71513337 | . | . | gene_id | "XLOC_101859"; | transcript_id | "Novel_001372"; | exon_number | "2"; | gene_type | " |
| At_chr8 | Cufflinks | exon | 71656406 | 71657428 | . | . | gene_id | "XLOC_101874"; | transcript_id | "Novel_001373"; | exon_number | "1"; | gene_type | " |
| At_chr8 | Cufflinks | exon | 73544721 | 73545320 | . | . | gene_id | "XLOC_102053"; | transcript_id | "Novel_001374"; | exon_number | "1"; | gene_type | " |
| At_chr8 | Cufflinks | exon | 73545401 | 73545464 | . | . | gene_id | "XLOC_102053"; | transcript_id | "Novel_001374"; | exon_number | "2"; | gene_type | " |
| At_chr8 | Cufflinks | exon | 73545622 | 73545695 | . | . | gene_id | "XLOC_102053"; | transcript_id | "Novel_001374"; | exon_number | "3"; | gene_type | " |
| At_chr8 | Cufflinks | exon | 73546410 | 73546525 | . | . | gene_id | "XLOC_102053"; | transcript_id | "Novel_001374"; | exon_number | "4"; | gene_type | " |
| At_chr8 | Cufflinks | exon | 73546699 | 73546964 | . | . | gene_id | "XLOC_102053"; | transcript_id | "Novel_001374"; | exon_number | "5"; | gene_type | " |
| At_chr8 | Cufflinks | exon | 73548145 | 73548424 | . | . | gene_id | "XLOC_102053"; | transcript_id | "Novel_001374"; | exon_number | "6"; | gene_type | " |
| At_chr8 | Cufflinks | exon | 73545053 | 73545320 | . | . | gene_id | "XLOC_102053"; | transcript_id | "Novel_001375"; | exon_number | "1"; | gene_type | " |
| At_chr8 | Cufflinks | exon | 73545401 | 73545464 | . | . | gene_id | "XLOC_102053"; | transcript_id | "Novel_001375"; | exon_number | "2"; | gene_type | " |
| At_chr8 | Cufflinks | exon | 73545622 | 73545695 | . | . | gene_id | "XLOC_102053"; | transcript_id | "Novel_001375"; | exon_number | "3"; | gene_type | " |
| At_chr8 | Cufflinks | exon | 73546410 | 73546525 | . | . | gene_id | "XLOC_102053"; | transcript_id | "Novel_001375"; | exon_number | "4"; | gene_type | " |
| At_chr8 | Cufflinks | exon | 73546699 | 73547149 | . | . | gene_id | "XLOC_102053"; | transcript_id | "Novel_001375"; | exon_number | "5"; | gene_type | " |
| At_chr8 | Cufflinks | exon | 74776568 | 74776903 | . | . | gene_id | "XLOC_102147"; | transcript_id | "Novel_001376"; | exon_number | "1"; | gene_type | " |
| At_chr8 | Cufflinks | exon | 74777000 | 74777152 | . | . | gene_id | "XLOC_102147"; | transcript_id | "Novel_001376"; | exon_number | "2"; | gene_type | " |
| At_chr8 | Cufflinks | exon | 74777881 | 74777948 | . | . | gene_id | "XLOC_102147"; | transcript_id | "Novel_001376"; | exon_number | "3"; | gene_type | " |
| At_chr8 | Cufflinks | exon | 74778055 | 74778212 | . | . | gene_id | "XLOC_102147"; | transcript_id | "Novel_001376"; | exon_number | "4"; | gene_type | " |
| At_chr8 | Cufflinks | exon | 76826282 | 76827145 | . | . | gene_id | "XLOC_102311"; | transcript_id | "Novel_001377"; | exon_number | "1"; | gene_type | " |
| At_chr8 | Cufflinks | exon | 76827255 | 76827802 | . | . | gene_id | "XLOC_102311"; | transcript_id | "Novel_001377"; | exon_number | "2"; | gene_type | " |
| At_chr8 | Cufflinks | exon | 76826292 | 76827145 | . | . | gene_id | "XLOC_102311"; | transcript_id | "Novel_001378"; | exon_number | "1"; | gene_type | " |
| At_chr8 | Cufflinks | exon | 76827255 | 76827384 | . | . | gene_id | "XLOC_102311"; | transcript_id | "Novel_001378"; | exon_number | "2"; | gene_type | " |
| At_chr8 | Cufflinks | exon | 76827502 | 76827746 | . | . | gene_id | "XLOC_102311"; | transcript_id | "Novel_001378"; | exon_number | "3"; | gene_type | " |
| At_chr8 | Cufflinks | exon | 76826294 | 76827145 | . | . | gene_id | "XLOC_102311"; | transcript_id | "Novel_001379"; | exon_number | "1"; | gene_type | " |
| At_chr8 | Cufflinks | exon | 76827262 | 76827691 | . | . | gene_id | "XLOC_102311"; | transcript_id | "Novel_001379"; | exon_number | "2"; | gene_type | " |



|         |           |      |          |          |   |   |   |         |                |               |                 |             |      |           |   |
|---------|-----------|------|----------|----------|---|---|---|---------|----------------|---------------|-----------------|-------------|------|-----------|---|
| At_chr8 | Cufflinks | exon | 76895963 | 76897543 | . | - | . | gene_id | "XLOC_102313"; | transcript_id | "Novel_001380"; | exon_number | "1"; | gene_type | " |
| At_chr8 | Cufflinks | exon | 76898459 | 76898904 | . | - | . | gene_id | "XLOC_102313"; | transcript_id | "Novel_001380"; | exon_number | "2"; | gene_type | " |
| At_chr8 | Cufflinks | exon | 77720895 | 77722888 | . | - | . | gene_id | "XLOC_102381"; | transcript_id | "Novel_001381"; | exon_number | "1"; | gene_type | " |
| At_chr8 | Cufflinks | exon | 77723576 | 77723657 | . | - | . | gene_id | "XLOC_102381"; | transcript_id | "Novel_001381"; | exon_number | "2"; | gene_type | " |
| At_chr8 | Cufflinks | exon | 78401401 | 78404503 | . | - | . | gene_id | "XLOC_102450"; | transcript_id | "Novel_001382"; | exon_number | "1"; | gene_type | " |
| At_chr8 | Cufflinks | exon | 78404824 | 78405919 | . | - | . | gene_id | "XLOC_102450"; | transcript_id | "Novel_001382"; | exon_number | "2"; | gene_type | " |
| At_chr9 | Cufflinks | exon | 769007   | 769369   | . | + | . | gene_id | "XLOC_102575"; | transcript_id | "Novel_001383"; | exon_number | "1"; | gene_type | " |
| At_chr9 | Cufflinks | exon | 771367   | 771503   | . | + | . | gene_id | "XLOC_102575"; | transcript_id | "Novel_001383"; | exon_number | "2"; | gene_type | " |
| At_chr9 | Cufflinks | exon | 771619   | 771721   | . | + | . | gene_id | "XLOC_102575"; | transcript_id | "Novel_001383"; | exon_number | "3"; | gene_type | " |
| At_chr9 | Cufflinks | exon | 771840   | 771934   | . | + | . | gene_id | "XLOC_102575"; | transcript_id | "Novel_001383"; | exon_number | "4"; | gene_type | " |
| At_chr9 | Cufflinks | exon | 772655   | 772731   | . | + | . | gene_id | "XLOC_102575"; | transcript_id | "Novel_001383"; | exon_number | "5"; | gene_type | " |
| At_chr9 | Cufflinks | exon | 774168   | 775069   | . | + | . | gene_id | "XLOC_102575"; | transcript_id | "Novel_001383"; | exon_number | "6"; | gene_type | " |
| At_chr9 | Cufflinks | exon | 771324   | 771503   | . | + | . | gene_id | "XLOC_102575"; | transcript_id | "Novel_001384"; | exon_number | "1"; | gene_type | " |
| At_chr9 | Cufflinks | exon | 771619   | 771721   | . | + | . | gene_id | "XLOC_102575"; | transcript_id | "Novel_001384"; | exon_number | "2"; | gene_type | " |
| At_chr9 | Cufflinks | exon | 771840   | 771934   | . | + | . | gene_id | "XLOC_102575"; | transcript_id | "Novel_001384"; | exon_number | "3"; | gene_type | " |
| At_chr9 | Cufflinks | exon | 772655   | 772731   | . | + | . | gene_id | "XLOC_102575"; | transcript_id | "Novel_001384"; | exon_number | "4"; | gene_type | " |
| At_chr9 | Cufflinks | exon | 774168   | 775069   | . | + | . | gene_id | "XLOC_102575"; | transcript_id | "Novel_001384"; | exon_number | "5"; | gene_type | " |
| At_chr9 | Cufflinks | exon | 3073886  | 3074030  | . | + | . | gene_id | "XLOC_102742"; | transcript_id | "Novel_001385"; | exon_number | "1"; | gene_type | " |
| At_chr9 | Cufflinks | exon | 3074132  | 3074247  | . | + | . | gene_id | "XLOC_102742"; | transcript_id | "Novel_001385"; | exon_number | "2"; | gene_type | " |
| At_chr9 | Cufflinks | exon | 3075266  | 3076286  | . | + | . | gene_id | "XLOC_102742"; | transcript_id | "Novel_001385"; | exon_number | "3"; | gene_type | " |
| At_chr9 | Cufflinks | exon | 7993261  | 7993337  | . | + | . | gene_id | "XLOC_102945"; | transcript_id | "Novel_001386"; | exon_number | "1"; | gene_type | " |
| At_chr9 | Cufflinks | exon | 7993945  | 7994192  | . | + | . | gene_id | "XLOC_102945"; | transcript_id | "Novel_001386"; | exon_number | "2"; | gene_type | " |
| At_chr9 | Cufflinks | exon | 7994876  | 7995575  | . | + | . | gene_id | "XLOC_102945"; | transcript_id | "Novel_001386"; | exon_number | "3"; | gene_type | " |
| At_chr9 | Cufflinks | exon | 7993270  | 7993337  | . | + | . | gene_id | "XLOC_102945"; | transcript_id | "Novel_001387"; | exon_number | "1"; | gene_type | " |
| At_chr9 | Cufflinks | exon | 7993945  | 7994246  | . | + | . | gene_id | "XLOC_102945"; | transcript_id | "Novel_001387"; | exon_number | "2"; | gene_type | " |
| At_chr9 | Cufflinks | exon | 8146574  | 8147093  | . | + | . | gene_id | "XLOC_102957"; | transcript_id | "Novel_001388"; | exon_number | "1"; | gene_type | " |
| At_chr9 | Cufflinks | exon | 8147762  | 8149100  | . | + | . | gene_id | "XLOC_102957"; | transcript_id | "Novel_001388"; | exon_number | "2"; | gene_type | " |
| At_chr9 | Cufflinks | exon | 8146574  | 8147093  | . | + | . | gene_id | "XLOC_102957"; | transcript_id | "Novel_001389"; | exon_number | "1"; | gene_type | " |
| At_chr9 | Cufflinks | exon | 8147833  | 8149100  | . | + | . | gene_id | "XLOC_102957"; | transcript_id | "Novel_001389"; | exon_number | "2"; | gene_type | " |
| At_chr9 | Cufflinks | exon | 8146574  | 8147093  | . | + | . | gene_id | "XLOC_102957"; | transcript_id | "Novel_001390"; | exon_number | "1"; | gene_type | " |
| At_chr9 | Cufflinks | exon | 8147824  | 8149100  | . | + | . | gene_id | "XLOC_102957"; | transcript_id | "Novel_001390"; | exon_number | "2"; | gene_type | " |
| At_chr9 | Cufflinks | exon | 8330098  | 8330745  | . | + | . | gene_id | "XLOC_102966"; | transcript_id | "Novel_001391"; | exon_number | "1"; | gene_type | " |
| At_chr9 | Cufflinks | exon | 8330816  | 8331795  | . | + | . | gene_id | "XLOC_102966"; | transcript_id | "Novel_001391"; | exon_number | "2"; | gene_type | " |
| At_chr9 | Cufflinks | exon | 8330098  | 8330745  | . | + | . | gene_id | "XLOC_102966"; | transcript_id | "Novel_001392"; | exon_number | "1"; | gene_type | " |
| At_chr9 | Cufflinks | exon | 8330816  | 8330921  | . | + | . | gene_id | "XLOC_102966"; | transcript_id | "Novel_001392"; | exon_number | "2"; | gene_type | " |

|         |           |      |          |          |   |   |   |         |                |               |                 |             |       |           |   |
|---------|-----------|------|----------|----------|---|---|---|---------|----------------|---------------|-----------------|-------------|-------|-----------|---|
| At_chr9 | Cufflinks | exon | 8331004  | 8331795  | . | + | . | gene_id | "XLOC_102966"; | transcript_id | "Novel_001392"; | exon_number | "3";  | gene_type | " |
| At_chr9 | Cufflinks | exon | 8394327  | 8397266  | . | + | . | gene_id | "XLOC_102970"; | transcript_id | "Novel_001393"; | exon_number | "1";  | gene_type | " |
| At_chr9 | Cufflinks | exon | 10231322 | 10231762 | . | + | . | gene_id | "XLOC_103018"; | transcript_id | "Novel_001394"; | exon_number | "1";  | gene_type | " |
| At_chr9 | Cufflinks | exon | 10242897 | 10243127 | . | + | . | gene_id | "XLOC_103020"; | transcript_id | "Novel_001395"; | exon_number | "1";  | gene_type | " |
| At_chr9 | Cufflinks | exon | 11909417 | 11909875 | . | + | . | gene_id | "XLOC_103076"; | transcript_id | "Novel_001396"; | exon_number | "1";  | gene_type | " |
| At_chr9 | Cufflinks | exon | 11910518 | 11914222 | . | + | . | gene_id | "XLOC_103076"; | transcript_id | "Novel_001396"; | exon_number | "2";  | gene_type | " |
| At_chr9 | Cufflinks | exon | 19649332 | 19649503 | . | + | . | gene_id | "XLOC_103332"; | transcript_id | "Novel_001397"; | exon_number | "1";  | gene_type | " |
| At_chr9 | Cufflinks | exon | 19650506 | 19650664 | . | + | . | gene_id | "XLOC_103332"; | transcript_id | "Novel_001397"; | exon_number | "2";  | gene_type | " |
| At_chr9 | Cufflinks | exon | 19651135 | 19651188 | . | + | . | gene_id | "XLOC_103332"; | transcript_id | "Novel_001397"; | exon_number | "3";  | gene_type | " |
| At_chr9 | Cufflinks | exon | 19651274 | 19651354 | . | + | . | gene_id | "XLOC_103332"; | transcript_id | "Novel_001397"; | exon_number | "4";  | gene_type | " |
| At_chr9 | Cufflinks | exon | 19656373 | 19656510 | . | + | . | gene_id | "XLOC_103332"; | transcript_id | "Novel_001397"; | exon_number | "5";  | gene_type | " |
| At_chr9 | Cufflinks | exon | 19657604 | 19657763 | . | + | . | gene_id | "XLOC_103332"; | transcript_id | "Novel_001397"; | exon_number | "6";  | gene_type | " |
| At_chr9 | Cufflinks | exon | 19659750 | 19659829 | . | + | . | gene_id | "XLOC_103332"; | transcript_id | "Novel_001397"; | exon_number | "7";  | gene_type | " |
| At_chr9 | Cufflinks | exon | 19659961 | 19660106 | . | + | . | gene_id | "XLOC_103332"; | transcript_id | "Novel_001397"; | exon_number | "8";  | gene_type | " |
| At_chr9 | Cufflinks | exon | 19660244 | 19660301 | . | + | . | gene_id | "XLOC_103332"; | transcript_id | "Novel_001397"; | exon_number | "9";  | gene_type | " |
| At_chr9 | Cufflinks | exon | 19660384 | 19660782 | . | + | . | gene_id | "XLOC_103332"; | transcript_id | "Novel_001397"; | exon_number | "10"; | gene_type | " |
| At_chr9 | Cufflinks | exon | 22095568 | 22099019 | . | + | . | gene_id | "XLOC_103429"; | transcript_id | "Novel_001398"; | exon_number | "1";  | gene_type | " |
| At_chr9 | Cufflinks | exon | 22608985 | 22609224 | . | + | . | gene_id | "XLOC_103520"; | transcript_id | "Novel_001399"; | exon_number | "1";  | gene_type | " |
| At_chr9 | Cufflinks | exon | 22609475 | 22609507 | . | + | . | gene_id | "XLOC_103520"; | transcript_id | "Novel_001399"; | exon_number | "2";  | gene_type | " |
| At_chr9 | Cufflinks | exon | 22610134 | 22610244 | . | + | . | gene_id | "XLOC_103520"; | transcript_id | "Novel_001399"; | exon_number | "3";  | gene_type | " |
| At_chr9 | Cufflinks | exon | 22610330 | 22610425 | . | + | . | gene_id | "XLOC_103520"; | transcript_id | "Novel_001399"; | exon_number | "4";  | gene_type | " |
| At_chr9 | Cufflinks | exon | 22610820 | 22610894 | . | + | . | gene_id | "XLOC_103520"; | transcript_id | "Novel_001399"; | exon_number | "5";  | gene_type | " |
| At_chr9 | Cufflinks | exon | 22610982 | 22611298 | . | + | . | gene_id | "XLOC_103520"; | transcript_id | "Novel_001399"; | exon_number | "6";  | gene_type | " |
| At_chr9 | Cufflinks | exon | 22608985 | 22609224 | . | + | . | gene_id | "XLOC_103520"; | transcript_id | "Novel_001400"; | exon_number | "1";  | gene_type | " |
| At_chr9 | Cufflinks | exon | 22609475 | 22609507 | . | + | . | gene_id | "XLOC_103520"; | transcript_id | "Novel_001400"; | exon_number | "2";  | gene_type | " |
| At_chr9 | Cufflinks | exon | 22610128 | 22610244 | . | + | . | gene_id | "XLOC_103520"; | transcript_id | "Novel_001400"; | exon_number | "3";  | gene_type | " |
| At_chr9 | Cufflinks | exon | 22610330 | 22610425 | . | + | . | gene_id | "XLOC_103520"; | transcript_id | "Novel_001400"; | exon_number | "4";  | gene_type | " |
| At_chr9 | Cufflinks | exon | 22610820 | 22610894 | . | + | . | gene_id | "XLOC_103520"; | transcript_id | "Novel_001400"; | exon_number | "5";  | gene_type | " |
| At_chr9 | Cufflinks | exon | 22610982 | 22611298 | . | + | . | gene_id | "XLOC_103520"; | transcript_id | "Novel_001400"; | exon_number | "6";  | gene_type | " |
| At_chr9 | Cufflinks | exon | 23010546 | 23010923 | . | + | . | gene_id | "XLOC_103548"; | transcript_id | "Novel_001401"; | exon_number | "1";  | gene_type | " |
| At_chr9 | Cufflinks | exon | 23011039 | 23011082 | . | + | . | gene_id | "XLOC_103548"; | transcript_id | "Novel_001401"; | exon_number | "2";  | gene_type | " |
| At_chr9 | Cufflinks | exon | 23011246 | 23011313 | . | + | . | gene_id | "XLOC_103548"; | transcript_id | "Novel_001401"; | exon_number | "3";  | gene_type | " |
| At_chr9 | Cufflinks | exon | 23012497 | 23013436 | . | + | . | gene_id | "XLOC_103548"; | transcript_id | "Novel_001401"; | exon_number | "4";  | gene_type | " |
| At_chr9 | Cufflinks | exon | 23494828 | 23495134 | . | + | . | gene_id | "XLOC_103570"; | transcript_id | "Novel_001402"; | exon_number | "1";  | gene_type | " |
| At_chr9 | Cufflinks | exon | 23495211 | 23495297 | . | + | . | gene_id | "XLOC_103570"; | transcript_id | "Novel_001402"; | exon_number | "2";  | gene_type | " |

|         |           |      |          |          |   |   |   |         |                |               |                 |             |      |           |   |
|---------|-----------|------|----------|----------|---|---|---|---------|----------------|---------------|-----------------|-------------|------|-----------|---|
| At_chr9 | Cufflinks | exon | 23495465 | 23495516 | . | + | . | gene_id | "XLOC_103570"; | transcript_id | "Novel_001402"; | exon_number | "3"; | gene_type | " |
| At_chr9 | Cufflinks | exon | 23497535 | 23499743 | . | + | . | gene_id | "XLOC_103570"; | transcript_id | "Novel_001402"; | exon_number | "4"; | gene_type | " |
| At_chr9 | Cufflinks | exon | 28235896 | 28236105 | . | + | . | gene_id | "XLOC_103735"; | transcript_id | "Novel_001403"; | exon_number | "1"; | gene_type | " |
| At_chr9 | Cufflinks | exon | 28682950 | 28683220 | . | + | . | gene_id | "XLOC_103750"; | transcript_id | "Novel_001404"; | exon_number | "1"; | gene_type | " |
| At_chr9 | Cufflinks | exon | 28683758 | 28686193 | . | + | . | gene_id | "XLOC_103750"; | transcript_id | "Novel_001404"; | exon_number | "2"; | gene_type | " |
| At_chr9 | Cufflinks | exon | 28682956 | 28683220 | . | + | . | gene_id | "XLOC_103750"; | transcript_id | "Novel_001405"; | exon_number | "1"; | gene_type | " |
| At_chr9 | Cufflinks | exon | 28683736 | 28686018 | . | + | . | gene_id | "XLOC_103750"; | transcript_id | "Novel_001405"; | exon_number | "2"; | gene_type | " |
| At_chr9 | Cufflinks | exon | 32493422 | 32493639 | . | + | . | gene_id | "XLOC_104050"; | transcript_id | "Novel_001406"; | exon_number | "1"; | gene_type | " |
| At_chr9 | Cufflinks | exon | 32811555 | 32812043 | . | + | . | gene_id | "XLOC_104111"; | transcript_id | "Novel_001407"; | exon_number | "1"; | gene_type | " |
| At_chr9 | Cufflinks | exon | 32812123 | 32812496 | . | + | . | gene_id | "XLOC_104111"; | transcript_id | "Novel_001407"; | exon_number | "2"; | gene_type | " |
| At_chr9 | Cufflinks | exon | 32811559 | 32812037 | . | + | . | gene_id | "XLOC_104111"; | transcript_id | "Novel_001408"; | exon_number | "1"; | gene_type | " |
| At_chr9 | Cufflinks | exon | 32812123 | 32812472 | . | + | . | gene_id | "XLOC_104111"; | transcript_id | "Novel_001408"; | exon_number | "2"; | gene_type | " |
| At_chr9 | Cufflinks | exon | 32850918 | 32851256 | . | + | . | gene_id | "XLOC_104118"; | transcript_id | "Novel_001409"; | exon_number | "1"; | gene_type | " |
| At_chr9 | Cufflinks | exon | 32851348 | 32851436 | . | + | . | gene_id | "XLOC_104118"; | transcript_id | "Novel_001409"; | exon_number | "2"; | gene_type | " |
| At_chr9 | Cufflinks | exon | 32853078 | 32853148 | . | + | . | gene_id | "XLOC_104118"; | transcript_id | "Novel_001409"; | exon_number | "3"; | gene_type | " |
| At_chr9 | Cufflinks | exon | 32853248 | 32853295 | . | + | . | gene_id | "XLOC_104118"; | transcript_id | "Novel_001409"; | exon_number | "4"; | gene_type | " |
| At_chr9 | Cufflinks | exon | 33443504 | 33443770 | . | + | . | gene_id | "XLOC_104198"; | transcript_id | "Novel_001410"; | exon_number | "1"; | gene_type | " |
| At_chr9 | Cufflinks | exon | 33443863 | 33443901 | . | + | . | gene_id | "XLOC_104198"; | transcript_id | "Novel_001410"; | exon_number | "2"; | gene_type | " |
| At_chr9 | Cufflinks | exon | 33444726 | 33444817 | . | + | . | gene_id | "XLOC_104198"; | transcript_id | "Novel_001410"; | exon_number | "3"; | gene_type | " |
| At_chr9 | Cufflinks | exon | 33445871 | 33446120 | . | + | . | gene_id | "XLOC_104198"; | transcript_id | "Novel_001410"; | exon_number | "4"; | gene_type | " |
| At_chr9 | Cufflinks | exon | 33446597 | 33447298 | . | + | . | gene_id | "XLOC_104198"; | transcript_id | "Novel_001410"; | exon_number | "5"; | gene_type | " |
| At_chr9 | Cufflinks | exon | 33447462 | 33447570 | . | + | . | gene_id | "XLOC_104198"; | transcript_id | "Novel_001410"; | exon_number | "6"; | gene_type | " |
| At_chr9 | Cufflinks | exon | 33449630 | 33449722 | . | + | . | gene_id | "XLOC_104198"; | transcript_id | "Novel_001410"; | exon_number | "7"; | gene_type | " |
| At_chr9 | Cufflinks | exon | 33451242 | 33451402 | . | + | . | gene_id | "XLOC_104198"; | transcript_id | "Novel_001410"; | exon_number | "8"; | gene_type | " |
| At_chr9 | Cufflinks | exon | 33452025 | 33453092 | . | + | . | gene_id | "XLOC_104198"; | transcript_id | "Novel_001410"; | exon_number | "9"; | gene_type | " |
| At_chr9 | Cufflinks | exon | 33443524 | 33443770 | . | + | . | gene_id | "XLOC_104198"; | transcript_id | "Novel_001411"; | exon_number | "1"; | gene_type | " |
| At_chr9 | Cufflinks | exon | 33443863 | 33444644 | . | + | . | gene_id | "XLOC_104198"; | transcript_id | "Novel_001411"; | exon_number | "2"; | gene_type | " |
| At_chr9 | Cufflinks | exon | 37136874 | 37137953 | . | + | . | gene_id | "XLOC_104567"; | transcript_id | "Novel_001412"; | exon_number | "1"; | gene_type | " |
| At_chr9 | Cufflinks | exon | 37138385 | 37138657 | . | + | . | gene_id | "XLOC_104567"; | transcript_id | "Novel_001412"; | exon_number | "2"; | gene_type | " |
| At_chr9 | Cufflinks | exon | 37139085 | 37139347 | . | + | . | gene_id | "XLOC_104567"; | transcript_id | "Novel_001412"; | exon_number | "3"; | gene_type | " |
| At_chr9 | Cufflinks | exon | 37140825 | 37141417 | . | + | . | gene_id | "XLOC_104567"; | transcript_id | "Novel_001412"; | exon_number | "4"; | gene_type | " |
| At_chr9 | Cufflinks | exon | 37136874 | 37137698 | . | + | . | gene_id | "XLOC_104567"; | transcript_id | "Novel_001413"; | exon_number | "1"; | gene_type | " |
| At_chr9 | Cufflinks | exon | 37137826 | 37137953 | . | + | . | gene_id | "XLOC_104567"; | transcript_id | "Novel_001413"; | exon_number | "2"; | gene_type | " |
| At_chr9 | Cufflinks | exon | 37138385 | 37138657 | . | + | . | gene_id | "XLOC_104567"; | transcript_id | "Novel_001413"; | exon_number | "3"; | gene_type | " |
| At_chr9 | Cufflinks | exon | 37139085 | 37139347 | . | + | . | gene_id | "XLOC_104567"; | transcript_id | "Novel_001413"; | exon_number | "4"; | gene_type | " |

|         |           |      |          |          |   |   |   |         |                |               |                 |             |      |           |   |
|---------|-----------|------|----------|----------|---|---|---|---------|----------------|---------------|-----------------|-------------|------|-----------|---|
| At_chr9 | Cufflinks | exon | 37140825 | 37141417 | . | + | . | gene_id | "XLOC_104567"; | transcript_id | "Novel_001413"; | exon_number | "5"; | gene_type | " |
| At_chr9 | Cufflinks | exon | 37234260 | 37234361 | . | + | . | gene_id | "XLOC_104577"; | transcript_id | "Novel_001414"; | exon_number | "1"; | gene_type | " |
| At_chr9 | Cufflinks | exon | 37234587 | 37234692 | . | + | . | gene_id | "XLOC_104577"; | transcript_id | "Novel_001414"; | exon_number | "2"; | gene_type | " |
| At_chr9 | Cufflinks | exon | 37299744 | 37299827 | . | + | . | gene_id | "XLOC_104591"; | transcript_id | "Novel_001415"; | exon_number | "1"; | gene_type | " |
| At_chr9 | Cufflinks | exon | 37300996 | 37301182 | . | + | . | gene_id | "XLOC_104591"; | transcript_id | "Novel_001415"; | exon_number | "2"; | gene_type | " |
| At_chr9 | Cufflinks | exon | 37301276 | 37301441 | . | + | . | gene_id | "XLOC_104591"; | transcript_id | "Novel_001415"; | exon_number | "3"; | gene_type | " |
| At_chr9 | Cufflinks | exon | 37301549 | 37301586 | . | + | . | gene_id | "XLOC_104591"; | transcript_id | "Novel_001415"; | exon_number | "4"; | gene_type | " |
| At_chr9 | Cufflinks | exon | 37301674 | 37301725 | . | + | . | gene_id | "XLOC_104591"; | transcript_id | "Novel_001415"; | exon_number | "5"; | gene_type | " |
| At_chr9 | Cufflinks | exon | 37301850 | 37302159 | . | + | . | gene_id | "XLOC_104591"; | transcript_id | "Novel_001415"; | exon_number | "6"; | gene_type | " |
| At_chr9 | Cufflinks | exon | 40707305 | 40707330 | . | + | . | gene_id | "XLOC_105070"; | transcript_id | "Novel_001416"; | exon_number | "1"; | gene_type | " |
| At_chr9 | Cufflinks | exon | 40707427 | 40707604 | . | + | . | gene_id | "XLOC_105070"; | transcript_id | "Novel_001416"; | exon_number | "2"; | gene_type | " |
| At_chr9 | Cufflinks | exon | 41983414 | 41983473 | . | + | . | gene_id | "XLOC_105273"; | transcript_id | "Novel_001417"; | exon_number | "1"; | gene_type | " |
| At_chr9 | Cufflinks | exon | 41983606 | 41984785 | . | + | . | gene_id | "XLOC_105273"; | transcript_id | "Novel_001417"; | exon_number | "2"; | gene_type | " |
| At_chr9 | Cufflinks | exon | 42726943 | 42729307 | . | + | . | gene_id | "XLOC_105389"; | transcript_id | "Novel_001418"; | exon_number | "1"; | gene_type | " |
| At_chr9 | Cufflinks | exon | 42729602 | 42730334 | . | + | . | gene_id | "XLOC_105389"; | transcript_id | "Novel_001418"; | exon_number | "2"; | gene_type | " |
| At_chr9 | Cufflinks | exon | 42726960 | 42729181 | . | + | . | gene_id | "XLOC_105389"; | transcript_id | "Novel_001419"; | exon_number | "1"; | gene_type | " |
| At_chr9 | Cufflinks | exon | 42729278 | 42729307 | . | + | . | gene_id | "XLOC_105389"; | transcript_id | "Novel_001419"; | exon_number | "2"; | gene_type | " |
| At_chr9 | Cufflinks | exon | 42729602 | 42729795 | . | + | . | gene_id | "XLOC_105389"; | transcript_id | "Novel_001419"; | exon_number | "3"; | gene_type | " |
| At_chr9 | Cufflinks | exon | 43713785 | 43714356 | . | + | . | gene_id | "XLOC_105579"; | transcript_id | "Novel_001420"; | exon_number | "1"; | gene_type | " |
| At_chr9 | Cufflinks | exon | 43715413 | 43715682 | . | + | . | gene_id | "XLOC_105579"; | transcript_id | "Novel_001420"; | exon_number | "2"; | gene_type | " |
| At_chr9 | Cufflinks | exon | 43715776 | 43716621 | . | + | . | gene_id | "XLOC_105579"; | transcript_id | "Novel_001420"; | exon_number | "3"; | gene_type | " |
| At_chr9 | Cufflinks | exon | 43972636 | 43973447 | . | + | . | gene_id | "XLOC_105607"; | transcript_id | "Novel_001421"; | exon_number | "1"; | gene_type | " |
| At_chr9 | Cufflinks | exon | 43973799 | 43973861 | . | + | . | gene_id | "XLOC_105607"; | transcript_id | "Novel_001421"; | exon_number | "2"; | gene_type | " |
| At_chr9 | Cufflinks | exon | 43973962 | 43974278 | . | + | . | gene_id | "XLOC_105607"; | transcript_id | "Novel_001421"; | exon_number | "3"; | gene_type | " |
| At_chr9 | Cufflinks | exon | 43974447 | 43974573 | . | + | . | gene_id | "XLOC_105607"; | transcript_id | "Novel_001421"; | exon_number | "4"; | gene_type | " |
| At_chr9 | Cufflinks | exon | 43972948 | 43973447 | . | + | . | gene_id | "XLOC_105607"; | transcript_id | "Novel_001422"; | exon_number | "1"; | gene_type | " |
| At_chr9 | Cufflinks | exon | 43973799 | 43973861 | . | + | . | gene_id | "XLOC_105607"; | transcript_id | "Novel_001422"; | exon_number | "2"; | gene_type | " |
| At_chr9 | Cufflinks | exon | 43973962 | 43974039 | . | + | . | gene_id | "XLOC_105607"; | transcript_id | "Novel_001422"; | exon_number | "3"; | gene_type | " |
| At_chr9 | Cufflinks | exon | 43974116 | 43974278 | . | + | . | gene_id | "XLOC_105607"; | transcript_id | "Novel_001422"; | exon_number | "4"; | gene_type | " |
| At_chr9 | Cufflinks | exon | 43974447 | 43974907 | . | + | . | gene_id | "XLOC_105607"; | transcript_id | "Novel_001422"; | exon_number | "5"; | gene_type | " |
| At_chr9 | Cufflinks | exon | 44489424 | 44489873 | . | + | . | gene_id | "XLOC_105709"; | transcript_id | "Novel_001423"; | exon_number | "1"; | gene_type | " |
| At_chr9 | Cufflinks | exon | 44489966 | 44490142 | . | + | . | gene_id | "XLOC_105709"; | transcript_id | "Novel_001423"; | exon_number | "2"; | gene_type | " |
| At_chr9 | Cufflinks | exon | 44490252 | 44490476 | . | + | . | gene_id | "XLOC_105709"; | transcript_id | "Novel_001423"; | exon_number | "3"; | gene_type | " |
| At_chr9 | Cufflinks | exon | 44490588 | 44490716 | . | + | . | gene_id | "XLOC_105709"; | transcript_id | "Novel_001423"; | exon_number | "4"; | gene_type | " |
| At_chr9 | Cufflinks | exon | 44490933 | 44491487 | . | + | . | gene_id | "XLOC_105709"; | transcript_id | "Novel_001423"; | exon_number | "5"; | gene_type | " |

|         |           |      |          |          |   |   |   |         |                |               |                 |             |      |           |   |
|---------|-----------|------|----------|----------|---|---|---|---------|----------------|---------------|-----------------|-------------|------|-----------|---|
| At_chr9 | Cufflinks | exon | 45262486 | 45262720 | . | + | . | gene_id | "XLOC_105865"; | transcript_id | "Novel_001424"; | exon_number | "1"; | gene_type | " |
| At_chr9 | Cufflinks | exon | 45265078 | 45265312 | . | + | . | gene_id | "XLOC_105866"; | transcript_id | "Novel_001425"; | exon_number | "1"; | gene_type | " |
| At_chr9 | Cufflinks | exon | 45399473 | 45399903 | . | + | . | gene_id | "XLOC_105895"; | transcript_id | "Novel_001426"; | exon_number | "1"; | gene_type | " |
| At_chr9 | Cufflinks | exon | 45400703 | 45400989 | . | + | . | gene_id | "XLOC_105895"; | transcript_id | "Novel_001426"; | exon_number | "2"; | gene_type | " |
| At_chr9 | Cufflinks | exon | 45399654 | 45399681 | . | + | . | gene_id | "XLOC_105895"; | transcript_id | "Novel_001427"; | exon_number | "1"; | gene_type | " |
| At_chr9 | Cufflinks | exon | 45399757 | 45399903 | . | + | . | gene_id | "XLOC_105895"; | transcript_id | "Novel_001427"; | exon_number | "2"; | gene_type | " |
| At_chr9 | Cufflinks | exon | 45400703 | 45401034 | . | + | . | gene_id | "XLOC_105895"; | transcript_id | "Novel_001427"; | exon_number | "3"; | gene_type | " |
| At_chr9 | Cufflinks | exon | 45402419 | 45402705 | . | + | . | gene_id | "XLOC_105897"; | transcript_id | "Novel_001428"; | exon_number | "1"; | gene_type | " |
| At_chr9 | Cufflinks | exon | 45403693 | 45403890 | . | + | . | gene_id | "XLOC_105897"; | transcript_id | "Novel_001428"; | exon_number | "2"; | gene_type | " |
| At_chr9 | Cufflinks | exon | 45404038 | 45404186 | . | + | . | gene_id | "XLOC_105897"; | transcript_id | "Novel_001428"; | exon_number | "3"; | gene_type | " |
| At_chr9 | Cufflinks | exon | 45404302 | 45405223 | . | + | . | gene_id | "XLOC_105897"; | transcript_id | "Novel_001428"; | exon_number | "4"; | gene_type | " |
| At_chr9 | Cufflinks | exon | 45402481 | 45402705 | . | + | . | gene_id | "XLOC_105897"; | transcript_id | "Novel_001429"; | exon_number | "1"; | gene_type | " |
| At_chr9 | Cufflinks | exon | 45403693 | 45404186 | . | + | . | gene_id | "XLOC_105897"; | transcript_id | "Novel_001429"; | exon_number | "2"; | gene_type | " |
| At_chr9 | Cufflinks | exon | 45404302 | 45404997 | . | + | . | gene_id | "XLOC_105897"; | transcript_id | "Novel_001429"; | exon_number | "3"; | gene_type | " |
| At_chr9 | Cufflinks | exon | 47247139 | 47247536 | . | + | . | gene_id | "XLOC_106198"; | transcript_id | "Novel_001430"; | exon_number | "1"; | gene_type | " |
| At_chr9 | Cufflinks | exon | 48066313 | 48066480 | . | + | . | gene_id | "XLOC_106290"; | transcript_id | "Novel_001431"; | exon_number | "1"; | gene_type | " |
| At_chr9 | Cufflinks | exon | 48066567 | 48066634 | . | + | . | gene_id | "XLOC_106290"; | transcript_id | "Novel_001431"; | exon_number | "2"; | gene_type | " |
| At_chr9 | Cufflinks | exon | 48067095 | 48067205 | . | + | . | gene_id | "XLOC_106290"; | transcript_id | "Novel_001431"; | exon_number | "3"; | gene_type | " |
| At_chr9 | Cufflinks | exon | 48067606 | 48067692 | . | + | . | gene_id | "XLOC_106290"; | transcript_id | "Novel_001431"; | exon_number | "4"; | gene_type | " |
| At_chr9 | Cufflinks | exon | 48067836 | 48068044 | . | + | . | gene_id | "XLOC_106290"; | transcript_id | "Novel_001431"; | exon_number | "5"; | gene_type | " |
| At_chr9 | Cufflinks | exon | 48068132 | 48068664 | . | + | . | gene_id | "XLOC_106290"; | transcript_id | "Novel_001431"; | exon_number | "6"; | gene_type | " |
| At_chr9 | Cufflinks | exon | 49168173 | 49168641 | . | + | . | gene_id | "XLOC_106454"; | transcript_id | "Novel_001432"; | exon_number | "1"; | gene_type | " |
| At_chr9 | Cufflinks | exon | 49169339 | 49169410 | . | + | . | gene_id | "XLOC_106454"; | transcript_id | "Novel_001432"; | exon_number | "2"; | gene_type | " |
| At_chr9 | Cufflinks | exon | 49169692 | 49169787 | . | + | . | gene_id | "XLOC_106454"; | transcript_id | "Novel_001432"; | exon_number | "3"; | gene_type | " |
| At_chr9 | Cufflinks | exon | 49169942 | 49170166 | . | + | . | gene_id | "XLOC_106454"; | transcript_id | "Novel_001432"; | exon_number | "4"; | gene_type | " |
| At_chr9 | Cufflinks | exon | 49170732 | 49170829 | . | + | . | gene_id | "XLOC_106454"; | transcript_id | "Novel_001432"; | exon_number | "5"; | gene_type | " |
| At_chr9 | Cufflinks | exon | 49171084 | 49171171 | . | + | . | gene_id | "XLOC_106454"; | transcript_id | "Novel_001432"; | exon_number | "6"; | gene_type | " |
| At_chr9 | Cufflinks | exon | 49171378 | 49171716 | . | + | . | gene_id | "XLOC_106454"; | transcript_id | "Novel_001432"; | exon_number | "7"; | gene_type | " |
| At_chr9 | Cufflinks | exon | 49171811 | 49172053 | . | + | . | gene_id | "XLOC_106454"; | transcript_id | "Novel_001432"; | exon_number | "8"; | gene_type | " |
| At_chr9 | Cufflinks | exon | 49172156 | 49173764 | . | + | . | gene_id | "XLOC_106454"; | transcript_id | "Novel_001432"; | exon_number | "9"; | gene_type | " |
| At_chr9 | Cufflinks | exon | 49168184 | 49168641 | . | + | . | gene_id | "XLOC_106454"; | transcript_id | "Novel_001433"; | exon_number | "1"; | gene_type | " |
| At_chr9 | Cufflinks | exon | 49169339 | 49169410 | . | + | . | gene_id | "XLOC_106454"; | transcript_id | "Novel_001433"; | exon_number | "2"; | gene_type | " |
| At_chr9 | Cufflinks | exon | 49169692 | 49169787 | . | + | . | gene_id | "XLOC_106454"; | transcript_id | "Novel_001433"; | exon_number | "3"; | gene_type | " |
| At_chr9 | Cufflinks | exon | 49169954 | 49170166 | . | + | . | gene_id | "XLOC_106454"; | transcript_id | "Novel_001433"; | exon_number | "4"; | gene_type | " |
| At_chr9 | Cufflinks | exon | 49170732 | 49170829 | . | + | . | gene_id | "XLOC_106454"; | transcript_id | "Novel_001433"; | exon_number | "5"; | gene_type | " |

|         |           |      |          |          |   |   |   |         |                |               |                 |             |      |           |   |
|---------|-----------|------|----------|----------|---|---|---|---------|----------------|---------------|-----------------|-------------|------|-----------|---|
| At_chr9 | Cufflinks | exon | 49171084 | 49171171 | . | + | . | gene_id | "XLOC_106454"; | transcript_id | "Novel_001433"; | exon_number | "6"; | gene_type | " |
| At_chr9 | Cufflinks | exon | 49171378 | 49171716 | . | + | . | gene_id | "XLOC_106454"; | transcript_id | "Novel_001433"; | exon_number | "7"; | gene_type | " |
| At_chr9 | Cufflinks | exon | 49171811 | 49172053 | . | + | . | gene_id | "XLOC_106454"; | transcript_id | "Novel_001433"; | exon_number | "8"; | gene_type | " |
| At_chr9 | Cufflinks | exon | 49172156 | 49173685 | . | + | . | gene_id | "XLOC_106454"; | transcript_id | "Novel_001433"; | exon_number | "9"; | gene_type | " |
| At_chr9 | Cufflinks | exon | 49168187 | 49168641 | . | + | . | gene_id | "XLOC_106454"; | transcript_id | "Novel_001434"; | exon_number | "1"; | gene_type | " |
| At_chr9 | Cufflinks | exon | 49169339 | 49169410 | . | + | . | gene_id | "XLOC_106454"; | transcript_id | "Novel_001434"; | exon_number | "2"; | gene_type | " |
| At_chr9 | Cufflinks | exon | 49169692 | 49169787 | . | + | . | gene_id | "XLOC_106454"; | transcript_id | "Novel_001434"; | exon_number | "3"; | gene_type | " |
| At_chr9 | Cufflinks | exon | 49169942 | 49170166 | . | + | . | gene_id | "XLOC_106454"; | transcript_id | "Novel_001434"; | exon_number | "4"; | gene_type | " |
| At_chr9 | Cufflinks | exon | 49170732 | 49170829 | . | + | . | gene_id | "XLOC_106454"; | transcript_id | "Novel_001434"; | exon_number | "5"; | gene_type | " |
| At_chr9 | Cufflinks | exon | 49171084 | 49171171 | . | + | . | gene_id | "XLOC_106454"; | transcript_id | "Novel_001434"; | exon_number | "6"; | gene_type | " |
| At_chr9 | Cufflinks | exon | 49171378 | 49172053 | . | + | . | gene_id | "XLOC_106454"; | transcript_id | "Novel_001434"; | exon_number | "7"; | gene_type | " |
| At_chr9 | Cufflinks | exon | 49172156 | 49173511 | . | + | . | gene_id | "XLOC_106454"; | transcript_id | "Novel_001434"; | exon_number | "8"; | gene_type | " |
| At_chr9 | Cufflinks | exon | 49175266 | 49176376 | . | + | . | gene_id | "XLOC_106456"; | transcript_id | "Novel_001435"; | exon_number | "1"; | gene_type | " |
| At_chr9 | Cufflinks | exon | 49176483 | 49176777 | . | + | . | gene_id | "XLOC_106456"; | transcript_id | "Novel_001435"; | exon_number | "2"; | gene_type | " |
| At_chr9 | Cufflinks | exon | 49176919 | 49177228 | . | + | . | gene_id | "XLOC_106456"; | transcript_id | "Novel_001435"; | exon_number | "3"; | gene_type | " |
| At_chr9 | Cufflinks | exon | 49177721 | 49177878 | . | + | . | gene_id | "XLOC_106456"; | transcript_id | "Novel_001435"; | exon_number | "4"; | gene_type | " |
| At_chr9 | Cufflinks | exon | 49178023 | 49178695 | . | + | . | gene_id | "XLOC_106456"; | transcript_id | "Novel_001435"; | exon_number | "5"; | gene_type | " |
| At_chr9 | Cufflinks | exon | 49175266 | 49176376 | . | + | . | gene_id | "XLOC_106456"; | transcript_id | "Novel_001436"; | exon_number | "1"; | gene_type | " |
| At_chr9 | Cufflinks | exon | 49176483 | 49176777 | . | + | . | gene_id | "XLOC_106456"; | transcript_id | "Novel_001436"; | exon_number | "2"; | gene_type | " |
| At_chr9 | Cufflinks | exon | 49176919 | 49177228 | . | + | . | gene_id | "XLOC_106456"; | transcript_id | "Novel_001436"; | exon_number | "3"; | gene_type | " |
| At_chr9 | Cufflinks | exon | 49177721 | 49178695 | . | + | . | gene_id | "XLOC_106456"; | transcript_id | "Novel_001436"; | exon_number | "4"; | gene_type | " |
| At_chr9 | Cufflinks | exon | 49175268 | 49176376 | . | + | . | gene_id | "XLOC_106456"; | transcript_id | "Novel_001437"; | exon_number | "1"; | gene_type | " |
| At_chr9 | Cufflinks | exon | 49176483 | 49177228 | . | + | . | gene_id | "XLOC_106456"; | transcript_id | "Novel_001437"; | exon_number | "2"; | gene_type | " |
| At_chr9 | Cufflinks | exon | 49177721 | 49178013 | . | + | . | gene_id | "XLOC_106456"; | transcript_id | "Novel_001437"; | exon_number | "3"; | gene_type | " |
| At_chr9 | Cufflinks | exon | 49179068 | 49180397 | . | + | . | gene_id | "XLOC_106458"; | transcript_id | "Novel_001438"; | exon_number | "1"; | gene_type | " |
| At_chr9 | Cufflinks | exon | 49182075 | 49182236 | . | + | . | gene_id | "XLOC_106458"; | transcript_id | "Novel_001438"; | exon_number | "2"; | gene_type | " |
| At_chr9 | Cufflinks | exon | 49182318 | 49183057 | . | + | . | gene_id | "XLOC_106458"; | transcript_id | "Novel_001438"; | exon_number | "3"; | gene_type | " |
| At_chr9 | Cufflinks | exon | 49273764 | 49274024 | . | + | . | gene_id | "XLOC_106467"; | transcript_id | "Novel_001439"; | exon_number | "1"; | gene_type | " |
| At_chr9 | Cufflinks | exon | 49274723 | 49275704 | . | + | . | gene_id | "XLOC_106467"; | transcript_id | "Novel_001439"; | exon_number | "2"; | gene_type | " |
| At_chr9 | Cufflinks | exon | 49302563 | 49303509 | . | + | . | gene_id | "XLOC_106477"; | transcript_id | "Novel_001440"; | exon_number | "1"; | gene_type | " |
| At_chr9 | Cufflinks | exon | 49422902 | 49423518 | . | + | . | gene_id | "XLOC_106495"; | transcript_id | "Novel_001441"; | exon_number | "1"; | gene_type | " |
| At_chr9 | Cufflinks | exon | 49426254 | 49426925 | . | + | . | gene_id | "XLOC_106495"; | transcript_id | "Novel_001441"; | exon_number | "2"; | gene_type | " |
| At_chr9 | Cufflinks | exon | 50636800 | 50637606 | . | + | . | gene_id | "XLOC_106661"; | transcript_id | "Novel_001442"; | exon_number | "1"; | gene_type | " |
| At_chr9 | Cufflinks | exon | 50837086 | 50837824 | . | + | . | gene_id | "XLOC_106697"; | transcript_id | "Novel_001443"; | exon_number | "1"; | gene_type | " |
| At_chr9 | Cufflinks | exon | 50838527 | 50838639 | . | + | . | gene_id | "XLOC_106697"; | transcript_id | "Novel_001443"; | exon_number | "2"; | gene_type | " |

|         |           |      |          |          |   |   |   |         |                |               |                 |             |      |           |   |
|---------|-----------|------|----------|----------|---|---|---|---------|----------------|---------------|-----------------|-------------|------|-----------|---|
| At_chr9 | Cufflinks | exon | 50838732 | 50838827 | . | + | . | gene_id | "XLOC_106697"; | transcript_id | "Novel_001443"; | exon_number | "3"; | gene_type | " |
| At_chr9 | Cufflinks | exon | 50838955 | 50839011 | . | + | . | gene_id | "XLOC_106697"; | transcript_id | "Novel_001443"; | exon_number | "4"; | gene_type | " |
| At_chr9 | Cufflinks | exon | 50839140 | 50839295 | . | + | . | gene_id | "XLOC_106697"; | transcript_id | "Novel_001443"; | exon_number | "5"; | gene_type | " |
| At_chr9 | Cufflinks | exon | 50839405 | 50839489 | . | + | . | gene_id | "XLOC_106697"; | transcript_id | "Novel_001443"; | exon_number | "6"; | gene_type | " |
| At_chr9 | Cufflinks | exon | 50839684 | 50839774 | . | + | . | gene_id | "XLOC_106697"; | transcript_id | "Novel_001443"; | exon_number | "7"; | gene_type | " |
| At_chr9 | Cufflinks | exon | 50839895 | 50840059 | . | + | . | gene_id | "XLOC_106697"; | transcript_id | "Novel_001443"; | exon_number | "8"; | gene_type | " |
| At_chr9 | Cufflinks | exon | 50840181 | 50840477 | . | + | . | gene_id | "XLOC_106697"; | transcript_id | "Novel_001443"; | exon_number | "9"; | gene_type | " |
| At_chr9 | Cufflinks | exon | 51759311 | 51759548 | . | + | . | gene_id | "XLOC_106830"; | transcript_id | "Novel_001444"; | exon_number | "1"; | gene_type | " |
| At_chr9 | Cufflinks | exon | 51760233 | 51760291 | . | + | . | gene_id | "XLOC_106830"; | transcript_id | "Novel_001444"; | exon_number | "2"; | gene_type | " |
| At_chr9 | Cufflinks | exon | 51760372 | 51761312 | . | + | . | gene_id | "XLOC_106830"; | transcript_id | "Novel_001444"; | exon_number | "3"; | gene_type | " |
| At_chr9 | Cufflinks | exon | 52557367 | 52557933 | . | + | . | gene_id | "XLOC_106965"; | transcript_id | "Novel_001445"; | exon_number | "1"; | gene_type | " |
| At_chr9 | Cufflinks | exon | 52558543 | 52558640 | . | + | . | gene_id | "XLOC_106965"; | transcript_id | "Novel_001445"; | exon_number | "2"; | gene_type | " |
| At_chr9 | Cufflinks | exon | 52558768 | 52558798 | . | + | . | gene_id | "XLOC_106965"; | transcript_id | "Novel_001445"; | exon_number | "3"; | gene_type | " |
| At_chr9 | Cufflinks | exon | 52559515 | 52559665 | . | + | . | gene_id | "XLOC_106965"; | transcript_id | "Novel_001445"; | exon_number | "4"; | gene_type | " |
| At_chr9 | Cufflinks | exon | 52557547 | 52557933 | . | + | . | gene_id | "XLOC_106965"; | transcript_id | "Novel_001446"; | exon_number | "1"; | gene_type | " |
| At_chr9 | Cufflinks | exon | 52558543 | 52558640 | . | + | . | gene_id | "XLOC_106965"; | transcript_id | "Novel_001446"; | exon_number | "2"; | gene_type | " |
| At_chr9 | Cufflinks | exon | 52558768 | 52558798 | . | + | . | gene_id | "XLOC_106965"; | transcript_id | "Novel_001446"; | exon_number | "3"; | gene_type | " |
| At_chr9 | Cufflinks | exon | 52559515 | 52559614 | . | + | . | gene_id | "XLOC_106965"; | transcript_id | "Novel_001446"; | exon_number | "4"; | gene_type | " |
| At_chr9 | Cufflinks | exon | 52560588 | 52560658 | . | + | . | gene_id | "XLOC_106965"; | transcript_id | "Novel_001446"; | exon_number | "5"; | gene_type | " |
| At_chr9 | Cufflinks | exon | 52560746 | 52560889 | . | + | . | gene_id | "XLOC_106965"; | transcript_id | "Novel_001446"; | exon_number | "6"; | gene_type | " |
| At_chr9 | Cufflinks | exon | 52561014 | 52561667 | . | + | . | gene_id | "XLOC_106965"; | transcript_id | "Novel_001446"; | exon_number | "7"; | gene_type | " |
| At_chr9 | Cufflinks | exon | 52557577 | 52557933 | . | + | . | gene_id | "XLOC_106965"; | transcript_id | "Novel_001447"; | exon_number | "1"; | gene_type | " |
| At_chr9 | Cufflinks | exon | 52558543 | 52558640 | . | + | . | gene_id | "XLOC_106965"; | transcript_id | "Novel_001447"; | exon_number | "2"; | gene_type | " |
| At_chr9 | Cufflinks | exon | 52558768 | 52558798 | . | + | . | gene_id | "XLOC_106965"; | transcript_id | "Novel_001447"; | exon_number | "3"; | gene_type | " |
| At_chr9 | Cufflinks | exon | 52559515 | 52559614 | . | + | . | gene_id | "XLOC_106965"; | transcript_id | "Novel_001447"; | exon_number | "4"; | gene_type | " |
| At_chr9 | Cufflinks | exon | 52560588 | 52560658 | . | + | . | gene_id | "XLOC_106965"; | transcript_id | "Novel_001447"; | exon_number | "5"; | gene_type | " |
| At_chr9 | Cufflinks | exon | 52560746 | 52561788 | . | + | . | gene_id | "XLOC_106965"; | transcript_id | "Novel_001447"; | exon_number | "6"; | gene_type | " |
| At_chr9 | Cufflinks | exon | 52559754 | 52560889 | . | + | . | gene_id | "XLOC_106965"; | transcript_id | "Novel_001448"; | exon_number | "1"; | gene_type | " |
| At_chr9 | Cufflinks | exon | 52561014 | 52561472 | . | + | . | gene_id | "XLOC_106965"; | transcript_id | "Novel_001448"; | exon_number | "2"; | gene_type | " |
| At_chr9 | Cufflinks | exon | 54443351 | 54443825 | . | + | . | gene_id | "XLOC_107337"; | transcript_id | "Novel_001449"; | exon_number | "1"; | gene_type | " |
| At_chr9 | Cufflinks | exon | 54443940 | 54444004 | . | + | . | gene_id | "XLOC_107337"; | transcript_id | "Novel_001449"; | exon_number | "2"; | gene_type | " |
| At_chr9 | Cufflinks | exon | 54444100 | 54444160 | . | + | . | gene_id | "XLOC_107337"; | transcript_id | "Novel_001449"; | exon_number | "3"; | gene_type | " |
| At_chr9 | Cufflinks | exon | 54444366 | 54444512 | . | + | . | gene_id | "XLOC_107337"; | transcript_id | "Novel_001449"; | exon_number | "4"; | gene_type | " |
| At_chr9 | Cufflinks | exon | 54444650 | 54444876 | . | + | . | gene_id | "XLOC_107337"; | transcript_id | "Novel_001449"; | exon_number | "5"; | gene_type | " |
| At_chr9 | Cufflinks | exon | 55456847 | 55457229 | . | + | . | gene_id | "XLOC_107524"; | transcript_id | "Novel_001450"; | exon_number | "1"; | gene_type | " |

|         |           |      |          |          |   |   |   |         |                |               |                 |             |      |           |   |
|---------|-----------|------|----------|----------|---|---|---|---------|----------------|---------------|-----------------|-------------|------|-----------|---|
| At_chr9 | Cufflinks | exon | 55457643 | 55457768 | . | + | . | gene_id | "XLOC_107524"; | transcript_id | "Novel_001450"; | exon_number | "2"; | gene_type | " |
| At_chr9 | Cufflinks | exon | 55457929 | 55457967 | . | + | . | gene_id | "XLOC_107524"; | transcript_id | "Novel_001450"; | exon_number | "3"; | gene_type | " |
| At_chr9 | Cufflinks | exon | 55458461 | 55459849 | . | + | . | gene_id | "XLOC_107524"; | transcript_id | "Novel_001450"; | exon_number | "4"; | gene_type | " |
| At_chr9 | Cufflinks | exon | 55522544 | 55522675 | . | + | . | gene_id | "XLOC_107531"; | transcript_id | "Novel_001451"; | exon_number | "1"; | gene_type | " |
| At_chr9 | Cufflinks | exon | 55524351 | 55524821 | . | + | . | gene_id | "XLOC_107531"; | transcript_id | "Novel_001451"; | exon_number | "2"; | gene_type | " |
| At_chr9 | Cufflinks | exon | 55524904 | 55525020 | . | + | . | gene_id | "XLOC_107531"; | transcript_id | "Novel_001451"; | exon_number | "3"; | gene_type | " |
| At_chr9 | Cufflinks | exon | 55525251 | 55525293 | . | + | . | gene_id | "XLOC_107531"; | transcript_id | "Novel_001451"; | exon_number | "4"; | gene_type | " |
| At_chr9 | Cufflinks | exon | 55902594 | 55902668 | . | + | . | gene_id | "XLOC_107581"; | transcript_id | "Novel_001452"; | exon_number | "1"; | gene_type | " |
| At_chr9 | Cufflinks | exon | 55902775 | 55902825 | . | + | . | gene_id | "XLOC_107581"; | transcript_id | "Novel_001452"; | exon_number | "2"; | gene_type | " |
| At_chr9 | Cufflinks | exon | 55902928 | 55903631 | . | + | . | gene_id | "XLOC_107581"; | transcript_id | "Novel_001452"; | exon_number | "3"; | gene_type | " |
| At_chr9 | Cufflinks | exon | 55983167 | 55983192 | . | + | . | gene_id | "XLOC_107603"; | transcript_id | "Novel_001453"; | exon_number | "1"; | gene_type | " |
| At_chr9 | Cufflinks | exon | 55983752 | 55983881 | . | + | . | gene_id | "XLOC_107603"; | transcript_id | "Novel_001453"; | exon_number | "2"; | gene_type | " |
| At_chr9 | Cufflinks | exon | 55984016 | 55984296 | . | + | . | gene_id | "XLOC_107603"; | transcript_id | "Novel_001453"; | exon_number | "3"; | gene_type | " |
| At_chr9 | Cufflinks | exon | 56232199 | 56232505 | . | + | . | gene_id | "XLOC_107640"; | transcript_id | "Novel_001454"; | exon_number | "1"; | gene_type | " |
| At_chr9 | Cufflinks | exon | 56232583 | 56233108 | . | + | . | gene_id | "XLOC_107640"; | transcript_id | "Novel_001454"; | exon_number | "2"; | gene_type | " |
| At_chr9 | Cufflinks | exon | 56338598 | 56338892 | . | + | . | gene_id | "XLOC_107657"; | transcript_id | "Novel_001455"; | exon_number | "1"; | gene_type | " |
| At_chr9 | Cufflinks | exon | 56339829 | 56339950 | . | + | . | gene_id | "XLOC_107657"; | transcript_id | "Novel_001455"; | exon_number | "2"; | gene_type | " |
| At_chr9 | Cufflinks | exon | 56349706 | 56350106 | . | + | . | gene_id | "XLOC_107659"; | transcript_id | "Novel_001456"; | exon_number | "1"; | gene_type | " |
| At_chr9 | Cufflinks | exon | 56352183 | 56352277 | . | + | . | gene_id | "XLOC_107659"; | transcript_id | "Novel_001456"; | exon_number | "2"; | gene_type | " |
| At_chr9 | Cufflinks | exon | 56349785 | 56350106 | . | + | . | gene_id | "XLOC_107659"; | transcript_id | "Novel_001457"; | exon_number | "1"; | gene_type | " |
| At_chr9 | Cufflinks | exon | 56351454 | 56351563 | . | + | . | gene_id | "XLOC_107659"; | transcript_id | "Novel_001457"; | exon_number | "2"; | gene_type | " |
| At_chr9 | Cufflinks | exon | 56430817 | 56431826 | . | + | . | gene_id | "XLOC_107668"; | transcript_id | "Novel_001458"; | exon_number | "1"; | gene_type | " |
| At_chr9 | Cufflinks | exon | 56432028 | 56432117 | . | + | . | gene_id | "XLOC_107668"; | transcript_id | "Novel_001458"; | exon_number | "2"; | gene_type | " |
| At_chr9 | Cufflinks | exon | 56432255 | 56432364 | . | + | . | gene_id | "XLOC_107668"; | transcript_id | "Novel_001458"; | exon_number | "3"; | gene_type | " |
| At_chr9 | Cufflinks | exon | 56432509 | 56433597 | . | + | . | gene_id | "XLOC_107668"; | transcript_id | "Novel_001458"; | exon_number | "4"; | gene_type | " |
| At_chr9 | Cufflinks | exon | 56433939 | 56433988 | . | + | . | gene_id | "XLOC_107668"; | transcript_id | "Novel_001458"; | exon_number | "5"; | gene_type | " |
| At_chr9 | Cufflinks | exon | 56434325 | 56434778 | . | + | . | gene_id | "XLOC_107668"; | transcript_id | "Novel_001458"; | exon_number | "6"; | gene_type | " |
| At_chr9 | Cufflinks | exon | 56430817 | 56432117 | . | + | . | gene_id | "XLOC_107668"; | transcript_id | "Novel_001459"; | exon_number | "1"; | gene_type | " |
| At_chr9 | Cufflinks | exon | 56432255 | 56432364 | . | + | . | gene_id | "XLOC_107668"; | transcript_id | "Novel_001459"; | exon_number | "2"; | gene_type | " |
| At_chr9 | Cufflinks | exon | 56432509 | 56432688 | . | + | . | gene_id | "XLOC_107668"; | transcript_id | "Novel_001459"; | exon_number | "3"; | gene_type | " |
| At_chr9 | Cufflinks | exon | 56433463 | 56433597 | . | + | . | gene_id | "XLOC_107668"; | transcript_id | "Novel_001459"; | exon_number | "4"; | gene_type | " |
| At_chr9 | Cufflinks | exon | 56433939 | 56433988 | . | + | . | gene_id | "XLOC_107668"; | transcript_id | "Novel_001459"; | exon_number | "5"; | gene_type | " |
| At_chr9 | Cufflinks | exon | 56434325 | 56434778 | . | + | . | gene_id | "XLOC_107668"; | transcript_id | "Novel_001459"; | exon_number | "6"; | gene_type | " |
| At_chr9 | Cufflinks | exon | 56430817 | 56431826 | . | + | . | gene_id | "XLOC_107668"; | transcript_id | "Novel_001460"; | exon_number | "1"; | gene_type | " |
| At_chr9 | Cufflinks | exon | 56432028 | 56432117 | . | + | . | gene_id | "XLOC_107668"; | transcript_id | "Novel_001460"; | exon_number | "2"; | gene_type | " |



|         |           |      |          |          |   |   |   |         |                |               |                 |             |      |           |   |
|---------|-----------|------|----------|----------|---|---|---|---------|----------------|---------------|-----------------|-------------|------|-----------|---|
| At_chr9 | Cufflinks | exon | 56432255 | 56432364 | . | + | . | gene_id | "XLOC_107668"; | transcript_id | "Novel_001460"; | exon_number | "3"; | gene_type | " |
| At_chr9 | Cufflinks | exon | 56432509 | 56432688 | . | + | . | gene_id | "XLOC_107668"; | transcript_id | "Novel_001460"; | exon_number | "4"; | gene_type | " |
| At_chr9 | Cufflinks | exon | 56433463 | 56433597 | . | + | . | gene_id | "XLOC_107668"; | transcript_id | "Novel_001460"; | exon_number | "5"; | gene_type | " |
| At_chr9 | Cufflinks | exon | 56433939 | 56433988 | . | + | . | gene_id | "XLOC_107668"; | transcript_id | "Novel_001460"; | exon_number | "6"; | gene_type | " |
| At_chr9 | Cufflinks | exon | 56434325 | 56434782 | . | + | . | gene_id | "XLOC_107668"; | transcript_id | "Novel_001460"; | exon_number | "7"; | gene_type | " |
| At_chr9 | Cufflinks | exon | 56583259 | 56583488 | . | + | . | gene_id | "XLOC_107680"; | transcript_id | "Novel_001461"; | exon_number | "1"; | gene_type | " |
| At_chr9 | Cufflinks | exon | 56584035 | 56585000 | . | + | . | gene_id | "XLOC_107680"; | transcript_id | "Novel_001461"; | exon_number | "2"; | gene_type | " |
| At_chr9 | Cufflinks | exon | 56583259 | 56583555 | . | + | . | gene_id | "XLOC_107680"; | transcript_id | "Novel_001462"; | exon_number | "1"; | gene_type | " |
| At_chr9 | Cufflinks | exon | 56584035 | 56585000 | . | + | . | gene_id | "XLOC_107680"; | transcript_id | "Novel_001462"; | exon_number | "2"; | gene_type | " |
| At_chr9 | Cufflinks | exon | 56585164 | 56585534 | . | + | . | gene_id | "XLOC_107681"; | transcript_id | "Novel_001463"; | exon_number | "1"; | gene_type | " |
| At_chr9 | Cufflinks | exon | 56585626 | 56585789 | . | + | . | gene_id | "XLOC_107681"; | transcript_id | "Novel_001463"; | exon_number | "2"; | gene_type | " |
| At_chr9 | Cufflinks | exon | 56587898 | 56588854 | . | + | . | gene_id | "XLOC_107681"; | transcript_id | "Novel_001463"; | exon_number | "3"; | gene_type | " |
| At_chr9 | Cufflinks | exon | 56719098 | 56720439 | . | + | . | gene_id | "XLOC_107681"; | transcript_id | "Novel_001464"; | exon_number | "1"; | gene_type | " |
| At_chr9 | Cufflinks | exon | 56720531 | 56723545 | . | + | . | gene_id | "XLOC_107681"; | transcript_id | "Novel_001464"; | exon_number | "2"; | gene_type | " |
| At_chr9 | Cufflinks | exon | 56825052 | 56827724 | . | + | . | gene_id | "XLOC_107725"; | transcript_id | "Novel_001465"; | exon_number | "1"; | gene_type | " |
| At_chr9 | Cufflinks | exon | 56846702 | 56849390 | . | + | . | gene_id | "XLOC_107726"; | transcript_id | "Novel_001466"; | exon_number | "1"; | gene_type | " |
| At_chr9 | Cufflinks | exon | 58309364 | 58309468 | . | + | . | gene_id | "XLOC_107936"; | transcript_id | "Novel_001467"; | exon_number | "1"; | gene_type | " |
| At_chr9 | Cufflinks | exon | 58309604 | 58310903 | . | + | . | gene_id | "XLOC_107936"; | transcript_id | "Novel_001467"; | exon_number | "2"; | gene_type | " |
| At_chr9 | Cufflinks | exon | 58311010 | 58311090 | . | + | . | gene_id | "XLOC_107936"; | transcript_id | "Novel_001467"; | exon_number | "3"; | gene_type | " |
| At_chr9 | Cufflinks | exon | 58311200 | 58311234 | . | + | . | gene_id | "XLOC_107936"; | transcript_id | "Novel_001467"; | exon_number | "4"; | gene_type | " |
| At_chr9 | Cufflinks | exon | 58309450 | 58309468 | . | + | . | gene_id | "XLOC_107936"; | transcript_id | "Novel_001468"; | exon_number | "1"; | gene_type | " |
| At_chr9 | Cufflinks | exon | 58309604 | 58313309 | . | + | . | gene_id | "XLOC_107936"; | transcript_id | "Novel_001468"; | exon_number | "2"; | gene_type | " |
| At_chr9 | Cufflinks | exon | 59015952 | 59016132 | . | + | . | gene_id | "XLOC_108040"; | transcript_id | "Novel_001469"; | exon_number | "1"; | gene_type | " |
| At_chr9 | Cufflinks | exon | 59016445 | 59017450 | . | + | . | gene_id | "XLOC_108040"; | transcript_id | "Novel_001469"; | exon_number | "2"; | gene_type | " |
| At_chr9 | Cufflinks | exon | 59015953 | 59016040 | . | + | . | gene_id | "XLOC_108040"; | transcript_id | "Novel_001470"; | exon_number | "1"; | gene_type | " |
| At_chr9 | Cufflinks | exon | 59016445 | 59017133 | . | + | . | gene_id | "XLOC_108040"; | transcript_id | "Novel_001470"; | exon_number | "2"; | gene_type | " |
| At_chr9 | Cufflinks | exon | 59689287 | 59689670 | . | + | . | gene_id | "XLOC_108146"; | transcript_id | "Novel_001471"; | exon_number | "1"; | gene_type | " |
| At_chr9 | Cufflinks | exon | 59689814 | 59689966 | . | + | . | gene_id | "XLOC_108146"; | transcript_id | "Novel_001471"; | exon_number | "2"; | gene_type | " |
| At_chr9 | Cufflinks | exon | 59690230 | 59690375 | . | + | . | gene_id | "XLOC_108146"; | transcript_id | "Novel_001471"; | exon_number | "3"; | gene_type | " |
| At_chr9 | Cufflinks | exon | 59691121 | 59691204 | . | + | . | gene_id | "XLOC_108146"; | transcript_id | "Novel_001471"; | exon_number | "4"; | gene_type | " |
| At_chr9 | Cufflinks | exon | 59694252 | 59694393 | . | + | . | gene_id | "XLOC_108146"; | transcript_id | "Novel_001471"; | exon_number | "5"; | gene_type | " |
| At_chr9 | Cufflinks | exon | 59694594 | 59694894 | . | + | . | gene_id | "XLOC_108146"; | transcript_id | "Novel_001471"; | exon_number | "6"; | gene_type | " |
| At_chr9 | Cufflinks | exon | 59689287 | 59689670 | . | + | . | gene_id | "XLOC_108146"; | transcript_id | "Novel_001472"; | exon_number | "1"; | gene_type | " |
| At_chr9 | Cufflinks | exon | 59689814 | 59690375 | . | + | . | gene_id | "XLOC_108146"; | transcript_id | "Novel_001472"; | exon_number | "2"; | gene_type | " |
| At_chr9 | Cufflinks | exon | 59691121 | 59691204 | . | + | . | gene_id | "XLOC_108146"; | transcript_id | "Novel_001472"; | exon_number | "3"; | gene_type | " |

|         |           |      |          |          |   |   |   |         |                |               |                 |             |      |           |   |
|---------|-----------|------|----------|----------|---|---|---|---------|----------------|---------------|-----------------|-------------|------|-----------|---|
| At_chr9 | Cufflinks | exon | 59694252 | 59694393 | . | + | . | gene_id | "XLOC_108146"; | transcript_id | "Novel_001472"; | exon_number | "4"; | gene_type | " |
| At_chr9 | Cufflinks | exon | 59694594 | 59694894 | . | + | . | gene_id | "XLOC_108146"; | transcript_id | "Novel_001472"; | exon_number | "5"; | gene_type | " |
| At_chr9 | Cufflinks | exon | 59809564 | 59809745 | . | + | . | gene_id | "XLOC_108157"; | transcript_id | "Novel_001473"; | exon_number | "1"; | gene_type | " |
| At_chr9 | Cufflinks | exon | 59810095 | 59810235 | . | + | . | gene_id | "XLOC_108157"; | transcript_id | "Novel_001473"; | exon_number | "2"; | gene_type | " |
| At_chr9 | Cufflinks | exon | 59810379 | 59810918 | . | + | . | gene_id | "XLOC_108157"; | transcript_id | "Novel_001473"; | exon_number | "3"; | gene_type | " |
| At_chr9 | Cufflinks | exon | 59985740 | 59986218 | . | + | . | gene_id | "XLOC_108173"; | transcript_id | "Novel_001474"; | exon_number | "1"; | gene_type | " |
| At_chr9 | Cufflinks | exon | 59986349 | 59986581 | . | + | . | gene_id | "XLOC_108173"; | transcript_id | "Novel_001474"; | exon_number | "2"; | gene_type | " |
| At_chr9 | Cufflinks | exon | 59986665 | 59986715 | . | + | . | gene_id | "XLOC_108173"; | transcript_id | "Novel_001474"; | exon_number | "3"; | gene_type | " |
| At_chr9 | Cufflinks | exon | 59986881 | 59987516 | . | + | . | gene_id | "XLOC_108173"; | transcript_id | "Novel_001474"; | exon_number | "4"; | gene_type | " |
| At_chr9 | Cufflinks | exon | 59988574 | 59988854 | . | + | . | gene_id | "XLOC_108174"; | transcript_id | "Novel_001475"; | exon_number | "1"; | gene_type | " |
| At_chr9 | Cufflinks | exon | 59989367 | 59989457 | . | + | . | gene_id | "XLOC_108174"; | transcript_id | "Novel_001475"; | exon_number | "2"; | gene_type | " |
| At_chr9 | Cufflinks | exon | 59989651 | 59989960 | . | + | . | gene_id | "XLOC_108174"; | transcript_id | "Novel_001475"; | exon_number | "3"; | gene_type | " |
| At_chr9 | Cufflinks | exon | 59990099 | 59990175 | . | + | . | gene_id | "XLOC_108174"; | transcript_id | "Novel_001475"; | exon_number | "4"; | gene_type | " |
| At_chr9 | Cufflinks | exon | 59991195 | 59994705 | . | + | . | gene_id | "XLOC_108174"; | transcript_id | "Novel_001476"; | exon_number | "1"; | gene_type | " |
| At_chr9 | Cufflinks | exon | 59994787 | 59995788 | . | + | . | gene_id | "XLOC_108174"; | transcript_id | "Novel_001476"; | exon_number | "2"; | gene_type | " |
| At_chr9 | Cufflinks | exon | 59996095 | 59996115 | . | + | . | gene_id | "XLOC_108174"; | transcript_id | "Novel_001476"; | exon_number | "3"; | gene_type | " |
| At_chr9 | Cufflinks | exon | 61548162 | 61548500 | . | + | . | gene_id | "XLOC_108297"; | transcript_id | "Novel_001477"; | exon_number | "1"; | gene_type | " |
| At_chr9 | Cufflinks | exon | 61549833 | 61550051 | . | + | . | gene_id | "XLOC_108297"; | transcript_id | "Novel_001477"; | exon_number | "2"; | gene_type | " |
| At_chr9 | Cufflinks | exon | 62041604 | 62041708 | . | + | . | gene_id | "XLOC_108350"; | transcript_id | "Novel_001478"; | exon_number | "1"; | gene_type | " |
| At_chr9 | Cufflinks | exon | 62043881 | 62046248 | . | + | . | gene_id | "XLOC_108350"; | transcript_id | "Novel_001478"; | exon_number | "2"; | gene_type | " |
| At_chr9 | Cufflinks | exon | 62042567 | 62042909 | . | + | . | gene_id | "XLOC_108350"; | transcript_id | "Novel_001479"; | exon_number | "1"; | gene_type | " |
| At_chr9 | Cufflinks | exon | 62043881 | 62046163 | . | + | . | gene_id | "XLOC_108350"; | transcript_id | "Novel_001479"; | exon_number | "2"; | gene_type | " |
| At_chr9 | Cufflinks | exon | 62134219 | 62134414 | . | + | . | gene_id | "XLOC_108370"; | transcript_id | "Novel_001480"; | exon_number | "1"; | gene_type | " |
| At_chr9 | Cufflinks | exon | 62134532 | 62134569 | . | + | . | gene_id | "XLOC_108370"; | transcript_id | "Novel_001480"; | exon_number | "2"; | gene_type | " |
| At_chr9 | Cufflinks | exon | 62135148 | 62135245 | . | + | . | gene_id | "XLOC_108370"; | transcript_id | "Novel_001480"; | exon_number | "3"; | gene_type | " |
| At_chr9 | Cufflinks | exon | 62135422 | 62137608 | . | + | . | gene_id | "XLOC_108370"; | transcript_id | "Novel_001480"; | exon_number | "4"; | gene_type | " |
| At_chr9 | Cufflinks | exon | 62134219 | 62134414 | . | + | . | gene_id | "XLOC_108370"; | transcript_id | "Novel_001481"; | exon_number | "1"; | gene_type | " |
| At_chr9 | Cufflinks | exon | 62134532 | 62134569 | . | + | . | gene_id | "XLOC_108370"; | transcript_id | "Novel_001481"; | exon_number | "2"; | gene_type | " |
| At_chr9 | Cufflinks | exon | 62135148 | 62135245 | . | + | . | gene_id | "XLOC_108370"; | transcript_id | "Novel_001481"; | exon_number | "3"; | gene_type | " |
| At_chr9 | Cufflinks | exon | 62135422 | 62135477 | . | + | . | gene_id | "XLOC_108370"; | transcript_id | "Novel_001481"; | exon_number | "4"; | gene_type | " |
| At_chr9 | Cufflinks | exon | 62136318 | 62137681 | . | + | . | gene_id | "XLOC_108370"; | transcript_id | "Novel_001481"; | exon_number | "5"; | gene_type | " |
| At_chr9 | Cufflinks | exon | 62669491 | 62669727 | . | + | . | gene_id | "XLOC_108440"; | transcript_id | "Novel_001482"; | exon_number | "1"; | gene_type | " |
| At_chr9 | Cufflinks | exon | 62670860 | 62671119 | . | + | . | gene_id | "XLOC_108440"; | transcript_id | "Novel_001482"; | exon_number | "2"; | gene_type | " |
| At_chr9 | Cufflinks | exon | 62671564 | 62672253 | . | + | . | gene_id | "XLOC_108440"; | transcript_id | "Novel_001482"; | exon_number | "3"; | gene_type | " |
| At_chr9 | Cufflinks | exon | 62674713 | 62674745 | . | + | . | gene_id | "XLOC_108443"; | transcript_id | "Novel_001483"; | exon_number | "1"; | gene_type | " |

|         |           |      |          |          |   |   |   |         |                |               |                 |             |      |           |   |
|---------|-----------|------|----------|----------|---|---|---|---------|----------------|---------------|-----------------|-------------|------|-----------|---|
| At_chr9 | Cufflinks | exon | 62674826 | 62674930 | . | + | . | gene_id | "XLOC_108443"; | transcript_id | "Novel_001483"; | exon_number | "2"; | gene_type | " |
| At_chr9 | Cufflinks | exon | 62676136 | 62676395 | . | + | . | gene_id | "XLOC_108443"; | transcript_id | "Novel_001483"; | exon_number | "3"; | gene_type | " |
| At_chr9 | Cufflinks | exon | 62676847 | 62677299 | . | + | . | gene_id | "XLOC_108443"; | transcript_id | "Novel_001483"; | exon_number | "4"; | gene_type | " |
| At_chr9 | Cufflinks | exon | 62674735 | 62674930 | . | + | . | gene_id | "XLOC_108443"; | transcript_id | "Novel_001484"; | exon_number | "1"; | gene_type | " |
| At_chr9 | Cufflinks | exon | 62676136 | 62676395 | . | + | . | gene_id | "XLOC_108443"; | transcript_id | "Novel_001484"; | exon_number | "2"; | gene_type | " |
| At_chr9 | Cufflinks | exon | 62676847 | 62677303 | . | + | . | gene_id | "XLOC_108443"; | transcript_id | "Novel_001484"; | exon_number | "3"; | gene_type | " |
| At_chr9 | Cufflinks | exon | 64325722 | 64325878 | . | + | . | gene_id | "XLOC_108628"; | transcript_id | "Novel_001485"; | exon_number | "1"; | gene_type | " |
| At_chr9 | Cufflinks | exon | 64326164 | 64327035 | . | + | . | gene_id | "XLOC_108628"; | transcript_id | "Novel_001485"; | exon_number | "2"; | gene_type | " |
| At_chr9 | Cufflinks | exon | 67054955 | 67055161 | . | + | . | gene_id | "XLOC_108839"; | transcript_id | "Novel_001486"; | exon_number | "1"; | gene_type | " |
| At_chr9 | Cufflinks | exon | 67225642 | 67225719 | . | + | . | gene_id | "XLOC_108859"; | transcript_id | "Novel_001487"; | exon_number | "1"; | gene_type | " |
| At_chr9 | Cufflinks | exon | 67225804 | 67225858 | . | + | . | gene_id | "XLOC_108859"; | transcript_id | "Novel_001487"; | exon_number | "2"; | gene_type | " |
| At_chr9 | Cufflinks | exon | 67225937 | 67225985 | . | + | . | gene_id | "XLOC_108859"; | transcript_id | "Novel_001487"; | exon_number | "3"; | gene_type | " |
| At_chr9 | Cufflinks | exon | 67226125 | 67226589 | . | + | . | gene_id | "XLOC_108859"; | transcript_id | "Novel_001487"; | exon_number | "4"; | gene_type | " |
| At_chr9 | Cufflinks | exon | 72069682 | 72069952 | . | + | . | gene_id | "XLOC_109099"; | transcript_id | "Novel_001488"; | exon_number | "1"; | gene_type | " |
| At_chr9 | Cufflinks | exon | 72071303 | 72072008 | . | + | . | gene_id | "XLOC_109099"; | transcript_id | "Novel_001488"; | exon_number | "2"; | gene_type | " |
| At_chr9 | Cufflinks | exon | 80414411 | 80414574 | . | + | . | gene_id | "XLOC_109471"; | transcript_id | "Novel_001489"; | exon_number | "1"; | gene_type | " |
| At_chr9 | Cufflinks | exon | 80417928 | 80420671 | . | + | . | gene_id | "XLOC_109471"; | transcript_id | "Novel_001489"; | exon_number | "2"; | gene_type | " |
| At_chr9 | Cufflinks | exon | 80420464 | 80421013 | . | + | . | gene_id | "XLOC_109471"; | transcript_id | "Novel_001490"; | exon_number | "1"; | gene_type | " |
| At_chr9 | Cufflinks | exon | 80423573 | 80425235 | . | + | . | gene_id | "XLOC_109471"; | transcript_id | "Novel_001490"; | exon_number | "2"; | gene_type | " |
| At_chr9 | Cufflinks | exon | 80444066 | 80445377 | . | + | . | gene_id | "XLOC_109476"; | transcript_id | "Novel_001491"; | exon_number | "1"; | gene_type | " |
| At_chr9 | Cufflinks | exon | 80446328 | 80448129 | . | + | . | gene_id | "XLOC_109476"; | transcript_id | "Novel_001491"; | exon_number | "2"; | gene_type | " |
| At_chr9 | Cufflinks | exon | 83061234 | 83061443 | . | + | . | gene_id | "XLOC_109601"; | transcript_id | "Novel_001492"; | exon_number | "1"; | gene_type | " |
| At_chr9 | Cufflinks | exon | 83999270 | 83999409 | . | + | . | gene_id | "XLOC_109704"; | transcript_id | "Novel_001493"; | exon_number | "1"; | gene_type | " |
| At_chr9 | Cufflinks | exon | 84000301 | 84000453 | . | + | . | gene_id | "XLOC_109704"; | transcript_id | "Novel_001493"; | exon_number | "2"; | gene_type | " |
| At_chr9 | Cufflinks | exon | 84001190 | 84001678 | . | + | . | gene_id | "XLOC_109704"; | transcript_id | "Novel_001493"; | exon_number | "3"; | gene_type | " |
| At_chr9 | Cufflinks | exon | 84449676 | 84449951 | . | + | . | gene_id | "XLOC_109792"; | transcript_id | "Novel_001494"; | exon_number | "1"; | gene_type | " |
| At_chr9 | Cufflinks | exon | 84450777 | 84450919 | . | + | . | gene_id | "XLOC_109792"; | transcript_id | "Novel_001494"; | exon_number | "2"; | gene_type | " |
| At_chr9 | Cufflinks | exon | 84451009 | 84451128 | . | + | . | gene_id | "XLOC_109792"; | transcript_id | "Novel_001494"; | exon_number | "3"; | gene_type | " |
| At_chr9 | Cufflinks | exon | 84451219 | 84451747 | . | + | . | gene_id | "XLOC_109792"; | transcript_id | "Novel_001494"; | exon_number | "4"; | gene_type | " |
| At_chr9 | Cufflinks | exon | 85196482 | 85196772 | . | + | . | gene_id | "XLOC_109953"; | transcript_id | "Novel_001495"; | exon_number | "1"; | gene_type | " |
| At_chr9 | Cufflinks | exon | 85459446 | 85459651 | . | + | . | gene_id | "XLOC_109982"; | transcript_id | "Novel_001496"; | exon_number | "1"; | gene_type | " |
| At_chr9 | Cufflinks | exon | 86694280 | 86694639 | . | + | . | gene_id | "XLOC_110060"; | transcript_id | "Novel_001497"; | exon_number | "1"; | gene_type | " |
| At_chr9 | Cufflinks | exon | 86695241 | 86695350 | . | + | . | gene_id | "XLOC_110060"; | transcript_id | "Novel_001497"; | exon_number | "2"; | gene_type | " |
| At_chr9 | Cufflinks | exon | 86695411 | 86696554 | . | + | . | gene_id | "XLOC_110060"; | transcript_id | "Novel_001497"; | exon_number | "3"; | gene_type | " |
| At_chr9 | Cufflinks | exon | 86694280 | 86695350 | . | + | . | gene_id | "XLOC_110060"; | transcript_id | "Novel_001498"; | exon_number | "1"; | gene_type | " |

|         |           |      |          |          |   |   |   |         |                |               |                 |             |       |           |   |
|---------|-----------|------|----------|----------|---|---|---|---------|----------------|---------------|-----------------|-------------|-------|-----------|---|
| At_chr9 | Cufflinks | exon | 86695411 | 86696554 | . | + | . | gene_id | "XLOC_110060"; | transcript_id | "Novel_001498"; | exon_number | "2";  | gene_type | " |
| At_chr9 | Cufflinks | exon | 86694280 | 86695350 | . | + | . | gene_id | "XLOC_110060"; | transcript_id | "Novel_001499"; | exon_number | "1";  | gene_type | " |
| At_chr9 | Cufflinks | exon | 86695411 | 86695548 | . | + | . | gene_id | "XLOC_110060"; | transcript_id | "Novel_001499"; | exon_number | "2";  | gene_type | " |
| At_chr9 | Cufflinks | exon | 86695663 | 86696554 | . | + | . | gene_id | "XLOC_110060"; | transcript_id | "Novel_001499"; | exon_number | "3";  | gene_type | " |
| At_chr9 | Cufflinks | exon | 86694290 | 86694639 | . | + | . | gene_id | "XLOC_110060"; | transcript_id | "Novel_001500"; | exon_number | "1";  | gene_type | " |
| At_chr9 | Cufflinks | exon | 86695241 | 86695350 | . | + | . | gene_id | "XLOC_110060"; | transcript_id | "Novel_001500"; | exon_number | "2";  | gene_type | " |
| At_chr9 | Cufflinks | exon | 86695411 | 86695548 | . | + | . | gene_id | "XLOC_110060"; | transcript_id | "Novel_001500"; | exon_number | "3";  | gene_type | " |
| At_chr9 | Cufflinks | exon | 86695663 | 86696555 | . | + | . | gene_id | "XLOC_110060"; | transcript_id | "Novel_001500"; | exon_number | "4";  | gene_type | " |
| At_chr9 | Cufflinks | exon | 89184241 | 89184558 | . | + | . | gene_id | "XLOC_110143"; | transcript_id | "Novel_001501"; | exon_number | "1";  | gene_type | " |
| At_chr9 | Cufflinks | exon | 89184704 | 89184800 | . | + | . | gene_id | "XLOC_110143"; | transcript_id | "Novel_001501"; | exon_number | "2";  | gene_type | " |
| At_chr9 | Cufflinks | exon | 89184909 | 89185027 | . | + | . | gene_id | "XLOC_110143"; | transcript_id | "Novel_001501"; | exon_number | "3";  | gene_type | " |
| At_chr9 | Cufflinks | exon | 89185581 | 89185748 | . | + | . | gene_id | "XLOC_110143"; | transcript_id | "Novel_001501"; | exon_number | "4";  | gene_type | " |
| At_chr9 | Cufflinks | exon | 89186359 | 89186487 | . | + | . | gene_id | "XLOC_110143"; | transcript_id | "Novel_001501"; | exon_number | "5";  | gene_type | " |
| At_chr9 | Cufflinks | exon | 89187013 | 89187073 | . | + | . | gene_id | "XLOC_110143"; | transcript_id | "Novel_001501"; | exon_number | "6";  | gene_type | " |
| At_chr9 | Cufflinks | exon | 89187576 | 89187679 | . | + | . | gene_id | "XLOC_110143"; | transcript_id | "Novel_001501"; | exon_number | "7";  | gene_type | " |
| At_chr9 | Cufflinks | exon | 89187825 | 89187908 | . | + | . | gene_id | "XLOC_110143"; | transcript_id | "Novel_001501"; | exon_number | "8";  | gene_type | " |
| At_chr9 | Cufflinks | exon | 89188168 | 89188274 | . | + | . | gene_id | "XLOC_110143"; | transcript_id | "Novel_001501"; | exon_number | "9";  | gene_type | " |
| At_chr9 | Cufflinks | exon | 89188875 | 89189251 | . | + | . | gene_id | "XLOC_110143"; | transcript_id | "Novel_001501"; | exon_number | "10"; | gene_type | " |
| At_chr9 | Cufflinks | exon | 89189471 | 89189514 | . | + | . | gene_id | "XLOC_110143"; | transcript_id | "Novel_001502"; | exon_number | "1";  | gene_type | " |
| At_chr9 | Cufflinks | exon | 89189740 | 89189805 | . | + | . | gene_id | "XLOC_110143"; | transcript_id | "Novel_001502"; | exon_number | "2";  | gene_type | " |
| At_chr9 | Cufflinks | exon | 89190222 | 89190294 | . | + | . | gene_id | "XLOC_110143"; | transcript_id | "Novel_001502"; | exon_number | "3";  | gene_type | " |
| At_chr9 | Cufflinks | exon | 89190392 | 89190478 | . | + | . | gene_id | "XLOC_110143"; | transcript_id | "Novel_001502"; | exon_number | "4";  | gene_type | " |
| At_chr9 | Cufflinks | exon | 89190788 | 89190842 | . | + | . | gene_id | "XLOC_110143"; | transcript_id | "Novel_001502"; | exon_number | "5";  | gene_type | " |
| At_chr9 | Cufflinks | exon | 89190934 | 89191370 | . | + | . | gene_id | "XLOC_110143"; | transcript_id | "Novel_001502"; | exon_number | "6";  | gene_type | " |
| At_chr9 | Cufflinks | exon | 89347791 | 89347948 | . | + | . | gene_id | "XLOC_110157"; | transcript_id | "Novel_001503"; | exon_number | "1";  | gene_type | " |
| At_chr9 | Cufflinks | exon | 89348114 | 89348235 | . | + | . | gene_id | "XLOC_110157"; | transcript_id | "Novel_001503"; | exon_number | "2";  | gene_type | " |
| At_chr9 | Cufflinks | exon | 89348368 | 89348408 | . | + | . | gene_id | "XLOC_110157"; | transcript_id | "Novel_001503"; | exon_number | "3";  | gene_type | " |
| At_chr9 | Cufflinks | exon | 89348496 | 89348594 | . | + | . | gene_id | "XLOC_110157"; | transcript_id | "Novel_001503"; | exon_number | "4";  | gene_type | " |
| At_chr9 | Cufflinks | exon | 89349286 | 89349382 | . | + | . | gene_id | "XLOC_110157"; | transcript_id | "Novel_001503"; | exon_number | "5";  | gene_type | " |
| At_chr9 | Cufflinks | exon | 89983864 | 89984208 | . | + | . | gene_id | "XLOC_110198"; | transcript_id | "Novel_001504"; | exon_number | "1";  | gene_type | " |
| At_chr9 | Cufflinks | exon | 89985173 | 89986414 | . | + | . | gene_id | "XLOC_110198"; | transcript_id | "Novel_001504"; | exon_number | "2";  | gene_type | " |
| At_chr9 | Cufflinks | exon | 1612032  | 1613414  | . | - | . | gene_id | "XLOC_110439"; | transcript_id | "Novel_001505"; | exon_number | "1";  | gene_type | " |
| At_chr9 | Cufflinks | exon | 1614853  | 1614977  | . | - | . | gene_id | "XLOC_110439"; | transcript_id | "Novel_001505"; | exon_number | "2";  | gene_type | " |
| At_chr9 | Cufflinks | exon | 1612553  | 1613388  | . | - | . | gene_id | "XLOC_110439"; | transcript_id | "Novel_001506"; | exon_number | "1";  | gene_type | " |
| At_chr9 | Cufflinks | exon | 1614853  | 1614912  | . | - | . | gene_id | "XLOC_110439"; | transcript_id | "Novel_001506"; | exon_number | "2";  | gene_type | " |



|         |           |      |          |          |   |   |   |         |                |               |                 |             |       |           |   |
|---------|-----------|------|----------|----------|---|---|---|---------|----------------|---------------|-----------------|-------------|-------|-----------|---|
| At_chr9 | Cufflinks | exon | 28939177 | 28939225 | . | - | . | gene_id | "XLOC_111738"; | transcript_id | "Novel_001512"; | exon_number | "9";  | gene_type | " |
| At_chr9 | Cufflinks | exon | 28939312 | 28939633 | . | - | . | gene_id | "XLOC_111738"; | transcript_id | "Novel_001512"; | exon_number | "10"; | gene_type | " |
| At_chr9 | Cufflinks | exon | 28939710 | 28940327 | . | - | . | gene_id | "XLOC_111738"; | transcript_id | "Novel_001512"; | exon_number | "11"; | gene_type | " |
| At_chr9 | Cufflinks | exon | 28936950 | 28937315 | . | - | . | gene_id | "XLOC_111738"; | transcript_id | "Novel_001513"; | exon_number | "1";  | gene_type | " |
| At_chr9 | Cufflinks | exon | 28937397 | 28937825 | . | - | . | gene_id | "XLOC_111738"; | transcript_id | "Novel_001513"; | exon_number | "2";  | gene_type | " |
| At_chr9 | Cufflinks | exon | 28937926 | 28937970 | . | - | . | gene_id | "XLOC_111738"; | transcript_id | "Novel_001513"; | exon_number | "3";  | gene_type | " |
| At_chr9 | Cufflinks | exon | 28938050 | 28938154 | . | - | . | gene_id | "XLOC_111738"; | transcript_id | "Novel_001513"; | exon_number | "4";  | gene_type | " |
| At_chr9 | Cufflinks | exon | 28938255 | 28938513 | . | - | . | gene_id | "XLOC_111738"; | transcript_id | "Novel_001513"; | exon_number | "5";  | gene_type | " |
| At_chr9 | Cufflinks | exon | 28938601 | 28938721 | . | - | . | gene_id | "XLOC_111738"; | transcript_id | "Novel_001513"; | exon_number | "6";  | gene_type | " |
| At_chr9 | Cufflinks | exon | 28938802 | 28938931 | . | - | . | gene_id | "XLOC_111738"; | transcript_id | "Novel_001513"; | exon_number | "7";  | gene_type | " |
| At_chr9 | Cufflinks | exon | 28939023 | 28939094 | . | - | . | gene_id | "XLOC_111738"; | transcript_id | "Novel_001513"; | exon_number | "8";  | gene_type | " |
| At_chr9 | Cufflinks | exon | 28939177 | 28939225 | . | - | . | gene_id | "XLOC_111738"; | transcript_id | "Novel_001513"; | exon_number | "9";  | gene_type | " |
| At_chr9 | Cufflinks | exon | 28939312 | 28940333 | . | - | . | gene_id | "XLOC_111738"; | transcript_id | "Novel_001513"; | exon_number | "10"; | gene_type | " |
| At_chr9 | Cufflinks | exon | 28971914 | 28972262 | . | - | . | gene_id | "XLOC_111742"; | transcript_id | "Novel_001514"; | exon_number | "1";  | gene_type | " |
| At_chr9 | Cufflinks | exon | 28972389 | 28972805 | . | - | . | gene_id | "XLOC_111742"; | transcript_id | "Novel_001514"; | exon_number | "2";  | gene_type | " |
| At_chr9 | Cufflinks | exon | 29388171 | 29388537 | . | - | . | gene_id | "XLOC_111760"; | transcript_id | "Novel_001515"; | exon_number | "1";  | gene_type | " |
| At_chr9 | Cufflinks | exon | 29388945 | 29389007 | . | - | . | gene_id | "XLOC_111760"; | transcript_id | "Novel_001515"; | exon_number | "2";  | gene_type | " |
| At_chr9 | Cufflinks | exon | 29389211 | 29389254 | . | - | . | gene_id | "XLOC_111760"; | transcript_id | "Novel_001515"; | exon_number | "3";  | gene_type | " |
| At_chr9 | Cufflinks | exon | 29389469 | 29389614 | . | - | . | gene_id | "XLOC_111760"; | transcript_id | "Novel_001515"; | exon_number | "4";  | gene_type | " |
| At_chr9 | Cufflinks | exon | 29389858 | 29389877 | . | - | . | gene_id | "XLOC_111760"; | transcript_id | "Novel_001515"; | exon_number | "5";  | gene_type | " |
| At_chr9 | Cufflinks | exon | 29390358 | 29390493 | . | - | . | gene_id | "XLOC_111760"; | transcript_id | "Novel_001515"; | exon_number | "6";  | gene_type | " |
| At_chr9 | Cufflinks | exon | 29390835 | 29391054 | . | - | . | gene_id | "XLOC_111760"; | transcript_id | "Novel_001515"; | exon_number | "7";  | gene_type | " |
| At_chr9 | Cufflinks | exon | 29391475 | 29391655 | . | - | . | gene_id | "XLOC_111760"; | transcript_id | "Novel_001515"; | exon_number | "8";  | gene_type | " |
| At_chr9 | Cufflinks | exon | 29392150 | 29392173 | . | - | . | gene_id | "XLOC_111760"; | transcript_id | "Novel_001515"; | exon_number | "9";  | gene_type | " |
| At_chr9 | Cufflinks | exon | 29392333 | 29392929 | . | - | . | gene_id | "XLOC_111760"; | transcript_id | "Novel_001515"; | exon_number | "10"; | gene_type | " |
| At_chr9 | Cufflinks | exon | 29519393 | 29519861 | . | - | . | gene_id | "XLOC_111767"; | transcript_id | "Novel_001516"; | exon_number | "1";  | gene_type | " |
| At_chr9 | Cufflinks | exon | 29520491 | 29520547 | . | - | . | gene_id | "XLOC_111767"; | transcript_id | "Novel_001516"; | exon_number | "2";  | gene_type | " |
| At_chr9 | Cufflinks | exon | 29521237 | 29521312 | . | - | . | gene_id | "XLOC_111767"; | transcript_id | "Novel_001516"; | exon_number | "3";  | gene_type | " |
| At_chr9 | Cufflinks | exon | 29523875 | 29523940 | . | - | . | gene_id | "XLOC_111767"; | transcript_id | "Novel_001517"; | exon_number | "1";  | gene_type | " |
| At_chr9 | Cufflinks | exon | 29524542 | 29524777 | . | - | . | gene_id | "XLOC_111767"; | transcript_id | "Novel_001517"; | exon_number | "2";  | gene_type | " |
| At_chr9 | Cufflinks | exon | 29524858 | 29525240 | . | - | . | gene_id | "XLOC_111767"; | transcript_id | "Novel_001517"; | exon_number | "3";  | gene_type | " |
| At_chr9 | Cufflinks | exon | 29526220 | 29526253 | . | - | . | gene_id | "XLOC_111767"; | transcript_id | "Novel_001517"; | exon_number | "4";  | gene_type | " |
| At_chr9 | Cufflinks | exon | 29524689 | 29524777 | . | - | . | gene_id | "XLOC_111767"; | transcript_id | "Novel_001518"; | exon_number | "1";  | gene_type | " |
| At_chr9 | Cufflinks | exon | 29524858 | 29525522 | . | - | . | gene_id | "XLOC_111767"; | transcript_id | "Novel_001518"; | exon_number | "2";  | gene_type | " |
| At_chr9 | Cufflinks | exon | 31866197 | 31866757 | . | - | . | gene_id | "XLOC_111933"; | transcript_id | "Novel_001519"; | exon_number | "1";  | gene_type | " |

|         |           |      |          |          |   |   |   |         |                |               |                 |             |      |           |   |
|---------|-----------|------|----------|----------|---|---|---|---------|----------------|---------------|-----------------|-------------|------|-----------|---|
| At_chr9 | Cufflinks | exon | 31866993 | 31869417 | . | - | . | gene_id | "XLOC_111933"; | transcript_id | "Novel_001519"; | exon_number | "2"; | gene_type | " |
| At_chr9 | Cufflinks | exon | 32027028 | 32027260 | . | - | . | gene_id | "XLOC_111943"; | transcript_id | "Novel_001520"; | exon_number | "1"; | gene_type | " |
| At_chr9 | Cufflinks | exon | 32629015 | 32629106 | . | - | . | gene_id | "XLOC_111997"; | transcript_id | "Novel_001521"; | exon_number | "1"; | gene_type | " |
| At_chr9 | Cufflinks | exon | 32630662 | 32630732 | . | - | . | gene_id | "XLOC_111997"; | transcript_id | "Novel_001521"; | exon_number | "2"; | gene_type | " |
| At_chr9 | Cufflinks | exon | 32631451 | 32631530 | . | - | . | gene_id | "XLOC_111997"; | transcript_id | "Novel_001521"; | exon_number | "3"; | gene_type | " |
| At_chr9 | Cufflinks | exon | 32631769 | 32631943 | . | - | . | gene_id | "XLOC_111997"; | transcript_id | "Novel_001521"; | exon_number | "4"; | gene_type | " |
| At_chr9 | Cufflinks | exon | 32632161 | 32632451 | . | - | . | gene_id | "XLOC_111997"; | transcript_id | "Novel_001521"; | exon_number | "5"; | gene_type | " |
| At_chr9 | Cufflinks | exon | 32629019 | 32629112 | . | - | . | gene_id | "XLOC_111997"; | transcript_id | "Novel_001522"; | exon_number | "1"; | gene_type | " |
| At_chr9 | Cufflinks | exon | 32630662 | 32630732 | . | - | . | gene_id | "XLOC_111997"; | transcript_id | "Novel_001522"; | exon_number | "2"; | gene_type | " |
| At_chr9 | Cufflinks | exon | 32631451 | 32631530 | . | - | . | gene_id | "XLOC_111997"; | transcript_id | "Novel_001522"; | exon_number | "3"; | gene_type | " |
| At_chr9 | Cufflinks | exon | 32631769 | 32631943 | . | - | . | gene_id | "XLOC_111997"; | transcript_id | "Novel_001522"; | exon_number | "4"; | gene_type | " |
| At_chr9 | Cufflinks | exon | 32632161 | 32632456 | . | - | . | gene_id | "XLOC_111997"; | transcript_id | "Novel_001522"; | exon_number | "5"; | gene_type | " |
| At_chr9 | Cufflinks | exon | 32629019 | 32630732 | . | - | . | gene_id | "XLOC_111997"; | transcript_id | "Novel_001523"; | exon_number | "1"; | gene_type | " |
| At_chr9 | Cufflinks | exon | 32631451 | 32631530 | . | - | . | gene_id | "XLOC_111997"; | transcript_id | "Novel_001523"; | exon_number | "2"; | gene_type | " |
| At_chr9 | Cufflinks | exon | 32631769 | 32631943 | . | - | . | gene_id | "XLOC_111997"; | transcript_id | "Novel_001523"; | exon_number | "3"; | gene_type | " |
| At_chr9 | Cufflinks | exon | 32632161 | 32632456 | . | - | . | gene_id | "XLOC_111997"; | transcript_id | "Novel_001523"; | exon_number | "4"; | gene_type | " |
| At_chr9 | Cufflinks | exon | 32631106 | 32631530 | . | - | . | gene_id | "XLOC_111997"; | transcript_id | "Novel_001524"; | exon_number | "1"; | gene_type | " |
| At_chr9 | Cufflinks | exon | 32631769 | 32631943 | . | - | . | gene_id | "XLOC_111997"; | transcript_id | "Novel_001524"; | exon_number | "2"; | gene_type | " |
| At_chr9 | Cufflinks | exon | 32632161 | 32632449 | . | - | . | gene_id | "XLOC_111997"; | transcript_id | "Novel_001524"; | exon_number | "3"; | gene_type | " |
| At_chr9 | Cufflinks | exon | 33201837 | 33202391 | . | - | . | gene_id | "XLOC_112056"; | transcript_id | "Novel_001525"; | exon_number | "1"; | gene_type | " |
| At_chr9 | Cufflinks | exon | 33203271 | 33204487 | . | - | . | gene_id | "XLOC_112056"; | transcript_id | "Novel_001525"; | exon_number | "2"; | gene_type | " |
| At_chr9 | Cufflinks | exon | 33537125 | 33537425 | . | - | . | gene_id | "XLOC_112087"; | transcript_id | "Novel_001526"; | exon_number | "1"; | gene_type | " |
| At_chr9 | Cufflinks | exon | 33537781 | 33537838 | . | - | . | gene_id | "XLOC_112087"; | transcript_id | "Novel_001526"; | exon_number | "2"; | gene_type | " |
| At_chr9 | Cufflinks | exon | 33537186 | 33537425 | . | - | . | gene_id | "XLOC_112087"; | transcript_id | "Novel_001527"; | exon_number | "1"; | gene_type | " |
| At_chr9 | Cufflinks | exon | 33537692 | 33537809 | . | - | . | gene_id | "XLOC_112087"; | transcript_id | "Novel_001527"; | exon_number | "2"; | gene_type | " |
| At_chr9 | Cufflinks | exon | 35421478 | 35422147 | . | - | . | gene_id | "XLOC_112301"; | transcript_id | "Novel_001528"; | exon_number | "1"; | gene_type | " |
| At_chr9 | Cufflinks | exon | 35423257 | 35423758 | . | - | . | gene_id | "XLOC_112301"; | transcript_id | "Novel_001528"; | exon_number | "2"; | gene_type | " |
| At_chr9 | Cufflinks | exon | 36528429 | 36528531 | . | - | . | gene_id | "XLOC_112423"; | transcript_id | "Novel_001529"; | exon_number | "1"; | gene_type | " |
| At_chr9 | Cufflinks | exon | 36528601 | 36528862 | . | - | . | gene_id | "XLOC_112423"; | transcript_id | "Novel_001529"; | exon_number | "2"; | gene_type | " |
| At_chr9 | Cufflinks | exon | 37141943 | 37143283 | . | - | . | gene_id | "XLOC_112482"; | transcript_id | "Novel_001530"; | exon_number | "1"; | gene_type | " |
| At_chr9 | Cufflinks | exon | 37143371 | 37143797 | . | - | . | gene_id | "XLOC_112482"; | transcript_id | "Novel_001530"; | exon_number | "2"; | gene_type | " |
| At_chr9 | Cufflinks | exon | 37144101 | 37144143 | . | - | . | gene_id | "XLOC_112482"; | transcript_id | "Novel_001530"; | exon_number | "3"; | gene_type | " |
| At_chr9 | Cufflinks | exon | 37144711 | 37144855 | . | - | . | gene_id | "XLOC_112482"; | transcript_id | "Novel_001530"; | exon_number | "4"; | gene_type | " |
| At_chr9 | Cufflinks | exon | 37144946 | 37145054 | . | - | . | gene_id | "XLOC_112482"; | transcript_id | "Novel_001530"; | exon_number | "5"; | gene_type | " |
| At_chr9 | Cufflinks | exon | 37145146 | 37145282 | . | - | . | gene_id | "XLOC_112482"; | transcript_id | "Novel_001530"; | exon_number | "6"; | gene_type | " |

|         |           |      |          |          |   |   |   |         |                |               |                 |             |      |           |   |
|---------|-----------|------|----------|----------|---|---|---|---------|----------------|---------------|-----------------|-------------|------|-----------|---|
| At_chr9 | Cufflinks | exon | 37145369 | 37145465 | . | - | . | gene_id | "XLOC_112482"; | transcript_id | "Novel_001530"; | exon_number | "7"; | gene_type | " |
| At_chr9 | Cufflinks | exon | 37146263 | 37146330 | . | - | . | gene_id | "XLOC_112482"; | transcript_id | "Novel_001530"; | exon_number | "8"; | gene_type | " |
| At_chr9 | Cufflinks | exon | 37146422 | 37146662 | . | - | . | gene_id | "XLOC_112482"; | transcript_id | "Novel_001530"; | exon_number | "9"; | gene_type | " |
| At_chr9 | Cufflinks | exon | 37830593 | 37831243 | . | - | . | gene_id | "XLOC_112534"; | transcript_id | "Novel_001531"; | exon_number | "1"; | gene_type | " |
| At_chr9 | Cufflinks | exon | 37831974 | 37832904 | . | - | . | gene_id | "XLOC_112534"; | transcript_id | "Novel_001531"; | exon_number | "2"; | gene_type | " |
| At_chr9 | Cufflinks | exon | 38429324 | 38429777 | . | - | . | gene_id | "XLOC_112609"; | transcript_id | "Novel_001532"; | exon_number | "1"; | gene_type | " |
| At_chr9 | Cufflinks | exon | 38429895 | 38430107 | . | - | . | gene_id | "XLOC_112609"; | transcript_id | "Novel_001532"; | exon_number | "2"; | gene_type | " |
| At_chr9 | Cufflinks | exon | 38430242 | 38430702 | . | - | . | gene_id | "XLOC_112609"; | transcript_id | "Novel_001532"; | exon_number | "3"; | gene_type | " |
| At_chr9 | Cufflinks | exon | 38431297 | 38431510 | . | - | . | gene_id | "XLOC_112609"; | transcript_id | "Novel_001532"; | exon_number | "4"; | gene_type | " |
| At_chr9 | Cufflinks | exon | 41650537 | 41651328 | . | - | . | gene_id | "XLOC_113172"; | transcript_id | "Novel_001533"; | exon_number | "1"; | gene_type | " |
| At_chr9 | Cufflinks | exon | 41652394 | 41652480 | . | - | . | gene_id | "XLOC_113172"; | transcript_id | "Novel_001533"; | exon_number | "2"; | gene_type | " |
| At_chr9 | Cufflinks | exon | 41978324 | 41978536 | . | - | . | gene_id | "XLOC_113228"; | transcript_id | "Novel_001534"; | exon_number | "1"; | gene_type | " |
| At_chr9 | Cufflinks | exon | 43826342 | 43827118 | . | - | . | gene_id | "XLOC_113561"; | transcript_id | "Novel_001535"; | exon_number | "1"; | gene_type | " |
| At_chr9 | Cufflinks | exon | 43827215 | 43827358 | . | - | . | gene_id | "XLOC_113561"; | transcript_id | "Novel_001535"; | exon_number | "2"; | gene_type | " |
| At_chr9 | Cufflinks | exon | 43827490 | 43827560 | . | - | . | gene_id | "XLOC_113561"; | transcript_id | "Novel_001535"; | exon_number | "3"; | gene_type | " |
| At_chr9 | Cufflinks | exon | 43827688 | 43827787 | . | - | . | gene_id | "XLOC_113561"; | transcript_id | "Novel_001535"; | exon_number | "4"; | gene_type | " |
| At_chr9 | Cufflinks | exon | 43828030 | 43828060 | . | - | . | gene_id | "XLOC_113561"; | transcript_id | "Novel_001535"; | exon_number | "5"; | gene_type | " |
| At_chr9 | Cufflinks | exon | 43828159 | 43828256 | . | - | . | gene_id | "XLOC_113561"; | transcript_id | "Novel_001535"; | exon_number | "6"; | gene_type | " |
| At_chr9 | Cufflinks | exon | 43828764 | 43829113 | . | - | . | gene_id | "XLOC_113561"; | transcript_id | "Novel_001535"; | exon_number | "7"; | gene_type | " |
| At_chr9 | Cufflinks | exon | 45117283 | 45118072 | . | - | . | gene_id | "XLOC_113809"; | transcript_id | "Novel_001536"; | exon_number | "1"; | gene_type | " |
| At_chr9 | Cufflinks | exon | 46105010 | 46107717 | . | - | . | gene_id | "XLOC_113999"; | transcript_id | "Novel_001537"; | exon_number | "1"; | gene_type | " |
| At_chr9 | Cufflinks | exon | 46108090 | 46108206 | . | - | . | gene_id | "XLOC_113999"; | transcript_id | "Novel_001537"; | exon_number | "2"; | gene_type | " |
| At_chr9 | Cufflinks | exon | 46105010 | 46105790 | . | - | . | gene_id | "XLOC_113999"; | transcript_id | "Novel_001538"; | exon_number | "1"; | gene_type | " |
| At_chr9 | Cufflinks | exon | 46105888 | 46107717 | . | - | . | gene_id | "XLOC_113999"; | transcript_id | "Novel_001538"; | exon_number | "2"; | gene_type | " |
| At_chr9 | Cufflinks | exon | 46108090 | 46108206 | . | - | . | gene_id | "XLOC_113999"; | transcript_id | "Novel_001538"; | exon_number | "3"; | gene_type | " |
| At_chr9 | Cufflinks | exon | 46542145 | 46545789 | . | - | . | gene_id | "XLOC_114074"; | transcript_id | "Novel_001539"; | exon_number | "1"; | gene_type | " |
| At_chr9 | Cufflinks | exon | 46546808 | 46546918 | . | - | . | gene_id | "XLOC_114074"; | transcript_id | "Novel_001539"; | exon_number | "2"; | gene_type | " |
| At_chr9 | Cufflinks | exon | 46547982 | 46548115 | . | - | . | gene_id | "XLOC_114074"; | transcript_id | "Novel_001539"; | exon_number | "3"; | gene_type | " |
| At_chr9 | Cufflinks | exon | 46548293 | 46548691 | . | - | . | gene_id | "XLOC_114074"; | transcript_id | "Novel_001539"; | exon_number | "4"; | gene_type | " |
| At_chr9 | Cufflinks | exon | 46616677 | 46619356 | . | - | . | gene_id | "XLOC_114091"; | transcript_id | "Novel_001540"; | exon_number | "1"; | gene_type | " |
| At_chr9 | Cufflinks | exon | 46619571 | 46619697 | . | - | . | gene_id | "XLOC_114091"; | transcript_id | "Novel_001540"; | exon_number | "2"; | gene_type | " |
| At_chr9 | Cufflinks | exon | 46616677 | 46619356 | . | - | . | gene_id | "XLOC_114091"; | transcript_id | "Novel_001541"; | exon_number | "1"; | gene_type | " |
| At_chr9 | Cufflinks | exon | 46619567 | 46619699 | . | - | . | gene_id | "XLOC_114091"; | transcript_id | "Novel_001541"; | exon_number | "2"; | gene_type | " |
| At_chr9 | Cufflinks | exon | 47301077 | 47310932 | . | - | . | gene_id | "XLOC_114231"; | transcript_id | "Novel_001542"; | exon_number | "1"; | gene_type | " |
| At_chr9 | Cufflinks | exon | 49141663 | 49142573 | . | - | . | gene_id | "XLOC_114472"; | transcript_id | "Novel_001543"; | exon_number | "1"; | gene_type | " |



|         |           |      |          |          |   |   |   |         |                |               |                 |             |      |           |   |
|---------|-----------|------|----------|----------|---|---|---|---------|----------------|---------------|-----------------|-------------|------|-----------|---|
| At_chr9 | Cufflinks | exon | 49142689 | 49143212 | . | - | . | gene_id | "XLOC_114472"; | transcript_id | "Novel_001543"; | exon_number | "2"; | gene_type | " |
| At_chr9 | Cufflinks | exon | 49144124 | 49144580 | . | - | . | gene_id | "XLOC_114472"; | transcript_id | "Novel_001544"; | exon_number | "1"; | gene_type | " |
| At_chr9 | Cufflinks | exon | 49144682 | 49144819 | . | - | . | gene_id | "XLOC_114472"; | transcript_id | "Novel_001544"; | exon_number | "2"; | gene_type | " |
| At_chr9 | Cufflinks | exon | 49145195 | 49145338 | . | - | . | gene_id | "XLOC_114472"; | transcript_id | "Novel_001544"; | exon_number | "3"; | gene_type | " |
| At_chr9 | Cufflinks | exon | 49186783 | 49187006 | . | - | . | gene_id | "XLOC_114472"; | transcript_id | "Novel_001545"; | exon_number | "1"; | gene_type | " |
| At_chr9 | Cufflinks | exon | 49189097 | 49189432 | . | - | . | gene_id | "XLOC_114472"; | transcript_id | "Novel_001545"; | exon_number | "2"; | gene_type | " |
| At_chr9 | Cufflinks | exon | 49191200 | 49191365 | . | - | . | gene_id | "XLOC_114472"; | transcript_id | "Novel_001546"; | exon_number | "1"; | gene_type | " |
| At_chr9 | Cufflinks | exon | 49191458 | 49191670 | . | - | . | gene_id | "XLOC_114472"; | transcript_id | "Novel_001546"; | exon_number | "2"; | gene_type | " |
| At_chr9 | Cufflinks | exon | 49191936 | 49192061 | . | - | . | gene_id | "XLOC_114472"; | transcript_id | "Novel_001546"; | exon_number | "3"; | gene_type | " |
| At_chr9 | Cufflinks | exon | 49192163 | 49192300 | . | - | . | gene_id | "XLOC_114472"; | transcript_id | "Novel_001546"; | exon_number | "4"; | gene_type | " |
| At_chr9 | Cufflinks | exon | 49192659 | 49192712 | . | - | . | gene_id | "XLOC_114472"; | transcript_id | "Novel_001546"; | exon_number | "5"; | gene_type | " |
| At_chr9 | Cufflinks | exon | 49145393 | 49145540 | . | - | . | gene_id | "XLOC_114473"; | transcript_id | "Novel_001547"; | exon_number | "1"; | gene_type | " |
| At_chr9 | Cufflinks | exon | 49145678 | 49145772 | . | - | . | gene_id | "XLOC_114473"; | transcript_id | "Novel_001547"; | exon_number | "2"; | gene_type | " |
| At_chr9 | Cufflinks | exon | 49146207 | 49146437 | . | - | . | gene_id | "XLOC_114473"; | transcript_id | "Novel_001548"; | exon_number | "1"; | gene_type | " |
| At_chr9 | Cufflinks | exon | 49146532 | 49146646 | . | - | . | gene_id | "XLOC_114473"; | transcript_id | "Novel_001548"; | exon_number | "2"; | gene_type | " |
| At_chr9 | Cufflinks | exon | 49147070 | 49147251 | . | - | . | gene_id | "XLOC_114473"; | transcript_id | "Novel_001548"; | exon_number | "3"; | gene_type | " |
| At_chr9 | Cufflinks | exon | 49147339 | 49147534 | . | - | . | gene_id | "XLOC_114473"; | transcript_id | "Novel_001548"; | exon_number | "4"; | gene_type | " |
| At_chr9 | Cufflinks | exon | 49147932 | 49148020 | . | - | . | gene_id | "XLOC_114473"; | transcript_id | "Novel_001548"; | exon_number | "5"; | gene_type | " |
| At_chr9 | Cufflinks | exon | 49192767 | 49193045 | . | - | . | gene_id | "XLOC_114473"; | transcript_id | "Novel_001549"; | exon_number | "1"; | gene_type | " |
| At_chr9 | Cufflinks | exon | 49193182 | 49193448 | . | - | . | gene_id | "XLOC_114473"; | transcript_id | "Novel_001549"; | exon_number | "2"; | gene_type | " |
| At_chr9 | Cufflinks | exon | 49193752 | 49193938 | . | - | . | gene_id | "XLOC_114473"; | transcript_id | "Novel_001549"; | exon_number | "3"; | gene_type | " |
| At_chr9 | Cufflinks | exon | 49194040 | 49194154 | . | - | . | gene_id | "XLOC_114473"; | transcript_id | "Novel_001549"; | exon_number | "4"; | gene_type | " |
| At_chr9 | Cufflinks | exon | 49194609 | 49194790 | . | - | . | gene_id | "XLOC_114473"; | transcript_id | "Novel_001549"; | exon_number | "5"; | gene_type | " |
| At_chr9 | Cufflinks | exon | 49194894 | 49195089 | . | - | . | gene_id | "XLOC_114473"; | transcript_id | "Novel_001549"; | exon_number | "6"; | gene_type | " |
| At_chr9 | Cufflinks | exon | 49195570 | 49195908 | . | - | . | gene_id | "XLOC_114473"; | transcript_id | "Novel_001549"; | exon_number | "7"; | gene_type | " |
| At_chr9 | Cufflinks | exon | 49193053 | 49193448 | . | - | . | gene_id | "XLOC_114473"; | transcript_id | "Novel_001550"; | exon_number | "1"; | gene_type | " |
| At_chr9 | Cufflinks | exon | 49193752 | 49193938 | . | - | . | gene_id | "XLOC_114473"; | transcript_id | "Novel_001550"; | exon_number | "2"; | gene_type | " |
| At_chr9 | Cufflinks | exon | 49194040 | 49194154 | . | - | . | gene_id | "XLOC_114473"; | transcript_id | "Novel_001550"; | exon_number | "3"; | gene_type | " |
| At_chr9 | Cufflinks | exon | 49194609 | 49194790 | . | - | . | gene_id | "XLOC_114473"; | transcript_id | "Novel_001550"; | exon_number | "4"; | gene_type | " |
| At_chr9 | Cufflinks | exon | 49194894 | 49195089 | . | - | . | gene_id | "XLOC_114473"; | transcript_id | "Novel_001550"; | exon_number | "5"; | gene_type | " |
| At_chr9 | Cufflinks | exon | 49195570 | 49195840 | . | - | . | gene_id | "XLOC_114473"; | transcript_id | "Novel_001550"; | exon_number | "6"; | gene_type | " |
| At_chr9 | Cufflinks | exon | 49193694 | 49193938 | . | - | . | gene_id | "XLOC_114473"; | transcript_id | "Novel_001551"; | exon_number | "1"; | gene_type | " |
| At_chr9 | Cufflinks | exon | 49194040 | 49194154 | . | - | . | gene_id | "XLOC_114473"; | transcript_id | "Novel_001551"; | exon_number | "2"; | gene_type | " |
| At_chr9 | Cufflinks | exon | 49194609 | 49194790 | . | - | . | gene_id | "XLOC_114473"; | transcript_id | "Novel_001551"; | exon_number | "3"; | gene_type | " |
| At_chr9 | Cufflinks | exon | 49194894 | 49195089 | . | - | . | gene_id | "XLOC_114473"; | transcript_id | "Novel_001551"; | exon_number | "4"; | gene_type | " |

|         |           |      |          |          |   |   |   |         |                |               |                 |             |      |           |   |
|---------|-----------|------|----------|----------|---|---|---|---------|----------------|---------------|-----------------|-------------|------|-----------|---|
| At_chr9 | Cufflinks | exon | 49195570 | 49195908 | . | - | . | gene_id | "XLOC_114473"; | transcript_id | "Novel_001551"; | exon_number | "5"; | gene_type | " |
| At_chr9 | Cufflinks | exon | 49182926 | 49183254 | . | - | . | gene_id | "XLOC_114480"; | transcript_id | "Novel_001552"; | exon_number | "1"; | gene_type | " |
| At_chr9 | Cufflinks | exon | 49183550 | 49183614 | . | - | . | gene_id | "XLOC_114480"; | transcript_id | "Novel_001552"; | exon_number | "2"; | gene_type | " |
| At_chr9 | Cufflinks | exon | 49183723 | 49183785 | . | - | . | gene_id | "XLOC_114480"; | transcript_id | "Novel_001552"; | exon_number | "3"; | gene_type | " |
| At_chr9 | Cufflinks | exon | 49184117 | 49184165 | . | - | . | gene_id | "XLOC_114480"; | transcript_id | "Novel_001552"; | exon_number | "4"; | gene_type | " |
| At_chr9 | Cufflinks | exon | 49184467 | 49184750 | . | - | . | gene_id | "XLOC_114480"; | transcript_id | "Novel_001552"; | exon_number | "5"; | gene_type | " |
| At_chr9 | Cufflinks | exon | 49323302 | 49324039 | . | - | . | gene_id | "XLOC_114498"; | transcript_id | "Novel_001553"; | exon_number | "1"; | gene_type | " |
| At_chr9 | Cufflinks | exon | 49324121 | 49324568 | . | - | . | gene_id | "XLOC_114498"; | transcript_id | "Novel_001553"; | exon_number | "2"; | gene_type | " |
| At_chr9 | Cufflinks | exon | 50704186 | 50704885 | . | - | . | gene_id | "XLOC_114665"; | transcript_id | "Novel_001554"; | exon_number | "1"; | gene_type | " |
| At_chr9 | Cufflinks | exon | 50704992 | 50705084 | . | - | . | gene_id | "XLOC_114665"; | transcript_id | "Novel_001554"; | exon_number | "2"; | gene_type | " |
| At_chr9 | Cufflinks | exon | 50705199 | 50705958 | . | - | . | gene_id | "XLOC_114665"; | transcript_id | "Novel_001554"; | exon_number | "3"; | gene_type | " |
| At_chr9 | Cufflinks | exon | 50706313 | 50706427 | . | - | . | gene_id | "XLOC_114665"; | transcript_id | "Novel_001554"; | exon_number | "4"; | gene_type | " |
| At_chr9 | Cufflinks | exon | 50704930 | 50705084 | . | - | . | gene_id | "XLOC_114665"; | transcript_id | "Novel_001555"; | exon_number | "1"; | gene_type | " |
| At_chr9 | Cufflinks | exon | 50705199 | 50705958 | . | - | . | gene_id | "XLOC_114665"; | transcript_id | "Novel_001555"; | exon_number | "2"; | gene_type | " |
| At_chr9 | Cufflinks | exon | 50706313 | 50706332 | . | - | . | gene_id | "XLOC_114665"; | transcript_id | "Novel_001555"; | exon_number | "3"; | gene_type | " |
| At_chr9 | Cufflinks | exon | 52672485 | 52673507 | . | - | . | gene_id | "XLOC_114993"; | transcript_id | "Novel_001556"; | exon_number | "1"; | gene_type | " |
| At_chr9 | Cufflinks | exon | 52673629 | 52673715 | . | - | . | gene_id | "XLOC_114993"; | transcript_id | "Novel_001556"; | exon_number | "2"; | gene_type | " |
| At_chr9 | Cufflinks | exon | 52673819 | 52673872 | . | - | . | gene_id | "XLOC_114993"; | transcript_id | "Novel_001556"; | exon_number | "3"; | gene_type | " |
| At_chr9 | Cufflinks | exon | 52674122 | 52674184 | . | - | . | gene_id | "XLOC_114993"; | transcript_id | "Novel_001556"; | exon_number | "4"; | gene_type | " |
| At_chr9 | Cufflinks | exon | 52674273 | 52674320 | . | - | . | gene_id | "XLOC_114993"; | transcript_id | "Novel_001556"; | exon_number | "5"; | gene_type | " |
| At_chr9 | Cufflinks | exon | 52674454 | 52675051 | . | - | . | gene_id | "XLOC_114993"; | transcript_id | "Novel_001556"; | exon_number | "6"; | gene_type | " |
| At_chr9 | Cufflinks | exon | 52672485 | 52673507 | . | - | . | gene_id | "XLOC_114993"; | transcript_id | "Novel_001557"; | exon_number | "1"; | gene_type | " |
| At_chr9 | Cufflinks | exon | 52673629 | 52673715 | . | - | . | gene_id | "XLOC_114993"; | transcript_id | "Novel_001557"; | exon_number | "2"; | gene_type | " |
| At_chr9 | Cufflinks | exon | 52673819 | 52673872 | . | - | . | gene_id | "XLOC_114993"; | transcript_id | "Novel_001557"; | exon_number | "3"; | gene_type | " |
| At_chr9 | Cufflinks | exon | 52674122 | 52674184 | . | - | . | gene_id | "XLOC_114993"; | transcript_id | "Novel_001557"; | exon_number | "4"; | gene_type | " |
| At_chr9 | Cufflinks | exon | 52674273 | 52674320 | . | - | . | gene_id | "XLOC_114993"; | transcript_id | "Novel_001557"; | exon_number | "5"; | gene_type | " |
| At_chr9 | Cufflinks | exon | 52674454 | 52674633 | . | - | . | gene_id | "XLOC_114993"; | transcript_id | "Novel_001557"; | exon_number | "6"; | gene_type | " |
| At_chr9 | Cufflinks | exon | 52675167 | 52675209 | . | - | . | gene_id | "XLOC_114993"; | transcript_id | "Novel_001557"; | exon_number | "7"; | gene_type | " |
| At_chr9 | Cufflinks | exon | 53135722 | 53136101 | . | - | . | gene_id | "XLOC_115076"; | transcript_id | "Novel_001558"; | exon_number | "1"; | gene_type | " |
| At_chr9 | Cufflinks | exon | 53136213 | 53136442 | . | - | . | gene_id | "XLOC_115076"; | transcript_id | "Novel_001558"; | exon_number | "2"; | gene_type | " |
| At_chr9 | Cufflinks | exon | 53136714 | 53136811 | . | - | . | gene_id | "XLOC_115076"; | transcript_id | "Novel_001558"; | exon_number | "3"; | gene_type | " |
| At_chr9 | Cufflinks | exon | 53137003 | 53138101 | . | - | . | gene_id | "XLOC_115076"; | transcript_id | "Novel_001558"; | exon_number | "4"; | gene_type | " |
| At_chr9 | Cufflinks | exon | 53138690 | 53138769 | . | - | . | gene_id | "XLOC_115076"; | transcript_id | "Novel_001558"; | exon_number | "5"; | gene_type | " |
| At_chr9 | Cufflinks | exon | 53139062 | 53139239 | . | - | . | gene_id | "XLOC_115076"; | transcript_id | "Novel_001558"; | exon_number | "6"; | gene_type | " |
| At_chr9 | Cufflinks | exon | 53135728 | 53136101 | . | - | . | gene_id | "XLOC_115076"; | transcript_id | "Novel_001559"; | exon_number | "1"; | gene_type | " |

|         |           |      |          |          |   |   |   |         |                |               |                 |             |      |           |   |
|---------|-----------|------|----------|----------|---|---|---|---------|----------------|---------------|-----------------|-------------|------|-----------|---|
| At_chr9 | Cufflinks | exon | 53136213 | 53136305 | . | - | . | gene_id | "XLOC_115076"; | transcript_id | "Novel_001559"; | exon_number | "2"; | gene_type | " |
| At_chr9 | Cufflinks | exon | 53136380 | 53136442 | . | - | . | gene_id | "XLOC_115076"; | transcript_id | "Novel_001559"; | exon_number | "3"; | gene_type | " |
| At_chr9 | Cufflinks | exon | 53136714 | 53136811 | . | - | . | gene_id | "XLOC_115076"; | transcript_id | "Novel_001559"; | exon_number | "4"; | gene_type | " |
| At_chr9 | Cufflinks | exon | 53137003 | 53137791 | . | - | . | gene_id | "XLOC_115076"; | transcript_id | "Novel_001559"; | exon_number | "5"; | gene_type | " |
| At_chr9 | Cufflinks | exon | 53137172 | 53137945 | . | - | . | gene_id | "XLOC_115076"; | transcript_id | "Novel_001560"; | exon_number | "1"; | gene_type | " |
| At_chr9 | Cufflinks | exon | 53138029 | 53138101 | . | - | . | gene_id | "XLOC_115076"; | transcript_id | "Novel_001560"; | exon_number | "2"; | gene_type | " |
| At_chr9 | Cufflinks | exon | 53138690 | 53138769 | . | - | . | gene_id | "XLOC_115076"; | transcript_id | "Novel_001560"; | exon_number | "3"; | gene_type | " |
| At_chr9 | Cufflinks | exon | 53139062 | 53139239 | . | - | . | gene_id | "XLOC_115076"; | transcript_id | "Novel_001560"; | exon_number | "4"; | gene_type | " |
| At_chr9 | Cufflinks | exon | 53898682 | 53898996 | . | - | . | gene_id | "XLOC_115223"; | transcript_id | "Novel_001561"; | exon_number | "1"; | gene_type | " |
| At_chr9 | Cufflinks | exon | 54422865 | 54423055 | . | - | . | gene_id | "XLOC_115330"; | transcript_id | "Novel_001562"; | exon_number | "1"; | gene_type | " |
| At_chr9 | Cufflinks | exon | 54423322 | 54423658 | . | - | . | gene_id | "XLOC_115330"; | transcript_id | "Novel_001562"; | exon_number | "2"; | gene_type | " |
| At_chr9 | Cufflinks | exon | 56042877 | 56043740 | . | - | . | gene_id | "XLOC_115635"; | transcript_id | "Novel_001563"; | exon_number | "1"; | gene_type | " |
| At_chr9 | Cufflinks | exon | 56043834 | 56044152 | . | - | . | gene_id | "XLOC_115635"; | transcript_id | "Novel_001563"; | exon_number | "2"; | gene_type | " |
| At_chr9 | Cufflinks | exon | 56073728 | 56075173 | . | - | . | gene_id | "XLOC_115643"; | transcript_id | "Novel_001564"; | exon_number | "1"; | gene_type | " |
| At_chr9 | Cufflinks | exon | 56075280 | 56075866 | . | - | . | gene_id | "XLOC_115643"; | transcript_id | "Novel_001564"; | exon_number | "2"; | gene_type | " |
| At_chr9 | Cufflinks | exon | 56147115 | 56147258 | . | - | . | gene_id | "XLOC_115654"; | transcript_id | "Novel_001565"; | exon_number | "1"; | gene_type | " |
| At_chr9 | Cufflinks | exon | 56147667 | 56147833 | . | - | . | gene_id | "XLOC_115654"; | transcript_id | "Novel_001565"; | exon_number | "2"; | gene_type | " |
| At_chr9 | Cufflinks | exon | 56251965 | 56252251 | . | - | . | gene_id | "XLOC_115674"; | transcript_id | "Novel_001566"; | exon_number | "1"; | gene_type | " |
| At_chr9 | Cufflinks | exon | 56252328 | 56252404 | . | - | . | gene_id | "XLOC_115674"; | transcript_id | "Novel_001566"; | exon_number | "2"; | gene_type | " |
| At_chr9 | Cufflinks | exon | 56252604 | 56252761 | . | - | . | gene_id | "XLOC_115674"; | transcript_id | "Novel_001566"; | exon_number | "3"; | gene_type | " |
| At_chr9 | Cufflinks | exon | 56253151 | 56253236 | . | - | . | gene_id | "XLOC_115674"; | transcript_id | "Novel_001566"; | exon_number | "4"; | gene_type | " |
| At_chr9 | Cufflinks | exon | 56253327 | 56254057 | . | - | . | gene_id | "XLOC_115674"; | transcript_id | "Novel_001566"; | exon_number | "5"; | gene_type | " |
| At_chr9 | Cufflinks | exon | 56252190 | 56252404 | . | - | . | gene_id | "XLOC_115674"; | transcript_id | "Novel_001567"; | exon_number | "1"; | gene_type | " |
| At_chr9 | Cufflinks | exon | 56252604 | 56252761 | . | - | . | gene_id | "XLOC_115674"; | transcript_id | "Novel_001567"; | exon_number | "2"; | gene_type | " |
| At_chr9 | Cufflinks | exon | 56253151 | 56253236 | . | - | . | gene_id | "XLOC_115674"; | transcript_id | "Novel_001567"; | exon_number | "3"; | gene_type | " |
| At_chr9 | Cufflinks | exon | 56253327 | 56254050 | . | - | . | gene_id | "XLOC_115674"; | transcript_id | "Novel_001567"; | exon_number | "4"; | gene_type | " |
| At_chr9 | Cufflinks | exon | 56294362 | 56294530 | . | - | . | gene_id | "XLOC_115679"; | transcript_id | "Novel_001568"; | exon_number | "1"; | gene_type | " |
| At_chr9 | Cufflinks | exon | 56296352 | 56296509 | . | - | . | gene_id | "XLOC_115679"; | transcript_id | "Novel_001568"; | exon_number | "2"; | gene_type | " |
| At_chr9 | Cufflinks | exon | 56294408 | 56294530 | . | - | . | gene_id | "XLOC_115679"; | transcript_id | "Novel_001569"; | exon_number | "1"; | gene_type | " |
| At_chr9 | Cufflinks | exon | 56296352 | 56296459 | . | - | . | gene_id | "XLOC_115679"; | transcript_id | "Novel_001569"; | exon_number | "2"; | gene_type | " |
| At_chr9 | Cufflinks | exon | 56296701 | 56296727 | . | - | . | gene_id | "XLOC_115679"; | transcript_id | "Novel_001569"; | exon_number | "3"; | gene_type | " |
| At_chr9 | Cufflinks | exon | 56294409 | 56294530 | . | - | . | gene_id | "XLOC_115679"; | transcript_id | "Novel_001570"; | exon_number | "1"; | gene_type | " |
| At_chr9 | Cufflinks | exon | 56296352 | 56296459 | . | - | . | gene_id | "XLOC_115679"; | transcript_id | "Novel_001570"; | exon_number | "2"; | gene_type | " |
| At_chr9 | Cufflinks | exon | 56296654 | 56296701 | . | - | . | gene_id | "XLOC_115679"; | transcript_id | "Novel_001570"; | exon_number | "3"; | gene_type | " |
| At_chr9 | Cufflinks | exon | 56362496 | 56362548 | . | - | . | gene_id | "XLOC_115686"; | transcript_id | "Novel_001571"; | exon_number | "1"; | gene_type | " |

|         |           |      |          |          |   |   |   |         |                |               |                 |             |      |           |   |
|---------|-----------|------|----------|----------|---|---|---|---------|----------------|---------------|-----------------|-------------|------|-----------|---|
| At_chr9 | Cufflinks | exon | 56371464 | 56371922 | . | - | . | gene_id | "XLOC_115686"; | transcript_id | "Novel_001571"; | exon_number | "2"; | gene_type | " |
| At_chr9 | Cufflinks | exon | 56363098 | 56363205 | . | - | . | gene_id | "XLOC_115686"; | transcript_id | "Novel_001572"; | exon_number | "1"; | gene_type | " |
| At_chr9 | Cufflinks | exon | 56383911 | 56384027 | . | - | . | gene_id | "XLOC_115686"; | transcript_id | "Novel_001572"; | exon_number | "2"; | gene_type | " |
| At_chr9 | Cufflinks | exon | 56363433 | 56363486 | . | - | . | gene_id | "XLOC_115686"; | transcript_id | "Novel_001573"; | exon_number | "1"; | gene_type | " |
| At_chr9 | Cufflinks | exon | 56374743 | 56374844 | . | - | . | gene_id | "XLOC_115686"; | transcript_id | "Novel_001573"; | exon_number | "2"; | gene_type | " |
| At_chr9 | Cufflinks | exon | 56374936 | 56375334 | . | - | . | gene_id | "XLOC_115686"; | transcript_id | "Novel_001573"; | exon_number | "3"; | gene_type | " |
| At_chr9 | Cufflinks | exon | 56372052 | 56372269 | . | - | . | gene_id | "XLOC_115686"; | transcript_id | "Novel_001574"; | exon_number | "1"; | gene_type | " |
| At_chr9 | Cufflinks | exon | 56374743 | 56374844 | . | - | . | gene_id | "XLOC_115686"; | transcript_id | "Novel_001574"; | exon_number | "2"; | gene_type | " |
| At_chr9 | Cufflinks | exon | 56374936 | 56375336 | . | - | . | gene_id | "XLOC_115686"; | transcript_id | "Novel_001574"; | exon_number | "3"; | gene_type | " |
| At_chr9 | Cufflinks | exon | 56374423 | 56374844 | . | - | . | gene_id | "XLOC_115686"; | transcript_id | "Novel_001575"; | exon_number | "1"; | gene_type | " |
| At_chr9 | Cufflinks | exon | 56374936 | 56375336 | . | - | . | gene_id | "XLOC_115686"; | transcript_id | "Novel_001575"; | exon_number | "2"; | gene_type | " |
| At_chr9 | Cufflinks | exon | 56438230 | 56439090 | . | - | . | gene_id | "XLOC_115695"; | transcript_id | "Novel_001576"; | exon_number | "1"; | gene_type | " |
| At_chr9 | Cufflinks | exon | 56439352 | 56439653 | . | - | . | gene_id | "XLOC_115695"; | transcript_id | "Novel_001576"; | exon_number | "2"; | gene_type | " |
| At_chr9 | Cufflinks | exon | 56439772 | 56440121 | . | - | . | gene_id | "XLOC_115695"; | transcript_id | "Novel_001576"; | exon_number | "3"; | gene_type | " |
| At_chr9 | Cufflinks | exon | 57028184 | 57028572 | . | - | . | gene_id | "XLOC_115763"; | transcript_id | "Novel_001577"; | exon_number | "1"; | gene_type | " |
| At_chr9 | Cufflinks | exon | 57028892 | 57028954 | . | - | . | gene_id | "XLOC_115763"; | transcript_id | "Novel_001577"; | exon_number | "2"; | gene_type | " |
| At_chr9 | Cufflinks | exon | 57029033 | 57029214 | . | - | . | gene_id | "XLOC_115763"; | transcript_id | "Novel_001577"; | exon_number | "3"; | gene_type | " |
| At_chr9 | Cufflinks | exon | 58607252 | 58607735 | . | - | . | gene_id | "XLOC_115988"; | transcript_id | "Novel_001578"; | exon_number | "1"; | gene_type | " |
| At_chr9 | Cufflinks | exon | 59847432 | 59847662 | . | - | . | gene_id | "XLOC_116098"; | transcript_id | "Novel_001579"; | exon_number | "1"; | gene_type | " |
| At_chr9 | Cufflinks | exon | 59847790 | 59847919 | . | - | . | gene_id | "XLOC_116098"; | transcript_id | "Novel_001579"; | exon_number | "2"; | gene_type | " |
| At_chr9 | Cufflinks | exon | 59848018 | 59848188 | . | - | . | gene_id | "XLOC_116098"; | transcript_id | "Novel_001579"; | exon_number | "3"; | gene_type | " |
| At_chr9 | Cufflinks | exon | 59848284 | 59848406 | . | - | . | gene_id | "XLOC_116098"; | transcript_id | "Novel_001579"; | exon_number | "4"; | gene_type | " |
| At_chr9 | Cufflinks | exon | 59848590 | 59848694 | . | - | . | gene_id | "XLOC_116098"; | transcript_id | "Novel_001579"; | exon_number | "5"; | gene_type | " |
| At_chr9 | Cufflinks | exon | 59848787 | 59849531 | . | - | . | gene_id | "XLOC_116098"; | transcript_id | "Novel_001579"; | exon_number | "6"; | gene_type | " |
| At_chr9 | Cufflinks | exon | 59850104 | 59850404 | . | - | . | gene_id | "XLOC_116098"; | transcript_id | "Novel_001579"; | exon_number | "7"; | gene_type | " |
| At_chr9 | Cufflinks | exon | 59847508 | 59847662 | . | - | . | gene_id | "XLOC_116098"; | transcript_id | "Novel_001580"; | exon_number | "1"; | gene_type | " |
| At_chr9 | Cufflinks | exon | 59847790 | 59847919 | . | - | . | gene_id | "XLOC_116098"; | transcript_id | "Novel_001580"; | exon_number | "2"; | gene_type | " |
| At_chr9 | Cufflinks | exon | 59848018 | 59848188 | . | - | . | gene_id | "XLOC_116098"; | transcript_id | "Novel_001580"; | exon_number | "3"; | gene_type | " |
| At_chr9 | Cufflinks | exon | 59848284 | 59848406 | . | - | . | gene_id | "XLOC_116098"; | transcript_id | "Novel_001580"; | exon_number | "4"; | gene_type | " |
| At_chr9 | Cufflinks | exon | 59848590 | 59848694 | . | - | . | gene_id | "XLOC_116098"; | transcript_id | "Novel_001580"; | exon_number | "5"; | gene_type | " |
| At_chr9 | Cufflinks | exon | 59848787 | 59849817 | . | - | . | gene_id | "XLOC_116098"; | transcript_id | "Novel_001580"; | exon_number | "6"; | gene_type | " |
| At_chr9 | Cufflinks | exon | 59961464 | 59962358 | . | - | . | gene_id | "XLOC_116140"; | transcript_id | "Novel_001581"; | exon_number | "1"; | gene_type | " |
| At_chr9 | Cufflinks | exon | 59962575 | 59963076 | . | - | . | gene_id | "XLOC_116140"; | transcript_id | "Novel_001581"; | exon_number | "2"; | gene_type | " |
| At_chr9 | Cufflinks | exon | 59963150 | 59963232 | . | - | . | gene_id | "XLOC_116140"; | transcript_id | "Novel_001581"; | exon_number | "3"; | gene_type | " |
| At_chr9 | Cufflinks | exon | 59963562 | 59963729 | . | - | . | gene_id | "XLOC_116140"; | transcript_id | "Novel_001581"; | exon_number | "4"; | gene_type | " |



|         |           |      |          |          |   |   |   |         |                |               |                 |             |       |           |   |
|---------|-----------|------|----------|----------|---|---|---|---------|----------------|---------------|-----------------|-------------|-------|-----------|---|
| At_chr9 | Cufflinks | exon | 59965095 | 59965276 | . | - | . | gene_id | "XLOC_116140"; | transcript_id | "Novel_001585"; | exon_number | "9";  | gene_type | " |
| At_chr9 | Cufflinks | exon | 59970059 | 59970172 | . | - | . | gene_id | "XLOC_116140"; | transcript_id | "Novel_001585"; | exon_number | "10"; | gene_type | " |
| At_chr9 | Cufflinks | exon | 59970502 | 59970586 | . | - | . | gene_id | "XLOC_116140"; | transcript_id | "Novel_001585"; | exon_number | "11"; | gene_type | " |
| At_chr9 | Cufflinks | exon | 59970682 | 59970886 | . | - | . | gene_id | "XLOC_116140"; | transcript_id | "Novel_001585"; | exon_number | "12"; | gene_type | " |
| At_chr9 | Cufflinks | exon | 59971130 | 59971394 | . | - | . | gene_id | "XLOC_116140"; | transcript_id | "Novel_001585"; | exon_number | "13"; | gene_type | " |
| At_chr9 | Cufflinks | exon | 61524319 | 61526705 | . | - | . | gene_id | "XLOC_116228"; | transcript_id | "Novel_001586"; | exon_number | "1";  | gene_type | " |
| At_chr9 | Cufflinks | exon | 61527678 | 61527779 | . | - | . | gene_id | "XLOC_116228"; | transcript_id | "Novel_001586"; | exon_number | "2";  | gene_type | " |
| At_chr9 | Cufflinks | exon | 61528898 | 61529013 | . | - | . | gene_id | "XLOC_116228"; | transcript_id | "Novel_001586"; | exon_number | "3";  | gene_type | " |
| At_chr9 | Cufflinks | exon | 61524418 | 61526705 | . | - | . | gene_id | "XLOC_116228"; | transcript_id | "Novel_001587"; | exon_number | "1";  | gene_type | " |
| At_chr9 | Cufflinks | exon | 61527678 | 61527811 | . | - | . | gene_id | "XLOC_116228"; | transcript_id | "Novel_001587"; | exon_number | "2";  | gene_type | " |
| At_chr9 | Cufflinks | exon | 61528898 | 61529110 | . | - | . | gene_id | "XLOC_116228"; | transcript_id | "Novel_001587"; | exon_number | "3";  | gene_type | " |
| At_chr9 | Cufflinks | exon | 61524428 | 61527779 | . | - | . | gene_id | "XLOC_116228"; | transcript_id | "Novel_001588"; | exon_number | "1";  | gene_type | " |
| At_chr9 | Cufflinks | exon | 61528898 | 61528967 | . | - | . | gene_id | "XLOC_116228"; | transcript_id | "Novel_001588"; | exon_number | "2";  | gene_type | " |
| At_chr9 | Cufflinks | exon | 61524480 | 61526705 | . | - | . | gene_id | "XLOC_116228"; | transcript_id | "Novel_001589"; | exon_number | "1";  | gene_type | " |
| At_chr9 | Cufflinks | exon | 61527678 | 61528970 | . | - | . | gene_id | "XLOC_116228"; | transcript_id | "Novel_001589"; | exon_number | "2";  | gene_type | " |
| At_chr9 | Cufflinks | exon | 64354283 | 64354564 | . | - | . | gene_id | "XLOC_116575"; | transcript_id | "Novel_001590"; | exon_number | "1";  | gene_type | " |
| At_chr9 | Cufflinks | exon | 64354655 | 64354701 | . | - | . | gene_id | "XLOC_116575"; | transcript_id | "Novel_001590"; | exon_number | "2";  | gene_type | " |
| At_chr9 | Cufflinks | exon | 64354807 | 64354852 | . | - | . | gene_id | "XLOC_116575"; | transcript_id | "Novel_001590"; | exon_number | "3";  | gene_type | " |
| At_chr9 | Cufflinks | exon | 64354969 | 64355011 | . | - | . | gene_id | "XLOC_116575"; | transcript_id | "Novel_001590"; | exon_number | "4";  | gene_type | " |
| At_chr9 | Cufflinks | exon | 64355471 | 64355551 | . | - | . | gene_id | "XLOC_116575"; | transcript_id | "Novel_001590"; | exon_number | "5";  | gene_type | " |
| At_chr9 | Cufflinks | exon | 66323722 | 66324708 | . | - | . | gene_id | "XLOC_116768"; | transcript_id | "Novel_001591"; | exon_number | "1";  | gene_type | " |
| At_chr9 | Cufflinks | exon | 66324807 | 66324891 | . | - | . | gene_id | "XLOC_116768"; | transcript_id | "Novel_001591"; | exon_number | "2";  | gene_type | " |
| At_chr9 | Cufflinks | exon | 66334546 | 66335966 | . | - | . | gene_id | "XLOC_116769"; | transcript_id | "Novel_001592"; | exon_number | "1";  | gene_type | " |
| At_chr9 | Cufflinks | exon | 66337925 | 66338329 | . | - | . | gene_id | "XLOC_116769"; | transcript_id | "Novel_001592"; | exon_number | "2";  | gene_type | " |
| At_chr9 | Cufflinks | exon | 71514252 | 71514340 | . | - | . | gene_id | "XLOC_117053"; | transcript_id | "Novel_001593"; | exon_number | "1";  | gene_type | " |
| At_chr9 | Cufflinks | exon | 71514432 | 71514656 | . | - | . | gene_id | "XLOC_117053"; | transcript_id | "Novel_001593"; | exon_number | "2";  | gene_type | " |
| At_chr9 | Cufflinks | exon | 72935198 | 72936354 | . | - | . | gene_id | "XLOC_117146"; | transcript_id | "Novel_001594"; | exon_number | "1";  | gene_type | " |
| At_chr9 | Cufflinks | exon | 77317262 | 77317429 | . | - | . | gene_id | "XLOC_117291"; | transcript_id | "Novel_001595"; | exon_number | "1";  | gene_type | " |
| At_chr9 | Cufflinks | exon | 77317548 | 77317613 | . | - | . | gene_id | "XLOC_117291"; | transcript_id | "Novel_001595"; | exon_number | "2";  | gene_type | " |
| At_chr9 | Cufflinks | exon | 81541383 | 81541469 | . | - | . | gene_id | "XLOC_117485"; | transcript_id | "Novel_001596"; | exon_number | "1";  | gene_type | " |
| At_chr9 | Cufflinks | exon | 81541585 | 81541701 | . | - | . | gene_id | "XLOC_117485"; | transcript_id | "Novel_001596"; | exon_number | "2";  | gene_type | " |
| At_chr9 | Cufflinks | exon | 81541777 | 81541870 | . | - | . | gene_id | "XLOC_117485"; | transcript_id | "Novel_001596"; | exon_number | "3";  | gene_type | " |
| At_chr9 | Cufflinks | exon | 84950489 | 84950553 | . | - | . | gene_id | "XLOC_117847"; | transcript_id | "Novel_001597"; | exon_number | "1";  | gene_type | " |
| At_chr9 | Cufflinks | exon | 84951436 | 84951528 | . | - | . | gene_id | "XLOC_117847"; | transcript_id | "Novel_001597"; | exon_number | "2";  | gene_type | " |
| At_chr9 | Cufflinks | exon | 84951622 | 84951695 | . | - | . | gene_id | "XLOC_117847"; | transcript_id | "Novel_001597"; | exon_number | "3";  | gene_type | " |

|         |           |      |          |          |   |   |   |         |                |               |                 |             |      |           |   |
|---------|-----------|------|----------|----------|---|---|---|---------|----------------|---------------|-----------------|-------------|------|-----------|---|
| At_chr9 | Cufflinks | exon | 84952550 | 84952720 | . | - | . | gene_id | "XLOC_117847"; | transcript_id | "Novel_001597"; | exon_number | "4"; | gene_type | " |
| At_chr9 | Cufflinks | exon | 88072553 | 88072876 | . | - | . | gene_id | "XLOC_118034"; | transcript_id | "Novel_001598"; | exon_number | "1"; | gene_type | " |
| At_chr9 | Cufflinks | exon | 88072963 | 88073355 | . | - | . | gene_id | "XLOC_118034"; | transcript_id | "Novel_001598"; | exon_number | "2"; | gene_type | " |
| At_chr9 | Cufflinks | exon | 88073444 | 88073542 | . | - | . | gene_id | "XLOC_118034"; | transcript_id | "Novel_001598"; | exon_number | "3"; | gene_type | " |
| At_chr9 | Cufflinks | exon | 88074420 | 88074488 | . | - | . | gene_id | "XLOC_118034"; | transcript_id | "Novel_001598"; | exon_number | "4"; | gene_type | " |
| At_chr9 | Cufflinks | exon | 88074599 | 88075046 | . | - | . | gene_id | "XLOC_118034"; | transcript_id | "Novel_001598"; | exon_number | "5"; | gene_type | " |
| At_chr9 | Cufflinks | exon | 89918546 | 89918888 | . | - | . | gene_id | "XLOC_118095"; | transcript_id | "Novel_001599"; | exon_number | "1"; | gene_type | " |
| At_chr9 | Cufflinks | exon | 89919046 | 89921174 | . | - | . | gene_id | "XLOC_118095"; | transcript_id | "Novel_001599"; | exon_number | "2"; | gene_type | " |
| At_chr9 | Cufflinks | exon | 90295287 | 90296127 | . | - | . | gene_id | "XLOC_118140"; | transcript_id | "Novel_001600"; | exon_number | "1"; | gene_type | " |
| Dt_chr1 | Cufflinks | exon | 4674310  | 4674611  | . | + | . | gene_id | "XLOC_118632"; | transcript_id | "Novel_001601"; | exon_number | "1"; | gene_type | " |
| Dt_chr1 | Cufflinks | exon | 4675528  | 4676186  | . | + | . | gene_id | "XLOC_118632"; | transcript_id | "Novel_001601"; | exon_number | "2"; | gene_type | " |
| Dt_chr1 | Cufflinks | exon | 4676440  | 4676912  | . | + | . | gene_id | "XLOC_118632"; | transcript_id | "Novel_001601"; | exon_number | "3"; | gene_type | " |
| Dt_chr1 | Cufflinks | exon | 4674352  | 4674611  | . | + | . | gene_id | "XLOC_118632"; | transcript_id | "Novel_001602"; | exon_number | "1"; | gene_type | " |
| Dt_chr1 | Cufflinks | exon | 4675528  | 4676911  | . | + | . | gene_id | "XLOC_118632"; | transcript_id | "Novel_001602"; | exon_number | "2"; | gene_type | " |
| Dt_chr1 | Cufflinks | exon | 15283653 | 15283992 | . | + | . | gene_id | "XLOC_118918"; | transcript_id | "Novel_001603"; | exon_number | "1"; | gene_type | " |
| Dt_chr1 | Cufflinks | exon | 15284665 | 15284795 | . | + | . | gene_id | "XLOC_118918"; | transcript_id | "Novel_001603"; | exon_number | "2"; | gene_type | " |
| Dt_chr1 | Cufflinks | exon | 15285956 | 15286221 | . | + | . | gene_id | "XLOC_118918"; | transcript_id | "Novel_001603"; | exon_number | "3"; | gene_type | " |
| Dt_chr1 | Cufflinks | exon | 20233103 | 20233307 | . | + | . | gene_id | "XLOC_119045"; | transcript_id | "Novel_001604"; | exon_number | "1"; | gene_type | " |
| Dt_chr1 | Cufflinks | exon | 20234002 | 20234143 | . | + | . | gene_id | "XLOC_119045"; | transcript_id | "Novel_001604"; | exon_number | "2"; | gene_type | " |
| Dt_chr1 | Cufflinks | exon | 22272077 | 22272208 | . | + | . | gene_id | "XLOC_119126"; | transcript_id | "Novel_001605"; | exon_number | "1"; | gene_type | " |
| Dt_chr1 | Cufflinks | exon | 22272856 | 22272983 | . | + | . | gene_id | "XLOC_119126"; | transcript_id | "Novel_001605"; | exon_number | "2"; | gene_type | " |
| Dt_chr1 | Cufflinks | exon | 22279184 | 22279258 | . | + | . | gene_id | "XLOC_119126"; | transcript_id | "Novel_001606"; | exon_number | "1"; | gene_type | " |
| Dt_chr1 | Cufflinks | exon | 22279479 | 22279605 | . | + | . | gene_id | "XLOC_119126"; | transcript_id | "Novel_001606"; | exon_number | "2"; | gene_type | " |
| Dt_chr1 | Cufflinks | exon | 22279930 | 22280362 | . | + | . | gene_id | "XLOC_119126"; | transcript_id | "Novel_001606"; | exon_number | "3"; | gene_type | " |
| Dt_chr1 | Cufflinks | exon | 27316875 | 27316938 | . | + | . | gene_id | "XLOC_119452"; | transcript_id | "Novel_001607"; | exon_number | "1"; | gene_type | " |
| Dt_chr1 | Cufflinks | exon | 27317093 | 27317172 | . | + | . | gene_id | "XLOC_119452"; | transcript_id | "Novel_001607"; | exon_number | "2"; | gene_type | " |
| Dt_chr1 | Cufflinks | exon | 27317349 | 27317567 | . | + | . | gene_id | "XLOC_119452"; | transcript_id | "Novel_001607"; | exon_number | "3"; | gene_type | " |
| Dt_chr1 | Cufflinks | exon | 27317670 | 27318826 | . | + | . | gene_id | "XLOC_119452"; | transcript_id | "Novel_001607"; | exon_number | "4"; | gene_type | " |
| Dt_chr1 | Cufflinks | exon | 27721044 | 27721158 | . | + | . | gene_id | "XLOC_119492"; | transcript_id | "Novel_001608"; | exon_number | "1"; | gene_type | " |
| Dt_chr1 | Cufflinks | exon | 27721436 | 27722745 | . | + | . | gene_id | "XLOC_119492"; | transcript_id | "Novel_001608"; | exon_number | "2"; | gene_type | " |
| Dt_chr1 | Cufflinks | exon | 29552959 | 29553192 | . | + | . | gene_id | "XLOC_119616"; | transcript_id | "Novel_001609"; | exon_number | "1"; | gene_type | " |
| Dt_chr1 | Cufflinks | exon | 29553272 | 29554574 | . | + | . | gene_id | "XLOC_119616"; | transcript_id | "Novel_001609"; | exon_number | "2"; | gene_type | " |
| Dt_chr1 | Cufflinks | exon | 29555091 | 29555637 | . | + | . | gene_id | "XLOC_119616"; | transcript_id | "Novel_001609"; | exon_number | "3"; | gene_type | " |
| Dt_chr1 | Cufflinks | exon | 29552959 | 29553192 | . | + | . | gene_id | "XLOC_119616"; | transcript_id | "Novel_001610"; | exon_number | "1"; | gene_type | " |
| Dt_chr1 | Cufflinks | exon | 29553272 | 29553385 | . | + | . | gene_id | "XLOC_119616"; | transcript_id | "Novel_001610"; | exon_number | "2"; | gene_type | " |

|         |           |      |          |          |   |   |   |         |                |               |                 |             |      |           |   |
|---------|-----------|------|----------|----------|---|---|---|---------|----------------|---------------|-----------------|-------------|------|-----------|---|
| Dt_chr1 | Cufflinks | exon | 29553559 | 29555984 | . | + | . | gene_id | "XLOC_119616"; | transcript_id | "Novel_001610"; | exon_number | "3"; | gene_type | " |
| Dt_chr1 | Cufflinks | exon | 29622696 | 29622874 | . | + | . | gene_id | "XLOC_119621"; | transcript_id | "Novel_001611"; | exon_number | "1"; | gene_type | " |
| Dt_chr1 | Cufflinks | exon | 29622952 | 29623121 | . | + | . | gene_id | "XLOC_119621"; | transcript_id | "Novel_001611"; | exon_number | "2"; | gene_type | " |
| Dt_chr1 | Cufflinks | exon | 29623217 | 29623383 | . | + | . | gene_id | "XLOC_119621"; | transcript_id | "Novel_001611"; | exon_number | "3"; | gene_type | " |
| Dt_chr1 | Cufflinks | exon | 30499525 | 30499773 | . | + | . | gene_id | "XLOC_119673"; | transcript_id | "Novel_001612"; | exon_number | "1"; | gene_type | " |
| Dt_chr1 | Cufflinks | exon | 33620300 | 33620820 | . | + | . | gene_id | "XLOC_119968"; | transcript_id | "Novel_001613"; | exon_number | "1"; | gene_type | " |
| Dt_chr1 | Cufflinks | exon | 34757398 | 34757723 | . | + | . | gene_id | "XLOC_120068"; | transcript_id | "Novel_001614"; | exon_number | "1"; | gene_type | " |
| Dt_chr1 | Cufflinks | exon | 39792256 | 39792738 | . | + | . | gene_id | "XLOC_120754"; | transcript_id | "Novel_001615"; | exon_number | "1"; | gene_type | " |
| Dt_chr1 | Cufflinks | exon | 39793085 | 39793114 | . | + | . | gene_id | "XLOC_120754"; | transcript_id | "Novel_001615"; | exon_number | "2"; | gene_type | " |
| Dt_chr1 | Cufflinks | exon | 40627990 | 40628312 | . | + | . | gene_id | "XLOC_120891"; | transcript_id | "Novel_001616"; | exon_number | "1"; | gene_type | " |
| Dt_chr1 | Cufflinks | exon | 40628433 | 40628504 | . | + | . | gene_id | "XLOC_120891"; | transcript_id | "Novel_001616"; | exon_number | "2"; | gene_type | " |
| Dt_chr1 | Cufflinks | exon | 40629112 | 40629192 | . | + | . | gene_id | "XLOC_120891"; | transcript_id | "Novel_001616"; | exon_number | "3"; | gene_type | " |
| Dt_chr1 | Cufflinks | exon | 40631074 | 40631472 | . | + | . | gene_id | "XLOC_120891"; | transcript_id | "Novel_001616"; | exon_number | "4"; | gene_type | " |
| Dt_chr1 | Cufflinks | exon | 40628104 | 40628312 | . | + | . | gene_id | "XLOC_120891"; | transcript_id | "Novel_001617"; | exon_number | "1"; | gene_type | " |
| Dt_chr1 | Cufflinks | exon | 40628433 | 40628504 | . | + | . | gene_id | "XLOC_120891"; | transcript_id | "Novel_001617"; | exon_number | "2"; | gene_type | " |
| Dt_chr1 | Cufflinks | exon | 40629112 | 40629192 | . | + | . | gene_id | "XLOC_120891"; | transcript_id | "Novel_001617"; | exon_number | "3"; | gene_type | " |
| Dt_chr1 | Cufflinks | exon | 40630251 | 40630264 | . | + | . | gene_id | "XLOC_120891"; | transcript_id | "Novel_001617"; | exon_number | "4"; | gene_type | " |
| Dt_chr1 | Cufflinks | exon | 40735067 | 40735312 | . | + | . | gene_id | "XLOC_120910"; | transcript_id | "Novel_001618"; | exon_number | "1"; | gene_type | " |
| Dt_chr1 | Cufflinks | exon | 40899031 | 40899176 | . | + | . | gene_id | "XLOC_120953"; | transcript_id | "Novel_001619"; | exon_number | "1"; | gene_type | " |
| Dt_chr1 | Cufflinks | exon | 40901496 | 40901583 | . | + | . | gene_id | "XLOC_120953"; | transcript_id | "Novel_001619"; | exon_number | "2"; | gene_type | " |
| Dt_chr1 | Cufflinks | exon | 40975102 | 40975411 | . | + | . | gene_id | "XLOC_120961"; | transcript_id | "Novel_001620"; | exon_number | "1"; | gene_type | " |
| Dt_chr1 | Cufflinks | exon | 40975504 | 40975717 | . | + | . | gene_id | "XLOC_120961"; | transcript_id | "Novel_001620"; | exon_number | "2"; | gene_type | " |
| Dt_chr1 | Cufflinks | exon | 40975874 | 40976198 | . | + | . | gene_id | "XLOC_120961"; | transcript_id | "Novel_001620"; | exon_number | "3"; | gene_type | " |
| Dt_chr1 | Cufflinks | exon | 40976469 | 40976794 | . | + | . | gene_id | "XLOC_120961"; | transcript_id | "Novel_001621"; | exon_number | "1"; | gene_type | " |
| Dt_chr1 | Cufflinks | exon | 40977337 | 40977392 | . | + | . | gene_id | "XLOC_120961"; | transcript_id | "Novel_001621"; | exon_number | "2"; | gene_type | " |
| Dt_chr1 | Cufflinks | exon | 40977500 | 40977589 | . | + | . | gene_id | "XLOC_120961"; | transcript_id | "Novel_001621"; | exon_number | "3"; | gene_type | " |
| Dt_chr1 | Cufflinks | exon | 40977671 | 40977776 | . | + | . | gene_id | "XLOC_120961"; | transcript_id | "Novel_001621"; | exon_number | "4"; | gene_type | " |
| Dt_chr1 | Cufflinks | exon | 40978019 | 40978104 | . | + | . | gene_id | "XLOC_120962"; | transcript_id | "Novel_001622"; | exon_number | "1"; | gene_type | " |
| Dt_chr1 | Cufflinks | exon | 40978200 | 40978328 | . | + | . | gene_id | "XLOC_120962"; | transcript_id | "Novel_001622"; | exon_number | "2"; | gene_type | " |
| Dt_chr1 | Cufflinks | exon | 40978406 | 40978480 | . | + | . | gene_id | "XLOC_120962"; | transcript_id | "Novel_001622"; | exon_number | "3"; | gene_type | " |
| Dt_chr1 | Cufflinks | exon | 40978994 | 40979162 | . | + | . | gene_id | "XLOC_120962"; | transcript_id | "Novel_001622"; | exon_number | "4"; | gene_type | " |
| Dt_chr1 | Cufflinks | exon | 40979683 | 40979820 | . | + | . | gene_id | "XLOC_120962"; | transcript_id | "Novel_001622"; | exon_number | "5"; | gene_type | " |
| Dt_chr1 | Cufflinks | exon | 41079018 | 41079181 | . | + | . | gene_id | "XLOC_120977"; | transcript_id | "Novel_001623"; | exon_number | "1"; | gene_type | " |
| Dt_chr1 | Cufflinks | exon | 41079695 | 41080218 | . | + | . | gene_id | "XLOC_120977"; | transcript_id | "Novel_001623"; | exon_number | "2"; | gene_type | " |
| Dt_chr1 | Cufflinks | exon | 41382150 | 41382191 | . | + | . | gene_id | "XLOC_121028"; | transcript_id | "Novel_001624"; | exon_number | "1"; | gene_type | " |



|         |           |      |          |          |   |   |   |         |                |               |                 |             |      |           |   |
|---------|-----------|------|----------|----------|---|---|---|---------|----------------|---------------|-----------------|-------------|------|-----------|---|
| Dt_chr1 | Cufflinks | exon | 41382548 | 41383665 | . | + | . | gene_id | "XLOC_121028"; | transcript_id | "Novel_001624"; | exon_number | "2"; | gene_type | " |
| Dt_chr1 | Cufflinks | exon | 41554102 | 41554176 | . | + | . | gene_id | "XLOC_121067"; | transcript_id | "Novel_001625"; | exon_number | "1"; | gene_type | " |
| Dt_chr1 | Cufflinks | exon | 41554264 | 41554656 | . | + | . | gene_id | "XLOC_121067"; | transcript_id | "Novel_001625"; | exon_number | "2"; | gene_type | " |
| Dt_chr1 | Cufflinks | exon | 41554751 | 41554853 | . | + | . | gene_id | "XLOC_121067"; | transcript_id | "Novel_001625"; | exon_number | "3"; | gene_type | " |
| Dt_chr1 | Cufflinks | exon | 41555305 | 41555425 | . | + | . | gene_id | "XLOC_121067"; | transcript_id | "Novel_001625"; | exon_number | "4"; | gene_type | " |
| Dt_chr1 | Cufflinks | exon | 41555518 | 41555784 | . | + | . | gene_id | "XLOC_121067"; | transcript_id | "Novel_001625"; | exon_number | "5"; | gene_type | " |
| Dt_chr1 | Cufflinks | exon | 41555918 | 41556251 | . | + | . | gene_id | "XLOC_121067"; | transcript_id | "Novel_001625"; | exon_number | "6"; | gene_type | " |
| Dt_chr1 | Cufflinks | exon | 41556838 | 41556925 | . | + | . | gene_id | "XLOC_121067"; | transcript_id | "Novel_001626"; | exon_number | "1"; | gene_type | " |
| Dt_chr1 | Cufflinks | exon | 41557050 | 41557263 | . | + | . | gene_id | "XLOC_121067"; | transcript_id | "Novel_001626"; | exon_number | "2"; | gene_type | " |
| Dt_chr1 | Cufflinks | exon | 41557357 | 41557497 | . | + | . | gene_id | "XLOC_121067"; | transcript_id | "Novel_001626"; | exon_number | "3"; | gene_type | " |
| Dt_chr1 | Cufflinks | exon | 41556974 | 41557263 | . | + | . | gene_id | "XLOC_121067"; | transcript_id | "Novel_001627"; | exon_number | "1"; | gene_type | " |
| Dt_chr1 | Cufflinks | exon | 41557357 | 41557454 | . | + | . | gene_id | "XLOC_121067"; | transcript_id | "Novel_001627"; | exon_number | "2"; | gene_type | " |
| Dt_chr1 | Cufflinks | exon | 41786959 | 41787440 | . | + | . | gene_id | "XLOC_121111"; | transcript_id | "Novel_001628"; | exon_number | "1"; | gene_type | " |
| Dt_chr1 | Cufflinks | exon | 41788427 | 41788546 | . | + | . | gene_id | "XLOC_121111"; | transcript_id | "Novel_001628"; | exon_number | "2"; | gene_type | " |
| Dt_chr1 | Cufflinks | exon | 41789318 | 41789438 | . | + | . | gene_id | "XLOC_121111"; | transcript_id | "Novel_001628"; | exon_number | "3"; | gene_type | " |
| Dt_chr1 | Cufflinks | exon | 41789524 | 41789676 | . | + | . | gene_id | "XLOC_121111"; | transcript_id | "Novel_001628"; | exon_number | "4"; | gene_type | " |
| Dt_chr1 | Cufflinks | exon | 42154441 | 42155166 | . | + | . | gene_id | "XLOC_121158"; | transcript_id | "Novel_001629"; | exon_number | "1"; | gene_type | " |
| Dt_chr1 | Cufflinks | exon | 42155258 | 42156106 | . | + | . | gene_id | "XLOC_121158"; | transcript_id | "Novel_001629"; | exon_number | "2"; | gene_type | " |
| Dt_chr1 | Cufflinks | exon | 42521028 | 42521328 | . | + | . | gene_id | "XLOC_121216"; | transcript_id | "Novel_001630"; | exon_number | "1"; | gene_type | " |
| Dt_chr1 | Cufflinks | exon | 42521423 | 42521480 | . | + | . | gene_id | "XLOC_121216"; | transcript_id | "Novel_001630"; | exon_number | "2"; | gene_type | " |
| Dt_chr1 | Cufflinks | exon | 42607810 | 42608155 | . | + | . | gene_id | "XLOC_121233"; | transcript_id | "Novel_001631"; | exon_number | "1"; | gene_type | " |
| Dt_chr1 | Cufflinks | exon | 42608868 | 42608926 | . | + | . | gene_id | "XLOC_121233"; | transcript_id | "Novel_001631"; | exon_number | "2"; | gene_type | " |
| Dt_chr1 | Cufflinks | exon | 42609010 | 42609677 | . | + | . | gene_id | "XLOC_121233"; | transcript_id | "Novel_001631"; | exon_number | "3"; | gene_type | " |
| Dt_chr1 | Cufflinks | exon | 42609750 | 42610053 | . | + | . | gene_id | "XLOC_121233"; | transcript_id | "Novel_001631"; | exon_number | "4"; | gene_type | " |
| Dt_chr1 | Cufflinks | exon | 42607886 | 42608155 | . | + | . | gene_id | "XLOC_121233"; | transcript_id | "Novel_001632"; | exon_number | "1"; | gene_type | " |
| Dt_chr1 | Cufflinks | exon | 42608868 | 42609443 | . | + | . | gene_id | "XLOC_121233"; | transcript_id | "Novel_001632"; | exon_number | "2"; | gene_type | " |
| Dt_chr1 | Cufflinks | exon | 42609750 | 42609821 | . | + | . | gene_id | "XLOC_121233"; | transcript_id | "Novel_001632"; | exon_number | "3"; | gene_type | " |
| Dt_chr1 | Cufflinks | exon | 42607888 | 42608155 | . | + | . | gene_id | "XLOC_121233"; | transcript_id | "Novel_001633"; | exon_number | "1"; | gene_type | " |
| Dt_chr1 | Cufflinks | exon | 42609010 | 42609526 | . | + | . | gene_id | "XLOC_121233"; | transcript_id | "Novel_001633"; | exon_number | "2"; | gene_type | " |
| Dt_chr1 | Cufflinks | exon | 42683837 | 42684563 | . | + | . | gene_id | "XLOC_121240"; | transcript_id | "Novel_001634"; | exon_number | "1"; | gene_type | " |
| Dt_chr1 | Cufflinks | exon | 42845093 | 42845347 | . | + | . | gene_id | "XLOC_121277"; | transcript_id | "Novel_001635"; | exon_number | "1"; | gene_type | " |
| Dt_chr1 | Cufflinks | exon | 42845686 | 42847932 | . | + | . | gene_id | "XLOC_121277"; | transcript_id | "Novel_001635"; | exon_number | "2"; | gene_type | " |
| Dt_chr1 | Cufflinks | exon | 42845180 | 42845347 | . | + | . | gene_id | "XLOC_121277"; | transcript_id | "Novel_001636"; | exon_number | "1"; | gene_type | " |
| Dt_chr1 | Cufflinks | exon | 42845686 | 42846708 | . | + | . | gene_id | "XLOC_121277"; | transcript_id | "Novel_001636"; | exon_number | "2"; | gene_type | " |
| Dt_chr1 | Cufflinks | exon | 42846806 | 42846831 | . | + | . | gene_id | "XLOC_121277"; | transcript_id | "Novel_001636"; | exon_number | "3"; | gene_type | " |

|         |           |      |          |          |   |   |   |         |                |               |                 |             |      |           |   |
|---------|-----------|------|----------|----------|---|---|---|---------|----------------|---------------|-----------------|-------------|------|-----------|---|
| Dt_chr1 | Cufflinks | exon | 42847277 | 42847348 | . | + | . | gene_id | "XLOC_121277"; | transcript_id | "Novel_001636"; | exon_number | "4"; | gene_type | " |
| Dt_chr1 | Cufflinks | exon | 42847602 | 42847658 | . | + | . | gene_id | "XLOC_121277"; | transcript_id | "Novel_001636"; | exon_number | "5"; | gene_type | " |
| Dt_chr1 | Cufflinks | exon | 42847756 | 42848210 | . | + | . | gene_id | "XLOC_121277"; | transcript_id | "Novel_001636"; | exon_number | "6"; | gene_type | " |
| Dt_chr1 | Cufflinks | exon | 42996406 | 42997227 | . | + | . | gene_id | "XLOC_121303"; | transcript_id | "Novel_001637"; | exon_number | "1"; | gene_type | " |
| Dt_chr1 | Cufflinks | exon | 42997314 | 42997820 | . | + | . | gene_id | "XLOC_121303"; | transcript_id | "Novel_001637"; | exon_number | "2"; | gene_type | " |
| Dt_chr1 | Cufflinks | exon | 43031208 | 43031605 | . | + | . | gene_id | "XLOC_121309"; | transcript_id | "Novel_001638"; | exon_number | "1"; | gene_type | " |
| Dt_chr1 | Cufflinks | exon | 43031727 | 43031986 | . | + | . | gene_id | "XLOC_121309"; | transcript_id | "Novel_001638"; | exon_number | "2"; | gene_type | " |
| Dt_chr1 | Cufflinks | exon | 43156211 | 43157238 | . | + | . | gene_id | "XLOC_121347"; | transcript_id | "Novel_001639"; | exon_number | "1"; | gene_type | " |
| Dt_chr1 | Cufflinks | exon | 43157664 | 43157675 | . | + | . | gene_id | "XLOC_121347"; | transcript_id | "Novel_001639"; | exon_number | "2"; | gene_type | " |
| Dt_chr1 | Cufflinks | exon | 43162475 | 43162558 | . | + | . | gene_id | "XLOC_121349"; | transcript_id | "Novel_001640"; | exon_number | "1"; | gene_type | " |
| Dt_chr1 | Cufflinks | exon | 43162647 | 43162782 | . | + | . | gene_id | "XLOC_121349"; | transcript_id | "Novel_001640"; | exon_number | "2"; | gene_type | " |
| Dt_chr1 | Cufflinks | exon | 43163152 | 43163253 | . | + | . | gene_id | "XLOC_121349"; | transcript_id | "Novel_001640"; | exon_number | "3"; | gene_type | " |
| Dt_chr1 | Cufflinks | exon | 43163341 | 43164466 | . | + | . | gene_id | "XLOC_121349"; | transcript_id | "Novel_001640"; | exon_number | "4"; | gene_type | " |
| Dt_chr1 | Cufflinks | exon | 43209430 | 43209504 | . | + | . | gene_id | "XLOC_121360"; | transcript_id | "Novel_001641"; | exon_number | "1"; | gene_type | " |
| Dt_chr1 | Cufflinks | exon | 43209822 | 43209950 | . | + | . | gene_id | "XLOC_121360"; | transcript_id | "Novel_001641"; | exon_number | "2"; | gene_type | " |
| Dt_chr1 | Cufflinks | exon | 43210129 | 43211246 | . | + | . | gene_id | "XLOC_121360"; | transcript_id | "Novel_001641"; | exon_number | "3"; | gene_type | " |
| Dt_chr1 | Cufflinks | exon | 43211654 | 43211896 | . | + | . | gene_id | "XLOC_121361"; | transcript_id | "Novel_001642"; | exon_number | "1"; | gene_type | " |
| Dt_chr1 | Cufflinks | exon | 43212240 | 43212526 | . | + | . | gene_id | "XLOC_121361"; | transcript_id | "Novel_001642"; | exon_number | "2"; | gene_type | " |
| Dt_chr1 | Cufflinks | exon | 43212675 | 43212784 | . | + | . | gene_id | "XLOC_121361"; | transcript_id | "Novel_001642"; | exon_number | "3"; | gene_type | " |
| Dt_chr1 | Cufflinks | exon | 43212926 | 43213087 | . | + | . | gene_id | "XLOC_121362"; | transcript_id | "Novel_001643"; | exon_number | "1"; | gene_type | " |
| Dt_chr1 | Cufflinks | exon | 43213172 | 43213629 | . | + | . | gene_id | "XLOC_121362"; | transcript_id | "Novel_001643"; | exon_number | "2"; | gene_type | " |
| Dt_chr1 | Cufflinks | exon | 43251437 | 43253460 | . | + | . | gene_id | "XLOC_121366"; | transcript_id | "Novel_001644"; | exon_number | "1"; | gene_type | " |
| Dt_chr1 | Cufflinks | exon | 43254100 | 43254587 | . | + | . | gene_id | "XLOC_121366"; | transcript_id | "Novel_001644"; | exon_number | "2"; | gene_type | " |
| Dt_chr1 | Cufflinks | exon | 43251440 | 43253108 | . | + | . | gene_id | "XLOC_121366"; | transcript_id | "Novel_001645"; | exon_number | "1"; | gene_type | " |
| Dt_chr1 | Cufflinks | exon | 43253303 | 43253460 | . | + | . | gene_id | "XLOC_121366"; | transcript_id | "Novel_001645"; | exon_number | "2"; | gene_type | " |
| Dt_chr1 | Cufflinks | exon | 43254100 | 43254181 | . | + | . | gene_id | "XLOC_121366"; | transcript_id | "Novel_001645"; | exon_number | "3"; | gene_type | " |
| Dt_chr1 | Cufflinks | exon | 43254763 | 43255510 | . | + | . | gene_id | "XLOC_121366"; | transcript_id | "Novel_001645"; | exon_number | "4"; | gene_type | " |
| Dt_chr1 | Cufflinks | exon | 43258891 | 43258956 | . | + | . | gene_id | "XLOC_121368"; | transcript_id | "Novel_001646"; | exon_number | "1"; | gene_type | " |
| Dt_chr1 | Cufflinks | exon | 43259155 | 43259233 | . | + | . | gene_id | "XLOC_121368"; | transcript_id | "Novel_001646"; | exon_number | "2"; | gene_type | " |
| Dt_chr1 | Cufflinks | exon | 43259386 | 43259893 | . | + | . | gene_id | "XLOC_121368"; | transcript_id | "Novel_001646"; | exon_number | "3"; | gene_type | " |
| Dt_chr1 | Cufflinks | exon | 43261758 | 43261887 | . | + | . | gene_id | "XLOC_121368"; | transcript_id | "Novel_001646"; | exon_number | "4"; | gene_type | " |
| Dt_chr1 | Cufflinks | exon | 43262139 | 43262723 | . | + | . | gene_id | "XLOC_121368"; | transcript_id | "Novel_001646"; | exon_number | "5"; | gene_type | " |
| Dt_chr1 | Cufflinks | exon | 43258891 | 43258956 | . | + | . | gene_id | "XLOC_121368"; | transcript_id | "Novel_001647"; | exon_number | "1"; | gene_type | " |
| Dt_chr1 | Cufflinks | exon | 43259155 | 43259233 | . | + | . | gene_id | "XLOC_121368"; | transcript_id | "Novel_001647"; | exon_number | "2"; | gene_type | " |
| Dt_chr1 | Cufflinks | exon | 43259386 | 43259505 | . | + | . | gene_id | "XLOC_121368"; | transcript_id | "Novel_001647"; | exon_number | "3"; | gene_type | " |

|         |           |      |          |          |   |   |   |         |                |               |                 |             |      |           |   |
|---------|-----------|------|----------|----------|---|---|---|---------|----------------|---------------|-----------------|-------------|------|-----------|---|
| Dt_chr1 | Cufflinks | exon | 43259765 | 43259893 | . | + | . | gene_id | "XLOC_121368"; | transcript_id | "Novel_001647"; | exon_number | "4"; | gene_type | " |
| Dt_chr1 | Cufflinks | exon | 43261758 | 43261887 | . | + | . | gene_id | "XLOC_121368"; | transcript_id | "Novel_001647"; | exon_number | "5"; | gene_type | " |
| Dt_chr1 | Cufflinks | exon | 43262139 | 43262723 | . | + | . | gene_id | "XLOC_121368"; | transcript_id | "Novel_001647"; | exon_number | "6"; | gene_type | " |
| Dt_chr1 | Cufflinks | exon | 43259903 | 43261887 | . | + | . | gene_id | "XLOC_121368"; | transcript_id | "Novel_001648"; | exon_number | "1"; | gene_type | " |
| Dt_chr1 | Cufflinks | exon | 43262139 | 43262489 | . | + | . | gene_id | "XLOC_121368"; | transcript_id | "Novel_001648"; | exon_number | "2"; | gene_type | " |
| Dt_chr1 | Cufflinks | exon | 43292138 | 43292369 | . | + | . | gene_id | "XLOC_121373"; | transcript_id | "Novel_001649"; | exon_number | "1"; | gene_type | " |
| Dt_chr1 | Cufflinks | exon | 43293414 | 43294371 | . | + | . | gene_id | "XLOC_121373"; | transcript_id | "Novel_001649"; | exon_number | "2"; | gene_type | " |
| Dt_chr1 | Cufflinks | exon | 43336968 | 43338345 | . | + | . | gene_id | "XLOC_121390"; | transcript_id | "Novel_001650"; | exon_number | "1"; | gene_type | " |
| Dt_chr1 | Cufflinks | exon | 43338476 | 43340838 | . | + | . | gene_id | "XLOC_121390"; | transcript_id | "Novel_001650"; | exon_number | "2"; | gene_type | " |
| Dt_chr1 | Cufflinks | exon | 43336985 | 43337274 | . | + | . | gene_id | "XLOC_121390"; | transcript_id | "Novel_001651"; | exon_number | "1"; | gene_type | " |
| Dt_chr1 | Cufflinks | exon | 43337593 | 43337722 | . | + | . | gene_id | "XLOC_121390"; | transcript_id | "Novel_001651"; | exon_number | "2"; | gene_type | " |
| Dt_chr1 | Cufflinks | exon | 43337821 | 43338345 | . | + | . | gene_id | "XLOC_121390"; | transcript_id | "Novel_001651"; | exon_number | "3"; | gene_type | " |
| Dt_chr1 | Cufflinks | exon | 43338476 | 43340364 | . | + | . | gene_id | "XLOC_121390"; | transcript_id | "Novel_001651"; | exon_number | "4"; | gene_type | " |
| Dt_chr1 | Cufflinks | exon | 43337056 | 43337274 | . | + | . | gene_id | "XLOC_121390"; | transcript_id | "Novel_001652"; | exon_number | "1"; | gene_type | " |
| Dt_chr1 | Cufflinks | exon | 43337593 | 43338345 | . | + | . | gene_id | "XLOC_121390"; | transcript_id | "Novel_001652"; | exon_number | "2"; | gene_type | " |
| Dt_chr1 | Cufflinks | exon | 43338476 | 43340677 | . | + | . | gene_id | "XLOC_121390"; | transcript_id | "Novel_001652"; | exon_number | "3"; | gene_type | " |
| Dt_chr1 | Cufflinks | exon | 43354876 | 43356623 | . | + | . | gene_id | "XLOC_121398"; | transcript_id | "Novel_001653"; | exon_number | "1"; | gene_type | " |
| Dt_chr1 | Cufflinks | exon | 43356915 | 43357070 | . | + | . | gene_id | "XLOC_121398"; | transcript_id | "Novel_001653"; | exon_number | "2"; | gene_type | " |
| Dt_chr1 | Cufflinks | exon | 43357579 | 43357830 | . | + | . | gene_id | "XLOC_121398"; | transcript_id | "Novel_001653"; | exon_number | "3"; | gene_type | " |
| Dt_chr1 | Cufflinks | exon | 43357909 | 43358509 | . | + | . | gene_id | "XLOC_121398"; | transcript_id | "Novel_001653"; | exon_number | "4"; | gene_type | " |
| Dt_chr1 | Cufflinks | exon | 43354876 | 43355234 | . | + | . | gene_id | "XLOC_121398"; | transcript_id | "Novel_001654"; | exon_number | "1"; | gene_type | " |
| Dt_chr1 | Cufflinks | exon | 43356915 | 43357070 | . | + | . | gene_id | "XLOC_121398"; | transcript_id | "Novel_001654"; | exon_number | "2"; | gene_type | " |
| Dt_chr1 | Cufflinks | exon | 43357579 | 43357830 | . | + | . | gene_id | "XLOC_121398"; | transcript_id | "Novel_001654"; | exon_number | "3"; | gene_type | " |
| Dt_chr1 | Cufflinks | exon | 43357909 | 43358509 | . | + | . | gene_id | "XLOC_121398"; | transcript_id | "Novel_001654"; | exon_number | "4"; | gene_type | " |
| Dt_chr1 | Cufflinks | exon | 43354876 | 43356005 | . | + | . | gene_id | "XLOC_121398"; | transcript_id | "Novel_001655"; | exon_number | "1"; | gene_type | " |
| Dt_chr1 | Cufflinks | exon | 43356556 | 43356623 | . | + | . | gene_id | "XLOC_121398"; | transcript_id | "Novel_001655"; | exon_number | "2"; | gene_type | " |
| Dt_chr1 | Cufflinks | exon | 43356915 | 43357070 | . | + | . | gene_id | "XLOC_121398"; | transcript_id | "Novel_001655"; | exon_number | "3"; | gene_type | " |
| Dt_chr1 | Cufflinks | exon | 43357579 | 43357830 | . | + | . | gene_id | "XLOC_121398"; | transcript_id | "Novel_001655"; | exon_number | "4"; | gene_type | " |
| Dt_chr1 | Cufflinks | exon | 43357909 | 43358509 | . | + | . | gene_id | "XLOC_121398"; | transcript_id | "Novel_001655"; | exon_number | "5"; | gene_type | " |
| Dt_chr1 | Cufflinks | exon | 43397431 | 43397807 | . | + | . | gene_id | "XLOC_121400"; | transcript_id | "Novel_001656"; | exon_number | "1"; | gene_type | " |
| Dt_chr1 | Cufflinks | exon | 43397913 | 43398062 | . | + | . | gene_id | "XLOC_121400"; | transcript_id | "Novel_001656"; | exon_number | "2"; | gene_type | " |
| Dt_chr1 | Cufflinks | exon | 43401968 | 43402039 | . | + | . | gene_id | "XLOC_121400"; | transcript_id | "Novel_001657"; | exon_number | "1"; | gene_type | " |
| Dt_chr1 | Cufflinks | exon | 43402128 | 43402464 | . | + | . | gene_id | "XLOC_121400"; | transcript_id | "Novel_001657"; | exon_number | "2"; | gene_type | " |
| Dt_chr1 | Cufflinks | exon | 43402566 | 43402655 | . | + | . | gene_id | "XLOC_121401"; | transcript_id | "Novel_001658"; | exon_number | "1"; | gene_type | " |
| Dt_chr1 | Cufflinks | exon | 43402737 | 43402836 | . | + | . | gene_id | "XLOC_121401"; | transcript_id | "Novel_001658"; | exon_number | "2"; | gene_type | " |



|         |           |      |          |          |   |   |   |         |                |               |                 |             |      |           |   |
|---------|-----------|------|----------|----------|---|---|---|---------|----------------|---------------|-----------------|-------------|------|-----------|---|
| Dt_chr1 | Cufflinks | exon | 43829721 | 43830197 | . | + | . | gene_id | "XLOC_121459"; | transcript_id | "Novel_001666"; | exon_number | "6"; | gene_type | " |
| Dt_chr1 | Cufflinks | exon | 43830548 | 43831173 | . | + | . | gene_id | "XLOC_121459"; | transcript_id | "Novel_001666"; | exon_number | "7"; | gene_type | " |
| Dt_chr1 | Cufflinks | exon | 43827918 | 43828087 | . | + | . | gene_id | "XLOC_121459"; | transcript_id | "Novel_001667"; | exon_number | "1"; | gene_type | " |
| Dt_chr1 | Cufflinks | exon | 43828540 | 43828600 | . | + | . | gene_id | "XLOC_121459"; | transcript_id | "Novel_001667"; | exon_number | "2"; | gene_type | " |
| Dt_chr1 | Cufflinks | exon | 43828700 | 43829202 | . | + | . | gene_id | "XLOC_121459"; | transcript_id | "Novel_001667"; | exon_number | "3"; | gene_type | " |
| Dt_chr1 | Cufflinks | exon | 43827918 | 43828087 | . | + | . | gene_id | "XLOC_121459"; | transcript_id | "Novel_001668"; | exon_number | "1"; | gene_type | " |
| Dt_chr1 | Cufflinks | exon | 43828540 | 43828600 | . | + | . | gene_id | "XLOC_121459"; | transcript_id | "Novel_001668"; | exon_number | "2"; | gene_type | " |
| Dt_chr1 | Cufflinks | exon | 43828700 | 43828963 | . | + | . | gene_id | "XLOC_121459"; | transcript_id | "Novel_001668"; | exon_number | "3"; | gene_type | " |
| Dt_chr1 | Cufflinks | exon | 43829187 | 43829633 | . | + | . | gene_id | "XLOC_121459"; | transcript_id | "Novel_001668"; | exon_number | "4"; | gene_type | " |
| Dt_chr1 | Cufflinks | exon | 43829721 | 43830197 | . | + | . | gene_id | "XLOC_121459"; | transcript_id | "Novel_001668"; | exon_number | "5"; | gene_type | " |
| Dt_chr1 | Cufflinks | exon | 43830548 | 43832101 | . | + | . | gene_id | "XLOC_121459"; | transcript_id | "Novel_001668"; | exon_number | "6"; | gene_type | " |
| Dt_chr1 | Cufflinks | exon | 44538917 | 44539242 | . | + | . | gene_id | "XLOC_121539"; | transcript_id | "Novel_001669"; | exon_number | "1"; | gene_type | " |
| Dt_chr1 | Cufflinks | exon | 44540054 | 44540168 | . | + | . | gene_id | "XLOC_121539"; | transcript_id | "Novel_001669"; | exon_number | "2"; | gene_type | " |
| Dt_chr1 | Cufflinks | exon | 44540676 | 44540851 | . | + | . | gene_id | "XLOC_121539"; | transcript_id | "Novel_001669"; | exon_number | "3"; | gene_type | " |
| Dt_chr1 | Cufflinks | exon | 44541489 | 44541584 | . | + | . | gene_id | "XLOC_121539"; | transcript_id | "Novel_001669"; | exon_number | "4"; | gene_type | " |
| Dt_chr1 | Cufflinks | exon | 44541668 | 44541825 | . | + | . | gene_id | "XLOC_121539"; | transcript_id | "Novel_001669"; | exon_number | "5"; | gene_type | " |
| Dt_chr1 | Cufflinks | exon | 50908659 | 50909217 | . | + | . | gene_id | "XLOC_122229"; | transcript_id | "Novel_001670"; | exon_number | "1"; | gene_type | " |
| Dt_chr1 | Cufflinks | exon | 50911447 | 50911562 | . | + | . | gene_id | "XLOC_122229"; | transcript_id | "Novel_001670"; | exon_number | "2"; | gene_type | " |
| Dt_chr1 | Cufflinks | exon | 50911660 | 50912213 | . | + | . | gene_id | "XLOC_122229"; | transcript_id | "Novel_001670"; | exon_number | "3"; | gene_type | " |
| Dt_chr1 | Cufflinks | exon | 53568732 | 53570826 | . | + | . | gene_id | "XLOC_122490"; | transcript_id | "Novel_001671"; | exon_number | "1"; | gene_type | " |
| Dt_chr1 | Cufflinks | exon | 53570967 | 53571314 | . | + | . | gene_id | "XLOC_122490"; | transcript_id | "Novel_001671"; | exon_number | "2"; | gene_type | " |
| Dt_chr1 | Cufflinks | exon | 53568893 | 53569407 | . | + | . | gene_id | "XLOC_122490"; | transcript_id | "Novel_001672"; | exon_number | "1"; | gene_type | " |
| Dt_chr1 | Cufflinks | exon | 53569834 | 53569918 | . | + | . | gene_id | "XLOC_122490"; | transcript_id | "Novel_001672"; | exon_number | "2"; | gene_type | " |
| Dt_chr1 | Cufflinks | exon | 53570785 | 53570826 | . | + | . | gene_id | "XLOC_122490"; | transcript_id | "Novel_001672"; | exon_number | "3"; | gene_type | " |
| Dt_chr1 | Cufflinks | exon | 53570967 | 53571549 | . | + | . | gene_id | "XLOC_122490"; | transcript_id | "Novel_001672"; | exon_number | "4"; | gene_type | " |
| Dt_chr1 | Cufflinks | exon | 53837728 | 53838007 | . | + | . | gene_id | "XLOC_122507"; | transcript_id | "Novel_001673"; | exon_number | "1"; | gene_type | " |
| Dt_chr1 | Cufflinks | exon | 53950956 | 53951340 | . | + | . | gene_id | "XLOC_122523"; | transcript_id | "Novel_001674"; | exon_number | "1"; | gene_type | " |
| Dt_chr1 | Cufflinks | exon | 53952684 | 53954046 | . | + | . | gene_id | "XLOC_122523"; | transcript_id | "Novel_001674"; | exon_number | "2"; | gene_type | " |
| Dt_chr1 | Cufflinks | exon | 53950956 | 53951340 | . | + | . | gene_id | "XLOC_122523"; | transcript_id | "Novel_001675"; | exon_number | "1"; | gene_type | " |
| Dt_chr1 | Cufflinks | exon | 53952684 | 53952770 | . | + | . | gene_id | "XLOC_122523"; | transcript_id | "Novel_001675"; | exon_number | "2"; | gene_type | " |
| Dt_chr1 | Cufflinks | exon | 53953114 | 53953206 | . | + | . | gene_id | "XLOC_122523"; | transcript_id | "Novel_001675"; | exon_number | "3"; | gene_type | " |
| Dt_chr1 | Cufflinks | exon | 53953718 | 53953772 | . | + | . | gene_id | "XLOC_122523"; | transcript_id | "Novel_001675"; | exon_number | "4"; | gene_type | " |
| Dt_chr1 | Cufflinks | exon | 53954032 | 53954046 | . | + | . | gene_id | "XLOC_122523"; | transcript_id | "Novel_001675"; | exon_number | "5"; | gene_type | " |
| Dt_chr1 | Cufflinks | exon | 53950964 | 53951353 | . | + | . | gene_id | "XLOC_122523"; | transcript_id | "Novel_001676"; | exon_number | "1"; | gene_type | " |
| Dt_chr1 | Cufflinks | exon | 53952684 | 53952770 | . | + | . | gene_id | "XLOC_122523"; | transcript_id | "Novel_001676"; | exon_number | "2"; | gene_type | " |

|         |           |      |          |          |   |   |   |         |                |               |                 |             |      |           |   |
|---------|-----------|------|----------|----------|---|---|---|---------|----------------|---------------|-----------------|-------------|------|-----------|---|
| Dt_chr1 | Cufflinks | exon | 53953114 | 53953206 | . | + | . | gene_id | "XLOC_122523"; | transcript_id | "Novel_001676"; | exon_number | "3"; | gene_type | " |
| Dt_chr1 | Cufflinks | exon | 53953718 | 53953772 | . | + | . | gene_id | "XLOC_122523"; | transcript_id | "Novel_001676"; | exon_number | "4"; | gene_type | " |
| Dt_chr1 | Cufflinks | exon | 53954032 | 53954059 | . | + | . | gene_id | "XLOC_122523"; | transcript_id | "Novel_001676"; | exon_number | "5"; | gene_type | " |
| Dt_chr1 | Cufflinks | exon | 54736403 | 54736424 | . | + | . | gene_id | "XLOC_122630"; | transcript_id | "Novel_001677"; | exon_number | "1"; | gene_type | " |
| Dt_chr1 | Cufflinks | exon | 54736510 | 54736752 | . | + | . | gene_id | "XLOC_122630"; | transcript_id | "Novel_001677"; | exon_number | "2"; | gene_type | " |
| Dt_chr1 | Cufflinks | exon | 55027878 | 55029144 | . | + | . | gene_id | "XLOC_122666"; | transcript_id | "Novel_001678"; | exon_number | "1"; | gene_type | " |
| Dt_chr1 | Cufflinks | exon | 55030191 | 55031187 | . | + | . | gene_id | "XLOC_122666"; | transcript_id | "Novel_001678"; | exon_number | "2"; | gene_type | " |
| Dt_chr1 | Cufflinks | exon | 57763474 | 57763738 | . | + | . | gene_id | "XLOC_122909"; | transcript_id | "Novel_001679"; | exon_number | "1"; | gene_type | " |
| Dt_chr1 | Cufflinks | exon | 57764014 | 57764208 | . | + | . | gene_id | "XLOC_122909"; | transcript_id | "Novel_001679"; | exon_number | "2"; | gene_type | " |
| Dt_chr1 | Cufflinks | exon | 57763474 | 57763623 | . | + | . | gene_id | "XLOC_122909"; | transcript_id | "Novel_001680"; | exon_number | "1"; | gene_type | " |
| Dt_chr1 | Cufflinks | exon | 57764014 | 57764208 | . | + | . | gene_id | "XLOC_122909"; | transcript_id | "Novel_001680"; | exon_number | "2"; | gene_type | " |
| Dt_chr1 | Cufflinks | exon | 60370272 | 60370307 | . | + | . | gene_id | "XLOC_123105"; | transcript_id | "Novel_001681"; | exon_number | "1"; | gene_type | " |
| Dt_chr1 | Cufflinks | exon | 60370619 | 60371108 | . | + | . | gene_id | "XLOC_123105"; | transcript_id | "Novel_001681"; | exon_number | "2"; | gene_type | " |
| Dt_chr1 | Cufflinks | exon | 61683491 | 61683611 | . | + | . | gene_id | "XLOC_123173"; | transcript_id | "Novel_001682"; | exon_number | "1"; | gene_type | " |
| Dt_chr1 | Cufflinks | exon | 61684196 | 61684545 | . | + | . | gene_id | "XLOC_123173"; | transcript_id | "Novel_001682"; | exon_number | "2"; | gene_type | " |
| Dt_chr1 | Cufflinks | exon | 64083744 | 64083999 | . | + | . | gene_id | "XLOC_123326"; | transcript_id | "Novel_001683"; | exon_number | "1"; | gene_type | " |
| Dt_chr1 | Cufflinks | exon | 64084891 | 64085549 | . | + | . | gene_id | "XLOC_123326"; | transcript_id | "Novel_001683"; | exon_number | "2"; | gene_type | " |
| Dt_chr1 | Cufflinks | exon | 64085802 | 64086637 | . | + | . | gene_id | "XLOC_123326"; | transcript_id | "Novel_001683"; | exon_number | "3"; | gene_type | " |
| Dt_chr1 | Cufflinks | exon | 64083744 | 64083999 | . | + | . | gene_id | "XLOC_123326"; | transcript_id | "Novel_001684"; | exon_number | "1"; | gene_type | " |
| Dt_chr1 | Cufflinks | exon | 64084891 | 64086637 | . | + | . | gene_id | "XLOC_123326"; | transcript_id | "Novel_001684"; | exon_number | "2"; | gene_type | " |
| Dt_chr1 | Cufflinks | exon | 64084261 | 64085549 | . | + | . | gene_id | "XLOC_123326"; | transcript_id | "Novel_001685"; | exon_number | "1"; | gene_type | " |
| Dt_chr1 | Cufflinks | exon | 64085802 | 64086154 | . | + | . | gene_id | "XLOC_123326"; | transcript_id | "Novel_001685"; | exon_number | "2"; | gene_type | " |
| Dt_chr1 | Cufflinks | exon | 71612664 | 71613054 | . | + | . | gene_id | "XLOC_123718"; | transcript_id | "Novel_001686"; | exon_number | "1"; | gene_type | " |
| Dt_chr1 | Cufflinks | exon | 71613416 | 71613692 | . | + | . | gene_id | "XLOC_123718"; | transcript_id | "Novel_001686"; | exon_number | "2"; | gene_type | " |
| Dt_chr1 | Cufflinks | exon | 72369079 | 72369379 | . | + | . | gene_id | "XLOC_123747"; | transcript_id | "Novel_001687"; | exon_number | "1"; | gene_type | " |
| Dt_chr1 | Cufflinks | exon | 72369687 | 72369747 | . | + | . | gene_id | "XLOC_123747"; | transcript_id | "Novel_001687"; | exon_number | "2"; | gene_type | " |
| Dt_chr1 | Cufflinks | exon | 75302705 | 75302888 | . | + | . | gene_id | "XLOC_123898"; | transcript_id | "Novel_001688"; | exon_number | "1"; | gene_type | " |
| Dt_chr1 | Cufflinks | exon | 75303343 | 75303400 | . | + | . | gene_id | "XLOC_123898"; | transcript_id | "Novel_001688"; | exon_number | "2"; | gene_type | " |
| Dt_chr1 | Cufflinks | exon | 75306495 | 75308370 | . | + | . | gene_id | "XLOC_123898"; | transcript_id | "Novel_001688"; | exon_number | "3"; | gene_type | " |
| Dt_chr1 | Cufflinks | exon | 75302778 | 75302888 | . | + | . | gene_id | "XLOC_123898"; | transcript_id | "Novel_001689"; | exon_number | "1"; | gene_type | " |
| Dt_chr1 | Cufflinks | exon | 75306495 | 75308343 | . | + | . | gene_id | "XLOC_123898"; | transcript_id | "Novel_001689"; | exon_number | "2"; | gene_type | " |
| Dt_chr1 | Cufflinks | exon | 76184594 | 76184859 | . | + | . | gene_id | "XLOC_123963"; | transcript_id | "Novel_001690"; | exon_number | "1"; | gene_type | " |
| Dt_chr1 | Cufflinks | exon | 76185148 | 76185261 | . | + | . | gene_id | "XLOC_123963"; | transcript_id | "Novel_001690"; | exon_number | "2"; | gene_type | " |
| Dt_chr1 | Cufflinks | exon | 76185791 | 76185886 | . | + | . | gene_id | "XLOC_123963"; | transcript_id | "Novel_001690"; | exon_number | "3"; | gene_type | " |
| Dt_chr1 | Cufflinks | exon | 76186111 | 76186153 | . | + | . | gene_id | "XLOC_123963"; | transcript_id | "Novel_001690"; | exon_number | "4"; | gene_type | " |

|         |           |      |          |          |   |   |   |         |                |               |                 |             |      |           |   |
|---------|-----------|------|----------|----------|---|---|---|---------|----------------|---------------|-----------------|-------------|------|-----------|---|
| Dt_chr1 | Cufflinks | exon | 76186239 | 76188974 | . | + | . | gene_id | "XLOC_123963"; | transcript_id | "Novel_001690"; | exon_number | "5"; | gene_type | " |
| Dt_chr1 | Cufflinks | exon | 76184622 | 76184859 | . | + | . | gene_id | "XLOC_123963"; | transcript_id | "Novel_001691"; | exon_number | "1"; | gene_type | " |
| Dt_chr1 | Cufflinks | exon | 76185148 | 76185261 | . | + | . | gene_id | "XLOC_123963"; | transcript_id | "Novel_001691"; | exon_number | "2"; | gene_type | " |
| Dt_chr1 | Cufflinks | exon | 76185791 | 76185886 | . | + | . | gene_id | "XLOC_123963"; | transcript_id | "Novel_001691"; | exon_number | "3"; | gene_type | " |
| Dt_chr1 | Cufflinks | exon | 76186111 | 76186153 | . | + | . | gene_id | "XLOC_123963"; | transcript_id | "Novel_001691"; | exon_number | "4"; | gene_type | " |
| Dt_chr1 | Cufflinks | exon | 76186239 | 76186550 | . | + | . | gene_id | "XLOC_123963"; | transcript_id | "Novel_001691"; | exon_number | "5"; | gene_type | " |
| Dt_chr1 | Cufflinks | exon | 76188206 | 76188304 | . | + | . | gene_id | "XLOC_123963"; | transcript_id | "Novel_001691"; | exon_number | "6"; | gene_type | " |
| Dt_chr1 | Cufflinks | exon | 76188426 | 76188973 | . | + | . | gene_id | "XLOC_123963"; | transcript_id | "Novel_001691"; | exon_number | "7"; | gene_type | " |
| Dt_chr1 | Cufflinks | exon | 76184626 | 76184859 | . | + | . | gene_id | "XLOC_123963"; | transcript_id | "Novel_001692"; | exon_number | "1"; | gene_type | " |
| Dt_chr1 | Cufflinks | exon | 76185148 | 76185261 | . | + | . | gene_id | "XLOC_123963"; | transcript_id | "Novel_001692"; | exon_number | "2"; | gene_type | " |
| Dt_chr1 | Cufflinks | exon | 76185791 | 76185886 | . | + | . | gene_id | "XLOC_123963"; | transcript_id | "Novel_001692"; | exon_number | "3"; | gene_type | " |
| Dt_chr1 | Cufflinks | exon | 76186111 | 76186153 | . | + | . | gene_id | "XLOC_123963"; | transcript_id | "Novel_001692"; | exon_number | "4"; | gene_type | " |
| Dt_chr1 | Cufflinks | exon | 76186239 | 76186394 | . | + | . | gene_id | "XLOC_123963"; | transcript_id | "Novel_001692"; | exon_number | "5"; | gene_type | " |
| Dt_chr1 | Cufflinks | exon | 76186470 | 76186550 | . | + | . | gene_id | "XLOC_123963"; | transcript_id | "Novel_001692"; | exon_number | "6"; | gene_type | " |
| Dt_chr1 | Cufflinks | exon | 76188206 | 76188304 | . | + | . | gene_id | "XLOC_123963"; | transcript_id | "Novel_001692"; | exon_number | "7"; | gene_type | " |
| Dt_chr1 | Cufflinks | exon | 76188426 | 76188976 | . | + | . | gene_id | "XLOC_123963"; | transcript_id | "Novel_001692"; | exon_number | "8"; | gene_type | " |
| Dt_chr1 | Cufflinks | exon | 76422371 | 76422594 | . | + | . | gene_id | "XLOC_123979"; | transcript_id | "Novel_001693"; | exon_number | "1"; | gene_type | " |
| Dt_chr1 | Cufflinks | exon | 76621827 | 76622060 | . | + | . | gene_id | "XLOC_124005"; | transcript_id | "Novel_001694"; | exon_number | "1"; | gene_type | " |
| Dt_chr1 | Cufflinks | exon | 76625702 | 76625968 | . | + | . | gene_id | "XLOC_124005"; | transcript_id | "Novel_001694"; | exon_number | "2"; | gene_type | " |
| Dt_chr1 | Cufflinks | exon | 76626063 | 76626431 | . | + | . | gene_id | "XLOC_124005"; | transcript_id | "Novel_001694"; | exon_number | "3"; | gene_type | " |
| Dt_chr1 | Cufflinks | exon | 80025150 | 80025351 | . | + | . | gene_id | "XLOC_124263"; | transcript_id | "Novel_001695"; | exon_number | "1"; | gene_type | " |
| Dt_chr1 | Cufflinks | exon | 80027151 | 80027962 | . | + | . | gene_id | "XLOC_124263"; | transcript_id | "Novel_001695"; | exon_number | "2"; | gene_type | " |
| Dt_chr1 | Cufflinks | exon | 85466680 | 85471562 | . | + | . | gene_id | "XLOC_124725"; | transcript_id | "Novel_001696"; | exon_number | "1"; | gene_type | " |
| Dt_chr1 | Cufflinks | exon | 85471690 | 85472128 | . | + | . | gene_id | "XLOC_124725"; | transcript_id | "Novel_001696"; | exon_number | "2"; | gene_type | " |
| Dt_chr1 | Cufflinks | exon | 85472228 | 85472542 | . | + | . | gene_id | "XLOC_124725"; | transcript_id | "Novel_001696"; | exon_number | "3"; | gene_type | " |
| Dt_chr1 | Cufflinks | exon | 85466688 | 85467576 | . | + | . | gene_id | "XLOC_124725"; | transcript_id | "Novel_001697"; | exon_number | "1"; | gene_type | " |
| Dt_chr1 | Cufflinks | exon | 85470857 | 85471562 | . | + | . | gene_id | "XLOC_124725"; | transcript_id | "Novel_001697"; | exon_number | "2"; | gene_type | " |
| Dt_chr1 | Cufflinks | exon | 85471690 | 85472128 | . | + | . | gene_id | "XLOC_124725"; | transcript_id | "Novel_001697"; | exon_number | "3"; | gene_type | " |
| Dt_chr1 | Cufflinks | exon | 85472228 | 85472459 | . | + | . | gene_id | "XLOC_124725"; | transcript_id | "Novel_001697"; | exon_number | "4"; | gene_type | " |
| Dt_chr1 | Cufflinks | exon | 90325519 | 90326843 | . | + | . | gene_id | "XLOC_124932"; | transcript_id | "Novel_001698"; | exon_number | "1"; | gene_type | " |
| Dt_chr1 | Cufflinks | exon | 90338102 | 90338166 | . | + | . | gene_id | "XLOC_124932"; | transcript_id | "Novel_001698"; | exon_number | "2"; | gene_type | " |
| Dt_chr1 | Cufflinks | exon | 90338561 | 90338640 | . | + | . | gene_id | "XLOC_124932"; | transcript_id | "Novel_001698"; | exon_number | "3"; | gene_type | " |
| Dt_chr1 | Cufflinks | exon | 90339551 | 90339648 | . | + | . | gene_id | "XLOC_124932"; | transcript_id | "Novel_001698"; | exon_number | "4"; | gene_type | " |
| Dt_chr1 | Cufflinks | exon | 90339781 | 90339999 | . | + | . | gene_id | "XLOC_124932"; | transcript_id | "Novel_001698"; | exon_number | "5"; | gene_type | " |
| Dt_chr1 | Cufflinks | exon | 1999653  | 2000955  | . | - | . | gene_id | "XLOC_125315"; | transcript_id | "Novel_001699"; | exon_number | "1"; | gene_type | " |

|         |           |      |          |          |   |   |         |                |               |                 |             |      |           |   |
|---------|-----------|------|----------|----------|---|---|---------|----------------|---------------|-----------------|-------------|------|-----------|---|
| Dt_chr1 | Cufflinks | exon | 2002665  | 2002778  | . | . | gene_id | "XLOC_125315"; | transcript_id | "Novel_001699"; | exon_number | "2"; | gene_type | " |
| Dt_chr1 | Cufflinks | exon | 2002861  | 2003151  | . | . | gene_id | "XLOC_125315"; | transcript_id | "Novel_001699"; | exon_number | "3"; | gene_type | " |
| Dt_chr1 | Cufflinks | exon | 2004138  | 2004445  | . | . | gene_id | "XLOC_125315"; | transcript_id | "Novel_001699"; | exon_number | "4"; | gene_type | " |
| Dt_chr1 | Cufflinks | exon | 2004758  | 2005643  | . | . | gene_id | "XLOC_125315"; | transcript_id | "Novel_001699"; | exon_number | "5"; | gene_type | " |
| Dt_chr1 | Cufflinks | exon | 2000112  | 2002778  | . | . | gene_id | "XLOC_125315"; | transcript_id | "Novel_001700"; | exon_number | "1"; | gene_type | " |
| Dt_chr1 | Cufflinks | exon | 2002861  | 2005675  | . | . | gene_id | "XLOC_125315"; | transcript_id | "Novel_001700"; | exon_number | "2"; | gene_type | " |
| Dt_chr1 | Cufflinks | exon | 4667806  | 4668244  | . | . | gene_id | "XLOC_125466"; | transcript_id | "Novel_001701"; | exon_number | "1"; | gene_type | " |
| Dt_chr1 | Cufflinks | exon | 4669677  | 4670131  | . | . | gene_id | "XLOC_125466"; | transcript_id | "Novel_001701"; | exon_number | "2"; | gene_type | " |
| Dt_chr1 | Cufflinks | exon | 4670271  | 4670507  | . | . | gene_id | "XLOC_125466"; | transcript_id | "Novel_001701"; | exon_number | "3"; | gene_type | " |
| Dt_chr1 | Cufflinks | exon | 4667815  | 4670131  | . | . | gene_id | "XLOC_125466"; | transcript_id | "Novel_001702"; | exon_number | "1"; | gene_type | " |
| Dt_chr1 | Cufflinks | exon | 4670271  | 4670499  | . | . | gene_id | "XLOC_125466"; | transcript_id | "Novel_001702"; | exon_number | "2"; | gene_type | " |
| Dt_chr1 | Cufflinks | exon | 5163338  | 5163856  | . | . | gene_id | "XLOC_125498"; | transcript_id | "Novel_001703"; | exon_number | "1"; | gene_type | " |
| Dt_chr1 | Cufflinks | exon | 5164004  | 5164274  | . | . | gene_id | "XLOC_125498"; | transcript_id | "Novel_001703"; | exon_number | "2"; | gene_type | " |
| Dt_chr1 | Cufflinks | exon | 24524685 | 24527708 | . | . | gene_id | "XLOC_126159"; | transcript_id | "Novel_001704"; | exon_number | "1"; | gene_type | " |
| Dt_chr1 | Cufflinks | exon | 24527851 | 24528211 | . | . | gene_id | "XLOC_126159"; | transcript_id | "Novel_001704"; | exon_number | "2"; | gene_type | " |
| Dt_chr1 | Cufflinks | exon | 24528294 | 24529535 | . | . | gene_id | "XLOC_126159"; | transcript_id | "Novel_001704"; | exon_number | "3"; | gene_type | " |
| Dt_chr1 | Cufflinks | exon | 24524959 | 24528211 | . | . | gene_id | "XLOC_126159"; | transcript_id | "Novel_001705"; | exon_number | "1"; | gene_type | " |
| Dt_chr1 | Cufflinks | exon | 24528294 | 24528375 | . | . | gene_id | "XLOC_126159"; | transcript_id | "Novel_001705"; | exon_number | "2"; | gene_type | " |
| Dt_chr1 | Cufflinks | exon | 24528474 | 24529295 | . | . | gene_id | "XLOC_126159"; | transcript_id | "Novel_001705"; | exon_number | "3"; | gene_type | " |
| Dt_chr1 | Cufflinks | exon | 24524971 | 24527708 | . | . | gene_id | "XLOC_126159"; | transcript_id | "Novel_001706"; | exon_number | "1"; | gene_type | " |
| Dt_chr1 | Cufflinks | exon | 24527851 | 24528211 | . | . | gene_id | "XLOC_126159"; | transcript_id | "Novel_001706"; | exon_number | "2"; | gene_type | " |
| Dt_chr1 | Cufflinks | exon | 24528294 | 24528375 | . | . | gene_id | "XLOC_126159"; | transcript_id | "Novel_001706"; | exon_number | "3"; | gene_type | " |
| Dt_chr1 | Cufflinks | exon | 24528474 | 24529236 | . | . | gene_id | "XLOC_126159"; | transcript_id | "Novel_001706"; | exon_number | "4"; | gene_type | " |
| Dt_chr1 | Cufflinks | exon | 27313942 | 27315161 | . | . | gene_id | "XLOC_126338"; | transcript_id | "Novel_001707"; | exon_number | "1"; | gene_type | " |
| Dt_chr1 | Cufflinks | exon | 27315258 | 27315294 | . | . | gene_id | "XLOC_126338"; | transcript_id | "Novel_001707"; | exon_number | "2"; | gene_type | " |
| Dt_chr1 | Cufflinks | exon | 27315458 | 27315575 | . | . | gene_id | "XLOC_126338"; | transcript_id | "Novel_001707"; | exon_number | "3"; | gene_type | " |
| Dt_chr1 | Cufflinks | exon | 27315906 | 27316035 | . | . | gene_id | "XLOC_126338"; | transcript_id | "Novel_001707"; | exon_number | "4"; | gene_type | " |
| Dt_chr1 | Cufflinks | exon | 27316132 | 27316357 | . | . | gene_id | "XLOC_126338"; | transcript_id | "Novel_001707"; | exon_number | "5"; | gene_type | " |
| Dt_chr1 | Cufflinks | exon | 27976260 | 27976666 | . | . | gene_id | "XLOC_126402"; | transcript_id | "Novel_001708"; | exon_number | "1"; | gene_type | " |
| Dt_chr1 | Cufflinks | exon | 27977903 | 27978067 | . | . | gene_id | "XLOC_126402"; | transcript_id | "Novel_001708"; | exon_number | "2"; | gene_type | " |
| Dt_chr1 | Cufflinks | exon | 33770113 | 33771507 | . | . | gene_id | "XLOC_126904"; | transcript_id | "Novel_001709"; | exon_number | "1"; | gene_type | " |
| Dt_chr1 | Cufflinks | exon | 33771797 | 33771915 | . | . | gene_id | "XLOC_126904"; | transcript_id | "Novel_001709"; | exon_number | "2"; | gene_type | " |
| Dt_chr1 | Cufflinks | exon | 36012196 | 36012290 | . | . | gene_id | "XLOC_127067"; | transcript_id | "Novel_001710"; | exon_number | "1"; | gene_type | " |
| Dt_chr1 | Cufflinks | exon | 36012366 | 36012422 | . | . | gene_id | "XLOC_127067"; | transcript_id | "Novel_001710"; | exon_number | "2"; | gene_type | " |
| Dt_chr1 | Cufflinks | exon | 36012551 | 36012613 | . | . | gene_id | "XLOC_127067"; | transcript_id | "Novel_001710"; | exon_number | "3"; | gene_type | " |



|         |           |      |          |          |   |   |   |         |                |               |                 |             |      |           |   |
|---------|-----------|------|----------|----------|---|---|---|---------|----------------|---------------|-----------------|-------------|------|-----------|---|
| Dt_chr1 | Cufflinks | exon | 36012720 | 36012790 | . | - | . | gene_id | "XLOC_127067"; | transcript_id | "Novel_001710"; | exon_number | "4"; | gene_type | " |
| Dt_chr1 | Cufflinks | exon | 36012878 | 36012986 | . | - | . | gene_id | "XLOC_127067"; | transcript_id | "Novel_001710"; | exon_number | "5"; | gene_type | " |
| Dt_chr1 | Cufflinks | exon | 36013694 | 36013889 | . | - | . | gene_id | "XLOC_127067"; | transcript_id | "Novel_001710"; | exon_number | "6"; | gene_type | " |
| Dt_chr1 | Cufflinks | exon | 36015462 | 36015609 | . | - | . | gene_id | "XLOC_127067"; | transcript_id | "Novel_001710"; | exon_number | "7"; | gene_type | " |
| Dt_chr1 | Cufflinks | exon | 37678781 | 37679796 | . | - | . | gene_id | "XLOC_127275"; | transcript_id | "Novel_001711"; | exon_number | "1"; | gene_type | " |
| Dt_chr1 | Cufflinks | exon | 37679882 | 37684284 | . | - | . | gene_id | "XLOC_127275"; | transcript_id | "Novel_001711"; | exon_number | "2"; | gene_type | " |
| Dt_chr1 | Cufflinks | exon | 40348346 | 40349751 | . | - | . | gene_id | "XLOC_127732"; | transcript_id | "Novel_001712"; | exon_number | "1"; | gene_type | " |
| Dt_chr1 | Cufflinks | exon | 40350037 | 40350341 | . | - | . | gene_id | "XLOC_127732"; | transcript_id | "Novel_001712"; | exon_number | "2"; | gene_type | " |
| Dt_chr1 | Cufflinks | exon | 40693811 | 40693949 | . | - | . | gene_id | "XLOC_127770"; | transcript_id | "Novel_001713"; | exon_number | "1"; | gene_type | " |
| Dt_chr1 | Cufflinks | exon | 40694849 | 40694959 | . | - | . | gene_id | "XLOC_127770"; | transcript_id | "Novel_001713"; | exon_number | "2"; | gene_type | " |
| Dt_chr1 | Cufflinks | exon | 40695864 | 40695969 | . | - | . | gene_id | "XLOC_127770"; | transcript_id | "Novel_001713"; | exon_number | "3"; | gene_type | " |
| Dt_chr1 | Cufflinks | exon | 40697507 | 40697877 | . | - | . | gene_id | "XLOC_127770"; | transcript_id | "Novel_001713"; | exon_number | "4"; | gene_type | " |
| Dt_chr1 | Cufflinks | exon | 40698088 | 40698281 | . | - | . | gene_id | "XLOC_127770"; | transcript_id | "Novel_001713"; | exon_number | "5"; | gene_type | " |
| Dt_chr1 | Cufflinks | exon | 40693812 | 40693949 | . | - | . | gene_id | "XLOC_127770"; | transcript_id | "Novel_001714"; | exon_number | "1"; | gene_type | " |
| Dt_chr1 | Cufflinks | exon | 40694849 | 40694959 | . | - | . | gene_id | "XLOC_127770"; | transcript_id | "Novel_001714"; | exon_number | "2"; | gene_type | " |
| Dt_chr1 | Cufflinks | exon | 40695864 | 40695969 | . | - | . | gene_id | "XLOC_127770"; | transcript_id | "Novel_001714"; | exon_number | "3"; | gene_type | " |
| Dt_chr1 | Cufflinks | exon | 40697507 | 40697965 | . | - | . | gene_id | "XLOC_127770"; | transcript_id | "Novel_001714"; | exon_number | "4"; | gene_type | " |
| Dt_chr1 | Cufflinks | exon | 40698088 | 40698324 | . | - | . | gene_id | "XLOC_127770"; | transcript_id | "Novel_001714"; | exon_number | "5"; | gene_type | " |
| Dt_chr1 | Cufflinks | exon | 40693812 | 40693949 | . | - | . | gene_id | "XLOC_127770"; | transcript_id | "Novel_001715"; | exon_number | "1"; | gene_type | " |
| Dt_chr1 | Cufflinks | exon | 40694849 | 40694959 | . | - | . | gene_id | "XLOC_127770"; | transcript_id | "Novel_001715"; | exon_number | "2"; | gene_type | " |
| Dt_chr1 | Cufflinks | exon | 40695864 | 40695969 | . | - | . | gene_id | "XLOC_127770"; | transcript_id | "Novel_001715"; | exon_number | "3"; | gene_type | " |
| Dt_chr1 | Cufflinks | exon | 40697507 | 40697543 | . | - | . | gene_id | "XLOC_127770"; | transcript_id | "Novel_001715"; | exon_number | "4"; | gene_type | " |
| Dt_chr1 | Cufflinks | exon | 40697619 | 40697877 | . | - | . | gene_id | "XLOC_127770"; | transcript_id | "Novel_001715"; | exon_number | "5"; | gene_type | " |
| Dt_chr1 | Cufflinks | exon | 40698088 | 40698324 | . | - | . | gene_id | "XLOC_127770"; | transcript_id | "Novel_001715"; | exon_number | "6"; | gene_type | " |
| Dt_chr1 | Cufflinks | exon | 40697159 | 40697965 | . | - | . | gene_id | "XLOC_127770"; | transcript_id | "Novel_001716"; | exon_number | "1"; | gene_type | " |
| Dt_chr1 | Cufflinks | exon | 40698088 | 40698237 | . | - | . | gene_id | "XLOC_127770"; | transcript_id | "Novel_001716"; | exon_number | "2"; | gene_type | " |
| Dt_chr1 | Cufflinks | exon | 40714118 | 40714521 | . | - | . | gene_id | "XLOC_127781"; | transcript_id | "Novel_001717"; | exon_number | "1"; | gene_type | " |
| Dt_chr1 | Cufflinks | exon | 40714607 | 40714675 | . | - | . | gene_id | "XLOC_127781"; | transcript_id | "Novel_001717"; | exon_number | "2"; | gene_type | " |
| Dt_chr1 | Cufflinks | exon | 40715780 | 40715906 | . | - | . | gene_id | "XLOC_127781"; | transcript_id | "Novel_001717"; | exon_number | "3"; | gene_type | " |
| Dt_chr1 | Cufflinks | exon | 40716011 | 40716118 | . | - | . | gene_id | "XLOC_127781"; | transcript_id | "Novel_001717"; | exon_number | "4"; | gene_type | " |
| Dt_chr1 | Cufflinks | exon | 40716205 | 40716348 | . | - | . | gene_id | "XLOC_127781"; | transcript_id | "Novel_001717"; | exon_number | "5"; | gene_type | " |
| Dt_chr1 | Cufflinks | exon | 40714166 | 40714521 | . | - | . | gene_id | "XLOC_127781"; | transcript_id | "Novel_001718"; | exon_number | "1"; | gene_type | " |
| Dt_chr1 | Cufflinks | exon | 40714607 | 40715769 | . | - | . | gene_id | "XLOC_127781"; | transcript_id | "Novel_001718"; | exon_number | "2"; | gene_type | " |
| Dt_chr1 | Cufflinks | exon | 40818530 | 40818791 | . | - | . | gene_id | "XLOC_127799"; | transcript_id | "Novel_001719"; | exon_number | "1"; | gene_type | " |
| Dt_chr1 | Cufflinks | exon | 40818881 | 40819073 | . | - | . | gene_id | "XLOC_127799"; | transcript_id | "Novel_001719"; | exon_number | "2"; | gene_type | " |

|         |           |      |          |          |   |   |   |         |                |               |                 |             |      |           |   |
|---------|-----------|------|----------|----------|---|---|---|---------|----------------|---------------|-----------------|-------------|------|-----------|---|
| Dt_chr1 | Cufflinks | exon | 40821843 | 40822330 | . | - | . | gene_id | "XLOC_127799"; | transcript_id | "Novel_001719"; | exon_number | "3"; | gene_type | " |
| Dt_chr1 | Cufflinks | exon | 40851844 | 40852846 | . | - | . | gene_id | "XLOC_127804"; | transcript_id | "Novel_001720"; | exon_number | "1"; | gene_type | " |
| Dt_chr1 | Cufflinks | exon | 40852945 | 40853399 | . | - | . | gene_id | "XLOC_127804"; | transcript_id | "Novel_001720"; | exon_number | "2"; | gene_type | " |
| Dt_chr1 | Cufflinks | exon | 40853501 | 40853700 | . | - | . | gene_id | "XLOC_127805"; | transcript_id | "Novel_001721"; | exon_number | "1"; | gene_type | " |
| Dt_chr1 | Cufflinks | exon | 40853791 | 40853883 | . | - | . | gene_id | "XLOC_127805"; | transcript_id | "Novel_001721"; | exon_number | "2"; | gene_type | " |
| Dt_chr1 | Cufflinks | exon | 40853983 | 40854267 | . | - | . | gene_id | "XLOC_127805"; | transcript_id | "Novel_001721"; | exon_number | "3"; | gene_type | " |
| Dt_chr1 | Cufflinks | exon | 40853735 | 40853883 | . | - | . | gene_id | "XLOC_127805"; | transcript_id | "Novel_001722"; | exon_number | "1"; | gene_type | " |
| Dt_chr1 | Cufflinks | exon | 40853983 | 40854233 | . | - | . | gene_id | "XLOC_127805"; | transcript_id | "Novel_001722"; | exon_number | "2"; | gene_type | " |
| Dt_chr1 | Cufflinks | exon | 40936504 | 40937444 | . | - | . | gene_id | "XLOC_127823"; | transcript_id | "Novel_001723"; | exon_number | "1"; | gene_type | " |
| Dt_chr1 | Cufflinks | exon | 41014132 | 41014711 | . | - | . | gene_id | "XLOC_127835"; | transcript_id | "Novel_001724"; | exon_number | "1"; | gene_type | " |
| Dt_chr1 | Cufflinks | exon | 41015167 | 41015376 | . | - | . | gene_id | "XLOC_127835"; | transcript_id | "Novel_001724"; | exon_number | "2"; | gene_type | " |
| Dt_chr1 | Cufflinks | exon | 41015460 | 41016094 | . | - | . | gene_id | "XLOC_127835"; | transcript_id | "Novel_001724"; | exon_number | "3"; | gene_type | " |
| Dt_chr1 | Cufflinks | exon | 41014615 | 41014711 | . | - | . | gene_id | "XLOC_127835"; | transcript_id | "Novel_001725"; | exon_number | "1"; | gene_type | " |
| Dt_chr1 | Cufflinks | exon | 41015167 | 41016137 | . | - | . | gene_id | "XLOC_127835"; | transcript_id | "Novel_001725"; | exon_number | "2"; | gene_type | " |
| Dt_chr1 | Cufflinks | exon | 41034381 | 41035071 | . | - | . | gene_id | "XLOC_127838"; | transcript_id | "Novel_001726"; | exon_number | "1"; | gene_type | " |
| Dt_chr1 | Cufflinks | exon | 41035910 | 41036232 | . | - | . | gene_id | "XLOC_127838"; | transcript_id | "Novel_001726"; | exon_number | "2"; | gene_type | " |
| Dt_chr1 | Cufflinks | exon | 41037537 | 41037742 | . | - | . | gene_id | "XLOC_127838"; | transcript_id | "Novel_001726"; | exon_number | "3"; | gene_type | " |
| Dt_chr1 | Cufflinks | exon | 41137540 | 41137642 | . | - | . | gene_id | "XLOC_127862"; | transcript_id | "Novel_001727"; | exon_number | "1"; | gene_type | " |
| Dt_chr1 | Cufflinks | exon | 41137750 | 41137885 | . | - | . | gene_id | "XLOC_127862"; | transcript_id | "Novel_001727"; | exon_number | "2"; | gene_type | " |
| Dt_chr1 | Cufflinks | exon | 41383903 | 41384706 | . | - | . | gene_id | "XLOC_127906"; | transcript_id | "Novel_001728"; | exon_number | "1"; | gene_type | " |
| Dt_chr1 | Cufflinks | exon | 41384795 | 41384926 | . | - | . | gene_id | "XLOC_127906"; | transcript_id | "Novel_001728"; | exon_number | "2"; | gene_type | " |
| Dt_chr1 | Cufflinks | exon | 41385508 | 41385529 | . | - | . | gene_id | "XLOC_127906"; | transcript_id | "Novel_001728"; | exon_number | "3"; | gene_type | " |
| Dt_chr1 | Cufflinks | exon | 41391584 | 41391819 | . | - | . | gene_id | "XLOC_127908"; | transcript_id | "Novel_001729"; | exon_number | "1"; | gene_type | " |
| Dt_chr1 | Cufflinks | exon | 41391959 | 41392057 | . | - | . | gene_id | "XLOC_127908"; | transcript_id | "Novel_001729"; | exon_number | "2"; | gene_type | " |
| Dt_chr1 | Cufflinks | exon | 41392506 | 41392603 | . | - | . | gene_id | "XLOC_127908"; | transcript_id | "Novel_001729"; | exon_number | "3"; | gene_type | " |
| Dt_chr1 | Cufflinks | exon | 41420402 | 41420437 | . | - | . | gene_id | "XLOC_127916"; | transcript_id | "Novel_001730"; | exon_number | "1"; | gene_type | " |
| Dt_chr1 | Cufflinks | exon | 41420823 | 41421560 | . | - | . | gene_id | "XLOC_127916"; | transcript_id | "Novel_001730"; | exon_number | "2"; | gene_type | " |
| Dt_chr1 | Cufflinks | exon | 41421665 | 41421877 | . | - | . | gene_id | "XLOC_127916"; | transcript_id | "Novel_001730"; | exon_number | "3"; | gene_type | " |
| Dt_chr1 | Cufflinks | exon | 41420405 | 41420437 | . | - | . | gene_id | "XLOC_127916"; | transcript_id | "Novel_001731"; | exon_number | "1"; | gene_type | " |
| Dt_chr1 | Cufflinks | exon | 41420823 | 41421428 | . | - | . | gene_id | "XLOC_127916"; | transcript_id | "Novel_001731"; | exon_number | "2"; | gene_type | " |
| Dt_chr1 | Cufflinks | exon | 41421493 | 41421560 | . | - | . | gene_id | "XLOC_127916"; | transcript_id | "Novel_001731"; | exon_number | "3"; | gene_type | " |
| Dt_chr1 | Cufflinks | exon | 41421665 | 41421940 | . | - | . | gene_id | "XLOC_127916"; | transcript_id | "Novel_001731"; | exon_number | "4"; | gene_type | " |
| Dt_chr1 | Cufflinks | exon | 41420634 | 41421560 | . | - | . | gene_id | "XLOC_127916"; | transcript_id | "Novel_001732"; | exon_number | "1"; | gene_type | " |
| Dt_chr1 | Cufflinks | exon | 41421665 | 41421940 | . | - | . | gene_id | "XLOC_127916"; | transcript_id | "Novel_001732"; | exon_number | "2"; | gene_type | " |
| Dt_chr1 | Cufflinks | exon | 41420634 | 41421419 | . | - | . | gene_id | "XLOC_127916"; | transcript_id | "Novel_001733"; | exon_number | "1"; | gene_type | " |

|         |           |      |          |          |   |   |   |         |                |               |                 |             |      |           |   |
|---------|-----------|------|----------|----------|---|---|---|---------|----------------|---------------|-----------------|-------------|------|-----------|---|
| Dt_chr1 | Cufflinks | exon | 41421493 | 41421560 | . | - | . | gene_id | "XLOC_127916"; | transcript_id | "Novel_001733"; | exon_number | "2"; | gene_type | " |
| Dt_chr1 | Cufflinks | exon | 41421665 | 41421940 | . | - | . | gene_id | "XLOC_127916"; | transcript_id | "Novel_001733"; | exon_number | "3"; | gene_type | " |
| Dt_chr1 | Cufflinks | exon | 41461336 | 41462507 | . | - | . | gene_id | "XLOC_127920"; | transcript_id | "Novel_001734"; | exon_number | "1"; | gene_type | " |
| Dt_chr1 | Cufflinks | exon | 41462601 | 41462826 | . | - | . | gene_id | "XLOC_127920"; | transcript_id | "Novel_001734"; | exon_number | "2"; | gene_type | " |
| Dt_chr1 | Cufflinks | exon | 41464367 | 41466121 | . | - | . | gene_id | "XLOC_127920"; | transcript_id | "Novel_001734"; | exon_number | "3"; | gene_type | " |
| Dt_chr1 | Cufflinks | exon | 41466371 | 41468903 | . | - | . | gene_id | "XLOC_127920"; | transcript_id | "Novel_001734"; | exon_number | "4"; | gene_type | " |
| Dt_chr1 | Cufflinks | exon | 41469053 | 41469274 | . | - | . | gene_id | "XLOC_127920"; | transcript_id | "Novel_001734"; | exon_number | "5"; | gene_type | " |
| Dt_chr1 | Cufflinks | exon | 41461386 | 41462503 | . | - | . | gene_id | "XLOC_127920"; | transcript_id | "Novel_001735"; | exon_number | "1"; | gene_type | " |
| Dt_chr1 | Cufflinks | exon | 41462601 | 41462826 | . | - | . | gene_id | "XLOC_127920"; | transcript_id | "Novel_001735"; | exon_number | "2"; | gene_type | " |
| Dt_chr1 | Cufflinks | exon | 41464367 | 41466121 | . | - | . | gene_id | "XLOC_127920"; | transcript_id | "Novel_001735"; | exon_number | "3"; | gene_type | " |
| Dt_chr1 | Cufflinks | exon | 41466371 | 41467444 | . | - | . | gene_id | "XLOC_127920"; | transcript_id | "Novel_001735"; | exon_number | "4"; | gene_type | " |
| Dt_chr1 | Cufflinks | exon | 41807568 | 41810412 | . | - | . | gene_id | "XLOC_127968"; | transcript_id | "Novel_001736"; | exon_number | "1"; | gene_type | " |
| Dt_chr1 | Cufflinks | exon | 41810570 | 41810951 | . | - | . | gene_id | "XLOC_127968"; | transcript_id | "Novel_001736"; | exon_number | "2"; | gene_type | " |
| Dt_chr1 | Cufflinks | exon | 41807875 | 41810429 | . | - | . | gene_id | "XLOC_127968"; | transcript_id | "Novel_001737"; | exon_number | "1"; | gene_type | " |
| Dt_chr1 | Cufflinks | exon | 41810570 | 41810963 | . | - | . | gene_id | "XLOC_127968"; | transcript_id | "Novel_001737"; | exon_number | "2"; | gene_type | " |
| Dt_chr1 | Cufflinks | exon | 41966430 | 41967200 | . | - | . | gene_id | "XLOC_127990"; | transcript_id | "Novel_001738"; | exon_number | "1"; | gene_type | " |
| Dt_chr1 | Cufflinks | exon | 41967281 | 41967621 | . | - | . | gene_id | "XLOC_127990"; | transcript_id | "Novel_001738"; | exon_number | "2"; | gene_type | " |
| Dt_chr1 | Cufflinks | exon | 41967702 | 41968249 | . | - | . | gene_id | "XLOC_127990"; | transcript_id | "Novel_001738"; | exon_number | "3"; | gene_type | " |
| Dt_chr1 | Cufflinks | exon | 41968359 | 41968576 | . | - | . | gene_id | "XLOC_127990"; | transcript_id | "Novel_001738"; | exon_number | "4"; | gene_type | " |
| Dt_chr1 | Cufflinks | exon | 41969688 | 41969790 | . | - | . | gene_id | "XLOC_127990"; | transcript_id | "Novel_001738"; | exon_number | "5"; | gene_type | " |
| Dt_chr1 | Cufflinks | exon | 41969896 | 41970175 | . | - | . | gene_id | "XLOC_127990"; | transcript_id | "Novel_001738"; | exon_number | "6"; | gene_type | " |
| Dt_chr1 | Cufflinks | exon | 41966476 | 41967200 | . | - | . | gene_id | "XLOC_127990"; | transcript_id | "Novel_001739"; | exon_number | "1"; | gene_type | " |
| Dt_chr1 | Cufflinks | exon | 41967281 | 41967621 | . | - | . | gene_id | "XLOC_127990"; | transcript_id | "Novel_001739"; | exon_number | "2"; | gene_type | " |
| Dt_chr1 | Cufflinks | exon | 41967702 | 41968576 | . | - | . | gene_id | "XLOC_127990"; | transcript_id | "Novel_001739"; | exon_number | "3"; | gene_type | " |
| Dt_chr1 | Cufflinks | exon | 41969688 | 41969790 | . | - | . | gene_id | "XLOC_127990"; | transcript_id | "Novel_001739"; | exon_number | "4"; | gene_type | " |
| Dt_chr1 | Cufflinks | exon | 41969896 | 41970106 | . | - | . | gene_id | "XLOC_127990"; | transcript_id | "Novel_001739"; | exon_number | "5"; | gene_type | " |
| Dt_chr1 | Cufflinks | exon | 41966534 | 41967200 | . | - | . | gene_id | "XLOC_127990"; | transcript_id | "Novel_001740"; | exon_number | "1"; | gene_type | " |
| Dt_chr1 | Cufflinks | exon | 41967281 | 41967621 | . | - | . | gene_id | "XLOC_127990"; | transcript_id | "Novel_001740"; | exon_number | "2"; | gene_type | " |
| Dt_chr1 | Cufflinks | exon | 41967702 | 41968249 | . | - | . | gene_id | "XLOC_127990"; | transcript_id | "Novel_001740"; | exon_number | "3"; | gene_type | " |
| Dt_chr1 | Cufflinks | exon | 41968359 | 41968576 | . | - | . | gene_id | "XLOC_127990"; | transcript_id | "Novel_001740"; | exon_number | "4"; | gene_type | " |
| Dt_chr1 | Cufflinks | exon | 41969688 | 41969995 | . | - | . | gene_id | "XLOC_127990"; | transcript_id | "Novel_001740"; | exon_number | "5"; | gene_type | " |
| Dt_chr1 | Cufflinks | exon | 42116823 | 42117725 | . | - | . | gene_id | "XLOC_128025"; | transcript_id | "Novel_001741"; | exon_number | "1"; | gene_type | " |
| Dt_chr1 | Cufflinks | exon | 42117823 | 42118229 | . | - | . | gene_id | "XLOC_128025"; | transcript_id | "Novel_001741"; | exon_number | "2"; | gene_type | " |
| Dt_chr1 | Cufflinks | exon | 42118322 | 42118634 | . | - | . | gene_id | "XLOC_128025"; | transcript_id | "Novel_001741"; | exon_number | "3"; | gene_type | " |
| Dt_chr1 | Cufflinks | exon | 42118722 | 42120185 | . | - | . | gene_id | "XLOC_128025"; | transcript_id | "Novel_001741"; | exon_number | "4"; | gene_type | " |

|         |           |      |          |          |   |   |         |                |               |                 |             |      |           |   |
|---------|-----------|------|----------|----------|---|---|---------|----------------|---------------|-----------------|-------------|------|-----------|---|
| Dt_chr1 | Cufflinks | exon | 42116823 | 42117725 | . | . | gene_id | "XLOC_128025"; | transcript_id | "Novel_001742"; | exon_number | "1"; | gene_type | " |
| Dt_chr1 | Cufflinks | exon | 42117823 | 42118229 | . | . | gene_id | "XLOC_128025"; | transcript_id | "Novel_001742"; | exon_number | "2"; | gene_type | " |
| Dt_chr1 | Cufflinks | exon | 42118322 | 42118634 | . | . | gene_id | "XLOC_128025"; | transcript_id | "Novel_001742"; | exon_number | "3"; | gene_type | " |
| Dt_chr1 | Cufflinks | exon | 42118722 | 42120061 | . | . | gene_id | "XLOC_128025"; | transcript_id | "Novel_001742"; | exon_number | "4"; | gene_type | " |
| Dt_chr1 | Cufflinks | exon | 42122140 | 42122595 | . | . | gene_id | "XLOC_128025"; | transcript_id | "Novel_001742"; | exon_number | "5"; | gene_type | " |
| Dt_chr1 | Cufflinks | exon | 42117020 | 42117725 | . | . | gene_id | "XLOC_128025"; | transcript_id | "Novel_001743"; | exon_number | "1"; | gene_type | " |
| Dt_chr1 | Cufflinks | exon | 42117823 | 42120061 | . | . | gene_id | "XLOC_128025"; | transcript_id | "Novel_001743"; | exon_number | "2"; | gene_type | " |
| Dt_chr1 | Cufflinks | exon | 42122140 | 42122826 | . | . | gene_id | "XLOC_128025"; | transcript_id | "Novel_001743"; | exon_number | "3"; | gene_type | " |
| Dt_chr1 | Cufflinks | exon | 42117021 | 42117725 | . | . | gene_id | "XLOC_128025"; | transcript_id | "Novel_001744"; | exon_number | "1"; | gene_type | " |
| Dt_chr1 | Cufflinks | exon | 42117823 | 42118229 | . | . | gene_id | "XLOC_128025"; | transcript_id | "Novel_001744"; | exon_number | "2"; | gene_type | " |
| Dt_chr1 | Cufflinks | exon | 42118322 | 42120061 | . | . | gene_id | "XLOC_128025"; | transcript_id | "Novel_001744"; | exon_number | "3"; | gene_type | " |
| Dt_chr1 | Cufflinks | exon | 42122140 | 42122647 | . | . | gene_id | "XLOC_128025"; | transcript_id | "Novel_001744"; | exon_number | "4"; | gene_type | " |
| Dt_chr1 | Cufflinks | exon | 42170532 | 42171136 | . | . | gene_id | "XLOC_128038"; | transcript_id | "Novel_001745"; | exon_number | "1"; | gene_type | " |
| Dt_chr1 | Cufflinks | exon | 42171213 | 42171378 | . | . | gene_id | "XLOC_128038"; | transcript_id | "Novel_001745"; | exon_number | "2"; | gene_type | " |
| Dt_chr1 | Cufflinks | exon | 42171478 | 42171657 | . | . | gene_id | "XLOC_128038"; | transcript_id | "Novel_001745"; | exon_number | "3"; | gene_type | " |
| Dt_chr1 | Cufflinks | exon | 42171793 | 42172127 | . | . | gene_id | "XLOC_128038"; | transcript_id | "Novel_001745"; | exon_number | "4"; | gene_type | " |
| Dt_chr1 | Cufflinks | exon | 42175311 | 42175779 | . | . | gene_id | "XLOC_128039"; | transcript_id | "Novel_001746"; | exon_number | "1"; | gene_type | " |
| Dt_chr1 | Cufflinks | exon | 42176489 | 42176563 | . | . | gene_id | "XLOC_128039"; | transcript_id | "Novel_001746"; | exon_number | "2"; | gene_type | " |
| Dt_chr1 | Cufflinks | exon | 42176641 | 42176703 | . | . | gene_id | "XLOC_128039"; | transcript_id | "Novel_001746"; | exon_number | "3"; | gene_type | " |
| Dt_chr1 | Cufflinks | exon | 42176952 | 42177176 | . | . | gene_id | "XLOC_128039"; | transcript_id | "Novel_001746"; | exon_number | "4"; | gene_type | " |
| Dt_chr1 | Cufflinks | exon | 42177479 | 42177620 | . | . | gene_id | "XLOC_128039"; | transcript_id | "Novel_001746"; | exon_number | "5"; | gene_type | " |
| Dt_chr1 | Cufflinks | exon | 42177702 | 42177863 | . | . | gene_id | "XLOC_128039"; | transcript_id | "Novel_001746"; | exon_number | "6"; | gene_type | " |
| Dt_chr1 | Cufflinks | exon | 42178071 | 42178243 | . | . | gene_id | "XLOC_128039"; | transcript_id | "Novel_001746"; | exon_number | "7"; | gene_type | " |
| Dt_chr1 | Cufflinks | exon | 42178485 | 42179174 | . | . | gene_id | "XLOC_128039"; | transcript_id | "Novel_001746"; | exon_number | "8"; | gene_type | " |
| Dt_chr1 | Cufflinks | exon | 42225506 | 42226118 | . | . | gene_id | "XLOC_128048"; | transcript_id | "Novel_001747"; | exon_number | "1"; | gene_type | " |
| Dt_chr1 | Cufflinks | exon | 42226197 | 42226759 | . | . | gene_id | "XLOC_128048"; | transcript_id | "Novel_001747"; | exon_number | "2"; | gene_type | " |
| Dt_chr1 | Cufflinks | exon | 42293146 | 42293795 | . | . | gene_id | "XLOC_128061"; | transcript_id | "Novel_001748"; | exon_number | "1"; | gene_type | " |
| Dt_chr1 | Cufflinks | exon | 42294203 | 42294474 | . | . | gene_id | "XLOC_128061"; | transcript_id | "Novel_001748"; | exon_number | "2"; | gene_type | " |
| Dt_chr1 | Cufflinks | exon | 42294561 | 42295514 | . | . | gene_id | "XLOC_128061"; | transcript_id | "Novel_001748"; | exon_number | "3"; | gene_type | " |
| Dt_chr1 | Cufflinks | exon | 42295959 | 42296262 | . | . | gene_id | "XLOC_128061"; | transcript_id | "Novel_001748"; | exon_number | "4"; | gene_type | " |
| Dt_chr1 | Cufflinks | exon | 42296720 | 42297603 | . | . | gene_id | "XLOC_128061"; | transcript_id | "Novel_001748"; | exon_number | "5"; | gene_type | " |
| Dt_chr1 | Cufflinks | exon | 42297727 | 42297939 | . | . | gene_id | "XLOC_128061"; | transcript_id | "Novel_001748"; | exon_number | "6"; | gene_type | " |
| Dt_chr1 | Cufflinks | exon | 42298148 | 42298644 | . | . | gene_id | "XLOC_128061"; | transcript_id | "Novel_001748"; | exon_number | "7"; | gene_type | " |
| Dt_chr1 | Cufflinks | exon | 42298877 | 42299217 | . | . | gene_id | "XLOC_128061"; | transcript_id | "Novel_001748"; | exon_number | "8"; | gene_type | " |
| Dt_chr1 | Cufflinks | exon | 42302952 | 42303471 | . | . | gene_id | "XLOC_128064"; | transcript_id | "Novel_001749"; | exon_number | "1"; | gene_type | " |



|         |           |      |          |          |   |   |   |         |                |               |                 |             |      |           |   |
|---------|-----------|------|----------|----------|---|---|---|---------|----------------|---------------|-----------------|-------------|------|-----------|---|
| Dt_chr1 | Cufflinks | exon | 42612265 | 42612381 | . | - | . | gene_id | "XLOC_128115"; | transcript_id | "Novel_001753"; | exon_number | "3"; | gene_type | " |
| Dt_chr1 | Cufflinks | exon | 42612479 | 42612542 | . | - | . | gene_id | "XLOC_128115"; | transcript_id | "Novel_001753"; | exon_number | "4"; | gene_type | " |
| Dt_chr1 | Cufflinks | exon | 42612829 | 42612937 | . | - | . | gene_id | "XLOC_128115"; | transcript_id | "Novel_001753"; | exon_number | "5"; | gene_type | " |
| Dt_chr1 | Cufflinks | exon | 42613433 | 42613479 | . | - | . | gene_id | "XLOC_128115"; | transcript_id | "Novel_001753"; | exon_number | "6"; | gene_type | " |
| Dt_chr1 | Cufflinks | exon | 42613739 | 42613857 | . | - | . | gene_id | "XLOC_128115"; | transcript_id | "Novel_001753"; | exon_number | "7"; | gene_type | " |
| Dt_chr1 | Cufflinks | exon | 42611360 | 42611658 | . | - | . | gene_id | "XLOC_128115"; | transcript_id | "Novel_001754"; | exon_number | "1"; | gene_type | " |
| Dt_chr1 | Cufflinks | exon | 42612064 | 42612381 | . | - | . | gene_id | "XLOC_128115"; | transcript_id | "Novel_001754"; | exon_number | "2"; | gene_type | " |
| Dt_chr1 | Cufflinks | exon | 42612479 | 42612542 | . | - | . | gene_id | "XLOC_128115"; | transcript_id | "Novel_001754"; | exon_number | "3"; | gene_type | " |
| Dt_chr1 | Cufflinks | exon | 42612829 | 42612937 | . | - | . | gene_id | "XLOC_128115"; | transcript_id | "Novel_001754"; | exon_number | "4"; | gene_type | " |
| Dt_chr1 | Cufflinks | exon | 42613433 | 42613479 | . | - | . | gene_id | "XLOC_128115"; | transcript_id | "Novel_001754"; | exon_number | "5"; | gene_type | " |
| Dt_chr1 | Cufflinks | exon | 42613739 | 42613864 | . | - | . | gene_id | "XLOC_128115"; | transcript_id | "Novel_001754"; | exon_number | "6"; | gene_type | " |
| Dt_chr1 | Cufflinks | exon | 42788755 | 42789752 | . | - | . | gene_id | "XLOC_128154"; | transcript_id | "Novel_001755"; | exon_number | "1"; | gene_type | " |
| Dt_chr1 | Cufflinks | exon | 42789847 | 42789915 | . | - | . | gene_id | "XLOC_128154"; | transcript_id | "Novel_001755"; | exon_number | "2"; | gene_type | " |
| Dt_chr1 | Cufflinks | exon | 42790870 | 42790978 | . | - | . | gene_id | "XLOC_128154"; | transcript_id | "Novel_001755"; | exon_number | "3"; | gene_type | " |
| Dt_chr1 | Cufflinks | exon | 42928206 | 42928610 | . | - | . | gene_id | "XLOC_128189"; | transcript_id | "Novel_001756"; | exon_number | "1"; | gene_type | " |
| Dt_chr1 | Cufflinks | exon | 42928811 | 42928919 | . | - | . | gene_id | "XLOC_128189"; | transcript_id | "Novel_001756"; | exon_number | "2"; | gene_type | " |
| Dt_chr1 | Cufflinks | exon | 42929003 | 42929119 | . | - | . | gene_id | "XLOC_128189"; | transcript_id | "Novel_001756"; | exon_number | "3"; | gene_type | " |
| Dt_chr1 | Cufflinks | exon | 42929207 | 42930052 | . | - | . | gene_id | "XLOC_128189"; | transcript_id | "Novel_001756"; | exon_number | "4"; | gene_type | " |
| Dt_chr1 | Cufflinks | exon | 42930127 | 42930246 | . | - | . | gene_id | "XLOC_128189"; | transcript_id | "Novel_001756"; | exon_number | "5"; | gene_type | " |
| Dt_chr1 | Cufflinks | exon | 42930361 | 42930770 | . | - | . | gene_id | "XLOC_128189"; | transcript_id | "Novel_001756"; | exon_number | "6"; | gene_type | " |
| Dt_chr1 | Cufflinks | exon | 42931034 | 42931266 | . | - | . | gene_id | "XLOC_128189"; | transcript_id | "Novel_001756"; | exon_number | "7"; | gene_type | " |
| Dt_chr1 | Cufflinks | exon | 42928669 | 42928919 | . | - | . | gene_id | "XLOC_128189"; | transcript_id | "Novel_001757"; | exon_number | "1"; | gene_type | " |
| Dt_chr1 | Cufflinks | exon | 42929003 | 42929119 | . | - | . | gene_id | "XLOC_128189"; | transcript_id | "Novel_001757"; | exon_number | "2"; | gene_type | " |
| Dt_chr1 | Cufflinks | exon | 42929207 | 42930052 | . | - | . | gene_id | "XLOC_128189"; | transcript_id | "Novel_001757"; | exon_number | "3"; | gene_type | " |
| Dt_chr1 | Cufflinks | exon | 42930127 | 42930246 | . | - | . | gene_id | "XLOC_128189"; | transcript_id | "Novel_001757"; | exon_number | "4"; | gene_type | " |
| Dt_chr1 | Cufflinks | exon | 42930361 | 42931233 | . | - | . | gene_id | "XLOC_128189"; | transcript_id | "Novel_001757"; | exon_number | "5"; | gene_type | " |
| Dt_chr1 | Cufflinks | exon | 43220620 | 43220882 | . | - | . | gene_id | "XLOC_128238"; | transcript_id | "Novel_001758"; | exon_number | "1"; | gene_type | " |
| Dt_chr1 | Cufflinks | exon | 43220985 | 43221105 | . | - | . | gene_id | "XLOC_128238"; | transcript_id | "Novel_001758"; | exon_number | "2"; | gene_type | " |
| Dt_chr1 | Cufflinks | exon | 43221605 | 43221932 | . | - | . | gene_id | "XLOC_128238"; | transcript_id | "Novel_001758"; | exon_number | "3"; | gene_type | " |
| Dt_chr1 | Cufflinks | exon | 43223527 | 43224197 | . | - | . | gene_id | "XLOC_128238"; | transcript_id | "Novel_001759"; | exon_number | "1"; | gene_type | " |
| Dt_chr1 | Cufflinks | exon | 43224273 | 43224334 | . | - | . | gene_id | "XLOC_128238"; | transcript_id | "Novel_001759"; | exon_number | "2"; | gene_type | " |
| Dt_chr1 | Cufflinks | exon | 43224786 | 43224857 | . | - | . | gene_id | "XLOC_128238"; | transcript_id | "Novel_001759"; | exon_number | "3"; | gene_type | " |
| Dt_chr1 | Cufflinks | exon | 43225653 | 43225808 | . | - | . | gene_id | "XLOC_128238"; | transcript_id | "Novel_001759"; | exon_number | "4"; | gene_type | " |
| Dt_chr1 | Cufflinks | exon | 43380604 | 43380753 | . | - | . | gene_id | "XLOC_128253"; | transcript_id | "Novel_001760"; | exon_number | "1"; | gene_type | " |
| Dt_chr1 | Cufflinks | exon | 43380834 | 43381366 | . | - | . | gene_id | "XLOC_128253"; | transcript_id | "Novel_001760"; | exon_number | "2"; | gene_type | " |

|         |           |      |          |          |   |   |         |                |               |                 |             |      |           |   |
|---------|-----------|------|----------|----------|---|---|---------|----------------|---------------|-----------------|-------------|------|-----------|---|
| Dt_chr1 | Cufflinks | exon | 43381468 | 43381641 | . | . | gene_id | "XLOC_128253"; | transcript_id | "Novel_001760"; | exon_number | "3"; | gene_type | " |
| Dt_chr1 | Cufflinks | exon | 43506044 | 43507078 | . | . | gene_id | "XLOC_128265"; | transcript_id | "Novel_001761"; | exon_number | "1"; | gene_type | " |
| Dt_chr1 | Cufflinks | exon | 43507186 | 43507771 | . | . | gene_id | "XLOC_128265"; | transcript_id | "Novel_001761"; | exon_number | "2"; | gene_type | " |
| Dt_chr1 | Cufflinks | exon | 43507864 | 43507926 | . | . | gene_id | "XLOC_128265"; | transcript_id | "Novel_001761"; | exon_number | "3"; | gene_type | " |
| Dt_chr1 | Cufflinks | exon | 43508008 | 43508210 | . | . | gene_id | "XLOC_128265"; | transcript_id | "Novel_001761"; | exon_number | "4"; | gene_type | " |
| Dt_chr1 | Cufflinks | exon | 43507953 | 43508121 | . | . | gene_id | "XLOC_128265"; | transcript_id | "Novel_001762"; | exon_number | "1"; | gene_type | " |
| Dt_chr1 | Cufflinks | exon | 43508852 | 43509013 | . | . | gene_id | "XLOC_128265"; | transcript_id | "Novel_001762"; | exon_number | "2"; | gene_type | " |
| Dt_chr1 | Cufflinks | exon | 43509109 | 43509171 | . | . | gene_id | "XLOC_128265"; | transcript_id | "Novel_001762"; | exon_number | "3"; | gene_type | " |
| Dt_chr1 | Cufflinks | exon | 43509614 | 43509720 | . | . | gene_id | "XLOC_128265"; | transcript_id | "Novel_001762"; | exon_number | "4"; | gene_type | " |
| Dt_chr1 | Cufflinks | exon | 43510071 | 43510567 | . | . | gene_id | "XLOC_128265"; | transcript_id | "Novel_001762"; | exon_number | "5"; | gene_type | " |
| Dt_chr1 | Cufflinks | exon | 43508150 | 43509013 | . | . | gene_id | "XLOC_128265"; | transcript_id | "Novel_001763"; | exon_number | "1"; | gene_type | " |
| Dt_chr1 | Cufflinks | exon | 43509109 | 43509171 | . | . | gene_id | "XLOC_128265"; | transcript_id | "Novel_001763"; | exon_number | "2"; | gene_type | " |
| Dt_chr1 | Cufflinks | exon | 43509614 | 43509720 | . | . | gene_id | "XLOC_128265"; | transcript_id | "Novel_001763"; | exon_number | "3"; | gene_type | " |
| Dt_chr1 | Cufflinks | exon | 43510071 | 43510148 | . | . | gene_id | "XLOC_128265"; | transcript_id | "Novel_001763"; | exon_number | "4"; | gene_type | " |
| Dt_chr1 | Cufflinks | exon | 43510230 | 43510621 | . | . | gene_id | "XLOC_128265"; | transcript_id | "Novel_001763"; | exon_number | "5"; | gene_type | " |
| Dt_chr1 | Cufflinks | exon | 43512192 | 43512834 | . | . | gene_id | "XLOC_128270"; | transcript_id | "Novel_001764"; | exon_number | "1"; | gene_type | " |
| Dt_chr1 | Cufflinks | exon | 43513021 | 43513064 | . | . | gene_id | "XLOC_128270"; | transcript_id | "Novel_001764"; | exon_number | "2"; | gene_type | " |
| Dt_chr1 | Cufflinks | exon | 43544904 | 43545246 | . | . | gene_id | "XLOC_128282"; | transcript_id | "Novel_001765"; | exon_number | "1"; | gene_type | " |
| Dt_chr1 | Cufflinks | exon | 43545343 | 43545415 | . | . | gene_id | "XLOC_128282"; | transcript_id | "Novel_001765"; | exon_number | "2"; | gene_type | " |
| Dt_chr1 | Cufflinks | exon | 43545838 | 43545953 | . | . | gene_id | "XLOC_128282"; | transcript_id | "Novel_001765"; | exon_number | "3"; | gene_type | " |
| Dt_chr1 | Cufflinks | exon | 43641344 | 43641860 | . | . | gene_id | "XLOC_128295"; | transcript_id | "Novel_001766"; | exon_number | "1"; | gene_type | " |
| Dt_chr1 | Cufflinks | exon | 43642351 | 43642578 | . | . | gene_id | "XLOC_128295"; | transcript_id | "Novel_001766"; | exon_number | "2"; | gene_type | " |
| Dt_chr1 | Cufflinks | exon | 43650047 | 43651284 | . | . | gene_id | "XLOC_128296"; | transcript_id | "Novel_001767"; | exon_number | "1"; | gene_type | " |
| Dt_chr1 | Cufflinks | exon | 43651496 | 43652238 | . | . | gene_id | "XLOC_128296"; | transcript_id | "Novel_001767"; | exon_number | "2"; | gene_type | " |
| Dt_chr1 | Cufflinks | exon | 43665339 | 43667114 | . | . | gene_id | "XLOC_128300"; | transcript_id | "Novel_001768"; | exon_number | "1"; | gene_type | " |
| Dt_chr1 | Cufflinks | exon | 43670194 | 43670584 | . | . | gene_id | "XLOC_128300"; | transcript_id | "Novel_001768"; | exon_number | "2"; | gene_type | " |
| Dt_chr1 | Cufflinks | exon | 43671513 | 43671743 | . | . | gene_id | "XLOC_128300"; | transcript_id | "Novel_001768"; | exon_number | "3"; | gene_type | " |
| Dt_chr1 | Cufflinks | exon | 43671849 | 43671941 | . | . | gene_id | "XLOC_128300"; | transcript_id | "Novel_001768"; | exon_number | "4"; | gene_type | " |
| Dt_chr1 | Cufflinks | exon | 43672056 | 43672272 | . | . | gene_id | "XLOC_128300"; | transcript_id | "Novel_001768"; | exon_number | "5"; | gene_type | " |
| Dt_chr1 | Cufflinks | exon | 43665352 | 43665730 | . | . | gene_id | "XLOC_128300"; | transcript_id | "Novel_001769"; | exon_number | "1"; | gene_type | " |
| Dt_chr1 | Cufflinks | exon | 43665806 | 43665883 | . | . | gene_id | "XLOC_128300"; | transcript_id | "Novel_001769"; | exon_number | "2"; | gene_type | " |
| Dt_chr1 | Cufflinks | exon | 43666745 | 43667114 | . | . | gene_id | "XLOC_128300"; | transcript_id | "Novel_001769"; | exon_number | "3"; | gene_type | " |
| Dt_chr1 | Cufflinks | exon | 43667275 | 43668251 | . | . | gene_id | "XLOC_128300"; | transcript_id | "Novel_001769"; | exon_number | "4"; | gene_type | " |
| Dt_chr1 | Cufflinks | exon | 43665352 | 43665883 | . | . | gene_id | "XLOC_128300"; | transcript_id | "Novel_001770"; | exon_number | "1"; | gene_type | " |
| Dt_chr1 | Cufflinks | exon | 43666745 | 43667114 | . | . | gene_id | "XLOC_128300"; | transcript_id | "Novel_001770"; | exon_number | "2"; | gene_type | " |





|         |           |      |          |          |   |   |         |                |               |                 |             |       |           |   |
|---------|-----------|------|----------|----------|---|---|---------|----------------|---------------|-----------------|-------------|-------|-----------|---|
| Dt_chr1 | Cufflinks | exon | 43871082 | 43871159 | . | . | gene_id | "XLOC_128338"; | transcript_id | "Novel_001777"; | exon_number | "2";  | gene_type | " |
| Dt_chr1 | Cufflinks | exon | 43871273 | 43871494 | . | . | gene_id | "XLOC_128338"; | transcript_id | "Novel_001777"; | exon_number | "3";  | gene_type | " |
| Dt_chr1 | Cufflinks | exon | 43871501 | 43871983 | . | . | gene_id | "XLOC_128338"; | transcript_id | "Novel_001778"; | exon_number | "1";  | gene_type | " |
| Dt_chr1 | Cufflinks | exon | 43872270 | 43872367 | . | . | gene_id | "XLOC_128338"; | transcript_id | "Novel_001778"; | exon_number | "2";  | gene_type | " |
| Dt_chr1 | Cufflinks | exon | 43872447 | 43872568 | . | . | gene_id | "XLOC_128338"; | transcript_id | "Novel_001778"; | exon_number | "3";  | gene_type | " |
| Dt_chr1 | Cufflinks | exon | 43872646 | 43872922 | . | . | gene_id | "XLOC_128338"; | transcript_id | "Novel_001778"; | exon_number | "4";  | gene_type | " |
| Dt_chr1 | Cufflinks | exon | 43873100 | 43873282 | . | . | gene_id | "XLOC_128338"; | transcript_id | "Novel_001778"; | exon_number | "5";  | gene_type | " |
| Dt_chr1 | Cufflinks | exon | 43873619 | 43873732 | . | . | gene_id | "XLOC_128338"; | transcript_id | "Novel_001778"; | exon_number | "6";  | gene_type | " |
| Dt_chr1 | Cufflinks | exon | 43873838 | 43873949 | . | . | gene_id | "XLOC_128338"; | transcript_id | "Novel_001778"; | exon_number | "7";  | gene_type | " |
| Dt_chr1 | Cufflinks | exon | 43874034 | 43874143 | . | . | gene_id | "XLOC_128338"; | transcript_id | "Novel_001778"; | exon_number | "8";  | gene_type | " |
| Dt_chr1 | Cufflinks | exon | 43874232 | 43874385 | . | . | gene_id | "XLOC_128338"; | transcript_id | "Novel_001778"; | exon_number | "9";  | gene_type | " |
| Dt_chr1 | Cufflinks | exon | 43874536 | 43874765 | . | . | gene_id | "XLOC_128338"; | transcript_id | "Novel_001778"; | exon_number | "10"; | gene_type | " |
| Dt_chr1 | Cufflinks | exon | 43874492 | 43874959 | . | . | gene_id | "XLOC_128338"; | transcript_id | "Novel_001779"; | exon_number | "1";  | gene_type | " |
| Dt_chr1 | Cufflinks | exon | 43875056 | 43875158 | . | . | gene_id | "XLOC_128338"; | transcript_id | "Novel_001779"; | exon_number | "2";  | gene_type | " |
| Dt_chr1 | Cufflinks | exon | 43875245 | 43875390 | . | . | gene_id | "XLOC_128338"; | transcript_id | "Novel_001779"; | exon_number | "3";  | gene_type | " |
| Dt_chr1 | Cufflinks | exon | 43876560 | 43876813 | . | . | gene_id | "XLOC_128338"; | transcript_id | "Novel_001779"; | exon_number | "4";  | gene_type | " |
| Dt_chr1 | Cufflinks | exon | 43886367 | 43887017 | . | . | gene_id | "XLOC_128341"; | transcript_id | "Novel_001780"; | exon_number | "1";  | gene_type | " |
| Dt_chr1 | Cufflinks | exon | 43887099 | 43887240 | . | . | gene_id | "XLOC_128341"; | transcript_id | "Novel_001780"; | exon_number | "2";  | gene_type | " |
| Dt_chr1 | Cufflinks | exon | 43887627 | 43888063 | . | . | gene_id | "XLOC_128341"; | transcript_id | "Novel_001780"; | exon_number | "3";  | gene_type | " |
| Dt_chr1 | Cufflinks | exon | 43963717 | 43963857 | . | . | gene_id | "XLOC_128344"; | transcript_id | "Novel_001781"; | exon_number | "1";  | gene_type | " |
| Dt_chr1 | Cufflinks | exon | 43966250 | 43966867 | . | . | gene_id | "XLOC_128344"; | transcript_id | "Novel_001781"; | exon_number | "2";  | gene_type | " |
| Dt_chr1 | Cufflinks | exon | 43986520 | 43987262 | . | . | gene_id | "XLOC_128345"; | transcript_id | "Novel_001782"; | exon_number | "1";  | gene_type | " |
| Dt_chr1 | Cufflinks | exon | 43987348 | 43987547 | . | . | gene_id | "XLOC_128345"; | transcript_id | "Novel_001782"; | exon_number | "2";  | gene_type | " |
| Dt_chr1 | Cufflinks | exon | 43987643 | 43987844 | . | . | gene_id | "XLOC_128345"; | transcript_id | "Novel_001782"; | exon_number | "3";  | gene_type | " |
| Dt_chr1 | Cufflinks | exon | 43988434 | 43989914 | . | . | gene_id | "XLOC_128345"; | transcript_id | "Novel_001782"; | exon_number | "4";  | gene_type | " |
| Dt_chr1 | Cufflinks | exon | 44984381 | 44984644 | . | . | gene_id | "XLOC_128456"; | transcript_id | "Novel_001783"; | exon_number | "1";  | gene_type | " |
| Dt_chr1 | Cufflinks | exon | 44986328 | 44986459 | . | . | gene_id | "XLOC_128456"; | transcript_id | "Novel_001783"; | exon_number | "2";  | gene_type | " |
| Dt_chr1 | Cufflinks | exon | 45266285 | 45266898 | . | . | gene_id | "XLOC_128492"; | transcript_id | "Novel_001784"; | exon_number | "1";  | gene_type | " |
| Dt_chr1 | Cufflinks | exon | 45267697 | 45268690 | . | . | gene_id | "XLOC_128492"; | transcript_id | "Novel_001784"; | exon_number | "2";  | gene_type | " |
| Dt_chr1 | Cufflinks | exon | 46207336 | 46207968 | . | . | gene_id | "XLOC_128633"; | transcript_id | "Novel_001785"; | exon_number | "1";  | gene_type | " |
| Dt_chr1 | Cufflinks | exon | 46208224 | 46208330 | . | . | gene_id | "XLOC_128633"; | transcript_id | "Novel_001785"; | exon_number | "2";  | gene_type | " |
| Dt_chr1 | Cufflinks | exon | 46208563 | 46208620 | . | . | gene_id | "XLOC_128633"; | transcript_id | "Novel_001785"; | exon_number | "3";  | gene_type | " |
| Dt_chr1 | Cufflinks | exon | 46209529 | 46209630 | . | . | gene_id | "XLOC_128633"; | transcript_id | "Novel_001785"; | exon_number | "4";  | gene_type | " |
| Dt_chr1 | Cufflinks | exon | 46952121 | 46952406 | . | . | gene_id | "XLOC_128711"; | transcript_id | "Novel_001786"; | exon_number | "1";  | gene_type | " |
| Dt_chr1 | Cufflinks | exon | 46953167 | 46953301 | . | . | gene_id | "XLOC_128711"; | transcript_id | "Novel_001786"; | exon_number | "2";  | gene_type | " |







|         |           |      |          |          |   |   |         |                |               |                 |             |       |           |  |
|---------|-----------|------|----------|----------|---|---|---------|----------------|---------------|-----------------|-------------|-------|-----------|--|
| Dt_chr1 | Cufflinks | exon | 52335495 | 52335592 | . | . | gene_id | "XLOC_129286"; | transcript_id | "Novel_001803"; | exon_number | "12"; | gene_type |  |
| Dt_chr1 | Cufflinks | exon | 52335893 | 52336147 | . | . | gene_id | "XLOC_129286"; | transcript_id | "Novel_001803"; | exon_number | "13"; | gene_type |  |
| Dt_chr1 | Cufflinks | exon | 52332184 | 52332521 | . | . | gene_id | "XLOC_129286"; | transcript_id | "Novel_001804"; | exon_number | "1";  | gene_type |  |
| Dt_chr1 | Cufflinks | exon | 52332601 | 52332680 | . | . | gene_id | "XLOC_129286"; | transcript_id | "Novel_001804"; | exon_number | "2";  | gene_type |  |
| Dt_chr1 | Cufflinks | exon | 52332836 | 52332912 | . | . | gene_id | "XLOC_129286"; | transcript_id | "Novel_001804"; | exon_number | "3";  | gene_type |  |
| Dt_chr1 | Cufflinks | exon | 52333087 | 52333151 | . | . | gene_id | "XLOC_129286"; | transcript_id | "Novel_001804"; | exon_number | "4";  | gene_type |  |
| Dt_chr1 | Cufflinks | exon | 52333257 | 52333846 | . | . | gene_id | "XLOC_129286"; | transcript_id | "Novel_001804"; | exon_number | "5";  | gene_type |  |
| Dt_chr1 | Cufflinks | exon | 52334370 | 52334454 | . | . | gene_id | "XLOC_129286"; | transcript_id | "Novel_001804"; | exon_number | "6";  | gene_type |  |
| Dt_chr1 | Cufflinks | exon | 52334563 | 52334660 | . | . | gene_id | "XLOC_129286"; | transcript_id | "Novel_001804"; | exon_number | "7";  | gene_type |  |
| Dt_chr1 | Cufflinks | exon | 52334760 | 52334823 | . | . | gene_id | "XLOC_129286"; | transcript_id | "Novel_001804"; | exon_number | "8";  | gene_type |  |
| Dt_chr1 | Cufflinks | exon | 52334993 | 52335119 | . | . | gene_id | "XLOC_129286"; | transcript_id | "Novel_001804"; | exon_number | "9";  | gene_type |  |
| Dt_chr1 | Cufflinks | exon | 52335255 | 52335348 | . | . | gene_id | "XLOC_129286"; | transcript_id | "Novel_001804"; | exon_number | "10"; | gene_type |  |
| Dt_chr1 | Cufflinks | exon | 52335495 | 52335592 | . | . | gene_id | "XLOC_129286"; | transcript_id | "Novel_001804"; | exon_number | "11"; | gene_type |  |
| Dt_chr1 | Cufflinks | exon | 52335893 | 52336143 | . | . | gene_id | "XLOC_129286"; | transcript_id | "Novel_001804"; | exon_number | "12"; | gene_type |  |
| Dt_chr1 | Cufflinks | exon | 52626442 | 52627220 | . | . | gene_id | "XLOC_129319"; | transcript_id | "Novel_001805"; | exon_number | "1";  | gene_type |  |
| Dt_chr1 | Cufflinks | exon | 52633228 | 52633339 | . | . | gene_id | "XLOC_129319"; | transcript_id | "Novel_001805"; | exon_number | "2";  | gene_type |  |
| Dt_chr1 | Cufflinks | exon | 52633488 | 52633572 | . | . | gene_id | "XLOC_129319"; | transcript_id | "Novel_001805"; | exon_number | "3";  | gene_type |  |
| Dt_chr1 | Cufflinks | exon | 52634772 | 52634941 | . | . | gene_id | "XLOC_129319"; | transcript_id | "Novel_001805"; | exon_number | "4";  | gene_type |  |
| Dt_chr1 | Cufflinks | exon | 52632077 | 52633572 | . | . | gene_id | "XLOC_129319"; | transcript_id | "Novel_001806"; | exon_number | "1";  | gene_type |  |
| Dt_chr1 | Cufflinks | exon | 52634772 | 52634941 | . | . | gene_id | "XLOC_129319"; | transcript_id | "Novel_001806"; | exon_number | "2";  | gene_type |  |
| Dt_chr1 | Cufflinks | exon | 54260432 | 54261329 | . | . | gene_id | "XLOC_129464"; | transcript_id | "Novel_001807"; | exon_number | "1";  | gene_type |  |
| Dt_chr1 | Cufflinks | exon | 54263127 | 54263241 | . | . | gene_id | "XLOC_129464"; | transcript_id | "Novel_001807"; | exon_number | "2";  | gene_type |  |
| Dt_chr1 | Cufflinks | exon | 54803193 | 54803414 | . | . | gene_id | "XLOC_129495"; | transcript_id | "Novel_001808"; | exon_number | "1";  | gene_type |  |
| Dt_chr1 | Cufflinks | exon | 54803525 | 54804582 | . | . | gene_id | "XLOC_129495"; | transcript_id | "Novel_001808"; | exon_number | "2";  | gene_type |  |
| Dt_chr1 | Cufflinks | exon | 55419110 | 55419644 | . | . | gene_id | "XLOC_129556"; | transcript_id | "Novel_001809"; | exon_number | "1";  | gene_type |  |
| Dt_chr1 | Cufflinks | exon | 55419746 | 55419964 | . | . | gene_id | "XLOC_129556"; | transcript_id | "Novel_001809"; | exon_number | "2";  | gene_type |  |
| Dt_chr1 | Cufflinks | exon | 55420142 | 55420221 | . | . | gene_id | "XLOC_129556"; | transcript_id | "Novel_001809"; | exon_number | "3";  | gene_type |  |
| Dt_chr1 | Cufflinks | exon | 55420373 | 55420436 | . | . | gene_id | "XLOC_129556"; | transcript_id | "Novel_001809"; | exon_number | "4";  | gene_type |  |
| Dt_chr1 | Cufflinks | exon | 55634272 | 55634917 | . | . | gene_id | "XLOC_129573"; | transcript_id | "Novel_001810"; | exon_number | "1";  | gene_type |  |
| Dt_chr1 | Cufflinks | exon | 55635489 | 55635546 | . | . | gene_id | "XLOC_129573"; | transcript_id | "Novel_001810"; | exon_number | "2";  | gene_type |  |
| Dt_chr1 | Cufflinks | exon | 55636891 | 55636936 | . | . | gene_id | "XLOC_129573"; | transcript_id | "Novel_001810"; | exon_number | "3";  | gene_type |  |
| Dt_chr1 | Cufflinks | exon | 58460452 | 58460889 | . | . | gene_id | "XLOC_129882"; | transcript_id | "Novel_001811"; | exon_number | "1";  | gene_type |  |
| Dt_chr1 | Cufflinks | exon | 58460971 | 58461214 | . | . | gene_id | "XLOC_129882"; | transcript_id | "Novel_001811"; | exon_number | "2";  | gene_type |  |
| Dt_chr1 | Cufflinks | exon | 58461535 | 58461588 | . | . | gene_id | "XLOC_129882"; | transcript_id | "Novel_001811"; | exon_number | "3";  | gene_type |  |
| Dt_chr1 | Cufflinks | exon | 58461675 | 58461921 | . | . | gene_id | "XLOC_129882"; | transcript_id | "Novel_001811"; | exon_number | "4";  | gene_type |  |

|         |           |      |          |          |   |   |         |                |               |                 |             |      |           |   |
|---------|-----------|------|----------|----------|---|---|---------|----------------|---------------|-----------------|-------------|------|-----------|---|
| Dt_chr1 | Cufflinks | exon | 58465173 | 58465378 | . | . | gene_id | "XLOC_129882"; | transcript_id | "Novel_001811"; | exon_number | "5"; | gene_type | " |
| Dt_chr1 | Cufflinks | exon | 58460453 | 58460889 | . | . | gene_id | "XLOC_129882"; | transcript_id | "Novel_001812"; | exon_number | "1"; | gene_type | " |
| Dt_chr1 | Cufflinks | exon | 58460971 | 58461214 | . | . | gene_id | "XLOC_129882"; | transcript_id | "Novel_001812"; | exon_number | "2"; | gene_type | " |
| Dt_chr1 | Cufflinks | exon | 58461535 | 58461921 | . | . | gene_id | "XLOC_129882"; | transcript_id | "Novel_001812"; | exon_number | "3"; | gene_type | " |
| Dt_chr1 | Cufflinks | exon | 58465173 | 58465336 | . | . | gene_id | "XLOC_129882"; | transcript_id | "Novel_001812"; | exon_number | "4"; | gene_type | " |
| Dt_chr1 | Cufflinks | exon | 58460453 | 58460889 | . | . | gene_id | "XLOC_129882"; | transcript_id | "Novel_001813"; | exon_number | "1"; | gene_type | " |
| Dt_chr1 | Cufflinks | exon | 58460971 | 58461147 | . | . | gene_id | "XLOC_129882"; | transcript_id | "Novel_001813"; | exon_number | "2"; | gene_type | " |
| Dt_chr1 | Cufflinks | exon | 58461535 | 58461588 | . | . | gene_id | "XLOC_129882"; | transcript_id | "Novel_001813"; | exon_number | "3"; | gene_type | " |
| Dt_chr1 | Cufflinks | exon | 58461675 | 58461921 | . | . | gene_id | "XLOC_129882"; | transcript_id | "Novel_001813"; | exon_number | "4"; | gene_type | " |
| Dt_chr1 | Cufflinks | exon | 58465173 | 58465510 | . | . | gene_id | "XLOC_129882"; | transcript_id | "Novel_001813"; | exon_number | "5"; | gene_type | " |
| Dt_chr1 | Cufflinks | exon | 58460456 | 58460889 | . | . | gene_id | "XLOC_129882"; | transcript_id | "Novel_001814"; | exon_number | "1"; | gene_type | " |
| Dt_chr1 | Cufflinks | exon | 58460971 | 58461147 | . | . | gene_id | "XLOC_129882"; | transcript_id | "Novel_001814"; | exon_number | "2"; | gene_type | " |
| Dt_chr1 | Cufflinks | exon | 58461535 | 58461921 | . | . | gene_id | "XLOC_129882"; | transcript_id | "Novel_001814"; | exon_number | "3"; | gene_type | " |
| Dt_chr1 | Cufflinks | exon | 58465173 | 58465323 | . | . | gene_id | "XLOC_129882"; | transcript_id | "Novel_001814"; | exon_number | "4"; | gene_type | " |
| Dt_chr1 | Cufflinks | exon | 61523628 | 61524375 | . | . | gene_id | "XLOC_130074"; | transcript_id | "Novel_001815"; | exon_number | "1"; | gene_type | " |
| Dt_chr1 | Cufflinks | exon | 61534090 | 61534167 | . | . | gene_id | "XLOC_130074"; | transcript_id | "Novel_001815"; | exon_number | "2"; | gene_type | " |
| Dt_chr1 | Cufflinks | exon | 61534350 | 61534406 | . | . | gene_id | "XLOC_130074"; | transcript_id | "Novel_001815"; | exon_number | "3"; | gene_type | " |
| Dt_chr1 | Cufflinks | exon | 61535295 | 61535545 | . | . | gene_id | "XLOC_130074"; | transcript_id | "Novel_001815"; | exon_number | "4"; | gene_type | " |
| Dt_chr1 | Cufflinks | exon | 62728395 | 62728796 | . | . | gene_id | "XLOC_130139"; | transcript_id | "Novel_001816"; | exon_number | "1"; | gene_type | " |
| Dt_chr1 | Cufflinks | exon | 62729341 | 62729457 | . | . | gene_id | "XLOC_130139"; | transcript_id | "Novel_001816"; | exon_number | "2"; | gene_type | " |
| Dt_chr1 | Cufflinks | exon | 62729943 | 62730074 | . | . | gene_id | "XLOC_130139"; | transcript_id | "Novel_001816"; | exon_number | "3"; | gene_type | " |
| Dt_chr1 | Cufflinks | exon | 62730987 | 62731323 | . | . | gene_id | "XLOC_130139"; | transcript_id | "Novel_001816"; | exon_number | "4"; | gene_type | " |
| Dt_chr1 | Cufflinks | exon | 62819453 | 62821108 | . | . | gene_id | "XLOC_130151"; | transcript_id | "Novel_001817"; | exon_number | "1"; | gene_type | " |
| Dt_chr1 | Cufflinks | exon | 62821626 | 62822230 | . | . | gene_id | "XLOC_130151"; | transcript_id | "Novel_001817"; | exon_number | "2"; | gene_type | " |
| Dt_chr1 | Cufflinks | exon | 64074790 | 64075310 | . | . | gene_id | "XLOC_130221"; | transcript_id | "Novel_001818"; | exon_number | "1"; | gene_type | " |
| Dt_chr1 | Cufflinks | exon | 64076780 | 64077234 | . | . | gene_id | "XLOC_130221"; | transcript_id | "Novel_001818"; | exon_number | "2"; | gene_type | " |
| Dt_chr1 | Cufflinks | exon | 64077379 | 64077547 | . | . | gene_id | "XLOC_130221"; | transcript_id | "Novel_001818"; | exon_number | "3"; | gene_type | " |
| Dt_chr1 | Cufflinks | exon | 64076604 | 64077234 | . | . | gene_id | "XLOC_130221"; | transcript_id | "Novel_001819"; | exon_number | "1"; | gene_type | " |
| Dt_chr1 | Cufflinks | exon | 64077379 | 64077554 | . | . | gene_id | "XLOC_130221"; | transcript_id | "Novel_001819"; | exon_number | "2"; | gene_type | " |
| Dt_chr1 | Cufflinks | exon | 65258545 | 65258654 | . | . | gene_id | "XLOC_130284"; | transcript_id | "Novel_001820"; | exon_number | "1"; | gene_type | " |
| Dt_chr1 | Cufflinks | exon | 65259348 | 65259588 | . | . | gene_id | "XLOC_130284"; | transcript_id | "Novel_001820"; | exon_number | "2"; | gene_type | " |
| Dt_chr1 | Cufflinks | exon | 73423763 | 73426240 | . | . | gene_id | "XLOC_130728"; | transcript_id | "Novel_001821"; | exon_number | "1"; | gene_type | " |
| Dt_chr1 | Cufflinks | exon | 73426334 | 73427504 | . | . | gene_id | "XLOC_130728"; | transcript_id | "Novel_001821"; | exon_number | "2"; | gene_type | " |
| Dt_chr1 | Cufflinks | exon | 74594589 | 74595414 | . | . | gene_id | "XLOC_130792"; | transcript_id | "Novel_001822"; | exon_number | "1"; | gene_type | " |
| Dt_chr1 | Cufflinks | exon | 74596821 | 74596869 | . | . | gene_id | "XLOC_130792"; | transcript_id | "Novel_001822"; | exon_number | "2"; | gene_type | " |



|          |           |      |          |          |   |   |   |         |                |               |                 |             |      |           |   |
|----------|-----------|------|----------|----------|---|---|---|---------|----------------|---------------|-----------------|-------------|------|-----------|---|
| Dt_chr1  | Cufflinks | exon | 75525781 | 75527030 | . | - | . | gene_id | "XLOC_130881"; | transcript_id | "Novel_001829"; | exon_number | "4"; | gene_type | " |
| Dt_chr1  | Cufflinks | exon | 77594948 | 77595965 | . | - | . | gene_id | "XLOC_131073"; | transcript_id | "Novel_001830"; | exon_number | "1"; | gene_type | " |
| Dt_chr1  | Cufflinks | exon | 77597037 | 77597084 | . | - | . | gene_id | "XLOC_131073"; | transcript_id | "Novel_001830"; | exon_number | "2"; | gene_type | " |
| Dt_chr1  | Cufflinks | exon | 77597182 | 77597224 | . | - | . | gene_id | "XLOC_131073"; | transcript_id | "Novel_001830"; | exon_number | "3"; | gene_type | " |
| Dt_chr1  | Cufflinks | exon | 77597327 | 77597390 | . | - | . | gene_id | "XLOC_131073"; | transcript_id | "Novel_001830"; | exon_number | "4"; | gene_type | " |
| Dt_chr1  | Cufflinks | exon | 77597524 | 77597576 | . | - | . | gene_id | "XLOC_131073"; | transcript_id | "Novel_001830"; | exon_number | "5"; | gene_type | " |
| Dt_chr1  | Cufflinks | exon | 77597650 | 77598023 | . | - | . | gene_id | "XLOC_131073"; | transcript_id | "Novel_001830"; | exon_number | "6"; | gene_type | " |
| Dt_chr1  | Cufflinks | exon | 77597337 | 77597390 | . | - | . | gene_id | "XLOC_131073"; | transcript_id | "Novel_001831"; | exon_number | "1"; | gene_type | " |
| Dt_chr1  | Cufflinks | exon | 77597524 | 77597576 | . | - | . | gene_id | "XLOC_131073"; | transcript_id | "Novel_001831"; | exon_number | "2"; | gene_type | " |
| Dt_chr1  | Cufflinks | exon | 77597650 | 77597771 | . | - | . | gene_id | "XLOC_131073"; | transcript_id | "Novel_001831"; | exon_number | "3"; | gene_type | " |
| Dt_chr1  | Cufflinks | exon | 77597855 | 77598035 | . | - | . | gene_id | "XLOC_131073"; | transcript_id | "Novel_001831"; | exon_number | "4"; | gene_type | " |
| Dt_chr1  | Cufflinks | exon | 79944876 | 79945481 | . | - | . | gene_id | "XLOC_131186"; | transcript_id | "Novel_001832"; | exon_number | "1"; | gene_type | " |
| Dt_chr1  | Cufflinks | exon | 79945745 | 79945903 | . | - | . | gene_id | "XLOC_131186"; | transcript_id | "Novel_001832"; | exon_number | "2"; | gene_type | " |
| Dt_chr1  | Cufflinks | exon | 79945975 | 79946134 | . | - | . | gene_id | "XLOC_131186"; | transcript_id | "Novel_001832"; | exon_number | "3"; | gene_type | " |
| Dt_chr1  | Cufflinks | exon | 79946221 | 79946785 | . | - | . | gene_id | "XLOC_131186"; | transcript_id | "Novel_001832"; | exon_number | "4"; | gene_type | " |
| Dt_chr1  | Cufflinks | exon | 79947520 | 79947710 | . | - | . | gene_id | "XLOC_131186"; | transcript_id | "Novel_001832"; | exon_number | "5"; | gene_type | " |
| Dt_chr1  | Cufflinks | exon | 81106990 | 81107528 | . | - | . | gene_id | "XLOC_131286"; | transcript_id | "Novel_001833"; | exon_number | "1"; | gene_type | " |
| Dt_chr1  | Cufflinks | exon | 81107664 | 81108241 | . | - | . | gene_id | "XLOC_131286"; | transcript_id | "Novel_001833"; | exon_number | "2"; | gene_type | " |
| Dt_chr1  | Cufflinks | exon | 85805843 | 85806167 | . | - | . | gene_id | "XLOC_131702"; | transcript_id | "Novel_001834"; | exon_number | "1"; | gene_type | " |
| Dt_chr1  | Cufflinks | exon | 85807265 | 85807434 | . | - | . | gene_id | "XLOC_131702"; | transcript_id | "Novel_001834"; | exon_number | "2"; | gene_type | " |
| Dt_chr1  | Cufflinks | exon | 85808163 | 85808500 | . | - | . | gene_id | "XLOC_131702"; | transcript_id | "Novel_001834"; | exon_number | "3"; | gene_type | " |
| Dt_chr1  | Cufflinks | exon | 91105675 | 91107356 | . | - | . | gene_id | "XLOC_131945"; | transcript_id | "Novel_001835"; | exon_number | "1"; | gene_type | " |
| Dt_chr1  | Cufflinks | exon | 91109887 | 91109934 | . | - | . | gene_id | "XLOC_131945"; | transcript_id | "Novel_001835"; | exon_number | "2"; | gene_type | " |
| Dt_chr1  | Cufflinks | exon | 91110071 | 91110443 | . | - | . | gene_id | "XLOC_131945"; | transcript_id | "Novel_001835"; | exon_number | "3"; | gene_type | " |
| Dt_chr1  | Cufflinks | exon | 94218919 | 94218998 | . | - | . | gene_id | "XLOC_132139"; | transcript_id | "Novel_001836"; | exon_number | "1"; | gene_type | " |
| Dt_chr1  | Cufflinks | exon | 94236270 | 94236515 | . | - | . | gene_id | "XLOC_132139"; | transcript_id | "Novel_001836"; | exon_number | "2"; | gene_type | " |
| Dt_chr10 | Cufflinks | exon | 736046   | 736091   | . | + | . | gene_id | "XLOC_132370"; | transcript_id | "Novel_001837"; | exon_number | "1"; | gene_type | " |
| Dt_chr10 | Cufflinks | exon | 736173   | 736278   | . | + | . | gene_id | "XLOC_132370"; | transcript_id | "Novel_001837"; | exon_number | "2"; | gene_type | " |
| Dt_chr10 | Cufflinks | exon | 736887   | 737600   | . | + | . | gene_id | "XLOC_132370"; | transcript_id | "Novel_001837"; | exon_number | "3"; | gene_type | " |
| Dt_chr10 | Cufflinks | exon | 1351547  | 1351930  | . | + | . | gene_id | "XLOC_132492"; | transcript_id | "Novel_001838"; | exon_number | "1"; | gene_type | " |
| Dt_chr10 | Cufflinks | exon | 1352201  | 1353474  | . | + | . | gene_id | "XLOC_132492"; | transcript_id | "Novel_001838"; | exon_number | "2"; | gene_type | " |
| Dt_chr10 | Cufflinks | exon | 1353610  | 1357356  | . | + | . | gene_id | "XLOC_132492"; | transcript_id | "Novel_001838"; | exon_number | "3"; | gene_type | " |
| Dt_chr10 | Cufflinks | exon | 1389905  | 1390004  | . | + | . | gene_id | "XLOC_132495"; | transcript_id | "Novel_001839"; | exon_number | "1"; | gene_type | " |
| Dt_chr10 | Cufflinks | exon | 1390114  | 1390318  | . | + | . | gene_id | "XLOC_132495"; | transcript_id | "Novel_001839"; | exon_number | "2"; | gene_type | " |
| Dt_chr10 | Cufflinks | exon | 6692369  | 6692534  | . | + | . | gene_id | "XLOC_132895"; | transcript_id | "Novel_001840"; | exon_number | "1"; | gene_type | " |



|          |           |      |         |         |   |   |   |         |                |               |                 |             |      |           |   |
|----------|-----------|------|---------|---------|---|---|---|---------|----------------|---------------|-----------------|-------------|------|-----------|---|
| Dt_chr10 | Cufflinks | exon | 6693550 | 6693597 | . | + | . | gene_id | "XLOC_132895"; | transcript_id | "Novel_001840"; | exon_number | "2"; | gene_type | " |
| Dt_chr10 | Cufflinks | exon | 6694857 | 6695797 | . | + | . | gene_id | "XLOC_132895"; | transcript_id | "Novel_001840"; | exon_number | "3"; | gene_type | " |
| Dt_chr10 | Cufflinks | exon | 6776687 | 6776976 | . | + | . | gene_id | "XLOC_132904"; | transcript_id | "Novel_001841"; | exon_number | "1"; | gene_type | " |
| Dt_chr10 | Cufflinks | exon | 6777074 | 6778186 | . | + | . | gene_id | "XLOC_132904"; | transcript_id | "Novel_001841"; | exon_number | "2"; | gene_type | " |
| Dt_chr10 | Cufflinks | exon | 6776687 | 6776976 | . | + | . | gene_id | "XLOC_132904"; | transcript_id | "Novel_001842"; | exon_number | "1"; | gene_type | " |
| Dt_chr10 | Cufflinks | exon | 6777082 | 6778186 | . | + | . | gene_id | "XLOC_132904"; | transcript_id | "Novel_001842"; | exon_number | "2"; | gene_type | " |
| Dt_chr10 | Cufflinks | exon | 7731227 | 7731505 | . | + | . | gene_id | "XLOC_132981"; | transcript_id | "Novel_001843"; | exon_number | "1"; | gene_type | " |
| Dt_chr10 | Cufflinks | exon | 7731582 | 7731991 | . | + | . | gene_id | "XLOC_132981"; | transcript_id | "Novel_001843"; | exon_number | "2"; | gene_type | " |
| Dt_chr10 | Cufflinks | exon | 7732080 | 7732214 | . | + | . | gene_id | "XLOC_132981"; | transcript_id | "Novel_001843"; | exon_number | "3"; | gene_type | " |
| Dt_chr10 | Cufflinks | exon | 7733028 | 7733210 | . | + | . | gene_id | "XLOC_132981"; | transcript_id | "Novel_001843"; | exon_number | "4"; | gene_type | " |
| Dt_chr10 | Cufflinks | exon | 7733982 | 7734143 | . | + | . | gene_id | "XLOC_132981"; | transcript_id | "Novel_001843"; | exon_number | "5"; | gene_type | " |
| Dt_chr10 | Cufflinks | exon | 7734436 | 7735049 | . | + | . | gene_id | "XLOC_132981"; | transcript_id | "Novel_001843"; | exon_number | "6"; | gene_type | " |
| Dt_chr10 | Cufflinks | exon | 8555018 | 8555143 | . | + | . | gene_id | "XLOC_133082"; | transcript_id | "Novel_001844"; | exon_number | "1"; | gene_type | " |
| Dt_chr10 | Cufflinks | exon | 8555289 | 8555538 | . | + | . | gene_id | "XLOC_133082"; | transcript_id | "Novel_001844"; | exon_number | "2"; | gene_type | " |
| Dt_chr10 | Cufflinks | exon | 8555766 | 8555894 | . | + | . | gene_id | "XLOC_133082"; | transcript_id | "Novel_001844"; | exon_number | "3"; | gene_type | " |
| Dt_chr10 | Cufflinks | exon | 8555984 | 8556045 | . | + | . | gene_id | "XLOC_133082"; | transcript_id | "Novel_001844"; | exon_number | "4"; | gene_type | " |
| Dt_chr10 | Cufflinks | exon | 8556296 | 8556470 | . | + | . | gene_id | "XLOC_133082"; | transcript_id | "Novel_001844"; | exon_number | "5"; | gene_type | " |
| Dt_chr10 | Cufflinks | exon | 8813259 | 8813356 | . | + | . | gene_id | "XLOC_133116"; | transcript_id | "Novel_001845"; | exon_number | "1"; | gene_type | " |
| Dt_chr10 | Cufflinks | exon | 8813656 | 8813709 | . | + | . | gene_id | "XLOC_133116"; | transcript_id | "Novel_001845"; | exon_number | "2"; | gene_type | " |
| Dt_chr10 | Cufflinks | exon | 8814382 | 8816892 | . | + | . | gene_id | "XLOC_133116"; | transcript_id | "Novel_001845"; | exon_number | "3"; | gene_type | " |
| Dt_chr10 | Cufflinks | exon | 8888461 | 8893752 | . | + | . | gene_id | "XLOC_133139"; | transcript_id | "Novel_001846"; | exon_number | "1"; | gene_type | " |
| Dt_chr10 | Cufflinks | exon | 8893926 | 8894482 | . | + | . | gene_id | "XLOC_133139"; | transcript_id | "Novel_001846"; | exon_number | "2"; | gene_type | " |
| Dt_chr10 | Cufflinks | exon | 8978725 | 8979193 | . | + | . | gene_id | "XLOC_133161"; | transcript_id | "Novel_001847"; | exon_number | "1"; | gene_type | " |
| Dt_chr10 | Cufflinks | exon | 8979814 | 8980163 | . | + | . | gene_id | "XLOC_133161"; | transcript_id | "Novel_001847"; | exon_number | "2"; | gene_type | " |
| Dt_chr10 | Cufflinks | exon | 9168814 | 9168973 | . | + | . | gene_id | "XLOC_133190"; | transcript_id | "Novel_001848"; | exon_number | "1"; | gene_type | " |
| Dt_chr10 | Cufflinks | exon | 9169086 | 9169165 | . | + | . | gene_id | "XLOC_133190"; | transcript_id | "Novel_001848"; | exon_number | "2"; | gene_type | " |
| Dt_chr10 | Cufflinks | exon | 9903866 | 9904273 | . | + | . | gene_id | "XLOC_133262"; | transcript_id | "Novel_001849"; | exon_number | "1"; | gene_type | " |
| Dt_chr10 | Cufflinks | exon | 9904366 | 9905077 | . | + | . | gene_id | "XLOC_133262"; | transcript_id | "Novel_001849"; | exon_number | "2"; | gene_type | " |
| Dt_chr10 | Cufflinks | exon | 9905794 | 9905834 | . | + | . | gene_id | "XLOC_133262"; | transcript_id | "Novel_001849"; | exon_number | "3"; | gene_type | " |
| Dt_chr10 | Cufflinks | exon | 9907251 | 9907527 | . | + | . | gene_id | "XLOC_133262"; | transcript_id | "Novel_001849"; | exon_number | "4"; | gene_type | " |
| Dt_chr10 | Cufflinks | exon | 9903920 | 9904273 | . | + | . | gene_id | "XLOC_133262"; | transcript_id | "Novel_001850"; | exon_number | "1"; | gene_type | " |
| Dt_chr10 | Cufflinks | exon | 9904366 | 9904647 | . | + | . | gene_id | "XLOC_133262"; | transcript_id | "Novel_001850"; | exon_number | "2"; | gene_type | " |
| Dt_chr10 | Cufflinks | exon | 9904749 | 9904840 | . | + | . | gene_id | "XLOC_133262"; | transcript_id | "Novel_001850"; | exon_number | "3"; | gene_type | " |
| Dt_chr10 | Cufflinks | exon | 9905034 | 9905077 | . | + | . | gene_id | "XLOC_133262"; | transcript_id | "Novel_001850"; | exon_number | "4"; | gene_type | " |
| Dt_chr10 | Cufflinks | exon | 9905794 | 9905834 | . | + | . | gene_id | "XLOC_133262"; | transcript_id | "Novel_001850"; | exon_number | "5"; | gene_type | " |



|          |           |      |          |          |   |   |   |         |                |               |                 |             |      |           |   |
|----------|-----------|------|----------|----------|---|---|---|---------|----------------|---------------|-----------------|-------------|------|-----------|---|
| Dt_chr10 | Cufflinks | exon | 12461756 | 12461835 | . | + | . | gene_id | "XLOC_133550"; | transcript_id | "Novel_001857"; | exon_number | "3"; | gene_type | " |
| Dt_chr10 | Cufflinks | exon | 12462926 | 12463080 | . | + | . | gene_id | "XLOC_133550"; | transcript_id | "Novel_001857"; | exon_number | "4"; | gene_type | " |
| Dt_chr10 | Cufflinks | exon | 12463162 | 12463736 | . | + | . | gene_id | "XLOC_133550"; | transcript_id | "Novel_001857"; | exon_number | "5"; | gene_type | " |
| Dt_chr10 | Cufflinks | exon | 12460239 | 12460874 | . | + | . | gene_id | "XLOC_133550"; | transcript_id | "Novel_001858"; | exon_number | "1"; | gene_type | " |
| Dt_chr10 | Cufflinks | exon | 12461418 | 12461525 | . | + | . | gene_id | "XLOC_133550"; | transcript_id | "Novel_001858"; | exon_number | "2"; | gene_type | " |
| Dt_chr10 | Cufflinks | exon | 12462097 | 12463080 | . | + | . | gene_id | "XLOC_133550"; | transcript_id | "Novel_001859"; | exon_number | "1"; | gene_type | " |
| Dt_chr10 | Cufflinks | exon | 12463162 | 12463228 | . | + | . | gene_id | "XLOC_133550"; | transcript_id | "Novel_001859"; | exon_number | "2"; | gene_type | " |
| Dt_chr10 | Cufflinks | exon | 14640927 | 14641152 | . | + | . | gene_id | "XLOC_133701"; | transcript_id | "Novel_001860"; | exon_number | "1"; | gene_type | " |
| Dt_chr10 | Cufflinks | exon | 15897325 | 15897738 | . | + | . | gene_id | "XLOC_133767"; | transcript_id | "Novel_001861"; | exon_number | "1"; | gene_type | " |
| Dt_chr10 | Cufflinks | exon | 15897846 | 15897943 | . | + | . | gene_id | "XLOC_133767"; | transcript_id | "Novel_001861"; | exon_number | "2"; | gene_type | " |
| Dt_chr10 | Cufflinks | exon | 15898031 | 15898084 | . | + | . | gene_id | "XLOC_133767"; | transcript_id | "Novel_001861"; | exon_number | "3"; | gene_type | " |
| Dt_chr10 | Cufflinks | exon | 15898707 | 15898795 | . | + | . | gene_id | "XLOC_133767"; | transcript_id | "Novel_001861"; | exon_number | "4"; | gene_type | " |
| Dt_chr10 | Cufflinks | exon | 15898896 | 15899372 | . | + | . | gene_id | "XLOC_133767"; | transcript_id | "Novel_001861"; | exon_number | "5"; | gene_type | " |
| Dt_chr10 | Cufflinks | exon | 15897341 | 15897738 | . | + | . | gene_id | "XLOC_133767"; | transcript_id | "Novel_001862"; | exon_number | "1"; | gene_type | " |
| Dt_chr10 | Cufflinks | exon | 15897846 | 15897943 | . | + | . | gene_id | "XLOC_133767"; | transcript_id | "Novel_001862"; | exon_number | "2"; | gene_type | " |
| Dt_chr10 | Cufflinks | exon | 15898031 | 15898084 | . | + | . | gene_id | "XLOC_133767"; | transcript_id | "Novel_001862"; | exon_number | "3"; | gene_type | " |
| Dt_chr10 | Cufflinks | exon | 15898707 | 15898795 | . | + | . | gene_id | "XLOC_133767"; | transcript_id | "Novel_001862"; | exon_number | "4"; | gene_type | " |
| Dt_chr10 | Cufflinks | exon | 15898896 | 15899026 | . | + | . | gene_id | "XLOC_133767"; | transcript_id | "Novel_001862"; | exon_number | "5"; | gene_type | " |
| Dt_chr10 | Cufflinks | exon | 15899685 | 15899711 | . | + | . | gene_id | "XLOC_133767"; | transcript_id | "Novel_001862"; | exon_number | "6"; | gene_type | " |
| Dt_chr10 | Cufflinks | exon | 15899845 | 15899937 | . | + | . | gene_id | "XLOC_133767"; | transcript_id | "Novel_001862"; | exon_number | "7"; | gene_type | " |
| Dt_chr10 | Cufflinks | exon | 15900124 | 15900370 | . | + | . | gene_id | "XLOC_133767"; | transcript_id | "Novel_001862"; | exon_number | "8"; | gene_type | " |
| Dt_chr10 | Cufflinks | exon | 15898022 | 15898084 | . | + | . | gene_id | "XLOC_133767"; | transcript_id | "Novel_001863"; | exon_number | "1"; | gene_type | " |
| Dt_chr10 | Cufflinks | exon | 15898707 | 15898795 | . | + | . | gene_id | "XLOC_133767"; | transcript_id | "Novel_001863"; | exon_number | "2"; | gene_type | " |
| Dt_chr10 | Cufflinks | exon | 15898896 | 15899141 | . | + | . | gene_id | "XLOC_133767"; | transcript_id | "Novel_001863"; | exon_number | "3"; | gene_type | " |
| Dt_chr10 | Cufflinks | exon | 18485285 | 18488416 | . | + | . | gene_id | "XLOC_133968"; | transcript_id | "Novel_001864"; | exon_number | "1"; | gene_type | " |
| Dt_chr10 | Cufflinks | exon | 18488533 | 18488560 | . | + | . | gene_id | "XLOC_133968"; | transcript_id | "Novel_001864"; | exon_number | "2"; | gene_type | " |
| Dt_chr10 | Cufflinks | exon | 19118826 | 19119626 | . | + | . | gene_id | "XLOC_134024"; | transcript_id | "Novel_001865"; | exon_number | "1"; | gene_type | " |
| Dt_chr10 | Cufflinks | exon | 19119743 | 19119920 | . | + | . | gene_id | "XLOC_134024"; | transcript_id | "Novel_001865"; | exon_number | "2"; | gene_type | " |
| Dt_chr10 | Cufflinks | exon | 19120054 | 19120628 | . | + | . | gene_id | "XLOC_134024"; | transcript_id | "Novel_001865"; | exon_number | "3"; | gene_type | " |
| Dt_chr10 | Cufflinks | exon | 19121033 | 19121356 | . | + | . | gene_id | "XLOC_134024"; | transcript_id | "Novel_001865"; | exon_number | "4"; | gene_type | " |
| Dt_chr10 | Cufflinks | exon | 19121918 | 19122049 | . | + | . | gene_id | "XLOC_134024"; | transcript_id | "Novel_001865"; | exon_number | "5"; | gene_type | " |
| Dt_chr10 | Cufflinks | exon | 19123055 | 19123600 | . | + | . | gene_id | "XLOC_134024"; | transcript_id | "Novel_001865"; | exon_number | "6"; | gene_type | " |
| Dt_chr10 | Cufflinks | exon | 19118854 | 19119048 | . | + | . | gene_id | "XLOC_134024"; | transcript_id | "Novel_001866"; | exon_number | "1"; | gene_type | " |
| Dt_chr10 | Cufflinks | exon | 19119387 | 19119626 | . | + | . | gene_id | "XLOC_134024"; | transcript_id | "Novel_001866"; | exon_number | "2"; | gene_type | " |
| Dt_chr10 | Cufflinks | exon | 19119743 | 19119920 | . | + | . | gene_id | "XLOC_134024"; | transcript_id | "Novel_001866"; | exon_number | "3"; | gene_type | " |

|          |           |      |          |          |   |   |   |         |                |               |                 |             |      |           |   |
|----------|-----------|------|----------|----------|---|---|---|---------|----------------|---------------|-----------------|-------------|------|-----------|---|
| Dt_chr10 | Cufflinks | exon | 19120054 | 19120628 | . | + | . | gene_id | "XLOC_134024"; | transcript_id | "Novel_001866"; | exon_number | "4"; | gene_type | " |
| Dt_chr10 | Cufflinks | exon | 19121033 | 19121354 | . | + | . | gene_id | "XLOC_134024"; | transcript_id | "Novel_001866"; | exon_number | "5"; | gene_type | " |
| Dt_chr10 | Cufflinks | exon | 19188184 | 19188651 | . | + | . | gene_id | "XLOC_134034"; | transcript_id | "Novel_001867"; | exon_number | "1"; | gene_type | " |
| Dt_chr10 | Cufflinks | exon | 19188750 | 19188815 | . | + | . | gene_id | "XLOC_134034"; | transcript_id | "Novel_001867"; | exon_number | "2"; | gene_type | " |
| Dt_chr10 | Cufflinks | exon | 19616923 | 19617182 | . | + | . | gene_id | "XLOC_134084"; | transcript_id | "Novel_001868"; | exon_number | "1"; | gene_type | " |
| Dt_chr10 | Cufflinks | exon | 19620004 | 19620086 | . | + | . | gene_id | "XLOC_134084"; | transcript_id | "Novel_001868"; | exon_number | "2"; | gene_type | " |
| Dt_chr10 | Cufflinks | exon | 19620785 | 19622405 | . | + | . | gene_id | "XLOC_134084"; | transcript_id | "Novel_001868"; | exon_number | "3"; | gene_type | " |
| Dt_chr10 | Cufflinks | exon | 19961094 | 19961434 | . | + | . | gene_id | "XLOC_134136"; | transcript_id | "Novel_001869"; | exon_number | "1"; | gene_type | " |
| Dt_chr10 | Cufflinks | exon | 19961882 | 19962019 | . | + | . | gene_id | "XLOC_134136"; | transcript_id | "Novel_001869"; | exon_number | "2"; | gene_type | " |
| Dt_chr10 | Cufflinks | exon | 19962107 | 19962211 | . | + | . | gene_id | "XLOC_134136"; | transcript_id | "Novel_001869"; | exon_number | "3"; | gene_type | " |
| Dt_chr10 | Cufflinks | exon | 20675398 | 20675621 | . | + | . | gene_id | "XLOC_134212"; | transcript_id | "Novel_001870"; | exon_number | "1"; | gene_type | " |
| Dt_chr10 | Cufflinks | exon | 21705446 | 21705738 | . | + | . | gene_id | "XLOC_134275"; | transcript_id | "Novel_001871"; | exon_number | "1"; | gene_type | " |
| Dt_chr10 | Cufflinks | exon | 21705880 | 21706230 | . | + | . | gene_id | "XLOC_134275"; | transcript_id | "Novel_001871"; | exon_number | "2"; | gene_type | " |
| Dt_chr10 | Cufflinks | exon | 22172172 | 22172634 | . | + | . | gene_id | "XLOC_134327"; | transcript_id | "Novel_001872"; | exon_number | "1"; | gene_type | " |
| Dt_chr10 | Cufflinks | exon | 22173029 | 22174285 | . | + | . | gene_id | "XLOC_134327"; | transcript_id | "Novel_001872"; | exon_number | "2"; | gene_type | " |
| Dt_chr10 | Cufflinks | exon | 22756094 | 22756529 | . | + | . | gene_id | "XLOC_134398"; | transcript_id | "Novel_001873"; | exon_number | "1"; | gene_type | " |
| Dt_chr10 | Cufflinks | exon | 22758696 | 22759128 | . | + | . | gene_id | "XLOC_134398"; | transcript_id | "Novel_001873"; | exon_number | "2"; | gene_type | " |
| Dt_chr10 | Cufflinks | exon | 22756107 | 22756384 | . | + | . | gene_id | "XLOC_134398"; | transcript_id | "Novel_001874"; | exon_number | "1"; | gene_type | " |
| Dt_chr10 | Cufflinks | exon | 22756477 | 22756529 | . | + | . | gene_id | "XLOC_134398"; | transcript_id | "Novel_001874"; | exon_number | "2"; | gene_type | " |
| Dt_chr10 | Cufflinks | exon | 22758696 | 22759105 | . | + | . | gene_id | "XLOC_134398"; | transcript_id | "Novel_001874"; | exon_number | "3"; | gene_type | " |
| Dt_chr10 | Cufflinks | exon | 23302643 | 23302892 | . | + | . | gene_id | "XLOC_134454"; | transcript_id | "Novel_001875"; | exon_number | "1"; | gene_type | " |
| Dt_chr10 | Cufflinks | exon | 23304301 | 23306843 | . | + | . | gene_id | "XLOC_134454"; | transcript_id | "Novel_001875"; | exon_number | "2"; | gene_type | " |
| Dt_chr10 | Cufflinks | exon | 25745129 | 25745366 | . | + | . | gene_id | "XLOC_134739"; | transcript_id | "Novel_001876"; | exon_number | "1"; | gene_type | " |
| Dt_chr10 | Cufflinks | exon | 25745986 | 25746233 | . | + | . | gene_id | "XLOC_134739"; | transcript_id | "Novel_001876"; | exon_number | "2"; | gene_type | " |
| Dt_chr10 | Cufflinks | exon | 26841524 | 26841692 | . | + | . | gene_id | "XLOC_134854"; | transcript_id | "Novel_001877"; | exon_number | "1"; | gene_type | " |
| Dt_chr10 | Cufflinks | exon | 26843100 | 26843147 | . | + | . | gene_id | "XLOC_134854"; | transcript_id | "Novel_001877"; | exon_number | "2"; | gene_type | " |
| Dt_chr10 | Cufflinks | exon | 26844585 | 26847528 | . | + | . | gene_id | "XLOC_134854"; | transcript_id | "Novel_001877"; | exon_number | "3"; | gene_type | " |
| Dt_chr10 | Cufflinks | exon | 28563247 | 28563418 | . | + | . | gene_id | "XLOC_135009"; | transcript_id | "Novel_001878"; | exon_number | "1"; | gene_type | " |
| Dt_chr10 | Cufflinks | exon | 28563792 | 28564311 | . | + | . | gene_id | "XLOC_135009"; | transcript_id | "Novel_001878"; | exon_number | "2"; | gene_type | " |
| Dt_chr10 | Cufflinks | exon | 28564499 | 28564855 | . | + | . | gene_id | "XLOC_135009"; | transcript_id | "Novel_001878"; | exon_number | "3"; | gene_type | " |
| Dt_chr10 | Cufflinks | exon | 28564952 | 28565059 | . | + | . | gene_id | "XLOC_135009"; | transcript_id | "Novel_001878"; | exon_number | "4"; | gene_type | " |
| Dt_chr10 | Cufflinks | exon | 28565145 | 28565285 | . | + | . | gene_id | "XLOC_135009"; | transcript_id | "Novel_001878"; | exon_number | "5"; | gene_type | " |
| Dt_chr10 | Cufflinks | exon | 28565390 | 28566092 | . | + | . | gene_id | "XLOC_135009"; | transcript_id | "Novel_001878"; | exon_number | "6"; | gene_type | " |
| Dt_chr10 | Cufflinks | exon | 28563254 | 28563418 | . | + | . | gene_id | "XLOC_135009"; | transcript_id | "Novel_001879"; | exon_number | "1"; | gene_type | " |
| Dt_chr10 | Cufflinks | exon | 28563792 | 28563957 | . | + | . | gene_id | "XLOC_135009"; | transcript_id | "Novel_001879"; | exon_number | "2"; | gene_type | " |



|          |           |      |          |          |   |   |   |         |                |               |                 |             |      |           |   |
|----------|-----------|------|----------|----------|---|---|---|---------|----------------|---------------|-----------------|-------------|------|-----------|---|
| Dt_chr10 | Cufflinks | exon | 30478428 | 30478523 | . | + | . | gene_id | "XLOC_135224"; | transcript_id | "Novel_001887"; | exon_number | "4"; | gene_type | " |
| Dt_chr10 | Cufflinks | exon | 30478598 | 30479289 | . | + | . | gene_id | "XLOC_135224"; | transcript_id | "Novel_001887"; | exon_number | "5"; | gene_type | " |
| Dt_chr10 | Cufflinks | exon | 34796281 | 34796891 | . | + | . | gene_id | "XLOC_135440"; | transcript_id | "Novel_001888"; | exon_number | "1"; | gene_type | " |
| Dt_chr10 | Cufflinks | exon | 34796999 | 34799443 | . | + | . | gene_id | "XLOC_135440"; | transcript_id | "Novel_001888"; | exon_number | "2"; | gene_type | " |
| Dt_chr10 | Cufflinks | exon | 34800253 | 34800404 | . | + | . | gene_id | "XLOC_135440"; | transcript_id | "Novel_001888"; | exon_number | "3"; | gene_type | " |
| Dt_chr10 | Cufflinks | exon | 34800566 | 34800870 | . | + | . | gene_id | "XLOC_135440"; | transcript_id | "Novel_001888"; | exon_number | "4"; | gene_type | " |
| Dt_chr10 | Cufflinks | exon | 35752140 | 35752479 | . | + | . | gene_id | "XLOC_135493"; | transcript_id | "Novel_001889"; | exon_number | "1"; | gene_type | " |
| Dt_chr10 | Cufflinks | exon | 35753958 | 35756579 | . | + | . | gene_id | "XLOC_135493"; | transcript_id | "Novel_001889"; | exon_number | "2"; | gene_type | " |
| Dt_chr10 | Cufflinks | exon | 40459780 | 40459888 | . | + | . | gene_id | "XLOC_135669"; | transcript_id | "Novel_001890"; | exon_number | "1"; | gene_type | " |
| Dt_chr10 | Cufflinks | exon | 40460186 | 40460337 | . | + | . | gene_id | "XLOC_135669"; | transcript_id | "Novel_001890"; | exon_number | "2"; | gene_type | " |
| Dt_chr10 | Cufflinks | exon | 40460649 | 40460752 | . | + | . | gene_id | "XLOC_135669"; | transcript_id | "Novel_001890"; | exon_number | "3"; | gene_type | " |
| Dt_chr10 | Cufflinks | exon | 40461152 | 40461241 | . | + | . | gene_id | "XLOC_135669"; | transcript_id | "Novel_001890"; | exon_number | "4"; | gene_type | " |
| Dt_chr10 | Cufflinks | exon | 40461430 | 40461501 | . | + | . | gene_id | "XLOC_135669"; | transcript_id | "Novel_001890"; | exon_number | "5"; | gene_type | " |
| Dt_chr10 | Cufflinks | exon | 40461714 | 40461814 | . | + | . | gene_id | "XLOC_135669"; | transcript_id | "Novel_001890"; | exon_number | "6"; | gene_type | " |
| Dt_chr10 | Cufflinks | exon | 40461923 | 40462699 | . | + | . | gene_id | "XLOC_135669"; | transcript_id | "Novel_001890"; | exon_number | "7"; | gene_type | " |
| Dt_chr10 | Cufflinks | exon | 41370251 | 41370306 | . | + | . | gene_id | "XLOC_135702"; | transcript_id | "Novel_001891"; | exon_number | "1"; | gene_type | " |
| Dt_chr10 | Cufflinks | exon | 41370630 | 41370782 | . | + | . | gene_id | "XLOC_135702"; | transcript_id | "Novel_001891"; | exon_number | "2"; | gene_type | " |
| Dt_chr10 | Cufflinks | exon | 41370868 | 41370987 | . | + | . | gene_id | "XLOC_135702"; | transcript_id | "Novel_001891"; | exon_number | "3"; | gene_type | " |
| Dt_chr10 | Cufflinks | exon | 49485615 | 49486187 | . | + | . | gene_id | "XLOC_136280"; | transcript_id | "Novel_001892"; | exon_number | "1"; | gene_type | " |
| Dt_chr10 | Cufflinks | exon | 3940425  | 3941365  | . | - | . | gene_id | "XLOC_137102"; | transcript_id | "Novel_001893"; | exon_number | "1"; | gene_type | " |
| Dt_chr10 | Cufflinks | exon | 3941909  | 3943504  | . | - | . | gene_id | "XLOC_137102"; | transcript_id | "Novel_001893"; | exon_number | "2"; | gene_type | " |
| Dt_chr10 | Cufflinks | exon | 7431043  | 7434013  | . | - | . | gene_id | "XLOC_137318"; | transcript_id | "Novel_001894"; | exon_number | "1"; | gene_type | " |
| Dt_chr10 | Cufflinks | exon | 7436213  | 7436414  | . | - | . | gene_id | "XLOC_137318"; | transcript_id | "Novel_001894"; | exon_number | "2"; | gene_type | " |
| Dt_chr10 | Cufflinks | exon | 7431540  | 7431770  | . | - | . | gene_id | "XLOC_137318"; | transcript_id | "Novel_001895"; | exon_number | "1"; | gene_type | " |
| Dt_chr10 | Cufflinks | exon | 7431892  | 7431947  | . | - | . | gene_id | "XLOC_137318"; | transcript_id | "Novel_001895"; | exon_number | "2"; | gene_type | " |
| Dt_chr10 | Cufflinks | exon | 7432036  | 7434013  | . | - | . | gene_id | "XLOC_137318"; | transcript_id | "Novel_001895"; | exon_number | "3"; | gene_type | " |
| Dt_chr10 | Cufflinks | exon | 7436213  | 7436374  | . | - | . | gene_id | "XLOC_137318"; | transcript_id | "Novel_001895"; | exon_number | "4"; | gene_type | " |
| Dt_chr10 | Cufflinks | exon | 8881714  | 8881932  | . | - | . | gene_id | "XLOC_137463"; | transcript_id | "Novel_001896"; | exon_number | "1"; | gene_type | " |
| Dt_chr10 | Cufflinks | exon | 9131937  | 9133771  | . | - | . | gene_id | "XLOC_137517"; | transcript_id | "Novel_001897"; | exon_number | "1"; | gene_type | " |
| Dt_chr10 | Cufflinks | exon | 9134044  | 9134323  | . | - | . | gene_id | "XLOC_137517"; | transcript_id | "Novel_001897"; | exon_number | "2"; | gene_type | " |
| Dt_chr10 | Cufflinks | exon | 10829797 | 10830666 | . | - | . | gene_id | "XLOC_137699"; | transcript_id | "Novel_001898"; | exon_number | "1"; | gene_type | " |
| Dt_chr10 | Cufflinks | exon | 10830841 | 10830905 | . | - | . | gene_id | "XLOC_137699"; | transcript_id | "Novel_001898"; | exon_number | "2"; | gene_type | " |
| Dt_chr10 | Cufflinks | exon | 10831197 | 10831466 | . | - | . | gene_id | "XLOC_137699"; | transcript_id | "Novel_001898"; | exon_number | "3"; | gene_type | " |
| Dt_chr10 | Cufflinks | exon | 12303497 | 12303995 | . | - | . | gene_id | "XLOC_137829"; | transcript_id | "Novel_001899"; | exon_number | "1"; | gene_type | " |
| Dt_chr10 | Cufflinks | exon | 12304079 | 12304194 | . | - | . | gene_id | "XLOC_137829"; | transcript_id | "Novel_001899"; | exon_number | "2"; | gene_type | " |

|          |           |      |          |          |   |   |   |         |                |               |                 |             |      |           |   |
|----------|-----------|------|----------|----------|---|---|---|---------|----------------|---------------|-----------------|-------------|------|-----------|---|
| Dt_chr10 | Cufflinks | exon | 12306573 | 12306923 | . | - | . | gene_id | "XLOC_137829"; | transcript_id | "Novel_001899"; | exon_number | "3"; | gene_type | " |
| Dt_chr10 | Cufflinks | exon | 13516880 | 13517441 | . | - | . | gene_id | "XLOC_137901"; | transcript_id | "Novel_001900"; | exon_number | "1"; | gene_type | " |
| Dt_chr10 | Cufflinks | exon | 13517565 | 13517673 | . | - | . | gene_id | "XLOC_137901"; | transcript_id | "Novel_001900"; | exon_number | "2"; | gene_type | " |
| Dt_chr10 | Cufflinks | exon | 13517752 | 13517873 | . | - | . | gene_id | "XLOC_137901"; | transcript_id | "Novel_001900"; | exon_number | "3"; | gene_type | " |
| Dt_chr10 | Cufflinks | exon | 13517950 | 13517991 | . | - | . | gene_id | "XLOC_137901"; | transcript_id | "Novel_001900"; | exon_number | "4"; | gene_type | " |
| Dt_chr10 | Cufflinks | exon | 13519433 | 13519479 | . | - | . | gene_id | "XLOC_137901"; | transcript_id | "Novel_001900"; | exon_number | "5"; | gene_type | " |
| Dt_chr10 | Cufflinks | exon | 13519563 | 13519902 | . | - | . | gene_id | "XLOC_137901"; | transcript_id | "Novel_001900"; | exon_number | "6"; | gene_type | " |
| Dt_chr10 | Cufflinks | exon | 13519990 | 13520368 | . | - | . | gene_id | "XLOC_137901"; | transcript_id | "Novel_001900"; | exon_number | "7"; | gene_type | " |
| Dt_chr10 | Cufflinks | exon | 16456436 | 16456809 | . | - | . | gene_id | "XLOC_138150"; | transcript_id | "Novel_001901"; | exon_number | "1"; | gene_type | " |
| Dt_chr10 | Cufflinks | exon | 16456888 | 16459458 | . | - | . | gene_id | "XLOC_138150"; | transcript_id | "Novel_001901"; | exon_number | "2"; | gene_type | " |
| Dt_chr10 | Cufflinks | exon | 17546412 | 17546781 | . | - | . | gene_id | "XLOC_138252"; | transcript_id | "Novel_001902"; | exon_number | "1"; | gene_type | " |
| Dt_chr10 | Cufflinks | exon | 17549134 | 17549373 | . | - | . | gene_id | "XLOC_138252"; | transcript_id | "Novel_001902"; | exon_number | "2"; | gene_type | " |
| Dt_chr10 | Cufflinks | exon | 18950609 | 18951077 | . | - | . | gene_id | "XLOC_138363"; | transcript_id | "Novel_001903"; | exon_number | "1"; | gene_type | " |
| Dt_chr10 | Cufflinks | exon | 18951343 | 18952416 | . | - | . | gene_id | "XLOC_138363"; | transcript_id | "Novel_001903"; | exon_number | "2"; | gene_type | " |
| Dt_chr10 | Cufflinks | exon | 18950611 | 18951077 | . | - | . | gene_id | "XLOC_138363"; | transcript_id | "Novel_001904"; | exon_number | "1"; | gene_type | " |
| Dt_chr10 | Cufflinks | exon | 18951343 | 18951443 | . | - | . | gene_id | "XLOC_138363"; | transcript_id | "Novel_001904"; | exon_number | "2"; | gene_type | " |
| Dt_chr10 | Cufflinks | exon | 18952376 | 18952525 | . | - | . | gene_id | "XLOC_138363"; | transcript_id | "Novel_001904"; | exon_number | "3"; | gene_type | " |
| Dt_chr10 | Cufflinks | exon | 18952947 | 18953010 | . | - | . | gene_id | "XLOC_138363"; | transcript_id | "Novel_001904"; | exon_number | "4"; | gene_type | " |
| Dt_chr10 | Cufflinks | exon | 18953108 | 18953148 | . | - | . | gene_id | "XLOC_138363"; | transcript_id | "Novel_001904"; | exon_number | "5"; | gene_type | " |
| Dt_chr10 | Cufflinks | exon | 18953237 | 18953699 | . | - | . | gene_id | "XLOC_138363"; | transcript_id | "Novel_001904"; | exon_number | "6"; | gene_type | " |
| Dt_chr10 | Cufflinks | exon | 19875637 | 19876002 | . | - | . | gene_id | "XLOC_138440"; | transcript_id | "Novel_001905"; | exon_number | "1"; | gene_type | " |
| Dt_chr10 | Cufflinks | exon | 19876089 | 19876166 | . | - | . | gene_id | "XLOC_138440"; | transcript_id | "Novel_001905"; | exon_number | "2"; | gene_type | " |
| Dt_chr10 | Cufflinks | exon | 19876260 | 19876439 | . | - | . | gene_id | "XLOC_138440"; | transcript_id | "Novel_001905"; | exon_number | "3"; | gene_type | " |
| Dt_chr10 | Cufflinks | exon | 19876520 | 19876609 | . | - | . | gene_id | "XLOC_138440"; | transcript_id | "Novel_001905"; | exon_number | "4"; | gene_type | " |
| Dt_chr10 | Cufflinks | exon | 19876897 | 19877014 | . | - | . | gene_id | "XLOC_138440"; | transcript_id | "Novel_001905"; | exon_number | "5"; | gene_type | " |
| Dt_chr10 | Cufflinks | exon | 19877117 | 19877173 | . | - | . | gene_id | "XLOC_138440"; | transcript_id | "Novel_001905"; | exon_number | "6"; | gene_type | " |
| Dt_chr10 | Cufflinks | exon | 19877526 | 19877595 | . | - | . | gene_id | "XLOC_138440"; | transcript_id | "Novel_001905"; | exon_number | "7"; | gene_type | " |
| Dt_chr10 | Cufflinks | exon | 19877711 | 19877951 | . | - | . | gene_id | "XLOC_138440"; | transcript_id | "Novel_001905"; | exon_number | "8"; | gene_type | " |
| Dt_chr10 | Cufflinks | exon | 21881129 | 21881334 | . | - | . | gene_id | "XLOC_138631"; | transcript_id | "Novel_001906"; | exon_number | "1"; | gene_type | " |
| Dt_chr10 | Cufflinks | exon | 21881480 | 21881772 | . | - | . | gene_id | "XLOC_138631"; | transcript_id | "Novel_001906"; | exon_number | "2"; | gene_type | " |
| Dt_chr10 | Cufflinks | exon | 21882139 | 21882479 | . | - | . | gene_id | "XLOC_138631"; | transcript_id | "Novel_001906"; | exon_number | "3"; | gene_type | " |
| Dt_chr10 | Cufflinks | exon | 22619903 | 22620488 | . | - | . | gene_id | "XLOC_138698"; | transcript_id | "Novel_001907"; | exon_number | "1"; | gene_type | " |
| Dt_chr10 | Cufflinks | exon | 22620686 | 22620766 | . | - | . | gene_id | "XLOC_138698"; | transcript_id | "Novel_001907"; | exon_number | "2"; | gene_type | " |
| Dt_chr10 | Cufflinks | exon | 22620893 | 22620956 | . | - | . | gene_id | "XLOC_138698"; | transcript_id | "Novel_001907"; | exon_number | "3"; | gene_type | " |
| Dt_chr10 | Cufflinks | exon | 22621043 | 22621106 | . | - | . | gene_id | "XLOC_138698"; | transcript_id | "Novel_001907"; | exon_number | "4"; | gene_type | " |

|          |           |      |          |          |   |   |         |                |               |                 |             |      |           |   |
|----------|-----------|------|----------|----------|---|---|---------|----------------|---------------|-----------------|-------------|------|-----------|---|
| Dt_chr10 | Cufflinks | exon | 22621341 | 22621395 | . | . | gene_id | "XLOC_138698"; | transcript_id | "Novel_001907"; | exon_number | "5"; | gene_type | " |
| Dt_chr10 | Cufflinks | exon | 22621840 | 22621893 | . | . | gene_id | "XLOC_138698"; | transcript_id | "Novel_001907"; | exon_number | "6"; | gene_type | " |
| Dt_chr10 | Cufflinks | exon | 22621888 | 22621933 | . | . | gene_id | "XLOC_138698"; | transcript_id | "Novel_001908"; | exon_number | "1"; | gene_type | " |
| Dt_chr10 | Cufflinks | exon | 22622543 | 22622592 | . | . | gene_id | "XLOC_138698"; | transcript_id | "Novel_001908"; | exon_number | "2"; | gene_type | " |
| Dt_chr10 | Cufflinks | exon | 22622676 | 22622770 | . | . | gene_id | "XLOC_138698"; | transcript_id | "Novel_001908"; | exon_number | "3"; | gene_type | " |
| Dt_chr10 | Cufflinks | exon | 22622866 | 22622940 | . | . | gene_id | "XLOC_138698"; | transcript_id | "Novel_001908"; | exon_number | "4"; | gene_type | " |
| Dt_chr10 | Cufflinks | exon | 22623151 | 22623206 | . | . | gene_id | "XLOC_138698"; | transcript_id | "Novel_001908"; | exon_number | "5"; | gene_type | " |
| Dt_chr10 | Cufflinks | exon | 22623341 | 22623702 | . | . | gene_id | "XLOC_138698"; | transcript_id | "Novel_001908"; | exon_number | "6"; | gene_type | " |
| Dt_chr10 | Cufflinks | exon | 22935796 | 22936043 | . | . | gene_id | "XLOC_138725"; | transcript_id | "Novel_001909"; | exon_number | "1"; | gene_type | " |
| Dt_chr10 | Cufflinks | exon | 22936796 | 22936864 | . | . | gene_id | "XLOC_138725"; | transcript_id | "Novel_001909"; | exon_number | "2"; | gene_type | " |
| Dt_chr10 | Cufflinks | exon | 22936957 | 22937032 | . | . | gene_id | "XLOC_138725"; | transcript_id | "Novel_001909"; | exon_number | "3"; | gene_type | " |
| Dt_chr10 | Cufflinks | exon | 22937127 | 22937175 | . | . | gene_id | "XLOC_138725"; | transcript_id | "Novel_001909"; | exon_number | "4"; | gene_type | " |
| Dt_chr10 | Cufflinks | exon | 22937277 | 22937854 | . | . | gene_id | "XLOC_138725"; | transcript_id | "Novel_001909"; | exon_number | "5"; | gene_type | " |
| Dt_chr10 | Cufflinks | exon | 22937948 | 22937982 | . | . | gene_id | "XLOC_138725"; | transcript_id | "Novel_001910"; | exon_number | "1"; | gene_type | " |
| Dt_chr10 | Cufflinks | exon | 22938255 | 22939259 | . | . | gene_id | "XLOC_138725"; | transcript_id | "Novel_001910"; | exon_number | "2"; | gene_type | " |
| Dt_chr10 | Cufflinks | exon | 23137427 | 23140739 | . | . | gene_id | "XLOC_138748"; | transcript_id | "Novel_001911"; | exon_number | "1"; | gene_type | " |
| Dt_chr10 | Cufflinks | exon | 23141731 | 23142073 | . | . | gene_id | "XLOC_138748"; | transcript_id | "Novel_001911"; | exon_number | "2"; | gene_type | " |
| Dt_chr10 | Cufflinks | exon | 23349113 | 23351317 | . | . | gene_id | "XLOC_138770"; | transcript_id | "Novel_001912"; | exon_number | "1"; | gene_type | " |
| Dt_chr10 | Cufflinks | exon | 23352725 | 23352989 | . | . | gene_id | "XLOC_138770"; | transcript_id | "Novel_001912"; | exon_number | "2"; | gene_type | " |
| Dt_chr10 | Cufflinks | exon | 25284053 | 25285350 | . | . | gene_id | "XLOC_139004"; | transcript_id | "Novel_001913"; | exon_number | "1"; | gene_type | " |
| Dt_chr10 | Cufflinks | exon | 25285506 | 25285819 | . | . | gene_id | "XLOC_139004"; | transcript_id | "Novel_001913"; | exon_number | "2"; | gene_type | " |
| Dt_chr10 | Cufflinks | exon | 25621417 | 25621949 | . | . | gene_id | "XLOC_139025"; | transcript_id | "Novel_001914"; | exon_number | "1"; | gene_type | " |
| Dt_chr10 | Cufflinks | exon | 25622233 | 25622317 | . | . | gene_id | "XLOC_139025"; | transcript_id | "Novel_001914"; | exon_number | "2"; | gene_type | " |
| Dt_chr10 | Cufflinks | exon | 25630755 | 25631871 | . | . | gene_id | "XLOC_139028"; | transcript_id | "Novel_001915"; | exon_number | "1"; | gene_type | " |
| Dt_chr10 | Cufflinks | exon | 25632915 | 25632962 | . | . | gene_id | "XLOC_139028"; | transcript_id | "Novel_001915"; | exon_number | "2"; | gene_type | " |
| Dt_chr10 | Cufflinks | exon | 25633092 | 25633166 | . | . | gene_id | "XLOC_139028"; | transcript_id | "Novel_001915"; | exon_number | "3"; | gene_type | " |
| Dt_chr10 | Cufflinks | exon | 25633445 | 25633682 | . | . | gene_id | "XLOC_139028"; | transcript_id | "Novel_001915"; | exon_number | "4"; | gene_type | " |
| Dt_chr10 | Cufflinks | exon | 25631935 | 25632962 | . | . | gene_id | "XLOC_139028"; | transcript_id | "Novel_001916"; | exon_number | "1"; | gene_type | " |
| Dt_chr10 | Cufflinks | exon | 25633092 | 25633166 | . | . | gene_id | "XLOC_139028"; | transcript_id | "Novel_001916"; | exon_number | "2"; | gene_type | " |
| Dt_chr10 | Cufflinks | exon | 25633445 | 25633682 | . | . | gene_id | "XLOC_139028"; | transcript_id | "Novel_001916"; | exon_number | "3"; | gene_type | " |
| Dt_chr10 | Cufflinks | exon | 26502093 | 26502322 | . | . | gene_id | "XLOC_139094"; | transcript_id | "Novel_001917"; | exon_number | "1"; | gene_type | " |
| Dt_chr10 | Cufflinks | exon | 27079701 | 27080252 | . | . | gene_id | "XLOC_139138"; | transcript_id | "Novel_001918"; | exon_number | "1"; | gene_type | " |
| Dt_chr10 | Cufflinks | exon | 27080474 | 27080535 | . | . | gene_id | "XLOC_139138"; | transcript_id | "Novel_001918"; | exon_number | "2"; | gene_type | " |
| Dt_chr10 | Cufflinks | exon | 27080624 | 27080732 | . | . | gene_id | "XLOC_139138"; | transcript_id | "Novel_001918"; | exon_number | "3"; | gene_type | " |
| Dt_chr10 | Cufflinks | exon | 27081046 | 27081103 | . | . | gene_id | "XLOC_139138"; | transcript_id | "Novel_001918"; | exon_number | "4"; | gene_type | " |



|          |           |      |          |          |   |   |         |                |               |                 |             |      |           |   |
|----------|-----------|------|----------|----------|---|---|---------|----------------|---------------|-----------------|-------------|------|-----------|---|
| Dt_chr10 | Cufflinks | exon | 27081372 | 27081449 | . | . | gene_id | "XLOC_139138"; | transcript_id | "Novel_001918"; | exon_number | "5"; | gene_type | " |
| Dt_chr10 | Cufflinks | exon | 27082399 | 27082448 | . | . | gene_id | "XLOC_139138"; | transcript_id | "Novel_001918"; | exon_number | "6"; | gene_type | " |
| Dt_chr10 | Cufflinks | exon | 27082638 | 27082718 | . | . | gene_id | "XLOC_139138"; | transcript_id | "Novel_001918"; | exon_number | "7"; | gene_type | " |
| Dt_chr10 | Cufflinks | exon | 27082909 | 27083107 | . | . | gene_id | "XLOC_139138"; | transcript_id | "Novel_001918"; | exon_number | "8"; | gene_type | " |
| Dt_chr10 | Cufflinks | exon | 27080719 | 27081103 | . | . | gene_id | "XLOC_139138"; | transcript_id | "Novel_001919"; | exon_number | "1"; | gene_type | " |
| Dt_chr10 | Cufflinks | exon | 27081372 | 27081449 | . | . | gene_id | "XLOC_139138"; | transcript_id | "Novel_001919"; | exon_number | "2"; | gene_type | " |
| Dt_chr10 | Cufflinks | exon | 27082399 | 27082448 | . | . | gene_id | "XLOC_139138"; | transcript_id | "Novel_001919"; | exon_number | "3"; | gene_type | " |
| Dt_chr10 | Cufflinks | exon | 27082638 | 27082718 | . | . | gene_id | "XLOC_139138"; | transcript_id | "Novel_001919"; | exon_number | "4"; | gene_type | " |
| Dt_chr10 | Cufflinks | exon | 27082909 | 27083106 | . | . | gene_id | "XLOC_139138"; | transcript_id | "Novel_001919"; | exon_number | "5"; | gene_type | " |
| Dt_chr10 | Cufflinks | exon | 27081107 | 27081449 | . | . | gene_id | "XLOC_139138"; | transcript_id | "Novel_001920"; | exon_number | "1"; | gene_type | " |
| Dt_chr10 | Cufflinks | exon | 27082399 | 27082448 | . | . | gene_id | "XLOC_139138"; | transcript_id | "Novel_001920"; | exon_number | "2"; | gene_type | " |
| Dt_chr10 | Cufflinks | exon | 27082638 | 27082718 | . | . | gene_id | "XLOC_139138"; | transcript_id | "Novel_001920"; | exon_number | "3"; | gene_type | " |
| Dt_chr10 | Cufflinks | exon | 27082909 | 27083107 | . | . | gene_id | "XLOC_139138"; | transcript_id | "Novel_001920"; | exon_number | "4"; | gene_type | " |
| Dt_chr10 | Cufflinks | exon | 27392895 | 27393863 | . | . | gene_id | "XLOC_139173"; | transcript_id | "Novel_001921"; | exon_number | "1"; | gene_type | " |
| Dt_chr10 | Cufflinks | exon | 27393974 | 27394912 | . | . | gene_id | "XLOC_139173"; | transcript_id | "Novel_001921"; | exon_number | "2"; | gene_type | " |
| Dt_chr10 | Cufflinks | exon | 27568246 | 27568576 | . | . | gene_id | "XLOC_139187"; | transcript_id | "Novel_001922"; | exon_number | "1"; | gene_type | " |
| Dt_chr10 | Cufflinks | exon | 27568670 | 27568742 | . | . | gene_id | "XLOC_139187"; | transcript_id | "Novel_001922"; | exon_number | "2"; | gene_type | " |
| Dt_chr10 | Cufflinks | exon | 27569407 | 27569478 | . | . | gene_id | "XLOC_139187"; | transcript_id | "Novel_001922"; | exon_number | "3"; | gene_type | " |
| Dt_chr10 | Cufflinks | exon | 27569604 | 27569672 | . | . | gene_id | "XLOC_139187"; | transcript_id | "Novel_001922"; | exon_number | "4"; | gene_type | " |
| Dt_chr10 | Cufflinks | exon | 27569769 | 27569899 | . | . | gene_id | "XLOC_139187"; | transcript_id | "Novel_001922"; | exon_number | "5"; | gene_type | " |
| Dt_chr10 | Cufflinks | exon | 27570283 | 27570386 | . | . | gene_id | "XLOC_139187"; | transcript_id | "Novel_001922"; | exon_number | "6"; | gene_type | " |
| Dt_chr10 | Cufflinks | exon | 27577125 | 27577339 | . | . | gene_id | "XLOC_139191"; | transcript_id | "Novel_001923"; | exon_number | "1"; | gene_type | " |
| Dt_chr10 | Cufflinks | exon | 27577487 | 27577533 | . | . | gene_id | "XLOC_139191"; | transcript_id | "Novel_001923"; | exon_number | "2"; | gene_type | " |
| Dt_chr10 | Cufflinks | exon | 27577917 | 27578535 | . | . | gene_id | "XLOC_139191"; | transcript_id | "Novel_001923"; | exon_number | "3"; | gene_type | " |
| Dt_chr10 | Cufflinks | exon | 27577125 | 27577339 | . | . | gene_id | "XLOC_139191"; | transcript_id | "Novel_001924"; | exon_number | "1"; | gene_type | " |
| Dt_chr10 | Cufflinks | exon | 27577487 | 27577533 | . | . | gene_id | "XLOC_139191"; | transcript_id | "Novel_001924"; | exon_number | "2"; | gene_type | " |
| Dt_chr10 | Cufflinks | exon | 27577917 | 27577973 | . | . | gene_id | "XLOC_139191"; | transcript_id | "Novel_001924"; | exon_number | "3"; | gene_type | " |
| Dt_chr10 | Cufflinks | exon | 27578863 | 27578918 | . | . | gene_id | "XLOC_139191"; | transcript_id | "Novel_001924"; | exon_number | "4"; | gene_type | " |
| Dt_chr10 | Cufflinks | exon | 27577174 | 27577339 | . | . | gene_id | "XLOC_139191"; | transcript_id | "Novel_001925"; | exon_number | "1"; | gene_type | " |
| Dt_chr10 | Cufflinks | exon | 27577487 | 27577759 | . | . | gene_id | "XLOC_139191"; | transcript_id | "Novel_001925"; | exon_number | "2"; | gene_type | " |
| Dt_chr10 | Cufflinks | exon | 27585128 | 27585480 | . | . | gene_id | "XLOC_139193"; | transcript_id | "Novel_001926"; | exon_number | "1"; | gene_type | " |
| Dt_chr10 | Cufflinks | exon | 27585580 | 27586056 | . | . | gene_id | "XLOC_139193"; | transcript_id | "Novel_001926"; | exon_number | "2"; | gene_type | " |
| Dt_chr10 | Cufflinks | exon | 27586108 | 27586966 | . | . | gene_id | "XLOC_139193"; | transcript_id | "Novel_001927"; | exon_number | "1"; | gene_type | " |
| Dt_chr10 | Cufflinks | exon | 27587069 | 27587116 | . | . | gene_id | "XLOC_139193"; | transcript_id | "Novel_001927"; | exon_number | "2"; | gene_type | " |
| Dt_chr10 | Cufflinks | exon | 27587204 | 27587302 | . | . | gene_id | "XLOC_139193"; | transcript_id | "Novel_001927"; | exon_number | "3"; | gene_type | " |

|          |           |      |          |          |   |   |         |                |               |                 |             |      |           |   |
|----------|-----------|------|----------|----------|---|---|---------|----------------|---------------|-----------------|-------------|------|-----------|---|
| Dt_chr10 | Cufflinks | exon | 27587414 | 27587571 | . | . | gene_id | "XLOC_139193"; | transcript_id | "Novel_001927"; | exon_number | "4"; | gene_type | " |
| Dt_chr10 | Cufflinks | exon | 27747791 | 27748332 | . | . | gene_id | "XLOC_139201"; | transcript_id | "Novel_001928"; | exon_number | "1"; | gene_type | " |
| Dt_chr10 | Cufflinks | exon | 27748479 | 27748628 | . | . | gene_id | "XLOC_139201"; | transcript_id | "Novel_001928"; | exon_number | "2"; | gene_type | " |
| Dt_chr10 | Cufflinks | exon | 27748784 | 27748883 | . | . | gene_id | "XLOC_139201"; | transcript_id | "Novel_001928"; | exon_number | "3"; | gene_type | " |
| Dt_chr10 | Cufflinks | exon | 27749008 | 27749330 | . | . | gene_id | "XLOC_139201"; | transcript_id | "Novel_001928"; | exon_number | "4"; | gene_type | " |
| Dt_chr10 | Cufflinks | exon | 27749405 | 27749539 | . | . | gene_id | "XLOC_139201"; | transcript_id | "Novel_001928"; | exon_number | "5"; | gene_type | " |
| Dt_chr10 | Cufflinks | exon | 27749650 | 27749725 | . | . | gene_id | "XLOC_139201"; | transcript_id | "Novel_001928"; | exon_number | "6"; | gene_type | " |
| Dt_chr10 | Cufflinks | exon | 27750220 | 27750393 | . | . | gene_id | "XLOC_139201"; | transcript_id | "Novel_001929"; | exon_number | "1"; | gene_type | " |
| Dt_chr10 | Cufflinks | exon | 27750485 | 27750614 | . | . | gene_id | "XLOC_139201"; | transcript_id | "Novel_001929"; | exon_number | "2"; | gene_type | " |
| Dt_chr10 | Cufflinks | exon | 27752274 | 27752992 | . | . | gene_id | "XLOC_139201"; | transcript_id | "Novel_001930"; | exon_number | "1"; | gene_type | " |
| Dt_chr10 | Cufflinks | exon | 27753101 | 27753365 | . | . | gene_id | "XLOC_139201"; | transcript_id | "Novel_001930"; | exon_number | "2"; | gene_type | " |
| Dt_chr10 | Cufflinks | exon | 28672486 | 28672830 | . | . | gene_id | "XLOC_139271"; | transcript_id | "Novel_001931"; | exon_number | "1"; | gene_type | " |
| Dt_chr10 | Cufflinks | exon | 28673166 | 28673839 | . | . | gene_id | "XLOC_139271"; | transcript_id | "Novel_001931"; | exon_number | "2"; | gene_type | " |
| Dt_chr10 | Cufflinks | exon | 28674119 | 28674297 | . | . | gene_id | "XLOC_139271"; | transcript_id | "Novel_001931"; | exon_number | "3"; | gene_type | " |
| Dt_chr10 | Cufflinks | exon | 28674393 | 28674439 | . | . | gene_id | "XLOC_139271"; | transcript_id | "Novel_001931"; | exon_number | "4"; | gene_type | " |
| Dt_chr10 | Cufflinks | exon | 28674537 | 28674918 | . | . | gene_id | "XLOC_139271"; | transcript_id | "Novel_001931"; | exon_number | "5"; | gene_type | " |
| Dt_chr10 | Cufflinks | exon | 29281164 | 29283550 | . | . | gene_id | "XLOC_139291"; | transcript_id | "Novel_001932"; | exon_number | "1"; | gene_type | " |
| Dt_chr10 | Cufflinks | exon | 29283912 | 29284246 | . | . | gene_id | "XLOC_139291"; | transcript_id | "Novel_001932"; | exon_number | "2"; | gene_type | " |
| Dt_chr10 | Cufflinks | exon | 29484036 | 29484120 | . | . | gene_id | "XLOC_139317"; | transcript_id | "Novel_001933"; | exon_number | "1"; | gene_type | " |
| Dt_chr10 | Cufflinks | exon | 29485594 | 29486536 | . | . | gene_id | "XLOC_139317"; | transcript_id | "Novel_001933"; | exon_number | "2"; | gene_type | " |
| Dt_chr10 | Cufflinks | exon | 29486671 | 29486828 | . | . | gene_id | "XLOC_139319"; | transcript_id | "Novel_001934"; | exon_number | "1"; | gene_type | " |
| Dt_chr10 | Cufflinks | exon | 29486920 | 29487065 | . | . | gene_id | "XLOC_139319"; | transcript_id | "Novel_001934"; | exon_number | "2"; | gene_type | " |
| Dt_chr10 | Cufflinks | exon | 29951122 | 29951458 | . | . | gene_id | "XLOC_139357"; | transcript_id | "Novel_001935"; | exon_number | "1"; | gene_type | " |
| Dt_chr10 | Cufflinks | exon | 29952176 | 29952298 | . | . | gene_id | "XLOC_139357"; | transcript_id | "Novel_001935"; | exon_number | "2"; | gene_type | " |
| Dt_chr10 | Cufflinks | exon | 29953636 | 29953701 | . | . | gene_id | "XLOC_139357"; | transcript_id | "Novel_001935"; | exon_number | "3"; | gene_type | " |
| Dt_chr10 | Cufflinks | exon | 29954489 | 29954558 | . | . | gene_id | "XLOC_139357"; | transcript_id | "Novel_001935"; | exon_number | "4"; | gene_type | " |
| Dt_chr10 | Cufflinks | exon | 29954636 | 29954780 | . | . | gene_id | "XLOC_139357"; | transcript_id | "Novel_001935"; | exon_number | "5"; | gene_type | " |
| Dt_chr10 | Cufflinks | exon | 29954857 | 29954931 | . | . | gene_id | "XLOC_139357"; | transcript_id | "Novel_001935"; | exon_number | "6"; | gene_type | " |
| Dt_chr10 | Cufflinks | exon | 29955011 | 29955113 | . | . | gene_id | "XLOC_139357"; | transcript_id | "Novel_001935"; | exon_number | "7"; | gene_type | " |
| Dt_chr10 | Cufflinks | exon | 29955199 | 29955255 | . | . | gene_id | "XLOC_139357"; | transcript_id | "Novel_001935"; | exon_number | "8"; | gene_type | " |
| Dt_chr10 | Cufflinks | exon | 29955358 | 29955626 | . | . | gene_id | "XLOC_139357"; | transcript_id | "Novel_001935"; | exon_number | "9"; | gene_type | " |
| Dt_chr10 | Cufflinks | exon | 30084553 | 30085457 | . | . | gene_id | "XLOC_139392"; | transcript_id | "Novel_001936"; | exon_number | "1"; | gene_type | " |
| Dt_chr10 | Cufflinks | exon | 30085640 | 30085781 | . | . | gene_id | "XLOC_139392"; | transcript_id | "Novel_001936"; | exon_number | "2"; | gene_type | " |
| Dt_chr10 | Cufflinks | exon | 30085858 | 30085941 | . | . | gene_id | "XLOC_139392"; | transcript_id | "Novel_001936"; | exon_number | "3"; | gene_type | " |
| Dt_chr10 | Cufflinks | exon | 30086061 | 30086118 | . | . | gene_id | "XLOC_139392"; | transcript_id | "Novel_001936"; | exon_number | "4"; | gene_type | " |



|          |           |      |          |          |   |   |         |                |               |                 |             |      |           |   |
|----------|-----------|------|----------|----------|---|---|---------|----------------|---------------|-----------------|-------------|------|-----------|---|
| Dt_chr10 | Cufflinks | exon | 30697642 | 30697881 | . | . | gene_id | "XLOC_139427"; | transcript_id | "Novel_001942"; | exon_number | "8"; | gene_type | " |
| Dt_chr10 | Cufflinks | exon | 30697975 | 30698177 | . | . | gene_id | "XLOC_139427"; | transcript_id | "Novel_001942"; | exon_number | "9"; | gene_type | " |
| Dt_chr10 | Cufflinks | exon | 30694444 | 30695313 | . | . | gene_id | "XLOC_139427"; | transcript_id | "Novel_001943"; | exon_number | "1"; | gene_type | " |
| Dt_chr10 | Cufflinks | exon | 30695547 | 30695613 | . | . | gene_id | "XLOC_139427"; | transcript_id | "Novel_001943"; | exon_number | "2"; | gene_type | " |
| Dt_chr10 | Cufflinks | exon | 30695947 | 30696092 | . | . | gene_id | "XLOC_139427"; | transcript_id | "Novel_001943"; | exon_number | "3"; | gene_type | " |
| Dt_chr10 | Cufflinks | exon | 30696260 | 30696343 | . | . | gene_id | "XLOC_139427"; | transcript_id | "Novel_001943"; | exon_number | "4"; | gene_type | " |
| Dt_chr10 | Cufflinks | exon | 30696624 | 30696720 | . | . | gene_id | "XLOC_139427"; | transcript_id | "Novel_001943"; | exon_number | "5"; | gene_type | " |
| Dt_chr10 | Cufflinks | exon | 30696820 | 30696862 | . | . | gene_id | "XLOC_139427"; | transcript_id | "Novel_001943"; | exon_number | "6"; | gene_type | " |
| Dt_chr10 | Cufflinks | exon | 30696954 | 30697024 | . | . | gene_id | "XLOC_139427"; | transcript_id | "Novel_001943"; | exon_number | "7"; | gene_type | " |
| Dt_chr10 | Cufflinks | exon | 30697155 | 30698215 | . | . | gene_id | "XLOC_139427"; | transcript_id | "Novel_001943"; | exon_number | "8"; | gene_type | " |
| Dt_chr10 | Cufflinks | exon | 30694595 | 30695313 | . | . | gene_id | "XLOC_139427"; | transcript_id | "Novel_001944"; | exon_number | "1"; | gene_type | " |
| Dt_chr10 | Cufflinks | exon | 30695547 | 30695613 | . | . | gene_id | "XLOC_139427"; | transcript_id | "Novel_001944"; | exon_number | "2"; | gene_type | " |
| Dt_chr10 | Cufflinks | exon | 30695947 | 30696092 | . | . | gene_id | "XLOC_139427"; | transcript_id | "Novel_001944"; | exon_number | "3"; | gene_type | " |
| Dt_chr10 | Cufflinks | exon | 30696260 | 30696720 | . | . | gene_id | "XLOC_139427"; | transcript_id | "Novel_001944"; | exon_number | "4"; | gene_type | " |
| Dt_chr10 | Cufflinks | exon | 30696820 | 30697024 | . | . | gene_id | "XLOC_139427"; | transcript_id | "Novel_001944"; | exon_number | "5"; | gene_type | " |
| Dt_chr10 | Cufflinks | exon | 30697155 | 30697881 | . | . | gene_id | "XLOC_139427"; | transcript_id | "Novel_001944"; | exon_number | "6"; | gene_type | " |
| Dt_chr10 | Cufflinks | exon | 30697975 | 30698177 | . | . | gene_id | "XLOC_139427"; | transcript_id | "Novel_001944"; | exon_number | "7"; | gene_type | " |
| Dt_chr10 | Cufflinks | exon | 30697104 | 30697551 | . | . | gene_id | "XLOC_139427"; | transcript_id | "Novel_001945"; | exon_number | "1"; | gene_type | " |
| Dt_chr10 | Cufflinks | exon | 30697642 | 30698196 | . | . | gene_id | "XLOC_139427"; | transcript_id | "Novel_001945"; | exon_number | "2"; | gene_type | " |
| Dt_chr10 | Cufflinks | exon | 32584948 | 32586232 | . | . | gene_id | "XLOC_139549"; | transcript_id | "Novel_001946"; | exon_number | "1"; | gene_type | " |
| Dt_chr10 | Cufflinks | exon | 32586327 | 32586560 | . | . | gene_id | "XLOC_139549"; | transcript_id | "Novel_001946"; | exon_number | "2"; | gene_type | " |
| Dt_chr10 | Cufflinks | exon | 32587372 | 32589054 | . | . | gene_id | "XLOC_139549"; | transcript_id | "Novel_001946"; | exon_number | "3"; | gene_type | " |
| Dt_chr10 | Cufflinks | exon | 32584958 | 32586560 | . | . | gene_id | "XLOC_139549"; | transcript_id | "Novel_001947"; | exon_number | "1"; | gene_type | " |
| Dt_chr10 | Cufflinks | exon | 32587372 | 32589036 | . | . | gene_id | "XLOC_139549"; | transcript_id | "Novel_001947"; | exon_number | "2"; | gene_type | " |
| Dt_chr10 | Cufflinks | exon | 32584970 | 32586560 | . | . | gene_id | "XLOC_139549"; | transcript_id | "Novel_001948"; | exon_number | "1"; | gene_type | " |
| Dt_chr10 | Cufflinks | exon | 32587372 | 32587542 | . | . | gene_id | "XLOC_139549"; | transcript_id | "Novel_001948"; | exon_number | "2"; | gene_type | " |
| Dt_chr10 | Cufflinks | exon | 32588420 | 32589060 | . | . | gene_id | "XLOC_139549"; | transcript_id | "Novel_001948"; | exon_number | "3"; | gene_type | " |
| Dt_chr10 | Cufflinks | exon | 43156625 | 43157354 | . | . | gene_id | "XLOC_140000"; | transcript_id | "Novel_001949"; | exon_number | "1"; | gene_type | " |
| Dt_chr10 | Cufflinks | exon | 43157723 | 43157843 | . | . | gene_id | "XLOC_140000"; | transcript_id | "Novel_001949"; | exon_number | "2"; | gene_type | " |
| Dt_chr10 | Cufflinks | exon | 43157965 | 43158067 | . | . | gene_id | "XLOC_140000"; | transcript_id | "Novel_001949"; | exon_number | "3"; | gene_type | " |
| Dt_chr10 | Cufflinks | exon | 43158306 | 43158493 | . | . | gene_id | "XLOC_140000"; | transcript_id | "Novel_001949"; | exon_number | "4"; | gene_type | " |
| Dt_chr10 | Cufflinks | exon | 43157059 | 43157843 | . | . | gene_id | "XLOC_140000"; | transcript_id | "Novel_001950"; | exon_number | "1"; | gene_type | " |
| Dt_chr10 | Cufflinks | exon | 43157965 | 43158067 | . | . | gene_id | "XLOC_140000"; | transcript_id | "Novel_001950"; | exon_number | "2"; | gene_type | " |
| Dt_chr10 | Cufflinks | exon | 43158306 | 43158493 | . | . | gene_id | "XLOC_140000"; | transcript_id | "Novel_001950"; | exon_number | "3"; | gene_type | " |
| Dt_chr10 | Cufflinks | exon | 44072032 | 44073455 | . | . | gene_id | "XLOC_140034"; | transcript_id | "Novel_001951"; | exon_number | "1"; | gene_type | " |

|          |           |      |          |          |   |   |   |         |                |               |                 |             |       |           |   |
|----------|-----------|------|----------|----------|---|---|---|---------|----------------|---------------|-----------------|-------------|-------|-----------|---|
| Dt_chr10 | Cufflinks | exon | 44075254 | 44075363 | . | - | . | gene_id | "XLOC_140034"; | transcript_id | "Novel_001951"; | exon_number | "2";  | gene_type | " |
| Dt_chr10 | Cufflinks | exon | 44075470 | 44075828 | . | - | . | gene_id | "XLOC_140034"; | transcript_id | "Novel_001951"; | exon_number | "3";  | gene_type | " |
| Dt_chr10 | Cufflinks | exon | 44076091 | 44076262 | . | - | . | gene_id | "XLOC_140034"; | transcript_id | "Novel_001951"; | exon_number | "4";  | gene_type | " |
| Dt_chr10 | Cufflinks | exon | 44076539 | 44076758 | . | - | . | gene_id | "XLOC_140034"; | transcript_id | "Novel_001951"; | exon_number | "5";  | gene_type | " |
| Dt_chr10 | Cufflinks | exon | 44072266 | 44073455 | . | - | . | gene_id | "XLOC_140034"; | transcript_id | "Novel_001952"; | exon_number | "1";  | gene_type | " |
| Dt_chr10 | Cufflinks | exon | 44075254 | 44075363 | . | - | . | gene_id | "XLOC_140034"; | transcript_id | "Novel_001952"; | exon_number | "2";  | gene_type | " |
| Dt_chr10 | Cufflinks | exon | 44075470 | 44076262 | . | - | . | gene_id | "XLOC_140034"; | transcript_id | "Novel_001952"; | exon_number | "3";  | gene_type | " |
| Dt_chr10 | Cufflinks | exon | 44076539 | 44076719 | . | - | . | gene_id | "XLOC_140034"; | transcript_id | "Novel_001952"; | exon_number | "4";  | gene_type | " |
| Dt_chr10 | Cufflinks | exon | 44072282 | 44073455 | . | - | . | gene_id | "XLOC_140034"; | transcript_id | "Novel_001953"; | exon_number | "1";  | gene_type | " |
| Dt_chr10 | Cufflinks | exon | 44075244 | 44075363 | . | - | . | gene_id | "XLOC_140034"; | transcript_id | "Novel_001953"; | exon_number | "2";  | gene_type | " |
| Dt_chr10 | Cufflinks | exon | 44075470 | 44075828 | . | - | . | gene_id | "XLOC_140034"; | transcript_id | "Novel_001953"; | exon_number | "3";  | gene_type | " |
| Dt_chr10 | Cufflinks | exon | 44076091 | 44076262 | . | - | . | gene_id | "XLOC_140034"; | transcript_id | "Novel_001953"; | exon_number | "4";  | gene_type | " |
| Dt_chr10 | Cufflinks | exon | 44076539 | 44076758 | . | - | . | gene_id | "XLOC_140034"; | transcript_id | "Novel_001953"; | exon_number | "5";  | gene_type | " |
| Dt_chr10 | Cufflinks | exon | 45360960 | 45362063 | . | - | . | gene_id | "XLOC_140144"; | transcript_id | "Novel_001954"; | exon_number | "1";  | gene_type | " |
| Dt_chr10 | Cufflinks | exon | 45362144 | 45365075 | . | - | . | gene_id | "XLOC_140144"; | transcript_id | "Novel_001954"; | exon_number | "2";  | gene_type | " |
| Dt_chr10 | Cufflinks | exon | 45362513 | 45363462 | . | - | . | gene_id | "XLOC_140144"; | transcript_id | "Novel_001955"; | exon_number | "1";  | gene_type | " |
| Dt_chr10 | Cufflinks | exon | 45364458 | 45365006 | . | - | . | gene_id | "XLOC_140144"; | transcript_id | "Novel_001955"; | exon_number | "2";  | gene_type | " |
| Dt_chr10 | Cufflinks | exon | 47013559 | 47014000 | . | - | . | gene_id | "XLOC_140329"; | transcript_id | "Novel_001956"; | exon_number | "1";  | gene_type | " |
| Dt_chr10 | Cufflinks | exon | 47014964 | 47015025 | . | - | . | gene_id | "XLOC_140329"; | transcript_id | "Novel_001956"; | exon_number | "2";  | gene_type | " |
| Dt_chr10 | Cufflinks | exon | 47017980 | 47018075 | . | - | . | gene_id | "XLOC_140329"; | transcript_id | "Novel_001956"; | exon_number | "3";  | gene_type | " |
| Dt_chr10 | Cufflinks | exon | 47013566 | 47014000 | . | - | . | gene_id | "XLOC_140329"; | transcript_id | "Novel_001957"; | exon_number | "1";  | gene_type | " |
| Dt_chr10 | Cufflinks | exon | 47014964 | 47015025 | . | - | . | gene_id | "XLOC_140329"; | transcript_id | "Novel_001957"; | exon_number | "2";  | gene_type | " |
| Dt_chr10 | Cufflinks | exon | 47015751 | 47015795 | . | - | . | gene_id | "XLOC_140329"; | transcript_id | "Novel_001957"; | exon_number | "3";  | gene_type | " |
| Dt_chr10 | Cufflinks | exon | 47017980 | 47018025 | . | - | . | gene_id | "XLOC_140329"; | transcript_id | "Novel_001957"; | exon_number | "4";  | gene_type | " |
| Dt_chr10 | Cufflinks | exon | 48618680 | 48618925 | . | - | . | gene_id | "XLOC_140411"; | transcript_id | "Novel_001958"; | exon_number | "1";  | gene_type | " |
| Dt_chr10 | Cufflinks | exon | 56066298 | 56066776 | . | - | . | gene_id | "XLOC_140817"; | transcript_id | "Novel_001959"; | exon_number | "1";  | gene_type | " |
| Dt_chr10 | Cufflinks | exon | 56067029 | 56067086 | . | - | . | gene_id | "XLOC_140817"; | transcript_id | "Novel_001959"; | exon_number | "2";  | gene_type | " |
| Dt_chr10 | Cufflinks | exon | 56068109 | 56068162 | . | - | . | gene_id | "XLOC_140817"; | transcript_id | "Novel_001959"; | exon_number | "3";  | gene_type | " |
| Dt_chr10 | Cufflinks | exon | 56069269 | 56069472 | . | - | . | gene_id | "XLOC_140817"; | transcript_id | "Novel_001959"; | exon_number | "4";  | gene_type | " |
| Dt_chr10 | Cufflinks | exon | 56070560 | 56070613 | . | - | . | gene_id | "XLOC_140817"; | transcript_id | "Novel_001959"; | exon_number | "5";  | gene_type | " |
| Dt_chr10 | Cufflinks | exon | 56070933 | 56071211 | . | - | . | gene_id | "XLOC_140817"; | transcript_id | "Novel_001959"; | exon_number | "6";  | gene_type | " |
| Dt_chr10 | Cufflinks | exon | 56071777 | 56071841 | . | - | . | gene_id | "XLOC_140817"; | transcript_id | "Novel_001959"; | exon_number | "7";  | gene_type | " |
| Dt_chr10 | Cufflinks | exon | 56071936 | 56072043 | . | - | . | gene_id | "XLOC_140817"; | transcript_id | "Novel_001959"; | exon_number | "8";  | gene_type | " |
| Dt_chr10 | Cufflinks | exon | 56072740 | 56072923 | . | - | . | gene_id | "XLOC_140817"; | transcript_id | "Novel_001959"; | exon_number | "9";  | gene_type | " |
| Dt_chr10 | Cufflinks | exon | 56073003 | 56073194 | . | - | . | gene_id | "XLOC_140817"; | transcript_id | "Novel_001959"; | exon_number | "10"; | gene_type | " |

|          |           |      |          |          |   |   |   |         |                |               |                 |             |       |           |   |
|----------|-----------|------|----------|----------|---|---|---|---------|----------------|---------------|-----------------|-------------|-------|-----------|---|
| Dt_chr10 | Cufflinks | exon | 56066368 | 56066776 | . | - | . | gene_id | "XLOC_140817"; | transcript_id | "Novel_001960"; | exon_number | "1";  | gene_type | " |
| Dt_chr10 | Cufflinks | exon | 56067029 | 56067086 | . | - | . | gene_id | "XLOC_140817"; | transcript_id | "Novel_001960"; | exon_number | "2";  | gene_type | " |
| Dt_chr10 | Cufflinks | exon | 56068109 | 56068162 | . | - | . | gene_id | "XLOC_140817"; | transcript_id | "Novel_001960"; | exon_number | "3";  | gene_type | " |
| Dt_chr10 | Cufflinks | exon | 56069269 | 56069472 | . | - | . | gene_id | "XLOC_140817"; | transcript_id | "Novel_001960"; | exon_number | "4";  | gene_type | " |
| Dt_chr10 | Cufflinks | exon | 56070560 | 56070613 | . | - | . | gene_id | "XLOC_140817"; | transcript_id | "Novel_001960"; | exon_number | "5";  | gene_type | " |
| Dt_chr10 | Cufflinks | exon | 56070933 | 56071211 | . | - | . | gene_id | "XLOC_140817"; | transcript_id | "Novel_001960"; | exon_number | "6";  | gene_type | " |
| Dt_chr10 | Cufflinks | exon | 56071777 | 56071841 | . | - | . | gene_id | "XLOC_140817"; | transcript_id | "Novel_001960"; | exon_number | "7";  | gene_type | " |
| Dt_chr10 | Cufflinks | exon | 56071936 | 56072043 | . | - | . | gene_id | "XLOC_140817"; | transcript_id | "Novel_001960"; | exon_number | "8";  | gene_type | " |
| Dt_chr10 | Cufflinks | exon | 56072740 | 56072923 | . | - | . | gene_id | "XLOC_140817"; | transcript_id | "Novel_001960"; | exon_number | "9";  | gene_type | " |
| Dt_chr10 | Cufflinks | exon | 56073003 | 56073127 | . | - | . | gene_id | "XLOC_140817"; | transcript_id | "Novel_001960"; | exon_number | "10"; | gene_type | " |
| Dt_chr10 | Cufflinks | exon | 56073282 | 56073406 | . | - | . | gene_id | "XLOC_140817"; | transcript_id | "Novel_001960"; | exon_number | "11"; | gene_type | " |
| Dt_chr10 | Cufflinks | exon | 56073504 | 56073969 | . | - | . | gene_id | "XLOC_140817"; | transcript_id | "Novel_001960"; | exon_number | "12"; | gene_type | " |
| Dt_chr10 | Cufflinks | exon | 56068838 | 56070613 | . | - | . | gene_id | "XLOC_140817"; | transcript_id | "Novel_001961"; | exon_number | "1";  | gene_type | " |
| Dt_chr10 | Cufflinks | exon | 56070933 | 56071211 | . | - | . | gene_id | "XLOC_140817"; | transcript_id | "Novel_001961"; | exon_number | "2";  | gene_type | " |
| Dt_chr10 | Cufflinks | exon | 56071777 | 56071841 | . | - | . | gene_id | "XLOC_140817"; | transcript_id | "Novel_001961"; | exon_number | "3";  | gene_type | " |
| Dt_chr10 | Cufflinks | exon | 56071936 | 56072043 | . | - | . | gene_id | "XLOC_140817"; | transcript_id | "Novel_001961"; | exon_number | "4";  | gene_type | " |
| Dt_chr10 | Cufflinks | exon | 56072512 | 56072579 | . | - | . | gene_id | "XLOC_140817"; | transcript_id | "Novel_001961"; | exon_number | "5";  | gene_type | " |
| Dt_chr10 | Cufflinks | exon | 56073366 | 56073406 | . | - | . | gene_id | "XLOC_140817"; | transcript_id | "Novel_001962"; | exon_number | "1";  | gene_type | " |
| Dt_chr10 | Cufflinks | exon | 56073504 | 56073926 | . | - | . | gene_id | "XLOC_140817"; | transcript_id | "Novel_001962"; | exon_number | "2";  | gene_type | " |
| Dt_chr10 | Cufflinks | exon | 56074453 | 56074708 | . | - | . | gene_id | "XLOC_140817"; | transcript_id | "Novel_001962"; | exon_number | "3";  | gene_type | " |
| Dt_chr11 | Cufflinks | exon | 507093   | 507219   | . | + | . | gene_id | "XLOC_141048"; | transcript_id | "Novel_001963"; | exon_number | "1";  | gene_type | " |
| Dt_chr11 | Cufflinks | exon | 507877   | 507968   | . | + | . | gene_id | "XLOC_141048"; | transcript_id | "Novel_001963"; | exon_number | "2";  | gene_type | " |
| Dt_chr11 | Cufflinks | exon | 508366   | 508577   | . | + | . | gene_id | "XLOC_141048"; | transcript_id | "Novel_001963"; | exon_number | "3";  | gene_type | " |
| Dt_chr11 | Cufflinks | exon | 1023279  | 1023580  | . | + | . | gene_id | "XLOC_141129"; | transcript_id | "Novel_001964"; | exon_number | "1";  | gene_type | " |
| Dt_chr11 | Cufflinks | exon | 1023773  | 1023849  | . | + | . | gene_id | "XLOC_141129"; | transcript_id | "Novel_001964"; | exon_number | "2";  | gene_type | " |
| Dt_chr11 | Cufflinks | exon | 1023968  | 1025238  | . | + | . | gene_id | "XLOC_141129"; | transcript_id | "Novel_001964"; | exon_number | "3";  | gene_type | " |
| Dt_chr11 | Cufflinks | exon | 1374141  | 1374442  | . | + | . | gene_id | "XLOC_141188"; | transcript_id | "Novel_001965"; | exon_number | "1";  | gene_type | " |
| Dt_chr11 | Cufflinks | exon | 1374822  | 1374962  | . | + | . | gene_id | "XLOC_141188"; | transcript_id | "Novel_001965"; | exon_number | "2";  | gene_type | " |
| Dt_chr11 | Cufflinks | exon | 1375077  | 1375140  | . | + | . | gene_id | "XLOC_141188"; | transcript_id | "Novel_001965"; | exon_number | "3";  | gene_type | " |
| Dt_chr11 | Cufflinks | exon | 1375731  | 1375833  | . | + | . | gene_id | "XLOC_141188"; | transcript_id | "Novel_001965"; | exon_number | "4";  | gene_type | " |
| Dt_chr11 | Cufflinks | exon | 1376116  | 1376437  | . | + | . | gene_id | "XLOC_141188"; | transcript_id | "Novel_001965"; | exon_number | "5";  | gene_type | " |
| Dt_chr11 | Cufflinks | exon | 1376543  | 1377024  | . | + | . | gene_id | "XLOC_141188"; | transcript_id | "Novel_001965"; | exon_number | "6";  | gene_type | " |
| Dt_chr11 | Cufflinks | exon | 1374141  | 1374442  | . | + | . | gene_id | "XLOC_141188"; | transcript_id | "Novel_001966"; | exon_number | "1";  | gene_type | " |
| Dt_chr11 | Cufflinks | exon | 1374822  | 1374962  | . | + | . | gene_id | "XLOC_141188"; | transcript_id | "Novel_001966"; | exon_number | "2";  | gene_type | " |
| Dt_chr11 | Cufflinks | exon | 1375077  | 1375140  | . | + | . | gene_id | "XLOC_141188"; | transcript_id | "Novel_001966"; | exon_number | "3";  | gene_type | " |

|          |           |      |          |          |   |   |   |         |                |               |                 |             |      |           |   |
|----------|-----------|------|----------|----------|---|---|---|---------|----------------|---------------|-----------------|-------------|------|-----------|---|
| Dt_chr11 | Cufflinks | exon | 1375731  | 1377024  | . | + | . | gene_id | "XLOC_141188"; | transcript_id | "Novel_001966"; | exon_number | "4"; | gene_type | " |
| Dt_chr11 | Cufflinks | exon | 1605275  | 1605374  | . | + | . | gene_id | "XLOC_141224"; | transcript_id | "Novel_001967"; | exon_number | "1"; | gene_type | " |
| Dt_chr11 | Cufflinks | exon | 1607038  | 1609206  | . | + | . | gene_id | "XLOC_141224"; | transcript_id | "Novel_001967"; | exon_number | "2"; | gene_type | " |
| Dt_chr11 | Cufflinks | exon | 3832417  | 3832533  | . | + | . | gene_id | "XLOC_141515"; | transcript_id | "Novel_001968"; | exon_number | "1"; | gene_type | " |
| Dt_chr11 | Cufflinks | exon | 3832636  | 3832801  | . | + | . | gene_id | "XLOC_141515"; | transcript_id | "Novel_001968"; | exon_number | "2"; | gene_type | " |
| Dt_chr11 | Cufflinks | exon | 5073217  | 5073289  | . | + | . | gene_id | "XLOC_141686"; | transcript_id | "Novel_001969"; | exon_number | "1"; | gene_type | " |
| Dt_chr11 | Cufflinks | exon | 5074450  | 5074636  | . | + | . | gene_id | "XLOC_141686"; | transcript_id | "Novel_001969"; | exon_number | "2"; | gene_type | " |
| Dt_chr11 | Cufflinks | exon | 5074730  | 5074895  | . | + | . | gene_id | "XLOC_141686"; | transcript_id | "Novel_001969"; | exon_number | "3"; | gene_type | " |
| Dt_chr11 | Cufflinks | exon | 5075004  | 5075041  | . | + | . | gene_id | "XLOC_141686"; | transcript_id | "Novel_001969"; | exon_number | "4"; | gene_type | " |
| Dt_chr11 | Cufflinks | exon | 5075133  | 5075184  | . | + | . | gene_id | "XLOC_141686"; | transcript_id | "Novel_001969"; | exon_number | "5"; | gene_type | " |
| Dt_chr11 | Cufflinks | exon | 5075299  | 5075887  | . | + | . | gene_id | "XLOC_141686"; | transcript_id | "Novel_001969"; | exon_number | "6"; | gene_type | " |
| Dt_chr11 | Cufflinks | exon | 6469987  | 6470144  | . | + | . | gene_id | "XLOC_141845"; | transcript_id | "Novel_001970"; | exon_number | "1"; | gene_type | " |
| Dt_chr11 | Cufflinks | exon | 6470384  | 6473208  | . | + | . | gene_id | "XLOC_141845"; | transcript_id | "Novel_001970"; | exon_number | "2"; | gene_type | " |
| Dt_chr11 | Cufflinks | exon | 8613111  | 8613732  | . | + | . | gene_id | "XLOC_142106"; | transcript_id | "Novel_001971"; | exon_number | "1"; | gene_type | " |
| Dt_chr11 | Cufflinks | exon | 8615070  | 8615121  | . | + | . | gene_id | "XLOC_142106"; | transcript_id | "Novel_001971"; | exon_number | "2"; | gene_type | " |
| Dt_chr11 | Cufflinks | exon | 8615615  | 8615695  | . | + | . | gene_id | "XLOC_142106"; | transcript_id | "Novel_001971"; | exon_number | "3"; | gene_type | " |
| Dt_chr11 | Cufflinks | exon | 8616095  | 8616213  | . | + | . | gene_id | "XLOC_142106"; | transcript_id | "Novel_001971"; | exon_number | "4"; | gene_type | " |
| Dt_chr11 | Cufflinks | exon | 8616519  | 8616738  | . | + | . | gene_id | "XLOC_142106"; | transcript_id | "Novel_001971"; | exon_number | "5"; | gene_type | " |
| Dt_chr11 | Cufflinks | exon | 8616848  | 8616966  | . | + | . | gene_id | "XLOC_142106"; | transcript_id | "Novel_001971"; | exon_number | "6"; | gene_type | " |
| Dt_chr11 | Cufflinks | exon | 8617088  | 8617963  | . | + | . | gene_id | "XLOC_142106"; | transcript_id | "Novel_001971"; | exon_number | "7"; | gene_type | " |
| Dt_chr11 | Cufflinks | exon | 11382356 | 11382437 | . | + | . | gene_id | "XLOC_142378"; | transcript_id | "Novel_001972"; | exon_number | "1"; | gene_type | " |
| Dt_chr11 | Cufflinks | exon | 11382535 | 11383041 | . | + | . | gene_id | "XLOC_142378"; | transcript_id | "Novel_001972"; | exon_number | "2"; | gene_type | " |
| Dt_chr11 | Cufflinks | exon | 12106025 | 12106373 | . | + | . | gene_id | "XLOC_142441"; | transcript_id | "Novel_001973"; | exon_number | "1"; | gene_type | " |
| Dt_chr11 | Cufflinks | exon | 12106787 | 12106941 | . | + | . | gene_id | "XLOC_142441"; | transcript_id | "Novel_001973"; | exon_number | "2"; | gene_type | " |
| Dt_chr11 | Cufflinks | exon | 12110137 | 12110780 | . | + | . | gene_id | "XLOC_142441"; | transcript_id | "Novel_001973"; | exon_number | "3"; | gene_type | " |
| Dt_chr11 | Cufflinks | exon | 12106025 | 12106373 | . | + | . | gene_id | "XLOC_142441"; | transcript_id | "Novel_001974"; | exon_number | "1"; | gene_type | " |
| Dt_chr11 | Cufflinks | exon | 12106455 | 12106537 | . | + | . | gene_id | "XLOC_142441"; | transcript_id | "Novel_001974"; | exon_number | "2"; | gene_type | " |
| Dt_chr11 | Cufflinks | exon | 12106787 | 12106941 | . | + | . | gene_id | "XLOC_142441"; | transcript_id | "Novel_001974"; | exon_number | "3"; | gene_type | " |
| Dt_chr11 | Cufflinks | exon | 12110137 | 12110780 | . | + | . | gene_id | "XLOC_142441"; | transcript_id | "Novel_001974"; | exon_number | "4"; | gene_type | " |
| Dt_chr11 | Cufflinks | exon | 16822018 | 16822243 | . | + | . | gene_id | "XLOC_142738"; | transcript_id | "Novel_001975"; | exon_number | "1"; | gene_type | " |
| Dt_chr11 | Cufflinks | exon | 16824779 | 16826129 | . | + | . | gene_id | "XLOC_142738"; | transcript_id | "Novel_001975"; | exon_number | "2"; | gene_type | " |
| Dt_chr11 | Cufflinks | exon | 19603284 | 19604047 | . | + | . | gene_id | "XLOC_142955"; | transcript_id | "Novel_001976"; | exon_number | "1"; | gene_type | " |
| Dt_chr11 | Cufflinks | exon | 19604212 | 19604389 | . | + | . | gene_id | "XLOC_142955"; | transcript_id | "Novel_001976"; | exon_number | "2"; | gene_type | " |
| Dt_chr11 | Cufflinks | exon | 19605722 | 19606191 | . | + | . | gene_id | "XLOC_142955"; | transcript_id | "Novel_001976"; | exon_number | "3"; | gene_type | " |
| Dt_chr11 | Cufflinks | exon | 19606632 | 19606771 | . | + | . | gene_id | "XLOC_142955"; | transcript_id | "Novel_001976"; | exon_number | "4"; | gene_type | " |

|          |           |      |          |          |   |   |   |         |                |               |                 |             |      |           |   |
|----------|-----------|------|----------|----------|---|---|---|---------|----------------|---------------|-----------------|-------------|------|-----------|---|
| Dt_chr11 | Cufflinks | exon | 19603284 | 19604047 | . | + | . | gene_id | "XLOC_142955"; | transcript_id | "Novel_001977"; | exon_number | "1"; | gene_type | " |
| Dt_chr11 | Cufflinks | exon | 19604212 | 19604389 | . | + | . | gene_id | "XLOC_142955"; | transcript_id | "Novel_001977"; | exon_number | "2"; | gene_type | " |
| Dt_chr11 | Cufflinks | exon | 19605722 | 19606191 | . | + | . | gene_id | "XLOC_142955"; | transcript_id | "Novel_001977"; | exon_number | "3"; | gene_type | " |
| Dt_chr11 | Cufflinks | exon | 19606632 | 19606760 | . | + | . | gene_id | "XLOC_142955"; | transcript_id | "Novel_001977"; | exon_number | "4"; | gene_type | " |
| Dt_chr11 | Cufflinks | exon | 19607170 | 19607809 | . | + | . | gene_id | "XLOC_142955"; | transcript_id | "Novel_001977"; | exon_number | "5"; | gene_type | " |
| Dt_chr11 | Cufflinks | exon | 19653547 | 19654886 | . | + | . | gene_id | "XLOC_142972"; | transcript_id | "Novel_001978"; | exon_number | "1"; | gene_type | " |
| Dt_chr11 | Cufflinks | exon | 19655561 | 19655702 | . | + | . | gene_id | "XLOC_142972"; | transcript_id | "Novel_001978"; | exon_number | "2"; | gene_type | " |
| Dt_chr11 | Cufflinks | exon | 19655799 | 19655845 | . | + | . | gene_id | "XLOC_142972"; | transcript_id | "Novel_001978"; | exon_number | "3"; | gene_type | " |
| Dt_chr11 | Cufflinks | exon | 19655969 | 19656894 | . | + | . | gene_id | "XLOC_142972"; | transcript_id | "Novel_001978"; | exon_number | "4"; | gene_type | " |
| Dt_chr11 | Cufflinks | exon | 19654792 | 19654886 | . | + | . | gene_id | "XLOC_142972"; | transcript_id | "Novel_001979"; | exon_number | "1"; | gene_type | " |
| Dt_chr11 | Cufflinks | exon | 19655561 | 19656444 | . | + | . | gene_id | "XLOC_142972"; | transcript_id | "Novel_001979"; | exon_number | "2"; | gene_type | " |
| Dt_chr11 | Cufflinks | exon | 19654935 | 19655702 | . | + | . | gene_id | "XLOC_142972"; | transcript_id | "Novel_001980"; | exon_number | "1"; | gene_type | " |
| Dt_chr11 | Cufflinks | exon | 19655799 | 19655827 | . | + | . | gene_id | "XLOC_142972"; | transcript_id | "Novel_001980"; | exon_number | "2"; | gene_type | " |
| Dt_chr11 | Cufflinks | exon | 26468722 | 26468922 | . | + | . | gene_id | "XLOC_143594"; | transcript_id | "Novel_001981"; | exon_number | "1"; | gene_type | " |
| Dt_chr11 | Cufflinks | exon | 26469085 | 26469368 | . | + | . | gene_id | "XLOC_143594"; | transcript_id | "Novel_001981"; | exon_number | "2"; | gene_type | " |
| Dt_chr11 | Cufflinks | exon | 26470404 | 26472534 | . | + | . | gene_id | "XLOC_143594"; | transcript_id | "Novel_001981"; | exon_number | "3"; | gene_type | " |
| Dt_chr11 | Cufflinks | exon | 26468742 | 26469368 | . | + | . | gene_id | "XLOC_143594"; | transcript_id | "Novel_001982"; | exon_number | "1"; | gene_type | " |
| Dt_chr11 | Cufflinks | exon | 26470404 | 26472531 | . | + | . | gene_id | "XLOC_143594"; | transcript_id | "Novel_001982"; | exon_number | "2"; | gene_type | " |
| Dt_chr11 | Cufflinks | exon | 28185663 | 28185830 | . | + | . | gene_id | "XLOC_143693"; | transcript_id | "Novel_001983"; | exon_number | "1"; | gene_type | " |
| Dt_chr11 | Cufflinks | exon | 28186596 | 28186867 | . | + | . | gene_id | "XLOC_143693"; | transcript_id | "Novel_001983"; | exon_number | "2"; | gene_type | " |
| Dt_chr11 | Cufflinks | exon | 30289178 | 30289782 | . | + | . | gene_id | "XLOC_143846"; | transcript_id | "Novel_001984"; | exon_number | "1"; | gene_type | " |
| Dt_chr11 | Cufflinks | exon | 30291209 | 30293468 | . | + | . | gene_id | "XLOC_143846"; | transcript_id | "Novel_001984"; | exon_number | "2"; | gene_type | " |
| Dt_chr11 | Cufflinks | exon | 30289325 | 30289782 | . | + | . | gene_id | "XLOC_143846"; | transcript_id | "Novel_001985"; | exon_number | "1"; | gene_type | " |
| Dt_chr11 | Cufflinks | exon | 30291209 | 30291256 | . | + | . | gene_id | "XLOC_143846"; | transcript_id | "Novel_001985"; | exon_number | "2"; | gene_type | " |
| Dt_chr11 | Cufflinks | exon | 30291427 | 30293536 | . | + | . | gene_id | "XLOC_143846"; | transcript_id | "Novel_001985"; | exon_number | "3"; | gene_type | " |
| Dt_chr11 | Cufflinks | exon | 31515761 | 31516157 | . | + | . | gene_id | "XLOC_143903"; | transcript_id | "Novel_001986"; | exon_number | "1"; | gene_type | " |
| Dt_chr11 | Cufflinks | exon | 31516233 | 31516554 | . | + | . | gene_id | "XLOC_143903"; | transcript_id | "Novel_001986"; | exon_number | "2"; | gene_type | " |
| Dt_chr11 | Cufflinks | exon | 31517772 | 31518371 | . | + | . | gene_id | "XLOC_143903"; | transcript_id | "Novel_001987"; | exon_number | "1"; | gene_type | " |
| Dt_chr11 | Cufflinks | exon | 31518458 | 31518498 | . | + | . | gene_id | "XLOC_143903"; | transcript_id | "Novel_001987"; | exon_number | "2"; | gene_type | " |
| Dt_chr11 | Cufflinks | exon | 31518611 | 31518712 | . | + | . | gene_id | "XLOC_143903"; | transcript_id | "Novel_001988"; | exon_number | "1"; | gene_type | " |
| Dt_chr11 | Cufflinks | exon | 31518826 | 31518937 | . | + | . | gene_id | "XLOC_143903"; | transcript_id | "Novel_001988"; | exon_number | "2"; | gene_type | " |
| Dt_chr11 | Cufflinks | exon | 31518619 | 31519412 | . | + | . | gene_id | "XLOC_143903"; | transcript_id | "Novel_001989"; | exon_number | "1"; | gene_type | " |
| Dt_chr11 | Cufflinks | exon | 31520004 | 31520593 | . | + | . | gene_id | "XLOC_143903"; | transcript_id | "Novel_001989"; | exon_number | "2"; | gene_type | " |
| Dt_chr11 | Cufflinks | exon | 31555839 | 31555949 | . | + | . | gene_id | "XLOC_143905"; | transcript_id | "Novel_001990"; | exon_number | "1"; | gene_type | " |
| Dt_chr11 | Cufflinks | exon | 31556171 | 31556329 | . | + | . | gene_id | "XLOC_143905"; | transcript_id | "Novel_001990"; | exon_number | "2"; | gene_type | " |





|          |           |      |          |          |   |   |   |         |                |               |                 |             |      |           |   |
|----------|-----------|------|----------|----------|---|---|---|---------|----------------|---------------|-----------------|-------------|------|-----------|---|
| Dt_chr11 | Cufflinks | exon | 42734878 | 42734933 | . | + | . | gene_id | "XLOC_144432"; | transcript_id | "Novel_002001"; | exon_number | "2"; | gene_type | " |
| Dt_chr11 | Cufflinks | exon | 42735015 | 42735895 | . | + | . | gene_id | "XLOC_144432"; | transcript_id | "Novel_002001"; | exon_number | "3"; | gene_type | " |
| Dt_chr11 | Cufflinks | exon | 43167137 | 43167643 | . | + | . | gene_id | "XLOC_144453"; | transcript_id | "Novel_002002"; | exon_number | "1"; | gene_type | " |
| Dt_chr11 | Cufflinks | exon | 43167791 | 43167904 | . | + | . | gene_id | "XLOC_144453"; | transcript_id | "Novel_002002"; | exon_number | "2"; | gene_type | " |
| Dt_chr11 | Cufflinks | exon | 43169461 | 43169500 | . | + | . | gene_id | "XLOC_144453"; | transcript_id | "Novel_002003"; | exon_number | "1"; | gene_type | " |
| Dt_chr11 | Cufflinks | exon | 43169621 | 43169698 | . | + | . | gene_id | "XLOC_144453"; | transcript_id | "Novel_002003"; | exon_number | "2"; | gene_type | " |
| Dt_chr11 | Cufflinks | exon | 43170152 | 43170268 | . | + | . | gene_id | "XLOC_144453"; | transcript_id | "Novel_002003"; | exon_number | "3"; | gene_type | " |
| Dt_chr11 | Cufflinks | exon | 43170521 | 43170916 | . | + | . | gene_id | "XLOC_144453"; | transcript_id | "Novel_002003"; | exon_number | "4"; | gene_type | " |
| Dt_chr11 | Cufflinks | exon | 43169668 | 43169698 | . | + | . | gene_id | "XLOC_144453"; | transcript_id | "Novel_002004"; | exon_number | "1"; | gene_type | " |
| Dt_chr11 | Cufflinks | exon | 43170104 | 43170268 | . | + | . | gene_id | "XLOC_144453"; | transcript_id | "Novel_002004"; | exon_number | "2"; | gene_type | " |
| Dt_chr11 | Cufflinks | exon | 43170521 | 43170923 | . | + | . | gene_id | "XLOC_144453"; | transcript_id | "Novel_002004"; | exon_number | "3"; | gene_type | " |
| Dt_chr11 | Cufflinks | exon | 43369111 | 43369223 | . | + | . | gene_id | "XLOC_144458"; | transcript_id | "Novel_002005"; | exon_number | "1"; | gene_type | " |
| Dt_chr11 | Cufflinks | exon | 43369300 | 43369648 | . | + | . | gene_id | "XLOC_144458"; | transcript_id | "Novel_002005"; | exon_number | "2"; | gene_type | " |
| Dt_chr11 | Cufflinks | exon | 43370887 | 43370943 | . | + | . | gene_id | "XLOC_144458"; | transcript_id | "Novel_002005"; | exon_number | "3"; | gene_type | " |
| Dt_chr11 | Cufflinks | exon | 43371198 | 43372729 | . | + | . | gene_id | "XLOC_144458"; | transcript_id | "Novel_002005"; | exon_number | "4"; | gene_type | " |
| Dt_chr11 | Cufflinks | exon | 43372850 | 43372978 | . | + | . | gene_id | "XLOC_144458"; | transcript_id | "Novel_002005"; | exon_number | "5"; | gene_type | " |
| Dt_chr11 | Cufflinks | exon | 43373134 | 43373313 | . | + | . | gene_id | "XLOC_144458"; | transcript_id | "Novel_002005"; | exon_number | "6"; | gene_type | " |
| Dt_chr11 | Cufflinks | exon | 43373578 | 43373705 | . | + | . | gene_id | "XLOC_144458"; | transcript_id | "Novel_002005"; | exon_number | "7"; | gene_type | " |
| Dt_chr11 | Cufflinks | exon | 43374965 | 43374996 | . | + | . | gene_id | "XLOC_144458"; | transcript_id | "Novel_002006"; | exon_number | "1"; | gene_type | " |
| Dt_chr11 | Cufflinks | exon | 43375217 | 43375346 | . | + | . | gene_id | "XLOC_144458"; | transcript_id | "Novel_002006"; | exon_number | "2"; | gene_type | " |
| Dt_chr11 | Cufflinks | exon | 43375443 | 43375571 | . | + | . | gene_id | "XLOC_144458"; | transcript_id | "Novel_002006"; | exon_number | "3"; | gene_type | " |
| Dt_chr11 | Cufflinks | exon | 43375664 | 43375801 | . | + | . | gene_id | "XLOC_144458"; | transcript_id | "Novel_002006"; | exon_number | "4"; | gene_type | " |
| Dt_chr11 | Cufflinks | exon | 43375905 | 43375982 | . | + | . | gene_id | "XLOC_144458"; | transcript_id | "Novel_002006"; | exon_number | "5"; | gene_type | " |
| Dt_chr11 | Cufflinks | exon | 43376093 | 43376184 | . | + | . | gene_id | "XLOC_144458"; | transcript_id | "Novel_002006"; | exon_number | "6"; | gene_type | " |
| Dt_chr11 | Cufflinks | exon | 43376441 | 43376827 | . | + | . | gene_id | "XLOC_144458"; | transcript_id | "Novel_002006"; | exon_number | "7"; | gene_type | " |
| Dt_chr11 | Cufflinks | exon | 44535942 | 44536148 | . | + | . | gene_id | "XLOC_144542"; | transcript_id | "Novel_002007"; | exon_number | "1"; | gene_type | " |
| Dt_chr11 | Cufflinks | exon | 44536446 | 44537520 | . | + | . | gene_id | "XLOC_144542"; | transcript_id | "Novel_002007"; | exon_number | "2"; | gene_type | " |
| Dt_chr11 | Cufflinks | exon | 45572035 | 45573501 | . | + | . | gene_id | "XLOC_144613"; | transcript_id | "Novel_002008"; | exon_number | "1"; | gene_type | " |
| Dt_chr11 | Cufflinks | exon | 45573711 | 45574413 | . | + | . | gene_id | "XLOC_144613"; | transcript_id | "Novel_002008"; | exon_number | "2"; | gene_type | " |
| Dt_chr11 | Cufflinks | exon | 46997714 | 46997832 | . | + | . | gene_id | "XLOC_144730"; | transcript_id | "Novel_002009"; | exon_number | "1"; | gene_type | " |
| Dt_chr11 | Cufflinks | exon | 46997926 | 46998019 | . | + | . | gene_id | "XLOC_144730"; | transcript_id | "Novel_002009"; | exon_number | "2"; | gene_type | " |
| Dt_chr11 | Cufflinks | exon | 46999381 | 46999514 | . | + | . | gene_id | "XLOC_144730"; | transcript_id | "Novel_002009"; | exon_number | "3"; | gene_type | " |
| Dt_chr11 | Cufflinks | exon | 46999609 | 47000270 | . | + | . | gene_id | "XLOC_144730"; | transcript_id | "Novel_002009"; | exon_number | "4"; | gene_type | " |
| Dt_chr11 | Cufflinks | exon | 48010591 | 48010640 | . | + | . | gene_id | "XLOC_144864"; | transcript_id | "Novel_002010"; | exon_number | "1"; | gene_type | " |
| Dt_chr11 | Cufflinks | exon | 48010724 | 48011372 | . | + | . | gene_id | "XLOC_144864"; | transcript_id | "Novel_002010"; | exon_number | "2"; | gene_type | " |

|          |           |      |          |          |   |   |   |         |                |               |                 |             |      |           |   |
|----------|-----------|------|----------|----------|---|---|---|---------|----------------|---------------|-----------------|-------------|------|-----------|---|
| Dt_chr11 | Cufflinks | exon | 51042633 | 51043043 | . | + | . | gene_id | "XLOC_145108"; | transcript_id | "Novel_002011"; | exon_number | "1"; | gene_type | " |
| Dt_chr11 | Cufflinks | exon | 51043154 | 51043291 | . | + | . | gene_id | "XLOC_145108"; | transcript_id | "Novel_002011"; | exon_number | "2"; | gene_type | " |
| Dt_chr11 | Cufflinks | exon | 51043367 | 51044382 | . | + | . | gene_id | "XLOC_145108"; | transcript_id | "Novel_002011"; | exon_number | "3"; | gene_type | " |
| Dt_chr11 | Cufflinks | exon | 51042641 | 51043043 | . | + | . | gene_id | "XLOC_145108"; | transcript_id | "Novel_002012"; | exon_number | "1"; | gene_type | " |
| Dt_chr11 | Cufflinks | exon | 51043154 | 51043291 | . | + | . | gene_id | "XLOC_145108"; | transcript_id | "Novel_002012"; | exon_number | "2"; | gene_type | " |
| Dt_chr11 | Cufflinks | exon | 51043367 | 51043424 | . | + | . | gene_id | "XLOC_145108"; | transcript_id | "Novel_002012"; | exon_number | "3"; | gene_type | " |
| Dt_chr11 | Cufflinks | exon | 51043570 | 51043832 | . | + | . | gene_id | "XLOC_145108"; | transcript_id | "Novel_002012"; | exon_number | "4"; | gene_type | " |
| Dt_chr11 | Cufflinks | exon | 51043914 | 51044780 | . | + | . | gene_id | "XLOC_145108"; | transcript_id | "Novel_002012"; | exon_number | "5"; | gene_type | " |
| Dt_chr11 | Cufflinks | exon | 54643871 | 54643989 | . | + | . | gene_id | "XLOC_145357"; | transcript_id | "Novel_002013"; | exon_number | "1"; | gene_type | " |
| Dt_chr11 | Cufflinks | exon | 54644369 | 54644795 | . | + | . | gene_id | "XLOC_145357"; | transcript_id | "Novel_002013"; | exon_number | "2"; | gene_type | " |
| Dt_chr11 | Cufflinks | exon | 54644893 | 54646466 | . | + | . | gene_id | "XLOC_145357"; | transcript_id | "Novel_002013"; | exon_number | "3"; | gene_type | " |
| Dt_chr11 | Cufflinks | exon | 54646677 | 54646777 | . | + | . | gene_id | "XLOC_145357"; | transcript_id | "Novel_002013"; | exon_number | "4"; | gene_type | " |
| Dt_chr11 | Cufflinks | exon | 54646940 | 54647473 | . | + | . | gene_id | "XLOC_145357"; | transcript_id | "Novel_002013"; | exon_number | "5"; | gene_type | " |
| Dt_chr11 | Cufflinks | exon | 54647596 | 54647645 | . | + | . | gene_id | "XLOC_145357"; | transcript_id | "Novel_002013"; | exon_number | "6"; | gene_type | " |
| Dt_chr11 | Cufflinks | exon | 54647767 | 54647848 | . | + | . | gene_id | "XLOC_145357"; | transcript_id | "Novel_002013"; | exon_number | "7"; | gene_type | " |
| Dt_chr11 | Cufflinks | exon | 54648020 | 54648114 | . | + | . | gene_id | "XLOC_145357"; | transcript_id | "Novel_002013"; | exon_number | "8"; | gene_type | " |
| Dt_chr11 | Cufflinks | exon | 54648557 | 54649440 | . | + | . | gene_id | "XLOC_145357"; | transcript_id | "Novel_002013"; | exon_number | "9"; | gene_type | " |
| Dt_chr11 | Cufflinks | exon | 54748398 | 54748535 | . | + | . | gene_id | "XLOC_145366"; | transcript_id | "Novel_002014"; | exon_number | "1"; | gene_type | " |
| Dt_chr11 | Cufflinks | exon | 54748659 | 54749240 | . | + | . | gene_id | "XLOC_145366"; | transcript_id | "Novel_002014"; | exon_number | "2"; | gene_type | " |
| Dt_chr11 | Cufflinks | exon | 54749854 | 54749933 | . | + | . | gene_id | "XLOC_145366"; | transcript_id | "Novel_002014"; | exon_number | "3"; | gene_type | " |
| Dt_chr11 | Cufflinks | exon | 54750035 | 54750341 | . | + | . | gene_id | "XLOC_145366"; | transcript_id | "Novel_002014"; | exon_number | "4"; | gene_type | " |
| Dt_chr11 | Cufflinks | exon | 56362463 | 56362754 | . | + | . | gene_id | "XLOC_145439"; | transcript_id | "Novel_002015"; | exon_number | "1"; | gene_type | " |
| Dt_chr11 | Cufflinks | exon | 56363362 | 56364620 | . | + | . | gene_id | "XLOC_145439"; | transcript_id | "Novel_002015"; | exon_number | "2"; | gene_type | " |
| Dt_chr11 | Cufflinks | exon | 56362491 | 56363126 | . | + | . | gene_id | "XLOC_145439"; | transcript_id | "Novel_002016"; | exon_number | "1"; | gene_type | " |
| Dt_chr11 | Cufflinks | exon | 56363362 | 56363498 | . | + | . | gene_id | "XLOC_145439"; | transcript_id | "Novel_002016"; | exon_number | "2"; | gene_type | " |
| Dt_chr11 | Cufflinks | exon | 56363789 | 56365174 | . | + | . | gene_id | "XLOC_145439"; | transcript_id | "Novel_002016"; | exon_number | "3"; | gene_type | " |
| Dt_chr11 | Cufflinks | exon | 56638740 | 56638852 | . | + | . | gene_id | "XLOC_145462"; | transcript_id | "Novel_002017"; | exon_number | "1"; | gene_type | " |
| Dt_chr11 | Cufflinks | exon | 56638953 | 56639089 | . | + | . | gene_id | "XLOC_145462"; | transcript_id | "Novel_002017"; | exon_number | "2"; | gene_type | " |
| Dt_chr11 | Cufflinks | exon | 58139709 | 58139794 | . | + | . | gene_id | "XLOC_145631"; | transcript_id | "Novel_002018"; | exon_number | "1"; | gene_type | " |
| Dt_chr11 | Cufflinks | exon | 58139959 | 58140022 | . | + | . | gene_id | "XLOC_145631"; | transcript_id | "Novel_002018"; | exon_number | "2"; | gene_type | " |
| Dt_chr11 | Cufflinks | exon | 58140115 | 58140370 | . | + | . | gene_id | "XLOC_145631"; | transcript_id | "Novel_002018"; | exon_number | "3"; | gene_type | " |
| Dt_chr11 | Cufflinks | exon | 60553991 | 60554075 | . | + | . | gene_id | "XLOC_145838"; | transcript_id | "Novel_002019"; | exon_number | "1"; | gene_type | " |
| Dt_chr11 | Cufflinks | exon | 60554471 | 60554510 | . | + | . | gene_id | "XLOC_145838"; | transcript_id | "Novel_002019"; | exon_number | "2"; | gene_type | " |
| Dt_chr11 | Cufflinks | exon | 60554620 | 60554774 | . | + | . | gene_id | "XLOC_145838"; | transcript_id | "Novel_002019"; | exon_number | "3"; | gene_type | " |
| Dt_chr11 | Cufflinks | exon | 60554856 | 60554932 | . | + | . | gene_id | "XLOC_145838"; | transcript_id | "Novel_002019"; | exon_number | "4"; | gene_type | " |

|          |           |      |          |          |   |   |   |         |                |               |                 |             |      |           |   |
|----------|-----------|------|----------|----------|---|---|---|---------|----------------|---------------|-----------------|-------------|------|-----------|---|
| Dt_chr11 | Cufflinks | exon | 60556127 | 60556392 | . | + | . | gene_id | "XLOC_145839"; | transcript_id | "Novel_002020"; | exon_number | "1"; | gene_type | " |
| Dt_chr11 | Cufflinks | exon | 60556547 | 60556647 | . | + | . | gene_id | "XLOC_145839"; | transcript_id | "Novel_002020"; | exon_number | "2"; | gene_type | " |
| Dt_chr11 | Cufflinks | exon | 60556773 | 60556877 | . | + | . | gene_id | "XLOC_145839"; | transcript_id | "Novel_002020"; | exon_number | "3"; | gene_type | " |
| Dt_chr11 | Cufflinks | exon | 60557028 | 60557360 | . | + | . | gene_id | "XLOC_145839"; | transcript_id | "Novel_002020"; | exon_number | "4"; | gene_type | " |
| Dt_chr11 | Cufflinks | exon | 60556367 | 60556647 | . | + | . | gene_id | "XLOC_145839"; | transcript_id | "Novel_002021"; | exon_number | "1"; | gene_type | " |
| Dt_chr11 | Cufflinks | exon | 60556773 | 60556877 | . | + | . | gene_id | "XLOC_145839"; | transcript_id | "Novel_002021"; | exon_number | "2"; | gene_type | " |
| Dt_chr11 | Cufflinks | exon | 60557028 | 60557360 | . | + | . | gene_id | "XLOC_145839"; | transcript_id | "Novel_002021"; | exon_number | "3"; | gene_type | " |
| Dt_chr11 | Cufflinks | exon | 61000006 | 61001089 | . | + | . | gene_id | "XLOC_145906"; | transcript_id | "Novel_002022"; | exon_number | "1"; | gene_type | " |
| Dt_chr11 | Cufflinks | exon | 1195813  | 1195954  | . | - | . | gene_id | "XLOC_146115"; | transcript_id | "Novel_002023"; | exon_number | "1"; | gene_type | " |
| Dt_chr11 | Cufflinks | exon | 1196095  | 1196178  | . | - | . | gene_id | "XLOC_146115"; | transcript_id | "Novel_002023"; | exon_number | "2"; | gene_type | " |
| Dt_chr11 | Cufflinks | exon | 1197358  | 1197407  | . | - | . | gene_id | "XLOC_146115"; | transcript_id | "Novel_002023"; | exon_number | "3"; | gene_type | " |
| Dt_chr11 | Cufflinks | exon | 1199532  | 1199616  | . | - | . | gene_id | "XLOC_146115"; | transcript_id | "Novel_002023"; | exon_number | "4"; | gene_type | " |
| Dt_chr11 | Cufflinks | exon | 1195927  | 1195954  | . | - | . | gene_id | "XLOC_146115"; | transcript_id | "Novel_002024"; | exon_number | "1"; | gene_type | " |
| Dt_chr11 | Cufflinks | exon | 1196095  | 1196178  | . | - | . | gene_id | "XLOC_146115"; | transcript_id | "Novel_002024"; | exon_number | "2"; | gene_type | " |
| Dt_chr11 | Cufflinks | exon | 1197358  | 1197647  | . | - | . | gene_id | "XLOC_146115"; | transcript_id | "Novel_002024"; | exon_number | "3"; | gene_type | " |
| Dt_chr11 | Cufflinks | exon | 3065122  | 3065957  | . | - | . | gene_id | "XLOC_146337"; | transcript_id | "Novel_002025"; | exon_number | "1"; | gene_type | " |
| Dt_chr11 | Cufflinks | exon | 3067501  | 3067860  | . | - | . | gene_id | "XLOC_146337"; | transcript_id | "Novel_002025"; | exon_number | "2"; | gene_type | " |
| Dt_chr11 | Cufflinks | exon | 3385095  | 3386269  | . | - | . | gene_id | "XLOC_146392"; | transcript_id | "Novel_002026"; | exon_number | "1"; | gene_type | " |
| Dt_chr11 | Cufflinks | exon | 3386417  | 3386683  | . | - | . | gene_id | "XLOC_146392"; | transcript_id | "Novel_002026"; | exon_number | "2"; | gene_type | " |
| Dt_chr11 | Cufflinks | exon | 3385276  | 3385735  | . | - | . | gene_id | "XLOC_146392"; | transcript_id | "Novel_002027"; | exon_number | "1"; | gene_type | " |
| Dt_chr11 | Cufflinks | exon | 3386047  | 3386689  | . | - | . | gene_id | "XLOC_146392"; | transcript_id | "Novel_002027"; | exon_number | "2"; | gene_type | " |
| Dt_chr11 | Cufflinks | exon | 5624526  | 5625086  | . | - | . | gene_id | "XLOC_146715"; | transcript_id | "Novel_002028"; | exon_number | "1"; | gene_type | " |
| Dt_chr11 | Cufflinks | exon | 5625456  | 5627647  | . | - | . | gene_id | "XLOC_146715"; | transcript_id | "Novel_002028"; | exon_number | "2"; | gene_type | " |
| Dt_chr11 | Cufflinks | exon | 5629056  | 5629143  | . | - | . | gene_id | "XLOC_146715"; | transcript_id | "Novel_002028"; | exon_number | "3"; | gene_type | " |
| Dt_chr11 | Cufflinks | exon | 6152061  | 6152527  | . | - | . | gene_id | "XLOC_146806"; | transcript_id | "Novel_002029"; | exon_number | "1"; | gene_type | " |
| Dt_chr11 | Cufflinks | exon | 6153269  | 6154121  | . | - | . | gene_id | "XLOC_146806"; | transcript_id | "Novel_002029"; | exon_number | "2"; | gene_type | " |
| Dt_chr11 | Cufflinks | exon | 7365505  | 7368300  | . | - | . | gene_id | "XLOC_146952"; | transcript_id | "Novel_002030"; | exon_number | "1"; | gene_type | " |
| Dt_chr11 | Cufflinks | exon | 7368393  | 7368449  | . | - | . | gene_id | "XLOC_146952"; | transcript_id | "Novel_002030"; | exon_number | "2"; | gene_type | " |
| Dt_chr11 | Cufflinks | exon | 7368529  | 7368741  | . | - | . | gene_id | "XLOC_146952"; | transcript_id | "Novel_002030"; | exon_number | "3"; | gene_type | " |
| Dt_chr11 | Cufflinks | exon | 7365505  | 7368449  | . | - | . | gene_id | "XLOC_146952"; | transcript_id | "Novel_002031"; | exon_number | "1"; | gene_type | " |
| Dt_chr11 | Cufflinks | exon | 7368529  | 7368741  | . | - | . | gene_id | "XLOC_146952"; | transcript_id | "Novel_002031"; | exon_number | "2"; | gene_type | " |
| Dt_chr11 | Cufflinks | exon | 7365545  | 7367621  | . | - | . | gene_id | "XLOC_146952"; | transcript_id | "Novel_002032"; | exon_number | "1"; | gene_type | " |
| Dt_chr11 | Cufflinks | exon | 7367815  | 7367907  | . | - | . | gene_id | "XLOC_146952"; | transcript_id | "Novel_002032"; | exon_number | "2"; | gene_type | " |
| Dt_chr11 | Cufflinks | exon | 7368009  | 7368740  | . | - | . | gene_id | "XLOC_146952"; | transcript_id | "Novel_002032"; | exon_number | "3"; | gene_type | " |
| Dt_chr11 | Cufflinks | exon | 7365545  | 7367621  | . | - | . | gene_id | "XLOC_146952"; | transcript_id | "Novel_002033"; | exon_number | "1"; | gene_type | " |

|          |           |      |          |          |   |   |         |                |               |                 |             |      |           |   |
|----------|-----------|------|----------|----------|---|---|---------|----------------|---------------|-----------------|-------------|------|-----------|---|
| Dt_chr11 | Cufflinks | exon | 7367815  | 7368300  | . | . | gene_id | "XLOC_146952"; | transcript_id | "Novel_002033"; | exon_number | "2"; | gene_type | " |
| Dt_chr11 | Cufflinks | exon | 7368393  | 7368449  | . | . | gene_id | "XLOC_146952"; | transcript_id | "Novel_002033"; | exon_number | "3"; | gene_type | " |
| Dt_chr11 | Cufflinks | exon | 7368529  | 7368740  | . | . | gene_id | "XLOC_146952"; | transcript_id | "Novel_002033"; | exon_number | "4"; | gene_type | " |
| Dt_chr11 | Cufflinks | exon | 7366717  | 7366841  | . | . | gene_id | "XLOC_146952"; | transcript_id | "Novel_002034"; | exon_number | "1"; | gene_type | " |
| Dt_chr11 | Cufflinks | exon | 7367578  | 7367621  | . | . | gene_id | "XLOC_146952"; | transcript_id | "Novel_002034"; | exon_number | "2"; | gene_type | " |
| Dt_chr11 | Cufflinks | exon | 7367815  | 7367907  | . | . | gene_id | "XLOC_146952"; | transcript_id | "Novel_002034"; | exon_number | "3"; | gene_type | " |
| Dt_chr11 | Cufflinks | exon | 7367979  | 7368741  | . | . | gene_id | "XLOC_146952"; | transcript_id | "Novel_002034"; | exon_number | "4"; | gene_type | " |
| Dt_chr11 | Cufflinks | exon | 7476798  | 7477230  | . | . | gene_id | "XLOC_146960"; | transcript_id | "Novel_002035"; | exon_number | "1"; | gene_type | " |
| Dt_chr11 | Cufflinks | exon | 7477510  | 7477658  | . | . | gene_id | "XLOC_146960"; | transcript_id | "Novel_002035"; | exon_number | "2"; | gene_type | " |
| Dt_chr11 | Cufflinks | exon | 7491813  | 7492525  | . | . | gene_id | "XLOC_146961"; | transcript_id | "Novel_002036"; | exon_number | "1"; | gene_type | " |
| Dt_chr11 | Cufflinks | exon | 7492598  | 7492632  | . | . | gene_id | "XLOC_146961"; | transcript_id | "Novel_002036"; | exon_number | "2"; | gene_type | " |
| Dt_chr11 | Cufflinks | exon | 7492946  | 7493048  | . | . | gene_id | "XLOC_146961"; | transcript_id | "Novel_002036"; | exon_number | "3"; | gene_type | " |
| Dt_chr11 | Cufflinks | exon | 7493289  | 7493367  | . | . | gene_id | "XLOC_146961"; | transcript_id | "Novel_002036"; | exon_number | "4"; | gene_type | " |
| Dt_chr11 | Cufflinks | exon | 7958722  | 7960642  | . | . | gene_id | "XLOC_147002"; | transcript_id | "Novel_002037"; | exon_number | "1"; | gene_type | " |
| Dt_chr11 | Cufflinks | exon | 7960714  | 7960882  | . | . | gene_id | "XLOC_147002"; | transcript_id | "Novel_002037"; | exon_number | "2"; | gene_type | " |
| Dt_chr11 | Cufflinks | exon | 10786221 | 10789410 | . | . | gene_id | "XLOC_147254"; | transcript_id | "Novel_002038"; | exon_number | "1"; | gene_type | " |
| Dt_chr11 | Cufflinks | exon | 10789651 | 10791749 | . | . | gene_id | "XLOC_147254"; | transcript_id | "Novel_002038"; | exon_number | "2"; | gene_type | " |
| Dt_chr11 | Cufflinks | exon | 10786364 | 10790241 | . | . | gene_id | "XLOC_147254"; | transcript_id | "Novel_002039"; | exon_number | "1"; | gene_type | " |
| Dt_chr11 | Cufflinks | exon | 10790321 | 10791688 | . | . | gene_id | "XLOC_147254"; | transcript_id | "Novel_002039"; | exon_number | "2"; | gene_type | " |
| Dt_chr11 | Cufflinks | exon | 10786656 | 10789761 | . | . | gene_id | "XLOC_147254"; | transcript_id | "Novel_002040"; | exon_number | "1"; | gene_type | " |
| Dt_chr11 | Cufflinks | exon | 10789967 | 10791689 | . | . | gene_id | "XLOC_147254"; | transcript_id | "Novel_002040"; | exon_number | "2"; | gene_type | " |
| Dt_chr11 | Cufflinks | exon | 12498572 | 12498777 | . | . | gene_id | "XLOC_147418"; | transcript_id | "Novel_002041"; | exon_number | "1"; | gene_type | " |
| Dt_chr11 | Cufflinks | exon | 12499084 | 12500182 | . | . | gene_id | "XLOC_147418"; | transcript_id | "Novel_002041"; | exon_number | "2"; | gene_type | " |
| Dt_chr11 | Cufflinks | exon | 13198687 | 13200128 | . | . | gene_id | "XLOC_147482"; | transcript_id | "Novel_002042"; | exon_number | "1"; | gene_type | " |
| Dt_chr11 | Cufflinks | exon | 13200219 | 13200416 | . | . | gene_id | "XLOC_147482"; | transcript_id | "Novel_002042"; | exon_number | "2"; | gene_type | " |
| Dt_chr11 | Cufflinks | exon | 13200778 | 13201010 | . | . | gene_id | "XLOC_147482"; | transcript_id | "Novel_002042"; | exon_number | "3"; | gene_type | " |
| Dt_chr11 | Cufflinks | exon | 13198991 | 13199149 | . | . | gene_id | "XLOC_147482"; | transcript_id | "Novel_002043"; | exon_number | "1"; | gene_type | " |
| Dt_chr11 | Cufflinks | exon | 13199996 | 13200128 | . | . | gene_id | "XLOC_147482"; | transcript_id | "Novel_002043"; | exon_number | "2"; | gene_type | " |
| Dt_chr11 | Cufflinks | exon | 13200219 | 13200416 | . | . | gene_id | "XLOC_147482"; | transcript_id | "Novel_002043"; | exon_number | "3"; | gene_type | " |
| Dt_chr11 | Cufflinks | exon | 13200778 | 13201053 | . | . | gene_id | "XLOC_147482"; | transcript_id | "Novel_002043"; | exon_number | "4"; | gene_type | " |
| Dt_chr11 | Cufflinks | exon | 13199237 | 13200128 | . | . | gene_id | "XLOC_147482"; | transcript_id | "Novel_002044"; | exon_number | "1"; | gene_type | " |
| Dt_chr11 | Cufflinks | exon | 13200778 | 13201076 | . | . | gene_id | "XLOC_147482"; | transcript_id | "Novel_002044"; | exon_number | "2"; | gene_type | " |
| Dt_chr11 | Cufflinks | exon | 14737306 | 14737468 | . | . | gene_id | "XLOC_147575"; | transcript_id | "Novel_002045"; | exon_number | "1"; | gene_type | " |
| Dt_chr11 | Cufflinks | exon | 14738026 | 14738868 | . | . | gene_id | "XLOC_147575"; | transcript_id | "Novel_002045"; | exon_number | "2"; | gene_type | " |
| Dt_chr11 | Cufflinks | exon | 14740626 | 14740763 | . | . | gene_id | "XLOC_147575"; | transcript_id | "Novel_002045"; | exon_number | "3"; | gene_type | " |

|          |           |      |          |          |   |   |   |         |                |               |                 |             |      |           |   |
|----------|-----------|------|----------|----------|---|---|---|---------|----------------|---------------|-----------------|-------------|------|-----------|---|
| Dt_chr11 | Cufflinks | exon | 14740835 | 14741104 | . | - | . | gene_id | "XLOC_147575"; | transcript_id | "Novel_002045"; | exon_number | "4"; | gene_type | " |
| Dt_chr11 | Cufflinks | exon | 19763252 | 19763597 | . | - | . | gene_id | "XLOC_148009"; | transcript_id | "Novel_002046"; | exon_number | "1"; | gene_type | " |
| Dt_chr11 | Cufflinks | exon | 19764275 | 19764326 | . | - | . | gene_id | "XLOC_148009"; | transcript_id | "Novel_002046"; | exon_number | "2"; | gene_type | " |
| Dt_chr11 | Cufflinks | exon | 19764495 | 19764568 | . | - | . | gene_id | "XLOC_148009"; | transcript_id | "Novel_002046"; | exon_number | "3"; | gene_type | " |
| Dt_chr11 | Cufflinks | exon | 19764844 | 19765185 | . | - | . | gene_id | "XLOC_148009"; | transcript_id | "Novel_002046"; | exon_number | "4"; | gene_type | " |
| Dt_chr11 | Cufflinks | exon | 21663674 | 21670217 | . | - | . | gene_id | "XLOC_148136"; | transcript_id | "Novel_002047"; | exon_number | "1"; | gene_type | " |
| Dt_chr11 | Cufflinks | exon | 21671801 | 21671854 | . | - | . | gene_id | "XLOC_148136"; | transcript_id | "Novel_002047"; | exon_number | "2"; | gene_type | " |
| Dt_chr11 | Cufflinks | exon | 21673685 | 21673922 | . | - | . | gene_id | "XLOC_148136"; | transcript_id | "Novel_002047"; | exon_number | "3"; | gene_type | " |
| Dt_chr11 | Cufflinks | exon | 21863787 | 21864433 | . | - | . | gene_id | "XLOC_148159"; | transcript_id | "Novel_002048"; | exon_number | "1"; | gene_type | " |
| Dt_chr11 | Cufflinks | exon | 21864940 | 21865229 | . | - | . | gene_id | "XLOC_148159"; | transcript_id | "Novel_002048"; | exon_number | "2"; | gene_type | " |
| Dt_chr11 | Cufflinks | exon | 23472808 | 23474048 | . | - | . | gene_id | "XLOC_148309"; | transcript_id | "Novel_002049"; | exon_number | "1"; | gene_type | " |
| Dt_chr11 | Cufflinks | exon | 23475292 | 23476054 | . | - | . | gene_id | "XLOC_148309"; | transcript_id | "Novel_002049"; | exon_number | "2"; | gene_type | " |
| Dt_chr11 | Cufflinks | exon | 26757211 | 26757891 | . | - | . | gene_id | "XLOC_148521"; | transcript_id | "Novel_002050"; | exon_number | "1"; | gene_type | " |
| Dt_chr11 | Cufflinks | exon | 26757998 | 26758410 | . | - | . | gene_id | "XLOC_148521"; | transcript_id | "Novel_002050"; | exon_number | "2"; | gene_type | " |
| Dt_chr11 | Cufflinks | exon | 26758640 | 26758880 | . | - | . | gene_id | "XLOC_148521"; | transcript_id | "Novel_002050"; | exon_number | "3"; | gene_type | " |
| Dt_chr11 | Cufflinks | exon | 26758982 | 26759248 | . | - | . | gene_id | "XLOC_148521"; | transcript_id | "Novel_002050"; | exon_number | "4"; | gene_type | " |
| Dt_chr11 | Cufflinks | exon | 26757324 | 26757891 | . | - | . | gene_id | "XLOC_148521"; | transcript_id | "Novel_002051"; | exon_number | "1"; | gene_type | " |
| Dt_chr11 | Cufflinks | exon | 26757998 | 26759248 | . | - | . | gene_id | "XLOC_148521"; | transcript_id | "Novel_002051"; | exon_number | "2"; | gene_type | " |
| Dt_chr11 | Cufflinks | exon | 26757324 | 26757891 | . | - | . | gene_id | "XLOC_148521"; | transcript_id | "Novel_002052"; | exon_number | "1"; | gene_type | " |
| Dt_chr11 | Cufflinks | exon | 26757998 | 26758880 | . | - | . | gene_id | "XLOC_148521"; | transcript_id | "Novel_002052"; | exon_number | "2"; | gene_type | " |
| Dt_chr11 | Cufflinks | exon | 26758982 | 26759264 | . | - | . | gene_id | "XLOC_148521"; | transcript_id | "Novel_002052"; | exon_number | "3"; | gene_type | " |
| Dt_chr11 | Cufflinks | exon | 28054413 | 28054703 | . | - | . | gene_id | "XLOC_148579"; | transcript_id | "Novel_002053"; | exon_number | "1"; | gene_type | " |
| Dt_chr11 | Cufflinks | exon | 28054794 | 28055246 | . | - | . | gene_id | "XLOC_148579"; | transcript_id | "Novel_002053"; | exon_number | "2"; | gene_type | " |
| Dt_chr11 | Cufflinks | exon | 28055334 | 28055993 | . | - | . | gene_id | "XLOC_148579"; | transcript_id | "Novel_002053"; | exon_number | "3"; | gene_type | " |
| Dt_chr11 | Cufflinks | exon | 28056103 | 28056209 | . | - | . | gene_id | "XLOC_148579"; | transcript_id | "Novel_002053"; | exon_number | "4"; | gene_type | " |
| Dt_chr11 | Cufflinks | exon | 28056331 | 28056625 | . | - | . | gene_id | "XLOC_148579"; | transcript_id | "Novel_002053"; | exon_number | "5"; | gene_type | " |
| Dt_chr11 | Cufflinks | exon | 28054413 | 28054703 | . | - | . | gene_id | "XLOC_148579"; | transcript_id | "Novel_002054"; | exon_number | "1"; | gene_type | " |
| Dt_chr11 | Cufflinks | exon | 28054794 | 28055246 | . | - | . | gene_id | "XLOC_148579"; | transcript_id | "Novel_002054"; | exon_number | "2"; | gene_type | " |
| Dt_chr11 | Cufflinks | exon | 28055334 | 28056209 | . | - | . | gene_id | "XLOC_148579"; | transcript_id | "Novel_002054"; | exon_number | "3"; | gene_type | " |
| Dt_chr11 | Cufflinks | exon | 28056331 | 28056625 | . | - | . | gene_id | "XLOC_148579"; | transcript_id | "Novel_002054"; | exon_number | "4"; | gene_type | " |
| Dt_chr11 | Cufflinks | exon | 30312040 | 30312061 | . | - | . | gene_id | "XLOC_148675"; | transcript_id | "Novel_002055"; | exon_number | "1"; | gene_type | " |
| Dt_chr11 | Cufflinks | exon | 30312156 | 30312271 | . | - | . | gene_id | "XLOC_148675"; | transcript_id | "Novel_002055"; | exon_number | "2"; | gene_type | " |
| Dt_chr11 | Cufflinks | exon | 30313177 | 30313274 | . | - | . | gene_id | "XLOC_148675"; | transcript_id | "Novel_002055"; | exon_number | "3"; | gene_type | " |
| Dt_chr11 | Cufflinks | exon | 30312042 | 30312061 | . | - | . | gene_id | "XLOC_148675"; | transcript_id | "Novel_002056"; | exon_number | "1"; | gene_type | " |
| Dt_chr11 | Cufflinks | exon | 30312156 | 30312271 | . | - | . | gene_id | "XLOC_148675"; | transcript_id | "Novel_002056"; | exon_number | "2"; | gene_type | " |

|          |           |      |          |          |   |   |   |         |                |               |                 |             |      |           |   |
|----------|-----------|------|----------|----------|---|---|---|---------|----------------|---------------|-----------------|-------------|------|-----------|---|
| Dt_chr11 | Cufflinks | exon | 30313177 | 30313270 | . | - | . | gene_id | "XLOC_148675"; | transcript_id | "Novel_002056"; | exon_number | "3"; | gene_type | " |
| Dt_chr11 | Cufflinks | exon | 30313731 | 30314064 | . | - | . | gene_id | "XLOC_148675"; | transcript_id | "Novel_002056"; | exon_number | "4"; | gene_type | " |
| Dt_chr11 | Cufflinks | exon | 36222611 | 36223575 | . | - | . | gene_id | "XLOC_148993"; | transcript_id | "Novel_002057"; | exon_number | "1"; | gene_type | " |
| Dt_chr11 | Cufflinks | exon | 36223680 | 36223801 | . | - | . | gene_id | "XLOC_148993"; | transcript_id | "Novel_002057"; | exon_number | "2"; | gene_type | " |
| Dt_chr11 | Cufflinks | exon | 36224563 | 36224865 | . | - | . | gene_id | "XLOC_148993"; | transcript_id | "Novel_002057"; | exon_number | "3"; | gene_type | " |
| Dt_chr11 | Cufflinks | exon | 36225636 | 36225725 | . | - | . | gene_id | "XLOC_148993"; | transcript_id | "Novel_002057"; | exon_number | "4"; | gene_type | " |
| Dt_chr11 | Cufflinks | exon | 36222613 | 36223575 | . | - | . | gene_id | "XLOC_148993"; | transcript_id | "Novel_002058"; | exon_number | "1"; | gene_type | " |
| Dt_chr11 | Cufflinks | exon | 36223680 | 36223801 | . | - | . | gene_id | "XLOC_148993"; | transcript_id | "Novel_002058"; | exon_number | "2"; | gene_type | " |
| Dt_chr11 | Cufflinks | exon | 36224563 | 36225738 | . | - | . | gene_id | "XLOC_148993"; | transcript_id | "Novel_002058"; | exon_number | "3"; | gene_type | " |
| Dt_chr11 | Cufflinks | exon | 36222644 | 36223575 | . | - | . | gene_id | "XLOC_148993"; | transcript_id | "Novel_002059"; | exon_number | "1"; | gene_type | " |
| Dt_chr11 | Cufflinks | exon | 36223680 | 36225578 | . | - | . | gene_id | "XLOC_148993"; | transcript_id | "Novel_002059"; | exon_number | "2"; | gene_type | " |
| Dt_chr11 | Cufflinks | exon | 36222937 | 36223575 | . | - | . | gene_id | "XLOC_148993"; | transcript_id | "Novel_002060"; | exon_number | "1"; | gene_type | " |
| Dt_chr11 | Cufflinks | exon | 36223680 | 36224865 | . | - | . | gene_id | "XLOC_148993"; | transcript_id | "Novel_002060"; | exon_number | "2"; | gene_type | " |
| Dt_chr11 | Cufflinks | exon | 36225631 | 36225738 | . | - | . | gene_id | "XLOC_148993"; | transcript_id | "Novel_002060"; | exon_number | "3"; | gene_type | " |
| Dt_chr11 | Cufflinks | exon | 36224546 | 36224865 | . | - | . | gene_id | "XLOC_148993"; | transcript_id | "Novel_002061"; | exon_number | "1"; | gene_type | " |
| Dt_chr11 | Cufflinks | exon | 36225636 | 36225754 | . | - | . | gene_id | "XLOC_148993"; | transcript_id | "Novel_002061"; | exon_number | "2"; | gene_type | " |
| Dt_chr11 | Cufflinks | exon | 37583313 | 37583628 | . | - | . | gene_id | "XLOC_149058"; | transcript_id | "Novel_002062"; | exon_number | "1"; | gene_type | " |
| Dt_chr11 | Cufflinks | exon | 37583713 | 37583770 | . | - | . | gene_id | "XLOC_149058"; | transcript_id | "Novel_002062"; | exon_number | "2"; | gene_type | " |
| Dt_chr11 | Cufflinks | exon | 37585519 | 37585746 | . | - | . | gene_id | "XLOC_149058"; | transcript_id | "Novel_002062"; | exon_number | "3"; | gene_type | " |
| Dt_chr11 | Cufflinks | exon | 37583313 | 37583628 | . | - | . | gene_id | "XLOC_149058"; | transcript_id | "Novel_002063"; | exon_number | "1"; | gene_type | " |
| Dt_chr11 | Cufflinks | exon | 37583713 | 37583770 | . | - | . | gene_id | "XLOC_149058"; | transcript_id | "Novel_002063"; | exon_number | "2"; | gene_type | " |
| Dt_chr11 | Cufflinks | exon | 37584732 | 37584793 | . | - | . | gene_id | "XLOC_149058"; | transcript_id | "Novel_002063"; | exon_number | "3"; | gene_type | " |
| Dt_chr11 | Cufflinks | exon | 37585519 | 37585746 | . | - | . | gene_id | "XLOC_149058"; | transcript_id | "Novel_002063"; | exon_number | "4"; | gene_type | " |
| Dt_chr11 | Cufflinks | exon | 37583386 | 37583628 | . | - | . | gene_id | "XLOC_149058"; | transcript_id | "Novel_002064"; | exon_number | "1"; | gene_type | " |
| Dt_chr11 | Cufflinks | exon | 37583713 | 37584351 | . | - | . | gene_id | "XLOC_149058"; | transcript_id | "Novel_002064"; | exon_number | "2"; | gene_type | " |
| Dt_chr11 | Cufflinks | exon | 37584630 | 37585049 | . | - | . | gene_id | "XLOC_149058"; | transcript_id | "Novel_002065"; | exon_number | "1"; | gene_type | " |
| Dt_chr11 | Cufflinks | exon | 37585519 | 37585746 | . | - | . | gene_id | "XLOC_149058"; | transcript_id | "Novel_002065"; | exon_number | "2"; | gene_type | " |
| Dt_chr11 | Cufflinks | exon | 39236947 | 39238735 | . | - | . | gene_id | "XLOC_149114"; | transcript_id | "Novel_002066"; | exon_number | "1"; | gene_type | " |
| Dt_chr11 | Cufflinks | exon | 39254013 | 39254245 | . | - | . | gene_id | "XLOC_149114"; | transcript_id | "Novel_002066"; | exon_number | "2"; | gene_type | " |
| Dt_chr11 | Cufflinks | exon | 39254826 | 39255235 | . | - | . | gene_id | "XLOC_149114"; | transcript_id | "Novel_002066"; | exon_number | "3"; | gene_type | " |
| Dt_chr11 | Cufflinks | exon | 39251701 | 39251753 | . | - | . | gene_id | "XLOC_149114"; | transcript_id | "Novel_002067"; | exon_number | "1"; | gene_type | " |
| Dt_chr11 | Cufflinks | exon | 39252452 | 39255254 | . | - | . | gene_id | "XLOC_149114"; | transcript_id | "Novel_002067"; | exon_number | "2"; | gene_type | " |
| Dt_chr11 | Cufflinks | exon | 40393649 | 40394200 | . | - | . | gene_id | "XLOC_149157"; | transcript_id | "Novel_002068"; | exon_number | "1"; | gene_type | " |
| Dt_chr11 | Cufflinks | exon | 40394477 | 40395424 | . | - | . | gene_id | "XLOC_149157"; | transcript_id | "Novel_002068"; | exon_number | "2"; | gene_type | " |
| Dt_chr11 | Cufflinks | exon | 40488159 | 40489105 | . | - | . | gene_id | "XLOC_149168"; | transcript_id | "Novel_002069"; | exon_number | "1"; | gene_type | " |

|          |           |      |          |          |   |   |   |         |                |               |                 |             |      |           |   |
|----------|-----------|------|----------|----------|---|---|---|---------|----------------|---------------|-----------------|-------------|------|-----------|---|
| Dt_chr11 | Cufflinks | exon | 40489226 | 40489328 | . | - | . | gene_id | "XLOC_149168"; | transcript_id | "Novel_002069"; | exon_number | "2"; | gene_type | " |
| Dt_chr11 | Cufflinks | exon | 40489567 | 40489747 | . | - | . | gene_id | "XLOC_149168"; | transcript_id | "Novel_002069"; | exon_number | "3"; | gene_type | " |
| Dt_chr11 | Cufflinks | exon | 43279424 | 43279803 | . | - | . | gene_id | "XLOC_149269"; | transcript_id | "Novel_002070"; | exon_number | "1"; | gene_type | " |
| Dt_chr11 | Cufflinks | exon | 43279876 | 43279989 | . | - | . | gene_id | "XLOC_149269"; | transcript_id | "Novel_002070"; | exon_number | "2"; | gene_type | " |
| Dt_chr11 | Cufflinks | exon | 43280943 | 43281011 | . | - | . | gene_id | "XLOC_149269"; | transcript_id | "Novel_002070"; | exon_number | "3"; | gene_type | " |
| Dt_chr11 | Cufflinks | exon | 43282252 | 43282292 | . | - | . | gene_id | "XLOC_149269"; | transcript_id | "Novel_002070"; | exon_number | "4"; | gene_type | " |
| Dt_chr11 | Cufflinks | exon | 43282531 | 43282650 | . | - | . | gene_id | "XLOC_149269"; | transcript_id | "Novel_002070"; | exon_number | "5"; | gene_type | " |
| Dt_chr11 | Cufflinks | exon | 43283300 | 43283470 | . | - | . | gene_id | "XLOC_149269"; | transcript_id | "Novel_002070"; | exon_number | "6"; | gene_type | " |
| Dt_chr11 | Cufflinks | exon | 43283571 | 43283809 | . | - | . | gene_id | "XLOC_149269"; | transcript_id | "Novel_002070"; | exon_number | "7"; | gene_type | " |
| Dt_chr11 | Cufflinks | exon | 43279424 | 43279803 | . | - | . | gene_id | "XLOC_149269"; | transcript_id | "Novel_002071"; | exon_number | "1"; | gene_type | " |
| Dt_chr11 | Cufflinks | exon | 43279876 | 43279989 | . | - | . | gene_id | "XLOC_149269"; | transcript_id | "Novel_002071"; | exon_number | "2"; | gene_type | " |
| Dt_chr11 | Cufflinks | exon | 43280943 | 43281011 | . | - | . | gene_id | "XLOC_149269"; | transcript_id | "Novel_002071"; | exon_number | "3"; | gene_type | " |
| Dt_chr11 | Cufflinks | exon | 43282531 | 43282650 | . | - | . | gene_id | "XLOC_149269"; | transcript_id | "Novel_002071"; | exon_number | "4"; | gene_type | " |
| Dt_chr11 | Cufflinks | exon | 43283300 | 43283809 | . | - | . | gene_id | "XLOC_149269"; | transcript_id | "Novel_002071"; | exon_number | "5"; | gene_type | " |
| Dt_chr11 | Cufflinks | exon | 43279508 | 43279989 | . | - | . | gene_id | "XLOC_149269"; | transcript_id | "Novel_002072"; | exon_number | "1"; | gene_type | " |
| Dt_chr11 | Cufflinks | exon | 43280943 | 43281523 | . | - | . | gene_id | "XLOC_149269"; | transcript_id | "Novel_002072"; | exon_number | "2"; | gene_type | " |
| Dt_chr11 | Cufflinks | exon | 43282252 | 43282292 | . | - | . | gene_id | "XLOC_149269"; | transcript_id | "Novel_002072"; | exon_number | "3"; | gene_type | " |
| Dt_chr11 | Cufflinks | exon | 43282531 | 43282650 | . | - | . | gene_id | "XLOC_149269"; | transcript_id | "Novel_002072"; | exon_number | "4"; | gene_type | " |
| Dt_chr11 | Cufflinks | exon | 43283300 | 43283470 | . | - | . | gene_id | "XLOC_149269"; | transcript_id | "Novel_002072"; | exon_number | "5"; | gene_type | " |
| Dt_chr11 | Cufflinks | exon | 43283571 | 43283821 | . | - | . | gene_id | "XLOC_149269"; | transcript_id | "Novel_002072"; | exon_number | "6"; | gene_type | " |
| Dt_chr11 | Cufflinks | exon | 44405783 | 44406166 | . | - | . | gene_id | "XLOC_149320"; | transcript_id | "Novel_002073"; | exon_number | "1"; | gene_type | " |
| Dt_chr11 | Cufflinks | exon | 44406475 | 44407515 | . | - | . | gene_id | "XLOC_149320"; | transcript_id | "Novel_002073"; | exon_number | "2"; | gene_type | " |
| Dt_chr11 | Cufflinks | exon | 45358628 | 45359156 | . | - | . | gene_id | "XLOC_149398"; | transcript_id | "Novel_002074"; | exon_number | "1"; | gene_type | " |
| Dt_chr11 | Cufflinks | exon | 45359239 | 45359640 | . | - | . | gene_id | "XLOC_149398"; | transcript_id | "Novel_002074"; | exon_number | "2"; | gene_type | " |
| Dt_chr11 | Cufflinks | exon | 45457561 | 45458467 | . | - | . | gene_id | "XLOC_149407"; | transcript_id | "Novel_002075"; | exon_number | "1"; | gene_type | " |
| Dt_chr11 | Cufflinks | exon | 45458566 | 45458623 | . | - | . | gene_id | "XLOC_149407"; | transcript_id | "Novel_002075"; | exon_number | "2"; | gene_type | " |
| Dt_chr11 | Cufflinks | exon | 45460311 | 45460748 | . | - | . | gene_id | "XLOC_149407"; | transcript_id | "Novel_002075"; | exon_number | "3"; | gene_type | " |
| Dt_chr11 | Cufflinks | exon | 46817048 | 46817442 | . | - | . | gene_id | "XLOC_149544"; | transcript_id | "Novel_002076"; | exon_number | "1"; | gene_type | " |
| Dt_chr11 | Cufflinks | exon | 46819208 | 46819255 | . | - | . | gene_id | "XLOC_149544"; | transcript_id | "Novel_002076"; | exon_number | "2"; | gene_type | " |
| Dt_chr11 | Cufflinks | exon | 46819487 | 46819689 | . | - | . | gene_id | "XLOC_149544"; | transcript_id | "Novel_002076"; | exon_number | "3"; | gene_type | " |
| Dt_chr11 | Cufflinks | exon | 47283928 | 47284203 | . | - | . | gene_id | "XLOC_149586"; | transcript_id | "Novel_002077"; | exon_number | "1"; | gene_type | " |
| Dt_chr11 | Cufflinks | exon | 48064074 | 48067892 | . | - | . | gene_id | "XLOC_149694"; | transcript_id | "Novel_002078"; | exon_number | "1"; | gene_type | " |
| Dt_chr11 | Cufflinks | exon | 48068059 | 48068484 | . | - | . | gene_id | "XLOC_149694"; | transcript_id | "Novel_002078"; | exon_number | "2"; | gene_type | " |
| Dt_chr11 | Cufflinks | exon | 48616207 | 48616559 | . | - | . | gene_id | "XLOC_149810"; | transcript_id | "Novel_002079"; | exon_number | "1"; | gene_type | " |
| Dt_chr11 | Cufflinks | exon | 48618129 | 48618622 | . | - | . | gene_id | "XLOC_149810"; | transcript_id | "Novel_002079"; | exon_number | "2"; | gene_type | " |



|          |           |      |          |          |   |   |   |         |                |               |                 |             |      |           |   |
|----------|-----------|------|----------|----------|---|---|---|---------|----------------|---------------|-----------------|-------------|------|-----------|---|
| Dt_chr11 | Cufflinks | exon | 50000185 | 50000577 | . | - | . | gene_id | "XLOC_149950"; | transcript_id | "Novel_002080"; | exon_number | "1"; | gene_type | " |
| Dt_chr11 | Cufflinks | exon | 53549773 | 53550221 | . | - | . | gene_id | "XLOC_150206"; | transcript_id | "Novel_002081"; | exon_number | "1"; | gene_type | " |
| Dt_chr11 | Cufflinks | exon | 53550319 | 53550404 | . | - | . | gene_id | "XLOC_150206"; | transcript_id | "Novel_002081"; | exon_number | "2"; | gene_type | " |
| Dt_chr11 | Cufflinks | exon | 54311655 | 54312136 | . | - | . | gene_id | "XLOC_150235"; | transcript_id | "Novel_002082"; | exon_number | "1"; | gene_type | " |
| Dt_chr11 | Cufflinks | exon | 54312327 | 54312486 | . | - | . | gene_id | "XLOC_150235"; | transcript_id | "Novel_002082"; | exon_number | "2"; | gene_type | " |
| Dt_chr11 | Cufflinks | exon | 54311655 | 54312136 | . | - | . | gene_id | "XLOC_150235"; | transcript_id | "Novel_002083"; | exon_number | "1"; | gene_type | " |
| Dt_chr11 | Cufflinks | exon | 54312381 | 54312502 | . | - | . | gene_id | "XLOC_150235"; | transcript_id | "Novel_002083"; | exon_number | "2"; | gene_type | " |
| Dt_chr12 | Cufflinks | exon | 1259394  | 1259528  | . | + | . | gene_id | "XLOC_151131"; | transcript_id | "Novel_002084"; | exon_number | "1"; | gene_type | " |
| Dt_chr12 | Cufflinks | exon | 1259665  | 1259731  | . | + | . | gene_id | "XLOC_151131"; | transcript_id | "Novel_002084"; | exon_number | "2"; | gene_type | " |
| Dt_chr12 | Cufflinks | exon | 1260726  | 1262246  | . | + | . | gene_id | "XLOC_151131"; | transcript_id | "Novel_002084"; | exon_number | "3"; | gene_type | " |
| Dt_chr12 | Cufflinks | exon | 1259394  | 1259528  | . | + | . | gene_id | "XLOC_151131"; | transcript_id | "Novel_002085"; | exon_number | "1"; | gene_type | " |
| Dt_chr12 | Cufflinks | exon | 1259665  | 1259735  | . | + | . | gene_id | "XLOC_151131"; | transcript_id | "Novel_002085"; | exon_number | "2"; | gene_type | " |
| Dt_chr12 | Cufflinks | exon | 1260726  | 1262246  | . | + | . | gene_id | "XLOC_151131"; | transcript_id | "Novel_002085"; | exon_number | "3"; | gene_type | " |
| Dt_chr12 | Cufflinks | exon | 1396266  | 1396395  | . | + | . | gene_id | "XLOC_151149"; | transcript_id | "Novel_002086"; | exon_number | "1"; | gene_type | " |
| Dt_chr12 | Cufflinks | exon | 1396485  | 1396642  | . | + | . | gene_id | "XLOC_151149"; | transcript_id | "Novel_002086"; | exon_number | "2"; | gene_type | " |
| Dt_chr12 | Cufflinks | exon | 1397464  | 1397534  | . | + | . | gene_id | "XLOC_151149"; | transcript_id | "Novel_002086"; | exon_number | "3"; | gene_type | " |
| Dt_chr12 | Cufflinks | exon | 1396330  | 1396395  | . | + | . | gene_id | "XLOC_151149"; | transcript_id | "Novel_002087"; | exon_number | "1"; | gene_type | " |
| Dt_chr12 | Cufflinks | exon | 1396485  | 1396724  | . | + | . | gene_id | "XLOC_151149"; | transcript_id | "Novel_002087"; | exon_number | "2"; | gene_type | " |
| Dt_chr12 | Cufflinks | exon | 1632337  | 1632538  | . | + | . | gene_id | "XLOC_151207"; | transcript_id | "Novel_002088"; | exon_number | "1"; | gene_type | " |
| Dt_chr12 | Cufflinks | exon | 1632720  | 1632769  | . | + | . | gene_id | "XLOC_151207"; | transcript_id | "Novel_002088"; | exon_number | "2"; | gene_type | " |
| Dt_chr12 | Cufflinks | exon | 2088812  | 2089069  | . | + | . | gene_id | "XLOC_151262"; | transcript_id | "Novel_002089"; | exon_number | "1"; | gene_type | " |
| Dt_chr12 | Cufflinks | exon | 3192322  | 3192695  | . | + | . | gene_id | "XLOC_151387"; | transcript_id | "Novel_002090"; | exon_number | "1"; | gene_type | " |
| Dt_chr12 | Cufflinks | exon | 3192793  | 3193108  | . | + | . | gene_id | "XLOC_151387"; | transcript_id | "Novel_002090"; | exon_number | "2"; | gene_type | " |
| Dt_chr12 | Cufflinks | exon | 3193733  | 3193828  | . | + | . | gene_id | "XLOC_151387"; | transcript_id | "Novel_002090"; | exon_number | "3"; | gene_type | " |
| Dt_chr12 | Cufflinks | exon | 3194336  | 3194404  | . | + | . | gene_id | "XLOC_151387"; | transcript_id | "Novel_002090"; | exon_number | "4"; | gene_type | " |
| Dt_chr12 | Cufflinks | exon | 3195245  | 3195373  | . | + | . | gene_id | "XLOC_151387"; | transcript_id | "Novel_002090"; | exon_number | "5"; | gene_type | " |
| Dt_chr12 | Cufflinks | exon | 3195740  | 3195839  | . | + | . | gene_id | "XLOC_151387"; | transcript_id | "Novel_002090"; | exon_number | "6"; | gene_type | " |
| Dt_chr12 | Cufflinks | exon | 3196286  | 3197152  | . | + | . | gene_id | "XLOC_151387"; | transcript_id | "Novel_002090"; | exon_number | "7"; | gene_type | " |
| Dt_chr12 | Cufflinks | exon | 4286930  | 4287277  | . | + | . | gene_id | "XLOC_151546"; | transcript_id | "Novel_002091"; | exon_number | "1"; | gene_type | " |
| Dt_chr12 | Cufflinks | exon | 4287580  | 4287760  | . | + | . | gene_id | "XLOC_151546"; | transcript_id | "Novel_002091"; | exon_number | "2"; | gene_type | " |
| Dt_chr12 | Cufflinks | exon | 4289395  | 4289882  | . | + | . | gene_id | "XLOC_151546"; | transcript_id | "Novel_002091"; | exon_number | "3"; | gene_type | " |
| Dt_chr12 | Cufflinks | exon | 4287072  | 4287154  | . | + | . | gene_id | "XLOC_151546"; | transcript_id | "Novel_002092"; | exon_number | "1"; | gene_type | " |
| Dt_chr12 | Cufflinks | exon | 4287587  | 4287760  | . | + | . | gene_id | "XLOC_151546"; | transcript_id | "Novel_002092"; | exon_number | "2"; | gene_type | " |
| Dt_chr12 | Cufflinks | exon | 4289395  | 4289877  | . | + | . | gene_id | "XLOC_151546"; | transcript_id | "Novel_002092"; | exon_number | "3"; | gene_type | " |
| Dt_chr12 | Cufflinks | exon | 5346844  | 5347045  | . | + | . | gene_id | "XLOC_151728"; | transcript_id | "Novel_002093"; | exon_number | "1"; | gene_type | " |

|          |           |      |         |         |   |   |   |         |                |               |                 |             |       |           |   |
|----------|-----------|------|---------|---------|---|---|---|---------|----------------|---------------|-----------------|-------------|-------|-----------|---|
| Dt_chr12 | Cufflinks | exon | 5347118 | 5347168 | . | + | . | gene_id | "XLOC_151728"; | transcript_id | "Novel_002093"; | exon_number | "2";  | gene_type | " |
| Dt_chr12 | Cufflinks | exon | 5347262 | 5347338 | . | + | . | gene_id | "XLOC_151728"; | transcript_id | "Novel_002093"; | exon_number | "3";  | gene_type | " |
| Dt_chr12 | Cufflinks | exon | 5347434 | 5347521 | . | + | . | gene_id | "XLOC_151728"; | transcript_id | "Novel_002093"; | exon_number | "4";  | gene_type | " |
| Dt_chr12 | Cufflinks | exon | 5347606 | 5347881 | . | + | . | gene_id | "XLOC_151728"; | transcript_id | "Novel_002093"; | exon_number | "5";  | gene_type | " |
| Dt_chr12 | Cufflinks | exon | 5347977 | 5348225 | . | + | . | gene_id | "XLOC_151728"; | transcript_id | "Novel_002093"; | exon_number | "6";  | gene_type | " |
| Dt_chr12 | Cufflinks | exon | 5348312 | 5348623 | . | + | . | gene_id | "XLOC_151728"; | transcript_id | "Novel_002093"; | exon_number | "7";  | gene_type | " |
| Dt_chr12 | Cufflinks | exon | 5347571 | 5347881 | . | + | . | gene_id | "XLOC_151728"; | transcript_id | "Novel_002094"; | exon_number | "1";  | gene_type | " |
| Dt_chr12 | Cufflinks | exon | 5347977 | 5348225 | . | + | . | gene_id | "XLOC_151728"; | transcript_id | "Novel_002094"; | exon_number | "2";  | gene_type | " |
| Dt_chr12 | Cufflinks | exon | 5348312 | 5348623 | . | + | . | gene_id | "XLOC_151728"; | transcript_id | "Novel_002094"; | exon_number | "3";  | gene_type | " |
| Dt_chr12 | Cufflinks | exon | 5643937 | 5644194 | . | + | . | gene_id | "XLOC_151793"; | transcript_id | "Novel_002095"; | exon_number | "1";  | gene_type | " |
| Dt_chr12 | Cufflinks | exon | 5645600 | 5645656 | . | + | . | gene_id | "XLOC_151793"; | transcript_id | "Novel_002095"; | exon_number | "2";  | gene_type | " |
| Dt_chr12 | Cufflinks | exon | 5646533 | 5649264 | . | + | . | gene_id | "XLOC_151793"; | transcript_id | "Novel_002095"; | exon_number | "3";  | gene_type | " |
| Dt_chr12 | Cufflinks | exon | 5900971 | 5901213 | . | + | . | gene_id | "XLOC_151824"; | transcript_id | "Novel_002096"; | exon_number | "1";  | gene_type | " |
| Dt_chr12 | Cufflinks | exon | 6033577 | 6033848 | . | + | . | gene_id | "XLOC_151844"; | transcript_id | "Novel_002097"; | exon_number | "1";  | gene_type | " |
| Dt_chr12 | Cufflinks | exon | 6034653 | 6036151 | . | + | . | gene_id | "XLOC_151844"; | transcript_id | "Novel_002097"; | exon_number | "2";  | gene_type | " |
| Dt_chr12 | Cufflinks | exon | 6036822 | 6037168 | . | + | . | gene_id | "XLOC_151844"; | transcript_id | "Novel_002097"; | exon_number | "3";  | gene_type | " |
| Dt_chr12 | Cufflinks | exon | 6047906 | 6047983 | . | + | . | gene_id | "XLOC_151849"; | transcript_id | "Novel_002098"; | exon_number | "1";  | gene_type | " |
| Dt_chr12 | Cufflinks | exon | 6048313 | 6048992 | . | + | . | gene_id | "XLOC_151849"; | transcript_id | "Novel_002098"; | exon_number | "2";  | gene_type | " |
| Dt_chr12 | Cufflinks | exon | 6049096 | 6049135 | . | + | . | gene_id | "XLOC_151849"; | transcript_id | "Novel_002098"; | exon_number | "3";  | gene_type | " |
| Dt_chr12 | Cufflinks | exon | 6049367 | 6049419 | . | + | . | gene_id | "XLOC_151849"; | transcript_id | "Novel_002098"; | exon_number | "4";  | gene_type | " |
| Dt_chr12 | Cufflinks | exon | 6049682 | 6049727 | . | + | . | gene_id | "XLOC_151849"; | transcript_id | "Novel_002098"; | exon_number | "5";  | gene_type | " |
| Dt_chr12 | Cufflinks | exon | 6049887 | 6049979 | . | + | . | gene_id | "XLOC_151849"; | transcript_id | "Novel_002098"; | exon_number | "6";  | gene_type | " |
| Dt_chr12 | Cufflinks | exon | 6050573 | 6050695 | . | + | . | gene_id | "XLOC_151849"; | transcript_id | "Novel_002098"; | exon_number | "7";  | gene_type | " |
| Dt_chr12 | Cufflinks | exon | 6050814 | 6050865 | . | + | . | gene_id | "XLOC_151849"; | transcript_id | "Novel_002098"; | exon_number | "8";  | gene_type | " |
| Dt_chr12 | Cufflinks | exon | 6050953 | 6051028 | . | + | . | gene_id | "XLOC_151849"; | transcript_id | "Novel_002098"; | exon_number | "9";  | gene_type | " |
| Dt_chr12 | Cufflinks | exon | 6051120 | 6051201 | . | + | . | gene_id | "XLOC_151849"; | transcript_id | "Novel_002098"; | exon_number | "10"; | gene_type | " |
| Dt_chr12 | Cufflinks | exon | 6051292 | 6051342 | . | + | . | gene_id | "XLOC_151849"; | transcript_id | "Novel_002098"; | exon_number | "11"; | gene_type | " |
| Dt_chr12 | Cufflinks | exon | 6051698 | 6051790 | . | + | . | gene_id | "XLOC_151849"; | transcript_id | "Novel_002098"; | exon_number | "12"; | gene_type | " |
| Dt_chr12 | Cufflinks | exon | 6051930 | 6052504 | . | + | . | gene_id | "XLOC_151849"; | transcript_id | "Novel_002098"; | exon_number | "13"; | gene_type | " |
| Dt_chr12 | Cufflinks | exon | 8500904 | 8501498 | . | + | . | gene_id | "XLOC_152102"; | transcript_id | "Novel_002099"; | exon_number | "1";  | gene_type | " |
| Dt_chr12 | Cufflinks | exon | 8502073 | 8502148 | . | + | . | gene_id | "XLOC_152102"; | transcript_id | "Novel_002099"; | exon_number | "2";  | gene_type | " |
| Dt_chr12 | Cufflinks | exon | 8502237 | 8503013 | . | + | . | gene_id | "XLOC_152102"; | transcript_id | "Novel_002099"; | exon_number | "3";  | gene_type | " |
| Dt_chr12 | Cufflinks | exon | 8503131 | 8503754 | . | + | . | gene_id | "XLOC_152102"; | transcript_id | "Novel_002099"; | exon_number | "4";  | gene_type | " |
| Dt_chr12 | Cufflinks | exon | 8504273 | 8504527 | . | + | . | gene_id | "XLOC_152102"; | transcript_id | "Novel_002099"; | exon_number | "5";  | gene_type | " |
| Dt_chr12 | Cufflinks | exon | 9279665 | 9279994 | . | + | . | gene_id | "XLOC_152169"; | transcript_id | "Novel_002100"; | exon_number | "1";  | gene_type | " |



|          |           |      |          |          |   |   |   |         |                |               |                 |             |      |           |   |
|----------|-----------|------|----------|----------|---|---|---|---------|----------------|---------------|-----------------|-------------|------|-----------|---|
| Dt_chr12 | Cufflinks | exon | 11479048 | 11479299 | . | + | . | gene_id | "XLOC_152432"; | transcript_id | "Novel_002109"; | exon_number | "4"; | gene_type | " |
| Dt_chr12 | Cufflinks | exon | 11476456 | 11476881 | . | + | . | gene_id | "XLOC_152432"; | transcript_id | "Novel_002110"; | exon_number | "1"; | gene_type | " |
| Dt_chr12 | Cufflinks | exon | 11476973 | 11477100 | . | + | . | gene_id | "XLOC_152432"; | transcript_id | "Novel_002110"; | exon_number | "2"; | gene_type | " |
| Dt_chr12 | Cufflinks | exon | 11477191 | 11477433 | . | + | . | gene_id | "XLOC_152432"; | transcript_id | "Novel_002110"; | exon_number | "3"; | gene_type | " |
| Dt_chr12 | Cufflinks | exon | 11478332 | 11478584 | . | + | . | gene_id | "XLOC_152432"; | transcript_id | "Novel_002110"; | exon_number | "4"; | gene_type | " |
| Dt_chr12 | Cufflinks | exon | 11479048 | 11479263 | . | + | . | gene_id | "XLOC_152432"; | transcript_id | "Novel_002110"; | exon_number | "5"; | gene_type | " |
| Dt_chr12 | Cufflinks | exon | 11515132 | 11515376 | . | + | . | gene_id | "XLOC_152435"; | transcript_id | "Novel_002111"; | exon_number | "1"; | gene_type | " |
| Dt_chr12 | Cufflinks | exon | 11515491 | 11515733 | . | + | . | gene_id | "XLOC_152435"; | transcript_id | "Novel_002111"; | exon_number | "2"; | gene_type | " |
| Dt_chr12 | Cufflinks | exon | 11515825 | 11516077 | . | + | . | gene_id | "XLOC_152435"; | transcript_id | "Novel_002111"; | exon_number | "3"; | gene_type | " |
| Dt_chr12 | Cufflinks | exon | 11516894 | 11517226 | . | + | . | gene_id | "XLOC_152435"; | transcript_id | "Novel_002111"; | exon_number | "4"; | gene_type | " |
| Dt_chr12 | Cufflinks | exon | 11688410 | 11688702 | . | + | . | gene_id | "XLOC_152463"; | transcript_id | "Novel_002112"; | exon_number | "1"; | gene_type | " |
| Dt_chr12 | Cufflinks | exon | 11688798 | 11689244 | . | + | . | gene_id | "XLOC_152463"; | transcript_id | "Novel_002112"; | exon_number | "2"; | gene_type | " |
| Dt_chr12 | Cufflinks | exon | 11688433 | 11691165 | . | + | . | gene_id | "XLOC_152463"; | transcript_id | "Novel_002113"; | exon_number | "1"; | gene_type | " |
| Dt_chr12 | Cufflinks | exon | 11691282 | 11691360 | . | + | . | gene_id | "XLOC_152463"; | transcript_id | "Novel_002113"; | exon_number | "2"; | gene_type | " |
| Dt_chr12 | Cufflinks | exon | 11692511 | 11692582 | . | + | . | gene_id | "XLOC_152463"; | transcript_id | "Novel_002113"; | exon_number | "3"; | gene_type | " |
| Dt_chr12 | Cufflinks | exon | 11692678 | 11693007 | . | + | . | gene_id | "XLOC_152463"; | transcript_id | "Novel_002113"; | exon_number | "4"; | gene_type | " |
| Dt_chr12 | Cufflinks | exon | 21301419 | 21301852 | . | + | . | gene_id | "XLOC_153057"; | transcript_id | "Novel_002114"; | exon_number | "1"; | gene_type | " |
| Dt_chr12 | Cufflinks | exon | 21301971 | 21302065 | . | + | . | gene_id | "XLOC_153057"; | transcript_id | "Novel_002114"; | exon_number | "2"; | gene_type | " |
| Dt_chr12 | Cufflinks | exon | 21302460 | 21302559 | . | + | . | gene_id | "XLOC_153057"; | transcript_id | "Novel_002114"; | exon_number | "3"; | gene_type | " |
| Dt_chr12 | Cufflinks | exon | 21302774 | 21302878 | . | + | . | gene_id | "XLOC_153057"; | transcript_id | "Novel_002114"; | exon_number | "4"; | gene_type | " |
| Dt_chr12 | Cufflinks | exon | 21303040 | 21306778 | . | + | . | gene_id | "XLOC_153057"; | transcript_id | "Novel_002114"; | exon_number | "5"; | gene_type | " |
| Dt_chr12 | Cufflinks | exon | 22794689 | 22794941 | . | + | . | gene_id | "XLOC_153154"; | transcript_id | "Novel_002115"; | exon_number | "1"; | gene_type | " |
| Dt_chr12 | Cufflinks | exon | 22795504 | 22795731 | . | + | . | gene_id | "XLOC_153154"; | transcript_id | "Novel_002115"; | exon_number | "2"; | gene_type | " |
| Dt_chr12 | Cufflinks | exon | 22795837 | 22796914 | . | + | . | gene_id | "XLOC_153154"; | transcript_id | "Novel_002115"; | exon_number | "3"; | gene_type | " |
| Dt_chr12 | Cufflinks | exon | 26247071 | 26249144 | . | + | . | gene_id | "XLOC_153309"; | transcript_id | "Novel_002116"; | exon_number | "1"; | gene_type | " |
| Dt_chr12 | Cufflinks | exon | 26249230 | 26249756 | . | + | . | gene_id | "XLOC_153309"; | transcript_id | "Novel_002116"; | exon_number | "2"; | gene_type | " |
| Dt_chr12 | Cufflinks | exon | 29293918 | 29294653 | . | + | . | gene_id | "XLOC_153535"; | transcript_id | "Novel_002117"; | exon_number | "1"; | gene_type | " |
| Dt_chr12 | Cufflinks | exon | 29294761 | 29295042 | . | + | . | gene_id | "XLOC_153535"; | transcript_id | "Novel_002117"; | exon_number | "2"; | gene_type | " |
| Dt_chr12 | Cufflinks | exon | 29459669 | 29459692 | . | + | . | gene_id | "XLOC_153555"; | transcript_id | "Novel_002118"; | exon_number | "1"; | gene_type | " |
| Dt_chr12 | Cufflinks | exon | 29460853 | 29462847 | . | + | . | gene_id | "XLOC_153555"; | transcript_id | "Novel_002118"; | exon_number | "2"; | gene_type | " |
| Dt_chr12 | Cufflinks | exon | 29459697 | 29460548 | . | + | . | gene_id | "XLOC_153555"; | transcript_id | "Novel_002119"; | exon_number | "1"; | gene_type | " |
| Dt_chr12 | Cufflinks | exon | 29460853 | 29462718 | . | + | . | gene_id | "XLOC_153555"; | transcript_id | "Novel_002119"; | exon_number | "2"; | gene_type | " |
| Dt_chr12 | Cufflinks | exon | 30308804 | 30308946 | . | + | . | gene_id | "XLOC_153654"; | transcript_id | "Novel_002120"; | exon_number | "1"; | gene_type | " |
| Dt_chr12 | Cufflinks | exon | 30309354 | 30309453 | . | + | . | gene_id | "XLOC_153654"; | transcript_id | "Novel_002120"; | exon_number | "2"; | gene_type | " |
| Dt_chr12 | Cufflinks | exon | 30531403 | 30533197 | . | + | . | gene_id | "XLOC_153664"; | transcript_id | "Novel_002121"; | exon_number | "1"; | gene_type | " |

|          |           |      |          |          |   |   |   |         |                |               |                 |             |      |           |   |
|----------|-----------|------|----------|----------|---|---|---|---------|----------------|---------------|-----------------|-------------|------|-----------|---|
| Dt_chr12 | Cufflinks | exon | 30533404 | 30535111 | . | + | . | gene_id | "XLOC_153664"; | transcript_id | "Novel_002121"; | exon_number | "2"; | gene_type | " |
| Dt_chr12 | Cufflinks | exon | 31310341 | 31310661 | . | + | . | gene_id | "XLOC_153750"; | transcript_id | "Novel_002122"; | exon_number | "1"; | gene_type | " |
| Dt_chr12 | Cufflinks | exon | 31311335 | 31311432 | . | + | . | gene_id | "XLOC_153750"; | transcript_id | "Novel_002122"; | exon_number | "2"; | gene_type | " |
| Dt_chr12 | Cufflinks | exon | 31311593 | 31311623 | . | + | . | gene_id | "XLOC_153750"; | transcript_id | "Novel_002122"; | exon_number | "3"; | gene_type | " |
| Dt_chr12 | Cufflinks | exon | 31312224 | 31312323 | . | + | . | gene_id | "XLOC_153750"; | transcript_id | "Novel_002122"; | exon_number | "4"; | gene_type | " |
| Dt_chr12 | Cufflinks | exon | 31313668 | 31313738 | . | + | . | gene_id | "XLOC_153750"; | transcript_id | "Novel_002122"; | exon_number | "5"; | gene_type | " |
| Dt_chr12 | Cufflinks | exon | 31313851 | 31313994 | . | + | . | gene_id | "XLOC_153750"; | transcript_id | "Novel_002122"; | exon_number | "6"; | gene_type | " |
| Dt_chr12 | Cufflinks | exon | 31314256 | 31314563 | . | + | . | gene_id | "XLOC_153750"; | transcript_id | "Novel_002122"; | exon_number | "7"; | gene_type | " |
| Dt_chr12 | Cufflinks | exon | 31312082 | 31312323 | . | + | . | gene_id | "XLOC_153750"; | transcript_id | "Novel_002123"; | exon_number | "1"; | gene_type | " |
| Dt_chr12 | Cufflinks | exon | 31313668 | 31313738 | . | + | . | gene_id | "XLOC_153750"; | transcript_id | "Novel_002123"; | exon_number | "2"; | gene_type | " |
| Dt_chr12 | Cufflinks | exon | 31313851 | 31313994 | . | + | . | gene_id | "XLOC_153750"; | transcript_id | "Novel_002123"; | exon_number | "3"; | gene_type | " |
| Dt_chr12 | Cufflinks | exon | 31314256 | 31314563 | . | + | . | gene_id | "XLOC_153750"; | transcript_id | "Novel_002123"; | exon_number | "4"; | gene_type | " |
| Dt_chr12 | Cufflinks | exon | 31745507 | 31747086 | . | + | . | gene_id | "XLOC_153781"; | transcript_id | "Novel_002124"; | exon_number | "1"; | gene_type | " |
| Dt_chr12 | Cufflinks | exon | 34208330 | 34208621 | . | + | . | gene_id | "XLOC_153918"; | transcript_id | "Novel_002125"; | exon_number | "1"; | gene_type | " |
| Dt_chr12 | Cufflinks | exon | 34208975 | 34209118 | . | + | . | gene_id | "XLOC_153918"; | transcript_id | "Novel_002125"; | exon_number | "2"; | gene_type | " |
| Dt_chr12 | Cufflinks | exon | 34209702 | 34209907 | . | + | . | gene_id | "XLOC_153918"; | transcript_id | "Novel_002125"; | exon_number | "3"; | gene_type | " |
| Dt_chr12 | Cufflinks | exon | 34210083 | 34210693 | . | + | . | gene_id | "XLOC_153918"; | transcript_id | "Novel_002125"; | exon_number | "4"; | gene_type | " |
| Dt_chr12 | Cufflinks | exon | 37086915 | 37087133 | . | + | . | gene_id | "XLOC_154065"; | transcript_id | "Novel_002126"; | exon_number | "1"; | gene_type | " |
| Dt_chr12 | Cufflinks | exon | 1963976  | 1964176  | . | - | . | gene_id | "XLOC_154417"; | transcript_id | "Novel_002127"; | exon_number | "1"; | gene_type | " |
| Dt_chr12 | Cufflinks | exon | 1985825  | 1986073  | . | - | . | gene_id | "XLOC_154418"; | transcript_id | "Novel_002128"; | exon_number | "1"; | gene_type | " |
| Dt_chr12 | Cufflinks | exon | 2836415  | 2836627  | . | - | . | gene_id | "XLOC_154491"; | transcript_id | "Novel_002129"; | exon_number | "1"; | gene_type | " |
| Dt_chr12 | Cufflinks | exon | 3254680  | 3256825  | . | - | . | gene_id | "XLOC_154587"; | transcript_id | "Novel_002130"; | exon_number | "1"; | gene_type | " |
| Dt_chr12 | Cufflinks | exon | 3258251  | 3258331  | . | - | . | gene_id | "XLOC_154587"; | transcript_id | "Novel_002130"; | exon_number | "2"; | gene_type | " |
| Dt_chr12 | Cufflinks | exon | 3258449  | 3258554  | . | - | . | gene_id | "XLOC_154587"; | transcript_id | "Novel_002130"; | exon_number | "3"; | gene_type | " |
| Dt_chr12 | Cufflinks | exon | 3258659  | 3258817  | . | - | . | gene_id | "XLOC_154587"; | transcript_id | "Novel_002130"; | exon_number | "4"; | gene_type | " |
| Dt_chr12 | Cufflinks | exon | 3254705  | 3256825  | . | - | . | gene_id | "XLOC_154587"; | transcript_id | "Novel_002131"; | exon_number | "1"; | gene_type | " |
| Dt_chr12 | Cufflinks | exon | 3258251  | 3258331  | . | - | . | gene_id | "XLOC_154587"; | transcript_id | "Novel_002131"; | exon_number | "2"; | gene_type | " |
| Dt_chr12 | Cufflinks | exon | 3258449  | 3258793  | . | - | . | gene_id | "XLOC_154587"; | transcript_id | "Novel_002131"; | exon_number | "3"; | gene_type | " |
| Dt_chr12 | Cufflinks | exon | 3258098  | 3258331  | . | - | . | gene_id | "XLOC_154587"; | transcript_id | "Novel_002132"; | exon_number | "1"; | gene_type | " |
| Dt_chr12 | Cufflinks | exon | 3258449  | 3258787  | . | - | . | gene_id | "XLOC_154587"; | transcript_id | "Novel_002132"; | exon_number | "2"; | gene_type | " |
| Dt_chr12 | Cufflinks | exon | 3258098  | 3258331  | . | - | . | gene_id | "XLOC_154587"; | transcript_id | "Novel_002133"; | exon_number | "1"; | gene_type | " |
| Dt_chr12 | Cufflinks | exon | 3258449  | 3258554  | . | - | . | gene_id | "XLOC_154587"; | transcript_id | "Novel_002133"; | exon_number | "2"; | gene_type | " |
| Dt_chr12 | Cufflinks | exon | 3258659  | 3258800  | . | - | . | gene_id | "XLOC_154587"; | transcript_id | "Novel_002133"; | exon_number | "3"; | gene_type | " |
| Dt_chr12 | Cufflinks | exon | 3360058  | 3360965  | . | - | . | gene_id | "XLOC_154601"; | transcript_id | "Novel_002134"; | exon_number | "1"; | gene_type | " |
| Dt_chr12 | Cufflinks | exon | 3361045  | 3361152  | . | - | . | gene_id | "XLOC_154601"; | transcript_id | "Novel_002134"; | exon_number | "2"; | gene_type | " |

|          |           |      |         |         |   |   |         |                |               |                 |             |      |           |   |
|----------|-----------|------|---------|---------|---|---|---------|----------------|---------------|-----------------|-------------|------|-----------|---|
| Dt_chr12 | Cufflinks | exon | 3361615 | 3361765 | . | . | gene_id | "XLOC_154601"; | transcript_id | "Novel_002134"; | exon_number | "3"; | gene_type | " |
| Dt_chr12 | Cufflinks | exon | 3360279 | 3360965 | . | . | gene_id | "XLOC_154601"; | transcript_id | "Novel_002135"; | exon_number | "1"; | gene_type | " |
| Dt_chr12 | Cufflinks | exon | 3361045 | 3361152 | . | . | gene_id | "XLOC_154601"; | transcript_id | "Novel_002135"; | exon_number | "2"; | gene_type | " |
| Dt_chr12 | Cufflinks | exon | 3361615 | 3361729 | . | . | gene_id | "XLOC_154601"; | transcript_id | "Novel_002135"; | exon_number | "3"; | gene_type | " |
| Dt_chr12 | Cufflinks | exon | 3362430 | 3362605 | . | . | gene_id | "XLOC_154601"; | transcript_id | "Novel_002135"; | exon_number | "4"; | gene_type | " |
| Dt_chr12 | Cufflinks | exon | 3764136 | 3765667 | . | . | gene_id | "XLOC_154657"; | transcript_id | "Novel_002136"; | exon_number | "1"; | gene_type | " |
| Dt_chr12 | Cufflinks | exon | 3766584 | 3766997 | . | . | gene_id | "XLOC_154657"; | transcript_id | "Novel_002136"; | exon_number | "2"; | gene_type | " |
| Dt_chr12 | Cufflinks | exon | 4141421 | 4142278 | . | . | gene_id | "XLOC_154695"; | transcript_id | "Novel_002137"; | exon_number | "1"; | gene_type | " |
| Dt_chr12 | Cufflinks | exon | 4144370 | 4144459 | . | . | gene_id | "XLOC_154695"; | transcript_id | "Novel_002137"; | exon_number | "2"; | gene_type | " |
| Dt_chr12 | Cufflinks | exon | 4144774 | 4144898 | . | . | gene_id | "XLOC_154695"; | transcript_id | "Novel_002137"; | exon_number | "3"; | gene_type | " |
| Dt_chr12 | Cufflinks | exon | 4523472 | 4524603 | . | . | gene_id | "XLOC_154783"; | transcript_id | "Novel_002138"; | exon_number | "1"; | gene_type | " |
| Dt_chr12 | Cufflinks | exon | 4525289 | 4525361 | . | . | gene_id | "XLOC_154783"; | transcript_id | "Novel_002138"; | exon_number | "2"; | gene_type | " |
| Dt_chr12 | Cufflinks | exon | 4525584 | 4525679 | . | . | gene_id | "XLOC_154783"; | transcript_id | "Novel_002138"; | exon_number | "3"; | gene_type | " |
| Dt_chr12 | Cufflinks | exon | 4525925 | 4525988 | . | . | gene_id | "XLOC_154783"; | transcript_id | "Novel_002138"; | exon_number | "4"; | gene_type | " |
| Dt_chr12 | Cufflinks | exon | 4526688 | 4526739 | . | . | gene_id | "XLOC_154783"; | transcript_id | "Novel_002138"; | exon_number | "5"; | gene_type | " |
| Dt_chr12 | Cufflinks | exon | 4527282 | 4527379 | . | . | gene_id | "XLOC_154783"; | transcript_id | "Novel_002138"; | exon_number | "6"; | gene_type | " |
| Dt_chr12 | Cufflinks | exon | 4527467 | 4527525 | . | . | gene_id | "XLOC_154783"; | transcript_id | "Novel_002138"; | exon_number | "7"; | gene_type | " |
| Dt_chr12 | Cufflinks | exon | 4527769 | 4528280 | . | . | gene_id | "XLOC_154783"; | transcript_id | "Novel_002138"; | exon_number | "8"; | gene_type | " |
| Dt_chr12 | Cufflinks | exon | 4681334 | 4682299 | . | . | gene_id | "XLOC_154804"; | transcript_id | "Novel_002139"; | exon_number | "1"; | gene_type | " |
| Dt_chr12 | Cufflinks | exon | 5280594 | 5280930 | . | . | gene_id | "XLOC_154876"; | transcript_id | "Novel_002140"; | exon_number | "1"; | gene_type | " |
| Dt_chr12 | Cufflinks | exon | 5281005 | 5281132 | . | . | gene_id | "XLOC_154876"; | transcript_id | "Novel_002140"; | exon_number | "2"; | gene_type | " |
| Dt_chr12 | Cufflinks | exon | 7024497 | 7024671 | . | . | gene_id | "XLOC_155094"; | transcript_id | "Novel_002141"; | exon_number | "1"; | gene_type | " |
| Dt_chr12 | Cufflinks | exon | 7024817 | 7024882 | . | . | gene_id | "XLOC_155094"; | transcript_id | "Novel_002141"; | exon_number | "2"; | gene_type | " |
| Dt_chr12 | Cufflinks | exon | 7025022 | 7025070 | . | . | gene_id | "XLOC_155094"; | transcript_id | "Novel_002141"; | exon_number | "3"; | gene_type | " |
| Dt_chr12 | Cufflinks | exon | 7025252 | 7025308 | . | . | gene_id | "XLOC_155094"; | transcript_id | "Novel_002141"; | exon_number | "4"; | gene_type | " |
| Dt_chr12 | Cufflinks | exon | 8328643 | 8328832 | . | . | gene_id | "XLOC_155214"; | transcript_id | "Novel_002142"; | exon_number | "1"; | gene_type | " |
| Dt_chr12 | Cufflinks | exon | 8329680 | 8329809 | . | . | gene_id | "XLOC_155214"; | transcript_id | "Novel_002142"; | exon_number | "2"; | gene_type | " |
| Dt_chr12 | Cufflinks | exon | 8331287 | 8331595 | . | . | gene_id | "XLOC_155214"; | transcript_id | "Novel_002142"; | exon_number | "3"; | gene_type | " |
| Dt_chr12 | Cufflinks | exon | 8329254 | 8329443 | . | . | gene_id | "XLOC_155214"; | transcript_id | "Novel_002143"; | exon_number | "1"; | gene_type | " |
| Dt_chr12 | Cufflinks | exon | 8329680 | 8329809 | . | . | gene_id | "XLOC_155214"; | transcript_id | "Novel_002143"; | exon_number | "2"; | gene_type | " |
| Dt_chr12 | Cufflinks | exon | 8331287 | 8331595 | . | . | gene_id | "XLOC_155214"; | transcript_id | "Novel_002143"; | exon_number | "3"; | gene_type | " |
| Dt_chr12 | Cufflinks | exon | 8543668 | 8544269 | . | . | gene_id | "XLOC_155243"; | transcript_id | "Novel_002144"; | exon_number | "1"; | gene_type | " |
| Dt_chr12 | Cufflinks | exon | 8544365 | 8544513 | . | . | gene_id | "XLOC_155243"; | transcript_id | "Novel_002144"; | exon_number | "2"; | gene_type | " |
| Dt_chr12 | Cufflinks | exon | 8544611 | 8544696 | . | . | gene_id | "XLOC_155243"; | transcript_id | "Novel_002144"; | exon_number | "3"; | gene_type | " |
| Dt_chr12 | Cufflinks | exon | 8544797 | 8545812 | . | . | gene_id | "XLOC_155243"; | transcript_id | "Novel_002144"; | exon_number | "4"; | gene_type | " |

|          |           |      |          |          |   |   |         |                |               |                 |             |      |           |   |
|----------|-----------|------|----------|----------|---|---|---------|----------------|---------------|-----------------|-------------|------|-----------|---|
| Dt_chr12 | Cufflinks | exon | 9286614  | 9286659  | . | . | gene_id | "XLOC_155316"; | transcript_id | "Novel_002145"; | exon_number | "1"; | gene_type | " |
| Dt_chr12 | Cufflinks | exon | 9287279  | 9287561  | . | . | gene_id | "XLOC_155316"; | transcript_id | "Novel_002145"; | exon_number | "2"; | gene_type | " |
| Dt_chr12 | Cufflinks | exon | 10178649 | 10179401 | . | . | gene_id | "XLOC_155397"; | transcript_id | "Novel_002146"; | exon_number | "1"; | gene_type | " |
| Dt_chr12 | Cufflinks | exon | 10179529 | 10179996 | . | . | gene_id | "XLOC_155397"; | transcript_id | "Novel_002146"; | exon_number | "2"; | gene_type | " |
| Dt_chr12 | Cufflinks | exon | 10656161 | 10657099 | . | . | gene_id | "XLOC_155471"; | transcript_id | "Novel_002147"; | exon_number | "1"; | gene_type | " |
| Dt_chr12 | Cufflinks | exon | 10657197 | 10657309 | . | . | gene_id | "XLOC_155471"; | transcript_id | "Novel_002147"; | exon_number | "2"; | gene_type | " |
| Dt_chr12 | Cufflinks | exon | 12862611 | 12862836 | . | . | gene_id | "XLOC_155732"; | transcript_id | "Novel_002148"; | exon_number | "1"; | gene_type | " |
| Dt_chr12 | Cufflinks | exon | 12863079 | 12863163 | . | . | gene_id | "XLOC_155732"; | transcript_id | "Novel_002148"; | exon_number | "2"; | gene_type | " |
| Dt_chr12 | Cufflinks | exon | 12863287 | 12863379 | . | . | gene_id | "XLOC_155732"; | transcript_id | "Novel_002148"; | exon_number | "3"; | gene_type | " |
| Dt_chr12 | Cufflinks | exon | 12863517 | 12863616 | . | . | gene_id | "XLOC_155732"; | transcript_id | "Novel_002148"; | exon_number | "4"; | gene_type | " |
| Dt_chr12 | Cufflinks | exon | 12865727 | 12866016 | . | . | gene_id | "XLOC_155732"; | transcript_id | "Novel_002148"; | exon_number | "5"; | gene_type | " |
| Dt_chr12 | Cufflinks | exon | 12862972 | 12863379 | . | . | gene_id | "XLOC_155732"; | transcript_id | "Novel_002149"; | exon_number | "1"; | gene_type | " |
| Dt_chr12 | Cufflinks | exon | 12863517 | 12863616 | . | . | gene_id | "XLOC_155732"; | transcript_id | "Novel_002149"; | exon_number | "2"; | gene_type | " |
| Dt_chr12 | Cufflinks | exon | 12865727 | 12865890 | . | . | gene_id | "XLOC_155732"; | transcript_id | "Novel_002149"; | exon_number | "3"; | gene_type | " |
| Dt_chr12 | Cufflinks | exon | 15458340 | 15458595 | . | . | gene_id | "XLOC_155885"; | transcript_id | "Novel_002150"; | exon_number | "1"; | gene_type | " |
| Dt_chr12 | Cufflinks | exon | 15459581 | 15459684 | . | . | gene_id | "XLOC_155885"; | transcript_id | "Novel_002150"; | exon_number | "2"; | gene_type | " |
| Dt_chr12 | Cufflinks | exon | 15459809 | 15460222 | . | . | gene_id | "XLOC_155885"; | transcript_id | "Novel_002150"; | exon_number | "3"; | gene_type | " |
| Dt_chr12 | Cufflinks | exon | 15471236 | 15474604 | . | . | gene_id | "XLOC_155892"; | transcript_id | "Novel_002151"; | exon_number | "1"; | gene_type | " |
| Dt_chr12 | Cufflinks | exon | 15477083 | 15477315 | . | . | gene_id | "XLOC_155892"; | transcript_id | "Novel_002151"; | exon_number | "2"; | gene_type | " |
| Dt_chr12 | Cufflinks | exon | 16980380 | 16982454 | . | . | gene_id | "XLOC_156005"; | transcript_id | "Novel_002152"; | exon_number | "1"; | gene_type | " |
| Dt_chr12 | Cufflinks | exon | 17407899 | 17410319 | . | . | gene_id | "XLOC_156040"; | transcript_id | "Novel_002153"; | exon_number | "1"; | gene_type | " |
| Dt_chr12 | Cufflinks | exon | 17411234 | 17411278 | . | . | gene_id | "XLOC_156040"; | transcript_id | "Novel_002153"; | exon_number | "2"; | gene_type | " |
| Dt_chr12 | Cufflinks | exon | 17412593 | 17412743 | . | . | gene_id | "XLOC_156040"; | transcript_id | "Novel_002153"; | exon_number | "3"; | gene_type | " |
| Dt_chr12 | Cufflinks | exon | 17953842 | 17954364 | . | . | gene_id | "XLOC_156087"; | transcript_id | "Novel_002154"; | exon_number | "1"; | gene_type | " |
| Dt_chr12 | Cufflinks | exon | 17954742 | 17954803 | . | . | gene_id | "XLOC_156087"; | transcript_id | "Novel_002154"; | exon_number | "2"; | gene_type | " |
| Dt_chr12 | Cufflinks | exon | 17955112 | 17955381 | . | . | gene_id | "XLOC_156087"; | transcript_id | "Novel_002154"; | exon_number | "3"; | gene_type | " |
| Dt_chr12 | Cufflinks | exon | 18726978 | 18727077 | . | . | gene_id | "XLOC_156114"; | transcript_id | "Novel_002155"; | exon_number | "1"; | gene_type | " |
| Dt_chr12 | Cufflinks | exon | 18727234 | 18727722 | . | . | gene_id | "XLOC_156114"; | transcript_id | "Novel_002155"; | exon_number | "2"; | gene_type | " |
| Dt_chr12 | Cufflinks | exon | 24213659 | 24213868 | . | . | gene_id | "XLOC_156403"; | transcript_id | "Novel_002156"; | exon_number | "1"; | gene_type | " |
| Dt_chr12 | Cufflinks | exon | 28942910 | 28944054 | . | . | gene_id | "XLOC_156710"; | transcript_id | "Novel_002157"; | exon_number | "1"; | gene_type | " |
| Dt_chr12 | Cufflinks | exon | 28944957 | 28945038 | . | . | gene_id | "XLOC_156710"; | transcript_id | "Novel_002157"; | exon_number | "2"; | gene_type | " |
| Dt_chr12 | Cufflinks | exon | 28945154 | 28945228 | . | . | gene_id | "XLOC_156710"; | transcript_id | "Novel_002157"; | exon_number | "3"; | gene_type | " |
| Dt_chr12 | Cufflinks | exon | 28945998 | 28946086 | . | . | gene_id | "XLOC_156710"; | transcript_id | "Novel_002157"; | exon_number | "4"; | gene_type | " |
| Dt_chr12 | Cufflinks | exon | 29080335 | 29081131 | . | . | gene_id | "XLOC_156733"; | transcript_id | "Novel_002158"; | exon_number | "1"; | gene_type | " |
| Dt_chr12 | Cufflinks | exon | 29081225 | 29081767 | . | . | gene_id | "XLOC_156733"; | transcript_id | "Novel_002158"; | exon_number | "2"; | gene_type | " |





|          |           |      |          |          |   |   |   |         |                |               |                 |             |       |           |   |
|----------|-----------|------|----------|----------|---|---|---|---------|----------------|---------------|-----------------|-------------|-------|-----------|---|
| Dt_chr12 | Cufflinks | exon | 29339281 | 29339388 | . | - | . | gene_id | "XLOC_156772"; | transcript_id | "Novel_002164"; | exon_number | "2";  | gene_type | " |
| Dt_chr12 | Cufflinks | exon | 29339556 | 29339841 | . | - | . | gene_id | "XLOC_156772"; | transcript_id | "Novel_002164"; | exon_number | "3";  | gene_type | " |
| Dt_chr12 | Cufflinks | exon | 29339923 | 29340825 | . | - | . | gene_id | "XLOC_156772"; | transcript_id | "Novel_002164"; | exon_number | "4";  | gene_type | " |
| Dt_chr12 | Cufflinks | exon | 31163554 | 31165955 | . | - | . | gene_id | "XLOC_156949"; | transcript_id | "Novel_002165"; | exon_number | "1";  | gene_type | " |
| Dt_chr12 | Cufflinks | exon | 31166219 | 31166450 | . | - | . | gene_id | "XLOC_156949"; | transcript_id | "Novel_002165"; | exon_number | "2";  | gene_type | " |
| Dt_chr12 | Cufflinks | exon | 31164232 | 31165150 | . | - | . | gene_id | "XLOC_156949"; | transcript_id | "Novel_002166"; | exon_number | "1";  | gene_type | " |
| Dt_chr12 | Cufflinks | exon | 31165870 | 31165955 | . | - | . | gene_id | "XLOC_156949"; | transcript_id | "Novel_002166"; | exon_number | "2";  | gene_type | " |
| Dt_chr12 | Cufflinks | exon | 31166219 | 31166394 | . | - | . | gene_id | "XLOC_156949"; | transcript_id | "Novel_002166"; | exon_number | "3";  | gene_type | " |
| Dt_chr12 | Cufflinks | exon | 31536708 | 31537817 | . | - | . | gene_id | "XLOC_156978"; | transcript_id | "Novel_002167"; | exon_number | "1";  | gene_type | " |
| Dt_chr12 | Cufflinks | exon | 31538642 | 31538734 | . | - | . | gene_id | "XLOC_156978"; | transcript_id | "Novel_002167"; | exon_number | "2";  | gene_type | " |
| Dt_chr12 | Cufflinks | exon | 31538822 | 31538927 | . | - | . | gene_id | "XLOC_156978"; | transcript_id | "Novel_002167"; | exon_number | "3";  | gene_type | " |
| Dt_chr12 | Cufflinks | exon | 31539100 | 31539187 | . | - | . | gene_id | "XLOC_156978"; | transcript_id | "Novel_002167"; | exon_number | "4";  | gene_type | " |
| Dt_chr12 | Cufflinks | exon | 31539286 | 31539382 | . | - | . | gene_id | "XLOC_156978"; | transcript_id | "Novel_002167"; | exon_number | "5";  | gene_type | " |
| Dt_chr12 | Cufflinks | exon | 31539949 | 31540032 | . | - | . | gene_id | "XLOC_156978"; | transcript_id | "Novel_002167"; | exon_number | "6";  | gene_type | " |
| Dt_chr12 | Cufflinks | exon | 31540175 | 31540262 | . | - | . | gene_id | "XLOC_156978"; | transcript_id | "Novel_002167"; | exon_number | "7";  | gene_type | " |
| Dt_chr12 | Cufflinks | exon | 31540922 | 31541015 | . | - | . | gene_id | "XLOC_156978"; | transcript_id | "Novel_002167"; | exon_number | "8";  | gene_type | " |
| Dt_chr12 | Cufflinks | exon | 31541104 | 31541212 | . | - | . | gene_id | "XLOC_156978"; | transcript_id | "Novel_002167"; | exon_number | "9";  | gene_type | " |
| Dt_chr12 | Cufflinks | exon | 31541300 | 31541885 | . | - | . | gene_id | "XLOC_156978"; | transcript_id | "Novel_002167"; | exon_number | "10"; | gene_type | " |
| Dt_chr12 | Cufflinks | exon | 31536771 | 31537817 | . | - | . | gene_id | "XLOC_156978"; | transcript_id | "Novel_002168"; | exon_number | "1";  | gene_type | " |
| Dt_chr12 | Cufflinks | exon | 31538642 | 31538734 | . | - | . | gene_id | "XLOC_156978"; | transcript_id | "Novel_002168"; | exon_number | "2";  | gene_type | " |
| Dt_chr12 | Cufflinks | exon | 31538822 | 31538927 | . | - | . | gene_id | "XLOC_156978"; | transcript_id | "Novel_002168"; | exon_number | "3";  | gene_type | " |
| Dt_chr12 | Cufflinks | exon | 31539100 | 31539187 | . | - | . | gene_id | "XLOC_156978"; | transcript_id | "Novel_002168"; | exon_number | "4";  | gene_type | " |
| Dt_chr12 | Cufflinks | exon | 31539286 | 31539382 | . | - | . | gene_id | "XLOC_156978"; | transcript_id | "Novel_002168"; | exon_number | "5";  | gene_type | " |
| Dt_chr12 | Cufflinks | exon | 31539949 | 31540032 | . | - | . | gene_id | "XLOC_156978"; | transcript_id | "Novel_002168"; | exon_number | "6";  | gene_type | " |
| Dt_chr12 | Cufflinks | exon | 31540175 | 31540262 | . | - | . | gene_id | "XLOC_156978"; | transcript_id | "Novel_002168"; | exon_number | "7";  | gene_type | " |
| Dt_chr12 | Cufflinks | exon | 31540922 | 31541015 | . | - | . | gene_id | "XLOC_156978"; | transcript_id | "Novel_002168"; | exon_number | "8";  | gene_type | " |
| Dt_chr12 | Cufflinks | exon | 31541104 | 31541212 | . | - | . | gene_id | "XLOC_156978"; | transcript_id | "Novel_002168"; | exon_number | "9";  | gene_type | " |
| Dt_chr12 | Cufflinks | exon | 31541300 | 31541604 | . | - | . | gene_id | "XLOC_156978"; | transcript_id | "Novel_002168"; | exon_number | "10"; | gene_type | " |
| Dt_chr12 | Cufflinks | exon | 31542060 | 31542550 | . | - | . | gene_id | "XLOC_156978"; | transcript_id | "Novel_002168"; | exon_number | "11"; | gene_type | " |
| Dt_chr12 | Cufflinks | exon | 36915086 | 36918542 | . | - | . | gene_id | "XLOC_157259"; | transcript_id | "Novel_002169"; | exon_number | "1";  | gene_type | " |
| Dt_chr12 | Cufflinks | exon | 36924304 | 36924522 | . | - | . | gene_id | "XLOC_157259"; | transcript_id | "Novel_002169"; | exon_number | "2";  | gene_type | " |
| Dt_chr13 | Cufflinks | exon | 1487276  | 1487512  | . | + | . | gene_id | "XLOC_157503"; | transcript_id | "Novel_002170"; | exon_number | "1";  | gene_type | " |
| Dt_chr13 | Cufflinks | exon | 3606060  | 3606755  | . | + | . | gene_id | "XLOC_157584"; | transcript_id | "Novel_002171"; | exon_number | "1";  | gene_type | " |
| Dt_chr13 | Cufflinks | exon | 3607042  | 3607081  | . | + | . | gene_id | "XLOC_157584"; | transcript_id | "Novel_002171"; | exon_number | "2";  | gene_type | " |
| Dt_chr13 | Cufflinks | exon | 3607211  | 3607750  | . | + | . | gene_id | "XLOC_157584"; | transcript_id | "Novel_002171"; | exon_number | "3";  | gene_type | " |



|          |           |      |          |          |   |   |   |         |                |               |                 |             |      |           |   |
|----------|-----------|------|----------|----------|---|---|---|---------|----------------|---------------|-----------------|-------------|------|-----------|---|
| Dt_chr13 | Cufflinks | exon | 16655789 | 16655916 | . | + | . | gene_id | "XLOC_158440"; | transcript_id | "Novel_002181"; | exon_number | "2"; | gene_type | " |
| Dt_chr13 | Cufflinks | exon | 16656058 | 16656300 | . | + | . | gene_id | "XLOC_158440"; | transcript_id | "Novel_002181"; | exon_number | "3"; | gene_type | " |
| Dt_chr13 | Cufflinks | exon | 16656421 | 16656673 | . | + | . | gene_id | "XLOC_158440"; | transcript_id | "Novel_002181"; | exon_number | "4"; | gene_type | " |
| Dt_chr13 | Cufflinks | exon | 16659689 | 16660273 | . | + | . | gene_id | "XLOC_158440"; | transcript_id | "Novel_002181"; | exon_number | "5"; | gene_type | " |
| Dt_chr13 | Cufflinks | exon | 16720388 | 16720616 | . | + | . | gene_id | "XLOC_158453"; | transcript_id | "Novel_002182"; | exon_number | "1"; | gene_type | " |
| Dt_chr13 | Cufflinks | exon | 16720957 | 16721029 | . | + | . | gene_id | "XLOC_158453"; | transcript_id | "Novel_002182"; | exon_number | "2"; | gene_type | " |
| Dt_chr13 | Cufflinks | exon | 16721356 | 16721383 | . | + | . | gene_id | "XLOC_158453"; | transcript_id | "Novel_002182"; | exon_number | "3"; | gene_type | " |
| Dt_chr13 | Cufflinks | exon | 18158900 | 18159257 | . | + | . | gene_id | "XLOC_158596"; | transcript_id | "Novel_002183"; | exon_number | "1"; | gene_type | " |
| Dt_chr13 | Cufflinks | exon | 19707101 | 19707528 | . | + | . | gene_id | "XLOC_158784"; | transcript_id | "Novel_002184"; | exon_number | "1"; | gene_type | " |
| Dt_chr13 | Cufflinks | exon | 19709302 | 19709416 | . | + | . | gene_id | "XLOC_158784"; | transcript_id | "Novel_002184"; | exon_number | "2"; | gene_type | " |
| Dt_chr13 | Cufflinks | exon | 19709510 | 19709591 | . | + | . | gene_id | "XLOC_158784"; | transcript_id | "Novel_002184"; | exon_number | "3"; | gene_type | " |
| Dt_chr13 | Cufflinks | exon | 19709801 | 19709878 | . | + | . | gene_id | "XLOC_158784"; | transcript_id | "Novel_002184"; | exon_number | "4"; | gene_type | " |
| Dt_chr13 | Cufflinks | exon | 19710069 | 19710939 | . | + | . | gene_id | "XLOC_158784"; | transcript_id | "Novel_002184"; | exon_number | "5"; | gene_type | " |
| Dt_chr13 | Cufflinks | exon | 19707102 | 19707528 | . | + | . | gene_id | "XLOC_158784"; | transcript_id | "Novel_002185"; | exon_number | "1"; | gene_type | " |
| Dt_chr13 | Cufflinks | exon | 19709302 | 19709416 | . | + | . | gene_id | "XLOC_158784"; | transcript_id | "Novel_002185"; | exon_number | "2"; | gene_type | " |
| Dt_chr13 | Cufflinks | exon | 19709510 | 19709591 | . | + | . | gene_id | "XLOC_158784"; | transcript_id | "Novel_002185"; | exon_number | "3"; | gene_type | " |
| Dt_chr13 | Cufflinks | exon | 19709827 | 19709878 | . | + | . | gene_id | "XLOC_158784"; | transcript_id | "Novel_002185"; | exon_number | "4"; | gene_type | " |
| Dt_chr13 | Cufflinks | exon | 19710069 | 19711454 | . | + | . | gene_id | "XLOC_158784"; | transcript_id | "Novel_002185"; | exon_number | "5"; | gene_type | " |
| Dt_chr13 | Cufflinks | exon | 22038220 | 22038566 | . | + | . | gene_id | "XLOC_159043"; | transcript_id | "Novel_002186"; | exon_number | "1"; | gene_type | " |
| Dt_chr13 | Cufflinks | exon | 22040415 | 22040859 | . | + | . | gene_id | "XLOC_159043"; | transcript_id | "Novel_002186"; | exon_number | "2"; | gene_type | " |
| Dt_chr13 | Cufflinks | exon | 22854689 | 22855118 | . | + | . | gene_id | "XLOC_159188"; | transcript_id | "Novel_002187"; | exon_number | "1"; | gene_type | " |
| Dt_chr13 | Cufflinks | exon | 22855373 | 22855847 | . | + | . | gene_id | "XLOC_159188"; | transcript_id | "Novel_002187"; | exon_number | "2"; | gene_type | " |
| Dt_chr13 | Cufflinks | exon | 22856178 | 22856336 | . | + | . | gene_id | "XLOC_159188"; | transcript_id | "Novel_002187"; | exon_number | "3"; | gene_type | " |
| Dt_chr13 | Cufflinks | exon | 22854717 | 22855118 | . | + | . | gene_id | "XLOC_159188"; | transcript_id | "Novel_002188"; | exon_number | "1"; | gene_type | " |
| Dt_chr13 | Cufflinks | exon | 22855373 | 22855963 | . | + | . | gene_id | "XLOC_159188"; | transcript_id | "Novel_002188"; | exon_number | "2"; | gene_type | " |
| Dt_chr13 | Cufflinks | exon | 22854717 | 22855118 | . | + | . | gene_id | "XLOC_159188"; | transcript_id | "Novel_002189"; | exon_number | "1"; | gene_type | " |
| Dt_chr13 | Cufflinks | exon | 22855373 | 22855847 | . | + | . | gene_id | "XLOC_159188"; | transcript_id | "Novel_002189"; | exon_number | "2"; | gene_type | " |
| Dt_chr13 | Cufflinks | exon | 22857780 | 22857835 | . | + | . | gene_id | "XLOC_159188"; | transcript_id | "Novel_002189"; | exon_number | "3"; | gene_type | " |
| Dt_chr13 | Cufflinks | exon | 22857915 | 22858045 | . | + | . | gene_id | "XLOC_159188"; | transcript_id | "Novel_002189"; | exon_number | "4"; | gene_type | " |
| Dt_chr13 | Cufflinks | exon | 22858135 | 22858231 | . | + | . | gene_id | "XLOC_159188"; | transcript_id | "Novel_002189"; | exon_number | "5"; | gene_type | " |
| Dt_chr13 | Cufflinks | exon | 22858313 | 22858480 | . | + | . | gene_id | "XLOC_159188"; | transcript_id | "Novel_002189"; | exon_number | "6"; | gene_type | " |
| Dt_chr13 | Cufflinks | exon | 22859102 | 22859931 | . | + | . | gene_id | "XLOC_159188"; | transcript_id | "Novel_002189"; | exon_number | "7"; | gene_type | " |
| Dt_chr13 | Cufflinks | exon | 23258291 | 23258400 | . | + | . | gene_id | "XLOC_159280"; | transcript_id | "Novel_002190"; | exon_number | "1"; | gene_type | " |
| Dt_chr13 | Cufflinks | exon | 23258521 | 23258582 | . | + | . | gene_id | "XLOC_159280"; | transcript_id | "Novel_002190"; | exon_number | "2"; | gene_type | " |
| Dt_chr13 | Cufflinks | exon | 23259056 | 23259120 | . | + | . | gene_id | "XLOC_159280"; | transcript_id | "Novel_002190"; | exon_number | "3"; | gene_type | " |

|          |           |      |          |          |   |   |   |         |                |               |                 |             |      |           |   |
|----------|-----------|------|----------|----------|---|---|---|---------|----------------|---------------|-----------------|-------------|------|-----------|---|
| Dt_chr13 | Cufflinks | exon | 23259353 | 23261408 | . | + | . | gene_id | "XLOC_159280"; | transcript_id | "Novel_002190"; | exon_number | "4"; | gene_type | " |
| Dt_chr13 | Cufflinks | exon | 23258291 | 23258400 | . | + | . | gene_id | "XLOC_159280"; | transcript_id | "Novel_002191"; | exon_number | "1"; | gene_type | " |
| Dt_chr13 | Cufflinks | exon | 23258521 | 23258582 | . | + | . | gene_id | "XLOC_159280"; | transcript_id | "Novel_002191"; | exon_number | "2"; | gene_type | " |
| Dt_chr13 | Cufflinks | exon | 23259353 | 23259449 | . | + | . | gene_id | "XLOC_159280"; | transcript_id | "Novel_002191"; | exon_number | "3"; | gene_type | " |
| Dt_chr13 | Cufflinks | exon | 23260069 | 23261538 | . | + | . | gene_id | "XLOC_159280"; | transcript_id | "Novel_002191"; | exon_number | "4"; | gene_type | " |
| Dt_chr13 | Cufflinks | exon | 24385807 | 24391202 | . | + | . | gene_id | "XLOC_159389"; | transcript_id | "Novel_002192"; | exon_number | "1"; | gene_type | " |
| Dt_chr13 | Cufflinks | exon | 24401809 | 24401958 | . | + | . | gene_id | "XLOC_159389"; | transcript_id | "Novel_002192"; | exon_number | "2"; | gene_type | " |
| Dt_chr13 | Cufflinks | exon | 24385851 | 24391202 | . | + | . | gene_id | "XLOC_159389"; | transcript_id | "Novel_002193"; | exon_number | "1"; | gene_type | " |
| Dt_chr13 | Cufflinks | exon | 24391807 | 24391910 | . | + | . | gene_id | "XLOC_159389"; | transcript_id | "Novel_002193"; | exon_number | "2"; | gene_type | " |
| Dt_chr13 | Cufflinks | exon | 24392103 | 24392204 | . | + | . | gene_id | "XLOC_159389"; | transcript_id | "Novel_002193"; | exon_number | "3"; | gene_type | " |
| Dt_chr13 | Cufflinks | exon | 24581550 | 24581747 | . | + | . | gene_id | "XLOC_159435"; | transcript_id | "Novel_002194"; | exon_number | "1"; | gene_type | " |
| Dt_chr13 | Cufflinks | exon | 24582340 | 24583859 | . | + | . | gene_id | "XLOC_159435"; | transcript_id | "Novel_002194"; | exon_number | "2"; | gene_type | " |
| Dt_chr13 | Cufflinks | exon | 24635456 | 24635647 | . | + | . | gene_id | "XLOC_159440"; | transcript_id | "Novel_002195"; | exon_number | "1"; | gene_type | " |
| Dt_chr13 | Cufflinks | exon | 24635919 | 24636436 | . | + | . | gene_id | "XLOC_159440"; | transcript_id | "Novel_002195"; | exon_number | "2"; | gene_type | " |
| Dt_chr13 | Cufflinks | exon | 24962203 | 24963152 | . | + | . | gene_id | "XLOC_159452"; | transcript_id | "Novel_002196"; | exon_number | "1"; | gene_type | " |
| Dt_chr13 | Cufflinks | exon | 24963234 | 24963376 | . | + | . | gene_id | "XLOC_159452"; | transcript_id | "Novel_002196"; | exon_number | "2"; | gene_type | " |
| Dt_chr13 | Cufflinks | exon | 25938507 | 25939117 | . | + | . | gene_id | "XLOC_159496"; | transcript_id | "Novel_002197"; | exon_number | "1"; | gene_type | " |
| Dt_chr13 | Cufflinks | exon | 25939857 | 25939991 | . | + | . | gene_id | "XLOC_159496"; | transcript_id | "Novel_002197"; | exon_number | "2"; | gene_type | " |
| Dt_chr13 | Cufflinks | exon | 25940705 | 25940761 | . | + | . | gene_id | "XLOC_159496"; | transcript_id | "Novel_002197"; | exon_number | "3"; | gene_type | " |
| Dt_chr13 | Cufflinks | exon | 25940911 | 25941045 | . | + | . | gene_id | "XLOC_159496"; | transcript_id | "Novel_002197"; | exon_number | "4"; | gene_type | " |
| Dt_chr13 | Cufflinks | exon | 25941177 | 25941449 | . | + | . | gene_id | "XLOC_159496"; | transcript_id | "Novel_002197"; | exon_number | "5"; | gene_type | " |
| Dt_chr13 | Cufflinks | exon | 26349688 | 26349915 | . | + | . | gene_id | "XLOC_159513"; | transcript_id | "Novel_002198"; | exon_number | "1"; | gene_type | " |
| Dt_chr13 | Cufflinks | exon | 26762542 | 26762965 | . | + | . | gene_id | "XLOC_159533"; | transcript_id | "Novel_002199"; | exon_number | "1"; | gene_type | " |
| Dt_chr13 | Cufflinks | exon | 26763063 | 26763896 | . | + | . | gene_id | "XLOC_159533"; | transcript_id | "Novel_002199"; | exon_number | "2"; | gene_type | " |
| Dt_chr13 | Cufflinks | exon | 38507898 | 38508596 | . | + | . | gene_id | "XLOC_160201"; | transcript_id | "Novel_002200"; | exon_number | "1"; | gene_type | " |
| Dt_chr13 | Cufflinks | exon | 38508808 | 38508901 | . | + | . | gene_id | "XLOC_160201"; | transcript_id | "Novel_002200"; | exon_number | "2"; | gene_type | " |
| Dt_chr13 | Cufflinks | exon | 38509364 | 38509755 | . | + | . | gene_id | "XLOC_160201"; | transcript_id | "Novel_002200"; | exon_number | "3"; | gene_type | " |
| Dt_chr13 | Cufflinks | exon | 40132495 | 40132599 | . | + | . | gene_id | "XLOC_160292"; | transcript_id | "Novel_002201"; | exon_number | "1"; | gene_type | " |
| Dt_chr13 | Cufflinks | exon | 40134044 | 40134137 | . | + | . | gene_id | "XLOC_160292"; | transcript_id | "Novel_002201"; | exon_number | "2"; | gene_type | " |
| Dt_chr13 | Cufflinks | exon | 40134288 | 40134414 | . | + | . | gene_id | "XLOC_160292"; | transcript_id | "Novel_002201"; | exon_number | "3"; | gene_type | " |
| Dt_chr13 | Cufflinks | exon | 40134937 | 40135469 | . | + | . | gene_id | "XLOC_160292"; | transcript_id | "Novel_002201"; | exon_number | "4"; | gene_type | " |
| Dt_chr13 | Cufflinks | exon | 40135576 | 40136806 | . | + | . | gene_id | "XLOC_160292"; | transcript_id | "Novel_002201"; | exon_number | "5"; | gene_type | " |
| Dt_chr13 | Cufflinks | exon | 41669795 | 41671706 | . | + | . | gene_id | "XLOC_160358"; | transcript_id | "Novel_002202"; | exon_number | "1"; | gene_type | " |
| Dt_chr13 | Cufflinks | exon | 41671793 | 41673204 | . | + | . | gene_id | "XLOC_160358"; | transcript_id | "Novel_002202"; | exon_number | "2"; | gene_type | " |
| Dt_chr13 | Cufflinks | exon | 42469460 | 42469591 | . | + | . | gene_id | "XLOC_160452"; | transcript_id | "Novel_002203"; | exon_number | "1"; | gene_type | " |

|          |           |      |          |          |   |   |   |         |                |               |                 |             |      |           |   |
|----------|-----------|------|----------|----------|---|---|---|---------|----------------|---------------|-----------------|-------------|------|-----------|---|
| Dt_chr13 | Cufflinks | exon | 42469683 | 42469762 | . | + | . | gene_id | "XLOC_160452"; | transcript_id | "Novel_002203"; | exon_number | "2"; | gene_type | " |
| Dt_chr13 | Cufflinks | exon | 45957336 | 45957569 | . | + | . | gene_id | "XLOC_160716"; | transcript_id | "Novel_002204"; | exon_number | "1"; | gene_type | " |
| Dt_chr13 | Cufflinks | exon | 48447206 | 48447389 | . | + | . | gene_id | "XLOC_160862"; | transcript_id | "Novel_002205"; | exon_number | "1"; | gene_type | " |
| Dt_chr13 | Cufflinks | exon | 48447901 | 48448022 | . | + | . | gene_id | "XLOC_160862"; | transcript_id | "Novel_002205"; | exon_number | "2"; | gene_type | " |
| Dt_chr13 | Cufflinks | exon | 48448110 | 48448214 | . | + | . | gene_id | "XLOC_160862"; | transcript_id | "Novel_002205"; | exon_number | "3"; | gene_type | " |
| Dt_chr13 | Cufflinks | exon | 48448887 | 48449122 | . | + | . | gene_id | "XLOC_160862"; | transcript_id | "Novel_002205"; | exon_number | "4"; | gene_type | " |
| Dt_chr13 | Cufflinks | exon | 51629885 | 51629986 | . | + | . | gene_id | "XLOC_161178"; | transcript_id | "Novel_002206"; | exon_number | "1"; | gene_type | " |
| Dt_chr13 | Cufflinks | exon | 51630070 | 51630201 | . | + | . | gene_id | "XLOC_161178"; | transcript_id | "Novel_002206"; | exon_number | "2"; | gene_type | " |
| Dt_chr13 | Cufflinks | exon | 51630563 | 51630705 | . | + | . | gene_id | "XLOC_161178"; | transcript_id | "Novel_002206"; | exon_number | "3"; | gene_type | " |
| Dt_chr13 | Cufflinks | exon | 52280654 | 52284769 | . | + | . | gene_id | "XLOC_161253"; | transcript_id | "Novel_002207"; | exon_number | "1"; | gene_type | " |
| Dt_chr13 | Cufflinks | exon | 52285845 | 52286591 | . | + | . | gene_id | "XLOC_161253"; | transcript_id | "Novel_002207"; | exon_number | "2"; | gene_type | " |
| Dt_chr13 | Cufflinks | exon | 53234561 | 53234768 | . | + | . | gene_id | "XLOC_161345"; | transcript_id | "Novel_002208"; | exon_number | "1"; | gene_type | " |
| Dt_chr13 | Cufflinks | exon | 53235028 | 53235313 | . | + | . | gene_id | "XLOC_161345"; | transcript_id | "Novel_002208"; | exon_number | "2"; | gene_type | " |
| Dt_chr13 | Cufflinks | exon | 53235509 | 53235867 | . | + | . | gene_id | "XLOC_161345"; | transcript_id | "Novel_002208"; | exon_number | "3"; | gene_type | " |
| Dt_chr13 | Cufflinks | exon | 53235967 | 53236338 | . | + | . | gene_id | "XLOC_161345"; | transcript_id | "Novel_002208"; | exon_number | "4"; | gene_type | " |
| Dt_chr13 | Cufflinks | exon | 54175473 | 54175511 | . | + | . | gene_id | "XLOC_161463"; | transcript_id | "Novel_002209"; | exon_number | "1"; | gene_type | " |
| Dt_chr13 | Cufflinks | exon | 54176468 | 54176824 | . | + | . | gene_id | "XLOC_161463"; | transcript_id | "Novel_002209"; | exon_number | "2"; | gene_type | " |
| Dt_chr13 | Cufflinks | exon | 55179466 | 55179655 | . | + | . | gene_id | "XLOC_161614"; | transcript_id | "Novel_002210"; | exon_number | "1"; | gene_type | " |
| Dt_chr13 | Cufflinks | exon | 55179749 | 55179803 | . | + | . | gene_id | "XLOC_161614"; | transcript_id | "Novel_002210"; | exon_number | "2"; | gene_type | " |
| Dt_chr13 | Cufflinks | exon | 55180609 | 55180855 | . | + | . | gene_id | "XLOC_161614"; | transcript_id | "Novel_002210"; | exon_number | "3"; | gene_type | " |
| Dt_chr13 | Cufflinks | exon | 55181995 | 55182061 | . | + | . | gene_id | "XLOC_161616"; | transcript_id | "Novel_002211"; | exon_number | "1"; | gene_type | " |
| Dt_chr13 | Cufflinks | exon | 55182239 | 55182298 | . | + | . | gene_id | "XLOC_161616"; | transcript_id | "Novel_002211"; | exon_number | "2"; | gene_type | " |
| Dt_chr13 | Cufflinks | exon | 55182650 | 55182705 | . | + | . | gene_id | "XLOC_161616"; | transcript_id | "Novel_002211"; | exon_number | "3"; | gene_type | " |
| Dt_chr13 | Cufflinks | exon | 55182881 | 55182986 | . | + | . | gene_id | "XLOC_161616"; | transcript_id | "Novel_002211"; | exon_number | "4"; | gene_type | " |
| Dt_chr13 | Cufflinks | exon | 55183068 | 55183136 | . | + | . | gene_id | "XLOC_161616"; | transcript_id | "Novel_002211"; | exon_number | "5"; | gene_type | " |
| Dt_chr13 | Cufflinks | exon | 55183249 | 55183696 | . | + | . | gene_id | "XLOC_161616"; | transcript_id | "Novel_002211"; | exon_number | "6"; | gene_type | " |
| Dt_chr13 | Cufflinks | exon | 3361613  | 3363339  | . | - | . | gene_id | "XLOC_161893"; | transcript_id | "Novel_002212"; | exon_number | "1"; | gene_type | " |
| Dt_chr13 | Cufflinks | exon | 3363429  | 3363900  | . | - | . | gene_id | "XLOC_161893"; | transcript_id | "Novel_002212"; | exon_number | "2"; | gene_type | " |
| Dt_chr13 | Cufflinks | exon | 7079922  | 7080752  | . | - | . | gene_id | "XLOC_162035"; | transcript_id | "Novel_002213"; | exon_number | "1"; | gene_type | " |
| Dt_chr13 | Cufflinks | exon | 7080914  | 7081334  | . | - | . | gene_id | "XLOC_162035"; | transcript_id | "Novel_002213"; | exon_number | "2"; | gene_type | " |
| Dt_chr13 | Cufflinks | exon | 7995019  | 7995224  | . | - | . | gene_id | "XLOC_162133"; | transcript_id | "Novel_002214"; | exon_number | "1"; | gene_type | " |
| Dt_chr13 | Cufflinks | exon | 7995320  | 7995365  | . | - | . | gene_id | "XLOC_162133"; | transcript_id | "Novel_002214"; | exon_number | "2"; | gene_type | " |
| Dt_chr13 | Cufflinks | exon | 8352324  | 8352446  | . | - | . | gene_id | "XLOC_162168"; | transcript_id | "Novel_002215"; | exon_number | "1"; | gene_type | " |
| Dt_chr13 | Cufflinks | exon | 8352569  | 8352651  | . | - | . | gene_id | "XLOC_162168"; | transcript_id | "Novel_002215"; | exon_number | "2"; | gene_type | " |
| Dt_chr13 | Cufflinks | exon | 9577399  | 9577429  | . | - | . | gene_id | "XLOC_162292"; | transcript_id | "Novel_002216"; | exon_number | "1"; | gene_type | " |

|          |           |      |          |          |   |   |         |                |               |                 |             |      |           |   |
|----------|-----------|------|----------|----------|---|---|---------|----------------|---------------|-----------------|-------------|------|-----------|---|
| Dt_chr13 | Cufflinks | exon | 9577534  | 9577600  | . | . | gene_id | "XLOC_162292"; | transcript_id | "Novel_002216"; | exon_number | "2"; | gene_type | " |
| Dt_chr13 | Cufflinks | exon | 9577723  | 9577850  | . | . | gene_id | "XLOC_162292"; | transcript_id | "Novel_002216"; | exon_number | "3"; | gene_type | " |
| Dt_chr13 | Cufflinks | exon | 12777181 | 12777741 | . | . | gene_id | "XLOC_162489"; | transcript_id | "Novel_002217"; | exon_number | "1"; | gene_type | " |
| Dt_chr13 | Cufflinks | exon | 12777974 | 12779450 | . | . | gene_id | "XLOC_162489"; | transcript_id | "Novel_002217"; | exon_number | "2"; | gene_type | " |
| Dt_chr13 | Cufflinks | exon | 12779540 | 12779578 | . | . | gene_id | "XLOC_162489"; | transcript_id | "Novel_002217"; | exon_number | "3"; | gene_type | " |
| Dt_chr13 | Cufflinks | exon | 12779680 | 12779910 | . | . | gene_id | "XLOC_162489"; | transcript_id | "Novel_002217"; | exon_number | "4"; | gene_type | " |
| Dt_chr13 | Cufflinks | exon | 13150186 | 13150843 | . | . | gene_id | "XLOC_162531"; | transcript_id | "Novel_002218"; | exon_number | "1"; | gene_type | " |
| Dt_chr13 | Cufflinks | exon | 13154535 | 13154787 | . | . | gene_id | "XLOC_162531"; | transcript_id | "Novel_002218"; | exon_number | "2"; | gene_type | " |
| Dt_chr13 | Cufflinks | exon | 13551431 | 13551858 | . | . | gene_id | "XLOC_162575"; | transcript_id | "Novel_002219"; | exon_number | "1"; | gene_type | " |
| Dt_chr13 | Cufflinks | exon | 13551992 | 13552018 | . | . | gene_id | "XLOC_162575"; | transcript_id | "Novel_002219"; | exon_number | "2"; | gene_type | " |
| Dt_chr13 | Cufflinks | exon | 13552725 | 13552828 | . | . | gene_id | "XLOC_162575"; | transcript_id | "Novel_002219"; | exon_number | "3"; | gene_type | " |
| Dt_chr13 | Cufflinks | exon | 13553062 | 13554159 | . | . | gene_id | "XLOC_162575"; | transcript_id | "Novel_002219"; | exon_number | "4"; | gene_type | " |
| Dt_chr13 | Cufflinks | exon | 13951496 | 13952219 | . | . | gene_id | "XLOC_162596"; | transcript_id | "Novel_002220"; | exon_number | "1"; | gene_type | " |
| Dt_chr13 | Cufflinks | exon | 13952305 | 13952504 | . | . | gene_id | "XLOC_162596"; | transcript_id | "Novel_002220"; | exon_number | "2"; | gene_type | " |
| Dt_chr13 | Cufflinks | exon | 13952600 | 13952801 | . | . | gene_id | "XLOC_162596"; | transcript_id | "Novel_002220"; | exon_number | "3"; | gene_type | " |
| Dt_chr13 | Cufflinks | exon | 13953392 | 13955574 | . | . | gene_id | "XLOC_162596"; | transcript_id | "Novel_002220"; | exon_number | "4"; | gene_type | " |
| Dt_chr13 | Cufflinks | exon | 13989073 | 13989656 | . | . | gene_id | "XLOC_162612"; | transcript_id | "Novel_002221"; | exon_number | "1"; | gene_type | " |
| Dt_chr13 | Cufflinks | exon | 13990084 | 13990134 | . | . | gene_id | "XLOC_162612"; | transcript_id | "Novel_002221"; | exon_number | "2"; | gene_type | " |
| Dt_chr13 | Cufflinks | exon | 13991178 | 13991501 | . | . | gene_id | "XLOC_162612"; | transcript_id | "Novel_002221"; | exon_number | "3"; | gene_type | " |
| Dt_chr13 | Cufflinks | exon | 14250674 | 14252071 | . | . | gene_id | "XLOC_162645"; | transcript_id | "Novel_002222"; | exon_number | "1"; | gene_type | " |
| Dt_chr13 | Cufflinks | exon | 14252296 | 14252521 | . | . | gene_id | "XLOC_162645"; | transcript_id | "Novel_002222"; | exon_number | "2"; | gene_type | " |
| Dt_chr13 | Cufflinks | exon | 15111082 | 15112252 | . | . | gene_id | "XLOC_162718"; | transcript_id | "Novel_002223"; | exon_number | "1"; | gene_type | " |
| Dt_chr13 | Cufflinks | exon | 15112660 | 15113063 | . | . | gene_id | "XLOC_162718"; | transcript_id | "Novel_002223"; | exon_number | "2"; | gene_type | " |
| Dt_chr13 | Cufflinks | exon | 17038851 | 17039525 | . | . | gene_id | "XLOC_162869"; | transcript_id | "Novel_002224"; | exon_number | "1"; | gene_type | " |
| Dt_chr13 | Cufflinks | exon | 17040464 | 17040572 | . | . | gene_id | "XLOC_162869"; | transcript_id | "Novel_002224"; | exon_number | "2"; | gene_type | " |
| Dt_chr13 | Cufflinks | exon | 17041212 | 17041566 | . | . | gene_id | "XLOC_162869"; | transcript_id | "Novel_002224"; | exon_number | "3"; | gene_type | " |
| Dt_chr13 | Cufflinks | exon | 17039316 | 17040572 | . | . | gene_id | "XLOC_162869"; | transcript_id | "Novel_002225"; | exon_number | "1"; | gene_type | " |
| Dt_chr13 | Cufflinks | exon | 17041212 | 17041545 | . | . | gene_id | "XLOC_162869"; | transcript_id | "Novel_002225"; | exon_number | "2"; | gene_type | " |
| Dt_chr13 | Cufflinks | exon | 17897020 | 17898822 | . | . | gene_id | "XLOC_162942"; | transcript_id | "Novel_002226"; | exon_number | "1"; | gene_type | " |
| Dt_chr13 | Cufflinks | exon | 17898907 | 17901890 | . | . | gene_id | "XLOC_162942"; | transcript_id | "Novel_002226"; | exon_number | "2"; | gene_type | " |
| Dt_chr13 | Cufflinks | exon | 17897020 | 17897620 | . | . | gene_id | "XLOC_162942"; | transcript_id | "Novel_002227"; | exon_number | "1"; | gene_type | " |
| Dt_chr13 | Cufflinks | exon | 17898517 | 17898609 | . | . | gene_id | "XLOC_162942"; | transcript_id | "Novel_002227"; | exon_number | "2"; | gene_type | " |
| Dt_chr13 | Cufflinks | exon | 17898743 | 17901890 | . | . | gene_id | "XLOC_162942"; | transcript_id | "Novel_002227"; | exon_number | "3"; | gene_type | " |
| Dt_chr13 | Cufflinks | exon | 17897020 | 17897620 | . | . | gene_id | "XLOC_162942"; | transcript_id | "Novel_002228"; | exon_number | "1"; | gene_type | " |
| Dt_chr13 | Cufflinks | exon | 17898517 | 17898609 | . | . | gene_id | "XLOC_162942"; | transcript_id | "Novel_002228"; | exon_number | "2"; | gene_type | " |

|          |           |      |          |          |   |   |   |         |                |               |                 |             |      |           |   |
|----------|-----------|------|----------|----------|---|---|---|---------|----------------|---------------|-----------------|-------------|------|-----------|---|
| Dt_chr13 | Cufflinks | exon | 17898743 | 17898822 | . | - | . | gene_id | "XLOC_162942"; | transcript_id | "Novel_002228"; | exon_number | "3"; | gene_type | " |
| Dt_chr13 | Cufflinks | exon | 17898907 | 17901890 | . | - | . | gene_id | "XLOC_162942"; | transcript_id | "Novel_002228"; | exon_number | "4"; | gene_type | " |
| Dt_chr13 | Cufflinks | exon | 17897020 | 17897620 | . | - | . | gene_id | "XLOC_162942"; | transcript_id | "Novel_002229"; | exon_number | "1"; | gene_type | " |
| Dt_chr13 | Cufflinks | exon | 17898517 | 17901890 | . | - | . | gene_id | "XLOC_162942"; | transcript_id | "Novel_002229"; | exon_number | "2"; | gene_type | " |
| Dt_chr13 | Cufflinks | exon | 19466777 | 19469156 | . | - | . | gene_id | "XLOC_163122"; | transcript_id | "Novel_002230"; | exon_number | "1"; | gene_type | " |
| Dt_chr13 | Cufflinks | exon | 19471794 | 19472048 | . | - | . | gene_id | "XLOC_163122"; | transcript_id | "Novel_002230"; | exon_number | "2"; | gene_type | " |
| Dt_chr13 | Cufflinks | exon | 19731112 | 19731848 | . | - | . | gene_id | "XLOC_163162"; | transcript_id | "Novel_002231"; | exon_number | "1"; | gene_type | " |
| Dt_chr13 | Cufflinks | exon | 19733103 | 19733191 | . | - | . | gene_id | "XLOC_163162"; | transcript_id | "Novel_002231"; | exon_number | "2"; | gene_type | " |
| Dt_chr13 | Cufflinks | exon | 19733316 | 19733535 | . | - | . | gene_id | "XLOC_163162"; | transcript_id | "Novel_002231"; | exon_number | "3"; | gene_type | " |
| Dt_chr13 | Cufflinks | exon | 21088182 | 21088425 | . | - | . | gene_id | "XLOC_163266"; | transcript_id | "Novel_002232"; | exon_number | "1"; | gene_type | " |
| Dt_chr13 | Cufflinks | exon | 21088702 | 21088767 | . | - | . | gene_id | "XLOC_163266"; | transcript_id | "Novel_002232"; | exon_number | "2"; | gene_type | " |
| Dt_chr13 | Cufflinks | exon | 21089443 | 21089528 | . | - | . | gene_id | "XLOC_163266"; | transcript_id | "Novel_002232"; | exon_number | "3"; | gene_type | " |
| Dt_chr13 | Cufflinks | exon | 21090060 | 21090094 | . | - | . | gene_id | "XLOC_163266"; | transcript_id | "Novel_002232"; | exon_number | "4"; | gene_type | " |
| Dt_chr13 | Cufflinks | exon | 21090196 | 21090279 | . | - | . | gene_id | "XLOC_163266"; | transcript_id | "Novel_002232"; | exon_number | "5"; | gene_type | " |
| Dt_chr13 | Cufflinks | exon | 21090369 | 21090437 | . | - | . | gene_id | "XLOC_163266"; | transcript_id | "Novel_002232"; | exon_number | "6"; | gene_type | " |
| Dt_chr13 | Cufflinks | exon | 21091017 | 21091054 | . | - | . | gene_id | "XLOC_163266"; | transcript_id | "Novel_002232"; | exon_number | "7"; | gene_type | " |
| Dt_chr13 | Cufflinks | exon | 21091543 | 21091600 | . | - | . | gene_id | "XLOC_163266"; | transcript_id | "Novel_002232"; | exon_number | "8"; | gene_type | " |
| Dt_chr13 | Cufflinks | exon | 22050484 | 22050718 | . | - | . | gene_id | "XLOC_163422"; | transcript_id | "Novel_002233"; | exon_number | "1"; | gene_type | " |
| Dt_chr13 | Cufflinks | exon | 22051041 | 22051093 | . | - | . | gene_id | "XLOC_163422"; | transcript_id | "Novel_002233"; | exon_number | "2"; | gene_type | " |
| Dt_chr13 | Cufflinks | exon | 22052301 | 22052372 | . | - | . | gene_id | "XLOC_163422"; | transcript_id | "Novel_002233"; | exon_number | "3"; | gene_type | " |
| Dt_chr13 | Cufflinks | exon | 22052701 | 22052782 | . | - | . | gene_id | "XLOC_163422"; | transcript_id | "Novel_002233"; | exon_number | "4"; | gene_type | " |
| Dt_chr13 | Cufflinks | exon | 22052920 | 22053020 | . | - | . | gene_id | "XLOC_163422"; | transcript_id | "Novel_002233"; | exon_number | "5"; | gene_type | " |
| Dt_chr13 | Cufflinks | exon | 22053353 | 22053486 | . | - | . | gene_id | "XLOC_163422"; | transcript_id | "Novel_002233"; | exon_number | "6"; | gene_type | " |
| Dt_chr13 | Cufflinks | exon | 22571188 | 22572204 | . | - | . | gene_id | "XLOC_163499"; | transcript_id | "Novel_002234"; | exon_number | "1"; | gene_type | " |
| Dt_chr13 | Cufflinks | exon | 22572527 | 22572603 | . | - | . | gene_id | "XLOC_163499"; | transcript_id | "Novel_002234"; | exon_number | "2"; | gene_type | " |
| Dt_chr13 | Cufflinks | exon | 23231955 | 23232364 | . | - | . | gene_id | "XLOC_163585"; | transcript_id | "Novel_002235"; | exon_number | "1"; | gene_type | " |
| Dt_chr13 | Cufflinks | exon | 23410443 | 23410863 | . | - | . | gene_id | "XLOC_163607"; | transcript_id | "Novel_002236"; | exon_number | "1"; | gene_type | " |
| Dt_chr13 | Cufflinks | exon | 23411937 | 23412015 | . | - | . | gene_id | "XLOC_163607"; | transcript_id | "Novel_002236"; | exon_number | "2"; | gene_type | " |
| Dt_chr13 | Cufflinks | exon | 23412318 | 23412605 | . | - | . | gene_id | "XLOC_163607"; | transcript_id | "Novel_002236"; | exon_number | "3"; | gene_type | " |
| Dt_chr13 | Cufflinks | exon | 23410613 | 23412015 | . | - | . | gene_id | "XLOC_163607"; | transcript_id | "Novel_002237"; | exon_number | "1"; | gene_type | " |
| Dt_chr13 | Cufflinks | exon | 23412318 | 23412610 | . | - | . | gene_id | "XLOC_163607"; | transcript_id | "Novel_002237"; | exon_number | "2"; | gene_type | " |
| Dt_chr13 | Cufflinks | exon | 23736445 | 23738612 | . | - | . | gene_id | "XLOC_163638"; | transcript_id | "Novel_002238"; | exon_number | "1"; | gene_type | " |
| Dt_chr13 | Cufflinks | exon | 23749267 | 23749369 | . | - | . | gene_id | "XLOC_163638"; | transcript_id | "Novel_002238"; | exon_number | "2"; | gene_type | " |
| Dt_chr13 | Cufflinks | exon | 23750488 | 23750590 | . | - | . | gene_id | "XLOC_163638"; | transcript_id | "Novel_002238"; | exon_number | "3"; | gene_type | " |
| Dt_chr13 | Cufflinks | exon | 23750980 | 23751232 | . | - | . | gene_id | "XLOC_163638"; | transcript_id | "Novel_002238"; | exon_number | "4"; | gene_type | " |

|          |           |      |          |          |   |   |         |                |               |                 |             |       |           |   |
|----------|-----------|------|----------|----------|---|---|---------|----------------|---------------|-----------------|-------------|-------|-----------|---|
| Dt_chr13 | Cufflinks | exon | 23753571 | 23753686 | . | . | gene_id | "XLOC_163638"; | transcript_id | "Novel_002238"; | exon_number | "5";  | gene_type | " |
| Dt_chr13 | Cufflinks | exon | 23753772 | 23754024 | . | . | gene_id | "XLOC_163638"; | transcript_id | "Novel_002238"; | exon_number | "6";  | gene_type | " |
| Dt_chr13 | Cufflinks | exon | 23754124 | 23754358 | . | . | gene_id | "XLOC_163638"; | transcript_id | "Novel_002238"; | exon_number | "7";  | gene_type | " |
| Dt_chr13 | Cufflinks | exon | 23754433 | 23754508 | . | . | gene_id | "XLOC_163638"; | transcript_id | "Novel_002238"; | exon_number | "8";  | gene_type | " |
| Dt_chr13 | Cufflinks | exon | 23754615 | 23754673 | . | . | gene_id | "XLOC_163638"; | transcript_id | "Novel_002238"; | exon_number | "9";  | gene_type | " |
| Dt_chr13 | Cufflinks | exon | 23754758 | 23754824 | . | . | gene_id | "XLOC_163638"; | transcript_id | "Novel_002238"; | exon_number | "10"; | gene_type | " |
| Dt_chr13 | Cufflinks | exon | 23754909 | 23755225 | . | . | gene_id | "XLOC_163638"; | transcript_id | "Novel_002238"; | exon_number | "11"; | gene_type | " |
| Dt_chr13 | Cufflinks | exon | 23737702 | 23738612 | . | . | gene_id | "XLOC_163638"; | transcript_id | "Novel_002239"; | exon_number | "1";  | gene_type | " |
| Dt_chr13 | Cufflinks | exon | 23749267 | 23749369 | . | . | gene_id | "XLOC_163638"; | transcript_id | "Novel_002239"; | exon_number | "2";  | gene_type | " |
| Dt_chr13 | Cufflinks | exon | 23750488 | 23750590 | . | . | gene_id | "XLOC_163638"; | transcript_id | "Novel_002239"; | exon_number | "3";  | gene_type | " |
| Dt_chr13 | Cufflinks | exon | 23750980 | 23751405 | . | . | gene_id | "XLOC_163638"; | transcript_id | "Novel_002239"; | exon_number | "4";  | gene_type | " |
| Dt_chr13 | Cufflinks | exon | 23748684 | 23749369 | . | . | gene_id | "XLOC_163638"; | transcript_id | "Novel_002240"; | exon_number | "1";  | gene_type | " |
| Dt_chr13 | Cufflinks | exon | 23750488 | 23750590 | . | . | gene_id | "XLOC_163638"; | transcript_id | "Novel_002240"; | exon_number | "2";  | gene_type | " |
| Dt_chr13 | Cufflinks | exon | 23750980 | 23752122 | . | . | gene_id | "XLOC_163638"; | transcript_id | "Novel_002240"; | exon_number | "3";  | gene_type | " |
| Dt_chr13 | Cufflinks | exon | 25059987 | 25060356 | . | . | gene_id | "XLOC_163752"; | transcript_id | "Novel_002241"; | exon_number | "1";  | gene_type | " |
| Dt_chr13 | Cufflinks | exon | 25060436 | 25061343 | . | . | gene_id | "XLOC_163752"; | transcript_id | "Novel_002241"; | exon_number | "2";  | gene_type | " |
| Dt_chr13 | Cufflinks | exon | 25061476 | 25061530 | . | . | gene_id | "XLOC_163752"; | transcript_id | "Novel_002241"; | exon_number | "3";  | gene_type | " |
| Dt_chr13 | Cufflinks | exon | 25930424 | 25930924 | . | . | gene_id | "XLOC_163795"; | transcript_id | "Novel_002242"; | exon_number | "1";  | gene_type | " |
| Dt_chr13 | Cufflinks | exon | 25933212 | 25933335 | . | . | gene_id | "XLOC_163795"; | transcript_id | "Novel_002242"; | exon_number | "2";  | gene_type | " |
| Dt_chr13 | Cufflinks | exon | 25933418 | 25933738 | . | . | gene_id | "XLOC_163795"; | transcript_id | "Novel_002242"; | exon_number | "3";  | gene_type | " |
| Dt_chr13 | Cufflinks | exon | 25930503 | 25930924 | . | . | gene_id | "XLOC_163795"; | transcript_id | "Novel_002243"; | exon_number | "1";  | gene_type | " |
| Dt_chr13 | Cufflinks | exon | 25932602 | 25932770 | . | . | gene_id | "XLOC_163795"; | transcript_id | "Novel_002243"; | exon_number | "2";  | gene_type | " |
| Dt_chr13 | Cufflinks | exon | 25933212 | 25933335 | . | . | gene_id | "XLOC_163795"; | transcript_id | "Novel_002243"; | exon_number | "3";  | gene_type | " |
| Dt_chr13 | Cufflinks | exon | 25933418 | 25933719 | . | . | gene_id | "XLOC_163795"; | transcript_id | "Novel_002243"; | exon_number | "4";  | gene_type | " |
| Dt_chr13 | Cufflinks | exon | 25930503 | 25930924 | . | . | gene_id | "XLOC_163795"; | transcript_id | "Novel_002244"; | exon_number | "1";  | gene_type | " |
| Dt_chr13 | Cufflinks | exon | 25933212 | 25933719 | . | . | gene_id | "XLOC_163795"; | transcript_id | "Novel_002244"; | exon_number | "2";  | gene_type | " |
| Dt_chr13 | Cufflinks | exon | 25930596 | 25930924 | . | . | gene_id | "XLOC_163795"; | transcript_id | "Novel_002245"; | exon_number | "1";  | gene_type | " |
| Dt_chr13 | Cufflinks | exon | 25932602 | 25932887 | . | . | gene_id | "XLOC_163795"; | transcript_id | "Novel_002245"; | exon_number | "2";  | gene_type | " |
| Dt_chr13 | Cufflinks | exon | 25930604 | 25933335 | . | . | gene_id | "XLOC_163795"; | transcript_id | "Novel_002246"; | exon_number | "1";  | gene_type | " |
| Dt_chr13 | Cufflinks | exon | 25933418 | 25933643 | . | . | gene_id | "XLOC_163795"; | transcript_id | "Novel_002246"; | exon_number | "2";  | gene_type | " |
| Dt_chr13 | Cufflinks | exon | 27165382 | 27165867 | . | . | gene_id | "XLOC_163860"; | transcript_id | "Novel_002247"; | exon_number | "1";  | gene_type | " |
| Dt_chr13 | Cufflinks | exon | 27182493 | 27182704 | . | . | gene_id | "XLOC_163860"; | transcript_id | "Novel_002247"; | exon_number | "2";  | gene_type | " |
| Dt_chr13 | Cufflinks | exon | 27879880 | 27880240 | . | . | gene_id | "XLOC_163921"; | transcript_id | "Novel_002248"; | exon_number | "1";  | gene_type | " |
| Dt_chr13 | Cufflinks | exon | 27880579 | 27880940 | . | . | gene_id | "XLOC_163921"; | transcript_id | "Novel_002248"; | exon_number | "2";  | gene_type | " |
| Dt_chr13 | Cufflinks | exon | 27879890 | 27880240 | . | . | gene_id | "XLOC_163921"; | transcript_id | "Novel_002249"; | exon_number | "1";  | gene_type | " |



|          |           |      |          |          |   |   |         |                |               |                 |             |      |           |   |
|----------|-----------|------|----------|----------|---|---|---------|----------------|---------------|-----------------|-------------|------|-----------|---|
| Dt_chr13 | Cufflinks | exon | 27880579 | 27880712 | . | . | gene_id | "XLOC_163921"; | transcript_id | "Novel_002249"; | exon_number | "2"; | gene_type | " |
| Dt_chr13 | Cufflinks | exon | 27880800 | 27880998 | . | . | gene_id | "XLOC_163921"; | transcript_id | "Novel_002249"; | exon_number | "3"; | gene_type | " |
| Dt_chr13 | Cufflinks | exon | 32848429 | 32848706 | . | . | gene_id | "XLOC_164223"; | transcript_id | "Novel_002250"; | exon_number | "1"; | gene_type | " |
| Dt_chr13 | Cufflinks | exon | 32849305 | 32858864 | . | . | gene_id | "XLOC_164223"; | transcript_id | "Novel_002250"; | exon_number | "2"; | gene_type | " |
| Dt_chr13 | Cufflinks | exon | 36373413 | 36374691 | . | . | gene_id | "XLOC_164399"; | transcript_id | "Novel_002251"; | exon_number | "1"; | gene_type | " |
| Dt_chr13 | Cufflinks | exon | 36374771 | 36375065 | . | . | gene_id | "XLOC_164399"; | transcript_id | "Novel_002251"; | exon_number | "2"; | gene_type | " |
| Dt_chr13 | Cufflinks | exon | 36918837 | 36919340 | . | . | gene_id | "XLOC_164423"; | transcript_id | "Novel_002252"; | exon_number | "1"; | gene_type | " |
| Dt_chr13 | Cufflinks | exon | 36923165 | 36925116 | . | . | gene_id | "XLOC_164423"; | transcript_id | "Novel_002252"; | exon_number | "2"; | gene_type | " |
| Dt_chr13 | Cufflinks | exon | 41571286 | 41571406 | . | . | gene_id | "XLOC_164686"; | transcript_id | "Novel_002253"; | exon_number | "1"; | gene_type | " |
| Dt_chr13 | Cufflinks | exon | 41571490 | 41571577 | . | . | gene_id | "XLOC_164686"; | transcript_id | "Novel_002253"; | exon_number | "2"; | gene_type | " |
| Dt_chr13 | Cufflinks | exon | 41572424 | 41572459 | . | . | gene_id | "XLOC_164686"; | transcript_id | "Novel_002253"; | exon_number | "3"; | gene_type | " |
| Dt_chr13 | Cufflinks | exon | 47455750 | 47456092 | . | . | gene_id | "XLOC_165108"; | transcript_id | "Novel_002254"; | exon_number | "1"; | gene_type | " |
| Dt_chr13 | Cufflinks | exon | 47456191 | 47456248 | . | . | gene_id | "XLOC_165108"; | transcript_id | "Novel_002254"; | exon_number | "2"; | gene_type | " |
| Dt_chr13 | Cufflinks | exon | 47457215 | 47457690 | . | . | gene_id | "XLOC_165108"; | transcript_id | "Novel_002254"; | exon_number | "3"; | gene_type | " |
| Dt_chr13 | Cufflinks | exon | 47455925 | 47456248 | . | . | gene_id | "XLOC_165108"; | transcript_id | "Novel_002255"; | exon_number | "1"; | gene_type | " |
| Dt_chr13 | Cufflinks | exon | 47457215 | 47457672 | . | . | gene_id | "XLOC_165108"; | transcript_id | "Novel_002255"; | exon_number | "2"; | gene_type | " |
| Dt_chr13 | Cufflinks | exon | 51677028 | 51677462 | . | . | gene_id | "XLOC_165514"; | transcript_id | "Novel_002256"; | exon_number | "1"; | gene_type | " |
| Dt_chr13 | Cufflinks | exon | 51677549 | 51678038 | . | . | gene_id | "XLOC_165514"; | transcript_id | "Novel_002256"; | exon_number | "2"; | gene_type | " |
| Dt_chr13 | Cufflinks | exon | 51678205 | 51678324 | . | . | gene_id | "XLOC_165514"; | transcript_id | "Novel_002256"; | exon_number | "3"; | gene_type | " |
| Dt_chr13 | Cufflinks | exon | 51678415 | 51678522 | . | . | gene_id | "XLOC_165514"; | transcript_id | "Novel_002256"; | exon_number | "4"; | gene_type | " |
| Dt_chr13 | Cufflinks | exon | 51679073 | 51679394 | . | . | gene_id | "XLOC_165514"; | transcript_id | "Novel_002256"; | exon_number | "5"; | gene_type | " |
| Dt_chr13 | Cufflinks | exon | 51680054 | 51680184 | . | . | gene_id | "XLOC_165514"; | transcript_id | "Novel_002256"; | exon_number | "6"; | gene_type | " |
| Dt_chr13 | Cufflinks | exon | 52271888 | 52274657 | . | . | gene_id | "XLOC_165557"; | transcript_id | "Novel_002257"; | exon_number | "1"; | gene_type | " |
| Dt_chr13 | Cufflinks | exon | 52274945 | 52275419 | . | . | gene_id | "XLOC_165557"; | transcript_id | "Novel_002257"; | exon_number | "2"; | gene_type | " |
| Dt_chr13 | Cufflinks | exon | 52780992 | 52781840 | . | . | gene_id | "XLOC_165612"; | transcript_id | "Novel_002258"; | exon_number | "1"; | gene_type | " |
| Dt_chr13 | Cufflinks | exon | 53605733 | 53606287 | . | . | gene_id | "XLOC_165716"; | transcript_id | "Novel_002259"; | exon_number | "1"; | gene_type | " |
| Dt_chr13 | Cufflinks | exon | 53606379 | 53606490 | . | . | gene_id | "XLOC_165716"; | transcript_id | "Novel_002259"; | exon_number | "2"; | gene_type | " |
| Dt_chr13 | Cufflinks | exon | 53606562 | 53607252 | . | . | gene_id | "XLOC_165716"; | transcript_id | "Novel_002259"; | exon_number | "3"; | gene_type | " |
| Dt_chr13 | Cufflinks | exon | 53607330 | 53607421 | . | . | gene_id | "XLOC_165716"; | transcript_id | "Novel_002259"; | exon_number | "4"; | gene_type | " |
| Dt_chr13 | Cufflinks | exon | 53607517 | 53607570 | . | . | gene_id | "XLOC_165716"; | transcript_id | "Novel_002259"; | exon_number | "5"; | gene_type | " |
| Dt_chr13 | Cufflinks | exon | 53608173 | 53608251 | . | . | gene_id | "XLOC_165716"; | transcript_id | "Novel_002259"; | exon_number | "6"; | gene_type | " |
| Dt_chr13 | Cufflinks | exon | 53608438 | 53608558 | . | . | gene_id | "XLOC_165716"; | transcript_id | "Novel_002259"; | exon_number | "7"; | gene_type | " |
| Dt_chr13 | Cufflinks | exon | 53605837 | 53606287 | . | . | gene_id | "XLOC_165716"; | transcript_id | "Novel_002260"; | exon_number | "1"; | gene_type | " |
| Dt_chr13 | Cufflinks | exon | 53606379 | 53606490 | . | . | gene_id | "XLOC_165716"; | transcript_id | "Novel_002260"; | exon_number | "2"; | gene_type | " |
| Dt_chr13 | Cufflinks | exon | 53606562 | 53606629 | . | . | gene_id | "XLOC_165716"; | transcript_id | "Novel_002260"; | exon_number | "3"; | gene_type | " |

|          |           |      |          |          |   |   |         |                |               |                 |             |      |           |   |
|----------|-----------|------|----------|----------|---|---|---------|----------------|---------------|-----------------|-------------|------|-----------|---|
| Dt_chr13 | Cufflinks | exon | 53607139 | 53607252 | . | . | gene_id | "XLOC_165716"; | transcript_id | "Novel_002260"; | exon_number | "4"; | gene_type | " |
| Dt_chr13 | Cufflinks | exon | 53607330 | 53607421 | . | . | gene_id | "XLOC_165716"; | transcript_id | "Novel_002260"; | exon_number | "5"; | gene_type | " |
| Dt_chr13 | Cufflinks | exon | 53607517 | 53607570 | . | . | gene_id | "XLOC_165716"; | transcript_id | "Novel_002260"; | exon_number | "6"; | gene_type | " |
| Dt_chr13 | Cufflinks | exon | 53608173 | 53608251 | . | . | gene_id | "XLOC_165716"; | transcript_id | "Novel_002260"; | exon_number | "7"; | gene_type | " |
| Dt_chr13 | Cufflinks | exon | 53608438 | 53608568 | . | . | gene_id | "XLOC_165716"; | transcript_id | "Novel_002260"; | exon_number | "8"; | gene_type | " |
| Dt_chr13 | Cufflinks | exon | 53605852 | 53606287 | . | . | gene_id | "XLOC_165716"; | transcript_id | "Novel_002261"; | exon_number | "1"; | gene_type | " |
| Dt_chr13 | Cufflinks | exon | 53606379 | 53606931 | . | . | gene_id | "XLOC_165716"; | transcript_id | "Novel_002261"; | exon_number | "2"; | gene_type | " |
| Dt_chr13 | Cufflinks | exon | 53606381 | 53607252 | . | . | gene_id | "XLOC_165716"; | transcript_id | "Novel_002262"; | exon_number | "1"; | gene_type | " |
| Dt_chr13 | Cufflinks | exon | 53607330 | 53607421 | . | . | gene_id | "XLOC_165716"; | transcript_id | "Novel_002262"; | exon_number | "2"; | gene_type | " |
| Dt_chr13 | Cufflinks | exon | 53607517 | 53607570 | . | . | gene_id | "XLOC_165716"; | transcript_id | "Novel_002262"; | exon_number | "3"; | gene_type | " |
| Dt_chr13 | Cufflinks | exon | 53608173 | 53608251 | . | . | gene_id | "XLOC_165716"; | transcript_id | "Novel_002262"; | exon_number | "4"; | gene_type | " |
| Dt_chr13 | Cufflinks | exon | 53608438 | 53608582 | . | . | gene_id | "XLOC_165716"; | transcript_id | "Novel_002262"; | exon_number | "5"; | gene_type | " |
| Dt_chr13 | Cufflinks | exon | 54156968 | 54157044 | . | . | gene_id | "XLOC_165786"; | transcript_id | "Novel_002263"; | exon_number | "1"; | gene_type | " |
| Dt_chr13 | Cufflinks | exon | 54157234 | 54157597 | . | . | gene_id | "XLOC_165786"; | transcript_id | "Novel_002263"; | exon_number | "2"; | gene_type | " |
| Dt_chr13 | Cufflinks | exon | 54471148 | 54471194 | . | . | gene_id | "XLOC_165836"; | transcript_id | "Novel_002264"; | exon_number | "1"; | gene_type | " |
| Dt_chr13 | Cufflinks | exon | 54472257 | 54472319 | . | . | gene_id | "XLOC_165836"; | transcript_id | "Novel_002264"; | exon_number | "2"; | gene_type | " |
| Dt_chr13 | Cufflinks | exon | 54473707 | 54473777 | . | . | gene_id | "XLOC_165836"; | transcript_id | "Novel_002264"; | exon_number | "3"; | gene_type | " |
| Dt_chr13 | Cufflinks | exon | 54475613 | 54475764 | . | . | gene_id | "XLOC_165836"; | transcript_id | "Novel_002264"; | exon_number | "4"; | gene_type | " |
| Dt_chr13 | Cufflinks | exon | 54653277 | 54654063 | . | . | gene_id | "XLOC_165874"; | transcript_id | "Novel_002265"; | exon_number | "1"; | gene_type | " |
| Dt_chr13 | Cufflinks | exon | 54654600 | 54654702 | . | . | gene_id | "XLOC_165874"; | transcript_id | "Novel_002265"; | exon_number | "2"; | gene_type | " |
| Dt_chr13 | Cufflinks | exon | 54654802 | 54655105 | . | . | gene_id | "XLOC_165874"; | transcript_id | "Novel_002265"; | exon_number | "3"; | gene_type | " |
| Dt_chr13 | Cufflinks | exon | 54653428 | 54653676 | . | . | gene_id | "XLOC_165874"; | transcript_id | "Novel_002266"; | exon_number | "1"; | gene_type | " |
| Dt_chr13 | Cufflinks | exon | 54653775 | 54654025 | . | . | gene_id | "XLOC_165874"; | transcript_id | "Novel_002266"; | exon_number | "2"; | gene_type | " |
| Dt_chr13 | Cufflinks | exon | 54654517 | 54654702 | . | . | gene_id | "XLOC_165874"; | transcript_id | "Novel_002267"; | exon_number | "1"; | gene_type | " |
| Dt_chr13 | Cufflinks | exon | 54654802 | 54655073 | . | . | gene_id | "XLOC_165874"; | transcript_id | "Novel_002267"; | exon_number | "2"; | gene_type | " |
| Dt_chr13 | Cufflinks | exon | 54660185 | 54660630 | . | . | gene_id | "XLOC_165875"; | transcript_id | "Novel_002268"; | exon_number | "1"; | gene_type | " |
| Dt_chr13 | Cufflinks | exon | 54660915 | 54661020 | . | . | gene_id | "XLOC_165875"; | transcript_id | "Novel_002268"; | exon_number | "2"; | gene_type | " |
| Dt_chr13 | Cufflinks | exon | 54661553 | 54661648 | . | . | gene_id | "XLOC_165875"; | transcript_id | "Novel_002268"; | exon_number | "3"; | gene_type | " |
| Dt_chr13 | Cufflinks | exon | 54661730 | 54661979 | . | . | gene_id | "XLOC_165875"; | transcript_id | "Novel_002268"; | exon_number | "4"; | gene_type | " |
| Dt_chr13 | Cufflinks | exon | 54660616 | 54660630 | . | . | gene_id | "XLOC_165875"; | transcript_id | "Novel_002269"; | exon_number | "1"; | gene_type | " |
| Dt_chr13 | Cufflinks | exon | 54660915 | 54661020 | . | . | gene_id | "XLOC_165875"; | transcript_id | "Novel_002269"; | exon_number | "2"; | gene_type | " |
| Dt_chr13 | Cufflinks | exon | 54661553 | 54663125 | . | . | gene_id | "XLOC_165875"; | transcript_id | "Novel_002269"; | exon_number | "3"; | gene_type | " |
| Dt_chr13 | Cufflinks | exon | 54663216 | 54664243 | . | . | gene_id | "XLOC_165875"; | transcript_id | "Novel_002269"; | exon_number | "4"; | gene_type | " |
| Dt_chr13 | Cufflinks | exon | 54712018 | 54712897 | . | . | gene_id | "XLOC_165890"; | transcript_id | "Novel_002270"; | exon_number | "1"; | gene_type | " |
| Dt_chr13 | Cufflinks | exon | 54713000 | 54713293 | . | . | gene_id | "XLOC_165890"; | transcript_id | "Novel_002270"; | exon_number | "2"; | gene_type | " |

|          |           |      |          |          |   |   |   |         |                |               |                 |             |       |           |   |
|----------|-----------|------|----------|----------|---|---|---|---------|----------------|---------------|-----------------|-------------|-------|-----------|---|
| Dt_chr13 | Cufflinks | exon | 54713392 | 54713536 | . | - | . | gene_id | "XLOC_165890"; | transcript_id | "Novel_002270"; | exon_number | "3";  | gene_type | " |
| Dt_chr13 | Cufflinks | exon | 54714238 | 54714452 | . | - | . | gene_id | "XLOC_165890"; | transcript_id | "Novel_002270"; | exon_number | "4";  | gene_type | " |
| Dt_chr13 | Cufflinks | exon | 54800398 | 54800839 | . | - | . | gene_id | "XLOC_165907"; | transcript_id | "Novel_002271"; | exon_number | "1";  | gene_type | " |
| Dt_chr13 | Cufflinks | exon | 54801033 | 54801119 | . | - | . | gene_id | "XLOC_165907"; | transcript_id | "Novel_002271"; | exon_number | "2";  | gene_type | " |
| Dt_chr13 | Cufflinks | exon | 54801227 | 54801423 | . | - | . | gene_id | "XLOC_165907"; | transcript_id | "Novel_002271"; | exon_number | "3";  | gene_type | " |
| Dt_chr13 | Cufflinks | exon | 54801810 | 54801905 | . | - | . | gene_id | "XLOC_165907"; | transcript_id | "Novel_002271"; | exon_number | "4";  | gene_type | " |
| Dt_chr13 | Cufflinks | exon | 54802052 | 54802091 | . | - | . | gene_id | "XLOC_165907"; | transcript_id | "Novel_002271"; | exon_number | "5";  | gene_type | " |
| Dt_chr13 | Cufflinks | exon | 54802568 | 54802684 | . | - | . | gene_id | "XLOC_165907"; | transcript_id | "Novel_002271"; | exon_number | "6";  | gene_type | " |
| Dt_chr13 | Cufflinks | exon | 54803355 | 54803413 | . | - | . | gene_id | "XLOC_165907"; | transcript_id | "Novel_002271"; | exon_number | "7";  | gene_type | " |
| Dt_chr13 | Cufflinks | exon | 55643472 | 55643651 | . | - | . | gene_id | "XLOC_166085"; | transcript_id | "Novel_002272"; | exon_number | "1";  | gene_type | " |
| Dt_chr13 | Cufflinks | exon | 55643741 | 55643820 | . | - | . | gene_id | "XLOC_166085"; | transcript_id | "Novel_002272"; | exon_number | "2";  | gene_type | " |
| Dt_chr13 | Cufflinks | exon | 55644086 | 55644203 | . | - | . | gene_id | "XLOC_166086"; | transcript_id | "Novel_002273"; | exon_number | "1";  | gene_type | " |
| Dt_chr13 | Cufflinks | exon | 55644286 | 55644858 | . | - | . | gene_id | "XLOC_166086"; | transcript_id | "Novel_002273"; | exon_number | "2";  | gene_type | " |
| Dt_chr13 | Cufflinks | exon | 55727471 | 55729098 | . | - | . | gene_id | "XLOC_166102"; | transcript_id | "Novel_002274"; | exon_number | "1";  | gene_type | " |
| Dt_chr13 | Cufflinks | exon | 55729184 | 55729747 | . | - | . | gene_id | "XLOC_166102"; | transcript_id | "Novel_002274"; | exon_number | "2";  | gene_type | " |
| Dt_chr13 | Cufflinks | exon | 55729826 | 55729916 | . | - | . | gene_id | "XLOC_166102"; | transcript_id | "Novel_002274"; | exon_number | "3";  | gene_type | " |
| Dt_chr13 | Cufflinks | exon | 55730255 | 55730489 | . | - | . | gene_id | "XLOC_166102"; | transcript_id | "Novel_002274"; | exon_number | "4";  | gene_type | " |
| Dt_chr13 | Cufflinks | exon | 55727525 | 55729098 | . | - | . | gene_id | "XLOC_166102"; | transcript_id | "Novel_002275"; | exon_number | "1";  | gene_type | " |
| Dt_chr13 | Cufflinks | exon | 55729184 | 55729916 | . | - | . | gene_id | "XLOC_166102"; | transcript_id | "Novel_002275"; | exon_number | "2";  | gene_type | " |
| Dt_chr13 | Cufflinks | exon | 55730255 | 55730482 | . | - | . | gene_id | "XLOC_166102"; | transcript_id | "Novel_002275"; | exon_number | "3";  | gene_type | " |
| Dt_chr2  | Cufflinks | exon | 3034583  | 3034690  | . | + | . | gene_id | "XLOC_166345"; | transcript_id | "Novel_002276"; | exon_number | "1";  | gene_type | " |
| Dt_chr2  | Cufflinks | exon | 3035119  | 3035181  | . | + | . | gene_id | "XLOC_166345"; | transcript_id | "Novel_002276"; | exon_number | "2";  | gene_type | " |
| Dt_chr2  | Cufflinks | exon | 3035439  | 3035478  | . | + | . | gene_id | "XLOC_166345"; | transcript_id | "Novel_002276"; | exon_number | "3";  | gene_type | " |
| Dt_chr2  | Cufflinks | exon | 3035580  | 3035803  | . | + | . | gene_id | "XLOC_166345"; | transcript_id | "Novel_002276"; | exon_number | "4";  | gene_type | " |
| Dt_chr2  | Cufflinks | exon | 3036140  | 3036633  | . | + | . | gene_id | "XLOC_166345"; | transcript_id | "Novel_002276"; | exon_number | "5";  | gene_type | " |
| Dt_chr2  | Cufflinks | exon | 3036812  | 3037116  | . | + | . | gene_id | "XLOC_166345"; | transcript_id | "Novel_002276"; | exon_number | "6";  | gene_type | " |
| Dt_chr2  | Cufflinks | exon | 3037651  | 3037849  | . | + | . | gene_id | "XLOC_166345"; | transcript_id | "Novel_002276"; | exon_number | "7";  | gene_type | " |
| Dt_chr2  | Cufflinks | exon | 3037940  | 3038093  | . | + | . | gene_id | "XLOC_166345"; | transcript_id | "Novel_002276"; | exon_number | "8";  | gene_type | " |
| Dt_chr2  | Cufflinks | exon | 3038345  | 3038603  | . | + | . | gene_id | "XLOC_166345"; | transcript_id | "Novel_002276"; | exon_number | "9";  | gene_type | " |
| Dt_chr2  | Cufflinks | exon | 3038812  | 3039169  | . | + | . | gene_id | "XLOC_166345"; | transcript_id | "Novel_002276"; | exon_number | "10"; | gene_type | " |
| Dt_chr2  | Cufflinks | exon | 5602092  | 5602629  | . | + | . | gene_id | "XLOC_166429"; | transcript_id | "Novel_002277"; | exon_number | "1";  | gene_type | " |
| Dt_chr2  | Cufflinks | exon | 5602775  | 5603297  | . | + | . | gene_id | "XLOC_166429"; | transcript_id | "Novel_002277"; | exon_number | "2";  | gene_type | " |
| Dt_chr2  | Cufflinks | exon | 7004802  | 7005206  | . | + | . | gene_id | "XLOC_166534"; | transcript_id | "Novel_002278"; | exon_number | "1";  | gene_type | " |
| Dt_chr2  | Cufflinks | exon | 7005303  | 7005392  | . | + | . | gene_id | "XLOC_166534"; | transcript_id | "Novel_002278"; | exon_number | "2";  | gene_type | " |
| Dt_chr2  | Cufflinks | exon | 7007336  | 7007929  | . | + | . | gene_id | "XLOC_166534"; | transcript_id | "Novel_002278"; | exon_number | "3";  | gene_type | " |



|         |           |      |          |          |   |   |   |         |                |               |                 |             |      |           |   |
|---------|-----------|------|----------|----------|---|---|---|---------|----------------|---------------|-----------------|-------------|------|-----------|---|
| Dt_chr2 | Cufflinks | exon | 10116662 | 10117486 | . | + | . | gene_id | "XLOC_166831"; | transcript_id | "Novel_002286"; | exon_number | "2"; | gene_type | " |
| Dt_chr2 | Cufflinks | exon | 10315802 | 10316191 | . | + | . | gene_id | "XLOC_166863"; | transcript_id | "Novel_002287"; | exon_number | "1"; | gene_type | " |
| Dt_chr2 | Cufflinks | exon | 10318468 | 10318663 | . | + | . | gene_id | "XLOC_166863"; | transcript_id | "Novel_002287"; | exon_number | "2"; | gene_type | " |
| Dt_chr2 | Cufflinks | exon | 10318738 | 10319293 | . | + | . | gene_id | "XLOC_166863"; | transcript_id | "Novel_002287"; | exon_number | "3"; | gene_type | " |
| Dt_chr2 | Cufflinks | exon | 10445723 | 10446520 | . | + | . | gene_id | "XLOC_166881"; | transcript_id | "Novel_002288"; | exon_number | "1"; | gene_type | " |
| Dt_chr2 | Cufflinks | exon | 10446642 | 10447789 | . | + | . | gene_id | "XLOC_166881"; | transcript_id | "Novel_002288"; | exon_number | "2"; | gene_type | " |
| Dt_chr2 | Cufflinks | exon | 10456563 | 10456686 | . | + | . | gene_id | "XLOC_166886"; | transcript_id | "Novel_002289"; | exon_number | "1"; | gene_type | " |
| Dt_chr2 | Cufflinks | exon | 10456787 | 10456888 | . | + | . | gene_id | "XLOC_166886"; | transcript_id | "Novel_002289"; | exon_number | "2"; | gene_type | " |
| Dt_chr2 | Cufflinks | exon | 10457167 | 10457237 | . | + | . | gene_id | "XLOC_166886"; | transcript_id | "Novel_002289"; | exon_number | "3"; | gene_type | " |
| Dt_chr2 | Cufflinks | exon | 10457315 | 10457377 | . | + | . | gene_id | "XLOC_166886"; | transcript_id | "Novel_002289"; | exon_number | "4"; | gene_type | " |
| Dt_chr2 | Cufflinks | exon | 10457471 | 10458136 | . | + | . | gene_id | "XLOC_166886"; | transcript_id | "Novel_002289"; | exon_number | "5"; | gene_type | " |
| Dt_chr2 | Cufflinks | exon | 10522883 | 10523258 | . | + | . | gene_id | "XLOC_166895"; | transcript_id | "Novel_002290"; | exon_number | "1"; | gene_type | " |
| Dt_chr2 | Cufflinks | exon | 10523733 | 10523796 | . | + | . | gene_id | "XLOC_166895"; | transcript_id | "Novel_002290"; | exon_number | "2"; | gene_type | " |
| Dt_chr2 | Cufflinks | exon | 10524049 | 10524078 | . | + | . | gene_id | "XLOC_166895"; | transcript_id | "Novel_002290"; | exon_number | "3"; | gene_type | " |
| Dt_chr2 | Cufflinks | exon | 10524322 | 10524429 | . | + | . | gene_id | "XLOC_166895"; | transcript_id | "Novel_002290"; | exon_number | "4"; | gene_type | " |
| Dt_chr2 | Cufflinks | exon | 10524529 | 10524791 | . | + | . | gene_id | "XLOC_166895"; | transcript_id | "Novel_002290"; | exon_number | "5"; | gene_type | " |
| Dt_chr2 | Cufflinks | exon | 10525520 | 10525782 | . | + | . | gene_id | "XLOC_166895"; | transcript_id | "Novel_002290"; | exon_number | "6"; | gene_type | " |
| Dt_chr2 | Cufflinks | exon | 10522889 | 10523258 | . | + | . | gene_id | "XLOC_166895"; | transcript_id | "Novel_002291"; | exon_number | "1"; | gene_type | " |
| Dt_chr2 | Cufflinks | exon | 10524049 | 10524078 | . | + | . | gene_id | "XLOC_166895"; | transcript_id | "Novel_002291"; | exon_number | "2"; | gene_type | " |
| Dt_chr2 | Cufflinks | exon | 10524322 | 10524429 | . | + | . | gene_id | "XLOC_166895"; | transcript_id | "Novel_002291"; | exon_number | "3"; | gene_type | " |
| Dt_chr2 | Cufflinks | exon | 10524529 | 10524791 | . | + | . | gene_id | "XLOC_166895"; | transcript_id | "Novel_002291"; | exon_number | "4"; | gene_type | " |
| Dt_chr2 | Cufflinks | exon | 10525520 | 10525792 | . | + | . | gene_id | "XLOC_166895"; | transcript_id | "Novel_002291"; | exon_number | "5"; | gene_type | " |
| Dt_chr2 | Cufflinks | exon | 10522889 | 10523258 | . | + | . | gene_id | "XLOC_166895"; | transcript_id | "Novel_002292"; | exon_number | "1"; | gene_type | " |
| Dt_chr2 | Cufflinks | exon | 10523733 | 10524078 | . | + | . | gene_id | "XLOC_166895"; | transcript_id | "Novel_002292"; | exon_number | "2"; | gene_type | " |
| Dt_chr2 | Cufflinks | exon | 10524322 | 10524429 | . | + | . | gene_id | "XLOC_166895"; | transcript_id | "Novel_002292"; | exon_number | "3"; | gene_type | " |
| Dt_chr2 | Cufflinks | exon | 10524529 | 10524791 | . | + | . | gene_id | "XLOC_166895"; | transcript_id | "Novel_002292"; | exon_number | "4"; | gene_type | " |
| Dt_chr2 | Cufflinks | exon | 10525520 | 10525792 | . | + | . | gene_id | "XLOC_166895"; | transcript_id | "Novel_002292"; | exon_number | "5"; | gene_type | " |
| Dt_chr2 | Cufflinks | exon | 10684727 | 10684933 | . | + | . | gene_id | "XLOC_166902"; | transcript_id | "Novel_002293"; | exon_number | "1"; | gene_type | " |
| Dt_chr2 | Cufflinks | exon | 10685020 | 10686547 | . | + | . | gene_id | "XLOC_166902"; | transcript_id | "Novel_002293"; | exon_number | "2"; | gene_type | " |
| Dt_chr2 | Cufflinks | exon | 10684729 | 10684933 | . | + | . | gene_id | "XLOC_166902"; | transcript_id | "Novel_002294"; | exon_number | "1"; | gene_type | " |
| Dt_chr2 | Cufflinks | exon | 10685020 | 10685367 | . | + | . | gene_id | "XLOC_166902"; | transcript_id | "Novel_002294"; | exon_number | "2"; | gene_type | " |
| Dt_chr2 | Cufflinks | exon | 10685442 | 10685516 | . | + | . | gene_id | "XLOC_166902"; | transcript_id | "Novel_002294"; | exon_number | "3"; | gene_type | " |
| Dt_chr2 | Cufflinks | exon | 10700452 | 10700556 | . | + | . | gene_id | "XLOC_166912"; | transcript_id | "Novel_002295"; | exon_number | "1"; | gene_type | " |
| Dt_chr2 | Cufflinks | exon | 10700652 | 10700779 | . | + | . | gene_id | "XLOC_166912"; | transcript_id | "Novel_002295"; | exon_number | "2"; | gene_type | " |
| Dt_chr2 | Cufflinks | exon | 10760776 | 10760856 | . | + | . | gene_id | "XLOC_166920"; | transcript_id | "Novel_002296"; | exon_number | "1"; | gene_type | " |

|         |           |      |          |          |   |   |   |         |                |               |                 |             |      |           |   |
|---------|-----------|------|----------|----------|---|---|---|---------|----------------|---------------|-----------------|-------------|------|-----------|---|
| Dt_chr2 | Cufflinks | exon | 10761030 | 10761289 | . | + | . | gene_id | "XLOC_166920"; | transcript_id | "Novel_002296"; | exon_number | "2"; | gene_type | " |
| Dt_chr2 | Cufflinks | exon | 10794174 | 10794616 | . | + | . | gene_id | "XLOC_166925"; | transcript_id | "Novel_002297"; | exon_number | "1"; | gene_type | " |
| Dt_chr2 | Cufflinks | exon | 10794692 | 10794907 | . | + | . | gene_id | "XLOC_166925"; | transcript_id | "Novel_002297"; | exon_number | "2"; | gene_type | " |
| Dt_chr2 | Cufflinks | exon | 10795058 | 10795372 | . | + | . | gene_id | "XLOC_166925"; | transcript_id | "Novel_002297"; | exon_number | "3"; | gene_type | " |
| Dt_chr2 | Cufflinks | exon | 10795499 | 10795588 | . | + | . | gene_id | "XLOC_166925"; | transcript_id | "Novel_002297"; | exon_number | "4"; | gene_type | " |
| Dt_chr2 | Cufflinks | exon | 10795675 | 10795758 | . | + | . | gene_id | "XLOC_166925"; | transcript_id | "Novel_002297"; | exon_number | "5"; | gene_type | " |
| Dt_chr2 | Cufflinks | exon | 10796042 | 10796077 | . | + | . | gene_id | "XLOC_166925"; | transcript_id | "Novel_002297"; | exon_number | "6"; | gene_type | " |
| Dt_chr2 | Cufflinks | exon | 10796177 | 10796266 | . | + | . | gene_id | "XLOC_166925"; | transcript_id | "Novel_002297"; | exon_number | "7"; | gene_type | " |
| Dt_chr2 | Cufflinks | exon | 10796356 | 10796450 | . | + | . | gene_id | "XLOC_166925"; | transcript_id | "Novel_002297"; | exon_number | "8"; | gene_type | " |
| Dt_chr2 | Cufflinks | exon | 10796543 | 10796556 | . | + | . | gene_id | "XLOC_166925"; | transcript_id | "Novel_002297"; | exon_number | "9"; | gene_type | " |
| Dt_chr2 | Cufflinks | exon | 10856912 | 10857054 | . | + | . | gene_id | "XLOC_166929"; | transcript_id | "Novel_002298"; | exon_number | "1"; | gene_type | " |
| Dt_chr2 | Cufflinks | exon | 10857212 | 10857673 | . | + | . | gene_id | "XLOC_166929"; | transcript_id | "Novel_002298"; | exon_number | "2"; | gene_type | " |
| Dt_chr2 | Cufflinks | exon | 11372562 | 11372924 | . | + | . | gene_id | "XLOC_166982"; | transcript_id | "Novel_002299"; | exon_number | "1"; | gene_type | " |
| Dt_chr2 | Cufflinks | exon | 11373039 | 11373118 | . | + | . | gene_id | "XLOC_166982"; | transcript_id | "Novel_002299"; | exon_number | "2"; | gene_type | " |
| Dt_chr2 | Cufflinks | exon | 11373479 | 11373884 | . | + | . | gene_id | "XLOC_166982"; | transcript_id | "Novel_002299"; | exon_number | "3"; | gene_type | " |
| Dt_chr2 | Cufflinks | exon | 11374049 | 11374472 | . | + | . | gene_id | "XLOC_166982"; | transcript_id | "Novel_002299"; | exon_number | "4"; | gene_type | " |
| Dt_chr2 | Cufflinks | exon | 11462312 | 11462520 | . | + | . | gene_id | "XLOC_166989"; | transcript_id | "Novel_002300"; | exon_number | "1"; | gene_type | " |
| Dt_chr2 | Cufflinks | exon | 11463077 | 11463153 | . | + | . | gene_id | "XLOC_166989"; | transcript_id | "Novel_002300"; | exon_number | "2"; | gene_type | " |
| Dt_chr2 | Cufflinks | exon | 11463463 | 11463562 | . | + | . | gene_id | "XLOC_166989"; | transcript_id | "Novel_002300"; | exon_number | "3"; | gene_type | " |
| Dt_chr2 | Cufflinks | exon | 11463816 | 11463837 | . | + | . | gene_id | "XLOC_166989"; | transcript_id | "Novel_002300"; | exon_number | "4"; | gene_type | " |
| Dt_chr2 | Cufflinks | exon | 11462363 | 11462520 | . | + | . | gene_id | "XLOC_166989"; | transcript_id | "Novel_002301"; | exon_number | "1"; | gene_type | " |
| Dt_chr2 | Cufflinks | exon | 11463077 | 11463153 | . | + | . | gene_id | "XLOC_166989"; | transcript_id | "Novel_002301"; | exon_number | "2"; | gene_type | " |
| Dt_chr2 | Cufflinks | exon | 11463463 | 11463562 | . | + | . | gene_id | "XLOC_166989"; | transcript_id | "Novel_002301"; | exon_number | "3"; | gene_type | " |
| Dt_chr2 | Cufflinks | exon | 11463699 | 11463834 | . | + | . | gene_id | "XLOC_166989"; | transcript_id | "Novel_002301"; | exon_number | "4"; | gene_type | " |
| Dt_chr2 | Cufflinks | exon | 11600689 | 11601471 | . | + | . | gene_id | "XLOC_167012"; | transcript_id | "Novel_002302"; | exon_number | "1"; | gene_type | " |
| Dt_chr2 | Cufflinks | exon | 11601544 | 11601772 | . | + | . | gene_id | "XLOC_167012"; | transcript_id | "Novel_002302"; | exon_number | "2"; | gene_type | " |
| Dt_chr2 | Cufflinks | exon | 11600697 | 11601719 | . | + | . | gene_id | "XLOC_167012"; | transcript_id | "Novel_002303"; | exon_number | "1"; | gene_type | " |
| Dt_chr2 | Cufflinks | exon | 11601811 | 11602901 | . | + | . | gene_id | "XLOC_167012"; | transcript_id | "Novel_002303"; | exon_number | "2"; | gene_type | " |
| Dt_chr2 | Cufflinks | exon | 11600701 | 11601163 | . | + | . | gene_id | "XLOC_167012"; | transcript_id | "Novel_002304"; | exon_number | "1"; | gene_type | " |
| Dt_chr2 | Cufflinks | exon | 11601234 | 11602472 | . | + | . | gene_id | "XLOC_167012"; | transcript_id | "Novel_002304"; | exon_number | "2"; | gene_type | " |
| Dt_chr2 | Cufflinks | exon | 11601828 | 11602169 | . | + | . | gene_id | "XLOC_167012"; | transcript_id | "Novel_002305"; | exon_number | "1"; | gene_type | " |
| Dt_chr2 | Cufflinks | exon | 11602251 | 11603046 | . | + | . | gene_id | "XLOC_167012"; | transcript_id | "Novel_002305"; | exon_number | "2"; | gene_type | " |
| Dt_chr2 | Cufflinks | exon | 11652657 | 11652931 | . | + | . | gene_id | "XLOC_167016"; | transcript_id | "Novel_002306"; | exon_number | "1"; | gene_type | " |
| Dt_chr2 | Cufflinks | exon | 11653041 | 11653097 | . | + | . | gene_id | "XLOC_167016"; | transcript_id | "Novel_002306"; | exon_number | "2"; | gene_type | " |
| Dt_chr2 | Cufflinks | exon | 11653185 | 11653239 | . | + | . | gene_id | "XLOC_167016"; | transcript_id | "Novel_002306"; | exon_number | "3"; | gene_type | " |

|         |           |      |          |          |   |   |   |         |                |               |                 |             |       |           |   |
|---------|-----------|------|----------|----------|---|---|---|---------|----------------|---------------|-----------------|-------------|-------|-----------|---|
| Dt_chr2 | Cufflinks | exon | 11860063 | 11860126 | . | + | . | gene_id | "XLOC_167032"; | transcript_id | "Novel_002307"; | exon_number | "1";  | gene_type | " |
| Dt_chr2 | Cufflinks | exon | 11869587 | 11869992 | . | + | . | gene_id | "XLOC_167032"; | transcript_id | "Novel_002307"; | exon_number | "2";  | gene_type | " |
| Dt_chr2 | Cufflinks | exon | 11913446 | 11913560 | . | + | . | gene_id | "XLOC_167050"; | transcript_id | "Novel_002308"; | exon_number | "1";  | gene_type | " |
| Dt_chr2 | Cufflinks | exon | 11913645 | 11914248 | . | + | . | gene_id | "XLOC_167050"; | transcript_id | "Novel_002308"; | exon_number | "2";  | gene_type | " |
| Dt_chr2 | Cufflinks | exon | 11916948 | 11917163 | . | + | . | gene_id | "XLOC_167050"; | transcript_id | "Novel_002308"; | exon_number | "3";  | gene_type | " |
| Dt_chr2 | Cufflinks | exon | 11917274 | 11917748 | . | + | . | gene_id | "XLOC_167050"; | transcript_id | "Novel_002308"; | exon_number | "4";  | gene_type | " |
| Dt_chr2 | Cufflinks | exon | 11917934 | 11918380 | . | + | . | gene_id | "XLOC_167050"; | transcript_id | "Novel_002309"; | exon_number | "1";  | gene_type | " |
| Dt_chr2 | Cufflinks | exon | 11918470 | 11918706 | . | + | . | gene_id | "XLOC_167050"; | transcript_id | "Novel_002309"; | exon_number | "2";  | gene_type | " |
| Dt_chr2 | Cufflinks | exon | 11918783 | 11918869 | . | + | . | gene_id | "XLOC_167050"; | transcript_id | "Novel_002309"; | exon_number | "3";  | gene_type | " |
| Dt_chr2 | Cufflinks | exon | 11918952 | 11919637 | . | + | . | gene_id | "XLOC_167050"; | transcript_id | "Novel_002309"; | exon_number | "4";  | gene_type | " |
| Dt_chr2 | Cufflinks | exon | 12200286 | 12201155 | . | + | . | gene_id | "XLOC_167069"; | transcript_id | "Novel_002310"; | exon_number | "1";  | gene_type | " |
| Dt_chr2 | Cufflinks | exon | 12201257 | 12201791 | . | + | . | gene_id | "XLOC_167069"; | transcript_id | "Novel_002310"; | exon_number | "2";  | gene_type | " |
| Dt_chr2 | Cufflinks | exon | 12211413 | 12212260 | . | + | . | gene_id | "XLOC_167070"; | transcript_id | "Novel_002311"; | exon_number | "1";  | gene_type | " |
| Dt_chr2 | Cufflinks | exon | 12212360 | 12212915 | . | + | . | gene_id | "XLOC_167070"; | transcript_id | "Novel_002311"; | exon_number | "2";  | gene_type | " |
| Dt_chr2 | Cufflinks | exon | 12328473 | 12328625 | . | + | . | gene_id | "XLOC_167077"; | transcript_id | "Novel_002312"; | exon_number | "1";  | gene_type | " |
| Dt_chr2 | Cufflinks | exon | 12328726 | 12329393 | . | + | . | gene_id | "XLOC_167077"; | transcript_id | "Novel_002312"; | exon_number | "2";  | gene_type | " |
| Dt_chr2 | Cufflinks | exon | 12410850 | 12411302 | . | + | . | gene_id | "XLOC_167084"; | transcript_id | "Novel_002313"; | exon_number | "1";  | gene_type | " |
| Dt_chr2 | Cufflinks | exon | 12411402 | 12411444 | . | + | . | gene_id | "XLOC_167084"; | transcript_id | "Novel_002313"; | exon_number | "2";  | gene_type | " |
| Dt_chr2 | Cufflinks | exon | 12412136 | 12412251 | . | + | . | gene_id | "XLOC_167085"; | transcript_id | "Novel_002314"; | exon_number | "1";  | gene_type | " |
| Dt_chr2 | Cufflinks | exon | 12412390 | 12412492 | . | + | . | gene_id | "XLOC_167085"; | transcript_id | "Novel_002314"; | exon_number | "2";  | gene_type | " |
| Dt_chr2 | Cufflinks | exon | 12412592 | 12412937 | . | + | . | gene_id | "XLOC_167085"; | transcript_id | "Novel_002314"; | exon_number | "3";  | gene_type | " |
| Dt_chr2 | Cufflinks | exon | 12413024 | 12413359 | . | + | . | gene_id | "XLOC_167085"; | transcript_id | "Novel_002314"; | exon_number | "4";  | gene_type | " |
| Dt_chr2 | Cufflinks | exon | 12581063 | 12581520 | . | + | . | gene_id | "XLOC_167103"; | transcript_id | "Novel_002315"; | exon_number | "1";  | gene_type | " |
| Dt_chr2 | Cufflinks | exon | 12582225 | 12583383 | . | + | . | gene_id | "XLOC_167103"; | transcript_id | "Novel_002316"; | exon_number | "1";  | gene_type | " |
| Dt_chr2 | Cufflinks | exon | 12583568 | 12583687 | . | + | . | gene_id | "XLOC_167103"; | transcript_id | "Novel_002316"; | exon_number | "2";  | gene_type | " |
| Dt_chr2 | Cufflinks | exon | 12584052 | 12584106 | . | + | . | gene_id | "XLOC_167103"; | transcript_id | "Novel_002316"; | exon_number | "3";  | gene_type | " |
| Dt_chr2 | Cufflinks | exon | 12584465 | 12584575 | . | + | . | gene_id | "XLOC_167103"; | transcript_id | "Novel_002316"; | exon_number | "4";  | gene_type | " |
| Dt_chr2 | Cufflinks | exon | 12584923 | 12584973 | . | + | . | gene_id | "XLOC_167103"; | transcript_id | "Novel_002316"; | exon_number | "5";  | gene_type | " |
| Dt_chr2 | Cufflinks | exon | 12585763 | 12585938 | . | + | . | gene_id | "XLOC_167103"; | transcript_id | "Novel_002316"; | exon_number | "6";  | gene_type | " |
| Dt_chr2 | Cufflinks | exon | 12586017 | 12586124 | . | + | . | gene_id | "XLOC_167103"; | transcript_id | "Novel_002316"; | exon_number | "7";  | gene_type | " |
| Dt_chr2 | Cufflinks | exon | 12586585 | 12586658 | . | + | . | gene_id | "XLOC_167103"; | transcript_id | "Novel_002316"; | exon_number | "8";  | gene_type | " |
| Dt_chr2 | Cufflinks | exon | 12586822 | 12586997 | . | + | . | gene_id | "XLOC_167103"; | transcript_id | "Novel_002316"; | exon_number | "9";  | gene_type | " |
| Dt_chr2 | Cufflinks | exon | 12587166 | 12587274 | . | + | . | gene_id | "XLOC_167103"; | transcript_id | "Novel_002316"; | exon_number | "10"; | gene_type | " |
| Dt_chr2 | Cufflinks | exon | 12587830 | 12587910 | . | + | . | gene_id | "XLOC_167103"; | transcript_id | "Novel_002316"; | exon_number | "11"; | gene_type | " |
| Dt_chr2 | Cufflinks | exon | 12588004 | 12588057 | . | + | . | gene_id | "XLOC_167103"; | transcript_id | "Novel_002316"; | exon_number | "12"; | gene_type | " |

|         |           |      |          |          |   |   |   |         |                |               |                 |             |       |           |  |
|---------|-----------|------|----------|----------|---|---|---|---------|----------------|---------------|-----------------|-------------|-------|-----------|--|
| Dt_chr2 | Cufflinks | exon | 12588161 | 12588295 | . | + | . | gene_id | "XLOC_167103"; | transcript_id | "Novel_002316"; | exon_number | "13"; | gene_type |  |
| Dt_chr2 | Cufflinks | exon | 12588481 | 12589090 | . | + | . | gene_id | "XLOC_167103"; | transcript_id | "Novel_002316"; | exon_number | "14"; | gene_type |  |
| Dt_chr2 | Cufflinks | exon | 12585250 | 12585938 | . | + | . | gene_id | "XLOC_167103"; | transcript_id | "Novel_002317"; | exon_number | "1";  | gene_type |  |
| Dt_chr2 | Cufflinks | exon | 12586017 | 12586124 | . | + | . | gene_id | "XLOC_167103"; | transcript_id | "Novel_002317"; | exon_number | "2";  | gene_type |  |
| Dt_chr2 | Cufflinks | exon | 12586585 | 12586658 | . | + | . | gene_id | "XLOC_167103"; | transcript_id | "Novel_002317"; | exon_number | "3";  | gene_type |  |
| Dt_chr2 | Cufflinks | exon | 12586822 | 12587824 | . | + | . | gene_id | "XLOC_167103"; | transcript_id | "Novel_002317"; | exon_number | "4";  | gene_type |  |
| Dt_chr2 | Cufflinks | exon | 12850017 | 12850396 | . | + | . | gene_id | "XLOC_167126"; | transcript_id | "Novel_002318"; | exon_number | "1";  | gene_type |  |
| Dt_chr2 | Cufflinks | exon | 12851149 | 12851509 | . | + | . | gene_id | "XLOC_167126"; | transcript_id | "Novel_002318"; | exon_number | "2";  | gene_type |  |
| Dt_chr2 | Cufflinks | exon | 12852076 | 12852819 | . | + | . | gene_id | "XLOC_167126"; | transcript_id | "Novel_002318"; | exon_number | "3";  | gene_type |  |
| Dt_chr2 | Cufflinks | exon | 12850020 | 12850396 | . | + | . | gene_id | "XLOC_167126"; | transcript_id | "Novel_002319"; | exon_number | "1";  | gene_type |  |
| Dt_chr2 | Cufflinks | exon | 12851149 | 12851909 | . | + | . | gene_id | "XLOC_167126"; | transcript_id | "Novel_002319"; | exon_number | "2";  | gene_type |  |
| Dt_chr2 | Cufflinks | exon | 12917300 | 12917512 | . | + | . | gene_id | "XLOC_167135"; | transcript_id | "Novel_002320"; | exon_number | "1";  | gene_type |  |
| Dt_chr2 | Cufflinks | exon | 12917606 | 12917638 | . | + | . | gene_id | "XLOC_167135"; | transcript_id | "Novel_002320"; | exon_number | "2";  | gene_type |  |
| Dt_chr2 | Cufflinks | exon | 12986941 | 12987305 | . | + | . | gene_id | "XLOC_167151"; | transcript_id | "Novel_002321"; | exon_number | "1";  | gene_type |  |
| Dt_chr2 | Cufflinks | exon | 12988256 | 12989657 | . | + | . | gene_id | "XLOC_167151"; | transcript_id | "Novel_002321"; | exon_number | "2";  | gene_type |  |
| Dt_chr2 | Cufflinks | exon | 13191670 | 13191962 | . | + | . | gene_id | "XLOC_167163"; | transcript_id | "Novel_002322"; | exon_number | "1";  | gene_type |  |
| Dt_chr2 | Cufflinks | exon | 13192652 | 13193894 | . | + | . | gene_id | "XLOC_167163"; | transcript_id | "Novel_002322"; | exon_number | "2";  | gene_type |  |
| Dt_chr2 | Cufflinks | exon | 13648941 | 13649202 | . | + | . | gene_id | "XLOC_167189"; | transcript_id | "Novel_002323"; | exon_number | "1";  | gene_type |  |
| Dt_chr2 | Cufflinks | exon | 13649395 | 13649519 | . | + | . | gene_id | "XLOC_167189"; | transcript_id | "Novel_002323"; | exon_number | "2";  | gene_type |  |
| Dt_chr2 | Cufflinks | exon | 13651012 | 13651061 | . | + | . | gene_id | "XLOC_167189"; | transcript_id | "Novel_002323"; | exon_number | "3";  | gene_type |  |
| Dt_chr2 | Cufflinks | exon | 13651890 | 13651955 | . | + | . | gene_id | "XLOC_167189"; | transcript_id | "Novel_002323"; | exon_number | "4";  | gene_type |  |
| Dt_chr2 | Cufflinks | exon | 13652036 | 13652066 | . | + | . | gene_id | "XLOC_167189"; | transcript_id | "Novel_002323"; | exon_number | "5";  | gene_type |  |
| Dt_chr2 | Cufflinks | exon | 13648941 | 13649519 | . | + | . | gene_id | "XLOC_167189"; | transcript_id | "Novel_002324"; | exon_number | "1";  | gene_type |  |
| Dt_chr2 | Cufflinks | exon | 13651012 | 13651061 | . | + | . | gene_id | "XLOC_167189"; | transcript_id | "Novel_002324"; | exon_number | "2";  | gene_type |  |
| Dt_chr2 | Cufflinks | exon | 13651890 | 13651955 | . | + | . | gene_id | "XLOC_167189"; | transcript_id | "Novel_002324"; | exon_number | "3";  | gene_type |  |
| Dt_chr2 | Cufflinks | exon | 13652036 | 13652066 | . | + | . | gene_id | "XLOC_167189"; | transcript_id | "Novel_002324"; | exon_number | "4";  | gene_type |  |
| Dt_chr2 | Cufflinks | exon | 13656744 | 13657452 | . | + | . | gene_id | "XLOC_167197"; | transcript_id | "Novel_002325"; | exon_number | "1";  | gene_type |  |
| Dt_chr2 | Cufflinks | exon | 13657559 | 13657898 | . | + | . | gene_id | "XLOC_167197"; | transcript_id | "Novel_002325"; | exon_number | "2";  | gene_type |  |
| Dt_chr2 | Cufflinks | exon | 13686817 | 13687035 | . | + | . | gene_id | "XLOC_167206"; | transcript_id | "Novel_002326"; | exon_number | "1";  | gene_type |  |
| Dt_chr2 | Cufflinks | exon | 14056758 | 14057089 | . | + | . | gene_id | "XLOC_167236"; | transcript_id | "Novel_002327"; | exon_number | "1";  | gene_type |  |
| Dt_chr2 | Cufflinks | exon | 14057184 | 14057244 | . | + | . | gene_id | "XLOC_167236"; | transcript_id | "Novel_002327"; | exon_number | "2";  | gene_type |  |
| Dt_chr2 | Cufflinks | exon | 14479133 | 14479906 | . | + | . | gene_id | "XLOC_167276"; | transcript_id | "Novel_002328"; | exon_number | "1";  | gene_type |  |
| Dt_chr2 | Cufflinks | exon | 14480150 | 14480539 | . | + | . | gene_id | "XLOC_167276"; | transcript_id | "Novel_002328"; | exon_number | "2";  | gene_type |  |
| Dt_chr2 | Cufflinks | exon | 14994520 | 14994741 | . | + | . | gene_id | "XLOC_167310"; | transcript_id | "Novel_002329"; | exon_number | "1";  | gene_type |  |
| Dt_chr2 | Cufflinks | exon | 14996532 | 14998107 | . | + | . | gene_id | "XLOC_167310"; | transcript_id | "Novel_002329"; | exon_number | "2";  | gene_type |  |





|         |           |      |          |          |   |   |   |         |                |               |                 |             |      |           |   |
|---------|-----------|------|----------|----------|---|---|---|---------|----------------|---------------|-----------------|-------------|------|-----------|---|
| Dt_chr2 | Cufflinks | exon | 19769373 | 19769555 | . | + | . | gene_id | "XLOC_167646"; | transcript_id | "Novel_002337"; | exon_number | "5"; | gene_type | " |
| Dt_chr2 | Cufflinks | exon | 19769780 | 19770142 | . | + | . | gene_id | "XLOC_167646"; | transcript_id | "Novel_002337"; | exon_number | "6"; | gene_type | " |
| Dt_chr2 | Cufflinks | exon | 19765952 | 19766336 | . | + | . | gene_id | "XLOC_167646"; | transcript_id | "Novel_002338"; | exon_number | "1"; | gene_type | " |
| Dt_chr2 | Cufflinks | exon | 19767245 | 19767384 | . | + | . | gene_id | "XLOC_167646"; | transcript_id | "Novel_002338"; | exon_number | "2"; | gene_type | " |
| Dt_chr2 | Cufflinks | exon | 19767465 | 19767579 | . | + | . | gene_id | "XLOC_167646"; | transcript_id | "Novel_002338"; | exon_number | "3"; | gene_type | " |
| Dt_chr2 | Cufflinks | exon | 19768248 | 19768971 | . | + | . | gene_id | "XLOC_167646"; | transcript_id | "Novel_002338"; | exon_number | "4"; | gene_type | " |
| Dt_chr2 | Cufflinks | exon | 19769373 | 19770150 | . | + | . | gene_id | "XLOC_167646"; | transcript_id | "Novel_002338"; | exon_number | "5"; | gene_type | " |
| Dt_chr2 | Cufflinks | exon | 20271917 | 20272000 | . | + | . | gene_id | "XLOC_167684"; | transcript_id | "Novel_002339"; | exon_number | "1"; | gene_type | " |
| Dt_chr2 | Cufflinks | exon | 20272907 | 20273022 | . | + | . | gene_id | "XLOC_167684"; | transcript_id | "Novel_002339"; | exon_number | "2"; | gene_type | " |
| Dt_chr2 | Cufflinks | exon | 20273117 | 20273351 | . | + | . | gene_id | "XLOC_167684"; | transcript_id | "Novel_002339"; | exon_number | "3"; | gene_type | " |
| Dt_chr2 | Cufflinks | exon | 20948405 | 20948627 | . | + | . | gene_id | "XLOC_167753"; | transcript_id | "Novel_002340"; | exon_number | "1"; | gene_type | " |
| Dt_chr2 | Cufflinks | exon | 21149949 | 21150586 | . | + | . | gene_id | "XLOC_167797"; | transcript_id | "Novel_002341"; | exon_number | "1"; | gene_type | " |
| Dt_chr2 | Cufflinks | exon | 21151391 | 21152588 | . | + | . | gene_id | "XLOC_167797"; | transcript_id | "Novel_002341"; | exon_number | "2"; | gene_type | " |
| Dt_chr2 | Cufflinks | exon | 21152725 | 21153058 | . | + | . | gene_id | "XLOC_167797"; | transcript_id | "Novel_002341"; | exon_number | "3"; | gene_type | " |
| Dt_chr2 | Cufflinks | exon | 21150087 | 21150586 | . | + | . | gene_id | "XLOC_167797"; | transcript_id | "Novel_002342"; | exon_number | "1"; | gene_type | " |
| Dt_chr2 | Cufflinks | exon | 21151391 | 21151525 | . | + | . | gene_id | "XLOC_167797"; | transcript_id | "Novel_002342"; | exon_number | "2"; | gene_type | " |
| Dt_chr2 | Cufflinks | exon | 21152249 | 21152588 | . | + | . | gene_id | "XLOC_167797"; | transcript_id | "Novel_002342"; | exon_number | "3"; | gene_type | " |
| Dt_chr2 | Cufflinks | exon | 21152725 | 21153801 | . | + | . | gene_id | "XLOC_167797"; | transcript_id | "Novel_002342"; | exon_number | "4"; | gene_type | " |
| Dt_chr2 | Cufflinks | exon | 21150087 | 21150586 | . | + | . | gene_id | "XLOC_167797"; | transcript_id | "Novel_002343"; | exon_number | "1"; | gene_type | " |
| Dt_chr2 | Cufflinks | exon | 21151391 | 21152305 | . | + | . | gene_id | "XLOC_167797"; | transcript_id | "Novel_002343"; | exon_number | "2"; | gene_type | " |
| Dt_chr2 | Cufflinks | exon | 21152454 | 21152588 | . | + | . | gene_id | "XLOC_167797"; | transcript_id | "Novel_002343"; | exon_number | "3"; | gene_type | " |
| Dt_chr2 | Cufflinks | exon | 21152725 | 21153801 | . | + | . | gene_id | "XLOC_167797"; | transcript_id | "Novel_002343"; | exon_number | "4"; | gene_type | " |
| Dt_chr2 | Cufflinks | exon | 28157291 | 28157369 | . | + | . | gene_id | "XLOC_168078"; | transcript_id | "Novel_002344"; | exon_number | "1"; | gene_type | " |
| Dt_chr2 | Cufflinks | exon | 28158029 | 28159825 | . | + | . | gene_id | "XLOC_168078"; | transcript_id | "Novel_002344"; | exon_number | "2"; | gene_type | " |
| Dt_chr2 | Cufflinks | exon | 29718279 | 29718300 | . | + | . | gene_id | "XLOC_168168"; | transcript_id | "Novel_002345"; | exon_number | "1"; | gene_type | " |
| Dt_chr2 | Cufflinks | exon | 29718393 | 29720441 | . | + | . | gene_id | "XLOC_168168"; | transcript_id | "Novel_002345"; | exon_number | "2"; | gene_type | " |
| Dt_chr2 | Cufflinks | exon | 29968968 | 29969434 | . | + | . | gene_id | "XLOC_168202"; | transcript_id | "Novel_002346"; | exon_number | "1"; | gene_type | " |
| Dt_chr2 | Cufflinks | exon | 29970438 | 29970501 | . | + | . | gene_id | "XLOC_168202"; | transcript_id | "Novel_002346"; | exon_number | "2"; | gene_type | " |
| Dt_chr2 | Cufflinks | exon | 29970743 | 29970857 | . | + | . | gene_id | "XLOC_168202"; | transcript_id | "Novel_002346"; | exon_number | "3"; | gene_type | " |
| Dt_chr2 | Cufflinks | exon | 29970995 | 29971094 | . | + | . | gene_id | "XLOC_168202"; | transcript_id | "Novel_002346"; | exon_number | "4"; | gene_type | " |
| Dt_chr2 | Cufflinks | exon | 29971711 | 29971757 | . | + | . | gene_id | "XLOC_168202"; | transcript_id | "Novel_002346"; | exon_number | "5"; | gene_type | " |
| Dt_chr2 | Cufflinks | exon | 29973172 | 29973620 | . | + | . | gene_id | "XLOC_168202"; | transcript_id | "Novel_002346"; | exon_number | "6"; | gene_type | " |
| Dt_chr2 | Cufflinks | exon | 29970292 | 29971757 | . | + | . | gene_id | "XLOC_168202"; | transcript_id | "Novel_002347"; | exon_number | "1"; | gene_type | " |
| Dt_chr2 | Cufflinks | exon | 29973172 | 29973380 | . | + | . | gene_id | "XLOC_168202"; | transcript_id | "Novel_002347"; | exon_number | "2"; | gene_type | " |
| Dt_chr2 | Cufflinks | exon | 30819228 | 30819309 | . | + | . | gene_id | "XLOC_168266"; | transcript_id | "Novel_002348"; | exon_number | "1"; | gene_type | " |

|         |           |      |          |          |   |   |   |         |                |               |                 |             |      |           |   |
|---------|-----------|------|----------|----------|---|---|---|---------|----------------|---------------|-----------------|-------------|------|-----------|---|
| Dt_chr2 | Cufflinks | exon | 30819414 | 30819890 | . | + | . | gene_id | "XLOC_168266"; | transcript_id | "Novel_002348"; | exon_number | "2"; | gene_type | " |
| Dt_chr2 | Cufflinks | exon | 33181553 | 33182563 | . | + | . | gene_id | "XLOC_168406"; | transcript_id | "Novel_002349"; | exon_number | "1"; | gene_type | " |
| Dt_chr2 | Cufflinks | exon | 33183193 | 33187977 | . | + | . | gene_id | "XLOC_168406"; | transcript_id | "Novel_002349"; | exon_number | "2"; | gene_type | " |
| Dt_chr2 | Cufflinks | exon | 37730708 | 37731877 | . | + | . | gene_id | "XLOC_168694"; | transcript_id | "Novel_002350"; | exon_number | "1"; | gene_type | " |
| Dt_chr2 | Cufflinks | exon | 37732029 | 37732104 | . | + | . | gene_id | "XLOC_168694"; | transcript_id | "Novel_002350"; | exon_number | "2"; | gene_type | " |
| Dt_chr2 | Cufflinks | exon | 37733402 | 37733471 | . | + | . | gene_id | "XLOC_168694"; | transcript_id | "Novel_002350"; | exon_number | "3"; | gene_type | " |
| Dt_chr2 | Cufflinks | exon | 37733779 | 37733880 | . | + | . | gene_id | "XLOC_168694"; | transcript_id | "Novel_002350"; | exon_number | "4"; | gene_type | " |
| Dt_chr2 | Cufflinks | exon | 37736519 | 37737069 | . | + | . | gene_id | "XLOC_168694"; | transcript_id | "Novel_002350"; | exon_number | "5"; | gene_type | " |
| Dt_chr2 | Cufflinks | exon | 37730709 | 37731877 | . | + | . | gene_id | "XLOC_168694"; | transcript_id | "Novel_002351"; | exon_number | "1"; | gene_type | " |
| Dt_chr2 | Cufflinks | exon | 37732003 | 37732104 | . | + | . | gene_id | "XLOC_168694"; | transcript_id | "Novel_002351"; | exon_number | "2"; | gene_type | " |
| Dt_chr2 | Cufflinks | exon | 37733402 | 37733471 | . | + | . | gene_id | "XLOC_168694"; | transcript_id | "Novel_002351"; | exon_number | "3"; | gene_type | " |
| Dt_chr2 | Cufflinks | exon | 37733779 | 37733880 | . | + | . | gene_id | "XLOC_168694"; | transcript_id | "Novel_002351"; | exon_number | "4"; | gene_type | " |
| Dt_chr2 | Cufflinks | exon | 37736519 | 37737061 | . | + | . | gene_id | "XLOC_168694"; | transcript_id | "Novel_002351"; | exon_number | "5"; | gene_type | " |
| Dt_chr2 | Cufflinks | exon | 37730716 | 37732104 | . | + | . | gene_id | "XLOC_168694"; | transcript_id | "Novel_002352"; | exon_number | "1"; | gene_type | " |
| Dt_chr2 | Cufflinks | exon | 37733402 | 37733471 | . | + | . | gene_id | "XLOC_168694"; | transcript_id | "Novel_002352"; | exon_number | "2"; | gene_type | " |
| Dt_chr2 | Cufflinks | exon | 37733779 | 37733880 | . | + | . | gene_id | "XLOC_168694"; | transcript_id | "Novel_002352"; | exon_number | "3"; | gene_type | " |
| Dt_chr2 | Cufflinks | exon | 37736519 | 37737182 | . | + | . | gene_id | "XLOC_168694"; | transcript_id | "Novel_002352"; | exon_number | "4"; | gene_type | " |
| Dt_chr2 | Cufflinks | exon | 39408563 | 39408825 | . | + | . | gene_id | "XLOC_168841"; | transcript_id | "Novel_002353"; | exon_number | "1"; | gene_type | " |
| Dt_chr2 | Cufflinks | exon | 39408928 | 39409167 | . | + | . | gene_id | "XLOC_168841"; | transcript_id | "Novel_002353"; | exon_number | "2"; | gene_type | " |
| Dt_chr2 | Cufflinks | exon | 39419796 | 39420038 | . | + | . | gene_id | "XLOC_168850"; | transcript_id | "Novel_002354"; | exon_number | "1"; | gene_type | " |
| Dt_chr2 | Cufflinks | exon | 39420657 | 39420766 | . | + | . | gene_id | "XLOC_168850"; | transcript_id | "Novel_002354"; | exon_number | "2"; | gene_type | " |
| Dt_chr2 | Cufflinks | exon | 39420866 | 39420987 | . | + | . | gene_id | "XLOC_168850"; | transcript_id | "Novel_002354"; | exon_number | "3"; | gene_type | " |
| Dt_chr2 | Cufflinks | exon | 39421067 | 39421445 | . | + | . | gene_id | "XLOC_168850"; | transcript_id | "Novel_002354"; | exon_number | "4"; | gene_type | " |
| Dt_chr2 | Cufflinks | exon | 39419796 | 39420038 | . | + | . | gene_id | "XLOC_168850"; | transcript_id | "Novel_002355"; | exon_number | "1"; | gene_type | " |
| Dt_chr2 | Cufflinks | exon | 39420657 | 39420766 | . | + | . | gene_id | "XLOC_168850"; | transcript_id | "Novel_002355"; | exon_number | "2"; | gene_type | " |
| Dt_chr2 | Cufflinks | exon | 39420866 | 39421445 | . | + | . | gene_id | "XLOC_168850"; | transcript_id | "Novel_002355"; | exon_number | "3"; | gene_type | " |
| Dt_chr2 | Cufflinks | exon | 39420495 | 39420766 | . | + | . | gene_id | "XLOC_168850"; | transcript_id | "Novel_002356"; | exon_number | "1"; | gene_type | " |
| Dt_chr2 | Cufflinks | exon | 39420866 | 39420987 | . | + | . | gene_id | "XLOC_168850"; | transcript_id | "Novel_002356"; | exon_number | "2"; | gene_type | " |
| Dt_chr2 | Cufflinks | exon | 39421067 | 39421485 | . | + | . | gene_id | "XLOC_168850"; | transcript_id | "Novel_002356"; | exon_number | "3"; | gene_type | " |
| Dt_chr2 | Cufflinks | exon | 41134246 | 41134475 | . | + | . | gene_id | "XLOC_168977"; | transcript_id | "Novel_002357"; | exon_number | "1"; | gene_type | " |
| Dt_chr2 | Cufflinks | exon | 41134568 | 41134665 | . | + | . | gene_id | "XLOC_168977"; | transcript_id | "Novel_002357"; | exon_number | "2"; | gene_type | " |
| Dt_chr2 | Cufflinks | exon | 41134757 | 41134787 | . | + | . | gene_id | "XLOC_168977"; | transcript_id | "Novel_002357"; | exon_number | "3"; | gene_type | " |
| Dt_chr2 | Cufflinks | exon | 41134872 | 41134971 | . | + | . | gene_id | "XLOC_168977"; | transcript_id | "Novel_002357"; | exon_number | "4"; | gene_type | " |
| Dt_chr2 | Cufflinks | exon | 41135048 | 41135118 | . | + | . | gene_id | "XLOC_168977"; | transcript_id | "Novel_002357"; | exon_number | "5"; | gene_type | " |
| Dt_chr2 | Cufflinks | exon | 41135222 | 41135365 | . | + | . | gene_id | "XLOC_168977"; | transcript_id | "Novel_002357"; | exon_number | "6"; | gene_type | " |

|         |           |      |          |          |   |   |   |         |                |               |                 |             |      |           |   |
|---------|-----------|------|----------|----------|---|---|---|---------|----------------|---------------|-----------------|-------------|------|-----------|---|
| Dt_chr2 | Cufflinks | exon | 41135451 | 41136136 | . | + | . | gene_id | "XLOC_168977"; | transcript_id | "Novel_002357"; | exon_number | "7"; | gene_type | " |
| Dt_chr2 | Cufflinks | exon | 43170684 | 43170810 | . | + | . | gene_id | "XLOC_169160"; | transcript_id | "Novel_002358"; | exon_number | "1"; | gene_type | " |
| Dt_chr2 | Cufflinks | exon | 43171963 | 43172025 | . | + | . | gene_id | "XLOC_169160"; | transcript_id | "Novel_002358"; | exon_number | "2"; | gene_type | " |
| Dt_chr2 | Cufflinks | exon | 43172096 | 43172175 | . | + | . | gene_id | "XLOC_169160"; | transcript_id | "Novel_002358"; | exon_number | "3"; | gene_type | " |
| Dt_chr2 | Cufflinks | exon | 43172289 | 43172330 | . | + | . | gene_id | "XLOC_169160"; | transcript_id | "Novel_002358"; | exon_number | "4"; | gene_type | " |
| Dt_chr2 | Cufflinks | exon | 43172422 | 43173326 | . | + | . | gene_id | "XLOC_169160"; | transcript_id | "Novel_002358"; | exon_number | "5"; | gene_type | " |
| Dt_chr2 | Cufflinks | exon | 43171602 | 43172025 | . | + | . | gene_id | "XLOC_169160"; | transcript_id | "Novel_002359"; | exon_number | "1"; | gene_type | " |
| Dt_chr2 | Cufflinks | exon | 43172096 | 43172175 | . | + | . | gene_id | "XLOC_169160"; | transcript_id | "Novel_002359"; | exon_number | "2"; | gene_type | " |
| Dt_chr2 | Cufflinks | exon | 43172422 | 43172761 | . | + | . | gene_id | "XLOC_169160"; | transcript_id | "Novel_002359"; | exon_number | "3"; | gene_type | " |
| Dt_chr2 | Cufflinks | exon | 44218136 | 44220557 | . | + | . | gene_id | "XLOC_169262"; | transcript_id | "Novel_002360"; | exon_number | "1"; | gene_type | " |
| Dt_chr2 | Cufflinks | exon | 44227659 | 44229533 | . | + | . | gene_id | "XLOC_169264"; | transcript_id | "Novel_002361"; | exon_number | "1"; | gene_type | " |
| Dt_chr2 | Cufflinks | exon | 44258553 | 44258689 | . | + | . | gene_id | "XLOC_169272"; | transcript_id | "Novel_002362"; | exon_number | "1"; | gene_type | " |
| Dt_chr2 | Cufflinks | exon | 44258800 | 44258907 | . | + | . | gene_id | "XLOC_169272"; | transcript_id | "Novel_002362"; | exon_number | "2"; | gene_type | " |
| Dt_chr2 | Cufflinks | exon | 44259875 | 44259956 | . | + | . | gene_id | "XLOC_169272"; | transcript_id | "Novel_002362"; | exon_number | "3"; | gene_type | " |
| Dt_chr2 | Cufflinks | exon | 44260188 | 44260317 | . | + | . | gene_id | "XLOC_169272"; | transcript_id | "Novel_002362"; | exon_number | "4"; | gene_type | " |
| Dt_chr2 | Cufflinks | exon | 44260412 | 44260554 | . | + | . | gene_id | "XLOC_169272"; | transcript_id | "Novel_002362"; | exon_number | "5"; | gene_type | " |
| Dt_chr2 | Cufflinks | exon | 44260637 | 44260723 | . | + | . | gene_id | "XLOC_169272"; | transcript_id | "Novel_002362"; | exon_number | "6"; | gene_type | " |
| Dt_chr2 | Cufflinks | exon | 44261599 | 44261872 | . | + | . | gene_id | "XLOC_169272"; | transcript_id | "Novel_002362"; | exon_number | "7"; | gene_type | " |
| Dt_chr2 | Cufflinks | exon | 44258554 | 44258689 | . | + | . | gene_id | "XLOC_169272"; | transcript_id | "Novel_002363"; | exon_number | "1"; | gene_type | " |
| Dt_chr2 | Cufflinks | exon | 44258800 | 44258907 | . | + | . | gene_id | "XLOC_169272"; | transcript_id | "Novel_002363"; | exon_number | "2"; | gene_type | " |
| Dt_chr2 | Cufflinks | exon | 44259875 | 44259956 | . | + | . | gene_id | "XLOC_169272"; | transcript_id | "Novel_002363"; | exon_number | "3"; | gene_type | " |
| Dt_chr2 | Cufflinks | exon | 44260188 | 44260554 | . | + | . | gene_id | "XLOC_169272"; | transcript_id | "Novel_002363"; | exon_number | "4"; | gene_type | " |
| Dt_chr2 | Cufflinks | exon | 44260637 | 44260723 | . | + | . | gene_id | "XLOC_169272"; | transcript_id | "Novel_002363"; | exon_number | "5"; | gene_type | " |
| Dt_chr2 | Cufflinks | exon | 44261599 | 44261924 | . | + | . | gene_id | "XLOC_169272"; | transcript_id | "Novel_002363"; | exon_number | "6"; | gene_type | " |
| Dt_chr2 | Cufflinks | exon | 45829936 | 45830166 | . | + | . | gene_id | "XLOC_169490"; | transcript_id | "Novel_002364"; | exon_number | "1"; | gene_type | " |
| Dt_chr2 | Cufflinks | exon | 45830333 | 45830448 | . | + | . | gene_id | "XLOC_169490"; | transcript_id | "Novel_002364"; | exon_number | "2"; | gene_type | " |
| Dt_chr2 | Cufflinks | exon | 45830865 | 45831603 | . | + | . | gene_id | "XLOC_169490"; | transcript_id | "Novel_002364"; | exon_number | "3"; | gene_type | " |
| Dt_chr2 | Cufflinks | exon | 45829937 | 45830166 | . | + | . | gene_id | "XLOC_169490"; | transcript_id | "Novel_002365"; | exon_number | "1"; | gene_type | " |
| Dt_chr2 | Cufflinks | exon | 45830333 | 45831149 | . | + | . | gene_id | "XLOC_169490"; | transcript_id | "Novel_002365"; | exon_number | "2"; | gene_type | " |
| Dt_chr2 | Cufflinks | exon | 46047971 | 46049178 | . | + | . | gene_id | "XLOC_169507"; | transcript_id | "Novel_002366"; | exon_number | "1"; | gene_type | " |
| Dt_chr2 | Cufflinks | exon | 47055651 | 47056751 | . | + | . | gene_id | "XLOC_169613"; | transcript_id | "Novel_002367"; | exon_number | "1"; | gene_type | " |
| Dt_chr2 | Cufflinks | exon | 50133092 | 50133246 | . | + | . | gene_id | "XLOC_169895"; | transcript_id | "Novel_002368"; | exon_number | "1"; | gene_type | " |
| Dt_chr2 | Cufflinks | exon | 50133353 | 50133575 | . | + | . | gene_id | "XLOC_169895"; | transcript_id | "Novel_002368"; | exon_number | "2"; | gene_type | " |
| Dt_chr2 | Cufflinks | exon | 436636   | 436677   | . | - | . | gene_id | "XLOC_169920"; | transcript_id | "Novel_002369"; | exon_number | "1"; | gene_type | " |
| Dt_chr2 | Cufflinks | exon | 437641   | 437947   | . | - | . | gene_id | "XLOC_169920"; | transcript_id | "Novel_002369"; | exon_number | "2"; | gene_type | " |

|         |           |      |          |          |   |   |         |                |               |                 |             |      |           |   |
|---------|-----------|------|----------|----------|---|---|---------|----------------|---------------|-----------------|-------------|------|-----------|---|
| Dt_chr2 | Cufflinks | exon | 7707930  | 7708369  | . | . | gene_id | "XLOC_170271"; | transcript_id | "Novel_002370"; | exon_number | "1"; | gene_type | " |
| Dt_chr2 | Cufflinks | exon | 7708856  | 7709135  | . | . | gene_id | "XLOC_170271"; | transcript_id | "Novel_002370"; | exon_number | "2"; | gene_type | " |
| Dt_chr2 | Cufflinks | exon | 7710527  | 7710707  | . | . | gene_id | "XLOC_170271"; | transcript_id | "Novel_002370"; | exon_number | "3"; | gene_type | " |
| Dt_chr2 | Cufflinks | exon | 10702294 | 10702510 | . | . | gene_id | "XLOC_170598"; | transcript_id | "Novel_002371"; | exon_number | "1"; | gene_type | " |
| Dt_chr2 | Cufflinks | exon | 10702699 | 10702833 | . | . | gene_id | "XLOC_170598"; | transcript_id | "Novel_002371"; | exon_number | "2"; | gene_type | " |
| Dt_chr2 | Cufflinks | exon | 10703430 | 10703550 | . | . | gene_id | "XLOC_170598"; | transcript_id | "Novel_002371"; | exon_number | "3"; | gene_type | " |
| Dt_chr2 | Cufflinks | exon | 10703891 | 10704031 | . | . | gene_id | "XLOC_170598"; | transcript_id | "Novel_002371"; | exon_number | "4"; | gene_type | " |
| Dt_chr2 | Cufflinks | exon | 10704184 | 10704357 | . | . | gene_id | "XLOC_170598"; | transcript_id | "Novel_002371"; | exon_number | "5"; | gene_type | " |
| Dt_chr2 | Cufflinks | exon | 10704556 | 10705531 | . | . | gene_id | "XLOC_170598"; | transcript_id | "Novel_002371"; | exon_number | "6"; | gene_type | " |
| Dt_chr2 | Cufflinks | exon | 10702312 | 10702528 | . | . | gene_id | "XLOC_170598"; | transcript_id | "Novel_002372"; | exon_number | "1"; | gene_type | " |
| Dt_chr2 | Cufflinks | exon | 10702699 | 10702833 | . | . | gene_id | "XLOC_170598"; | transcript_id | "Novel_002372"; | exon_number | "2"; | gene_type | " |
| Dt_chr2 | Cufflinks | exon | 10703430 | 10703550 | . | . | gene_id | "XLOC_170598"; | transcript_id | "Novel_002372"; | exon_number | "3"; | gene_type | " |
| Dt_chr2 | Cufflinks | exon | 10703891 | 10704031 | . | . | gene_id | "XLOC_170598"; | transcript_id | "Novel_002372"; | exon_number | "4"; | gene_type | " |
| Dt_chr2 | Cufflinks | exon | 10704180 | 10704357 | . | . | gene_id | "XLOC_170598"; | transcript_id | "Novel_002372"; | exon_number | "5"; | gene_type | " |
| Dt_chr2 | Cufflinks | exon | 10704556 | 10705585 | . | . | gene_id | "XLOC_170598"; | transcript_id | "Novel_002372"; | exon_number | "6"; | gene_type | " |
| Dt_chr2 | Cufflinks | exon | 10705700 | 10706250 | . | . | gene_id | "XLOC_170598"; | transcript_id | "Novel_002373"; | exon_number | "1"; | gene_type | " |
| Dt_chr2 | Cufflinks | exon | 10706729 | 10706770 | . | . | gene_id | "XLOC_170598"; | transcript_id | "Novel_002373"; | exon_number | "2"; | gene_type | " |
| Dt_chr2 | Cufflinks | exon | 10706974 | 10708495 | . | . | gene_id | "XLOC_170598"; | transcript_id | "Novel_002373"; | exon_number | "3"; | gene_type | " |
| Dt_chr2 | Cufflinks | exon | 10767058 | 10767987 | . | . | gene_id | "XLOC_170605"; | transcript_id | "Novel_002374"; | exon_number | "1"; | gene_type | " |
| Dt_chr2 | Cufflinks | exon | 10768089 | 10770929 | . | . | gene_id | "XLOC_170605"; | transcript_id | "Novel_002374"; | exon_number | "2"; | gene_type | " |
| Dt_chr2 | Cufflinks | exon | 10900118 | 10900720 | . | . | gene_id | "XLOC_170631"; | transcript_id | "Novel_002375"; | exon_number | "1"; | gene_type | " |
| Dt_chr2 | Cufflinks | exon | 10900804 | 10900919 | . | . | gene_id | "XLOC_170631"; | transcript_id | "Novel_002375"; | exon_number | "2"; | gene_type | " |
| Dt_chr2 | Cufflinks | exon | 10904115 | 10904383 | . | . | gene_id | "XLOC_170631"; | transcript_id | "Novel_002375"; | exon_number | "3"; | gene_type | " |
| Dt_chr2 | Cufflinks | exon | 11049892 | 11050309 | . | . | gene_id | "XLOC_170676"; | transcript_id | "Novel_002376"; | exon_number | "1"; | gene_type | " |
| Dt_chr2 | Cufflinks | exon | 11050440 | 11050730 | . | . | gene_id | "XLOC_170676"; | transcript_id | "Novel_002376"; | exon_number | "2"; | gene_type | " |
| Dt_chr2 | Cufflinks | exon | 11051443 | 11052245 | . | . | gene_id | "XLOC_170678"; | transcript_id | "Novel_002377"; | exon_number | "1"; | gene_type | " |
| Dt_chr2 | Cufflinks | exon | 11052687 | 11052841 | . | . | gene_id | "XLOC_170678"; | transcript_id | "Novel_002377"; | exon_number | "2"; | gene_type | " |
| Dt_chr2 | Cufflinks | exon | 11053157 | 11053401 | . | . | gene_id | "XLOC_170678"; | transcript_id | "Novel_002377"; | exon_number | "3"; | gene_type | " |
| Dt_chr2 | Cufflinks | exon | 11054052 | 11054346 | . | . | gene_id | "XLOC_170678"; | transcript_id | "Novel_002377"; | exon_number | "4"; | gene_type | " |
| Dt_chr2 | Cufflinks | exon | 11054547 | 11055540 | . | . | gene_id | "XLOC_170678"; | transcript_id | "Novel_002377"; | exon_number | "5"; | gene_type | " |
| Dt_chr2 | Cufflinks | exon | 11056363 | 11056480 | . | . | gene_id | "XLOC_170678"; | transcript_id | "Novel_002377"; | exon_number | "6"; | gene_type | " |
| Dt_chr2 | Cufflinks | exon | 11051682 | 11052245 | . | . | gene_id | "XLOC_170678"; | transcript_id | "Novel_002378"; | exon_number | "1"; | gene_type | " |
| Dt_chr2 | Cufflinks | exon | 11052687 | 11053401 | . | . | gene_id | "XLOC_170678"; | transcript_id | "Novel_002378"; | exon_number | "2"; | gene_type | " |
| Dt_chr2 | Cufflinks | exon | 11054052 | 11054346 | . | . | gene_id | "XLOC_170678"; | transcript_id | "Novel_002378"; | exon_number | "3"; | gene_type | " |
| Dt_chr2 | Cufflinks | exon | 11054547 | 11055979 | . | . | gene_id | "XLOC_170678"; | transcript_id | "Novel_002378"; | exon_number | "4"; | gene_type | " |

|         |           |      |          |          |   |   |         |                |               |                 |             |      |           |   |
|---------|-----------|------|----------|----------|---|---|---------|----------------|---------------|-----------------|-------------|------|-----------|---|
| Dt_chr2 | Cufflinks | exon | 11051794 | 11052245 | . | . | gene_id | "XLOC_170678"; | transcript_id | "Novel_002379"; | exon_number | "1"; | gene_type | " |
| Dt_chr2 | Cufflinks | exon | 11052687 | 11052841 | . | . | gene_id | "XLOC_170678"; | transcript_id | "Novel_002379"; | exon_number | "2"; | gene_type | " |
| Dt_chr2 | Cufflinks | exon | 11053157 | 11053401 | . | . | gene_id | "XLOC_170678"; | transcript_id | "Novel_002379"; | exon_number | "3"; | gene_type | " |
| Dt_chr2 | Cufflinks | exon | 11054052 | 11054346 | . | . | gene_id | "XLOC_170678"; | transcript_id | "Novel_002379"; | exon_number | "4"; | gene_type | " |
| Dt_chr2 | Cufflinks | exon | 11054547 | 11056181 | . | . | gene_id | "XLOC_170678"; | transcript_id | "Novel_002379"; | exon_number | "5"; | gene_type | " |
| Dt_chr2 | Cufflinks | exon | 11344932 | 11349692 | . | . | gene_id | "XLOC_170719"; | transcript_id | "Novel_002380"; | exon_number | "1"; | gene_type | " |
| Dt_chr2 | Cufflinks | exon | 11350128 | 11350287 | . | . | gene_id | "XLOC_170719"; | transcript_id | "Novel_002380"; | exon_number | "2"; | gene_type | " |
| Dt_chr2 | Cufflinks | exon | 11414468 | 11414491 | . | . | gene_id | "XLOC_170726"; | transcript_id | "Novel_002381"; | exon_number | "1"; | gene_type | " |
| Dt_chr2 | Cufflinks | exon | 11414784 | 11414864 | . | . | gene_id | "XLOC_170726"; | transcript_id | "Novel_002381"; | exon_number | "2"; | gene_type | " |
| Dt_chr2 | Cufflinks | exon | 11415027 | 11415238 | . | . | gene_id | "XLOC_170726"; | transcript_id | "Novel_002381"; | exon_number | "3"; | gene_type | " |
| Dt_chr2 | Cufflinks | exon | 11517819 | 11518189 | . | . | gene_id | "XLOC_170736"; | transcript_id | "Novel_002382"; | exon_number | "1"; | gene_type | " |
| Dt_chr2 | Cufflinks | exon | 11518512 | 11518595 | . | . | gene_id | "XLOC_170736"; | transcript_id | "Novel_002382"; | exon_number | "2"; | gene_type | " |
| Dt_chr2 | Cufflinks | exon | 11518694 | 11519412 | . | . | gene_id | "XLOC_170736"; | transcript_id | "Novel_002382"; | exon_number | "3"; | gene_type | " |
| Dt_chr2 | Cufflinks | exon | 11520565 | 11520678 | . | . | gene_id | "XLOC_170736"; | transcript_id | "Novel_002382"; | exon_number | "4"; | gene_type | " |
| Dt_chr2 | Cufflinks | exon | 11573176 | 11574057 | . | . | gene_id | "XLOC_170744"; | transcript_id | "Novel_002383"; | exon_number | "1"; | gene_type | " |
| Dt_chr2 | Cufflinks | exon | 11575312 | 11575390 | . | . | gene_id | "XLOC_170744"; | transcript_id | "Novel_002383"; | exon_number | "2"; | gene_type | " |
| Dt_chr2 | Cufflinks | exon | 11575538 | 11575627 | . | . | gene_id | "XLOC_170744"; | transcript_id | "Novel_002383"; | exon_number | "3"; | gene_type | " |
| Dt_chr2 | Cufflinks | exon | 11575729 | 11575970 | . | . | gene_id | "XLOC_170744"; | transcript_id | "Novel_002383"; | exon_number | "4"; | gene_type | " |
| Dt_chr2 | Cufflinks | exon | 11577314 | 11577409 | . | . | gene_id | "XLOC_170744"; | transcript_id | "Novel_002383"; | exon_number | "5"; | gene_type | " |
| Dt_chr2 | Cufflinks | exon | 11578751 | 11578920 | . | . | gene_id | "XLOC_170744"; | transcript_id | "Novel_002383"; | exon_number | "6"; | gene_type | " |
| Dt_chr2 | Cufflinks | exon | 11574478 | 11575390 | . | . | gene_id | "XLOC_170744"; | transcript_id | "Novel_002384"; | exon_number | "1"; | gene_type | " |
| Dt_chr2 | Cufflinks | exon | 11575538 | 11575627 | . | . | gene_id | "XLOC_170744"; | transcript_id | "Novel_002384"; | exon_number | "2"; | gene_type | " |
| Dt_chr2 | Cufflinks | exon | 11575729 | 11575970 | . | . | gene_id | "XLOC_170744"; | transcript_id | "Novel_002384"; | exon_number | "3"; | gene_type | " |
| Dt_chr2 | Cufflinks | exon | 11577314 | 11577409 | . | . | gene_id | "XLOC_170744"; | transcript_id | "Novel_002384"; | exon_number | "4"; | gene_type | " |
| Dt_chr2 | Cufflinks | exon | 11578751 | 11578871 | . | . | gene_id | "XLOC_170744"; | transcript_id | "Novel_002384"; | exon_number | "5"; | gene_type | " |
| Dt_chr2 | Cufflinks | exon | 11889795 | 11890363 | . | . | gene_id | "XLOC_170782"; | transcript_id | "Novel_002385"; | exon_number | "1"; | gene_type | " |
| Dt_chr2 | Cufflinks | exon | 11890438 | 11890524 | . | . | gene_id | "XLOC_170782"; | transcript_id | "Novel_002385"; | exon_number | "2"; | gene_type | " |
| Dt_chr2 | Cufflinks | exon | 11890649 | 11890885 | . | . | gene_id | "XLOC_170782"; | transcript_id | "Novel_002385"; | exon_number | "3"; | gene_type | " |
| Dt_chr2 | Cufflinks | exon | 11890985 | 11891096 | . | . | gene_id | "XLOC_170782"; | transcript_id | "Novel_002385"; | exon_number | "4"; | gene_type | " |
| Dt_chr2 | Cufflinks | exon | 11891716 | 11892032 | . | . | gene_id | "XLOC_170782"; | transcript_id | "Novel_002385"; | exon_number | "5"; | gene_type | " |
| Dt_chr2 | Cufflinks | exon | 11892314 | 11892529 | . | . | gene_id | "XLOC_170782"; | transcript_id | "Novel_002385"; | exon_number | "6"; | gene_type | " |
| Dt_chr2 | Cufflinks | exon | 11893810 | 11894149 | . | . | gene_id | "XLOC_170782"; | transcript_id | "Novel_002385"; | exon_number | "7"; | gene_type | " |
| Dt_chr2 | Cufflinks | exon | 11889803 | 11890524 | . | . | gene_id | "XLOC_170782"; | transcript_id | "Novel_002386"; | exon_number | "1"; | gene_type | " |
| Dt_chr2 | Cufflinks | exon | 11890649 | 11890885 | . | . | gene_id | "XLOC_170782"; | transcript_id | "Novel_002386"; | exon_number | "2"; | gene_type | " |
| Dt_chr2 | Cufflinks | exon | 11890985 | 11891096 | . | . | gene_id | "XLOC_170782"; | transcript_id | "Novel_002386"; | exon_number | "3"; | gene_type | " |

|         |           |      |          |          |   |   |         |                |               |                 |             |      |           |   |
|---------|-----------|------|----------|----------|---|---|---------|----------------|---------------|-----------------|-------------|------|-----------|---|
| Dt_chr2 | Cufflinks | exon | 11891716 | 11892032 | . | . | gene_id | "XLOC_170782"; | transcript_id | "Novel_002386"; | exon_number | "4"; | gene_type | " |
| Dt_chr2 | Cufflinks | exon | 11892314 | 11892529 | . | . | gene_id | "XLOC_170782"; | transcript_id | "Novel_002386"; | exon_number | "5"; | gene_type | " |
| Dt_chr2 | Cufflinks | exon | 11893810 | 11893920 | . | . | gene_id | "XLOC_170782"; | transcript_id | "Novel_002386"; | exon_number | "6"; | gene_type | " |
| Dt_chr2 | Cufflinks | exon | 11889805 | 11890524 | . | . | gene_id | "XLOC_170782"; | transcript_id | "Novel_002387"; | exon_number | "1"; | gene_type | " |
| Dt_chr2 | Cufflinks | exon | 11890649 | 11890885 | . | . | gene_id | "XLOC_170782"; | transcript_id | "Novel_002387"; | exon_number | "2"; | gene_type | " |
| Dt_chr2 | Cufflinks | exon | 11890985 | 11891096 | . | . | gene_id | "XLOC_170782"; | transcript_id | "Novel_002387"; | exon_number | "3"; | gene_type | " |
| Dt_chr2 | Cufflinks | exon | 11891716 | 11892032 | . | . | gene_id | "XLOC_170782"; | transcript_id | "Novel_002387"; | exon_number | "4"; | gene_type | " |
| Dt_chr2 | Cufflinks | exon | 11892314 | 11892942 | . | . | gene_id | "XLOC_170782"; | transcript_id | "Novel_002387"; | exon_number | "5"; | gene_type | " |
| Dt_chr2 | Cufflinks | exon | 12666380 | 12667100 | . | . | gene_id | "XLOC_170822"; | transcript_id | "Novel_002388"; | exon_number | "1"; | gene_type | " |
| Dt_chr2 | Cufflinks | exon | 12668019 | 12668228 | . | . | gene_id | "XLOC_170822"; | transcript_id | "Novel_002388"; | exon_number | "2"; | gene_type | " |
| Dt_chr2 | Cufflinks | exon | 12666404 | 12666413 | . | . | gene_id | "XLOC_170822"; | transcript_id | "Novel_002389"; | exon_number | "1"; | gene_type | " |
| Dt_chr2 | Cufflinks | exon | 12666989 | 12668261 | . | . | gene_id | "XLOC_170822"; | transcript_id | "Novel_002389"; | exon_number | "2"; | gene_type | " |
| Dt_chr2 | Cufflinks | exon | 12770264 | 12770393 | . | . | gene_id | "XLOC_170835"; | transcript_id | "Novel_002390"; | exon_number | "1"; | gene_type | " |
| Dt_chr2 | Cufflinks | exon | 12770467 | 12770570 | . | . | gene_id | "XLOC_170835"; | transcript_id | "Novel_002390"; | exon_number | "2"; | gene_type | " |
| Dt_chr2 | Cufflinks | exon | 12770732 | 12770955 | . | . | gene_id | "XLOC_170836"; | transcript_id | "Novel_002391"; | exon_number | "1"; | gene_type | " |
| Dt_chr2 | Cufflinks | exon | 12771046 | 12771111 | . | . | gene_id | "XLOC_170836"; | transcript_id | "Novel_002391"; | exon_number | "2"; | gene_type | " |
| Dt_chr2 | Cufflinks | exon | 13152219 | 13152914 | . | . | gene_id | "XLOC_170868"; | transcript_id | "Novel_002392"; | exon_number | "1"; | gene_type | " |
| Dt_chr2 | Cufflinks | exon | 13153000 | 13153613 | . | . | gene_id | "XLOC_170868"; | transcript_id | "Novel_002392"; | exon_number | "2"; | gene_type | " |
| Dt_chr2 | Cufflinks | exon | 13939211 | 13939936 | . | . | gene_id | "XLOC_170939"; | transcript_id | "Novel_002393"; | exon_number | "1"; | gene_type | " |
| Dt_chr2 | Cufflinks | exon | 13940057 | 13940128 | . | . | gene_id | "XLOC_170939"; | transcript_id | "Novel_002393"; | exon_number | "2"; | gene_type | " |
| Dt_chr2 | Cufflinks | exon | 14478463 | 14479684 | . | . | gene_id | "XLOC_170970"; | transcript_id | "Novel_002394"; | exon_number | "1"; | gene_type | " |
| Dt_chr2 | Cufflinks | exon | 14479928 | 14480540 | . | . | gene_id | "XLOC_170970"; | transcript_id | "Novel_002394"; | exon_number | "2"; | gene_type | " |
| Dt_chr2 | Cufflinks | exon | 15097385 | 15097642 | . | . | gene_id | "XLOC_171002"; | transcript_id | "Novel_002395"; | exon_number | "1"; | gene_type | " |
| Dt_chr2 | Cufflinks | exon | 15098744 | 15102217 | . | . | gene_id | "XLOC_171002"; | transcript_id | "Novel_002396"; | exon_number | "1"; | gene_type | " |
| Dt_chr2 | Cufflinks | exon | 15103635 | 15103682 | . | . | gene_id | "XLOC_171002"; | transcript_id | "Novel_002396"; | exon_number | "2"; | gene_type | " |
| Dt_chr2 | Cufflinks | exon | 15104954 | 15105138 | . | . | gene_id | "XLOC_171002"; | transcript_id | "Novel_002396"; | exon_number | "3"; | gene_type | " |
| Dt_chr2 | Cufflinks | exon | 15944022 | 15944238 | . | . | gene_id | "XLOC_171061"; | transcript_id | "Novel_002397"; | exon_number | "1"; | gene_type | " |
| Dt_chr2 | Cufflinks | exon | 17782001 | 17782702 | . | . | gene_id | "XLOC_171197"; | transcript_id | "Novel_002398"; | exon_number | "1"; | gene_type | " |
| Dt_chr2 | Cufflinks | exon | 17783392 | 17783553 | . | . | gene_id | "XLOC_171197"; | transcript_id | "Novel_002398"; | exon_number | "2"; | gene_type | " |
| Dt_chr2 | Cufflinks | exon | 17783643 | 17783789 | . | . | gene_id | "XLOC_171197"; | transcript_id | "Novel_002398"; | exon_number | "3"; | gene_type | " |
| Dt_chr2 | Cufflinks | exon | 17783949 | 17784136 | . | . | gene_id | "XLOC_171197"; | transcript_id | "Novel_002398"; | exon_number | "4"; | gene_type | " |
| Dt_chr2 | Cufflinks | exon | 17782001 | 17782476 | . | . | gene_id | "XLOC_171197"; | transcript_id | "Novel_002399"; | exon_number | "1"; | gene_type | " |
| Dt_chr2 | Cufflinks | exon | 17782593 | 17782702 | . | . | gene_id | "XLOC_171197"; | transcript_id | "Novel_002399"; | exon_number | "2"; | gene_type | " |
| Dt_chr2 | Cufflinks | exon | 17783392 | 17783553 | . | . | gene_id | "XLOC_171197"; | transcript_id | "Novel_002399"; | exon_number | "3"; | gene_type | " |
| Dt_chr2 | Cufflinks | exon | 17783643 | 17783789 | . | . | gene_id | "XLOC_171197"; | transcript_id | "Novel_002399"; | exon_number | "4"; | gene_type | " |

|         |           |      |          |          |   |   |   |         |                |               |                 |             |      |           |   |
|---------|-----------|------|----------|----------|---|---|---|---------|----------------|---------------|-----------------|-------------|------|-----------|---|
| Dt_chr2 | Cufflinks | exon | 17783949 | 17784136 | . | - | . | gene_id | "XLOC_171197"; | transcript_id | "Novel_002399"; | exon_number | "5"; | gene_type | " |
| Dt_chr2 | Cufflinks | exon | 17783159 | 17783553 | . | - | . | gene_id | "XLOC_171197"; | transcript_id | "Novel_002400"; | exon_number | "1"; | gene_type | " |
| Dt_chr2 | Cufflinks | exon | 17783643 | 17783789 | . | - | . | gene_id | "XLOC_171197"; | transcript_id | "Novel_002400"; | exon_number | "2"; | gene_type | " |
| Dt_chr2 | Cufflinks | exon | 17783949 | 17784039 | . | - | . | gene_id | "XLOC_171197"; | transcript_id | "Novel_002400"; | exon_number | "3"; | gene_type | " |
| Dt_chr2 | Cufflinks | exon | 17920280 | 17920672 | . | - | . | gene_id | "XLOC_171221"; | transcript_id | "Novel_002401"; | exon_number | "1"; | gene_type | " |
| Dt_chr2 | Cufflinks | exon | 17920756 | 17921418 | . | - | . | gene_id | "XLOC_171221"; | transcript_id | "Novel_002401"; | exon_number | "2"; | gene_type | " |
| Dt_chr2 | Cufflinks | exon | 19136997 | 19137712 | . | - | . | gene_id | "XLOC_171265"; | transcript_id | "Novel_002402"; | exon_number | "1"; | gene_type | " |
| Dt_chr2 | Cufflinks | exon | 19138102 | 19138321 | . | - | . | gene_id | "XLOC_171265"; | transcript_id | "Novel_002402"; | exon_number | "2"; | gene_type | " |
| Dt_chr2 | Cufflinks | exon | 19137078 | 19138307 | . | - | . | gene_id | "XLOC_171265"; | transcript_id | "Novel_002403"; | exon_number | "1"; | gene_type | " |
| Dt_chr2 | Cufflinks | exon | 19138495 | 19138642 | . | - | . | gene_id | "XLOC_171265"; | transcript_id | "Novel_002403"; | exon_number | "2"; | gene_type | " |
| Dt_chr2 | Cufflinks | exon | 19138783 | 19139747 | . | - | . | gene_id | "XLOC_171265"; | transcript_id | "Novel_002403"; | exon_number | "3"; | gene_type | " |
| Dt_chr2 | Cufflinks | exon | 19137150 | 19137712 | . | - | . | gene_id | "XLOC_171265"; | transcript_id | "Novel_002404"; | exon_number | "1"; | gene_type | " |
| Dt_chr2 | Cufflinks | exon | 19138102 | 19138307 | . | - | . | gene_id | "XLOC_171265"; | transcript_id | "Novel_002404"; | exon_number | "2"; | gene_type | " |
| Dt_chr2 | Cufflinks | exon | 19138495 | 19138642 | . | - | . | gene_id | "XLOC_171265"; | transcript_id | "Novel_002404"; | exon_number | "3"; | gene_type | " |
| Dt_chr2 | Cufflinks | exon | 19138783 | 19139691 | . | - | . | gene_id | "XLOC_171265"; | transcript_id | "Novel_002404"; | exon_number | "4"; | gene_type | " |
| Dt_chr2 | Cufflinks | exon | 19137721 | 19138642 | . | - | . | gene_id | "XLOC_171265"; | transcript_id | "Novel_002405"; | exon_number | "1"; | gene_type | " |
| Dt_chr2 | Cufflinks | exon | 19138783 | 19139376 | . | - | . | gene_id | "XLOC_171265"; | transcript_id | "Novel_002405"; | exon_number | "2"; | gene_type | " |
| Dt_chr2 | Cufflinks | exon | 19162598 | 19162668 | . | - | . | gene_id | "XLOC_171269"; | transcript_id | "Novel_002406"; | exon_number | "1"; | gene_type | " |
| Dt_chr2 | Cufflinks | exon | 19162942 | 19163131 | . | - | . | gene_id | "XLOC_171269"; | transcript_id | "Novel_002406"; | exon_number | "2"; | gene_type | " |
| Dt_chr2 | Cufflinks | exon | 19506953 | 19507956 | . | - | . | gene_id | "XLOC_171292"; | transcript_id | "Novel_002407"; | exon_number | "1"; | gene_type | " |
| Dt_chr2 | Cufflinks | exon | 19508182 | 19509787 | . | - | . | gene_id | "XLOC_171292"; | transcript_id | "Novel_002407"; | exon_number | "2"; | gene_type | " |
| Dt_chr2 | Cufflinks | exon | 19509865 | 19510555 | . | - | . | gene_id | "XLOC_171292"; | transcript_id | "Novel_002407"; | exon_number | "3"; | gene_type | " |
| Dt_chr2 | Cufflinks | exon | 19506956 | 19507956 | . | - | . | gene_id | "XLOC_171292"; | transcript_id | "Novel_002408"; | exon_number | "1"; | gene_type | " |
| Dt_chr2 | Cufflinks | exon | 19508182 | 19509297 | . | - | . | gene_id | "XLOC_171292"; | transcript_id | "Novel_002408"; | exon_number | "2"; | gene_type | " |
| Dt_chr2 | Cufflinks | exon | 19509468 | 19509787 | . | - | . | gene_id | "XLOC_171292"; | transcript_id | "Novel_002408"; | exon_number | "3"; | gene_type | " |
| Dt_chr2 | Cufflinks | exon | 19509865 | 19510527 | . | - | . | gene_id | "XLOC_171292"; | transcript_id | "Novel_002408"; | exon_number | "4"; | gene_type | " |
| Dt_chr2 | Cufflinks | exon | 19741842 | 19742056 | . | - | . | gene_id | "XLOC_171310"; | transcript_id | "Novel_002409"; | exon_number | "1"; | gene_type | " |
| Dt_chr2 | Cufflinks | exon | 19742207 | 19742299 | . | - | . | gene_id | "XLOC_171310"; | transcript_id | "Novel_002409"; | exon_number | "2"; | gene_type | " |
| Dt_chr2 | Cufflinks | exon | 19742433 | 19743162 | . | - | . | gene_id | "XLOC_171310"; | transcript_id | "Novel_002409"; | exon_number | "3"; | gene_type | " |
| Dt_chr2 | Cufflinks | exon | 23330431 | 23331759 | . | - | . | gene_id | "XLOC_171564"; | transcript_id | "Novel_002410"; | exon_number | "1"; | gene_type | " |
| Dt_chr2 | Cufflinks | exon | 23342351 | 23342440 | . | - | . | gene_id | "XLOC_171564"; | transcript_id | "Novel_002410"; | exon_number | "2"; | gene_type | " |
| Dt_chr2 | Cufflinks | exon | 29409381 | 29409587 | . | - | . | gene_id | "XLOC_171824"; | transcript_id | "Novel_002411"; | exon_number | "1"; | gene_type | " |
| Dt_chr2 | Cufflinks | exon | 38779458 | 38779794 | . | - | . | gene_id | "XLOC_172357"; | transcript_id | "Novel_002412"; | exon_number | "1"; | gene_type | " |
| Dt_chr2 | Cufflinks | exon | 38779928 | 38780324 | . | - | . | gene_id | "XLOC_172357"; | transcript_id | "Novel_002412"; | exon_number | "2"; | gene_type | " |
| Dt_chr2 | Cufflinks | exon | 38801970 | 38803088 | . | - | . | gene_id | "XLOC_172359"; | transcript_id | "Novel_002413"; | exon_number | "1"; | gene_type | " |



|         |           |      |          |          |   |   |   |         |                |               |                 |             |      |           |   |
|---------|-----------|------|----------|----------|---|---|---|---------|----------------|---------------|-----------------|-------------|------|-----------|---|
| Dt_chr2 | Cufflinks | exon | 38805184 | 38805806 | . | - | . | gene_id | "XLOC_172359"; | transcript_id | "Novel_002413"; | exon_number | "2"; | gene_type | " |
| Dt_chr2 | Cufflinks | exon | 41444611 | 41446522 | . | - | . | gene_id | "XLOC_172580"; | transcript_id | "Novel_002414"; | exon_number | "1"; | gene_type | " |
| Dt_chr2 | Cufflinks | exon | 41449796 | 41449932 | . | - | . | gene_id | "XLOC_172580"; | transcript_id | "Novel_002414"; | exon_number | "2"; | gene_type | " |
| Dt_chr2 | Cufflinks | exon | 44191180 | 44191722 | . | - | . | gene_id | "XLOC_172876"; | transcript_id | "Novel_002415"; | exon_number | "1"; | gene_type | " |
| Dt_chr2 | Cufflinks | exon | 44192213 | 44192469 | . | - | . | gene_id | "XLOC_172876"; | transcript_id | "Novel_002415"; | exon_number | "2"; | gene_type | " |
| Dt_chr2 | Cufflinks | exon | 44246856 | 44247050 | . | - | . | gene_id | "XLOC_172887"; | transcript_id | "Novel_002416"; | exon_number | "1"; | gene_type | " |
| Dt_chr2 | Cufflinks | exon | 44247348 | 44247534 | . | - | . | gene_id | "XLOC_172887"; | transcript_id | "Novel_002416"; | exon_number | "2"; | gene_type | " |
| Dt_chr2 | Cufflinks | exon | 44247618 | 44247756 | . | - | . | gene_id | "XLOC_172887"; | transcript_id | "Novel_002416"; | exon_number | "3"; | gene_type | " |
| Dt_chr2 | Cufflinks | exon | 44248658 | 44248730 | . | - | . | gene_id | "XLOC_172887"; | transcript_id | "Novel_002416"; | exon_number | "4"; | gene_type | " |
| Dt_chr2 | Cufflinks | exon | 44248845 | 44249011 | . | - | . | gene_id | "XLOC_172887"; | transcript_id | "Novel_002416"; | exon_number | "5"; | gene_type | " |
| Dt_chr2 | Cufflinks | exon | 44859627 | 44859833 | . | - | . | gene_id | "XLOC_172983"; | transcript_id | "Novel_002417"; | exon_number | "1"; | gene_type | " |
| Dt_chr2 | Cufflinks | exon | 44861303 | 44861650 | . | - | . | gene_id | "XLOC_172983"; | transcript_id | "Novel_002417"; | exon_number | "2"; | gene_type | " |
| Dt_chr2 | Cufflinks | exon | 48952206 | 48955293 | . | - | . | gene_id | "XLOC_173360"; | transcript_id | "Novel_002418"; | exon_number | "1"; | gene_type | " |
| Dt_chr2 | Cufflinks | exon | 48958423 | 48958648 | . | - | . | gene_id | "XLOC_173360"; | transcript_id | "Novel_002418"; | exon_number | "2"; | gene_type | " |
| Dt_chr3 | Cufflinks | exon | 1202431  | 1202596  | . | + | . | gene_id | "XLOC_173609"; | transcript_id | "Novel_002419"; | exon_number | "1"; | gene_type | " |
| Dt_chr3 | Cufflinks | exon | 1202902  | 1203048  | . | + | . | gene_id | "XLOC_173609"; | transcript_id | "Novel_002419"; | exon_number | "2"; | gene_type | " |
| Dt_chr3 | Cufflinks | exon | 1203929  | 1204127  | . | + | . | gene_id | "XLOC_173609"; | transcript_id | "Novel_002419"; | exon_number | "3"; | gene_type | " |
| Dt_chr3 | Cufflinks | exon | 1887047  | 1888137  | . | + | . | gene_id | "XLOC_173641"; | transcript_id | "Novel_002420"; | exon_number | "1"; | gene_type | " |
| Dt_chr3 | Cufflinks | exon | 1888923  | 1889228  | . | + | . | gene_id | "XLOC_173641"; | transcript_id | "Novel_002420"; | exon_number | "2"; | gene_type | " |
| Dt_chr3 | Cufflinks | exon | 1887053  | 1888137  | . | + | . | gene_id | "XLOC_173641"; | transcript_id | "Novel_002421"; | exon_number | "1"; | gene_type | " |
| Dt_chr3 | Cufflinks | exon | 1888923  | 1889149  | . | + | . | gene_id | "XLOC_173641"; | transcript_id | "Novel_002421"; | exon_number | "2"; | gene_type | " |
| Dt_chr3 | Cufflinks | exon | 1889242  | 1889390  | . | + | . | gene_id | "XLOC_173641"; | transcript_id | "Novel_002421"; | exon_number | "3"; | gene_type | " |
| Dt_chr3 | Cufflinks | exon | 1889527  | 1890507  | . | + | . | gene_id | "XLOC_173641"; | transcript_id | "Novel_002421"; | exon_number | "4"; | gene_type | " |
| Dt_chr3 | Cufflinks | exon | 1887068  | 1888137  | . | + | . | gene_id | "XLOC_173641"; | transcript_id | "Novel_002422"; | exon_number | "1"; | gene_type | " |
| Dt_chr3 | Cufflinks | exon | 1888923  | 1889149  | . | + | . | gene_id | "XLOC_173641"; | transcript_id | "Novel_002422"; | exon_number | "2"; | gene_type | " |
| Dt_chr3 | Cufflinks | exon | 1889242  | 1889584  | . | + | . | gene_id | "XLOC_173641"; | transcript_id | "Novel_002422"; | exon_number | "3"; | gene_type | " |
| Dt_chr3 | Cufflinks | exon | 1889670  | 1889863  | . | + | . | gene_id | "XLOC_173641"; | transcript_id | "Novel_002423"; | exon_number | "1"; | gene_type | " |
| Dt_chr3 | Cufflinks | exon | 1891739  | 1891804  | . | + | . | gene_id | "XLOC_173641"; | transcript_id | "Novel_002423"; | exon_number | "2"; | gene_type | " |
| Dt_chr3 | Cufflinks | exon | 1891962  | 1892051  | . | + | . | gene_id | "XLOC_173641"; | transcript_id | "Novel_002423"; | exon_number | "3"; | gene_type | " |
| Dt_chr3 | Cufflinks | exon | 1892192  | 1892420  | . | + | . | gene_id | "XLOC_173641"; | transcript_id | "Novel_002423"; | exon_number | "4"; | gene_type | " |
| Dt_chr3 | Cufflinks | exon | 1892758  | 1893422  | . | + | . | gene_id | "XLOC_173641"; | transcript_id | "Novel_002423"; | exon_number | "5"; | gene_type | " |
| Dt_chr3 | Cufflinks | exon | 1890781  | 1891804  | . | + | . | gene_id | "XLOC_173641"; | transcript_id | "Novel_002424"; | exon_number | "1"; | gene_type | " |
| Dt_chr3 | Cufflinks | exon | 1891962  | 1892051  | . | + | . | gene_id | "XLOC_173641"; | transcript_id | "Novel_002424"; | exon_number | "2"; | gene_type | " |
| Dt_chr3 | Cufflinks | exon | 1892192  | 1892420  | . | + | . | gene_id | "XLOC_173641"; | transcript_id | "Novel_002424"; | exon_number | "3"; | gene_type | " |
| Dt_chr3 | Cufflinks | exon | 1892758  | 1893422  | . | + | . | gene_id | "XLOC_173641"; | transcript_id | "Novel_002424"; | exon_number | "4"; | gene_type | " |

|         |           |      |          |          |   |   |   |         |                |               |                 |             |       |           |   |
|---------|-----------|------|----------|----------|---|---|---|---------|----------------|---------------|-----------------|-------------|-------|-----------|---|
| Dt_chr3 | Cufflinks | exon | 12497686 | 12497809 | . | + | . | gene_id | "XLOC_174249"; | transcript_id | "Novel_002425"; | exon_number | "1";  | gene_type | " |
| Dt_chr3 | Cufflinks | exon | 12498687 | 12498957 | . | + | . | gene_id | "XLOC_174249"; | transcript_id | "Novel_002425"; | exon_number | "2";  | gene_type | " |
| Dt_chr3 | Cufflinks | exon | 12499392 | 12499556 | . | + | . | gene_id | "XLOC_174249"; | transcript_id | "Novel_002425"; | exon_number | "3";  | gene_type | " |
| Dt_chr3 | Cufflinks | exon | 12499674 | 12500272 | . | + | . | gene_id | "XLOC_174249"; | transcript_id | "Novel_002425"; | exon_number | "4";  | gene_type | " |
| Dt_chr3 | Cufflinks | exon | 12499333 | 12499556 | . | + | . | gene_id | "XLOC_174249"; | transcript_id | "Novel_002426"; | exon_number | "1";  | gene_type | " |
| Dt_chr3 | Cufflinks | exon | 12499674 | 12500013 | . | + | . | gene_id | "XLOC_174249"; | transcript_id | "Novel_002426"; | exon_number | "2";  | gene_type | " |
| Dt_chr3 | Cufflinks | exon | 15632027 | 15632555 | . | + | . | gene_id | "XLOC_174565"; | transcript_id | "Novel_002427"; | exon_number | "1";  | gene_type | " |
| Dt_chr3 | Cufflinks | exon | 15633200 | 15633322 | . | + | . | gene_id | "XLOC_174565"; | transcript_id | "Novel_002427"; | exon_number | "2";  | gene_type | " |
| Dt_chr3 | Cufflinks | exon | 15633427 | 15633477 | . | + | . | gene_id | "XLOC_174565"; | transcript_id | "Novel_002427"; | exon_number | "3";  | gene_type | " |
| Dt_chr3 | Cufflinks | exon | 15633647 | 15633718 | . | + | . | gene_id | "XLOC_174565"; | transcript_id | "Novel_002427"; | exon_number | "4";  | gene_type | " |
| Dt_chr3 | Cufflinks | exon | 15633873 | 15633983 | . | + | . | gene_id | "XLOC_174565"; | transcript_id | "Novel_002427"; | exon_number | "5";  | gene_type | " |
| Dt_chr3 | Cufflinks | exon | 15634072 | 15634133 | . | + | . | gene_id | "XLOC_174565"; | transcript_id | "Novel_002427"; | exon_number | "6";  | gene_type | " |
| Dt_chr3 | Cufflinks | exon | 15634696 | 15634756 | . | + | . | gene_id | "XLOC_174565"; | transcript_id | "Novel_002427"; | exon_number | "7";  | gene_type | " |
| Dt_chr3 | Cufflinks | exon | 15634843 | 15634899 | . | + | . | gene_id | "XLOC_174565"; | transcript_id | "Novel_002427"; | exon_number | "8";  | gene_type | " |
| Dt_chr3 | Cufflinks | exon | 15635007 | 15635051 | . | + | . | gene_id | "XLOC_174565"; | transcript_id | "Novel_002427"; | exon_number | "9";  | gene_type | " |
| Dt_chr3 | Cufflinks | exon | 15636223 | 15636594 | . | + | . | gene_id | "XLOC_174565"; | transcript_id | "Novel_002427"; | exon_number | "10"; | gene_type | " |
| Dt_chr3 | Cufflinks | exon | 15721586 | 15721804 | . | + | . | gene_id | "XLOC_174570"; | transcript_id | "Novel_002428"; | exon_number | "1";  | gene_type | " |
| Dt_chr3 | Cufflinks | exon | 15721937 | 15721963 | . | + | . | gene_id | "XLOC_174570"; | transcript_id | "Novel_002428"; | exon_number | "2";  | gene_type | " |
| Dt_chr3 | Cufflinks | exon | 15722076 | 15722876 | . | + | . | gene_id | "XLOC_174570"; | transcript_id | "Novel_002428"; | exon_number | "3";  | gene_type | " |
| Dt_chr3 | Cufflinks | exon | 15721599 | 15721804 | . | + | . | gene_id | "XLOC_174570"; | transcript_id | "Novel_002429"; | exon_number | "1";  | gene_type | " |
| Dt_chr3 | Cufflinks | exon | 15721937 | 15722512 | . | + | . | gene_id | "XLOC_174570"; | transcript_id | "Novel_002429"; | exon_number | "2";  | gene_type | " |
| Dt_chr3 | Cufflinks | exon | 15722581 | 15723408 | . | + | . | gene_id | "XLOC_174570"; | transcript_id | "Novel_002429"; | exon_number | "3";  | gene_type | " |
| Dt_chr3 | Cufflinks | exon | 16185569 | 16189110 | . | + | . | gene_id | "XLOC_174589"; | transcript_id | "Novel_002430"; | exon_number | "1";  | gene_type | " |
| Dt_chr3 | Cufflinks | exon | 16189208 | 16189597 | . | + | . | gene_id | "XLOC_174589"; | transcript_id | "Novel_002430"; | exon_number | "2";  | gene_type | " |
| Dt_chr3 | Cufflinks | exon | 20372968 | 20373654 | . | + | . | gene_id | "XLOC_174907"; | transcript_id | "Novel_002431"; | exon_number | "1";  | gene_type | " |
| Dt_chr3 | Cufflinks | exon | 20438900 | 20439564 | . | + | . | gene_id | "XLOC_174913"; | transcript_id | "Novel_002432"; | exon_number | "1";  | gene_type | " |
| Dt_chr3 | Cufflinks | exon | 20439649 | 20439767 | . | + | . | gene_id | "XLOC_174913"; | transcript_id | "Novel_002432"; | exon_number | "2";  | gene_type | " |
| Dt_chr3 | Cufflinks | exon | 20440065 | 20440391 | . | + | . | gene_id | "XLOC_174913"; | transcript_id | "Novel_002432"; | exon_number | "3";  | gene_type | " |
| Dt_chr3 | Cufflinks | exon | 20439056 | 20439362 | . | + | . | gene_id | "XLOC_174913"; | transcript_id | "Novel_002433"; | exon_number | "1";  | gene_type | " |
| Dt_chr3 | Cufflinks | exon | 20439455 | 20439564 | . | + | . | gene_id | "XLOC_174913"; | transcript_id | "Novel_002433"; | exon_number | "2";  | gene_type | " |
| Dt_chr3 | Cufflinks | exon | 20439649 | 20441369 | . | + | . | gene_id | "XLOC_174913"; | transcript_id | "Novel_002433"; | exon_number | "3";  | gene_type | " |
| Dt_chr3 | Cufflinks | exon | 20439057 | 20439564 | . | + | . | gene_id | "XLOC_174913"; | transcript_id | "Novel_002434"; | exon_number | "1";  | gene_type | " |
| Dt_chr3 | Cufflinks | exon | 20439649 | 20441046 | . | + | . | gene_id | "XLOC_174913"; | transcript_id | "Novel_002434"; | exon_number | "2";  | gene_type | " |
| Dt_chr3 | Cufflinks | exon | 20442702 | 20442948 | . | + | . | gene_id | "XLOC_174914"; | transcript_id | "Novel_002435"; | exon_number | "1";  | gene_type | " |
| Dt_chr3 | Cufflinks | exon | 20443051 | 20443279 | . | + | . | gene_id | "XLOC_174914"; | transcript_id | "Novel_002435"; | exon_number | "2";  | gene_type | " |

|         |           |      |          |          |   |   |   |         |                |               |                 |             |      |           |   |
|---------|-----------|------|----------|----------|---|---|---|---------|----------------|---------------|-----------------|-------------|------|-----------|---|
| Dt_chr3 | Cufflinks | exon | 20443611 | 20443920 | . | + | . | gene_id | "XLOC_174914"; | transcript_id | "Novel_002435"; | exon_number | "3"; | gene_type | " |
| Dt_chr3 | Cufflinks | exon | 20442720 | 20442948 | . | + | . | gene_id | "XLOC_174914"; | transcript_id | "Novel_002436"; | exon_number | "1"; | gene_type | " |
| Dt_chr3 | Cufflinks | exon | 20443051 | 20443160 | . | + | . | gene_id | "XLOC_174914"; | transcript_id | "Novel_002436"; | exon_number | "2"; | gene_type | " |
| Dt_chr3 | Cufflinks | exon | 20443225 | 20443279 | . | + | . | gene_id | "XLOC_174914"; | transcript_id | "Novel_002436"; | exon_number | "3"; | gene_type | " |
| Dt_chr3 | Cufflinks | exon | 20443611 | 20444301 | . | + | . | gene_id | "XLOC_174914"; | transcript_id | "Novel_002436"; | exon_number | "4"; | gene_type | " |
| Dt_chr3 | Cufflinks | exon | 22433552 | 22435217 | . | + | . | gene_id | "XLOC_175158"; | transcript_id | "Novel_002437"; | exon_number | "1"; | gene_type | " |
| Dt_chr3 | Cufflinks | exon | 22435341 | 22435596 | . | + | . | gene_id | "XLOC_175158"; | transcript_id | "Novel_002437"; | exon_number | "2"; | gene_type | " |
| Dt_chr3 | Cufflinks | exon | 22436583 | 22436790 | . | + | . | gene_id | "XLOC_175160"; | transcript_id | "Novel_002438"; | exon_number | "1"; | gene_type | " |
| Dt_chr3 | Cufflinks | exon | 22437828 | 22437900 | . | + | . | gene_id | "XLOC_175160"; | transcript_id | "Novel_002438"; | exon_number | "2"; | gene_type | " |
| Dt_chr3 | Cufflinks | exon | 22438098 | 22438303 | . | + | . | gene_id | "XLOC_175160"; | transcript_id | "Novel_002438"; | exon_number | "3"; | gene_type | " |
| Dt_chr3 | Cufflinks | exon | 22438383 | 22439578 | . | + | . | gene_id | "XLOC_175160"; | transcript_id | "Novel_002438"; | exon_number | "4"; | gene_type | " |
| Dt_chr3 | Cufflinks | exon | 22443815 | 22445358 | . | + | . | gene_id | "XLOC_175160"; | transcript_id | "Novel_002439"; | exon_number | "1"; | gene_type | " |
| Dt_chr3 | Cufflinks | exon | 22446357 | 22446436 | . | + | . | gene_id | "XLOC_175160"; | transcript_id | "Novel_002439"; | exon_number | "2"; | gene_type | " |
| Dt_chr3 | Cufflinks | exon | 22446526 | 22446580 | . | + | . | gene_id | "XLOC_175160"; | transcript_id | "Novel_002439"; | exon_number | "3"; | gene_type | " |
| Dt_chr3 | Cufflinks | exon | 22446822 | 22446919 | . | + | . | gene_id | "XLOC_175160"; | transcript_id | "Novel_002439"; | exon_number | "4"; | gene_type | " |
| Dt_chr3 | Cufflinks | exon | 22447432 | 22447500 | . | + | . | gene_id | "XLOC_175160"; | transcript_id | "Novel_002439"; | exon_number | "5"; | gene_type | " |
| Dt_chr3 | Cufflinks | exon | 22447654 | 22448045 | . | + | . | gene_id | "XLOC_175160"; | transcript_id | "Novel_002439"; | exon_number | "6"; | gene_type | " |
| Dt_chr3 | Cufflinks | exon | 22457640 | 22457927 | . | + | . | gene_id | "XLOC_175160"; | transcript_id | "Novel_002440"; | exon_number | "1"; | gene_type | " |
| Dt_chr3 | Cufflinks | exon | 22458443 | 22458667 | . | + | . | gene_id | "XLOC_175160"; | transcript_id | "Novel_002440"; | exon_number | "2"; | gene_type | " |
| Dt_chr3 | Cufflinks | exon | 22459667 | 22459732 | . | + | . | gene_id | "XLOC_175160"; | transcript_id | "Novel_002440"; | exon_number | "3"; | gene_type | " |
| Dt_chr3 | Cufflinks | exon | 22460952 | 22461239 | . | + | . | gene_id | "XLOC_175160"; | transcript_id | "Novel_002440"; | exon_number | "4"; | gene_type | " |
| Dt_chr3 | Cufflinks | exon | 22461375 | 22461524 | . | + | . | gene_id | "XLOC_175160"; | transcript_id | "Novel_002440"; | exon_number | "5"; | gene_type | " |
| Dt_chr3 | Cufflinks | exon | 22457665 | 22457927 | . | + | . | gene_id | "XLOC_175160"; | transcript_id | "Novel_002441"; | exon_number | "1"; | gene_type | " |
| Dt_chr3 | Cufflinks | exon | 22458443 | 22458708 | . | + | . | gene_id | "XLOC_175160"; | transcript_id | "Novel_002441"; | exon_number | "2"; | gene_type | " |
| Dt_chr3 | Cufflinks | exon | 22458046 | 22458667 | . | + | . | gene_id | "XLOC_175160"; | transcript_id | "Novel_002442"; | exon_number | "1"; | gene_type | " |
| Dt_chr3 | Cufflinks | exon | 22459667 | 22459732 | . | + | . | gene_id | "XLOC_175160"; | transcript_id | "Novel_002442"; | exon_number | "2"; | gene_type | " |
| Dt_chr3 | Cufflinks | exon | 22460952 | 22461239 | . | + | . | gene_id | "XLOC_175160"; | transcript_id | "Novel_002442"; | exon_number | "3"; | gene_type | " |
| Dt_chr3 | Cufflinks | exon | 22461375 | 22461447 | . | + | . | gene_id | "XLOC_175160"; | transcript_id | "Novel_002442"; | exon_number | "4"; | gene_type | " |
| Dt_chr3 | Cufflinks | exon | 22461582 | 22461776 | . | + | . | gene_id | "XLOC_175160"; | transcript_id | "Novel_002443"; | exon_number | "1"; | gene_type | " |
| Dt_chr3 | Cufflinks | exon | 22462123 | 22462569 | . | + | . | gene_id | "XLOC_175160"; | transcript_id | "Novel_002443"; | exon_number | "2"; | gene_type | " |
| Dt_chr3 | Cufflinks | exon | 22461614 | 22461776 | . | + | . | gene_id | "XLOC_175160"; | transcript_id | "Novel_002444"; | exon_number | "1"; | gene_type | " |
| Dt_chr3 | Cufflinks | exon | 22462123 | 22462301 | . | + | . | gene_id | "XLOC_175160"; | transcript_id | "Novel_002444"; | exon_number | "2"; | gene_type | " |
| Dt_chr3 | Cufflinks | exon | 22463513 | 22463562 | . | + | . | gene_id | "XLOC_175160"; | transcript_id | "Novel_002444"; | exon_number | "3"; | gene_type | " |
| Dt_chr3 | Cufflinks | exon | 22463994 | 22464818 | . | + | . | gene_id | "XLOC_175160"; | transcript_id | "Novel_002444"; | exon_number | "4"; | gene_type | " |
| Dt_chr3 | Cufflinks | exon | 22466899 | 22467544 | . | + | . | gene_id | "XLOC_175160"; | transcript_id | "Novel_002445"; | exon_number | "1"; | gene_type | " |

|         |           |      |          |          |   |   |   |         |                |               |                 |             |      |           |   |
|---------|-----------|------|----------|----------|---|---|---|---------|----------------|---------------|-----------------|-------------|------|-----------|---|
| Dt_chr3 | Cufflinks | exon | 22468070 | 22468333 | . | + | . | gene_id | "XLOC_175160"; | transcript_id | "Novel_002445"; | exon_number | "2"; | gene_type | " |
| Dt_chr3 | Cufflinks | exon | 22468497 | 22468690 | . | + | . | gene_id | "XLOC_175160"; | transcript_id | "Novel_002445"; | exon_number | "3"; | gene_type | " |
| Dt_chr3 | Cufflinks | exon | 22468813 | 22469002 | . | + | . | gene_id | "XLOC_175160"; | transcript_id | "Novel_002445"; | exon_number | "4"; | gene_type | " |
| Dt_chr3 | Cufflinks | exon | 22469444 | 22469603 | . | + | . | gene_id | "XLOC_175160"; | transcript_id | "Novel_002445"; | exon_number | "5"; | gene_type | " |
| Dt_chr3 | Cufflinks | exon | 22470323 | 22470439 | . | + | . | gene_id | "XLOC_175160"; | transcript_id | "Novel_002445"; | exon_number | "6"; | gene_type | " |
| Dt_chr3 | Cufflinks | exon | 22470622 | 22470753 | . | + | . | gene_id | "XLOC_175160"; | transcript_id | "Novel_002445"; | exon_number | "7"; | gene_type | " |
| Dt_chr3 | Cufflinks | exon | 22471096 | 22472807 | . | + | . | gene_id | "XLOC_175160"; | transcript_id | "Novel_002445"; | exon_number | "8"; | gene_type | " |
| Dt_chr3 | Cufflinks | exon | 22475594 | 22477760 | . | + | . | gene_id | "XLOC_175175"; | transcript_id | "Novel_002446"; | exon_number | "1"; | gene_type | " |
| Dt_chr3 | Cufflinks | exon | 22478573 | 22478738 | . | + | . | gene_id | "XLOC_175175"; | transcript_id | "Novel_002446"; | exon_number | "2"; | gene_type | " |
| Dt_chr3 | Cufflinks | exon | 22505323 | 22505337 | . | + | . | gene_id | "XLOC_175186"; | transcript_id | "Novel_002447"; | exon_number | "1"; | gene_type | " |
| Dt_chr3 | Cufflinks | exon | 22505425 | 22505712 | . | + | . | gene_id | "XLOC_175186"; | transcript_id | "Novel_002447"; | exon_number | "2"; | gene_type | " |
| Dt_chr3 | Cufflinks | exon | 22886290 | 22886861 | . | + | . | gene_id | "XLOC_175233"; | transcript_id | "Novel_002448"; | exon_number | "1"; | gene_type | " |
| Dt_chr3 | Cufflinks | exon | 22886967 | 22887515 | . | + | . | gene_id | "XLOC_175233"; | transcript_id | "Novel_002448"; | exon_number | "2"; | gene_type | " |
| Dt_chr3 | Cufflinks | exon | 23576106 | 23576485 | . | + | . | gene_id | "XLOC_175288"; | transcript_id | "Novel_002449"; | exon_number | "1"; | gene_type | " |
| Dt_chr3 | Cufflinks | exon | 23577225 | 23577585 | . | + | . | gene_id | "XLOC_175288"; | transcript_id | "Novel_002449"; | exon_number | "2"; | gene_type | " |
| Dt_chr3 | Cufflinks | exon | 24435099 | 24435329 | . | + | . | gene_id | "XLOC_175350"; | transcript_id | "Novel_002450"; | exon_number | "1"; | gene_type | " |
| Dt_chr3 | Cufflinks | exon | 24435725 | 24435798 | . | + | . | gene_id | "XLOC_175350"; | transcript_id | "Novel_002450"; | exon_number | "2"; | gene_type | " |
| Dt_chr3 | Cufflinks | exon | 24435901 | 24435977 | . | + | . | gene_id | "XLOC_175350"; | transcript_id | "Novel_002450"; | exon_number | "3"; | gene_type | " |
| Dt_chr3 | Cufflinks | exon | 24436073 | 24436132 | . | + | . | gene_id | "XLOC_175350"; | transcript_id | "Novel_002450"; | exon_number | "4"; | gene_type | " |
| Dt_chr3 | Cufflinks | exon | 24442310 | 24442340 | . | + | . | gene_id | "XLOC_175350"; | transcript_id | "Novel_002450"; | exon_number | "5"; | gene_type | " |
| Dt_chr3 | Cufflinks | exon | 24442432 | 24442600 | . | + | . | gene_id | "XLOC_175350"; | transcript_id | "Novel_002450"; | exon_number | "6"; | gene_type | " |
| Dt_chr3 | Cufflinks | exon | 24435245 | 24435329 | . | + | . | gene_id | "XLOC_175350"; | transcript_id | "Novel_002451"; | exon_number | "1"; | gene_type | " |
| Dt_chr3 | Cufflinks | exon | 24435725 | 24435798 | . | + | . | gene_id | "XLOC_175350"; | transcript_id | "Novel_002451"; | exon_number | "2"; | gene_type | " |
| Dt_chr3 | Cufflinks | exon | 24435901 | 24435977 | . | + | . | gene_id | "XLOC_175350"; | transcript_id | "Novel_002451"; | exon_number | "3"; | gene_type | " |
| Dt_chr3 | Cufflinks | exon | 24442250 | 24442340 | . | + | . | gene_id | "XLOC_175350"; | transcript_id | "Novel_002451"; | exon_number | "4"; | gene_type | " |
| Dt_chr3 | Cufflinks | exon | 24442432 | 24442742 | . | + | . | gene_id | "XLOC_175350"; | transcript_id | "Novel_002451"; | exon_number | "5"; | gene_type | " |
| Dt_chr3 | Cufflinks | exon | 24435308 | 24435329 | . | + | . | gene_id | "XLOC_175350"; | transcript_id | "Novel_002452"; | exon_number | "1"; | gene_type | " |
| Dt_chr3 | Cufflinks | exon | 24441905 | 24441978 | . | + | . | gene_id | "XLOC_175350"; | transcript_id | "Novel_002452"; | exon_number | "2"; | gene_type | " |
| Dt_chr3 | Cufflinks | exon | 24442077 | 24442153 | . | + | . | gene_id | "XLOC_175350"; | transcript_id | "Novel_002452"; | exon_number | "3"; | gene_type | " |
| Dt_chr3 | Cufflinks | exon | 24442250 | 24442340 | . | + | . | gene_id | "XLOC_175350"; | transcript_id | "Novel_002452"; | exon_number | "4"; | gene_type | " |
| Dt_chr3 | Cufflinks | exon | 24442432 | 24442742 | . | + | . | gene_id | "XLOC_175350"; | transcript_id | "Novel_002452"; | exon_number | "5"; | gene_type | " |
| Dt_chr3 | Cufflinks | exon | 24441480 | 24441515 | . | + | . | gene_id | "XLOC_175350"; | transcript_id | "Novel_002453"; | exon_number | "1"; | gene_type | " |
| Dt_chr3 | Cufflinks | exon | 24441905 | 24441978 | . | + | . | gene_id | "XLOC_175350"; | transcript_id | "Novel_002453"; | exon_number | "2"; | gene_type | " |
| Dt_chr3 | Cufflinks | exon | 24442077 | 24442153 | . | + | . | gene_id | "XLOC_175350"; | transcript_id | "Novel_002453"; | exon_number | "3"; | gene_type | " |
| Dt_chr3 | Cufflinks | exon | 24442250 | 24442340 | . | + | . | gene_id | "XLOC_175350"; | transcript_id | "Novel_002453"; | exon_number | "4"; | gene_type | " |

|         |           |      |          |          |   |   |   |         |                |               |                 |             |      |           |   |
|---------|-----------|------|----------|----------|---|---|---|---------|----------------|---------------|-----------------|-------------|------|-----------|---|
| Dt_chr3 | Cufflinks | exon | 24442432 | 24442610 | . | + | . | gene_id | "XLOC_175350"; | transcript_id | "Novel_002453"; | exon_number | "5"; | gene_type | " |
| Dt_chr3 | Cufflinks | exon | 27204789 | 27204972 | . | + | . | gene_id | "XLOC_175689"; | transcript_id | "Novel_002454"; | exon_number | "1"; | gene_type | " |
| Dt_chr3 | Cufflinks | exon | 27205059 | 27207370 | . | + | . | gene_id | "XLOC_175689"; | transcript_id | "Novel_002454"; | exon_number | "2"; | gene_type | " |
| Dt_chr3 | Cufflinks | exon | 27204799 | 27204972 | . | + | . | gene_id | "XLOC_175689"; | transcript_id | "Novel_002455"; | exon_number | "1"; | gene_type | " |
| Dt_chr3 | Cufflinks | exon | 27205059 | 27205152 | . | + | . | gene_id | "XLOC_175689"; | transcript_id | "Novel_002455"; | exon_number | "2"; | gene_type | " |
| Dt_chr3 | Cufflinks | exon | 27206147 | 27207377 | . | + | . | gene_id | "XLOC_175689"; | transcript_id | "Novel_002455"; | exon_number | "3"; | gene_type | " |
| Dt_chr3 | Cufflinks | exon | 27204809 | 27204972 | . | + | . | gene_id | "XLOC_175689"; | transcript_id | "Novel_002456"; | exon_number | "1"; | gene_type | " |
| Dt_chr3 | Cufflinks | exon | 27205059 | 27205152 | . | + | . | gene_id | "XLOC_175689"; | transcript_id | "Novel_002456"; | exon_number | "2"; | gene_type | " |
| Dt_chr3 | Cufflinks | exon | 27206218 | 27207366 | . | + | . | gene_id | "XLOC_175689"; | transcript_id | "Novel_002456"; | exon_number | "3"; | gene_type | " |
| Dt_chr3 | Cufflinks | exon | 27408387 | 27408627 | . | + | . | gene_id | "XLOC_175709"; | transcript_id | "Novel_002457"; | exon_number | "1"; | gene_type | " |
| Dt_chr3 | Cufflinks | exon | 27408890 | 27411172 | . | + | . | gene_id | "XLOC_175709"; | transcript_id | "Novel_002457"; | exon_number | "2"; | gene_type | " |
| Dt_chr3 | Cufflinks | exon | 27811180 | 27811273 | . | + | . | gene_id | "XLOC_175748"; | transcript_id | "Novel_002458"; | exon_number | "1"; | gene_type | " |
| Dt_chr3 | Cufflinks | exon | 27811781 | 27811916 | . | + | . | gene_id | "XLOC_175748"; | transcript_id | "Novel_002458"; | exon_number | "2"; | gene_type | " |
| Dt_chr3 | Cufflinks | exon | 27812521 | 27812600 | . | + | . | gene_id | "XLOC_175748"; | transcript_id | "Novel_002458"; | exon_number | "3"; | gene_type | " |
| Dt_chr3 | Cufflinks | exon | 27816532 | 27816984 | . | + | . | gene_id | "XLOC_175748"; | transcript_id | "Novel_002458"; | exon_number | "4"; | gene_type | " |
| Dt_chr3 | Cufflinks | exon | 28405638 | 28406245 | . | + | . | gene_id | "XLOC_175795"; | transcript_id | "Novel_002459"; | exon_number | "1"; | gene_type | " |
| Dt_chr3 | Cufflinks | exon | 28407145 | 28407783 | . | + | . | gene_id | "XLOC_175795"; | transcript_id | "Novel_002459"; | exon_number | "2"; | gene_type | " |
| Dt_chr3 | Cufflinks | exon | 2232221  | 2234275  | . | - | . | gene_id | "XLOC_176605"; | transcript_id | "Novel_002460"; | exon_number | "1"; | gene_type | " |
| Dt_chr3 | Cufflinks | exon | 2242440  | 2242550  | . | - | . | gene_id | "XLOC_176605"; | transcript_id | "Novel_002460"; | exon_number | "2"; | gene_type | " |
| Dt_chr3 | Cufflinks | exon | 2242666  | 2243015  | . | - | . | gene_id | "XLOC_176605"; | transcript_id | "Novel_002460"; | exon_number | "3"; | gene_type | " |
| Dt_chr3 | Cufflinks | exon | 2243274  | 2243556  | . | - | . | gene_id | "XLOC_176605"; | transcript_id | "Novel_002460"; | exon_number | "4"; | gene_type | " |
| Dt_chr3 | Cufflinks | exon | 2243655  | 2243967  | . | - | . | gene_id | "XLOC_176605"; | transcript_id | "Novel_002460"; | exon_number | "5"; | gene_type | " |
| Dt_chr3 | Cufflinks | exon | 8644841  | 8647808  | . | - | . | gene_id | "XLOC_176888"; | transcript_id | "Novel_002461"; | exon_number | "1"; | gene_type | " |
| Dt_chr3 | Cufflinks | exon | 8786487  | 8787278  | . | - | . | gene_id | "XLOC_176893"; | transcript_id | "Novel_002462"; | exon_number | "1"; | gene_type | " |
| Dt_chr3 | Cufflinks | exon | 8787366  | 8787436  | . | - | . | gene_id | "XLOC_176893"; | transcript_id | "Novel_002462"; | exon_number | "2"; | gene_type | " |
| Dt_chr3 | Cufflinks | exon | 10473252 | 10474422 | . | - | . | gene_id | "XLOC_177054"; | transcript_id | "Novel_002463"; | exon_number | "1"; | gene_type | " |
| Dt_chr3 | Cufflinks | exon | 10475781 | 10476350 | . | - | . | gene_id | "XLOC_177054"; | transcript_id | "Novel_002463"; | exon_number | "2"; | gene_type | " |
| Dt_chr3 | Cufflinks | exon | 10473286 | 10473689 | . | - | . | gene_id | "XLOC_177054"; | transcript_id | "Novel_002464"; | exon_number | "1"; | gene_type | " |
| Dt_chr3 | Cufflinks | exon | 10474297 | 10474422 | . | - | . | gene_id | "XLOC_177054"; | transcript_id | "Novel_002464"; | exon_number | "2"; | gene_type | " |
| Dt_chr3 | Cufflinks | exon | 10475781 | 10476248 | . | - | . | gene_id | "XLOC_177054"; | transcript_id | "Novel_002464"; | exon_number | "3"; | gene_type | " |
| Dt_chr3 | Cufflinks | exon | 11040812 | 11041343 | . | - | . | gene_id | "XLOC_177119"; | transcript_id | "Novel_002465"; | exon_number | "1"; | gene_type | " |
| Dt_chr3 | Cufflinks | exon | 11041651 | 11041746 | . | - | . | gene_id | "XLOC_177119"; | transcript_id | "Novel_002465"; | exon_number | "2"; | gene_type | " |
| Dt_chr3 | Cufflinks | exon | 11042503 | 11042577 | . | - | . | gene_id | "XLOC_177119"; | transcript_id | "Novel_002465"; | exon_number | "3"; | gene_type | " |
| Dt_chr3 | Cufflinks | exon | 11043095 | 11043565 | . | - | . | gene_id | "XLOC_177119"; | transcript_id | "Novel_002465"; | exon_number | "4"; | gene_type | " |
| Dt_chr3 | Cufflinks | exon | 12540835 | 12541680 | . | - | . | gene_id | "XLOC_177243"; | transcript_id | "Novel_002466"; | exon_number | "1"; | gene_type | " |

|         |           |      |          |          |   |   |   |         |                |               |                 |             |       |           |   |
|---------|-----------|------|----------|----------|---|---|---|---------|----------------|---------------|-----------------|-------------|-------|-----------|---|
| Dt_chr3 | Cufflinks | exon | 12542995 | 12543533 | . | - | . | gene_id | "XLOC_177243"; | transcript_id | "Novel_002466"; | exon_number | "2";  | gene_type | " |
| Dt_chr3 | Cufflinks | exon | 15546787 | 15547372 | . | - | . | gene_id | "XLOC_177491"; | transcript_id | "Novel_002467"; | exon_number | "1";  | gene_type | " |
| Dt_chr3 | Cufflinks | exon | 15548528 | 15548572 | . | - | . | gene_id | "XLOC_177491"; | transcript_id | "Novel_002467"; | exon_number | "2";  | gene_type | " |
| Dt_chr3 | Cufflinks | exon | 15548680 | 15548736 | . | - | . | gene_id | "XLOC_177491"; | transcript_id | "Novel_002467"; | exon_number | "3";  | gene_type | " |
| Dt_chr3 | Cufflinks | exon | 15548823 | 15548883 | . | - | . | gene_id | "XLOC_177491"; | transcript_id | "Novel_002467"; | exon_number | "4";  | gene_type | " |
| Dt_chr3 | Cufflinks | exon | 15549452 | 15549513 | . | - | . | gene_id | "XLOC_177491"; | transcript_id | "Novel_002467"; | exon_number | "5";  | gene_type | " |
| Dt_chr3 | Cufflinks | exon | 15549605 | 15549715 | . | - | . | gene_id | "XLOC_177491"; | transcript_id | "Novel_002467"; | exon_number | "6";  | gene_type | " |
| Dt_chr3 | Cufflinks | exon | 15549865 | 15549936 | . | - | . | gene_id | "XLOC_177491"; | transcript_id | "Novel_002467"; | exon_number | "7";  | gene_type | " |
| Dt_chr3 | Cufflinks | exon | 15550107 | 15550157 | . | - | . | gene_id | "XLOC_177491"; | transcript_id | "Novel_002467"; | exon_number | "8";  | gene_type | " |
| Dt_chr3 | Cufflinks | exon | 15550262 | 15550384 | . | - | . | gene_id | "XLOC_177491"; | transcript_id | "Novel_002467"; | exon_number | "9";  | gene_type | " |
| Dt_chr3 | Cufflinks | exon | 15550959 | 15551225 | . | - | . | gene_id | "XLOC_177491"; | transcript_id | "Novel_002467"; | exon_number | "10"; | gene_type | " |
| Dt_chr3 | Cufflinks | exon | 15867797 | 15867866 | . | - | . | gene_id | "XLOC_177512"; | transcript_id | "Novel_002468"; | exon_number | "1";  | gene_type | " |
| Dt_chr3 | Cufflinks | exon | 15868761 | 15869385 | . | - | . | gene_id | "XLOC_177512"; | transcript_id | "Novel_002468"; | exon_number | "2";  | gene_type | " |
| Dt_chr3 | Cufflinks | exon | 17184433 | 17184647 | . | - | . | gene_id | "XLOC_177615"; | transcript_id | "Novel_002469"; | exon_number | "1";  | gene_type | " |
| Dt_chr3 | Cufflinks | exon | 20425079 | 20425603 | . | - | . | gene_id | "XLOC_177894"; | transcript_id | "Novel_002470"; | exon_number | "1";  | gene_type | " |
| Dt_chr3 | Cufflinks | exon | 20426369 | 20426660 | . | - | . | gene_id | "XLOC_177894"; | transcript_id | "Novel_002470"; | exon_number | "2";  | gene_type | " |
| Dt_chr3 | Cufflinks | exon | 20426748 | 20426939 | . | - | . | gene_id | "XLOC_177894"; | transcript_id | "Novel_002470"; | exon_number | "3";  | gene_type | " |
| Dt_chr3 | Cufflinks | exon | 20425079 | 20425603 | . | - | . | gene_id | "XLOC_177894"; | transcript_id | "Novel_002471"; | exon_number | "1";  | gene_type | " |
| Dt_chr3 | Cufflinks | exon | 20426369 | 20426660 | . | - | . | gene_id | "XLOC_177894"; | transcript_id | "Novel_002471"; | exon_number | "2";  | gene_type | " |
| Dt_chr3 | Cufflinks | exon | 20426748 | 20426870 | . | - | . | gene_id | "XLOC_177894"; | transcript_id | "Novel_002471"; | exon_number | "3";  | gene_type | " |
| Dt_chr3 | Cufflinks | exon | 20426965 | 20427782 | . | - | . | gene_id | "XLOC_177894"; | transcript_id | "Novel_002471"; | exon_number | "4";  | gene_type | " |
| Dt_chr3 | Cufflinks | exon | 20665344 | 20666574 | . | - | . | gene_id | "XLOC_177926"; | transcript_id | "Novel_002472"; | exon_number | "1";  | gene_type | " |
| Dt_chr3 | Cufflinks | exon | 20666756 | 20666941 | . | - | . | gene_id | "XLOC_177926"; | transcript_id | "Novel_002472"; | exon_number | "2";  | gene_type | " |
| Dt_chr3 | Cufflinks | exon | 20668658 | 20668835 | . | - | . | gene_id | "XLOC_177926"; | transcript_id | "Novel_002472"; | exon_number | "3";  | gene_type | " |
| Dt_chr3 | Cufflinks | exon | 22176025 | 22176194 | . | - | . | gene_id | "XLOC_178089"; | transcript_id | "Novel_002473"; | exon_number | "1";  | gene_type | " |
| Dt_chr3 | Cufflinks | exon | 22176292 | 22176363 | . | - | . | gene_id | "XLOC_178089"; | transcript_id | "Novel_002473"; | exon_number | "2";  | gene_type | " |
| Dt_chr3 | Cufflinks | exon | 22176707 | 22176774 | . | - | . | gene_id | "XLOC_178089"; | transcript_id | "Novel_002473"; | exon_number | "3";  | gene_type | " |
| Dt_chr3 | Cufflinks | exon | 22177209 | 22177285 | . | - | . | gene_id | "XLOC_178089"; | transcript_id | "Novel_002473"; | exon_number | "4";  | gene_type | " |
| Dt_chr3 | Cufflinks | exon | 22178677 | 22180964 | . | - | . | gene_id | "XLOC_178089"; | transcript_id | "Novel_002473"; | exon_number | "5";  | gene_type | " |
| Dt_chr3 | Cufflinks | exon | 22176039 | 22176194 | . | - | . | gene_id | "XLOC_178089"; | transcript_id | "Novel_002474"; | exon_number | "1";  | gene_type | " |
| Dt_chr3 | Cufflinks | exon | 22176292 | 22176363 | . | - | . | gene_id | "XLOC_178089"; | transcript_id | "Novel_002474"; | exon_number | "2";  | gene_type | " |
| Dt_chr3 | Cufflinks | exon | 22176707 | 22176774 | . | - | . | gene_id | "XLOC_178089"; | transcript_id | "Novel_002474"; | exon_number | "3";  | gene_type | " |
| Dt_chr3 | Cufflinks | exon | 22177209 | 22177285 | . | - | . | gene_id | "XLOC_178089"; | transcript_id | "Novel_002474"; | exon_number | "4";  | gene_type | " |
| Dt_chr3 | Cufflinks | exon | 22178677 | 22179373 | . | - | . | gene_id | "XLOC_178089"; | transcript_id | "Novel_002474"; | exon_number | "5";  | gene_type | " |
| Dt_chr3 | Cufflinks | exon | 22179796 | 22180016 | . | - | . | gene_id | "XLOC_178089"; | transcript_id | "Novel_002474"; | exon_number | "6";  | gene_type | " |

|         |           |      |          |          |   |   |   |         |                              |                             |                |   |
|---------|-----------|------|----------|----------|---|---|---|---------|------------------------------|-----------------------------|----------------|---|
| Dt_chr3 | Cufflinks | exon | 22180710 | 22180944 | . | - | . | gene_id | "XLOC_178089"; transcript_id | "Novel_002474"; exon_number | "7"; gene_type | " |
| Dt_chr3 | Cufflinks | exon | 22404246 | 22404965 | . | - | . | gene_id | "XLOC_178125"; transcript_id | "Novel_002475"; exon_number | "1"; gene_type | " |
| Dt_chr3 | Cufflinks | exon | 22405057 | 22405454 | . | - | . | gene_id | "XLOC_178125"; transcript_id | "Novel_002475"; exon_number | "2"; gene_type | " |
| Dt_chr3 | Cufflinks | exon | 22407804 | 22408362 | . | - | . | gene_id | "XLOC_178125"; transcript_id | "Novel_002475"; exon_number | "3"; gene_type | " |
| Dt_chr3 | Cufflinks | exon | 22422080 | 22422407 | . | - | . | gene_id | "XLOC_178128"; transcript_id | "Novel_002476"; exon_number | "1"; gene_type | " |
| Dt_chr3 | Cufflinks | exon | 22422533 | 22422640 | . | - | . | gene_id | "XLOC_178128"; transcript_id | "Novel_002476"; exon_number | "2"; gene_type | " |
| Dt_chr3 | Cufflinks | exon | 22422736 | 22422878 | . | - | . | gene_id | "XLOC_178128"; transcript_id | "Novel_002476"; exon_number | "3"; gene_type | " |
| Dt_chr3 | Cufflinks | exon | 22423777 | 22423824 | . | - | . | gene_id | "XLOC_178128"; transcript_id | "Novel_002476"; exon_number | "4"; gene_type | " |
| Dt_chr3 | Cufflinks | exon | 22423910 | 22424039 | . | - | . | gene_id | "XLOC_178128"; transcript_id | "Novel_002476"; exon_number | "5"; gene_type | " |
| Dt_chr3 | Cufflinks | exon | 22425485 | 22425832 | . | - | . | gene_id | "XLOC_178128"; transcript_id | "Novel_002476"; exon_number | "6"; gene_type | " |
| Dt_chr3 | Cufflinks | exon | 22425972 | 22427090 | . | - | . | gene_id | "XLOC_178128"; transcript_id | "Novel_002476"; exon_number | "7"; gene_type | " |
| Dt_chr3 | Cufflinks | exon | 22427229 | 22427413 | . | - | . | gene_id | "XLOC_178128"; transcript_id | "Novel_002476"; exon_number | "8"; gene_type | " |
| Dt_chr3 | Cufflinks | exon | 22427516 | 22427819 | . | - | . | gene_id | "XLOC_178128"; transcript_id | "Novel_002476"; exon_number | "9"; gene_type | " |
| Dt_chr3 | Cufflinks | exon | 22422208 | 22422407 | . | - | . | gene_id | "XLOC_178128"; transcript_id | "Novel_002477"; exon_number | "1"; gene_type | " |
| Dt_chr3 | Cufflinks | exon | 22422533 | 22422640 | . | - | . | gene_id | "XLOC_178128"; transcript_id | "Novel_002477"; exon_number | "2"; gene_type | " |
| Dt_chr3 | Cufflinks | exon | 22422736 | 22423251 | . | - | . | gene_id | "XLOC_178128"; transcript_id | "Novel_002477"; exon_number | "3"; gene_type | " |
| Dt_chr3 | Cufflinks | exon | 22771267 | 22773047 | . | - | . | gene_id | "XLOC_178160"; transcript_id | "Novel_002478"; exon_number | "1"; gene_type | " |
| Dt_chr3 | Cufflinks | exon | 22773324 | 22773583 | . | - | . | gene_id | "XLOC_178160"; transcript_id | "Novel_002478"; exon_number | "2"; gene_type | " |
| Dt_chr3 | Cufflinks | exon | 23800795 | 23801047 | . | - | . | gene_id | "XLOC_178305"; transcript_id | "Novel_002479"; exon_number | "1"; gene_type | " |
| Dt_chr3 | Cufflinks | exon | 24205659 | 24205766 | . | - | . | gene_id | "XLOC_178360"; transcript_id | "Novel_002480"; exon_number | "1"; gene_type | " |
| Dt_chr3 | Cufflinks | exon | 24205892 | 24206002 | . | - | . | gene_id | "XLOC_178360"; transcript_id | "Novel_002480"; exon_number | "2"; gene_type | " |
| Dt_chr3 | Cufflinks | exon | 24206369 | 24206602 | . | - | . | gene_id | "XLOC_178360"; transcript_id | "Novel_002480"; exon_number | "3"; gene_type | " |
| Dt_chr3 | Cufflinks | exon | 25710014 | 25710236 | . | - | . | gene_id | "XLOC_178516"; transcript_id | "Novel_002481"; exon_number | "1"; gene_type | " |
| Dt_chr3 | Cufflinks | exon | 25710701 | 25710740 | . | - | . | gene_id | "XLOC_178516"; transcript_id | "Novel_002481"; exon_number | "2"; gene_type | " |
| Dt_chr3 | Cufflinks | exon | 26258910 | 26259547 | . | - | . | gene_id | "XLOC_178575"; transcript_id | "Novel_002482"; exon_number | "1"; gene_type | " |
| Dt_chr3 | Cufflinks | exon | 26259837 | 26260016 | . | - | . | gene_id | "XLOC_178575"; transcript_id | "Novel_002482"; exon_number | "2"; gene_type | " |
| Dt_chr3 | Cufflinks | exon | 26260172 | 26260251 | . | - | . | gene_id | "XLOC_178575"; transcript_id | "Novel_002482"; exon_number | "3"; gene_type | " |
| Dt_chr3 | Cufflinks | exon | 26260645 | 26260770 | . | - | . | gene_id | "XLOC_178575"; transcript_id | "Novel_002482"; exon_number | "4"; gene_type | " |
| Dt_chr3 | Cufflinks | exon | 26260882 | 26261043 | . | - | . | gene_id | "XLOC_178575"; transcript_id | "Novel_002482"; exon_number | "5"; gene_type | " |
| Dt_chr3 | Cufflinks | exon | 26261218 | 26261335 | . | - | . | gene_id | "XLOC_178575"; transcript_id | "Novel_002482"; exon_number | "6"; gene_type | " |
| Dt_chr3 | Cufflinks | exon | 26261457 | 26261523 | . | - | . | gene_id | "XLOC_178575"; transcript_id | "Novel_002482"; exon_number | "7"; gene_type | " |
| Dt_chr3 | Cufflinks | exon | 26258967 | 26259547 | . | - | . | gene_id | "XLOC_178575"; transcript_id | "Novel_002483"; exon_number | "1"; gene_type | " |
| Dt_chr3 | Cufflinks | exon | 26259837 | 26260016 | . | - | . | gene_id | "XLOC_178575"; transcript_id | "Novel_002483"; exon_number | "2"; gene_type | " |
| Dt_chr3 | Cufflinks | exon | 26260645 | 26260770 | . | - | . | gene_id | "XLOC_178575"; transcript_id | "Novel_002483"; exon_number | "3"; gene_type | " |
| Dt_chr3 | Cufflinks | exon | 26260882 | 26261043 | . | - | . | gene_id | "XLOC_178575"; transcript_id | "Novel_002483"; exon_number | "4"; gene_type | " |





|         |           |      |          |          |   |   |   |         |                |               |                 |             |      |           |   |
|---------|-----------|------|----------|----------|---|---|---|---------|----------------|---------------|-----------------|-------------|------|-----------|---|
| Dt_chr3 | Cufflinks | exon | 27461975 | 27463020 | . | - | . | gene_id | "XLOC_178643"; | transcript_id | "Novel_002493"; | exon_number | "4"; | gene_type | " |
| Dt_chr3 | Cufflinks | exon | 27524809 | 27525233 | . | - | . | gene_id | "XLOC_178646"; | transcript_id | "Novel_002494"; | exon_number | "1"; | gene_type | " |
| Dt_chr3 | Cufflinks | exon | 27526038 | 27526123 | . | - | . | gene_id | "XLOC_178646"; | transcript_id | "Novel_002494"; | exon_number | "2"; | gene_type | " |
| Dt_chr3 | Cufflinks | exon | 27527166 | 27527289 | . | - | . | gene_id | "XLOC_178646"; | transcript_id | "Novel_002494"; | exon_number | "3"; | gene_type | " |
| Dt_chr3 | Cufflinks | exon | 27527376 | 27527637 | . | - | . | gene_id | "XLOC_178646"; | transcript_id | "Novel_002494"; | exon_number | "4"; | gene_type | " |
| Dt_chr3 | Cufflinks | exon | 27524848 | 27525233 | . | - | . | gene_id | "XLOC_178646"; | transcript_id | "Novel_002495"; | exon_number | "1"; | gene_type | " |
| Dt_chr3 | Cufflinks | exon | 27526038 | 27526123 | . | - | . | gene_id | "XLOC_178646"; | transcript_id | "Novel_002495"; | exon_number | "2"; | gene_type | " |
| Dt_chr3 | Cufflinks | exon | 27527166 | 27527725 | . | - | . | gene_id | "XLOC_178646"; | transcript_id | "Novel_002495"; | exon_number | "3"; | gene_type | " |
| Dt_chr3 | Cufflinks | exon | 27524858 | 27525233 | . | - | . | gene_id | "XLOC_178646"; | transcript_id | "Novel_002496"; | exon_number | "1"; | gene_type | " |
| Dt_chr3 | Cufflinks | exon | 27526038 | 27527626 | . | - | . | gene_id | "XLOC_178646"; | transcript_id | "Novel_002496"; | exon_number | "2"; | gene_type | " |
| Dt_chr3 | Cufflinks | exon | 27524885 | 27525233 | . | - | . | gene_id | "XLOC_178646"; | transcript_id | "Novel_002497"; | exon_number | "1"; | gene_type | " |
| Dt_chr3 | Cufflinks | exon | 27526038 | 27526194 | . | - | . | gene_id | "XLOC_178646"; | transcript_id | "Novel_002497"; | exon_number | "2"; | gene_type | " |
| Dt_chr3 | Cufflinks | exon | 27527166 | 27527596 | . | - | . | gene_id | "XLOC_178646"; | transcript_id | "Novel_002497"; | exon_number | "3"; | gene_type | " |
| Dt_chr3 | Cufflinks | exon | 27652446 | 27653891 | . | - | . | gene_id | "XLOC_178682"; | transcript_id | "Novel_002498"; | exon_number | "1"; | gene_type | " |
| Dt_chr3 | Cufflinks | exon | 27654567 | 27654620 | . | - | . | gene_id | "XLOC_178682"; | transcript_id | "Novel_002498"; | exon_number | "2"; | gene_type | " |
| Dt_chr3 | Cufflinks | exon | 27654905 | 27655061 | . | - | . | gene_id | "XLOC_178682"; | transcript_id | "Novel_002498"; | exon_number | "3"; | gene_type | " |
| Dt_chr3 | Cufflinks | exon | 35692364 | 35692580 | . | - | . | gene_id | "XLOC_179086"; | transcript_id | "Novel_002499"; | exon_number | "1"; | gene_type | " |
| Dt_chr3 | Cufflinks | exon | 35834976 | 35836467 | . | - | . | gene_id | "XLOC_179094"; | transcript_id | "Novel_002500"; | exon_number | "1"; | gene_type | " |
| Dt_chr3 | Cufflinks | exon | 35836700 | 35836884 | . | - | . | gene_id | "XLOC_179094"; | transcript_id | "Novel_002500"; | exon_number | "2"; | gene_type | " |
| Dt_chr3 | Cufflinks | exon | 38108984 | 38109355 | . | - | . | gene_id | "XLOC_179189"; | transcript_id | "Novel_002501"; | exon_number | "1"; | gene_type | " |
| Dt_chr3 | Cufflinks | exon | 38109696 | 38109803 | . | - | . | gene_id | "XLOC_179189"; | transcript_id | "Novel_002501"; | exon_number | "2"; | gene_type | " |
| Dt_chr3 | Cufflinks | exon | 38110105 | 38110200 | . | - | . | gene_id | "XLOC_179189"; | transcript_id | "Novel_002501"; | exon_number | "3"; | gene_type | " |
| Dt_chr3 | Cufflinks | exon | 38110279 | 38110441 | . | - | . | gene_id | "XLOC_179189"; | transcript_id | "Novel_002501"; | exon_number | "4"; | gene_type | " |
| Dt_chr3 | Cufflinks | exon | 38110526 | 38110552 | . | - | . | gene_id | "XLOC_179189"; | transcript_id | "Novel_002501"; | exon_number | "5"; | gene_type | " |
| Dt_chr3 | Cufflinks | exon | 38110694 | 38110747 | . | - | . | gene_id | "XLOC_179189"; | transcript_id | "Novel_002501"; | exon_number | "6"; | gene_type | " |
| Dt_chr3 | Cufflinks | exon | 38111086 | 38111220 | . | - | . | gene_id | "XLOC_179189"; | transcript_id | "Novel_002501"; | exon_number | "7"; | gene_type | " |
| Dt_chr3 | Cufflinks | exon | 38111309 | 38111577 | . | - | . | gene_id | "XLOC_179189"; | transcript_id | "Novel_002501"; | exon_number | "8"; | gene_type | " |
| Dt_chr4 | Cufflinks | exon | 6198803  | 6199012  | . | + | . | gene_id | "XLOC_179721"; | transcript_id | "Novel_002502"; | exon_number | "1"; | gene_type | " |
| Dt_chr4 | Cufflinks | exon | 6210731  | 6211010  | . | + | . | gene_id | "XLOC_179722"; | transcript_id | "Novel_002503"; | exon_number | "1"; | gene_type | " |
| Dt_chr4 | Cufflinks | exon | 6285248  | 6285448  | . | + | . | gene_id | "XLOC_179739"; | transcript_id | "Novel_002504"; | exon_number | "1"; | gene_type | " |
| Dt_chr4 | Cufflinks | exon | 6286115  | 6286438  | . | + | . | gene_id | "XLOC_179739"; | transcript_id | "Novel_002504"; | exon_number | "2"; | gene_type | " |
| Dt_chr4 | Cufflinks | exon | 7733194  | 7736645  | . | + | . | gene_id | "XLOC_179824"; | transcript_id | "Novel_002505"; | exon_number | "1"; | gene_type | " |
| Dt_chr4 | Cufflinks | exon | 7737342  | 7737546  | . | + | . | gene_id | "XLOC_179824"; | transcript_id | "Novel_002505"; | exon_number | "2"; | gene_type | " |
| Dt_chr4 | Cufflinks | exon | 7767308  | 7767360  | . | + | . | gene_id | "XLOC_179835"; | transcript_id | "Novel_002506"; | exon_number | "1"; | gene_type | " |
| Dt_chr4 | Cufflinks | exon | 7767461  | 7767562  | . | + | . | gene_id | "XLOC_179835"; | transcript_id | "Novel_002506"; | exon_number | "2"; | gene_type | " |

|         |           |      |          |          |   |   |   |         |                |               |                 |             |      |           |   |
|---------|-----------|------|----------|----------|---|---|---|---------|----------------|---------------|-----------------|-------------|------|-----------|---|
| Dt_chr4 | Cufflinks | exon | 7767677  | 7767720  | . | + | . | gene_id | "XLOC_179835"; | transcript_id | "Novel_002506"; | exon_number | "3"; | gene_type | " |
| Dt_chr4 | Cufflinks | exon | 7770406  | 7770483  | . | + | . | gene_id | "XLOC_179835"; | transcript_id | "Novel_002506"; | exon_number | "4"; | gene_type | " |
| Dt_chr4 | Cufflinks | exon | 7770580  | 7770633  | . | + | . | gene_id | "XLOC_179835"; | transcript_id | "Novel_002506"; | exon_number | "5"; | gene_type | " |
| Dt_chr4 | Cufflinks | exon | 7770768  | 7770838  | . | + | . | gene_id | "XLOC_179835"; | transcript_id | "Novel_002506"; | exon_number | "6"; | gene_type | " |
| Dt_chr4 | Cufflinks | exon | 7771273  | 7771554  | . | + | . | gene_id | "XLOC_179835"; | transcript_id | "Novel_002506"; | exon_number | "7"; | gene_type | " |
| Dt_chr4 | Cufflinks | exon | 7767308  | 7767360  | . | + | . | gene_id | "XLOC_179835"; | transcript_id | "Novel_002507"; | exon_number | "1"; | gene_type | " |
| Dt_chr4 | Cufflinks | exon | 7767461  | 7767562  | . | + | . | gene_id | "XLOC_179835"; | transcript_id | "Novel_002507"; | exon_number | "2"; | gene_type | " |
| Dt_chr4 | Cufflinks | exon | 7767677  | 7767720  | . | + | . | gene_id | "XLOC_179835"; | transcript_id | "Novel_002507"; | exon_number | "3"; | gene_type | " |
| Dt_chr4 | Cufflinks | exon | 7770406  | 7770483  | . | + | . | gene_id | "XLOC_179835"; | transcript_id | "Novel_002507"; | exon_number | "4"; | gene_type | " |
| Dt_chr4 | Cufflinks | exon | 7770580  | 7770633  | . | + | . | gene_id | "XLOC_179835"; | transcript_id | "Novel_002507"; | exon_number | "5"; | gene_type | " |
| Dt_chr4 | Cufflinks | exon | 7770768  | 7771554  | . | + | . | gene_id | "XLOC_179835"; | transcript_id | "Novel_002507"; | exon_number | "6"; | gene_type | " |
| Dt_chr4 | Cufflinks | exon | 7767349  | 7767562  | . | + | . | gene_id | "XLOC_179835"; | transcript_id | "Novel_002508"; | exon_number | "1"; | gene_type | " |
| Dt_chr4 | Cufflinks | exon | 7767677  | 7767720  | . | + | . | gene_id | "XLOC_179835"; | transcript_id | "Novel_002508"; | exon_number | "2"; | gene_type | " |
| Dt_chr4 | Cufflinks | exon | 7770406  | 7770483  | . | + | . | gene_id | "XLOC_179835"; | transcript_id | "Novel_002508"; | exon_number | "3"; | gene_type | " |
| Dt_chr4 | Cufflinks | exon | 7770580  | 7770633  | . | + | . | gene_id | "XLOC_179835"; | transcript_id | "Novel_002508"; | exon_number | "4"; | gene_type | " |
| Dt_chr4 | Cufflinks | exon | 7770768  | 7770838  | . | + | . | gene_id | "XLOC_179835"; | transcript_id | "Novel_002508"; | exon_number | "5"; | gene_type | " |
| Dt_chr4 | Cufflinks | exon | 7771273  | 7771509  | . | + | . | gene_id | "XLOC_179835"; | transcript_id | "Novel_002508"; | exon_number | "6"; | gene_type | " |
| Dt_chr4 | Cufflinks | exon | 9821979  | 9822222  | . | + | . | gene_id | "XLOC_179924"; | transcript_id | "Novel_002509"; | exon_number | "1"; | gene_type | " |
| Dt_chr4 | Cufflinks | exon | 9822988  | 9823091  | . | + | . | gene_id | "XLOC_179924"; | transcript_id | "Novel_002509"; | exon_number | "2"; | gene_type | " |
| Dt_chr4 | Cufflinks | exon | 9823740  | 9823801  | . | + | . | gene_id | "XLOC_179924"; | transcript_id | "Novel_002509"; | exon_number | "3"; | gene_type | " |
| Dt_chr4 | Cufflinks | exon | 9821979  | 9822222  | . | + | . | gene_id | "XLOC_179924"; | transcript_id | "Novel_002510"; | exon_number | "1"; | gene_type | " |
| Dt_chr4 | Cufflinks | exon | 9823000  | 9823091  | . | + | . | gene_id | "XLOC_179924"; | transcript_id | "Novel_002510"; | exon_number | "2"; | gene_type | " |
| Dt_chr4 | Cufflinks | exon | 9823740  | 9823802  | . | + | . | gene_id | "XLOC_179924"; | transcript_id | "Novel_002510"; | exon_number | "3"; | gene_type | " |
| Dt_chr4 | Cufflinks | exon | 10054491 | 10056855 | . | + | . | gene_id | "XLOC_179939"; | transcript_id | "Novel_002511"; | exon_number | "1"; | gene_type | " |
| Dt_chr4 | Cufflinks | exon | 10056953 | 10058082 | . | + | . | gene_id | "XLOC_179939"; | transcript_id | "Novel_002511"; | exon_number | "2"; | gene_type | " |
| Dt_chr4 | Cufflinks | exon | 10054504 | 10055479 | . | + | . | gene_id | "XLOC_179939"; | transcript_id | "Novel_002512"; | exon_number | "1"; | gene_type | " |
| Dt_chr4 | Cufflinks | exon | 10055563 | 10056847 | . | + | . | gene_id | "XLOC_179939"; | transcript_id | "Novel_002512"; | exon_number | "2"; | gene_type | " |
| Dt_chr4 | Cufflinks | exon | 11295772 | 11296031 | . | + | . | gene_id | "XLOC_180024"; | transcript_id | "Novel_002513"; | exon_number | "1"; | gene_type | " |
| Dt_chr4 | Cufflinks | exon | 11296267 | 11296359 | . | + | . | gene_id | "XLOC_180024"; | transcript_id | "Novel_002513"; | exon_number | "2"; | gene_type | " |
| Dt_chr4 | Cufflinks | exon | 11297336 | 11297397 | . | + | . | gene_id | "XLOC_180024"; | transcript_id | "Novel_002513"; | exon_number | "3"; | gene_type | " |
| Dt_chr4 | Cufflinks | exon | 11297526 | 11298912 | . | + | . | gene_id | "XLOC_180024"; | transcript_id | "Novel_002513"; | exon_number | "4"; | gene_type | " |
| Dt_chr4 | Cufflinks | exon | 11299002 | 11299688 | . | + | . | gene_id | "XLOC_180024"; | transcript_id | "Novel_002513"; | exon_number | "5"; | gene_type | " |
| Dt_chr4 | Cufflinks | exon | 11299783 | 11299866 | . | + | . | gene_id | "XLOC_180024"; | transcript_id | "Novel_002513"; | exon_number | "6"; | gene_type | " |
| Dt_chr4 | Cufflinks | exon | 11300059 | 11300134 | . | + | . | gene_id | "XLOC_180024"; | transcript_id | "Novel_002513"; | exon_number | "7"; | gene_type | " |
| Dt_chr4 | Cufflinks | exon | 11300273 | 11300589 | . | + | . | gene_id | "XLOC_180024"; | transcript_id | "Novel_002513"; | exon_number | "8"; | gene_type | " |

|         |           |      |          |          |   |   |   |         |                |               |                 |             |      |           |   |
|---------|-----------|------|----------|----------|---|---|---|---------|----------------|---------------|-----------------|-------------|------|-----------|---|
| Dt_chr4 | Cufflinks | exon | 11300695 | 11302813 | . | + | . | gene_id | "XLOC_180024"; | transcript_id | "Novel_002513"; | exon_number | "9"; | gene_type | " |
| Dt_chr4 | Cufflinks | exon | 11295883 | 11296031 | . | + | . | gene_id | "XLOC_180024"; | transcript_id | "Novel_002514"; | exon_number | "1"; | gene_type | " |
| Dt_chr4 | Cufflinks | exon | 11296267 | 11296359 | . | + | . | gene_id | "XLOC_180024"; | transcript_id | "Novel_002514"; | exon_number | "2"; | gene_type | " |
| Dt_chr4 | Cufflinks | exon | 11297526 | 11298912 | . | + | . | gene_id | "XLOC_180024"; | transcript_id | "Novel_002514"; | exon_number | "3"; | gene_type | " |
| Dt_chr4 | Cufflinks | exon | 11299002 | 11299688 | . | + | . | gene_id | "XLOC_180024"; | transcript_id | "Novel_002514"; | exon_number | "4"; | gene_type | " |
| Dt_chr4 | Cufflinks | exon | 11299783 | 11299866 | . | + | . | gene_id | "XLOC_180024"; | transcript_id | "Novel_002514"; | exon_number | "5"; | gene_type | " |
| Dt_chr4 | Cufflinks | exon | 11300059 | 11300134 | . | + | . | gene_id | "XLOC_180024"; | transcript_id | "Novel_002514"; | exon_number | "6"; | gene_type | " |
| Dt_chr4 | Cufflinks | exon | 11300273 | 11300589 | . | + | . | gene_id | "XLOC_180024"; | transcript_id | "Novel_002514"; | exon_number | "7"; | gene_type | " |
| Dt_chr4 | Cufflinks | exon | 11300695 | 11301977 | . | + | . | gene_id | "XLOC_180024"; | transcript_id | "Novel_002514"; | exon_number | "8"; | gene_type | " |
| Dt_chr4 | Cufflinks | exon | 11302068 | 11302781 | . | + | . | gene_id | "XLOC_180024"; | transcript_id | "Novel_002514"; | exon_number | "9"; | gene_type | " |
| Dt_chr4 | Cufflinks | exon | 14372817 | 14372986 | . | + | . | gene_id | "XLOC_180170"; | transcript_id | "Novel_002515"; | exon_number | "1"; | gene_type | " |
| Dt_chr4 | Cufflinks | exon | 14373260 | 14373327 | . | + | . | gene_id | "XLOC_180170"; | transcript_id | "Novel_002515"; | exon_number | "2"; | gene_type | " |
| Dt_chr4 | Cufflinks | exon | 14374070 | 14375284 | . | + | . | gene_id | "XLOC_180170"; | transcript_id | "Novel_002515"; | exon_number | "3"; | gene_type | " |
| Dt_chr4 | Cufflinks | exon | 14372817 | 14372986 | . | + | . | gene_id | "XLOC_180170"; | transcript_id | "Novel_002516"; | exon_number | "1"; | gene_type | " |
| Dt_chr4 | Cufflinks | exon | 14373260 | 14373327 | . | + | . | gene_id | "XLOC_180170"; | transcript_id | "Novel_002516"; | exon_number | "2"; | gene_type | " |
| Dt_chr4 | Cufflinks | exon | 14374273 | 14375284 | . | + | . | gene_id | "XLOC_180170"; | transcript_id | "Novel_002516"; | exon_number | "3"; | gene_type | " |
| Dt_chr4 | Cufflinks | exon | 14373157 | 14373327 | . | + | . | gene_id | "XLOC_180170"; | transcript_id | "Novel_002517"; | exon_number | "1"; | gene_type | " |
| Dt_chr4 | Cufflinks | exon | 14374273 | 14375284 | . | + | . | gene_id | "XLOC_180170"; | transcript_id | "Novel_002517"; | exon_number | "2"; | gene_type | " |
| Dt_chr4 | Cufflinks | exon | 15060058 | 15060411 | . | + | . | gene_id | "XLOC_180239"; | transcript_id | "Novel_002518"; | exon_number | "1"; | gene_type | " |
| Dt_chr4 | Cufflinks | exon | 15060764 | 15061163 | . | + | . | gene_id | "XLOC_180239"; | transcript_id | "Novel_002518"; | exon_number | "2"; | gene_type | " |
| Dt_chr4 | Cufflinks | exon | 15061253 | 15063254 | . | + | . | gene_id | "XLOC_180239"; | transcript_id | "Novel_002518"; | exon_number | "3"; | gene_type | " |
| Dt_chr4 | Cufflinks | exon | 15060063 | 15060856 | . | + | . | gene_id | "XLOC_180239"; | transcript_id | "Novel_002519"; | exon_number | "1"; | gene_type | " |
| Dt_chr4 | Cufflinks | exon | 15061055 | 15061163 | . | + | . | gene_id | "XLOC_180239"; | transcript_id | "Novel_002519"; | exon_number | "2"; | gene_type | " |
| Dt_chr4 | Cufflinks | exon | 15061253 | 15062462 | . | + | . | gene_id | "XLOC_180239"; | transcript_id | "Novel_002519"; | exon_number | "3"; | gene_type | " |
| Dt_chr4 | Cufflinks | exon | 15060063 | 15060411 | . | + | . | gene_id | "XLOC_180239"; | transcript_id | "Novel_002520"; | exon_number | "1"; | gene_type | " |
| Dt_chr4 | Cufflinks | exon | 15061055 | 15061163 | . | + | . | gene_id | "XLOC_180239"; | transcript_id | "Novel_002520"; | exon_number | "2"; | gene_type | " |
| Dt_chr4 | Cufflinks | exon | 15061253 | 15062462 | . | + | . | gene_id | "XLOC_180239"; | transcript_id | "Novel_002520"; | exon_number | "3"; | gene_type | " |
| Dt_chr4 | Cufflinks | exon | 15340642 | 15340862 | . | + | . | gene_id | "XLOC_180279"; | transcript_id | "Novel_002521"; | exon_number | "1"; | gene_type | " |
| Dt_chr4 | Cufflinks | exon | 15503777 | 15504068 | . | + | . | gene_id | "XLOC_180295"; | transcript_id | "Novel_002522"; | exon_number | "1"; | gene_type | " |
| Dt_chr4 | Cufflinks | exon | 15505057 | 15505406 | . | + | . | gene_id | "XLOC_180295"; | transcript_id | "Novel_002522"; | exon_number | "2"; | gene_type | " |
| Dt_chr4 | Cufflinks | exon | 15505483 | 15507645 | . | + | . | gene_id | "XLOC_180295"; | transcript_id | "Novel_002522"; | exon_number | "3"; | gene_type | " |
| Dt_chr4 | Cufflinks | exon | 15503876 | 15504068 | . | + | . | gene_id | "XLOC_180295"; | transcript_id | "Novel_002523"; | exon_number | "1"; | gene_type | " |
| Dt_chr4 | Cufflinks | exon | 15505483 | 15508015 | . | + | . | gene_id | "XLOC_180295"; | transcript_id | "Novel_002523"; | exon_number | "2"; | gene_type | " |
| Dt_chr4 | Cufflinks | exon | 15503887 | 15504068 | . | + | . | gene_id | "XLOC_180295"; | transcript_id | "Novel_002524"; | exon_number | "1"; | gene_type | " |
| Dt_chr4 | Cufflinks | exon | 15505057 | 15508015 | . | + | . | gene_id | "XLOC_180295"; | transcript_id | "Novel_002524"; | exon_number | "2"; | gene_type | " |

|         |           |      |          |          |   |   |   |         |                |               |                 |             |       |           |   |
|---------|-----------|------|----------|----------|---|---|---|---------|----------------|---------------|-----------------|-------------|-------|-----------|---|
| Dt_chr4 | Cufflinks | exon | 15503887 | 15504068 | . | + | . | gene_id | "XLOC_180295"; | transcript_id | "Novel_002525"; | exon_number | "1";  | gene_type | " |
| Dt_chr4 | Cufflinks | exon | 15505502 | 15508015 | . | + | . | gene_id | "XLOC_180295"; | transcript_id | "Novel_002525"; | exon_number | "2";  | gene_type | " |
| Dt_chr4 | Cufflinks | exon | 15504709 | 15505406 | . | + | . | gene_id | "XLOC_180295"; | transcript_id | "Novel_002526"; | exon_number | "1";  | gene_type | " |
| Dt_chr4 | Cufflinks | exon | 15505483 | 15507645 | . | + | . | gene_id | "XLOC_180295"; | transcript_id | "Novel_002526"; | exon_number | "2";  | gene_type | " |
| Dt_chr4 | Cufflinks | exon | 16522179 | 16525604 | . | + | . | gene_id | "XLOC_180362"; | transcript_id | "Novel_002527"; | exon_number | "1";  | gene_type | " |
| Dt_chr4 | Cufflinks | exon | 16525738 | 16525830 | . | + | . | gene_id | "XLOC_180362"; | transcript_id | "Novel_002527"; | exon_number | "2";  | gene_type | " |
| Dt_chr4 | Cufflinks | exon | 16525992 | 16526264 | . | + | . | gene_id | "XLOC_180362"; | transcript_id | "Novel_002527"; | exon_number | "3";  | gene_type | " |
| Dt_chr4 | Cufflinks | exon | 16522180 | 16522257 | . | + | . | gene_id | "XLOC_180362"; | transcript_id | "Novel_002528"; | exon_number | "1";  | gene_type | " |
| Dt_chr4 | Cufflinks | exon | 16523181 | 16523242 | . | + | . | gene_id | "XLOC_180362"; | transcript_id | "Novel_002528"; | exon_number | "2";  | gene_type | " |
| Dt_chr4 | Cufflinks | exon | 16523592 | 16523702 | . | + | . | gene_id | "XLOC_180362"; | transcript_id | "Novel_002528"; | exon_number | "3";  | gene_type | " |
| Dt_chr4 | Cufflinks | exon | 16523787 | 16524040 | . | + | . | gene_id | "XLOC_180362"; | transcript_id | "Novel_002528"; | exon_number | "4";  | gene_type | " |
| Dt_chr4 | Cufflinks | exon | 16525485 | 16525604 | . | + | . | gene_id | "XLOC_180362"; | transcript_id | "Novel_002528"; | exon_number | "5";  | gene_type | " |
| Dt_chr4 | Cufflinks | exon | 16525738 | 16525830 | . | + | . | gene_id | "XLOC_180362"; | transcript_id | "Novel_002528"; | exon_number | "6";  | gene_type | " |
| Dt_chr4 | Cufflinks | exon | 16525992 | 16526197 | . | + | . | gene_id | "XLOC_180362"; | transcript_id | "Novel_002528"; | exon_number | "7";  | gene_type | " |
| Dt_chr4 | Cufflinks | exon | 20177563 | 20178052 | . | + | . | gene_id | "XLOC_180544"; | transcript_id | "Novel_002529"; | exon_number | "1";  | gene_type | " |
| Dt_chr4 | Cufflinks | exon | 20178180 | 20178498 | . | + | . | gene_id | "XLOC_180544"; | transcript_id | "Novel_002529"; | exon_number | "2";  | gene_type | " |
| Dt_chr4 | Cufflinks | exon | 20178611 | 20178703 | . | + | . | gene_id | "XLOC_180544"; | transcript_id | "Novel_002529"; | exon_number | "3";  | gene_type | " |
| Dt_chr4 | Cufflinks | exon | 20178797 | 20178887 | . | + | . | gene_id | "XLOC_180544"; | transcript_id | "Novel_002529"; | exon_number | "4";  | gene_type | " |
| Dt_chr4 | Cufflinks | exon | 20179425 | 20179491 | . | + | . | gene_id | "XLOC_180544"; | transcript_id | "Novel_002529"; | exon_number | "5";  | gene_type | " |
| Dt_chr4 | Cufflinks | exon | 20180127 | 20180169 | . | + | . | gene_id | "XLOC_180544"; | transcript_id | "Novel_002529"; | exon_number | "6";  | gene_type | " |
| Dt_chr4 | Cufflinks | exon | 20180562 | 20180733 | . | + | . | gene_id | "XLOC_180544"; | transcript_id | "Novel_002529"; | exon_number | "7";  | gene_type | " |
| Dt_chr4 | Cufflinks | exon | 20180818 | 20180916 | . | + | . | gene_id | "XLOC_180544"; | transcript_id | "Novel_002529"; | exon_number | "8";  | gene_type | " |
| Dt_chr4 | Cufflinks | exon | 20181019 | 20181087 | . | + | . | gene_id | "XLOC_180544"; | transcript_id | "Novel_002529"; | exon_number | "9";  | gene_type | " |
| Dt_chr4 | Cufflinks | exon | 20181356 | 20181494 | . | + | . | gene_id | "XLOC_180544"; | transcript_id | "Novel_002529"; | exon_number | "10"; | gene_type | " |
| Dt_chr4 | Cufflinks | exon | 20181744 | 20181945 | . | + | . | gene_id | "XLOC_180544"; | transcript_id | "Novel_002529"; | exon_number | "11"; | gene_type | " |
| Dt_chr4 | Cufflinks | exon | 20182583 | 20182686 | . | + | . | gene_id | "XLOC_180544"; | transcript_id | "Novel_002529"; | exon_number | "12"; | gene_type | " |
| Dt_chr4 | Cufflinks | exon | 20182846 | 20182885 | . | + | . | gene_id | "XLOC_180544"; | transcript_id | "Novel_002529"; | exon_number | "13"; | gene_type | " |
| Dt_chr4 | Cufflinks | exon | 20183604 | 20184943 | . | + | . | gene_id | "XLOC_180544"; | transcript_id | "Novel_002529"; | exon_number | "14"; | gene_type | " |
| Dt_chr4 | Cufflinks | exon | 20177610 | 20178052 | . | + | . | gene_id | "XLOC_180544"; | transcript_id | "Novel_002530"; | exon_number | "1";  | gene_type | " |
| Dt_chr4 | Cufflinks | exon | 20178180 | 20178498 | . | + | . | gene_id | "XLOC_180544"; | transcript_id | "Novel_002530"; | exon_number | "2";  | gene_type | " |
| Dt_chr4 | Cufflinks | exon | 20178611 | 20178703 | . | + | . | gene_id | "XLOC_180544"; | transcript_id | "Novel_002530"; | exon_number | "3";  | gene_type | " |
| Dt_chr4 | Cufflinks | exon | 20178797 | 20178887 | . | + | . | gene_id | "XLOC_180544"; | transcript_id | "Novel_002530"; | exon_number | "4";  | gene_type | " |
| Dt_chr4 | Cufflinks | exon | 20179425 | 20179491 | . | + | . | gene_id | "XLOC_180544"; | transcript_id | "Novel_002530"; | exon_number | "5";  | gene_type | " |
| Dt_chr4 | Cufflinks | exon | 20180127 | 20180169 | . | + | . | gene_id | "XLOC_180544"; | transcript_id | "Novel_002530"; | exon_number | "6";  | gene_type | " |
| Dt_chr4 | Cufflinks | exon | 20180562 | 20180733 | . | + | . | gene_id | "XLOC_180544"; | transcript_id | "Novel_002530"; | exon_number | "7";  | gene_type | " |



|         |           |      |          |          |   |   |   |         |                |               |                 |             |       |           |  |
|---------|-----------|------|----------|----------|---|---|---|---------|----------------|---------------|-----------------|-------------|-------|-----------|--|
| Dt_chr4 | Cufflinks | exon | 20182583 | 20182686 | . | + | . | gene_id | "XLOC_180544"; | transcript_id | "Novel_002532"; | exon_number | "12"; | gene_type |  |
| Dt_chr4 | Cufflinks | exon | 20182846 | 20182885 | . | + | . | gene_id | "XLOC_180544"; | transcript_id | "Novel_002532"; | exon_number | "13"; | gene_type |  |
| Dt_chr4 | Cufflinks | exon | 20183604 | 20183821 | . | + | . | gene_id | "XLOC_180544"; | transcript_id | "Novel_002532"; | exon_number | "14"; | gene_type |  |
| Dt_chr4 | Cufflinks | exon | 20184032 | 20184097 | . | + | . | gene_id | "XLOC_180544"; | transcript_id | "Novel_002532"; | exon_number | "15"; | gene_type |  |
| Dt_chr4 | Cufflinks | exon | 20184219 | 20184369 | . | + | . | gene_id | "XLOC_180544"; | transcript_id | "Novel_002532"; | exon_number | "16"; | gene_type |  |
| Dt_chr4 | Cufflinks | exon | 20184540 | 20185542 | . | + | . | gene_id | "XLOC_180544"; | transcript_id | "Novel_002532"; | exon_number | "17"; | gene_type |  |
| Dt_chr4 | Cufflinks | exon | 22208153 | 22208546 | . | + | . | gene_id | "XLOC_180682"; | transcript_id | "Novel_002533"; | exon_number | "1";  | gene_type |  |
| Dt_chr4 | Cufflinks | exon | 22208652 | 22209003 | . | + | . | gene_id | "XLOC_180682"; | transcript_id | "Novel_002533"; | exon_number | "2";  | gene_type |  |
| Dt_chr4 | Cufflinks | exon | 22208233 | 22208542 | . | + | . | gene_id | "XLOC_180682"; | transcript_id | "Novel_002534"; | exon_number | "1";  | gene_type |  |
| Dt_chr4 | Cufflinks | exon | 22208652 | 22209026 | . | + | . | gene_id | "XLOC_180682"; | transcript_id | "Novel_002534"; | exon_number | "2";  | gene_type |  |
| Dt_chr4 | Cufflinks | exon | 22208236 | 22208546 | . | + | . | gene_id | "XLOC_180682"; | transcript_id | "Novel_002535"; | exon_number | "1";  | gene_type |  |
| Dt_chr4 | Cufflinks | exon | 22208655 | 22209028 | . | + | . | gene_id | "XLOC_180682"; | transcript_id | "Novel_002535"; | exon_number | "2";  | gene_type |  |
| Dt_chr4 | Cufflinks | exon | 22704104 | 22704197 | . | + | . | gene_id | "XLOC_180740"; | transcript_id | "Novel_002536"; | exon_number | "1";  | gene_type |  |
| Dt_chr4 | Cufflinks | exon | 22704290 | 22704379 | . | + | . | gene_id | "XLOC_180740"; | transcript_id | "Novel_002536"; | exon_number | "2";  | gene_type |  |
| Dt_chr4 | Cufflinks | exon | 22704474 | 22704602 | . | + | . | gene_id | "XLOC_180740"; | transcript_id | "Novel_002536"; | exon_number | "3";  | gene_type |  |
| Dt_chr4 | Cufflinks | exon | 22704706 | 22704888 | . | + | . | gene_id | "XLOC_180740"; | transcript_id | "Novel_002536"; | exon_number | "4";  | gene_type |  |
| Dt_chr4 | Cufflinks | exon | 22705639 | 22706029 | . | + | . | gene_id | "XLOC_180740"; | transcript_id | "Novel_002536"; | exon_number | "5";  | gene_type |  |
| Dt_chr4 | Cufflinks | exon | 23282549 | 23282811 | . | + | . | gene_id | "XLOC_180791"; | transcript_id | "Novel_002537"; | exon_number | "1";  | gene_type |  |
| Dt_chr4 | Cufflinks | exon | 23396111 | 23396148 | . | + | . | gene_id | "XLOC_180799"; | transcript_id | "Novel_002538"; | exon_number | "1";  | gene_type |  |
| Dt_chr4 | Cufflinks | exon | 23396390 | 23396413 | . | + | . | gene_id | "XLOC_180799"; | transcript_id | "Novel_002538"; | exon_number | "2";  | gene_type |  |
| Dt_chr4 | Cufflinks | exon | 23396486 | 23397168 | . | + | . | gene_id | "XLOC_180799"; | transcript_id | "Novel_002538"; | exon_number | "3";  | gene_type |  |
| Dt_chr4 | Cufflinks | exon | 23397505 | 23397611 | . | + | . | gene_id | "XLOC_180799"; | transcript_id | "Novel_002538"; | exon_number | "4";  | gene_type |  |
| Dt_chr4 | Cufflinks | exon | 23397911 | 23397958 | . | + | . | gene_id | "XLOC_180799"; | transcript_id | "Novel_002538"; | exon_number | "5";  | gene_type |  |
| Dt_chr4 | Cufflinks | exon | 23398786 | 23398933 | . | + | . | gene_id | "XLOC_180799"; | transcript_id | "Novel_002538"; | exon_number | "6";  | gene_type |  |
| Dt_chr4 | Cufflinks | exon | 26678493 | 26679374 | . | + | . | gene_id | "XLOC_180952"; | transcript_id | "Novel_002539"; | exon_number | "1";  | gene_type |  |
| Dt_chr4 | Cufflinks | exon | 26679788 | 26679949 | . | + | . | gene_id | "XLOC_180952"; | transcript_id | "Novel_002539"; | exon_number | "2";  | gene_type |  |
| Dt_chr4 | Cufflinks | exon | 26680267 | 26680350 | . | + | . | gene_id | "XLOC_180952"; | transcript_id | "Novel_002539"; | exon_number | "3";  | gene_type |  |
| Dt_chr4 | Cufflinks | exon | 26719047 | 26719388 | . | + | . | gene_id | "XLOC_180952"; | transcript_id | "Novel_002539"; | exon_number | "4";  | gene_type |  |
| Dt_chr4 | Cufflinks | exon | 26716935 | 26717037 | . | + | . | gene_id | "XLOC_180952"; | transcript_id | "Novel_002540"; | exon_number | "1";  | gene_type |  |
| Dt_chr4 | Cufflinks | exon | 26717335 | 26717532 | . | + | . | gene_id | "XLOC_180952"; | transcript_id | "Novel_002540"; | exon_number | "2";  | gene_type |  |
| Dt_chr4 | Cufflinks | exon | 26717683 | 26717994 | . | + | . | gene_id | "XLOC_180952"; | transcript_id | "Novel_002540"; | exon_number | "3";  | gene_type |  |
| Dt_chr4 | Cufflinks | exon | 26718400 | 26718561 | . | + | . | gene_id | "XLOC_180952"; | transcript_id | "Novel_002540"; | exon_number | "4";  | gene_type |  |
| Dt_chr4 | Cufflinks | exon | 26718880 | 26718963 | . | + | . | gene_id | "XLOC_180952"; | transcript_id | "Novel_002540"; | exon_number | "5";  | gene_type |  |
| Dt_chr4 | Cufflinks | exon | 26719047 | 26719403 | . | + | . | gene_id | "XLOC_180952"; | transcript_id | "Novel_002540"; | exon_number | "6";  | gene_type |  |
| Dt_chr4 | Cufflinks | exon | 26716961 | 26717994 | . | + | . | gene_id | "XLOC_180952"; | transcript_id | "Novel_002541"; | exon_number | "1";  | gene_type |  |

|         |           |      |          |          |   |   |   |         |                |               |                 |             |      |           |   |
|---------|-----------|------|----------|----------|---|---|---|---------|----------------|---------------|-----------------|-------------|------|-----------|---|
| Dt_chr4 | Cufflinks | exon | 26718400 | 26718561 | . | + | . | gene_id | "XLOC_180952"; | transcript_id | "Novel_002541"; | exon_number | "2"; | gene_type | " |
| Dt_chr4 | Cufflinks | exon | 26718880 | 26719403 | . | + | . | gene_id | "XLOC_180952"; | transcript_id | "Novel_002541"; | exon_number | "3"; | gene_type | " |
| Dt_chr4 | Cufflinks | exon | 26834520 | 26835921 | . | + | . | gene_id | "XLOC_180960"; | transcript_id | "Novel_002542"; | exon_number | "1"; | gene_type | " |
| Dt_chr4 | Cufflinks | exon | 27190426 | 27190629 | . | + | . | gene_id | "XLOC_180987"; | transcript_id | "Novel_002543"; | exon_number | "1"; | gene_type | " |
| Dt_chr4 | Cufflinks | exon | 27313589 | 27314783 | . | + | . | gene_id | "XLOC_180998"; | transcript_id | "Novel_002544"; | exon_number | "1"; | gene_type | " |
| Dt_chr4 | Cufflinks | exon | 27316723 | 27317594 | . | + | . | gene_id | "XLOC_180998"; | transcript_id | "Novel_002544"; | exon_number | "2"; | gene_type | " |
| Dt_chr4 | Cufflinks | exon | 27328269 | 27330171 | . | + | . | gene_id | "XLOC_181002"; | transcript_id | "Novel_002545"; | exon_number | "1"; | gene_type | " |
| Dt_chr4 | Cufflinks | exon | 27506500 | 27506761 | . | + | . | gene_id | "XLOC_181036"; | transcript_id | "Novel_002546"; | exon_number | "1"; | gene_type | " |
| Dt_chr4 | Cufflinks | exon | 27506878 | 27508847 | . | + | . | gene_id | "XLOC_181036"; | transcript_id | "Novel_002546"; | exon_number | "2"; | gene_type | " |
| Dt_chr4 | Cufflinks | exon | 27508953 | 27509885 | . | + | . | gene_id | "XLOC_181036"; | transcript_id | "Novel_002546"; | exon_number | "3"; | gene_type | " |
| Dt_chr4 | Cufflinks | exon | 27738093 | 27738218 | . | + | . | gene_id | "XLOC_181056"; | transcript_id | "Novel_002547"; | exon_number | "1"; | gene_type | " |
| Dt_chr4 | Cufflinks | exon | 27738354 | 27738503 | . | + | . | gene_id | "XLOC_181056"; | transcript_id | "Novel_002547"; | exon_number | "2"; | gene_type | " |
| Dt_chr4 | Cufflinks | exon | 27738622 | 27738711 | . | + | . | gene_id | "XLOC_181056"; | transcript_id | "Novel_002547"; | exon_number | "3"; | gene_type | " |
| Dt_chr4 | Cufflinks | exon | 27739348 | 27739610 | . | + | . | gene_id | "XLOC_181056"; | transcript_id | "Novel_002547"; | exon_number | "4"; | gene_type | " |
| Dt_chr4 | Cufflinks | exon | 27848992 | 27849702 | . | + | . | gene_id | "XLOC_181067"; | transcript_id | "Novel_002548"; | exon_number | "1"; | gene_type | " |
| Dt_chr4 | Cufflinks | exon | 27849800 | 27849950 | . | + | . | gene_id | "XLOC_181067"; | transcript_id | "Novel_002548"; | exon_number | "2"; | gene_type | " |
| Dt_chr4 | Cufflinks | exon | 27849017 | 27849718 | . | + | . | gene_id | "XLOC_181067"; | transcript_id | "Novel_002549"; | exon_number | "1"; | gene_type | " |
| Dt_chr4 | Cufflinks | exon | 27849800 | 27849921 | . | + | . | gene_id | "XLOC_181067"; | transcript_id | "Novel_002549"; | exon_number | "2"; | gene_type | " |
| Dt_chr4 | Cufflinks | exon | 31429827 | 31429931 | . | + | . | gene_id | "XLOC_181467"; | transcript_id | "Novel_002550"; | exon_number | "1"; | gene_type | " |
| Dt_chr4 | Cufflinks | exon | 31431246 | 31431910 | . | + | . | gene_id | "XLOC_181467"; | transcript_id | "Novel_002550"; | exon_number | "2"; | gene_type | " |
| Dt_chr4 | Cufflinks | exon | 34994029 | 34994078 | . | + | . | gene_id | "XLOC_181675"; | transcript_id | "Novel_002551"; | exon_number | "1"; | gene_type | " |
| Dt_chr4 | Cufflinks | exon | 34994270 | 34994365 | . | + | . | gene_id | "XLOC_181675"; | transcript_id | "Novel_002551"; | exon_number | "2"; | gene_type | " |
| Dt_chr4 | Cufflinks | exon | 34994488 | 34994565 | . | + | . | gene_id | "XLOC_181675"; | transcript_id | "Novel_002551"; | exon_number | "3"; | gene_type | " |
| Dt_chr4 | Cufflinks | exon | 34994660 | 34994836 | . | + | . | gene_id | "XLOC_181675"; | transcript_id | "Novel_002551"; | exon_number | "4"; | gene_type | " |
| Dt_chr4 | Cufflinks | exon | 34995715 | 34995783 | . | + | . | gene_id | "XLOC_181675"; | transcript_id | "Novel_002551"; | exon_number | "5"; | gene_type | " |
| Dt_chr4 | Cufflinks | exon | 34995875 | 34996639 | . | + | . | gene_id | "XLOC_181675"; | transcript_id | "Novel_002551"; | exon_number | "6"; | gene_type | " |
| Dt_chr4 | Cufflinks | exon | 2270302  | 2270577  | . | - | . | gene_id | "XLOC_181842"; | transcript_id | "Novel_002552"; | exon_number | "1"; | gene_type | " |
| Dt_chr4 | Cufflinks | exon | 2271534  | 2271615  | . | - | . | gene_id | "XLOC_181842"; | transcript_id | "Novel_002552"; | exon_number | "2"; | gene_type | " |
| Dt_chr4 | Cufflinks | exon | 2271716  | 2271804  | . | - | . | gene_id | "XLOC_181842"; | transcript_id | "Novel_002552"; | exon_number | "3"; | gene_type | " |
| Dt_chr4 | Cufflinks | exon | 2273998  | 2274109  | . | - | . | gene_id | "XLOC_181842"; | transcript_id | "Novel_002552"; | exon_number | "4"; | gene_type | " |
| Dt_chr4 | Cufflinks | exon | 2270302  | 2270577  | . | - | . | gene_id | "XLOC_181842"; | transcript_id | "Novel_002553"; | exon_number | "1"; | gene_type | " |
| Dt_chr4 | Cufflinks | exon | 2271534  | 2271627  | . | - | . | gene_id | "XLOC_181842"; | transcript_id | "Novel_002553"; | exon_number | "2"; | gene_type | " |
| Dt_chr4 | Cufflinks | exon | 2271716  | 2271804  | . | - | . | gene_id | "XLOC_181842"; | transcript_id | "Novel_002553"; | exon_number | "3"; | gene_type | " |
| Dt_chr4 | Cufflinks | exon | 2273998  | 2274109  | . | - | . | gene_id | "XLOC_181842"; | transcript_id | "Novel_002553"; | exon_number | "4"; | gene_type | " |
| Dt_chr4 | Cufflinks | exon | 6144844  | 6145080  | . | - | . | gene_id | "XLOC_182078"; | transcript_id | "Novel_002554"; | exon_number | "1"; | gene_type | " |

|         |           |      |          |          |   |   |         |                              |                             |                |   |
|---------|-----------|------|----------|----------|---|---|---------|------------------------------|-----------------------------|----------------|---|
| Dt_chr4 | Cufflinks | exon | 6260674  | 6260958  | . | . | gene_id | "XLOC_182090"; transcript_id | "Novel_002555"; exon_number | "1"; gene_type | " |
| Dt_chr4 | Cufflinks | exon | 6538887  | 6540239  | . | . | gene_id | "XLOC_182113"; transcript_id | "Novel_002556"; exon_number | "1"; gene_type | " |
| Dt_chr4 | Cufflinks | exon | 6554933  | 6555428  | . | . | gene_id | "XLOC_182116"; transcript_id | "Novel_002557"; exon_number | "1"; gene_type | " |
| Dt_chr4 | Cufflinks | exon | 6555799  | 6555879  | . | . | gene_id | "XLOC_182116"; transcript_id | "Novel_002557"; exon_number | "2"; gene_type | " |
| Dt_chr4 | Cufflinks | exon | 6556780  | 6557025  | . | . | gene_id | "XLOC_182116"; transcript_id | "Novel_002557"; exon_number | "3"; gene_type | " |
| Dt_chr4 | Cufflinks | exon | 14805526 | 14805559 | . | . | gene_id | "XLOC_182523"; transcript_id | "Novel_002558"; exon_number | "1"; gene_type | " |
| Dt_chr4 | Cufflinks | exon | 14807498 | 14807623 | . | . | gene_id | "XLOC_182523"; transcript_id | "Novel_002558"; exon_number | "2"; gene_type | " |
| Dt_chr4 | Cufflinks | exon | 14808041 | 14808567 | . | . | gene_id | "XLOC_182523"; transcript_id | "Novel_002558"; exon_number | "3"; gene_type | " |
| Dt_chr4 | Cufflinks | exon | 14806903 | 14807623 | . | . | gene_id | "XLOC_182523"; transcript_id | "Novel_002559"; exon_number | "1"; gene_type | " |
| Dt_chr4 | Cufflinks | exon | 14808041 | 14808518 | . | . | gene_id | "XLOC_182523"; transcript_id | "Novel_002559"; exon_number | "2"; gene_type | " |
| Dt_chr4 | Cufflinks | exon | 20809178 | 20812259 | . | . | gene_id | "XLOC_182848"; transcript_id | "Novel_002560"; exon_number | "1"; gene_type | " |
| Dt_chr4 | Cufflinks | exon | 20819486 | 20819659 | . | . | gene_id | "XLOC_182848"; transcript_id | "Novel_002560"; exon_number | "2"; gene_type | " |
| Dt_chr4 | Cufflinks | exon | 20819864 | 20819941 | . | . | gene_id | "XLOC_182848"; transcript_id | "Novel_002560"; exon_number | "3"; gene_type | " |
| Dt_chr4 | Cufflinks | exon | 20821096 | 20821215 | . | . | gene_id | "XLOC_182848"; transcript_id | "Novel_002560"; exon_number | "4"; gene_type | " |
| Dt_chr4 | Cufflinks | exon | 20821324 | 20821724 | . | . | gene_id | "XLOC_182848"; transcript_id | "Novel_002560"; exon_number | "5"; gene_type | " |
| Dt_chr4 | Cufflinks | exon | 20822433 | 20822517 | . | . | gene_id | "XLOC_182848"; transcript_id | "Novel_002560"; exon_number | "6"; gene_type | " |
| Dt_chr4 | Cufflinks | exon | 20817935 | 20819659 | . | . | gene_id | "XLOC_182848"; transcript_id | "Novel_002561"; exon_number | "1"; gene_type | " |
| Dt_chr4 | Cufflinks | exon | 20819864 | 20819941 | . | . | gene_id | "XLOC_182848"; transcript_id | "Novel_002561"; exon_number | "2"; gene_type | " |
| Dt_chr4 | Cufflinks | exon | 20821096 | 20821215 | . | . | gene_id | "XLOC_182848"; transcript_id | "Novel_002561"; exon_number | "3"; gene_type | " |
| Dt_chr4 | Cufflinks | exon | 20821324 | 20822506 | . | . | gene_id | "XLOC_182848"; transcript_id | "Novel_002561"; exon_number | "4"; gene_type | " |
| Dt_chr4 | Cufflinks | exon | 20878653 | 20878897 | . | . | gene_id | "XLOC_182859"; transcript_id | "Novel_002562"; exon_number | "1"; gene_type | " |
| Dt_chr4 | Cufflinks | exon | 20878988 | 20879107 | . | . | gene_id | "XLOC_182859"; transcript_id | "Novel_002562"; exon_number | "2"; gene_type | " |
| Dt_chr4 | Cufflinks | exon | 20880013 | 20880106 | . | . | gene_id | "XLOC_182859"; transcript_id | "Novel_002562"; exon_number | "3"; gene_type | " |
| Dt_chr4 | Cufflinks | exon | 20880570 | 20881022 | . | . | gene_id | "XLOC_182859"; transcript_id | "Novel_002562"; exon_number | "4"; gene_type | " |
| Dt_chr4 | Cufflinks | exon | 23190819 | 23193888 | . | . | gene_id | "XLOC_183065"; transcript_id | "Novel_002563"; exon_number | "1"; gene_type | " |
| Dt_chr4 | Cufflinks | exon | 23193980 | 23194413 | . | . | gene_id | "XLOC_183065"; transcript_id | "Novel_002563"; exon_number | "2"; gene_type | " |
| Dt_chr4 | Cufflinks | exon | 23190820 | 23191360 | . | . | gene_id | "XLOC_183065"; transcript_id | "Novel_002564"; exon_number | "1"; gene_type | " |
| Dt_chr4 | Cufflinks | exon | 23193840 | 23193888 | . | . | gene_id | "XLOC_183065"; transcript_id | "Novel_002564"; exon_number | "2"; gene_type | " |
| Dt_chr4 | Cufflinks | exon | 23193980 | 23194411 | . | . | gene_id | "XLOC_183065"; transcript_id | "Novel_002564"; exon_number | "3"; gene_type | " |
| Dt_chr4 | Cufflinks | exon | 26359417 | 26359627 | . | . | gene_id | "XLOC_183251"; transcript_id | "Novel_002565"; exon_number | "1"; gene_type | " |
| Dt_chr4 | Cufflinks | exon | 26464532 | 26466164 | . | . | gene_id | "XLOC_183258"; transcript_id | "Novel_002566"; exon_number | "1"; gene_type | " |
| Dt_chr4 | Cufflinks | exon | 26466292 | 26467255 | . | . | gene_id | "XLOC_183258"; transcript_id | "Novel_002566"; exon_number | "2"; gene_type | " |
| Dt_chr4 | Cufflinks | exon | 26468335 | 26468700 | . | . | gene_id | "XLOC_183258"; transcript_id | "Novel_002567"; exon_number | "1"; gene_type | " |
| Dt_chr4 | Cufflinks | exon | 26468799 | 26468904 | . | . | gene_id | "XLOC_183258"; transcript_id | "Novel_002567"; exon_number | "2"; gene_type | " |
| Dt_chr4 | Cufflinks | exon | 26469638 | 26469692 | . | . | gene_id | "XLOC_183258"; transcript_id | "Novel_002567"; exon_number | "3"; gene_type | " |



|         |           |      |          |          |   |   |   |         |                |               |                 |             |      |           |   |
|---------|-----------|------|----------|----------|---|---|---|---------|----------------|---------------|-----------------|-------------|------|-----------|---|
| Dt_chr4 | Cufflinks | exon | 26470703 | 26471030 | . | - | . | gene_id | "XLOC_183258"; | transcript_id | "Novel_002567"; | exon_number | "4"; | gene_type | " |
| Dt_chr4 | Cufflinks | exon | 26468335 | 26468700 | . | - | . | gene_id | "XLOC_183258"; | transcript_id | "Novel_002568"; | exon_number | "1"; | gene_type | " |
| Dt_chr4 | Cufflinks | exon | 26468799 | 26468904 | . | - | . | gene_id | "XLOC_183258"; | transcript_id | "Novel_002568"; | exon_number | "2"; | gene_type | " |
| Dt_chr4 | Cufflinks | exon | 26470703 | 26471030 | . | - | . | gene_id | "XLOC_183258"; | transcript_id | "Novel_002568"; | exon_number | "3"; | gene_type | " |
| Dt_chr4 | Cufflinks | exon | 26468372 | 26468700 | . | - | . | gene_id | "XLOC_183258"; | transcript_id | "Novel_002569"; | exon_number | "1"; | gene_type | " |
| Dt_chr4 | Cufflinks | exon | 26468799 | 26468904 | . | - | . | gene_id | "XLOC_183258"; | transcript_id | "Novel_002569"; | exon_number | "2"; | gene_type | " |
| Dt_chr4 | Cufflinks | exon | 26469512 | 26469543 | . | - | . | gene_id | "XLOC_183258"; | transcript_id | "Novel_002569"; | exon_number | "3"; | gene_type | " |
| Dt_chr4 | Cufflinks | exon | 26469638 | 26469692 | . | - | . | gene_id | "XLOC_183258"; | transcript_id | "Novel_002569"; | exon_number | "4"; | gene_type | " |
| Dt_chr4 | Cufflinks | exon | 26470703 | 26470993 | . | - | . | gene_id | "XLOC_183258"; | transcript_id | "Novel_002569"; | exon_number | "5"; | gene_type | " |
| Dt_chr4 | Cufflinks | exon | 26468395 | 26468700 | . | - | . | gene_id | "XLOC_183258"; | transcript_id | "Novel_002570"; | exon_number | "1"; | gene_type | " |
| Dt_chr4 | Cufflinks | exon | 26468799 | 26469627 | . | - | . | gene_id | "XLOC_183258"; | transcript_id | "Novel_002570"; | exon_number | "2"; | gene_type | " |
| Dt_chr4 | Cufflinks | exon | 27312879 | 27313097 | . | - | . | gene_id | "XLOC_183323"; | transcript_id | "Novel_002571"; | exon_number | "1"; | gene_type | " |
| Dt_chr4 | Cufflinks | exon | 27313345 | 27313435 | . | - | . | gene_id | "XLOC_183323"; | transcript_id | "Novel_002571"; | exon_number | "2"; | gene_type | " |
| Dt_chr4 | Cufflinks | exon | 27313548 | 27314799 | . | - | . | gene_id | "XLOC_183323"; | transcript_id | "Novel_002571"; | exon_number | "3"; | gene_type | " |
| Dt_chr4 | Cufflinks | exon | 27313081 | 27313435 | . | - | . | gene_id | "XLOC_183323"; | transcript_id | "Novel_002572"; | exon_number | "1"; | gene_type | " |
| Dt_chr4 | Cufflinks | exon | 27313548 | 27314865 | . | - | . | gene_id | "XLOC_183323"; | transcript_id | "Novel_002572"; | exon_number | "2"; | gene_type | " |
| Dt_chr4 | Cufflinks | exon | 27549157 | 27549659 | . | - | . | gene_id | "XLOC_183358"; | transcript_id | "Novel_002573"; | exon_number | "1"; | gene_type | " |
| Dt_chr4 | Cufflinks | exon | 27550121 | 27550163 | . | - | . | gene_id | "XLOC_183358"; | transcript_id | "Novel_002573"; | exon_number | "2"; | gene_type | " |
| Dt_chr4 | Cufflinks | exon | 27550519 | 27550610 | . | - | . | gene_id | "XLOC_183359"; | transcript_id | "Novel_002574"; | exon_number | "1"; | gene_type | " |
| Dt_chr4 | Cufflinks | exon | 27550841 | 27550970 | . | - | . | gene_id | "XLOC_183359"; | transcript_id | "Novel_002574"; | exon_number | "2"; | gene_type | " |
| Dt_chr4 | Cufflinks | exon | 27551143 | 27552149 | . | - | . | gene_id | "XLOC_183359"; | transcript_id | "Novel_002574"; | exon_number | "3"; | gene_type | " |
| Dt_chr4 | Cufflinks | exon | 27550554 | 27550610 | . | - | . | gene_id | "XLOC_183359"; | transcript_id | "Novel_002575"; | exon_number | "1"; | gene_type | " |
| Dt_chr4 | Cufflinks | exon | 27550841 | 27550970 | . | - | . | gene_id | "XLOC_183359"; | transcript_id | "Novel_002575"; | exon_number | "2"; | gene_type | " |
| Dt_chr4 | Cufflinks | exon | 27551143 | 27551372 | . | - | . | gene_id | "XLOC_183359"; | transcript_id | "Novel_002575"; | exon_number | "3"; | gene_type | " |
| Dt_chr4 | Cufflinks | exon | 27551451 | 27552303 | . | - | . | gene_id | "XLOC_183359"; | transcript_id | "Novel_002575"; | exon_number | "4"; | gene_type | " |
| Dt_chr4 | Cufflinks | exon | 27550860 | 27550970 | . | - | . | gene_id | "XLOC_183359"; | transcript_id | "Novel_002576"; | exon_number | "1"; | gene_type | " |
| Dt_chr4 | Cufflinks | exon | 27551143 | 27551191 | . | - | . | gene_id | "XLOC_183359"; | transcript_id | "Novel_002576"; | exon_number | "2"; | gene_type | " |
| Dt_chr4 | Cufflinks | exon | 27551451 | 27551507 | . | - | . | gene_id | "XLOC_183359"; | transcript_id | "Novel_002576"; | exon_number | "3"; | gene_type | " |
| Dt_chr4 | Cufflinks | exon | 27552475 | 27552754 | . | - | . | gene_id | "XLOC_183359"; | transcript_id | "Novel_002576"; | exon_number | "4"; | gene_type | " |
| Dt_chr4 | Cufflinks | exon | 29887744 | 29887816 | . | - | . | gene_id | "XLOC_183579"; | transcript_id | "Novel_002577"; | exon_number | "1"; | gene_type | " |
| Dt_chr4 | Cufflinks | exon | 29887919 | 29888030 | . | - | . | gene_id | "XLOC_183579"; | transcript_id | "Novel_002577"; | exon_number | "2"; | gene_type | " |
| Dt_chr4 | Cufflinks | exon | 29888116 | 29888367 | . | - | . | gene_id | "XLOC_183579"; | transcript_id | "Novel_002577"; | exon_number | "3"; | gene_type | " |
| Dt_chr4 | Cufflinks | exon | 29888468 | 29888569 | . | - | . | gene_id | "XLOC_183579"; | transcript_id | "Novel_002577"; | exon_number | "4"; | gene_type | " |
| Dt_chr4 | Cufflinks | exon | 29888649 | 29888766 | . | - | . | gene_id | "XLOC_183579"; | transcript_id | "Novel_002577"; | exon_number | "5"; | gene_type | " |
| Dt_chr4 | Cufflinks | exon | 29888913 | 29889051 | . | - | . | gene_id | "XLOC_183579"; | transcript_id | "Novel_002577"; | exon_number | "6"; | gene_type | " |

|         |           |      |          |          |   |   |   |         |                |               |                 |             |       |           |   |
|---------|-----------|------|----------|----------|---|---|---|---------|----------------|---------------|-----------------|-------------|-------|-----------|---|
| Dt_chr4 | Cufflinks | exon | 29889288 | 29889475 | . | - | . | gene_id | "XLOC_183579"; | transcript_id | "Novel_002577"; | exon_number | "7";  | gene_type | " |
| Dt_chr4 | Cufflinks | exon | 29889559 | 29889669 | . | - | . | gene_id | "XLOC_183579"; | transcript_id | "Novel_002577"; | exon_number | "8";  | gene_type | " |
| Dt_chr4 | Cufflinks | exon | 29889812 | 29889874 | . | - | . | gene_id | "XLOC_183579"; | transcript_id | "Novel_002577"; | exon_number | "9";  | gene_type | " |
| Dt_chr4 | Cufflinks | exon | 29890473 | 29890572 | . | - | . | gene_id | "XLOC_183579"; | transcript_id | "Novel_002577"; | exon_number | "10"; | gene_type | " |
| Dt_chr4 | Cufflinks | exon | 29890816 | 29891351 | . | - | . | gene_id | "XLOC_183579"; | transcript_id | "Novel_002577"; | exon_number | "11"; | gene_type | " |
| Dt_chr4 | Cufflinks | exon | 29891767 | 29892077 | . | - | . | gene_id | "XLOC_183579"; | transcript_id | "Novel_002577"; | exon_number | "12"; | gene_type | " |
| Dt_chr4 | Cufflinks | exon | 29891553 | 29891625 | . | - | . | gene_id | "XLOC_183579"; | transcript_id | "Novel_002578"; | exon_number | "1";  | gene_type | " |
| Dt_chr4 | Cufflinks | exon | 29891767 | 29892070 | . | - | . | gene_id | "XLOC_183579"; | transcript_id | "Novel_002578"; | exon_number | "2";  | gene_type | " |
| Dt_chr4 | Cufflinks | exon | 30683722 | 30684191 | . | - | . | gene_id | "XLOC_183682"; | transcript_id | "Novel_002579"; | exon_number | "1";  | gene_type | " |
| Dt_chr4 | Cufflinks | exon | 30684577 | 30684763 | . | - | . | gene_id | "XLOC_183682"; | transcript_id | "Novel_002579"; | exon_number | "2";  | gene_type | " |
| Dt_chr4 | Cufflinks | exon | 30684880 | 30685006 | . | - | . | gene_id | "XLOC_183682"; | transcript_id | "Novel_002579"; | exon_number | "3";  | gene_type | " |
| Dt_chr4 | Cufflinks | exon | 30685423 | 30686243 | . | - | . | gene_id | "XLOC_183682"; | transcript_id | "Novel_002579"; | exon_number | "4";  | gene_type | " |
| Dt_chr4 | Cufflinks | exon | 34203182 | 34204926 | . | - | . | gene_id | "XLOC_183937"; | transcript_id | "Novel_002580"; | exon_number | "1";  | gene_type | " |
| Dt_chr4 | Cufflinks | exon | 34205951 | 34207669 | . | - | . | gene_id | "XLOC_183937"; | transcript_id | "Novel_002580"; | exon_number | "2";  | gene_type | " |
| Dt_chr5 | Cufflinks | exon | 864084   | 864135   | . | + | . | gene_id | "XLOC_184163"; | transcript_id | "Novel_002581"; | exon_number | "1";  | gene_type | " |
| Dt_chr5 | Cufflinks | exon | 864215   | 864278   | . | + | . | gene_id | "XLOC_184163"; | transcript_id | "Novel_002581"; | exon_number | "2";  | gene_type | " |
| Dt_chr5 | Cufflinks | exon | 864887   | 865170   | . | + | . | gene_id | "XLOC_184163"; | transcript_id | "Novel_002581"; | exon_number | "3";  | gene_type | " |
| Dt_chr5 | Cufflinks | exon | 1454553  | 1455235  | . | + | . | gene_id | "XLOC_184214"; | transcript_id | "Novel_002582"; | exon_number | "1";  | gene_type | " |
| Dt_chr5 | Cufflinks | exon | 1455637  | 1455930  | . | + | . | gene_id | "XLOC_184214"; | transcript_id | "Novel_002582"; | exon_number | "2";  | gene_type | " |
| Dt_chr5 | Cufflinks | exon | 1456327  | 1456381  | . | + | . | gene_id | "XLOC_184214"; | transcript_id | "Novel_002582"; | exon_number | "3";  | gene_type | " |
| Dt_chr5 | Cufflinks | exon | 1456641  | 1456713  | . | + | . | gene_id | "XLOC_184214"; | transcript_id | "Novel_002582"; | exon_number | "4";  | gene_type | " |
| Dt_chr5 | Cufflinks | exon | 1456958  | 1457293  | . | + | . | gene_id | "XLOC_184214"; | transcript_id | "Novel_002582"; | exon_number | "5";  | gene_type | " |
| Dt_chr5 | Cufflinks | exon | 6581481  | 6581708  | . | + | . | gene_id | "XLOC_184578"; | transcript_id | "Novel_002583"; | exon_number | "1";  | gene_type | " |
| Dt_chr5 | Cufflinks | exon | 6581787  | 6581867  | . | + | . | gene_id | "XLOC_184578"; | transcript_id | "Novel_002583"; | exon_number | "2";  | gene_type | " |
| Dt_chr5 | Cufflinks | exon | 6581950  | 6582853  | . | + | . | gene_id | "XLOC_184578"; | transcript_id | "Novel_002583"; | exon_number | "3";  | gene_type | " |
| Dt_chr5 | Cufflinks | exon | 6824656  | 6825023  | . | + | . | gene_id | "XLOC_184617"; | transcript_id | "Novel_002584"; | exon_number | "1";  | gene_type | " |
| Dt_chr5 | Cufflinks | exon | 7196614  | 7197266  | . | + | . | gene_id | "XLOC_184689"; | transcript_id | "Novel_002585"; | exon_number | "1";  | gene_type | " |
| Dt_chr5 | Cufflinks | exon | 10460543 | 10460810 | . | + | . | gene_id | "XLOC_185189"; | transcript_id | "Novel_002586"; | exon_number | "1";  | gene_type | " |
| Dt_chr5 | Cufflinks | exon | 10460894 | 10461061 | . | + | . | gene_id | "XLOC_185189"; | transcript_id | "Novel_002586"; | exon_number | "2";  | gene_type | " |
| Dt_chr5 | Cufflinks | exon | 10461143 | 10461441 | . | + | . | gene_id | "XLOC_185189"; | transcript_id | "Novel_002586"; | exon_number | "3";  | gene_type | " |
| Dt_chr5 | Cufflinks | exon | 10651642 | 10651848 | . | + | . | gene_id | "XLOC_185222"; | transcript_id | "Novel_002587"; | exon_number | "1";  | gene_type | " |
| Dt_chr5 | Cufflinks | exon | 10652053 | 10652086 | . | + | . | gene_id | "XLOC_185222"; | transcript_id | "Novel_002587"; | exon_number | "2";  | gene_type | " |
| Dt_chr5 | Cufflinks | exon | 10652204 | 10652265 | . | + | . | gene_id | "XLOC_185222"; | transcript_id | "Novel_002587"; | exon_number | "3";  | gene_type | " |
| Dt_chr5 | Cufflinks | exon | 10652976 | 10653028 | . | + | . | gene_id | "XLOC_185222"; | transcript_id | "Novel_002587"; | exon_number | "4";  | gene_type | " |
| Dt_chr5 | Cufflinks | exon | 10653415 | 10653722 | . | + | . | gene_id | "XLOC_185222"; | transcript_id | "Novel_002587"; | exon_number | "5";  | gene_type | " |

|         |           |      |          |          |   |   |   |         |                |               |                 |             |      |           |   |
|---------|-----------|------|----------|----------|---|---|---|---------|----------------|---------------|-----------------|-------------|------|-----------|---|
| Dt_chr5 | Cufflinks | exon | 11395419 | 11396369 | . | + | . | gene_id | "XLOC_185347"; | transcript_id | "Novel_002588"; | exon_number | "1"; | gene_type | " |
| Dt_chr5 | Cufflinks | exon | 11396538 | 11396616 | . | + | . | gene_id | "XLOC_185347"; | transcript_id | "Novel_002588"; | exon_number | "2"; | gene_type | " |
| Dt_chr5 | Cufflinks | exon | 11396774 | 11396942 | . | + | . | gene_id | "XLOC_185347"; | transcript_id | "Novel_002588"; | exon_number | "3"; | gene_type | " |
| Dt_chr5 | Cufflinks | exon | 11395609 | 11396369 | . | + | . | gene_id | "XLOC_185347"; | transcript_id | "Novel_002589"; | exon_number | "1"; | gene_type | " |
| Dt_chr5 | Cufflinks | exon | 11396538 | 11396616 | . | + | . | gene_id | "XLOC_185347"; | transcript_id | "Novel_002589"; | exon_number | "2"; | gene_type | " |
| Dt_chr5 | Cufflinks | exon | 11396774 | 11396833 | . | + | . | gene_id | "XLOC_185347"; | transcript_id | "Novel_002589"; | exon_number | "3"; | gene_type | " |
| Dt_chr5 | Cufflinks | exon | 11396930 | 11397051 | . | + | . | gene_id | "XLOC_185347"; | transcript_id | "Novel_002589"; | exon_number | "4"; | gene_type | " |
| Dt_chr5 | Cufflinks | exon | 11397148 | 11397219 | . | + | . | gene_id | "XLOC_185347"; | transcript_id | "Novel_002589"; | exon_number | "5"; | gene_type | " |
| Dt_chr5 | Cufflinks | exon | 11397318 | 11397967 | . | + | . | gene_id | "XLOC_185347"; | transcript_id | "Novel_002589"; | exon_number | "6"; | gene_type | " |
| Dt_chr5 | Cufflinks | exon | 11397041 | 11397219 | . | + | . | gene_id | "XLOC_185347"; | transcript_id | "Novel_002590"; | exon_number | "1"; | gene_type | " |
| Dt_chr5 | Cufflinks | exon | 11397318 | 11397457 | . | + | . | gene_id | "XLOC_185347"; | transcript_id | "Novel_002590"; | exon_number | "2"; | gene_type | " |
| Dt_chr5 | Cufflinks | exon | 11398013 | 11398417 | . | + | . | gene_id | "XLOC_185347"; | transcript_id | "Novel_002590"; | exon_number | "3"; | gene_type | " |
| Dt_chr5 | Cufflinks | exon | 12946632 | 12947293 | . | + | . | gene_id | "XLOC_185587"; | transcript_id | "Novel_002591"; | exon_number | "1"; | gene_type | " |
| Dt_chr5 | Cufflinks | exon | 12947386 | 12947456 | . | + | . | gene_id | "XLOC_185587"; | transcript_id | "Novel_002591"; | exon_number | "2"; | gene_type | " |
| Dt_chr5 | Cufflinks | exon | 12948284 | 12948365 | . | + | . | gene_id | "XLOC_185587"; | transcript_id | "Novel_002591"; | exon_number | "3"; | gene_type | " |
| Dt_chr5 | Cufflinks | exon | 12949785 | 12949846 | . | + | . | gene_id | "XLOC_185587"; | transcript_id | "Novel_002591"; | exon_number | "4"; | gene_type | " |
| Dt_chr5 | Cufflinks | exon | 12951008 | 12951872 | . | + | . | gene_id | "XLOC_185587"; | transcript_id | "Novel_002591"; | exon_number | "5"; | gene_type | " |
| Dt_chr5 | Cufflinks | exon | 12946769 | 12947090 | . | + | . | gene_id | "XLOC_185587"; | transcript_id | "Novel_002592"; | exon_number | "1"; | gene_type | " |
| Dt_chr5 | Cufflinks | exon | 12947163 | 12947293 | . | + | . | gene_id | "XLOC_185587"; | transcript_id | "Novel_002592"; | exon_number | "2"; | gene_type | " |
| Dt_chr5 | Cufflinks | exon | 12947386 | 12947456 | . | + | . | gene_id | "XLOC_185587"; | transcript_id | "Novel_002592"; | exon_number | "3"; | gene_type | " |
| Dt_chr5 | Cufflinks | exon | 12948284 | 12950340 | . | + | . | gene_id | "XLOC_185587"; | transcript_id | "Novel_002592"; | exon_number | "4"; | gene_type | " |
| Dt_chr5 | Cufflinks | exon | 15962609 | 15962871 | . | + | . | gene_id | "XLOC_185961"; | transcript_id | "Novel_002593"; | exon_number | "1"; | gene_type | " |
| Dt_chr5 | Cufflinks | exon | 15962949 | 15963136 | . | + | . | gene_id | "XLOC_185961"; | transcript_id | "Novel_002593"; | exon_number | "2"; | gene_type | " |
| Dt_chr5 | Cufflinks | exon | 15964317 | 15964476 | . | + | . | gene_id | "XLOC_185961"; | transcript_id | "Novel_002593"; | exon_number | "3"; | gene_type | " |
| Dt_chr5 | Cufflinks | exon | 15964552 | 15964713 | . | + | . | gene_id | "XLOC_185961"; | transcript_id | "Novel_002593"; | exon_number | "4"; | gene_type | " |
| Dt_chr5 | Cufflinks | exon | 15964811 | 15965116 | . | + | . | gene_id | "XLOC_185961"; | transcript_id | "Novel_002593"; | exon_number | "5"; | gene_type | " |
| Dt_chr5 | Cufflinks | exon | 15965187 | 15965812 | . | + | . | gene_id | "XLOC_185961"; | transcript_id | "Novel_002593"; | exon_number | "6"; | gene_type | " |
| Dt_chr5 | Cufflinks | exon | 15962731 | 15962871 | . | + | . | gene_id | "XLOC_185961"; | transcript_id | "Novel_002594"; | exon_number | "1"; | gene_type | " |
| Dt_chr5 | Cufflinks | exon | 15962949 | 15963597 | . | + | . | gene_id | "XLOC_185961"; | transcript_id | "Novel_002594"; | exon_number | "2"; | gene_type | " |
| Dt_chr5 | Cufflinks | exon | 16141340 | 16141922 | . | + | . | gene_id | "XLOC_185982"; | transcript_id | "Novel_002595"; | exon_number | "1"; | gene_type | " |
| Dt_chr5 | Cufflinks | exon | 16142137 | 16142299 | . | + | . | gene_id | "XLOC_185982"; | transcript_id | "Novel_002595"; | exon_number | "2"; | gene_type | " |
| Dt_chr5 | Cufflinks | exon | 16142420 | 16142566 | . | + | . | gene_id | "XLOC_185982"; | transcript_id | "Novel_002595"; | exon_number | "3"; | gene_type | " |
| Dt_chr5 | Cufflinks | exon | 16142686 | 16142748 | . | + | . | gene_id | "XLOC_185982"; | transcript_id | "Novel_002595"; | exon_number | "4"; | gene_type | " |
| Dt_chr5 | Cufflinks | exon | 16142830 | 16142906 | . | + | . | gene_id | "XLOC_185982"; | transcript_id | "Novel_002595"; | exon_number | "5"; | gene_type | " |
| Dt_chr5 | Cufflinks | exon | 16143165 | 16143270 | . | + | . | gene_id | "XLOC_185982"; | transcript_id | "Novel_002595"; | exon_number | "6"; | gene_type | " |

|         |           |      |          |          |   |   |   |         |                |               |                 |             |       |           |   |
|---------|-----------|------|----------|----------|---|---|---|---------|----------------|---------------|-----------------|-------------|-------|-----------|---|
| Dt_chr5 | Cufflinks | exon | 16143865 | 16143967 | . | + | . | gene_id | "XLOC_185982"; | transcript_id | "Novel_002595"; | exon_number | "7";  | gene_type | " |
| Dt_chr5 | Cufflinks | exon | 16144051 | 16144202 | . | + | . | gene_id | "XLOC_185982"; | transcript_id | "Novel_002595"; | exon_number | "8";  | gene_type | " |
| Dt_chr5 | Cufflinks | exon | 16144314 | 16144379 | . | + | . | gene_id | "XLOC_185982"; | transcript_id | "Novel_002595"; | exon_number | "9";  | gene_type | " |
| Dt_chr5 | Cufflinks | exon | 16144455 | 16145299 | . | + | . | gene_id | "XLOC_185982"; | transcript_id | "Novel_002595"; | exon_number | "10"; | gene_type | " |
| Dt_chr5 | Cufflinks | exon | 16611279 | 16612985 | . | + | . | gene_id | "XLOC_186066"; | transcript_id | "Novel_002596"; | exon_number | "1";  | gene_type | " |
| Dt_chr5 | Cufflinks | exon | 16613884 | 16615377 | . | + | . | gene_id | "XLOC_186066"; | transcript_id | "Novel_002596"; | exon_number | "2";  | gene_type | " |
| Dt_chr5 | Cufflinks | exon | 19131976 | 19132191 | . | + | . | gene_id | "XLOC_186468"; | transcript_id | "Novel_002597"; | exon_number | "1";  | gene_type | " |
| Dt_chr5 | Cufflinks | exon | 19132288 | 19132808 | . | + | . | gene_id | "XLOC_186468"; | transcript_id | "Novel_002597"; | exon_number | "2";  | gene_type | " |
| Dt_chr5 | Cufflinks | exon | 19715173 | 19718308 | . | + | . | gene_id | "XLOC_186505"; | transcript_id | "Novel_002598"; | exon_number | "1";  | gene_type | " |
| Dt_chr5 | Cufflinks | exon | 19718444 | 19720856 | . | + | . | gene_id | "XLOC_186505"; | transcript_id | "Novel_002598"; | exon_number | "2";  | gene_type | " |
| Dt_chr5 | Cufflinks | exon | 20195604 | 20200011 | . | + | . | gene_id | "XLOC_186587"; | transcript_id | "Novel_002599"; | exon_number | "1";  | gene_type | " |
| Dt_chr5 | Cufflinks | exon | 20200549 | 20200673 | . | + | . | gene_id | "XLOC_186587"; | transcript_id | "Novel_002599"; | exon_number | "2";  | gene_type | " |
| Dt_chr5 | Cufflinks | exon | 25166486 | 25168420 | . | + | . | gene_id | "XLOC_187076"; | transcript_id | "Novel_002600"; | exon_number | "1";  | gene_type | " |
| Dt_chr5 | Cufflinks | exon | 25168934 | 25170012 | . | + | . | gene_id | "XLOC_187076"; | transcript_id | "Novel_002600"; | exon_number | "2";  | gene_type | " |
| Dt_chr5 | Cufflinks | exon | 27265616 | 27265776 | . | + | . | gene_id | "XLOC_187264"; | transcript_id | "Novel_002601"; | exon_number | "1";  | gene_type | " |
| Dt_chr5 | Cufflinks | exon | 27266392 | 27266548 | . | + | . | gene_id | "XLOC_187264"; | transcript_id | "Novel_002601"; | exon_number | "2";  | gene_type | " |
| Dt_chr5 | Cufflinks | exon | 27266793 | 27266890 | . | + | . | gene_id | "XLOC_187264"; | transcript_id | "Novel_002601"; | exon_number | "3";  | gene_type | " |
| Dt_chr5 | Cufflinks | exon | 27702142 | 27702486 | . | + | . | gene_id | "XLOC_187291"; | transcript_id | "Novel_002602"; | exon_number | "1";  | gene_type | " |
| Dt_chr5 | Cufflinks | exon | 27703045 | 27703214 | . | + | . | gene_id | "XLOC_187291"; | transcript_id | "Novel_002602"; | exon_number | "2";  | gene_type | " |
| Dt_chr5 | Cufflinks | exon | 27703978 | 27704104 | . | + | . | gene_id | "XLOC_187291"; | transcript_id | "Novel_002602"; | exon_number | "3";  | gene_type | " |
| Dt_chr5 | Cufflinks | exon | 27705589 | 27705851 | . | + | . | gene_id | "XLOC_187291"; | transcript_id | "Novel_002602"; | exon_number | "4";  | gene_type | " |
| Dt_chr5 | Cufflinks | exon | 27706065 | 27707758 | . | + | . | gene_id | "XLOC_187291"; | transcript_id | "Novel_002602"; | exon_number | "5";  | gene_type | " |
| Dt_chr5 | Cufflinks | exon | 27702149 | 27702486 | . | + | . | gene_id | "XLOC_187291"; | transcript_id | "Novel_002603"; | exon_number | "1";  | gene_type | " |
| Dt_chr5 | Cufflinks | exon | 27703045 | 27703274 | . | + | . | gene_id | "XLOC_187291"; | transcript_id | "Novel_002603"; | exon_number | "2";  | gene_type | " |
| Dt_chr5 | Cufflinks | exon | 27704043 | 27704104 | . | + | . | gene_id | "XLOC_187291"; | transcript_id | "Novel_002604"; | exon_number | "1";  | gene_type | " |
| Dt_chr5 | Cufflinks | exon | 27705589 | 27707635 | . | + | . | gene_id | "XLOC_187291"; | transcript_id | "Novel_002604"; | exon_number | "2";  | gene_type | " |
| Dt_chr5 | Cufflinks | exon | 27709475 | 27709880 | . | + | . | gene_id | "XLOC_187291"; | transcript_id | "Novel_002605"; | exon_number | "1";  | gene_type | " |
| Dt_chr5 | Cufflinks | exon | 27710283 | 27710501 | . | + | . | gene_id | "XLOC_187291"; | transcript_id | "Novel_002605"; | exon_number | "2";  | gene_type | " |
| Dt_chr5 | Cufflinks | exon | 27710647 | 27710975 | . | + | . | gene_id | "XLOC_187291"; | transcript_id | "Novel_002605"; | exon_number | "3";  | gene_type | " |
| Dt_chr5 | Cufflinks | exon | 27711111 | 27711268 | . | + | . | gene_id | "XLOC_187291"; | transcript_id | "Novel_002605"; | exon_number | "4";  | gene_type | " |
| Dt_chr5 | Cufflinks | exon | 27709960 | 27710501 | . | + | . | gene_id | "XLOC_187291"; | transcript_id | "Novel_002606"; | exon_number | "1";  | gene_type | " |
| Dt_chr5 | Cufflinks | exon | 27710647 | 27710975 | . | + | . | gene_id | "XLOC_187291"; | transcript_id | "Novel_002606"; | exon_number | "2";  | gene_type | " |
| Dt_chr5 | Cufflinks | exon | 27711111 | 27711309 | . | + | . | gene_id | "XLOC_187291"; | transcript_id | "Novel_002606"; | exon_number | "3";  | gene_type | " |
| Dt_chr5 | Cufflinks | exon | 28158020 | 28158062 | . | + | . | gene_id | "XLOC_187320"; | transcript_id | "Novel_002607"; | exon_number | "1";  | gene_type | " |
| Dt_chr5 | Cufflinks | exon | 28158187 | 28161799 | . | + | . | gene_id | "XLOC_187320"; | transcript_id | "Novel_002607"; | exon_number | "2";  | gene_type | " |

|         |           |      |          |          |   |   |   |         |                |               |                 |             |       |           |   |
|---------|-----------|------|----------|----------|---|---|---|---------|----------------|---------------|-----------------|-------------|-------|-----------|---|
| Dt_chr5 | Cufflinks | exon | 33976230 | 33976472 | . | + | . | gene_id | "XLOC_187665"; | transcript_id | "Novel_002608"; | exon_number | "1";  | gene_type | " |
| Dt_chr5 | Cufflinks | exon | 33976589 | 33976904 | . | + | . | gene_id | "XLOC_187665"; | transcript_id | "Novel_002608"; | exon_number | "2";  | gene_type | " |
| Dt_chr5 | Cufflinks | exon | 34686256 | 34686671 | . | + | . | gene_id | "XLOC_187733"; | transcript_id | "Novel_002609"; | exon_number | "1";  | gene_type | " |
| Dt_chr5 | Cufflinks | exon | 34686957 | 34687089 | . | + | . | gene_id | "XLOC_187733"; | transcript_id | "Novel_002609"; | exon_number | "2";  | gene_type | " |
| Dt_chr5 | Cufflinks | exon | 34687190 | 34687261 | . | + | . | gene_id | "XLOC_187733"; | transcript_id | "Novel_002609"; | exon_number | "3";  | gene_type | " |
| Dt_chr5 | Cufflinks | exon | 34687367 | 34687432 | . | + | . | gene_id | "XLOC_187733"; | transcript_id | "Novel_002609"; | exon_number | "4";  | gene_type | " |
| Dt_chr5 | Cufflinks | exon | 34687522 | 34687593 | . | + | . | gene_id | "XLOC_187733"; | transcript_id | "Novel_002609"; | exon_number | "5";  | gene_type | " |
| Dt_chr5 | Cufflinks | exon | 34687695 | 34687766 | . | + | . | gene_id | "XLOC_187733"; | transcript_id | "Novel_002609"; | exon_number | "6";  | gene_type | " |
| Dt_chr5 | Cufflinks | exon | 34688135 | 34688206 | . | + | . | gene_id | "XLOC_187733"; | transcript_id | "Novel_002609"; | exon_number | "7";  | gene_type | " |
| Dt_chr5 | Cufflinks | exon | 34688303 | 34688368 | . | + | . | gene_id | "XLOC_187733"; | transcript_id | "Novel_002609"; | exon_number | "8";  | gene_type | " |
| Dt_chr5 | Cufflinks | exon | 34688447 | 34688512 | . | + | . | gene_id | "XLOC_187733"; | transcript_id | "Novel_002609"; | exon_number | "9";  | gene_type | " |
| Dt_chr5 | Cufflinks | exon | 34688600 | 34688880 | . | + | . | gene_id | "XLOC_187733"; | transcript_id | "Novel_002609"; | exon_number | "10"; | gene_type | " |
| Dt_chr5 | Cufflinks | exon | 34689356 | 34689692 | . | + | . | gene_id | "XLOC_187733"; | transcript_id | "Novel_002609"; | exon_number | "11"; | gene_type | " |
| Dt_chr5 | Cufflinks | exon | 34686316 | 34686671 | . | + | . | gene_id | "XLOC_187733"; | transcript_id | "Novel_002610"; | exon_number | "1";  | gene_type | " |
| Dt_chr5 | Cufflinks | exon | 34686957 | 34687089 | . | + | . | gene_id | "XLOC_187733"; | transcript_id | "Novel_002610"; | exon_number | "2";  | gene_type | " |
| Dt_chr5 | Cufflinks | exon | 34687190 | 34687261 | . | + | . | gene_id | "XLOC_187733"; | transcript_id | "Novel_002610"; | exon_number | "3";  | gene_type | " |
| Dt_chr5 | Cufflinks | exon | 34687367 | 34687432 | . | + | . | gene_id | "XLOC_187733"; | transcript_id | "Novel_002610"; | exon_number | "4";  | gene_type | " |
| Dt_chr5 | Cufflinks | exon | 34687522 | 34687593 | . | + | . | gene_id | "XLOC_187733"; | transcript_id | "Novel_002610"; | exon_number | "5";  | gene_type | " |
| Dt_chr5 | Cufflinks | exon | 34687695 | 34687766 | . | + | . | gene_id | "XLOC_187733"; | transcript_id | "Novel_002610"; | exon_number | "6";  | gene_type | " |
| Dt_chr5 | Cufflinks | exon | 34688135 | 34688206 | . | + | . | gene_id | "XLOC_187733"; | transcript_id | "Novel_002610"; | exon_number | "7";  | gene_type | " |
| Dt_chr5 | Cufflinks | exon | 34688303 | 34688368 | . | + | . | gene_id | "XLOC_187733"; | transcript_id | "Novel_002610"; | exon_number | "8";  | gene_type | " |
| Dt_chr5 | Cufflinks | exon | 34688447 | 34688512 | . | + | . | gene_id | "XLOC_187733"; | transcript_id | "Novel_002610"; | exon_number | "9";  | gene_type | " |
| Dt_chr5 | Cufflinks | exon | 34688600 | 34688880 | . | + | . | gene_id | "XLOC_187733"; | transcript_id | "Novel_002610"; | exon_number | "10"; | gene_type | " |
| Dt_chr5 | Cufflinks | exon | 34689356 | 34689609 | . | + | . | gene_id | "XLOC_187733"; | transcript_id | "Novel_002610"; | exon_number | "11"; | gene_type | " |
| Dt_chr5 | Cufflinks | exon | 34689740 | 34690011 | . | + | . | gene_id | "XLOC_187733"; | transcript_id | "Novel_002610"; | exon_number | "12"; | gene_type | " |
| Dt_chr5 | Cufflinks | exon | 34690113 | 34690248 | . | + | . | gene_id | "XLOC_187733"; | transcript_id | "Novel_002610"; | exon_number | "13"; | gene_type | " |
| Dt_chr5 | Cufflinks | exon | 34690372 | 34690511 | . | + | . | gene_id | "XLOC_187733"; | transcript_id | "Novel_002610"; | exon_number | "14"; | gene_type | " |
| Dt_chr5 | Cufflinks | exon | 34690628 | 34690784 | . | + | . | gene_id | "XLOC_187733"; | transcript_id | "Novel_002610"; | exon_number | "15"; | gene_type | " |
| Dt_chr5 | Cufflinks | exon | 34690893 | 34691504 | . | + | . | gene_id | "XLOC_187733"; | transcript_id | "Novel_002610"; | exon_number | "16"; | gene_type | " |
| Dt_chr5 | Cufflinks | exon | 35693922 | 35693959 | . | + | . | gene_id | "XLOC_187843"; | transcript_id | "Novel_002611"; | exon_number | "1";  | gene_type | " |
| Dt_chr5 | Cufflinks | exon | 35698905 | 35699335 | . | + | . | gene_id | "XLOC_187843"; | transcript_id | "Novel_002611"; | exon_number | "2";  | gene_type | " |
| Dt_chr5 | Cufflinks | exon | 40536500 | 40537320 | . | + | . | gene_id | "XLOC_188174"; | transcript_id | "Novel_002612"; | exon_number | "1";  | gene_type | " |
| Dt_chr5 | Cufflinks | exon | 40538193 | 40538700 | . | + | . | gene_id | "XLOC_188174"; | transcript_id | "Novel_002612"; | exon_number | "2";  | gene_type | " |
| Dt_chr5 | Cufflinks | exon | 41498892 | 41499093 | . | + | . | gene_id | "XLOC_188283"; | transcript_id | "Novel_002613"; | exon_number | "1";  | gene_type | " |
| Dt_chr5 | Cufflinks | exon | 41499452 | 41499535 | . | + | . | gene_id | "XLOC_188283"; | transcript_id | "Novel_002613"; | exon_number | "2";  | gene_type | " |

|         |           |      |          |          |   |   |   |         |                |               |                 |             |       |           |   |
|---------|-----------|------|----------|----------|---|---|---|---------|----------------|---------------|-----------------|-------------|-------|-----------|---|
| Dt_chr5 | Cufflinks | exon | 41500368 | 41500433 | . | + | . | gene_id | "XLOC_188283"; | transcript_id | "Novel_002613"; | exon_number | "3";  | gene_type | " |
| Dt_chr5 | Cufflinks | exon | 41501679 | 41501812 | . | + | . | gene_id | "XLOC_188283"; | transcript_id | "Novel_002613"; | exon_number | "4";  | gene_type | " |
| Dt_chr5 | Cufflinks | exon | 41501952 | 41504672 | . | + | . | gene_id | "XLOC_188283"; | transcript_id | "Novel_002613"; | exon_number | "5";  | gene_type | " |
| Dt_chr5 | Cufflinks | exon | 41498930 | 41499093 | . | + | . | gene_id | "XLOC_188283"; | transcript_id | "Novel_002614"; | exon_number | "1";  | gene_type | " |
| Dt_chr5 | Cufflinks | exon | 41499452 | 41500433 | . | + | . | gene_id | "XLOC_188283"; | transcript_id | "Novel_002614"; | exon_number | "2";  | gene_type | " |
| Dt_chr5 | Cufflinks | exon | 41501679 | 41501812 | . | + | . | gene_id | "XLOC_188283"; | transcript_id | "Novel_002614"; | exon_number | "3";  | gene_type | " |
| Dt_chr5 | Cufflinks | exon | 41501952 | 41503543 | . | + | . | gene_id | "XLOC_188283"; | transcript_id | "Novel_002614"; | exon_number | "4";  | gene_type | " |
| Dt_chr5 | Cufflinks | exon | 41498933 | 41499093 | . | + | . | gene_id | "XLOC_188283"; | transcript_id | "Novel_002615"; | exon_number | "1";  | gene_type | " |
| Dt_chr5 | Cufflinks | exon | 41499452 | 41500675 | . | + | . | gene_id | "XLOC_188283"; | transcript_id | "Novel_002615"; | exon_number | "2";  | gene_type | " |
| Dt_chr5 | Cufflinks | exon | 44562594 | 44562912 | . | + | . | gene_id | "XLOC_188444"; | transcript_id | "Novel_002616"; | exon_number | "1";  | gene_type | " |
| Dt_chr5 | Cufflinks | exon | 44563702 | 44563849 | . | + | . | gene_id | "XLOC_188444"; | transcript_id | "Novel_002616"; | exon_number | "2";  | gene_type | " |
| Dt_chr5 | Cufflinks | exon | 44564433 | 44564545 | . | + | . | gene_id | "XLOC_188444"; | transcript_id | "Novel_002616"; | exon_number | "3";  | gene_type | " |
| Dt_chr5 | Cufflinks | exon | 44564890 | 44564966 | . | + | . | gene_id | "XLOC_188444"; | transcript_id | "Novel_002616"; | exon_number | "4";  | gene_type | " |
| Dt_chr5 | Cufflinks | exon | 44565171 | 44565250 | . | + | . | gene_id | "XLOC_188444"; | transcript_id | "Novel_002616"; | exon_number | "5";  | gene_type | " |
| Dt_chr5 | Cufflinks | exon | 44565744 | 44565804 | . | + | . | gene_id | "XLOC_188444"; | transcript_id | "Novel_002616"; | exon_number | "6";  | gene_type | " |
| Dt_chr5 | Cufflinks | exon | 44566558 | 44566625 | . | + | . | gene_id | "XLOC_188444"; | transcript_id | "Novel_002616"; | exon_number | "7";  | gene_type | " |
| Dt_chr5 | Cufflinks | exon | 44566746 | 44566827 | . | + | . | gene_id | "XLOC_188444"; | transcript_id | "Novel_002616"; | exon_number | "8";  | gene_type | " |
| Dt_chr5 | Cufflinks | exon | 44567402 | 44567488 | . | + | . | gene_id | "XLOC_188444"; | transcript_id | "Novel_002616"; | exon_number | "9";  | gene_type | " |
| Dt_chr5 | Cufflinks | exon | 44567565 | 44567642 | . | + | . | gene_id | "XLOC_188444"; | transcript_id | "Novel_002616"; | exon_number | "10"; | gene_type | " |
| Dt_chr5 | Cufflinks | exon | 44568027 | 44568146 | . | + | . | gene_id | "XLOC_188444"; | transcript_id | "Novel_002616"; | exon_number | "11"; | gene_type | " |
| Dt_chr5 | Cufflinks | exon | 44568910 | 44569199 | . | + | . | gene_id | "XLOC_188444"; | transcript_id | "Novel_002616"; | exon_number | "12"; | gene_type | " |
| Dt_chr5 | Cufflinks | exon | 47983110 | 47983810 | . | + | . | gene_id | "XLOC_188616"; | transcript_id | "Novel_002617"; | exon_number | "1";  | gene_type | " |
| Dt_chr5 | Cufflinks | exon | 47983901 | 47984038 | . | + | . | gene_id | "XLOC_188616"; | transcript_id | "Novel_002617"; | exon_number | "2";  | gene_type | " |
| Dt_chr5 | Cufflinks | exon | 49251854 | 49251921 | . | + | . | gene_id | "XLOC_188733"; | transcript_id | "Novel_002618"; | exon_number | "1";  | gene_type | " |
| Dt_chr5 | Cufflinks | exon | 49252394 | 49255863 | . | + | . | gene_id | "XLOC_188733"; | transcript_id | "Novel_002618"; | exon_number | "2";  | gene_type | " |
| Dt_chr5 | Cufflinks | exon | 49256007 | 49256072 | . | + | . | gene_id | "XLOC_188733"; | transcript_id | "Novel_002618"; | exon_number | "3";  | gene_type | " |
| Dt_chr5 | Cufflinks | exon | 49256192 | 49256290 | . | + | . | gene_id | "XLOC_188733"; | transcript_id | "Novel_002618"; | exon_number | "4";  | gene_type | " |
| Dt_chr5 | Cufflinks | exon | 49256400 | 49257962 | . | + | . | gene_id | "XLOC_188733"; | transcript_id | "Novel_002618"; | exon_number | "5";  | gene_type | " |
| Dt_chr5 | Cufflinks | exon | 49251856 | 49251921 | . | + | . | gene_id | "XLOC_188733"; | transcript_id | "Novel_002619"; | exon_number | "1";  | gene_type | " |
| Dt_chr5 | Cufflinks | exon | 49252394 | 49255863 | . | + | . | gene_id | "XLOC_188733"; | transcript_id | "Novel_002619"; | exon_number | "2";  | gene_type | " |
| Dt_chr5 | Cufflinks | exon | 49256007 | 49256072 | . | + | . | gene_id | "XLOC_188733"; | transcript_id | "Novel_002619"; | exon_number | "3";  | gene_type | " |
| Dt_chr5 | Cufflinks | exon | 49256192 | 49256290 | . | + | . | gene_id | "XLOC_188733"; | transcript_id | "Novel_002619"; | exon_number | "4";  | gene_type | " |
| Dt_chr5 | Cufflinks | exon | 49256400 | 49256511 | . | + | . | gene_id | "XLOC_188733"; | transcript_id | "Novel_002619"; | exon_number | "5";  | gene_type | " |
| Dt_chr5 | Cufflinks | exon | 49259362 | 49260157 | . | + | . | gene_id | "XLOC_188733"; | transcript_id | "Novel_002619"; | exon_number | "6";  | gene_type | " |
| Dt_chr5 | Cufflinks | exon | 49251929 | 49255863 | . | + | . | gene_id | "XLOC_188733"; | transcript_id | "Novel_002620"; | exon_number | "1";  | gene_type | " |

|         |           |      |          |          |   |   |   |         |                |               |                 |             |      |           |   |
|---------|-----------|------|----------|----------|---|---|---|---------|----------------|---------------|-----------------|-------------|------|-----------|---|
| Dt_chr5 | Cufflinks | exon | 49256007 | 49256072 | . | + | . | gene_id | "XLOC_188733"; | transcript_id | "Novel_002620"; | exon_number | "2"; | gene_type | " |
| Dt_chr5 | Cufflinks | exon | 49256192 | 49256290 | . | + | . | gene_id | "XLOC_188733"; | transcript_id | "Novel_002620"; | exon_number | "3"; | gene_type | " |
| Dt_chr5 | Cufflinks | exon | 49256400 | 49257962 | . | + | . | gene_id | "XLOC_188733"; | transcript_id | "Novel_002620"; | exon_number | "4"; | gene_type | " |
| Dt_chr5 | Cufflinks | exon | 49932967 | 49933104 | . | + | . | gene_id | "XLOC_188802"; | transcript_id | "Novel_002621"; | exon_number | "1"; | gene_type | " |
| Dt_chr5 | Cufflinks | exon | 49933632 | 49934928 | . | + | . | gene_id | "XLOC_188802"; | transcript_id | "Novel_002621"; | exon_number | "2"; | gene_type | " |
| Dt_chr5 | Cufflinks | exon | 51780199 | 51780305 | . | + | . | gene_id | "XLOC_189014"; | transcript_id | "Novel_002622"; | exon_number | "1"; | gene_type | " |
| Dt_chr5 | Cufflinks | exon | 51780468 | 51780841 | . | + | . | gene_id | "XLOC_189014"; | transcript_id | "Novel_002622"; | exon_number | "2"; | gene_type | " |
| Dt_chr5 | Cufflinks | exon | 51781046 | 51783164 | . | + | . | gene_id | "XLOC_189014"; | transcript_id | "Novel_002622"; | exon_number | "3"; | gene_type | " |
| Dt_chr5 | Cufflinks | exon | 53339900 | 53340015 | . | + | . | gene_id | "XLOC_189197"; | transcript_id | "Novel_002623"; | exon_number | "1"; | gene_type | " |
| Dt_chr5 | Cufflinks | exon | 53340143 | 53340237 | . | + | . | gene_id | "XLOC_189197"; | transcript_id | "Novel_002623"; | exon_number | "2"; | gene_type | " |
| Dt_chr5 | Cufflinks | exon | 53341888 | 53343495 | . | + | . | gene_id | "XLOC_189197"; | transcript_id | "Novel_002623"; | exon_number | "3"; | gene_type | " |
| Dt_chr5 | Cufflinks | exon | 53343586 | 53344769 | . | + | . | gene_id | "XLOC_189197"; | transcript_id | "Novel_002623"; | exon_number | "4"; | gene_type | " |
| Dt_chr5 | Cufflinks | exon | 53339900 | 53340015 | . | + | . | gene_id | "XLOC_189197"; | transcript_id | "Novel_002624"; | exon_number | "1"; | gene_type | " |
| Dt_chr5 | Cufflinks | exon | 53340143 | 53340237 | . | + | . | gene_id | "XLOC_189197"; | transcript_id | "Novel_002624"; | exon_number | "2"; | gene_type | " |
| Dt_chr5 | Cufflinks | exon | 53341888 | 53342976 | . | + | . | gene_id | "XLOC_189197"; | transcript_id | "Novel_002624"; | exon_number | "3"; | gene_type | " |
| Dt_chr5 | Cufflinks | exon | 53343052 | 53343495 | . | + | . | gene_id | "XLOC_189197"; | transcript_id | "Novel_002624"; | exon_number | "4"; | gene_type | " |
| Dt_chr5 | Cufflinks | exon | 53343586 | 53344769 | . | + | . | gene_id | "XLOC_189197"; | transcript_id | "Novel_002624"; | exon_number | "5"; | gene_type | " |
| Dt_chr5 | Cufflinks | exon | 57782392 | 57782949 | . | + | . | gene_id | "XLOC_189377"; | transcript_id | "Novel_002625"; | exon_number | "1"; | gene_type | " |
| Dt_chr5 | Cufflinks | exon | 57784008 | 57784251 | . | + | . | gene_id | "XLOC_189377"; | transcript_id | "Novel_002625"; | exon_number | "2"; | gene_type | " |
| Dt_chr5 | Cufflinks | exon | 4781005  | 4781301  | . | - | . | gene_id | "XLOC_190054"; | transcript_id | "Novel_002626"; | exon_number | "1"; | gene_type | " |
| Dt_chr5 | Cufflinks | exon | 4781405  | 4784153  | . | - | . | gene_id | "XLOC_190054"; | transcript_id | "Novel_002626"; | exon_number | "2"; | gene_type | " |
| Dt_chr5 | Cufflinks | exon | 5034863  | 5035112  | . | - | . | gene_id | "XLOC_190073"; | transcript_id | "Novel_002627"; | exon_number | "1"; | gene_type | " |
| Dt_chr5 | Cufflinks | exon | 5035854  | 5035901  | . | - | . | gene_id | "XLOC_190073"; | transcript_id | "Novel_002627"; | exon_number | "2"; | gene_type | " |
| Dt_chr5 | Cufflinks | exon | 5036032  | 5036097  | . | - | . | gene_id | "XLOC_190073"; | transcript_id | "Novel_002627"; | exon_number | "3"; | gene_type | " |
| Dt_chr5 | Cufflinks | exon | 5036868  | 5037069  | . | - | . | gene_id | "XLOC_190073"; | transcript_id | "Novel_002627"; | exon_number | "4"; | gene_type | " |
| Dt_chr5 | Cufflinks | exon | 5034863  | 5035112  | . | - | . | gene_id | "XLOC_190073"; | transcript_id | "Novel_002628"; | exon_number | "1"; | gene_type | " |
| Dt_chr5 | Cufflinks | exon | 5035854  | 5035901  | . | - | . | gene_id | "XLOC_190073"; | transcript_id | "Novel_002628"; | exon_number | "2"; | gene_type | " |
| Dt_chr5 | Cufflinks | exon | 5036025  | 5036097  | . | - | . | gene_id | "XLOC_190073"; | transcript_id | "Novel_002628"; | exon_number | "3"; | gene_type | " |
| Dt_chr5 | Cufflinks | exon | 5036868  | 5037069  | . | - | . | gene_id | "XLOC_190073"; | transcript_id | "Novel_002628"; | exon_number | "4"; | gene_type | " |
| Dt_chr5 | Cufflinks | exon | 5174849  | 5175847  | . | - | . | gene_id | "XLOC_190080"; | transcript_id | "Novel_002629"; | exon_number | "1"; | gene_type | " |
| Dt_chr5 | Cufflinks | exon | 5176038  | 5176263  | . | - | . | gene_id | "XLOC_190080"; | transcript_id | "Novel_002629"; | exon_number | "2"; | gene_type | " |
| Dt_chr5 | Cufflinks | exon | 5176340  | 5176794  | . | - | . | gene_id | "XLOC_190080"; | transcript_id | "Novel_002629"; | exon_number | "3"; | gene_type | " |
| Dt_chr5 | Cufflinks | exon | 5178197  | 5178516  | . | - | . | gene_id | "XLOC_190080"; | transcript_id | "Novel_002629"; | exon_number | "4"; | gene_type | " |
| Dt_chr5 | Cufflinks | exon | 5935657  | 5936005  | . | - | . | gene_id | "XLOC_190125"; | transcript_id | "Novel_002630"; | exon_number | "1"; | gene_type | " |
| Dt_chr5 | Cufflinks | exon | 6620831  | 6622678  | . | - | . | gene_id | "XLOC_190188"; | transcript_id | "Novel_002631"; | exon_number | "1"; | gene_type | " |

|         |           |      |          |          |   |   |         |                |               |                 |             |       |           |   |
|---------|-----------|------|----------|----------|---|---|---------|----------------|---------------|-----------------|-------------|-------|-----------|---|
| Dt_chr5 | Cufflinks | exon | 6623124  | 6623149  | . | . | gene_id | "XLOC_190188"; | transcript_id | "Novel_002631"; | exon_number | "2";  | gene_type | " |
| Dt_chr5 | Cufflinks | exon | 6623558  | 6623887  | . | . | gene_id | "XLOC_190188"; | transcript_id | "Novel_002631"; | exon_number | "3";  | gene_type | " |
| Dt_chr5 | Cufflinks | exon | 6620831  | 6622678  | . | . | gene_id | "XLOC_190188"; | transcript_id | "Novel_002632"; | exon_number | "1";  | gene_type | " |
| Dt_chr5 | Cufflinks | exon | 6623558  | 6623887  | . | . | gene_id | "XLOC_190188"; | transcript_id | "Novel_002632"; | exon_number | "2";  | gene_type | " |
| Dt_chr5 | Cufflinks | exon | 7248813  | 7250263  | . | . | gene_id | "XLOC_190308"; | transcript_id | "Novel_002633"; | exon_number | "1";  | gene_type | " |
| Dt_chr5 | Cufflinks | exon | 7250366  | 7250436  | . | . | gene_id | "XLOC_190308"; | transcript_id | "Novel_002633"; | exon_number | "2";  | gene_type | " |
| Dt_chr5 | Cufflinks | exon | 7250682  | 7250760  | . | . | gene_id | "XLOC_190308"; | transcript_id | "Novel_002633"; | exon_number | "3";  | gene_type | " |
| Dt_chr5 | Cufflinks | exon | 7250838  | 7250879  | . | . | gene_id | "XLOC_190308"; | transcript_id | "Novel_002633"; | exon_number | "4";  | gene_type | " |
| Dt_chr5 | Cufflinks | exon | 7250972  | 7251025  | . | . | gene_id | "XLOC_190308"; | transcript_id | "Novel_002633"; | exon_number | "5";  | gene_type | " |
| Dt_chr5 | Cufflinks | exon | 7251129  | 7251161  | . | . | gene_id | "XLOC_190308"; | transcript_id | "Novel_002633"; | exon_number | "6";  | gene_type | " |
| Dt_chr5 | Cufflinks | exon | 7251264  | 7251344  | . | . | gene_id | "XLOC_190308"; | transcript_id | "Novel_002633"; | exon_number | "7";  | gene_type | " |
| Dt_chr5 | Cufflinks | exon | 7251416  | 7251502  | . | . | gene_id | "XLOC_190308"; | transcript_id | "Novel_002633"; | exon_number | "8";  | gene_type | " |
| Dt_chr5 | Cufflinks | exon | 7251594  | 7251669  | . | . | gene_id | "XLOC_190308"; | transcript_id | "Novel_002633"; | exon_number | "9";  | gene_type | " |
| Dt_chr5 | Cufflinks | exon | 7251757  | 7251965  | . | . | gene_id | "XLOC_190308"; | transcript_id | "Novel_002633"; | exon_number | "10"; | gene_type | " |
| Dt_chr5 | Cufflinks | exon | 7252040  | 7252162  | . | . | gene_id | "XLOC_190308"; | transcript_id | "Novel_002633"; | exon_number | "11"; | gene_type | " |
| Dt_chr5 | Cufflinks | exon | 7252288  | 7252400  | . | . | gene_id | "XLOC_190308"; | transcript_id | "Novel_002633"; | exon_number | "12"; | gene_type | " |
| Dt_chr5 | Cufflinks | exon | 7253357  | 7253468  | . | . | gene_id | "XLOC_190308"; | transcript_id | "Novel_002633"; | exon_number | "13"; | gene_type | " |
| Dt_chr5 | Cufflinks | exon | 7257911  | 7258150  | . | . | gene_id | "XLOC_190308"; | transcript_id | "Novel_002633"; | exon_number | "14"; | gene_type | " |
| Dt_chr5 | Cufflinks | exon | 7248923  | 7250263  | . | . | gene_id | "XLOC_190308"; | transcript_id | "Novel_002634"; | exon_number | "1";  | gene_type | " |
| Dt_chr5 | Cufflinks | exon | 7250366  | 7250436  | . | . | gene_id | "XLOC_190308"; | transcript_id | "Novel_002634"; | exon_number | "2";  | gene_type | " |
| Dt_chr5 | Cufflinks | exon | 7250682  | 7250760  | . | . | gene_id | "XLOC_190308"; | transcript_id | "Novel_002634"; | exon_number | "3";  | gene_type | " |
| Dt_chr5 | Cufflinks | exon | 7250838  | 7250879  | . | . | gene_id | "XLOC_190308"; | transcript_id | "Novel_002634"; | exon_number | "4";  | gene_type | " |
| Dt_chr5 | Cufflinks | exon | 7250972  | 7251025  | . | . | gene_id | "XLOC_190308"; | transcript_id | "Novel_002634"; | exon_number | "5";  | gene_type | " |
| Dt_chr5 | Cufflinks | exon | 7251129  | 7251161  | . | . | gene_id | "XLOC_190308"; | transcript_id | "Novel_002634"; | exon_number | "6";  | gene_type | " |
| Dt_chr5 | Cufflinks | exon | 7251264  | 7251344  | . | . | gene_id | "XLOC_190308"; | transcript_id | "Novel_002634"; | exon_number | "7";  | gene_type | " |
| Dt_chr5 | Cufflinks | exon | 7251416  | 7251669  | . | . | gene_id | "XLOC_190308"; | transcript_id | "Novel_002634"; | exon_number | "8";  | gene_type | " |
| Dt_chr5 | Cufflinks | exon | 7251757  | 7252162  | . | . | gene_id | "XLOC_190308"; | transcript_id | "Novel_002634"; | exon_number | "9";  | gene_type | " |
| Dt_chr5 | Cufflinks | exon | 7252288  | 7252400  | . | . | gene_id | "XLOC_190308"; | transcript_id | "Novel_002634"; | exon_number | "10"; | gene_type | " |
| Dt_chr5 | Cufflinks | exon | 7253357  | 7253468  | . | . | gene_id | "XLOC_190308"; | transcript_id | "Novel_002634"; | exon_number | "11"; | gene_type | " |
| Dt_chr5 | Cufflinks | exon | 7257911  | 7258240  | . | . | gene_id | "XLOC_190308"; | transcript_id | "Novel_002634"; | exon_number | "12"; | gene_type | " |
| Dt_chr5 | Cufflinks | exon | 12420152 | 12420516 | . | . | gene_id | "XLOC_191151"; | transcript_id | "Novel_002635"; | exon_number | "1";  | gene_type | " |
| Dt_chr5 | Cufflinks | exon | 12420615 | 12420726 | . | . | gene_id | "XLOC_191151"; | transcript_id | "Novel_002635"; | exon_number | "2";  | gene_type | " |
| Dt_chr5 | Cufflinks | exon | 12420908 | 12421171 | . | . | gene_id | "XLOC_191151"; | transcript_id | "Novel_002635"; | exon_number | "3";  | gene_type | " |
| Dt_chr5 | Cufflinks | exon | 12421701 | 12421803 | . | . | gene_id | "XLOC_191151"; | transcript_id | "Novel_002635"; | exon_number | "4";  | gene_type | " |
| Dt_chr5 | Cufflinks | exon | 12422390 | 12422468 | . | . | gene_id | "XLOC_191151"; | transcript_id | "Novel_002635"; | exon_number | "5";  | gene_type | " |



|         |           |      |          |          |   |   |   |         |                |               |                 |             |      |           |   |
|---------|-----------|------|----------|----------|---|---|---|---------|----------------|---------------|-----------------|-------------|------|-----------|---|
| Dt_chr5 | Cufflinks | exon | 12422757 | 12422892 | . | - | . | gene_id | "XLOC_191151"; | transcript_id | "Novel_002635"; | exon_number | "6"; | gene_type | " |
| Dt_chr5 | Cufflinks | exon | 12479142 | 12481606 | . | - | . | gene_id | "XLOC_191170"; | transcript_id | "Novel_002636"; | exon_number | "1"; | gene_type | " |
| Dt_chr5 | Cufflinks | exon | 12481724 | 12481858 | . | - | . | gene_id | "XLOC_191170"; | transcript_id | "Novel_002636"; | exon_number | "2"; | gene_type | " |
| Dt_chr5 | Cufflinks | exon | 12483547 | 12483998 | . | - | . | gene_id | "XLOC_191170"; | transcript_id | "Novel_002636"; | exon_number | "3"; | gene_type | " |
| Dt_chr5 | Cufflinks | exon | 12479142 | 12481858 | . | - | . | gene_id | "XLOC_191170"; | transcript_id | "Novel_002637"; | exon_number | "1"; | gene_type | " |
| Dt_chr5 | Cufflinks | exon | 12483547 | 12483998 | . | - | . | gene_id | "XLOC_191170"; | transcript_id | "Novel_002637"; | exon_number | "2"; | gene_type | " |
| Dt_chr5 | Cufflinks | exon | 12479563 | 12481606 | . | - | . | gene_id | "XLOC_191170"; | transcript_id | "Novel_002638"; | exon_number | "1"; | gene_type | " |
| Dt_chr5 | Cufflinks | exon | 12481724 | 12481858 | . | - | . | gene_id | "XLOC_191170"; | transcript_id | "Novel_002638"; | exon_number | "2"; | gene_type | " |
| Dt_chr5 | Cufflinks | exon | 12483067 | 12483232 | . | - | . | gene_id | "XLOC_191170"; | transcript_id | "Novel_002638"; | exon_number | "3"; | gene_type | " |
| Dt_chr5 | Cufflinks | exon | 12483547 | 12483793 | . | - | . | gene_id | "XLOC_191170"; | transcript_id | "Novel_002638"; | exon_number | "4"; | gene_type | " |
| Dt_chr5 | Cufflinks | exon | 12501164 | 12502087 | . | - | . | gene_id | "XLOC_191173"; | transcript_id | "Novel_002639"; | exon_number | "1"; | gene_type | " |
| Dt_chr5 | Cufflinks | exon | 12503120 | 12503238 | . | - | . | gene_id | "XLOC_191173"; | transcript_id | "Novel_002639"; | exon_number | "2"; | gene_type | " |
| Dt_chr5 | Cufflinks | exon | 12504056 | 12504631 | . | - | . | gene_id | "XLOC_191173"; | transcript_id | "Novel_002639"; | exon_number | "3"; | gene_type | " |
| Dt_chr5 | Cufflinks | exon | 13022261 | 13022379 | . | - | . | gene_id | "XLOC_191276"; | transcript_id | "Novel_002640"; | exon_number | "1"; | gene_type | " |
| Dt_chr5 | Cufflinks | exon | 13022518 | 13022742 | . | - | . | gene_id | "XLOC_191276"; | transcript_id | "Novel_002640"; | exon_number | "2"; | gene_type | " |
| Dt_chr5 | Cufflinks | exon | 13476689 | 13476696 | . | - | . | gene_id | "XLOC_191370"; | transcript_id | "Novel_002641"; | exon_number | "1"; | gene_type | " |
| Dt_chr5 | Cufflinks | exon | 13476786 | 13477193 | . | - | . | gene_id | "XLOC_191370"; | transcript_id | "Novel_002641"; | exon_number | "2"; | gene_type | " |
| Dt_chr5 | Cufflinks | exon | 13555405 | 13555888 | . | - | . | gene_id | "XLOC_191381"; | transcript_id | "Novel_002642"; | exon_number | "1"; | gene_type | " |
| Dt_chr5 | Cufflinks | exon | 13555985 | 13556050 | . | - | . | gene_id | "XLOC_191381"; | transcript_id | "Novel_002642"; | exon_number | "2"; | gene_type | " |
| Dt_chr5 | Cufflinks | exon | 13556144 | 13558132 | . | - | . | gene_id | "XLOC_191381"; | transcript_id | "Novel_002642"; | exon_number | "3"; | gene_type | " |
| Dt_chr5 | Cufflinks | exon | 13558681 | 13559045 | . | - | . | gene_id | "XLOC_191381"; | transcript_id | "Novel_002642"; | exon_number | "4"; | gene_type | " |
| Dt_chr5 | Cufflinks | exon | 13555405 | 13555899 | . | - | . | gene_id | "XLOC_191381"; | transcript_id | "Novel_002643"; | exon_number | "1"; | gene_type | " |
| Dt_chr5 | Cufflinks | exon | 13555985 | 13556050 | . | - | . | gene_id | "XLOC_191381"; | transcript_id | "Novel_002643"; | exon_number | "2"; | gene_type | " |
| Dt_chr5 | Cufflinks | exon | 13556144 | 13558132 | . | - | . | gene_id | "XLOC_191381"; | transcript_id | "Novel_002643"; | exon_number | "3"; | gene_type | " |
| Dt_chr5 | Cufflinks | exon | 13558681 | 13559045 | . | - | . | gene_id | "XLOC_191381"; | transcript_id | "Novel_002643"; | exon_number | "4"; | gene_type | " |
| Dt_chr5 | Cufflinks | exon | 14757027 | 14757314 | . | - | . | gene_id | "XLOC_191582"; | transcript_id | "Novel_002644"; | exon_number | "1"; | gene_type | " |
| Dt_chr5 | Cufflinks | exon | 14757404 | 14758078 | . | - | . | gene_id | "XLOC_191582"; | transcript_id | "Novel_002644"; | exon_number | "2"; | gene_type | " |
| Dt_chr5 | Cufflinks | exon | 15978656 | 15978799 | . | - | . | gene_id | "XLOC_191674"; | transcript_id | "Novel_002645"; | exon_number | "1"; | gene_type | " |
| Dt_chr5 | Cufflinks | exon | 15978913 | 15978950 | . | - | . | gene_id | "XLOC_191674"; | transcript_id | "Novel_002645"; | exon_number | "2"; | gene_type | " |
| Dt_chr5 | Cufflinks | exon | 15979190 | 15979265 | . | - | . | gene_id | "XLOC_191674"; | transcript_id | "Novel_002645"; | exon_number | "3"; | gene_type | " |
| Dt_chr5 | Cufflinks | exon | 15979664 | 15979768 | . | - | . | gene_id | "XLOC_191674"; | transcript_id | "Novel_002645"; | exon_number | "4"; | gene_type | " |
| Dt_chr5 | Cufflinks | exon | 15980032 | 15980084 | . | - | . | gene_id | "XLOC_191674"; | transcript_id | "Novel_002645"; | exon_number | "5"; | gene_type | " |
| Dt_chr5 | Cufflinks | exon | 15980160 | 15980893 | . | - | . | gene_id | "XLOC_191674"; | transcript_id | "Novel_002645"; | exon_number | "6"; | gene_type | " |
| Dt_chr5 | Cufflinks | exon | 15981628 | 15982014 | . | - | . | gene_id | "XLOC_191674"; | transcript_id | "Novel_002645"; | exon_number | "7"; | gene_type | " |
| Dt_chr5 | Cufflinks | exon | 17361327 | 17361768 | . | - | . | gene_id | "XLOC_191908"; | transcript_id | "Novel_002646"; | exon_number | "1"; | gene_type | " |

|         |           |      |          |          |   |   |         |                |               |                 |             |      |           |   |
|---------|-----------|------|----------|----------|---|---|---------|----------------|---------------|-----------------|-------------|------|-----------|---|
| Dt_chr5 | Cufflinks | exon | 17362852 | 17362929 | . | . | gene_id | "XLOC_191908"; | transcript_id | "Novel_002646"; | exon_number | "2"; | gene_type | " |
| Dt_chr5 | Cufflinks | exon | 17364098 | 17364155 | . | . | gene_id | "XLOC_191908"; | transcript_id | "Novel_002646"; | exon_number | "3"; | gene_type | " |
| Dt_chr5 | Cufflinks | exon | 17364304 | 17364422 | . | . | gene_id | "XLOC_191908"; | transcript_id | "Novel_002646"; | exon_number | "4"; | gene_type | " |
| Dt_chr5 | Cufflinks | exon | 17364533 | 17364786 | . | . | gene_id | "XLOC_191908"; | transcript_id | "Novel_002646"; | exon_number | "5"; | gene_type | " |
| Dt_chr5 | Cufflinks | exon | 21769210 | 21769720 | . | . | gene_id | "XLOC_192382"; | transcript_id | "Novel_002647"; | exon_number | "1"; | gene_type | " |
| Dt_chr5 | Cufflinks | exon | 21770206 | 21770370 | . | . | gene_id | "XLOC_192382"; | transcript_id | "Novel_002647"; | exon_number | "2"; | gene_type | " |
| Dt_chr5 | Cufflinks | exon | 24818219 | 24818414 | . | . | gene_id | "XLOC_192600"; | transcript_id | "Novel_002648"; | exon_number | "1"; | gene_type | " |
| Dt_chr5 | Cufflinks | exon | 24818692 | 24818763 | . | . | gene_id | "XLOC_192600"; | transcript_id | "Novel_002648"; | exon_number | "2"; | gene_type | " |
| Dt_chr5 | Cufflinks | exon | 24818878 | 24818985 | . | . | gene_id | "XLOC_192600"; | transcript_id | "Novel_002648"; | exon_number | "3"; | gene_type | " |
| Dt_chr5 | Cufflinks | exon | 24819264 | 24819352 | . | . | gene_id | "XLOC_192600"; | transcript_id | "Novel_002648"; | exon_number | "4"; | gene_type | " |
| Dt_chr5 | Cufflinks | exon | 24819912 | 24820356 | . | . | gene_id | "XLOC_192600"; | transcript_id | "Novel_002648"; | exon_number | "5"; | gene_type | " |
| Dt_chr5 | Cufflinks | exon | 25860562 | 25860640 | . | . | gene_id | "XLOC_192712"; | transcript_id | "Novel_002649"; | exon_number | "1"; | gene_type | " |
| Dt_chr5 | Cufflinks | exon | 25861131 | 25861280 | . | . | gene_id | "XLOC_192712"; | transcript_id | "Novel_002649"; | exon_number | "2"; | gene_type | " |
| Dt_chr5 | Cufflinks | exon | 28400024 | 28400296 | . | . | gene_id | "XLOC_192887"; | transcript_id | "Novel_002650"; | exon_number | "1"; | gene_type | " |
| Dt_chr5 | Cufflinks | exon | 28404617 | 28404829 | . | . | gene_id | "XLOC_192887"; | transcript_id | "Novel_002650"; | exon_number | "2"; | gene_type | " |
| Dt_chr5 | Cufflinks | exon | 28404907 | 28404978 | . | . | gene_id | "XLOC_192887"; | transcript_id | "Novel_002650"; | exon_number | "3"; | gene_type | " |
| Dt_chr5 | Cufflinks | exon | 28405060 | 28405321 | . | . | gene_id | "XLOC_192887"; | transcript_id | "Novel_002650"; | exon_number | "4"; | gene_type | " |
| Dt_chr5 | Cufflinks | exon | 28404572 | 28404829 | . | . | gene_id | "XLOC_192887"; | transcript_id | "Novel_002651"; | exon_number | "1"; | gene_type | " |
| Dt_chr5 | Cufflinks | exon | 28404907 | 28404978 | . | . | gene_id | "XLOC_192887"; | transcript_id | "Novel_002651"; | exon_number | "2"; | gene_type | " |
| Dt_chr5 | Cufflinks | exon | 28405060 | 28405317 | . | . | gene_id | "XLOC_192887"; | transcript_id | "Novel_002651"; | exon_number | "3"; | gene_type | " |
| Dt_chr5 | Cufflinks | exon | 30767249 | 30767470 | . | . | gene_id | "XLOC_193002"; | transcript_id | "Novel_002652"; | exon_number | "1"; | gene_type | " |
| Dt_chr5 | Cufflinks | exon | 30767630 | 30767681 | . | . | gene_id | "XLOC_193002"; | transcript_id | "Novel_002652"; | exon_number | "2"; | gene_type | " |
| Dt_chr5 | Cufflinks | exon | 30768715 | 30769870 | . | . | gene_id | "XLOC_193002"; | transcript_id | "Novel_002652"; | exon_number | "3"; | gene_type | " |
| Dt_chr5 | Cufflinks | exon | 30770365 | 30770472 | . | . | gene_id | "XLOC_193002"; | transcript_id | "Novel_002652"; | exon_number | "4"; | gene_type | " |
| Dt_chr5 | Cufflinks | exon | 30770566 | 30770683 | . | . | gene_id | "XLOC_193002"; | transcript_id | "Novel_002652"; | exon_number | "5"; | gene_type | " |
| Dt_chr5 | Cufflinks | exon | 31664290 | 31664332 | . | . | gene_id | "XLOC_193072"; | transcript_id | "Novel_002653"; | exon_number | "1"; | gene_type | " |
| Dt_chr5 | Cufflinks | exon | 31664508 | 31664682 | . | . | gene_id | "XLOC_193072"; | transcript_id | "Novel_002653"; | exon_number | "2"; | gene_type | " |
| Dt_chr5 | Cufflinks | exon | 35206908 | 35208015 | . | . | gene_id | "XLOC_193374"; | transcript_id | "Novel_002654"; | exon_number | "1"; | gene_type | " |
| Dt_chr5 | Cufflinks | exon | 35208138 | 35209462 | . | . | gene_id | "XLOC_193374"; | transcript_id | "Novel_002654"; | exon_number | "2"; | gene_type | " |
| Dt_chr5 | Cufflinks | exon | 38347282 | 38347934 | . | . | gene_id | "XLOC_193601"; | transcript_id | "Novel_002655"; | exon_number | "1"; | gene_type | " |
| Dt_chr5 | Cufflinks | exon | 38349032 | 38349055 | . | . | gene_id | "XLOC_193601"; | transcript_id | "Novel_002655"; | exon_number | "2"; | gene_type | " |
| Dt_chr5 | Cufflinks | exon | 38616293 | 38619318 | . | . | gene_id | "XLOC_193617"; | transcript_id | "Novel_002656"; | exon_number | "1"; | gene_type | " |
| Dt_chr5 | Cufflinks | exon | 38620189 | 38620448 | . | . | gene_id | "XLOC_193617"; | transcript_id | "Novel_002656"; | exon_number | "2"; | gene_type | " |
| Dt_chr5 | Cufflinks | exon | 39863678 | 39864036 | . | . | gene_id | "XLOC_193711"; | transcript_id | "Novel_002657"; | exon_number | "1"; | gene_type | " |
| Dt_chr5 | Cufflinks | exon | 39864150 | 39864224 | . | . | gene_id | "XLOC_193711"; | transcript_id | "Novel_002657"; | exon_number | "2"; | gene_type | " |



|         |           |      |          |          |   |   |         |                |               |                 |             |       |           |
|---------|-----------|------|----------|----------|---|---|---------|----------------|---------------|-----------------|-------------|-------|-----------|
| Dt_chr5 | Cufflinks | exon | 39866799 | 39867065 | . | . | gene_id | "XLOC_193711"; | transcript_id | "Novel_002659"; | exon_number | "11"; | gene_type |
| Dt_chr5 | Cufflinks | exon | 39867267 | 39867366 | . | . | gene_id | "XLOC_193711"; | transcript_id | "Novel_002659"; | exon_number | "12"; | gene_type |
| Dt_chr5 | Cufflinks | exon | 39867469 | 39867757 | . | . | gene_id | "XLOC_193711"; | transcript_id | "Novel_002659"; | exon_number | "13"; | gene_type |
| Dt_chr5 | Cufflinks | exon | 39868027 | 39868507 | . | . | gene_id | "XLOC_193711"; | transcript_id | "Novel_002659"; | exon_number | "14"; | gene_type |
| Dt_chr5 | Cufflinks | exon | 40242634 | 40243299 | . | . | gene_id | "XLOC_193718"; | transcript_id | "Novel_002660"; | exon_number | "1";  | gene_type |
| Dt_chr5 | Cufflinks | exon | 40243416 | 40243572 | . | . | gene_id | "XLOC_193718"; | transcript_id | "Novel_002660"; | exon_number | "2";  | gene_type |
| Dt_chr5 | Cufflinks | exon | 40243719 | 40243791 | . | . | gene_id | "XLOC_193718"; | transcript_id | "Novel_002660"; | exon_number | "3";  | gene_type |
| Dt_chr5 | Cufflinks | exon | 40244395 | 40244485 | . | . | gene_id | "XLOC_193718"; | transcript_id | "Novel_002660"; | exon_number | "4";  | gene_type |
| Dt_chr5 | Cufflinks | exon | 40244568 | 40244883 | . | . | gene_id | "XLOC_193718"; | transcript_id | "Novel_002660"; | exon_number | "5";  | gene_type |
| Dt_chr5 | Cufflinks | exon | 41301265 | 41301736 | . | . | gene_id | "XLOC_193805"; | transcript_id | "Novel_002661"; | exon_number | "1";  | gene_type |
| Dt_chr5 | Cufflinks | exon | 41301828 | 41301926 | . | . | gene_id | "XLOC_193805"; | transcript_id | "Novel_002661"; | exon_number | "2";  | gene_type |
| Dt_chr5 | Cufflinks | exon | 41302060 | 41302164 | . | . | gene_id | "XLOC_193805"; | transcript_id | "Novel_002661"; | exon_number | "3";  | gene_type |
| Dt_chr5 | Cufflinks | exon | 41302255 | 41302347 | . | . | gene_id | "XLOC_193805"; | transcript_id | "Novel_002661"; | exon_number | "4";  | gene_type |
| Dt_chr5 | Cufflinks | exon | 41302443 | 41302535 | . | . | gene_id | "XLOC_193805"; | transcript_id | "Novel_002661"; | exon_number | "5";  | gene_type |
| Dt_chr5 | Cufflinks | exon | 41302618 | 41302671 | . | . | gene_id | "XLOC_193805"; | transcript_id | "Novel_002661"; | exon_number | "6";  | gene_type |
| Dt_chr5 | Cufflinks | exon | 41302790 | 41302891 | . | . | gene_id | "XLOC_193805"; | transcript_id | "Novel_002661"; | exon_number | "7";  | gene_type |
| Dt_chr5 | Cufflinks | exon | 41303046 | 41303120 | . | . | gene_id | "XLOC_193805"; | transcript_id | "Novel_002661"; | exon_number | "8";  | gene_type |
| Dt_chr5 | Cufflinks | exon | 41303272 | 41303906 | . | . | gene_id | "XLOC_193805"; | transcript_id | "Novel_002661"; | exon_number | "9";  | gene_type |
| Dt_chr5 | Cufflinks | exon | 41301380 | 41301736 | . | . | gene_id | "XLOC_193805"; | transcript_id | "Novel_002662"; | exon_number | "1";  | gene_type |
| Dt_chr5 | Cufflinks | exon | 41301828 | 41301926 | . | . | gene_id | "XLOC_193805"; | transcript_id | "Novel_002662"; | exon_number | "2";  | gene_type |
| Dt_chr5 | Cufflinks | exon | 41302060 | 41302174 | . | . | gene_id | "XLOC_193805"; | transcript_id | "Novel_002662"; | exon_number | "3";  | gene_type |
| Dt_chr5 | Cufflinks | exon | 41302255 | 41302347 | . | . | gene_id | "XLOC_193805"; | transcript_id | "Novel_002662"; | exon_number | "4";  | gene_type |
| Dt_chr5 | Cufflinks | exon | 41302443 | 41302535 | . | . | gene_id | "XLOC_193805"; | transcript_id | "Novel_002662"; | exon_number | "5";  | gene_type |
| Dt_chr5 | Cufflinks | exon | 41302618 | 41302671 | . | . | gene_id | "XLOC_193805"; | transcript_id | "Novel_002662"; | exon_number | "6";  | gene_type |
| Dt_chr5 | Cufflinks | exon | 41302790 | 41302891 | . | . | gene_id | "XLOC_193805"; | transcript_id | "Novel_002662"; | exon_number | "7";  | gene_type |
| Dt_chr5 | Cufflinks | exon | 41303046 | 41303120 | . | . | gene_id | "XLOC_193805"; | transcript_id | "Novel_002662"; | exon_number | "8";  | gene_type |
| Dt_chr5 | Cufflinks | exon | 41303272 | 41303895 | . | . | gene_id | "XLOC_193805"; | transcript_id | "Novel_002662"; | exon_number | "9";  | gene_type |
| Dt_chr5 | Cufflinks | exon | 41676257 | 41677760 | . | . | gene_id | "XLOC_193824"; | transcript_id | "Novel_002663"; | exon_number | "1";  | gene_type |
| Dt_chr5 | Cufflinks | exon | 41679947 | 41680205 | . | . | gene_id | "XLOC_193824"; | transcript_id | "Novel_002663"; | exon_number | "2";  | gene_type |
| Dt_chr5 | Cufflinks | exon | 43033914 | 43034197 | . | . | gene_id | "XLOC_193913"; | transcript_id | "Novel_002664"; | exon_number | "1";  | gene_type |
| Dt_chr5 | Cufflinks | exon | 43034338 | 43034435 | . | . | gene_id | "XLOC_193913"; | transcript_id | "Novel_002664"; | exon_number | "2";  | gene_type |
| Dt_chr5 | Cufflinks | exon | 43034741 | 43034921 | . | . | gene_id | "XLOC_193913"; | transcript_id | "Novel_002664"; | exon_number | "3";  | gene_type |
| Dt_chr5 | Cufflinks | exon | 43035007 | 43035084 | . | . | gene_id | "XLOC_193913"; | transcript_id | "Novel_002664"; | exon_number | "4";  | gene_type |
| Dt_chr5 | Cufflinks | exon | 43035520 | 43035648 | . | . | gene_id | "XLOC_193913"; | transcript_id | "Novel_002664"; | exon_number | "5";  | gene_type |
| Dt_chr5 | Cufflinks | exon | 47665063 | 47669565 | . | . | gene_id | "XLOC_194169"; | transcript_id | "Novel_002665"; | exon_number | "1";  | gene_type |

|         |           |      |          |          |   |   |   |         |                |               |                 |             |      |           |   |
|---------|-----------|------|----------|----------|---|---|---|---------|----------------|---------------|-----------------|-------------|------|-----------|---|
| Dt_chr5 | Cufflinks | exon | 47670769 | 47671110 | . | - | . | gene_id | "XLOC_194169"; | transcript_id | "Novel_002665"; | exon_number | "2"; | gene_type | " |
| Dt_chr5 | Cufflinks | exon | 49873293 | 49874266 | . | - | . | gene_id | "XLOC_194349"; | transcript_id | "Novel_002666"; | exon_number | "1"; | gene_type | " |
| Dt_chr5 | Cufflinks | exon | 49874451 | 49874853 | . | - | . | gene_id | "XLOC_194349"; | transcript_id | "Novel_002666"; | exon_number | "2"; | gene_type | " |
| Dt_chr5 | Cufflinks | exon | 50959840 | 50960877 | . | - | . | gene_id | "XLOC_194457"; | transcript_id | "Novel_002667"; | exon_number | "1"; | gene_type | " |
| Dt_chr5 | Cufflinks | exon | 50960971 | 50961135 | . | - | . | gene_id | "XLOC_194457"; | transcript_id | "Novel_002667"; | exon_number | "2"; | gene_type | " |
| Dt_chr5 | Cufflinks | exon | 54369101 | 54370336 | . | - | . | gene_id | "XLOC_194732"; | transcript_id | "Novel_002668"; | exon_number | "1"; | gene_type | " |
| Dt_chr5 | Cufflinks | exon | 54375602 | 54375655 | . | - | . | gene_id | "XLOC_194732"; | transcript_id | "Novel_002668"; | exon_number | "2"; | gene_type | " |
| Dt_chr5 | Cufflinks | exon | 54376021 | 54376030 | . | - | . | gene_id | "XLOC_194732"; | transcript_id | "Novel_002668"; | exon_number | "3"; | gene_type | " |
| Dt_chr5 | Cufflinks | exon | 54369101 | 54370336 | . | - | . | gene_id | "XLOC_194732"; | transcript_id | "Novel_002669"; | exon_number | "1"; | gene_type | " |
| Dt_chr5 | Cufflinks | exon | 54375602 | 54376081 | . | - | . | gene_id | "XLOC_194732"; | transcript_id | "Novel_002669"; | exon_number | "2"; | gene_type | " |
| Dt_chr5 | Cufflinks | exon | 54374297 | 54374925 | . | - | . | gene_id | "XLOC_194732"; | transcript_id | "Novel_002670"; | exon_number | "1"; | gene_type | " |
| Dt_chr5 | Cufflinks | exon | 54375602 | 54375655 | . | - | . | gene_id | "XLOC_194732"; | transcript_id | "Novel_002670"; | exon_number | "2"; | gene_type | " |
| Dt_chr5 | Cufflinks | exon | 54376021 | 54376064 | . | - | . | gene_id | "XLOC_194732"; | transcript_id | "Novel_002670"; | exon_number | "3"; | gene_type | " |
| Dt_chr6 | Cufflinks | exon | 221019   | 221109   | . | + | . | gene_id | "XLOC_195391"; | transcript_id | "Novel_002671"; | exon_number | "1"; | gene_type | " |
| Dt_chr6 | Cufflinks | exon | 221225   | 221356   | . | + | . | gene_id | "XLOC_195391"; | transcript_id | "Novel_002671"; | exon_number | "2"; | gene_type | " |
| Dt_chr6 | Cufflinks | exon | 222308   | 222893   | . | + | . | gene_id | "XLOC_195391"; | transcript_id | "Novel_002671"; | exon_number | "3"; | gene_type | " |
| Dt_chr6 | Cufflinks | exon | 221357   | 221358   | . | + | . | gene_id | "XLOC_195391"; | transcript_id | "Novel_002672"; | exon_number | "1"; | gene_type | " |
| Dt_chr6 | Cufflinks | exon | 222310   | 222958   | . | + | . | gene_id | "XLOC_195391"; | transcript_id | "Novel_002672"; | exon_number | "2"; | gene_type | " |
| Dt_chr6 | Cufflinks | exon | 785243   | 786119   | . | + | . | gene_id | "XLOC_195444"; | transcript_id | "Novel_002673"; | exon_number | "1"; | gene_type | " |
| Dt_chr6 | Cufflinks | exon | 786202   | 786562   | . | + | . | gene_id | "XLOC_195444"; | transcript_id | "Novel_002673"; | exon_number | "2"; | gene_type | " |
| Dt_chr6 | Cufflinks | exon | 790053   | 791534   | . | + | . | gene_id | "XLOC_195444"; | transcript_id | "Novel_002673"; | exon_number | "3"; | gene_type | " |
| Dt_chr6 | Cufflinks | exon | 785243   | 785771   | . | + | . | gene_id | "XLOC_195444"; | transcript_id | "Novel_002674"; | exon_number | "1"; | gene_type | " |
| Dt_chr6 | Cufflinks | exon | 786070   | 786119   | . | + | . | gene_id | "XLOC_195444"; | transcript_id | "Novel_002674"; | exon_number | "2"; | gene_type | " |
| Dt_chr6 | Cufflinks | exon | 786202   | 786562   | . | + | . | gene_id | "XLOC_195444"; | transcript_id | "Novel_002674"; | exon_number | "3"; | gene_type | " |
| Dt_chr6 | Cufflinks | exon | 790053   | 791534   | . | + | . | gene_id | "XLOC_195444"; | transcript_id | "Novel_002674"; | exon_number | "4"; | gene_type | " |
| Dt_chr6 | Cufflinks | exon | 785265   | 785771   | . | + | . | gene_id | "XLOC_195444"; | transcript_id | "Novel_002675"; | exon_number | "1"; | gene_type | " |
| Dt_chr6 | Cufflinks | exon | 786075   | 786119   | . | + | . | gene_id | "XLOC_195444"; | transcript_id | "Novel_002675"; | exon_number | "2"; | gene_type | " |
| Dt_chr6 | Cufflinks | exon | 786202   | 786562   | . | + | . | gene_id | "XLOC_195444"; | transcript_id | "Novel_002675"; | exon_number | "3"; | gene_type | " |
| Dt_chr6 | Cufflinks | exon | 790053   | 791568   | . | + | . | gene_id | "XLOC_195444"; | transcript_id | "Novel_002675"; | exon_number | "4"; | gene_type | " |
| Dt_chr6 | Cufflinks | exon | 2057808  | 2057981  | . | + | . | gene_id | "XLOC_195569"; | transcript_id | "Novel_002676"; | exon_number | "1"; | gene_type | " |
| Dt_chr6 | Cufflinks | exon | 2058167  | 2058897  | . | + | . | gene_id | "XLOC_195569"; | transcript_id | "Novel_002676"; | exon_number | "2"; | gene_type | " |
| Dt_chr6 | Cufflinks | exon | 2240700  | 2240993  | . | + | . | gene_id | "XLOC_195579"; | transcript_id | "Novel_002677"; | exon_number | "1"; | gene_type | " |
| Dt_chr6 | Cufflinks | exon | 2241082  | 2241504  | . | + | . | gene_id | "XLOC_195579"; | transcript_id | "Novel_002677"; | exon_number | "2"; | gene_type | " |
| Dt_chr6 | Cufflinks | exon | 2705901  | 2706133  | . | + | . | gene_id | "XLOC_195640"; | transcript_id | "Novel_002678"; | exon_number | "1"; | gene_type | " |
| Dt_chr6 | Cufflinks | exon | 2706346  | 2706401  | . | + | . | gene_id | "XLOC_195640"; | transcript_id | "Novel_002678"; | exon_number | "2"; | gene_type | " |

|         |           |      |         |         |   |   |   |         |                |               |                 |             |      |           |   |
|---------|-----------|------|---------|---------|---|---|---|---------|----------------|---------------|-----------------|-------------|------|-----------|---|
| Dt_chr6 | Cufflinks | exon | 2706586 | 2706656 | . | + | . | gene_id | "XLOC_195640"; | transcript_id | "Novel_002678"; | exon_number | "3"; | gene_type | " |
| Dt_chr6 | Cufflinks | exon | 2707315 | 2707405 | . | + | . | gene_id | "XLOC_195640"; | transcript_id | "Novel_002678"; | exon_number | "4"; | gene_type | " |
| Dt_chr6 | Cufflinks | exon | 2707513 | 2707624 | . | + | . | gene_id | "XLOC_195640"; | transcript_id | "Novel_002678"; | exon_number | "5"; | gene_type | " |
| Dt_chr6 | Cufflinks | exon | 2708041 | 2709155 | . | + | . | gene_id | "XLOC_195640"; | transcript_id | "Novel_002678"; | exon_number | "6"; | gene_type | " |
| Dt_chr6 | Cufflinks | exon | 2706093 | 2706133 | . | + | . | gene_id | "XLOC_195640"; | transcript_id | "Novel_002679"; | exon_number | "1"; | gene_type | " |
| Dt_chr6 | Cufflinks | exon | 2706346 | 2706401 | . | + | . | gene_id | "XLOC_195640"; | transcript_id | "Novel_002679"; | exon_number | "2"; | gene_type | " |
| Dt_chr6 | Cufflinks | exon | 2706586 | 2707405 | . | + | . | gene_id | "XLOC_195640"; | transcript_id | "Novel_002679"; | exon_number | "3"; | gene_type | " |
| Dt_chr6 | Cufflinks | exon | 2707513 | 2707624 | . | + | . | gene_id | "XLOC_195640"; | transcript_id | "Novel_002679"; | exon_number | "4"; | gene_type | " |
| Dt_chr6 | Cufflinks | exon | 2708041 | 2709137 | . | + | . | gene_id | "XLOC_195640"; | transcript_id | "Novel_002679"; | exon_number | "5"; | gene_type | " |
| Dt_chr6 | Cufflinks | exon | 4228758 | 4228826 | . | + | . | gene_id | "XLOC_195865"; | transcript_id | "Novel_002680"; | exon_number | "1"; | gene_type | " |
| Dt_chr6 | Cufflinks | exon | 4229300 | 4229339 | . | + | . | gene_id | "XLOC_195865"; | transcript_id | "Novel_002680"; | exon_number | "2"; | gene_type | " |
| Dt_chr6 | Cufflinks | exon | 4229625 | 4229713 | . | + | . | gene_id | "XLOC_195865"; | transcript_id | "Novel_002680"; | exon_number | "3"; | gene_type | " |
| Dt_chr6 | Cufflinks | exon | 4229827 | 4229909 | . | + | . | gene_id | "XLOC_195865"; | transcript_id | "Novel_002680"; | exon_number | "4"; | gene_type | " |
| Dt_chr6 | Cufflinks | exon | 4229998 | 4230264 | . | + | . | gene_id | "XLOC_195865"; | transcript_id | "Novel_002680"; | exon_number | "5"; | gene_type | " |
| Dt_chr6 | Cufflinks | exon | 6211292 | 6211727 | . | + | . | gene_id | "XLOC_196198"; | transcript_id | "Novel_002681"; | exon_number | "1"; | gene_type | " |
| Dt_chr6 | Cufflinks | exon | 6211855 | 6212680 | . | + | . | gene_id | "XLOC_196198"; | transcript_id | "Novel_002681"; | exon_number | "2"; | gene_type | " |
| Dt_chr6 | Cufflinks | exon | 6356582 | 6356693 | . | + | . | gene_id | "XLOC_196218"; | transcript_id | "Novel_002682"; | exon_number | "1"; | gene_type | " |
| Dt_chr6 | Cufflinks | exon | 6357187 | 6357323 | . | + | . | gene_id | "XLOC_196218"; | transcript_id | "Novel_002682"; | exon_number | "2"; | gene_type | " |
| Dt_chr6 | Cufflinks | exon | 6364491 | 6364639 | . | + | . | gene_id | "XLOC_196218"; | transcript_id | "Novel_002682"; | exon_number | "3"; | gene_type | " |
| Dt_chr6 | Cufflinks | exon | 6365102 | 6365188 | . | + | . | gene_id | "XLOC_196218"; | transcript_id | "Novel_002682"; | exon_number | "4"; | gene_type | " |
| Dt_chr6 | Cufflinks | exon | 6365478 | 6365636 | . | + | . | gene_id | "XLOC_196218"; | transcript_id | "Novel_002682"; | exon_number | "5"; | gene_type | " |
| Dt_chr6 | Cufflinks | exon | 6365876 | 6366696 | . | + | . | gene_id | "XLOC_196218"; | transcript_id | "Novel_002682"; | exon_number | "6"; | gene_type | " |
| Dt_chr6 | Cufflinks | exon | 6710988 | 6713196 | . | + | . | gene_id | "XLOC_196299"; | transcript_id | "Novel_002683"; | exon_number | "1"; | gene_type | " |
| Dt_chr6 | Cufflinks | exon | 6713340 | 6714237 | . | + | . | gene_id | "XLOC_196299"; | transcript_id | "Novel_002683"; | exon_number | "2"; | gene_type | " |
| Dt_chr6 | Cufflinks | exon | 7411601 | 7412759 | . | + | . | gene_id | "XLOC_196429"; | transcript_id | "Novel_002684"; | exon_number | "1"; | gene_type | " |
| Dt_chr6 | Cufflinks | exon | 8000199 | 8000298 | . | + | . | gene_id | "XLOC_196511"; | transcript_id | "Novel_002685"; | exon_number | "1"; | gene_type | " |
| Dt_chr6 | Cufflinks | exon | 8000821 | 8002269 | . | + | . | gene_id | "XLOC_196511"; | transcript_id | "Novel_002685"; | exon_number | "2"; | gene_type | " |
| Dt_chr6 | Cufflinks | exon | 8755583 | 8755980 | . | + | . | gene_id | "XLOC_196614"; | transcript_id | "Novel_002686"; | exon_number | "1"; | gene_type | " |
| Dt_chr6 | Cufflinks | exon | 8763310 | 8763860 | . | + | . | gene_id | "XLOC_196614"; | transcript_id | "Novel_002686"; | exon_number | "2"; | gene_type | " |
| Dt_chr6 | Cufflinks | exon | 9418591 | 9418689 | . | + | . | gene_id | "XLOC_196732"; | transcript_id | "Novel_002687"; | exon_number | "1"; | gene_type | " |
| Dt_chr6 | Cufflinks | exon | 9419729 | 9419846 | . | + | . | gene_id | "XLOC_196732"; | transcript_id | "Novel_002687"; | exon_number | "2"; | gene_type | " |
| Dt_chr6 | Cufflinks | exon | 9420827 | 9420866 | . | + | . | gene_id | "XLOC_196732"; | transcript_id | "Novel_002687"; | exon_number | "3"; | gene_type | " |
| Dt_chr6 | Cufflinks | exon | 9421019 | 9421114 | . | + | . | gene_id | "XLOC_196732"; | transcript_id | "Novel_002687"; | exon_number | "4"; | gene_type | " |
| Dt_chr6 | Cufflinks | exon | 9421727 | 9421923 | . | + | . | gene_id | "XLOC_196732"; | transcript_id | "Novel_002687"; | exon_number | "5"; | gene_type | " |
| Dt_chr6 | Cufflinks | exon | 9422054 | 9422140 | . | + | . | gene_id | "XLOC_196732"; | transcript_id | "Novel_002687"; | exon_number | "6"; | gene_type | " |

|         |           |      |          |          |   |   |   |         |                              |                             |                |   |
|---------|-----------|------|----------|----------|---|---|---|---------|------------------------------|-----------------------------|----------------|---|
| Dt_chr6 | Cufflinks | exon | 9422250  | 9422496  | . | + | . | gene_id | "XLOC_196732"; transcript_id | "Novel_002687"; exon_number | "7"; gene_type | " |
| Dt_chr6 | Cufflinks | exon | 9418591  | 9418689  | . | + | . | gene_id | "XLOC_196732"; transcript_id | "Novel_002688"; exon_number | "1"; gene_type | " |
| Dt_chr6 | Cufflinks | exon | 9419729  | 9419846  | . | + | . | gene_id | "XLOC_196732"; transcript_id | "Novel_002688"; exon_number | "2"; gene_type | " |
| Dt_chr6 | Cufflinks | exon | 9420827  | 9420866  | . | + | . | gene_id | "XLOC_196732"; transcript_id | "Novel_002688"; exon_number | "3"; gene_type | " |
| Dt_chr6 | Cufflinks | exon | 9421019  | 9421114  | . | + | . | gene_id | "XLOC_196732"; transcript_id | "Novel_002688"; exon_number | "4"; gene_type | " |
| Dt_chr6 | Cufflinks | exon | 9421727  | 9421923  | . | + | . | gene_id | "XLOC_196732"; transcript_id | "Novel_002688"; exon_number | "5"; gene_type | " |
| Dt_chr6 | Cufflinks | exon | 9422054  | 9422140  | . | + | . | gene_id | "XLOC_196732"; transcript_id | "Novel_002688"; exon_number | "6"; gene_type | " |
| Dt_chr6 | Cufflinks | exon | 9422247  | 9422905  | . | + | . | gene_id | "XLOC_196732"; transcript_id | "Novel_002688"; exon_number | "7"; gene_type | " |
| Dt_chr6 | Cufflinks | exon | 9711525  | 9711750  | . | + | . | gene_id | "XLOC_196790"; transcript_id | "Novel_002689"; exon_number | "1"; gene_type | " |
| Dt_chr6 | Cufflinks | exon | 9712012  | 9712063  | . | + | . | gene_id | "XLOC_196790"; transcript_id | "Novel_002689"; exon_number | "2"; gene_type | " |
| Dt_chr6 | Cufflinks | exon | 9712368  | 9712982  | . | + | . | gene_id | "XLOC_196790"; transcript_id | "Novel_002689"; exon_number | "3"; gene_type | " |
| Dt_chr6 | Cufflinks | exon | 9711525  | 9711750  | . | + | . | gene_id | "XLOC_196790"; transcript_id | "Novel_002690"; exon_number | "1"; gene_type | " |
| Dt_chr6 | Cufflinks | exon | 9712012  | 9712063  | . | + | . | gene_id | "XLOC_196790"; transcript_id | "Novel_002690"; exon_number | "2"; gene_type | " |
| Dt_chr6 | Cufflinks | exon | 9712368  | 9712444  | . | + | . | gene_id | "XLOC_196790"; transcript_id | "Novel_002690"; exon_number | "3"; gene_type | " |
| Dt_chr6 | Cufflinks | exon | 9712536  | 9712669  | . | + | . | gene_id | "XLOC_196790"; transcript_id | "Novel_002690"; exon_number | "4"; gene_type | " |
| Dt_chr6 | Cufflinks | exon | 9712893  | 9712982  | . | + | . | gene_id | "XLOC_196790"; transcript_id | "Novel_002690"; exon_number | "5"; gene_type | " |
| Dt_chr6 | Cufflinks | exon | 9996695  | 9997425  | . | + | . | gene_id | "XLOC_196824"; transcript_id | "Novel_002691"; exon_number | "1"; gene_type | " |
| Dt_chr6 | Cufflinks | exon | 9997704  | 9997826  | . | + | . | gene_id | "XLOC_196824"; transcript_id | "Novel_002691"; exon_number | "2"; gene_type | " |
| Dt_chr6 | Cufflinks | exon | 9998617  | 9998862  | . | + | . | gene_id | "XLOC_196824"; transcript_id | "Novel_002691"; exon_number | "3"; gene_type | " |
| Dt_chr6 | Cufflinks | exon | 12205339 | 12205403 | . | + | . | gene_id | "XLOC_197108"; transcript_id | "Novel_002692"; exon_number | "1"; gene_type | " |
| Dt_chr6 | Cufflinks | exon | 12205504 | 12205597 | . | + | . | gene_id | "XLOC_197108"; transcript_id | "Novel_002692"; exon_number | "2"; gene_type | " |
| Dt_chr6 | Cufflinks | exon | 12205808 | 12205917 | . | + | . | gene_id | "XLOC_197108"; transcript_id | "Novel_002692"; exon_number | "3"; gene_type | " |
| Dt_chr6 | Cufflinks | exon | 12337001 | 12337247 | . | + | . | gene_id | "XLOC_197121"; transcript_id | "Novel_002693"; exon_number | "1"; gene_type | " |
| Dt_chr6 | Cufflinks | exon | 12337350 | 12337445 | . | + | . | gene_id | "XLOC_197121"; transcript_id | "Novel_002693"; exon_number | "2"; gene_type | " |
| Dt_chr6 | Cufflinks | exon | 12337655 | 12337712 | . | + | . | gene_id | "XLOC_197121"; transcript_id | "Novel_002693"; exon_number | "3"; gene_type | " |
| Dt_chr6 | Cufflinks | exon | 13641866 | 13642533 | . | + | . | gene_id | "XLOC_197338"; transcript_id | "Novel_002694"; exon_number | "1"; gene_type | " |
| Dt_chr6 | Cufflinks | exon | 13642896 | 13643877 | . | + | . | gene_id | "XLOC_197338"; transcript_id | "Novel_002694"; exon_number | "2"; gene_type | " |
| Dt_chr6 | Cufflinks | exon | 14276296 | 14276606 | . | + | . | gene_id | "XLOC_197433"; transcript_id | "Novel_002695"; exon_number | "1"; gene_type | " |
| Dt_chr6 | Cufflinks | exon | 14277210 | 14278278 | . | + | . | gene_id | "XLOC_197433"; transcript_id | "Novel_002695"; exon_number | "2"; gene_type | " |
| Dt_chr6 | Cufflinks | exon | 14278947 | 14279390 | . | + | . | gene_id | "XLOC_197433"; transcript_id | "Novel_002695"; exon_number | "3"; gene_type | " |
| Dt_chr6 | Cufflinks | exon | 14280411 | 14280466 | . | + | . | gene_id | "XLOC_197433"; transcript_id | "Novel_002695"; exon_number | "4"; gene_type | " |
| Dt_chr6 | Cufflinks | exon | 14276357 | 14276606 | . | + | . | gene_id | "XLOC_197433"; transcript_id | "Novel_002696"; exon_number | "1"; gene_type | " |
| Dt_chr6 | Cufflinks | exon | 14276950 | 14277074 | . | + | . | gene_id | "XLOC_197433"; transcript_id | "Novel_002696"; exon_number | "2"; gene_type | " |
| Dt_chr6 | Cufflinks | exon | 14277210 | 14278278 | . | + | . | gene_id | "XLOC_197433"; transcript_id | "Novel_002696"; exon_number | "3"; gene_type | " |
| Dt_chr6 | Cufflinks | exon | 14278947 | 14279390 | . | + | . | gene_id | "XLOC_197433"; transcript_id | "Novel_002696"; exon_number | "4"; gene_type | " |

|         |           |      |          |          |   |   |   |         |                |               |                 |             |      |           |   |
|---------|-----------|------|----------|----------|---|---|---|---------|----------------|---------------|-----------------|-------------|------|-----------|---|
| Dt_chr6 | Cufflinks | exon | 14280411 | 14281485 | . | + | . | gene_id | "XLOC_197433"; | transcript_id | "Novel_002696"; | exon_number | "5"; | gene_type | " |
| Dt_chr6 | Cufflinks | exon | 14276357 | 14276606 | . | + | . | gene_id | "XLOC_197433"; | transcript_id | "Novel_002697"; | exon_number | "1"; | gene_type | " |
| Dt_chr6 | Cufflinks | exon | 14276950 | 14276988 | . | + | . | gene_id | "XLOC_197433"; | transcript_id | "Novel_002697"; | exon_number | "2"; | gene_type | " |
| Dt_chr6 | Cufflinks | exon | 14277210 | 14278278 | . | + | . | gene_id | "XLOC_197433"; | transcript_id | "Novel_002697"; | exon_number | "3"; | gene_type | " |
| Dt_chr6 | Cufflinks | exon | 14278947 | 14279390 | . | + | . | gene_id | "XLOC_197433"; | transcript_id | "Novel_002697"; | exon_number | "4"; | gene_type | " |
| Dt_chr6 | Cufflinks | exon | 14280411 | 14281485 | . | + | . | gene_id | "XLOC_197433"; | transcript_id | "Novel_002697"; | exon_number | "5"; | gene_type | " |
| Dt_chr6 | Cufflinks | exon | 14276569 | 14276606 | . | + | . | gene_id | "XLOC_197433"; | transcript_id | "Novel_002698"; | exon_number | "1"; | gene_type | " |
| Dt_chr6 | Cufflinks | exon | 14276950 | 14278278 | . | + | . | gene_id | "XLOC_197433"; | transcript_id | "Novel_002698"; | exon_number | "2"; | gene_type | " |
| Dt_chr6 | Cufflinks | exon | 14278947 | 14279390 | . | + | . | gene_id | "XLOC_197433"; | transcript_id | "Novel_002698"; | exon_number | "3"; | gene_type | " |
| Dt_chr6 | Cufflinks | exon | 14280411 | 14281465 | . | + | . | gene_id | "XLOC_197433"; | transcript_id | "Novel_002698"; | exon_number | "4"; | gene_type | " |
| Dt_chr6 | Cufflinks | exon | 14360079 | 14360269 | . | + | . | gene_id | "XLOC_197441"; | transcript_id | "Novel_002699"; | exon_number | "1"; | gene_type | " |
| Dt_chr6 | Cufflinks | exon | 14360390 | 14361969 | . | + | . | gene_id | "XLOC_197441"; | transcript_id | "Novel_002699"; | exon_number | "2"; | gene_type | " |
| Dt_chr6 | Cufflinks | exon | 14905530 | 14907903 | . | + | . | gene_id | "XLOC_197530"; | transcript_id | "Novel_002700"; | exon_number | "1"; | gene_type | " |
| Dt_chr6 | Cufflinks | exon | 14907992 | 14908254 | . | + | . | gene_id | "XLOC_197530"; | transcript_id | "Novel_002700"; | exon_number | "2"; | gene_type | " |
| Dt_chr6 | Cufflinks | exon | 14906044 | 14906047 | . | + | . | gene_id | "XLOC_197530"; | transcript_id | "Novel_002701"; | exon_number | "1"; | gene_type | " |
| Dt_chr6 | Cufflinks | exon | 14906155 | 14906236 | . | + | . | gene_id | "XLOC_197530"; | transcript_id | "Novel_002701"; | exon_number | "2"; | gene_type | " |
| Dt_chr6 | Cufflinks | exon | 14906327 | 14906423 | . | + | . | gene_id | "XLOC_197530"; | transcript_id | "Novel_002701"; | exon_number | "3"; | gene_type | " |
| Dt_chr6 | Cufflinks | exon | 14906588 | 14906663 | . | + | . | gene_id | "XLOC_197530"; | transcript_id | "Novel_002701"; | exon_number | "4"; | gene_type | " |
| Dt_chr6 | Cufflinks | exon | 14906757 | 14906815 | . | + | . | gene_id | "XLOC_197530"; | transcript_id | "Novel_002701"; | exon_number | "5"; | gene_type | " |
| Dt_chr6 | Cufflinks | exon | 14906927 | 14907049 | . | + | . | gene_id | "XLOC_197530"; | transcript_id | "Novel_002701"; | exon_number | "6"; | gene_type | " |
| Dt_chr6 | Cufflinks | exon | 14907636 | 14907693 | . | + | . | gene_id | "XLOC_197530"; | transcript_id | "Novel_002701"; | exon_number | "7"; | gene_type | " |
| Dt_chr6 | Cufflinks | exon | 14907818 | 14907903 | . | + | . | gene_id | "XLOC_197530"; | transcript_id | "Novel_002701"; | exon_number | "8"; | gene_type | " |
| Dt_chr6 | Cufflinks | exon | 14907992 | 14908563 | . | + | . | gene_id | "XLOC_197530"; | transcript_id | "Novel_002701"; | exon_number | "9"; | gene_type | " |
| Dt_chr6 | Cufflinks | exon | 14906741 | 14907693 | . | + | . | gene_id | "XLOC_197530"; | transcript_id | "Novel_002702"; | exon_number | "1"; | gene_type | " |
| Dt_chr6 | Cufflinks | exon | 14907818 | 14907903 | . | + | . | gene_id | "XLOC_197530"; | transcript_id | "Novel_002702"; | exon_number | "2"; | gene_type | " |
| Dt_chr6 | Cufflinks | exon | 14907992 | 14908444 | . | + | . | gene_id | "XLOC_197530"; | transcript_id | "Novel_002702"; | exon_number | "3"; | gene_type | " |
| Dt_chr6 | Cufflinks | exon | 20833472 | 20833698 | . | + | . | gene_id | "XLOC_198188"; | transcript_id | "Novel_002703"; | exon_number | "1"; | gene_type | " |
| Dt_chr6 | Cufflinks | exon | 23729612 | 23730620 | . | + | . | gene_id | "XLOC_198408"; | transcript_id | "Novel_002704"; | exon_number | "1"; | gene_type | " |
| Dt_chr6 | Cufflinks | exon | 23731033 | 23731143 | . | + | . | gene_id | "XLOC_198408"; | transcript_id | "Novel_002704"; | exon_number | "2"; | gene_type | " |
| Dt_chr6 | Cufflinks | exon | 23731580 | 23731647 | . | + | . | gene_id | "XLOC_198408"; | transcript_id | "Novel_002704"; | exon_number | "3"; | gene_type | " |
| Dt_chr6 | Cufflinks | exon | 23731789 | 23732619 | . | + | . | gene_id | "XLOC_198408"; | transcript_id | "Novel_002704"; | exon_number | "4"; | gene_type | " |
| Dt_chr6 | Cufflinks | exon | 23730215 | 23730466 | . | + | . | gene_id | "XLOC_198408"; | transcript_id | "Novel_002705"; | exon_number | "1"; | gene_type | " |
| Dt_chr6 | Cufflinks | exon | 23730553 | 23730620 | . | + | . | gene_id | "XLOC_198408"; | transcript_id | "Novel_002705"; | exon_number | "2"; | gene_type | " |
| Dt_chr6 | Cufflinks | exon | 23731033 | 23731143 | . | + | . | gene_id | "XLOC_198408"; | transcript_id | "Novel_002705"; | exon_number | "3"; | gene_type | " |
| Dt_chr6 | Cufflinks | exon | 23731561 | 23731647 | . | + | . | gene_id | "XLOC_198408"; | transcript_id | "Novel_002705"; | exon_number | "4"; | gene_type | " |



|         |           |      |          |          |   |   |   |         |                |               |                 |             |      |           |   |
|---------|-----------|------|----------|----------|---|---|---|---------|----------------|---------------|-----------------|-------------|------|-----------|---|
| Dt_chr6 | Cufflinks | exon | 23731789 | 23732769 | . | + | . | gene_id | "XLOC_198408"; | transcript_id | "Novel_002705"; | exon_number | "5"; | gene_type | " |
| Dt_chr6 | Cufflinks | exon | 23730974 | 23731647 | . | + | . | gene_id | "XLOC_198408"; | transcript_id | "Novel_002706"; | exon_number | "1"; | gene_type | " |
| Dt_chr6 | Cufflinks | exon | 23731789 | 23732957 | . | + | . | gene_id | "XLOC_198408"; | transcript_id | "Novel_002706"; | exon_number | "2"; | gene_type | " |
| Dt_chr6 | Cufflinks | exon | 24146642 | 24146814 | . | + | . | gene_id | "XLOC_198431"; | transcript_id | "Novel_002707"; | exon_number | "1"; | gene_type | " |
| Dt_chr6 | Cufflinks | exon | 24147836 | 24148225 | . | + | . | gene_id | "XLOC_198431"; | transcript_id | "Novel_002707"; | exon_number | "2"; | gene_type | " |
| Dt_chr6 | Cufflinks | exon | 24226495 | 24226713 | . | + | . | gene_id | "XLOC_198436"; | transcript_id | "Novel_002708"; | exon_number | "1"; | gene_type | " |
| Dt_chr6 | Cufflinks | exon | 24227556 | 24227646 | . | + | . | gene_id | "XLOC_198436"; | transcript_id | "Novel_002708"; | exon_number | "2"; | gene_type | " |
| Dt_chr6 | Cufflinks | exon | 24227769 | 24227896 | . | + | . | gene_id | "XLOC_198436"; | transcript_id | "Novel_002708"; | exon_number | "3"; | gene_type | " |
| Dt_chr6 | Cufflinks | exon | 24228270 | 24228392 | . | + | . | gene_id | "XLOC_198436"; | transcript_id | "Novel_002708"; | exon_number | "4"; | gene_type | " |
| Dt_chr6 | Cufflinks | exon | 24228510 | 24228598 | . | + | . | gene_id | "XLOC_198436"; | transcript_id | "Novel_002708"; | exon_number | "5"; | gene_type | " |
| Dt_chr6 | Cufflinks | exon | 24228708 | 24228828 | . | + | . | gene_id | "XLOC_198436"; | transcript_id | "Novel_002708"; | exon_number | "6"; | gene_type | " |
| Dt_chr6 | Cufflinks | exon | 24228940 | 24229254 | . | + | . | gene_id | "XLOC_198436"; | transcript_id | "Novel_002708"; | exon_number | "7"; | gene_type | " |
| Dt_chr6 | Cufflinks | exon | 24229348 | 24229605 | . | + | . | gene_id | "XLOC_198436"; | transcript_id | "Novel_002709"; | exon_number | "1"; | gene_type | " |
| Dt_chr6 | Cufflinks | exon | 24229685 | 24229881 | . | + | . | gene_id | "XLOC_198436"; | transcript_id | "Novel_002709"; | exon_number | "2"; | gene_type | " |
| Dt_chr6 | Cufflinks | exon | 24230148 | 24230476 | . | + | . | gene_id | "XLOC_198436"; | transcript_id | "Novel_002709"; | exon_number | "3"; | gene_type | " |
| Dt_chr6 | Cufflinks | exon | 24229557 | 24229881 | . | + | . | gene_id | "XLOC_198436"; | transcript_id | "Novel_002710"; | exon_number | "1"; | gene_type | " |
| Dt_chr6 | Cufflinks | exon | 24230148 | 24230599 | . | + | . | gene_id | "XLOC_198436"; | transcript_id | "Novel_002710"; | exon_number | "2"; | gene_type | " |
| Dt_chr6 | Cufflinks | exon | 24236861 | 24237046 | . | + | . | gene_id | "XLOC_198441"; | transcript_id | "Novel_002711"; | exon_number | "1"; | gene_type | " |
| Dt_chr6 | Cufflinks | exon | 24237374 | 24237542 | . | + | . | gene_id | "XLOC_198441"; | transcript_id | "Novel_002711"; | exon_number | "2"; | gene_type | " |
| Dt_chr6 | Cufflinks | exon | 24237653 | 24237761 | . | + | . | gene_id | "XLOC_198441"; | transcript_id | "Novel_002711"; | exon_number | "3"; | gene_type | " |
| Dt_chr6 | Cufflinks | exon | 24238647 | 24238729 | . | + | . | gene_id | "XLOC_198441"; | transcript_id | "Novel_002711"; | exon_number | "4"; | gene_type | " |
| Dt_chr6 | Cufflinks | exon | 24238809 | 24238871 | . | + | . | gene_id | "XLOC_198441"; | transcript_id | "Novel_002711"; | exon_number | "5"; | gene_type | " |
| Dt_chr6 | Cufflinks | exon | 24238973 | 24239552 | . | + | . | gene_id | "XLOC_198441"; | transcript_id | "Novel_002711"; | exon_number | "6"; | gene_type | " |
| Dt_chr6 | Cufflinks | exon | 30463076 | 30466924 | . | + | . | gene_id | "XLOC_198868"; | transcript_id | "Novel_002712"; | exon_number | "1"; | gene_type | " |
| Dt_chr6 | Cufflinks | exon | 30467023 | 30467620 | . | + | . | gene_id | "XLOC_198868"; | transcript_id | "Novel_002712"; | exon_number | "2"; | gene_type | " |
| Dt_chr6 | Cufflinks | exon | 34678408 | 34678512 | . | + | . | gene_id | "XLOC_199088"; | transcript_id | "Novel_002713"; | exon_number | "1"; | gene_type | " |
| Dt_chr6 | Cufflinks | exon | 34678598 | 34678799 | . | + | . | gene_id | "XLOC_199088"; | transcript_id | "Novel_002713"; | exon_number | "2"; | gene_type | " |
| Dt_chr6 | Cufflinks | exon | 35489250 | 35489494 | . | + | . | gene_id | "XLOC_199145"; | transcript_id | "Novel_002714"; | exon_number | "1"; | gene_type | " |
| Dt_chr6 | Cufflinks | exon | 35489722 | 35489795 | . | + | . | gene_id | "XLOC_199145"; | transcript_id | "Novel_002714"; | exon_number | "2"; | gene_type | " |
| Dt_chr6 | Cufflinks | exon | 35490075 | 35490763 | . | + | . | gene_id | "XLOC_199145"; | transcript_id | "Novel_002714"; | exon_number | "3"; | gene_type | " |
| Dt_chr6 | Cufflinks | exon | 35491030 | 35491134 | . | + | . | gene_id | "XLOC_199145"; | transcript_id | "Novel_002714"; | exon_number | "4"; | gene_type | " |
| Dt_chr6 | Cufflinks | exon | 35491596 | 35492505 | . | + | . | gene_id | "XLOC_199145"; | transcript_id | "Novel_002714"; | exon_number | "5"; | gene_type | " |
| Dt_chr6 | Cufflinks | exon | 35489307 | 35489494 | . | + | . | gene_id | "XLOC_199145"; | transcript_id | "Novel_002715"; | exon_number | "1"; | gene_type | " |
| Dt_chr6 | Cufflinks | exon | 35489765 | 35489795 | . | + | . | gene_id | "XLOC_199145"; | transcript_id | "Novel_002715"; | exon_number | "2"; | gene_type | " |
| Dt_chr6 | Cufflinks | exon | 35490075 | 35490763 | . | + | . | gene_id | "XLOC_199145"; | transcript_id | "Novel_002715"; | exon_number | "3"; | gene_type | " |



|         |           |      |          |          |   |   |   |         |                |               |                 |             |       |           |   |
|---------|-----------|------|----------|----------|---|---|---|---------|----------------|---------------|-----------------|-------------|-------|-----------|---|
| Dt_chr6 | Cufflinks | exon | 43348895 | 43348939 | . | + | . | gene_id | "XLOC_199737"; | transcript_id | "Novel_002722"; | exon_number | "4";  | gene_type | " |
| Dt_chr6 | Cufflinks | exon | 43349049 | 43349198 | . | + | . | gene_id | "XLOC_199737"; | transcript_id | "Novel_002722"; | exon_number | "5";  | gene_type | " |
| Dt_chr6 | Cufflinks | exon | 43349283 | 43349541 | . | + | . | gene_id | "XLOC_199737"; | transcript_id | "Novel_002722"; | exon_number | "6";  | gene_type | " |
| Dt_chr6 | Cufflinks | exon | 43349643 | 43349776 | . | + | . | gene_id | "XLOC_199737"; | transcript_id | "Novel_002722"; | exon_number | "7";  | gene_type | " |
| Dt_chr6 | Cufflinks | exon | 43349908 | 43350063 | . | + | . | gene_id | "XLOC_199737"; | transcript_id | "Novel_002722"; | exon_number | "8";  | gene_type | " |
| Dt_chr6 | Cufflinks | exon | 43350450 | 43350529 | . | + | . | gene_id | "XLOC_199737"; | transcript_id | "Novel_002722"; | exon_number | "9";  | gene_type | " |
| Dt_chr6 | Cufflinks | exon | 43351801 | 43352145 | . | + | . | gene_id | "XLOC_199737"; | transcript_id | "Novel_002722"; | exon_number | "10"; | gene_type | " |
| Dt_chr6 | Cufflinks | exon | 43598205 | 43598801 | . | + | . | gene_id | "XLOC_199757"; | transcript_id | "Novel_002723"; | exon_number | "1";  | gene_type | " |
| Dt_chr6 | Cufflinks | exon | 43600231 | 43600279 | . | + | . | gene_id | "XLOC_199757"; | transcript_id | "Novel_002723"; | exon_number | "2";  | gene_type | " |
| Dt_chr6 | Cufflinks | exon | 44068451 | 44068562 | . | + | . | gene_id | "XLOC_199785"; | transcript_id | "Novel_002724"; | exon_number | "1";  | gene_type | " |
| Dt_chr6 | Cufflinks | exon | 44068726 | 44069001 | . | + | . | gene_id | "XLOC_199785"; | transcript_id | "Novel_002724"; | exon_number | "2";  | gene_type | " |
| Dt_chr6 | Cufflinks | exon | 44069406 | 44069969 | . | + | . | gene_id | "XLOC_199785"; | transcript_id | "Novel_002724"; | exon_number | "3";  | gene_type | " |
| Dt_chr6 | Cufflinks | exon | 1054877  | 1055167  | . | - | . | gene_id | "XLOC_199915"; | transcript_id | "Novel_002725"; | exon_number | "1";  | gene_type | " |
| Dt_chr6 | Cufflinks | exon | 1333129  | 1333543  | . | - | . | gene_id | "XLOC_199930"; | transcript_id | "Novel_002726"; | exon_number | "1";  | gene_type | " |
| Dt_chr6 | Cufflinks | exon | 1334658  | 1335047  | . | - | . | gene_id | "XLOC_199930"; | transcript_id | "Novel_002726"; | exon_number | "2";  | gene_type | " |
| Dt_chr6 | Cufflinks | exon | 1335178  | 1335339  | . | - | . | gene_id | "XLOC_199930"; | transcript_id | "Novel_002726"; | exon_number | "3";  | gene_type | " |
| Dt_chr6 | Cufflinks | exon | 1334357  | 1335047  | . | - | . | gene_id | "XLOC_199930"; | transcript_id | "Novel_002727"; | exon_number | "1";  | gene_type | " |
| Dt_chr6 | Cufflinks | exon | 1335178  | 1335339  | . | - | . | gene_id | "XLOC_199930"; | transcript_id | "Novel_002727"; | exon_number | "2";  | gene_type | " |
| Dt_chr6 | Cufflinks | exon | 2971210  | 2972233  | . | - | . | gene_id | "XLOC_200045"; | transcript_id | "Novel_002728"; | exon_number | "1";  | gene_type | " |
| Dt_chr6 | Cufflinks | exon | 2974590  | 2974817  | . | - | . | gene_id | "XLOC_200045"; | transcript_id | "Novel_002728"; | exon_number | "2";  | gene_type | " |
| Dt_chr6 | Cufflinks | exon | 2975037  | 2975185  | . | - | . | gene_id | "XLOC_200045"; | transcript_id | "Novel_002728"; | exon_number | "3";  | gene_type | " |
| Dt_chr6 | Cufflinks | exon | 2975788  | 2975968  | . | - | . | gene_id | "XLOC_200045"; | transcript_id | "Novel_002728"; | exon_number | "4";  | gene_type | " |
| Dt_chr6 | Cufflinks | exon | 2976224  | 2976430  | . | - | . | gene_id | "XLOC_200045"; | transcript_id | "Novel_002728"; | exon_number | "5";  | gene_type | " |
| Dt_chr6 | Cufflinks | exon | 2977718  | 2978134  | . | - | . | gene_id | "XLOC_200045"; | transcript_id | "Novel_002728"; | exon_number | "6";  | gene_type | " |
| Dt_chr6 | Cufflinks | exon | 4035516  | 4036196  | . | - | . | gene_id | "XLOC_200260"; | transcript_id | "Novel_002729"; | exon_number | "1";  | gene_type | " |
| Dt_chr6 | Cufflinks | exon | 4036393  | 4036608  | . | - | . | gene_id | "XLOC_200260"; | transcript_id | "Novel_002729"; | exon_number | "2";  | gene_type | " |
| Dt_chr6 | Cufflinks | exon | 4036749  | 4036946  | . | - | . | gene_id | "XLOC_200260"; | transcript_id | "Novel_002729"; | exon_number | "3";  | gene_type | " |
| Dt_chr6 | Cufflinks | exon | 4037126  | 4037304  | . | - | . | gene_id | "XLOC_200260"; | transcript_id | "Novel_002729"; | exon_number | "4";  | gene_type | " |
| Dt_chr6 | Cufflinks | exon | 4035567  | 4036196  | . | - | . | gene_id | "XLOC_200260"; | transcript_id | "Novel_002730"; | exon_number | "1";  | gene_type | " |
| Dt_chr6 | Cufflinks | exon | 4036393  | 4036946  | . | - | . | gene_id | "XLOC_200260"; | transcript_id | "Novel_002730"; | exon_number | "2";  | gene_type | " |
| Dt_chr6 | Cufflinks | exon | 4037126  | 4037312  | . | - | . | gene_id | "XLOC_200260"; | transcript_id | "Novel_002730"; | exon_number | "3";  | gene_type | " |
| Dt_chr6 | Cufflinks | exon | 4723330  | 4724414  | . | - | . | gene_id | "XLOC_200378"; | transcript_id | "Novel_002731"; | exon_number | "1";  | gene_type | " |
| Dt_chr6 | Cufflinks | exon | 4725008  | 4725137  | . | - | . | gene_id | "XLOC_200378"; | transcript_id | "Novel_002731"; | exon_number | "2";  | gene_type | " |
| Dt_chr6 | Cufflinks | exon | 4725245  | 4725521  | . | - | . | gene_id | "XLOC_200378"; | transcript_id | "Novel_002731"; | exon_number | "3";  | gene_type | " |
| Dt_chr6 | Cufflinks | exon | 4725625  | 4725673  | . | - | . | gene_id | "XLOC_200378"; | transcript_id | "Novel_002731"; | exon_number | "4";  | gene_type | " |

|         |           |      |          |          |   |   |   |         |                              |                             |                |   |
|---------|-----------|------|----------|----------|---|---|---|---------|------------------------------|-----------------------------|----------------|---|
| Dt_chr6 | Cufflinks | exon | 4725759  | 4725843  | . | - | . | gene_id | "XLOC_200378"; transcript_id | "Novel_002731"; exon_number | "5"; gene_type | " |
| Dt_chr6 | Cufflinks | exon | 5424204  | 5425161  | . | - | . | gene_id | "XLOC_200490"; transcript_id | "Novel_002732"; exon_number | "1"; gene_type | " |
| Dt_chr6 | Cufflinks | exon | 5425354  | 5426985  | . | - | . | gene_id | "XLOC_200490"; transcript_id | "Novel_002732"; exon_number | "2"; gene_type | " |
| Dt_chr6 | Cufflinks | exon | 5427129  | 5427169  | . | - | . | gene_id | "XLOC_200490"; transcript_id | "Novel_002732"; exon_number | "3"; gene_type | " |
| Dt_chr6 | Cufflinks | exon | 5427672  | 5427691  | . | - | . | gene_id | "XLOC_200490"; transcript_id | "Novel_002732"; exon_number | "4"; gene_type | " |
| Dt_chr6 | Cufflinks | exon | 5424230  | 5425161  | . | - | . | gene_id | "XLOC_200490"; transcript_id | "Novel_002733"; exon_number | "1"; gene_type | " |
| Dt_chr6 | Cufflinks | exon | 5425354  | 5426985  | . | - | . | gene_id | "XLOC_200490"; transcript_id | "Novel_002733"; exon_number | "2"; gene_type | " |
| Dt_chr6 | Cufflinks | exon | 5427129  | 5427604  | . | - | . | gene_id | "XLOC_200490"; transcript_id | "Novel_002733"; exon_number | "3"; gene_type | " |
| Dt_chr6 | Cufflinks | exon | 13786205 | 13786511 | . | - | . | gene_id | "XLOC_201850"; transcript_id | "Novel_002734"; exon_number | "1"; gene_type | " |
| Dt_chr6 | Cufflinks | exon | 13786627 | 13787422 | . | - | . | gene_id | "XLOC_201850"; transcript_id | "Novel_002734"; exon_number | "2"; gene_type | " |
| Dt_chr6 | Cufflinks | exon | 14847708 | 14848876 | . | - | . | gene_id | "XLOC_202027"; transcript_id | "Novel_002735"; exon_number | "1"; gene_type | " |
| Dt_chr6 | Cufflinks | exon | 14849009 | 14849062 | . | - | . | gene_id | "XLOC_202027"; transcript_id | "Novel_002735"; exon_number | "2"; gene_type | " |
| Dt_chr6 | Cufflinks | exon | 15532149 | 15532380 | . | - | . | gene_id | "XLOC_202147"; transcript_id | "Novel_002736"; exon_number | "1"; gene_type | " |
| Dt_chr6 | Cufflinks | exon | 15648304 | 15648933 | . | - | . | gene_id | "XLOC_202156"; transcript_id | "Novel_002737"; exon_number | "1"; gene_type | " |
| Dt_chr6 | Cufflinks | exon | 15649233 | 15649382 | . | - | . | gene_id | "XLOC_202156"; transcript_id | "Novel_002737"; exon_number | "2"; gene_type | " |
| Dt_chr6 | Cufflinks | exon | 17103001 | 17104213 | . | - | . | gene_id | "XLOC_202379"; transcript_id | "Novel_002738"; exon_number | "1"; gene_type | " |
| Dt_chr6 | Cufflinks | exon | 17104654 | 17104838 | . | - | . | gene_id | "XLOC_202379"; transcript_id | "Novel_002738"; exon_number | "2"; gene_type | " |
| Dt_chr6 | Cufflinks | exon | 18313604 | 18314334 | . | - | . | gene_id | "XLOC_202542"; transcript_id | "Novel_002739"; exon_number | "1"; gene_type | " |
| Dt_chr6 | Cufflinks | exon | 18314587 | 18314768 | . | - | . | gene_id | "XLOC_202542"; transcript_id | "Novel_002739"; exon_number | "2"; gene_type | " |
| Dt_chr6 | Cufflinks | exon | 18314951 | 18315028 | . | - | . | gene_id | "XLOC_202542"; transcript_id | "Novel_002739"; exon_number | "3"; gene_type | " |
| Dt_chr6 | Cufflinks | exon | 18315103 | 18315174 | . | - | . | gene_id | "XLOC_202542"; transcript_id | "Novel_002739"; exon_number | "4"; gene_type | " |
| Dt_chr6 | Cufflinks | exon | 18315779 | 18315850 | . | - | . | gene_id | "XLOC_202542"; transcript_id | "Novel_002739"; exon_number | "5"; gene_type | " |
| Dt_chr6 | Cufflinks | exon | 18315995 | 18316401 | . | - | . | gene_id | "XLOC_202542"; transcript_id | "Novel_002739"; exon_number | "6"; gene_type | " |
| Dt_chr6 | Cufflinks | exon | 21926471 | 21928364 | . | - | . | gene_id | "XLOC_202876"; transcript_id | "Novel_002740"; exon_number | "1"; gene_type | " |
| Dt_chr6 | Cufflinks | exon | 21929185 | 21930151 | . | - | . | gene_id | "XLOC_202876"; transcript_id | "Novel_002740"; exon_number | "2"; gene_type | " |
| Dt_chr6 | Cufflinks | exon | 23995917 | 23996176 | . | - | . | gene_id | "XLOC_203032"; transcript_id | "Novel_002741"; exon_number | "1"; gene_type | " |
| Dt_chr6 | Cufflinks | exon | 24150017 | 24150403 | . | - | . | gene_id | "XLOC_203051"; transcript_id | "Novel_002742"; exon_number | "1"; gene_type | " |
| Dt_chr6 | Cufflinks | exon | 24151864 | 24152728 | . | - | . | gene_id | "XLOC_203051"; transcript_id | "Novel_002742"; exon_number | "2"; gene_type | " |
| Dt_chr6 | Cufflinks | exon | 24152957 | 24153152 | . | - | . | gene_id | "XLOC_203051"; transcript_id | "Novel_002742"; exon_number | "3"; gene_type | " |
| Dt_chr6 | Cufflinks | exon | 24154004 | 24154472 | . | - | . | gene_id | "XLOC_203051"; transcript_id | "Novel_002742"; exon_number | "4"; gene_type | " |
| Dt_chr6 | Cufflinks | exon | 26188190 | 26188663 | . | - | . | gene_id | "XLOC_203247"; transcript_id | "Novel_002743"; exon_number | "1"; gene_type | " |
| Dt_chr6 | Cufflinks | exon | 26189020 | 26189127 | . | - | . | gene_id | "XLOC_203247"; transcript_id | "Novel_002743"; exon_number | "2"; gene_type | " |
| Dt_chr6 | Cufflinks | exon | 26190585 | 26190629 | . | - | . | gene_id | "XLOC_203247"; transcript_id | "Novel_002743"; exon_number | "3"; gene_type | " |
| Dt_chr6 | Cufflinks | exon | 26190789 | 26191058 | . | - | . | gene_id | "XLOC_203247"; transcript_id | "Novel_002743"; exon_number | "4"; gene_type | " |
| Dt_chr6 | Cufflinks | exon | 30382541 | 30383142 | . | - | . | gene_id | "XLOC_203465"; transcript_id | "Novel_002744"; exon_number | "1"; gene_type | " |

|         |           |      |          |          |   |   |   |         |                |               |                 |             |      |           |   |
|---------|-----------|------|----------|----------|---|---|---|---------|----------------|---------------|-----------------|-------------|------|-----------|---|
| Dt_chr6 | Cufflinks | exon | 30384421 | 30384561 | . | - | . | gene_id | "XLOC_203465"; | transcript_id | "Novel_002744"; | exon_number | "2"; | gene_type | " |
| Dt_chr6 | Cufflinks | exon | 30384678 | 30384809 | . | - | . | gene_id | "XLOC_203465"; | transcript_id | "Novel_002744"; | exon_number | "3"; | gene_type | " |
| Dt_chr6 | Cufflinks | exon | 30384913 | 30385164 | . | - | . | gene_id | "XLOC_203465"; | transcript_id | "Novel_002744"; | exon_number | "4"; | gene_type | " |
| Dt_chr6 | Cufflinks | exon | 30383087 | 30384561 | . | - | . | gene_id | "XLOC_203465"; | transcript_id | "Novel_002745"; | exon_number | "1"; | gene_type | " |
| Dt_chr6 | Cufflinks | exon | 30384678 | 30384813 | . | - | . | gene_id | "XLOC_203465"; | transcript_id | "Novel_002745"; | exon_number | "2"; | gene_type | " |
| Dt_chr6 | Cufflinks | exon | 30384913 | 30385158 | . | - | . | gene_id | "XLOC_203465"; | transcript_id | "Novel_002745"; | exon_number | "3"; | gene_type | " |
| Dt_chr6 | Cufflinks | exon | 30526574 | 30530027 | . | - | . | gene_id | "XLOC_203479"; | transcript_id | "Novel_002746"; | exon_number | "1"; | gene_type | " |
| Dt_chr6 | Cufflinks | exon | 30530163 | 30530346 | . | - | . | gene_id | "XLOC_203479"; | transcript_id | "Novel_002746"; | exon_number | "2"; | gene_type | " |
| Dt_chr6 | Cufflinks | exon | 30526592 | 30529659 | . | - | . | gene_id | "XLOC_203479"; | transcript_id | "Novel_002747"; | exon_number | "1"; | gene_type | " |
| Dt_chr6 | Cufflinks | exon | 30529756 | 30530027 | . | - | . | gene_id | "XLOC_203479"; | transcript_id | "Novel_002747"; | exon_number | "2"; | gene_type | " |
| Dt_chr6 | Cufflinks | exon | 30530163 | 30530265 | . | - | . | gene_id | "XLOC_203479"; | transcript_id | "Novel_002747"; | exon_number | "3"; | gene_type | " |
| Dt_chr6 | Cufflinks | exon | 30526660 | 30526980 | . | - | . | gene_id | "XLOC_203479"; | transcript_id | "Novel_002748"; | exon_number | "1"; | gene_type | " |
| Dt_chr6 | Cufflinks | exon | 30529279 | 30529344 | . | - | . | gene_id | "XLOC_203479"; | transcript_id | "Novel_002748"; | exon_number | "2"; | gene_type | " |
| Dt_chr6 | Cufflinks | exon | 30529429 | 30530027 | . | - | . | gene_id | "XLOC_203479"; | transcript_id | "Novel_002748"; | exon_number | "3"; | gene_type | " |
| Dt_chr6 | Cufflinks | exon | 30530163 | 30530346 | . | - | . | gene_id | "XLOC_203479"; | transcript_id | "Novel_002748"; | exon_number | "4"; | gene_type | " |
| Dt_chr6 | Cufflinks | exon | 32302798 | 32303345 | . | - | . | gene_id | "XLOC_203560"; | transcript_id | "Novel_002749"; | exon_number | "1"; | gene_type | " |
| Dt_chr6 | Cufflinks | exon | 32303751 | 32305278 | . | - | . | gene_id | "XLOC_203560"; | transcript_id | "Novel_002749"; | exon_number | "2"; | gene_type | " |
| Dt_chr6 | Cufflinks | exon | 32305747 | 32305826 | . | - | . | gene_id | "XLOC_203560"; | transcript_id | "Novel_002749"; | exon_number | "3"; | gene_type | " |
| Dt_chr6 | Cufflinks | exon | 32306873 | 32307013 | . | - | . | gene_id | "XLOC_203560"; | transcript_id | "Novel_002749"; | exon_number | "4"; | gene_type | " |
| Dt_chr6 | Cufflinks | exon | 32302865 | 32303345 | . | - | . | gene_id | "XLOC_203560"; | transcript_id | "Novel_002750"; | exon_number | "1"; | gene_type | " |
| Dt_chr6 | Cufflinks | exon | 32303751 | 32303875 | . | - | . | gene_id | "XLOC_203560"; | transcript_id | "Novel_002750"; | exon_number | "2"; | gene_type | " |
| Dt_chr6 | Cufflinks | exon | 32305212 | 32305278 | . | - | . | gene_id | "XLOC_203560"; | transcript_id | "Novel_002750"; | exon_number | "3"; | gene_type | " |
| Dt_chr6 | Cufflinks | exon | 32305747 | 32307001 | . | - | . | gene_id | "XLOC_203560"; | transcript_id | "Novel_002750"; | exon_number | "4"; | gene_type | " |
| Dt_chr6 | Cufflinks | exon | 32602019 | 32602301 | . | - | . | gene_id | "XLOC_203569"; | transcript_id | "Novel_002751"; | exon_number | "1"; | gene_type | " |
| Dt_chr6 | Cufflinks | exon | 32602629 | 32602899 | . | - | . | gene_id | "XLOC_203569"; | transcript_id | "Novel_002751"; | exon_number | "2"; | gene_type | " |
| Dt_chr6 | Cufflinks | exon | 33571730 | 33571983 | . | - | . | gene_id | "XLOC_203640"; | transcript_id | "Novel_002752"; | exon_number | "1"; | gene_type | " |
| Dt_chr6 | Cufflinks | exon | 33572231 | 33572293 | . | - | . | gene_id | "XLOC_203640"; | transcript_id | "Novel_002752"; | exon_number | "2"; | gene_type | " |
| Dt_chr6 | Cufflinks | exon | 33572417 | 33572509 | . | - | . | gene_id | "XLOC_203640"; | transcript_id | "Novel_002752"; | exon_number | "3"; | gene_type | " |
| Dt_chr6 | Cufflinks | exon | 33573210 | 33573267 | . | - | . | gene_id | "XLOC_203640"; | transcript_id | "Novel_002752"; | exon_number | "4"; | gene_type | " |
| Dt_chr6 | Cufflinks | exon | 33573884 | 33575299 | . | - | . | gene_id | "XLOC_203640"; | transcript_id | "Novel_002752"; | exon_number | "5"; | gene_type | " |
| Dt_chr6 | Cufflinks | exon | 35854915 | 35855220 | . | - | . | gene_id | "XLOC_203750"; | transcript_id | "Novel_002753"; | exon_number | "1"; | gene_type | " |
| Dt_chr6 | Cufflinks | exon | 35856043 | 35856207 | . | - | . | gene_id | "XLOC_203750"; | transcript_id | "Novel_002753"; | exon_number | "2"; | gene_type | " |
| Dt_chr6 | Cufflinks | exon | 36800928 | 36801164 | . | - | . | gene_id | "XLOC_203822"; | transcript_id | "Novel_002754"; | exon_number | "1"; | gene_type | " |
| Dt_chr6 | Cufflinks | exon | 37716998 | 37717242 | . | - | . | gene_id | "XLOC_203890"; | transcript_id | "Novel_002755"; | exon_number | "1"; | gene_type | " |
| Dt_chr6 | Cufflinks | exon | 38025655 | 38028647 | . | - | . | gene_id | "XLOC_203902"; | transcript_id | "Novel_002756"; | exon_number | "1"; | gene_type | " |

|         |           |      |          |          |   |   |   |         |                |               |                 |             |      |           |   |
|---------|-----------|------|----------|----------|---|---|---|---------|----------------|---------------|-----------------|-------------|------|-----------|---|
| Dt_chr6 | Cufflinks | exon | 38029185 | 38029337 | . | - | . | gene_id | "XLOC_203902"; | transcript_id | "Novel_002756"; | exon_number | "2"; | gene_type | " |
| Dt_chr6 | Cufflinks | exon | 38026113 | 38028629 | . | - | . | gene_id | "XLOC_203902"; | transcript_id | "Novel_002757"; | exon_number | "1"; | gene_type | " |
| Dt_chr6 | Cufflinks | exon | 38029185 | 38029339 | . | - | . | gene_id | "XLOC_203902"; | transcript_id | "Novel_002757"; | exon_number | "2"; | gene_type | " |
| Dt_chr6 | Cufflinks | exon | 38412374 | 38412932 | . | - | . | gene_id | "XLOC_203925"; | transcript_id | "Novel_002758"; | exon_number | "1"; | gene_type | " |
| Dt_chr6 | Cufflinks | exon | 38414148 | 38414233 | . | - | . | gene_id | "XLOC_203925"; | transcript_id | "Novel_002758"; | exon_number | "2"; | gene_type | " |
| Dt_chr6 | Cufflinks | exon | 39975192 | 39975544 | . | - | . | gene_id | "XLOC_204017"; | transcript_id | "Novel_002759"; | exon_number | "1"; | gene_type | " |
| Dt_chr6 | Cufflinks | exon | 40800177 | 40804704 | . | - | . | gene_id | "XLOC_204074"; | transcript_id | "Novel_002760"; | exon_number | "1"; | gene_type | " |
| Dt_chr6 | Cufflinks | exon | 40804827 | 40804997 | . | - | . | gene_id | "XLOC_204074"; | transcript_id | "Novel_002760"; | exon_number | "2"; | gene_type | " |
| Dt_chr6 | Cufflinks | exon | 40969703 | 40970015 | . | - | . | gene_id | "XLOC_204088"; | transcript_id | "Novel_002761"; | exon_number | "1"; | gene_type | " |
| Dt_chr6 | Cufflinks | exon | 40970214 | 40970315 | . | - | . | gene_id | "XLOC_204088"; | transcript_id | "Novel_002761"; | exon_number | "2"; | gene_type | " |
| Dt_chr6 | Cufflinks | exon | 40970496 | 40970630 | . | - | . | gene_id | "XLOC_204088"; | transcript_id | "Novel_002761"; | exon_number | "3"; | gene_type | " |
| Dt_chr6 | Cufflinks | exon | 41742386 | 41742575 | . | - | . | gene_id | "XLOC_204199"; | transcript_id | "Novel_002762"; | exon_number | "1"; | gene_type | " |
| Dt_chr6 | Cufflinks | exon | 41743101 | 41743176 | . | - | . | gene_id | "XLOC_204199"; | transcript_id | "Novel_002762"; | exon_number | "2"; | gene_type | " |
| Dt_chr6 | Cufflinks | exon | 41743275 | 41743514 | . | - | . | gene_id | "XLOC_204199"; | transcript_id | "Novel_002762"; | exon_number | "3"; | gene_type | " |
| Dt_chr6 | Cufflinks | exon | 41783125 | 41783506 | . | - | . | gene_id | "XLOC_204201"; | transcript_id | "Novel_002763"; | exon_number | "1"; | gene_type | " |
| Dt_chr6 | Cufflinks | exon | 41783624 | 41783721 | . | - | . | gene_id | "XLOC_204201"; | transcript_id | "Novel_002763"; | exon_number | "2"; | gene_type | " |
| Dt_chr7 | Cufflinks | exon | 658766   | 658895   | . | + | . | gene_id | "XLOC_204586"; | transcript_id | "Novel_002764"; | exon_number | "1"; | gene_type | " |
| Dt_chr7 | Cufflinks | exon | 659024   | 659078   | . | + | . | gene_id | "XLOC_204586"; | transcript_id | "Novel_002764"; | exon_number | "2"; | gene_type | " |
| Dt_chr7 | Cufflinks | exon | 659227   | 659524   | . | + | . | gene_id | "XLOC_204586"; | transcript_id | "Novel_002764"; | exon_number | "3"; | gene_type | " |
| Dt_chr7 | Cufflinks | exon | 1683986  | 1684810  | . | + | . | gene_id | "XLOC_204654"; | transcript_id | "Novel_002765"; | exon_number | "1"; | gene_type | " |
| Dt_chr7 | Cufflinks | exon | 1684885  | 1685052  | . | + | . | gene_id | "XLOC_204654"; | transcript_id | "Novel_002765"; | exon_number | "2"; | gene_type | " |
| Dt_chr7 | Cufflinks | exon | 1685169  | 1685375  | . | + | . | gene_id | "XLOC_204654"; | transcript_id | "Novel_002765"; | exon_number | "3"; | gene_type | " |
| Dt_chr7 | Cufflinks | exon | 1685477  | 1686284  | . | + | . | gene_id | "XLOC_204654"; | transcript_id | "Novel_002765"; | exon_number | "4"; | gene_type | " |
| Dt_chr7 | Cufflinks | exon | 1686979  | 1687374  | . | + | . | gene_id | "XLOC_204655"; | transcript_id | "Novel_002766"; | exon_number | "1"; | gene_type | " |
| Dt_chr7 | Cufflinks | exon | 1687460  | 1687941  | . | + | . | gene_id | "XLOC_204655"; | transcript_id | "Novel_002766"; | exon_number | "2"; | gene_type | " |
| Dt_chr7 | Cufflinks | exon | 2549083  | 2549977  | . | + | . | gene_id | "XLOC_204798"; | transcript_id | "Novel_002767"; | exon_number | "1"; | gene_type | " |
| Dt_chr7 | Cufflinks | exon | 2550150  | 2550248  | . | + | . | gene_id | "XLOC_204798"; | transcript_id | "Novel_002767"; | exon_number | "2"; | gene_type | " |
| Dt_chr7 | Cufflinks | exon | 2550389  | 2550505  | . | + | . | gene_id | "XLOC_204798"; | transcript_id | "Novel_002767"; | exon_number | "3"; | gene_type | " |
| Dt_chr7 | Cufflinks | exon | 2550612  | 2550672  | . | + | . | gene_id | "XLOC_204798"; | transcript_id | "Novel_002767"; | exon_number | "4"; | gene_type | " |
| Dt_chr7 | Cufflinks | exon | 2551157  | 2551281  | . | + | . | gene_id | "XLOC_204798"; | transcript_id | "Novel_002767"; | exon_number | "5"; | gene_type | " |
| Dt_chr7 | Cufflinks | exon | 2551688  | 2552062  | . | + | . | gene_id | "XLOC_204798"; | transcript_id | "Novel_002767"; | exon_number | "6"; | gene_type | " |
| Dt_chr7 | Cufflinks | exon | 2754319  | 2754798  | . | + | . | gene_id | "XLOC_204811"; | transcript_id | "Novel_002768"; | exon_number | "1"; | gene_type | " |
| Dt_chr7 | Cufflinks | exon | 2754997  | 2755438  | . | + | . | gene_id | "XLOC_204811"; | transcript_id | "Novel_002768"; | exon_number | "2"; | gene_type | " |
| Dt_chr7 | Cufflinks | exon | 2946875  | 2947130  | . | + | . | gene_id | "XLOC_204849"; | transcript_id | "Novel_002769"; | exon_number | "1"; | gene_type | " |
| Dt_chr7 | Cufflinks | exon | 2947899  | 2948039  | . | + | . | gene_id | "XLOC_204849"; | transcript_id | "Novel_002769"; | exon_number | "2"; | gene_type | " |



|         |           |      |         |         |   |   |   |         |                |               |                 |             |      |           |   |
|---------|-----------|------|---------|---------|---|---|---|---------|----------------|---------------|-----------------|-------------|------|-----------|---|
| Dt_chr7 | Cufflinks | exon | 3191361 | 3191467 | . | + | . | gene_id | "XLOC_204897"; | transcript_id | "Novel_002774"; | exon_number | "4"; | gene_type | " |
| Dt_chr7 | Cufflinks | exon | 3191572 | 3191727 | . | + | . | gene_id | "XLOC_204897"; | transcript_id | "Novel_002774"; | exon_number | "5"; | gene_type | " |
| Dt_chr7 | Cufflinks | exon | 3191938 | 3192024 | . | + | . | gene_id | "XLOC_204897"; | transcript_id | "Novel_002774"; | exon_number | "6"; | gene_type | " |
| Dt_chr7 | Cufflinks | exon | 3192266 | 3192363 | . | + | . | gene_id | "XLOC_204897"; | transcript_id | "Novel_002774"; | exon_number | "7"; | gene_type | " |
| Dt_chr7 | Cufflinks | exon | 3193574 | 3193661 | . | + | . | gene_id | "XLOC_204897"; | transcript_id | "Novel_002774"; | exon_number | "8"; | gene_type | " |
| Dt_chr7 | Cufflinks | exon | 3194419 | 3194744 | . | + | . | gene_id | "XLOC_204897"; | transcript_id | "Novel_002774"; | exon_number | "9"; | gene_type | " |
| Dt_chr7 | Cufflinks | exon | 3190562 | 3191071 | . | + | . | gene_id | "XLOC_204897"; | transcript_id | "Novel_002775"; | exon_number | "1"; | gene_type | " |
| Dt_chr7 | Cufflinks | exon | 3191160 | 3191245 | . | + | . | gene_id | "XLOC_204897"; | transcript_id | "Novel_002775"; | exon_number | "2"; | gene_type | " |
| Dt_chr7 | Cufflinks | exon | 3191361 | 3191594 | . | + | . | gene_id | "XLOC_204897"; | transcript_id | "Novel_002775"; | exon_number | "3"; | gene_type | " |
| Dt_chr7 | Cufflinks | exon | 3191783 | 3192024 | . | + | . | gene_id | "XLOC_204897"; | transcript_id | "Novel_002776"; | exon_number | "1"; | gene_type | " |
| Dt_chr7 | Cufflinks | exon | 3192266 | 3192363 | . | + | . | gene_id | "XLOC_204897"; | transcript_id | "Novel_002776"; | exon_number | "2"; | gene_type | " |
| Dt_chr7 | Cufflinks | exon | 3193574 | 3193661 | . | + | . | gene_id | "XLOC_204897"; | transcript_id | "Novel_002776"; | exon_number | "3"; | gene_type | " |
| Dt_chr7 | Cufflinks | exon | 3194419 | 3194920 | . | + | . | gene_id | "XLOC_204897"; | transcript_id | "Novel_002776"; | exon_number | "4"; | gene_type | " |
| Dt_chr7 | Cufflinks | exon | 3191984 | 3192363 | . | + | . | gene_id | "XLOC_204897"; | transcript_id | "Novel_002777"; | exon_number | "1"; | gene_type | " |
| Dt_chr7 | Cufflinks | exon | 3193574 | 3193661 | . | + | . | gene_id | "XLOC_204897"; | transcript_id | "Novel_002777"; | exon_number | "2"; | gene_type | " |
| Dt_chr7 | Cufflinks | exon | 3194419 | 3194850 | . | + | . | gene_id | "XLOC_204897"; | transcript_id | "Novel_002777"; | exon_number | "3"; | gene_type | " |
| Dt_chr7 | Cufflinks | exon | 3416686 | 3417375 | . | + | . | gene_id | "XLOC_204956"; | transcript_id | "Novel_002778"; | exon_number | "1"; | gene_type | " |
| Dt_chr7 | Cufflinks | exon | 3417685 | 3417802 | . | + | . | gene_id | "XLOC_204956"; | transcript_id | "Novel_002778"; | exon_number | "2"; | gene_type | " |
| Dt_chr7 | Cufflinks | exon | 3418094 | 3418314 | . | + | . | gene_id | "XLOC_204956"; | transcript_id | "Novel_002778"; | exon_number | "3"; | gene_type | " |
| Dt_chr7 | Cufflinks | exon | 3418917 | 3419141 | . | + | . | gene_id | "XLOC_204956"; | transcript_id | "Novel_002778"; | exon_number | "4"; | gene_type | " |
| Dt_chr7 | Cufflinks | exon | 3419242 | 3419380 | . | + | . | gene_id | "XLOC_204956"; | transcript_id | "Novel_002778"; | exon_number | "5"; | gene_type | " |
| Dt_chr7 | Cufflinks | exon | 3419482 | 3420288 | . | + | . | gene_id | "XLOC_204956"; | transcript_id | "Novel_002778"; | exon_number | "6"; | gene_type | " |
| Dt_chr7 | Cufflinks | exon | 3416691 | 3417375 | . | + | . | gene_id | "XLOC_204956"; | transcript_id | "Novel_002779"; | exon_number | "1"; | gene_type | " |
| Dt_chr7 | Cufflinks | exon | 3417685 | 3417802 | . | + | . | gene_id | "XLOC_204956"; | transcript_id | "Novel_002779"; | exon_number | "2"; | gene_type | " |
| Dt_chr7 | Cufflinks | exon | 3418094 | 3418314 | . | + | . | gene_id | "XLOC_204956"; | transcript_id | "Novel_002779"; | exon_number | "3"; | gene_type | " |
| Dt_chr7 | Cufflinks | exon | 3418917 | 3419368 | . | + | . | gene_id | "XLOC_204956"; | transcript_id | "Novel_002779"; | exon_number | "4"; | gene_type | " |
| Dt_chr7 | Cufflinks | exon | 3524532 | 3524585 | . | + | . | gene_id | "XLOC_204984"; | transcript_id | "Novel_002780"; | exon_number | "1"; | gene_type | " |
| Dt_chr7 | Cufflinks | exon | 3525612 | 3526625 | . | + | . | gene_id | "XLOC_204984"; | transcript_id | "Novel_002780"; | exon_number | "2"; | gene_type | " |
| Dt_chr7 | Cufflinks | exon | 3602776 | 3602993 | . | + | . | gene_id | "XLOC_205010"; | transcript_id | "Novel_002781"; | exon_number | "1"; | gene_type | " |
| Dt_chr7 | Cufflinks | exon | 3603423 | 3604272 | . | + | . | gene_id | "XLOC_205010"; | transcript_id | "Novel_002781"; | exon_number | "2"; | gene_type | " |
| Dt_chr7 | Cufflinks | exon | 3604371 | 3604540 | . | + | . | gene_id | "XLOC_205010"; | transcript_id | "Novel_002781"; | exon_number | "3"; | gene_type | " |
| Dt_chr7 | Cufflinks | exon | 3604792 | 3604848 | . | + | . | gene_id | "XLOC_205010"; | transcript_id | "Novel_002781"; | exon_number | "4"; | gene_type | " |
| Dt_chr7 | Cufflinks | exon | 3602808 | 3602993 | . | + | . | gene_id | "XLOC_205010"; | transcript_id | "Novel_002782"; | exon_number | "1"; | gene_type | " |
| Dt_chr7 | Cufflinks | exon | 3603423 | 3604272 | . | + | . | gene_id | "XLOC_205010"; | transcript_id | "Novel_002782"; | exon_number | "2"; | gene_type | " |
| Dt_chr7 | Cufflinks | exon | 3604371 | 3604540 | . | + | . | gene_id | "XLOC_205010"; | transcript_id | "Novel_002782"; | exon_number | "3"; | gene_type | " |



|         |           |      |         |         |   |   |   |         |                |               |                 |             |      |           |   |
|---------|-----------|------|---------|---------|---|---|---|---------|----------------|---------------|-----------------|-------------|------|-----------|---|
| Dt_chr7 | Cufflinks | exon | 3604772 | 3604860 | . | + | . | gene_id | "XLOC_205010"; | transcript_id | "Novel_002782"; | exon_number | "4"; | gene_type | " |
| Dt_chr7 | Cufflinks | exon | 3602876 | 3602993 | . | + | . | gene_id | "XLOC_205010"; | transcript_id | "Novel_002783"; | exon_number | "1"; | gene_type | " |
| Dt_chr7 | Cufflinks | exon | 3603426 | 3604272 | . | + | . | gene_id | "XLOC_205010"; | transcript_id | "Novel_002783"; | exon_number | "2"; | gene_type | " |
| Dt_chr7 | Cufflinks | exon | 3604371 | 3604540 | . | + | . | gene_id | "XLOC_205010"; | transcript_id | "Novel_002783"; | exon_number | "3"; | gene_type | " |
| Dt_chr7 | Cufflinks | exon | 3604792 | 3604877 | . | + | . | gene_id | "XLOC_205010"; | transcript_id | "Novel_002783"; | exon_number | "4"; | gene_type | " |
| Dt_chr7 | Cufflinks | exon | 3605016 | 3605065 | . | + | . | gene_id | "XLOC_205010"; | transcript_id | "Novel_002783"; | exon_number | "5"; | gene_type | " |
| Dt_chr7 | Cufflinks | exon | 3605338 | 3605405 | . | + | . | gene_id | "XLOC_205010"; | transcript_id | "Novel_002783"; | exon_number | "6"; | gene_type | " |
| Dt_chr7 | Cufflinks | exon | 3605994 | 3606078 | . | + | . | gene_id | "XLOC_205010"; | transcript_id | "Novel_002783"; | exon_number | "7"; | gene_type | " |
| Dt_chr7 | Cufflinks | exon | 3780894 | 3781259 | . | + | . | gene_id | "XLOC_205045"; | transcript_id | "Novel_002784"; | exon_number | "1"; | gene_type | " |
| Dt_chr7 | Cufflinks | exon | 3782149 | 3783314 | . | + | . | gene_id | "XLOC_205045"; | transcript_id | "Novel_002784"; | exon_number | "2"; | gene_type | " |
| Dt_chr7 | Cufflinks | exon | 3930351 | 3930515 | . | + | . | gene_id | "XLOC_205069"; | transcript_id | "Novel_002785"; | exon_number | "1"; | gene_type | " |
| Dt_chr7 | Cufflinks | exon | 3931170 | 3931750 | . | + | . | gene_id | "XLOC_205069"; | transcript_id | "Novel_002785"; | exon_number | "2"; | gene_type | " |
| Dt_chr7 | Cufflinks | exon | 3931934 | 3932034 | . | + | . | gene_id | "XLOC_205069"; | transcript_id | "Novel_002785"; | exon_number | "3"; | gene_type | " |
| Dt_chr7 | Cufflinks | exon | 3932428 | 3932511 | . | + | . | gene_id | "XLOC_205069"; | transcript_id | "Novel_002785"; | exon_number | "4"; | gene_type | " |
| Dt_chr7 | Cufflinks | exon | 3932611 | 3932721 | . | + | . | gene_id | "XLOC_205069"; | transcript_id | "Novel_002785"; | exon_number | "5"; | gene_type | " |
| Dt_chr7 | Cufflinks | exon | 3932840 | 3933203 | . | + | . | gene_id | "XLOC_205069"; | transcript_id | "Novel_002785"; | exon_number | "6"; | gene_type | " |
| Dt_chr7 | Cufflinks | exon | 3933979 | 3934283 | . | + | . | gene_id | "XLOC_205072"; | transcript_id | "Novel_002786"; | exon_number | "1"; | gene_type | " |
| Dt_chr7 | Cufflinks | exon | 3934364 | 3934421 | . | + | . | gene_id | "XLOC_205072"; | transcript_id | "Novel_002786"; | exon_number | "2"; | gene_type | " |
| Dt_chr7 | Cufflinks | exon | 3934745 | 3934812 | . | + | . | gene_id | "XLOC_205072"; | transcript_id | "Novel_002786"; | exon_number | "3"; | gene_type | " |
| Dt_chr7 | Cufflinks | exon | 3934912 | 3935091 | . | + | . | gene_id | "XLOC_205072"; | transcript_id | "Novel_002786"; | exon_number | "4"; | gene_type | " |
| Dt_chr7 | Cufflinks | exon | 3935316 | 3935412 | . | + | . | gene_id | "XLOC_205072"; | transcript_id | "Novel_002786"; | exon_number | "5"; | gene_type | " |
| Dt_chr7 | Cufflinks | exon | 3936155 | 3936264 | . | + | . | gene_id | "XLOC_205072"; | transcript_id | "Novel_002786"; | exon_number | "6"; | gene_type | " |
| Dt_chr7 | Cufflinks | exon | 3936355 | 3936488 | . | + | . | gene_id | "XLOC_205072"; | transcript_id | "Novel_002786"; | exon_number | "7"; | gene_type | " |
| Dt_chr7 | Cufflinks | exon | 3936570 | 3936751 | . | + | . | gene_id | "XLOC_205072"; | transcript_id | "Novel_002786"; | exon_number | "8"; | gene_type | " |
| Dt_chr7 | Cufflinks | exon | 3937011 | 3937442 | . | + | . | gene_id | "XLOC_205072"; | transcript_id | "Novel_002786"; | exon_number | "9"; | gene_type | " |
| Dt_chr7 | Cufflinks | exon | 3934287 | 3934421 | . | + | . | gene_id | "XLOC_205072"; | transcript_id | "Novel_002787"; | exon_number | "1"; | gene_type | " |
| Dt_chr7 | Cufflinks | exon | 3934745 | 3934812 | . | + | . | gene_id | "XLOC_205072"; | transcript_id | "Novel_002787"; | exon_number | "2"; | gene_type | " |
| Dt_chr7 | Cufflinks | exon | 3934912 | 3935091 | . | + | . | gene_id | "XLOC_205072"; | transcript_id | "Novel_002787"; | exon_number | "3"; | gene_type | " |
| Dt_chr7 | Cufflinks | exon | 3935312 | 3935395 | . | + | . | gene_id | "XLOC_205072"; | transcript_id | "Novel_002787"; | exon_number | "4"; | gene_type | " |
| Dt_chr7 | Cufflinks | exon | 3935171 | 3935412 | . | + | . | gene_id | "XLOC_205072"; | transcript_id | "Novel_002788"; | exon_number | "1"; | gene_type | " |
| Dt_chr7 | Cufflinks | exon | 3936155 | 3936264 | . | + | . | gene_id | "XLOC_205072"; | transcript_id | "Novel_002788"; | exon_number | "2"; | gene_type | " |
| Dt_chr7 | Cufflinks | exon | 3936355 | 3936488 | . | + | . | gene_id | "XLOC_205072"; | transcript_id | "Novel_002788"; | exon_number | "3"; | gene_type | " |
| Dt_chr7 | Cufflinks | exon | 3936570 | 3936751 | . | + | . | gene_id | "XLOC_205072"; | transcript_id | "Novel_002788"; | exon_number | "4"; | gene_type | " |
| Dt_chr7 | Cufflinks | exon | 3937011 | 3937307 | . | + | . | gene_id | "XLOC_205072"; | transcript_id | "Novel_002788"; | exon_number | "5"; | gene_type | " |
| Dt_chr7 | Cufflinks | exon | 4149028 | 4149829 | . | + | . | gene_id | "XLOC_205115"; | transcript_id | "Novel_002789"; | exon_number | "1"; | gene_type | " |

|         |           |      |         |         |   |   |   |         |                |               |                 |             |      |           |   |
|---------|-----------|------|---------|---------|---|---|---|---------|----------------|---------------|-----------------|-------------|------|-----------|---|
| Dt_chr7 | Cufflinks | exon | 4149930 | 4151533 | . | + | . | gene_id | "XLOC_205115"; | transcript_id | "Novel_002789"; | exon_number | "2"; | gene_type | " |
| Dt_chr7 | Cufflinks | exon | 4210559 | 4211534 | . | + | . | gene_id | "XLOC_205129"; | transcript_id | "Novel_002790"; | exon_number | "1"; | gene_type | " |
| Dt_chr7 | Cufflinks | exon | 4253961 | 4254260 | . | + | . | gene_id | "XLOC_205135"; | transcript_id | "Novel_002791"; | exon_number | "1"; | gene_type | " |
| Dt_chr7 | Cufflinks | exon | 4254364 | 4254421 | . | + | . | gene_id | "XLOC_205135"; | transcript_id | "Novel_002791"; | exon_number | "2"; | gene_type | " |
| Dt_chr7 | Cufflinks | exon | 4254516 | 4254620 | . | + | . | gene_id | "XLOC_205135"; | transcript_id | "Novel_002791"; | exon_number | "3"; | gene_type | " |
| Dt_chr7 | Cufflinks | exon | 4255262 | 4255319 | . | + | . | gene_id | "XLOC_205135"; | transcript_id | "Novel_002791"; | exon_number | "4"; | gene_type | " |
| Dt_chr7 | Cufflinks | exon | 4255415 | 4255590 | . | + | . | gene_id | "XLOC_205135"; | transcript_id | "Novel_002791"; | exon_number | "5"; | gene_type | " |
| Dt_chr7 | Cufflinks | exon | 4255716 | 4255776 | . | + | . | gene_id | "XLOC_205135"; | transcript_id | "Novel_002791"; | exon_number | "6"; | gene_type | " |
| Dt_chr7 | Cufflinks | exon | 4256139 | 4256906 | . | + | . | gene_id | "XLOC_205135"; | transcript_id | "Novel_002791"; | exon_number | "7"; | gene_type | " |
| Dt_chr7 | Cufflinks | exon | 4253998 | 4254260 | . | + | . | gene_id | "XLOC_205135"; | transcript_id | "Novel_002792"; | exon_number | "1"; | gene_type | " |
| Dt_chr7 | Cufflinks | exon | 4254364 | 4254421 | . | + | . | gene_id | "XLOC_205135"; | transcript_id | "Novel_002792"; | exon_number | "2"; | gene_type | " |
| Dt_chr7 | Cufflinks | exon | 4254516 | 4255359 | . | + | . | gene_id | "XLOC_205135"; | transcript_id | "Novel_002792"; | exon_number | "3"; | gene_type | " |
| Dt_chr7 | Cufflinks | exon | 4269509 | 4269672 | . | + | . | gene_id | "XLOC_205137"; | transcript_id | "Novel_002793"; | exon_number | "1"; | gene_type | " |
| Dt_chr7 | Cufflinks | exon | 4269786 | 4269959 | . | + | . | gene_id | "XLOC_205137"; | transcript_id | "Novel_002793"; | exon_number | "2"; | gene_type | " |
| Dt_chr7 | Cufflinks | exon | 4270057 | 4270327 | . | + | . | gene_id | "XLOC_205137"; | transcript_id | "Novel_002793"; | exon_number | "3"; | gene_type | " |
| Dt_chr7 | Cufflinks | exon | 4270984 | 4270998 | . | + | . | gene_id | "XLOC_205137"; | transcript_id | "Novel_002793"; | exon_number | "4"; | gene_type | " |
| Dt_chr7 | Cufflinks | exon | 4269645 | 4269959 | . | + | . | gene_id | "XLOC_205137"; | transcript_id | "Novel_002794"; | exon_number | "1"; | gene_type | " |
| Dt_chr7 | Cufflinks | exon | 4270057 | 4270327 | . | + | . | gene_id | "XLOC_205137"; | transcript_id | "Novel_002794"; | exon_number | "2"; | gene_type | " |
| Dt_chr7 | Cufflinks | exon | 4270984 | 4271131 | . | + | . | gene_id | "XLOC_205137"; | transcript_id | "Novel_002794"; | exon_number | "3"; | gene_type | " |
| Dt_chr7 | Cufflinks | exon | 4283378 | 4283596 | . | + | . | gene_id | "XLOC_205139"; | transcript_id | "Novel_002795"; | exon_number | "1"; | gene_type | " |
| Dt_chr7 | Cufflinks | exon | 4303573 | 4303576 | . | + | . | gene_id | "XLOC_205142"; | transcript_id | "Novel_002796"; | exon_number | "1"; | gene_type | " |
| Dt_chr7 | Cufflinks | exon | 4303848 | 4303946 | . | + | . | gene_id | "XLOC_205142"; | transcript_id | "Novel_002796"; | exon_number | "2"; | gene_type | " |
| Dt_chr7 | Cufflinks | exon | 4324105 | 4324293 | . | + | . | gene_id | "XLOC_205142"; | transcript_id | "Novel_002796"; | exon_number | "3"; | gene_type | " |
| Dt_chr7 | Cufflinks | exon | 4324438 | 4324516 | . | + | . | gene_id | "XLOC_205142"; | transcript_id | "Novel_002796"; | exon_number | "4"; | gene_type | " |
| Dt_chr7 | Cufflinks | exon | 4324590 | 4325015 | . | + | . | gene_id | "XLOC_205142"; | transcript_id | "Novel_002796"; | exon_number | "5"; | gene_type | " |
| Dt_chr7 | Cufflinks | exon | 4350156 | 4350386 | . | + | . | gene_id | "XLOC_205146"; | transcript_id | "Novel_002797"; | exon_number | "1"; | gene_type | " |
| Dt_chr7 | Cufflinks | exon | 4350614 | 4351221 | . | + | . | gene_id | "XLOC_205146"; | transcript_id | "Novel_002797"; | exon_number | "2"; | gene_type | " |
| Dt_chr7 | Cufflinks | exon | 4351313 | 4351921 | . | + | . | gene_id | "XLOC_205146"; | transcript_id | "Novel_002797"; | exon_number | "3"; | gene_type | " |
| Dt_chr7 | Cufflinks | exon | 4390547 | 4391354 | . | + | . | gene_id | "XLOC_205158"; | transcript_id | "Novel_002798"; | exon_number | "1"; | gene_type | " |
| Dt_chr7 | Cufflinks | exon | 4537989 | 4538418 | . | + | . | gene_id | "XLOC_205183"; | transcript_id | "Novel_002799"; | exon_number | "1"; | gene_type | " |
| Dt_chr7 | Cufflinks | exon | 4538543 | 4539145 | . | + | . | gene_id | "XLOC_205183"; | transcript_id | "Novel_002799"; | exon_number | "2"; | gene_type | " |
| Dt_chr7 | Cufflinks | exon | 4539227 | 4539369 | . | + | . | gene_id | "XLOC_205183"; | transcript_id | "Novel_002799"; | exon_number | "3"; | gene_type | " |
| Dt_chr7 | Cufflinks | exon | 4539703 | 4540319 | . | + | . | gene_id | "XLOC_205183"; | transcript_id | "Novel_002799"; | exon_number | "4"; | gene_type | " |
| Dt_chr7 | Cufflinks | exon | 4538058 | 4538418 | . | + | . | gene_id | "XLOC_205183"; | transcript_id | "Novel_002800"; | exon_number | "1"; | gene_type | " |
| Dt_chr7 | Cufflinks | exon | 4538491 | 4538512 | . | + | . | gene_id | "XLOC_205183"; | transcript_id | "Novel_002800"; | exon_number | "2"; | gene_type | " |

|         |           |      |         |         |   |   |   |         |                |               |                 |             |       |           |   |
|---------|-----------|------|---------|---------|---|---|---|---------|----------------|---------------|-----------------|-------------|-------|-----------|---|
| Dt_chr7 | Cufflinks | exon | 4594558 | 4595065 | . | + | . | gene_id | "XLOC_205192"; | transcript_id | "Novel_002801"; | exon_number | "1";  | gene_type | " |
| Dt_chr7 | Cufflinks | exon | 4595757 | 4596905 | . | + | . | gene_id | "XLOC_205192"; | transcript_id | "Novel_002801"; | exon_number | "2";  | gene_type | " |
| Dt_chr7 | Cufflinks | exon | 4604784 | 4605320 | . | + | . | gene_id | "XLOC_205192"; | transcript_id | "Novel_002802"; | exon_number | "1";  | gene_type | " |
| Dt_chr7 | Cufflinks | exon | 4606005 | 4607055 | . | + | . | gene_id | "XLOC_205192"; | transcript_id | "Novel_002802"; | exon_number | "2";  | gene_type | " |
| Dt_chr7 | Cufflinks | exon | 4729771 | 4730405 | . | + | . | gene_id | "XLOC_205218"; | transcript_id | "Novel_002803"; | exon_number | "1";  | gene_type | " |
| Dt_chr7 | Cufflinks | exon | 4731652 | 4731706 | . | + | . | gene_id | "XLOC_205218"; | transcript_id | "Novel_002803"; | exon_number | "2";  | gene_type | " |
| Dt_chr7 | Cufflinks | exon | 4731823 | 4731946 | . | + | . | gene_id | "XLOC_205218"; | transcript_id | "Novel_002803"; | exon_number | "3";  | gene_type | " |
| Dt_chr7 | Cufflinks | exon | 4732188 | 4732284 | . | + | . | gene_id | "XLOC_205218"; | transcript_id | "Novel_002803"; | exon_number | "4";  | gene_type | " |
| Dt_chr7 | Cufflinks | exon | 4732365 | 4732401 | . | + | . | gene_id | "XLOC_205218"; | transcript_id | "Novel_002803"; | exon_number | "5";  | gene_type | " |
| Dt_chr7 | Cufflinks | exon | 4732492 | 4732596 | . | + | . | gene_id | "XLOC_205218"; | transcript_id | "Novel_002803"; | exon_number | "6";  | gene_type | " |
| Dt_chr7 | Cufflinks | exon | 4732681 | 4732738 | . | + | . | gene_id | "XLOC_205218"; | transcript_id | "Novel_002803"; | exon_number | "7";  | gene_type | " |
| Dt_chr7 | Cufflinks | exon | 4733483 | 4733602 | . | + | . | gene_id | "XLOC_205218"; | transcript_id | "Novel_002803"; | exon_number | "8";  | gene_type | " |
| Dt_chr7 | Cufflinks | exon | 4733918 | 4733980 | . | + | . | gene_id | "XLOC_205218"; | transcript_id | "Novel_002803"; | exon_number | "9";  | gene_type | " |
| Dt_chr7 | Cufflinks | exon | 4734306 | 4734424 | . | + | . | gene_id | "XLOC_205218"; | transcript_id | "Novel_002803"; | exon_number | "10"; | gene_type | " |
| Dt_chr7 | Cufflinks | exon | 4734520 | 4734647 | . | + | . | gene_id | "XLOC_205218"; | transcript_id | "Novel_002803"; | exon_number | "11"; | gene_type | " |
| Dt_chr7 | Cufflinks | exon | 4734768 | 4735763 | . | + | . | gene_id | "XLOC_205218"; | transcript_id | "Novel_002803"; | exon_number | "12"; | gene_type | " |
| Dt_chr7 | Cufflinks | exon | 4735841 | 4735971 | . | + | . | gene_id | "XLOC_205218"; | transcript_id | "Novel_002803"; | exon_number | "13"; | gene_type | " |
| Dt_chr7 | Cufflinks | exon | 4736437 | 4736510 | . | + | . | gene_id | "XLOC_205218"; | transcript_id | "Novel_002803"; | exon_number | "14"; | gene_type | " |
| Dt_chr7 | Cufflinks | exon | 4736638 | 4736805 | . | + | . | gene_id | "XLOC_205218"; | transcript_id | "Novel_002803"; | exon_number | "15"; | gene_type | " |
| Dt_chr7 | Cufflinks | exon | 4737440 | 4737568 | . | + | . | gene_id | "XLOC_205218"; | transcript_id | "Novel_002803"; | exon_number | "16"; | gene_type | " |
| Dt_chr7 | Cufflinks | exon | 4737650 | 4737932 | . | + | . | gene_id | "XLOC_205218"; | transcript_id | "Novel_002803"; | exon_number | "17"; | gene_type | " |
| Dt_chr7 | Cufflinks | exon | 4738200 | 4738438 | . | + | . | gene_id | "XLOC_205218"; | transcript_id | "Novel_002803"; | exon_number | "18"; | gene_type | " |
| Dt_chr7 | Cufflinks | exon | 4738554 | 4739672 | . | + | . | gene_id | "XLOC_205218"; | transcript_id | "Novel_002803"; | exon_number | "19"; | gene_type | " |
| Dt_chr7 | Cufflinks | exon | 4789816 | 4790032 | . | + | . | gene_id | "XLOC_205239"; | transcript_id | "Novel_002804"; | exon_number | "1";  | gene_type | " |
| Dt_chr7 | Cufflinks | exon | 4790182 | 4791021 | . | + | . | gene_id | "XLOC_205239"; | transcript_id | "Novel_002804"; | exon_number | "2";  | gene_type | " |
| Dt_chr7 | Cufflinks | exon | 4831873 | 4832394 | . | + | . | gene_id | "XLOC_205245"; | transcript_id | "Novel_002805"; | exon_number | "1";  | gene_type | " |
| Dt_chr7 | Cufflinks | exon | 4832475 | 4833168 | . | + | . | gene_id | "XLOC_205245"; | transcript_id | "Novel_002805"; | exon_number | "2";  | gene_type | " |
| Dt_chr7 | Cufflinks | exon | 4833266 | 4833477 | . | + | . | gene_id | "XLOC_205245"; | transcript_id | "Novel_002805"; | exon_number | "3";  | gene_type | " |
| Dt_chr7 | Cufflinks | exon | 4840048 | 4840625 | . | + | . | gene_id | "XLOC_205245"; | transcript_id | "Novel_002806"; | exon_number | "1";  | gene_type | " |
| Dt_chr7 | Cufflinks | exon | 4840999 | 4841864 | . | + | . | gene_id | "XLOC_205245"; | transcript_id | "Novel_002806"; | exon_number | "2";  | gene_type | " |
| Dt_chr7 | Cufflinks | exon | 4908879 | 4909405 | . | + | . | gene_id | "XLOC_205253"; | transcript_id | "Novel_002807"; | exon_number | "1";  | gene_type | " |
| Dt_chr7 | Cufflinks | exon | 4910062 | 4910137 | . | + | . | gene_id | "XLOC_205253"; | transcript_id | "Novel_002807"; | exon_number | "2";  | gene_type | " |
| Dt_chr7 | Cufflinks | exon | 4910472 | 4910560 | . | + | . | gene_id | "XLOC_205253"; | transcript_id | "Novel_002807"; | exon_number | "3";  | gene_type | " |
| Dt_chr7 | Cufflinks | exon | 4910875 | 4910964 | . | + | . | gene_id | "XLOC_205253"; | transcript_id | "Novel_002807"; | exon_number | "4";  | gene_type | " |
| Dt_chr7 | Cufflinks | exon | 4911605 | 4911649 | . | + | . | gene_id | "XLOC_205253"; | transcript_id | "Novel_002807"; | exon_number | "5";  | gene_type | " |



|         |           |      |         |         |   |   |   |         |                |               |                 |             |      |           |   |
|---------|-----------|------|---------|---------|---|---|---|---------|----------------|---------------|-----------------|-------------|------|-----------|---|
| Dt_chr7 | Cufflinks | exon | 5069526 | 5069670 | . | + | . | gene_id | "XLOC_205270"; | transcript_id | "Novel_002815"; | exon_number | "3"; | gene_type | " |
| Dt_chr7 | Cufflinks | exon | 5072178 | 5072643 | . | + | . | gene_id | "XLOC_205270"; | transcript_id | "Novel_002815"; | exon_number | "4"; | gene_type | " |
| Dt_chr7 | Cufflinks | exon | 5107621 | 5107654 | . | + | . | gene_id | "XLOC_205276"; | transcript_id | "Novel_002816"; | exon_number | "1"; | gene_type | " |
| Dt_chr7 | Cufflinks | exon | 5107734 | 5107862 | . | + | . | gene_id | "XLOC_205276"; | transcript_id | "Novel_002816"; | exon_number | "2"; | gene_type | " |
| Dt_chr7 | Cufflinks | exon | 5107995 | 5108234 | . | + | . | gene_id | "XLOC_205276"; | transcript_id | "Novel_002816"; | exon_number | "3"; | gene_type | " |
| Dt_chr7 | Cufflinks | exon | 5108312 | 5108444 | . | + | . | gene_id | "XLOC_205276"; | transcript_id | "Novel_002816"; | exon_number | "4"; | gene_type | " |
| Dt_chr7 | Cufflinks | exon | 5123339 | 5123991 | . | + | . | gene_id | "XLOC_205281"; | transcript_id | "Novel_002817"; | exon_number | "1"; | gene_type | " |
| Dt_chr7 | Cufflinks | exon | 5124089 | 5124782 | . | + | . | gene_id | "XLOC_205281"; | transcript_id | "Novel_002817"; | exon_number | "2"; | gene_type | " |
| Dt_chr7 | Cufflinks | exon | 5124912 | 5125007 | . | + | . | gene_id | "XLOC_205281"; | transcript_id | "Novel_002817"; | exon_number | "3"; | gene_type | " |
| Dt_chr7 | Cufflinks | exon | 5125128 | 5125193 | . | + | . | gene_id | "XLOC_205281"; | transcript_id | "Novel_002817"; | exon_number | "4"; | gene_type | " |
| Dt_chr7 | Cufflinks | exon | 5126667 | 5127041 | . | + | . | gene_id | "XLOC_205281"; | transcript_id | "Novel_002817"; | exon_number | "5"; | gene_type | " |
| Dt_chr7 | Cufflinks | exon | 5127121 | 5127625 | . | + | . | gene_id | "XLOC_205281"; | transcript_id | "Novel_002817"; | exon_number | "6"; | gene_type | " |
| Dt_chr7 | Cufflinks | exon | 5124903 | 5125007 | . | + | . | gene_id | "XLOC_205281"; | transcript_id | "Novel_002818"; | exon_number | "1"; | gene_type | " |
| Dt_chr7 | Cufflinks | exon | 5125128 | 5125193 | . | + | . | gene_id | "XLOC_205281"; | transcript_id | "Novel_002818"; | exon_number | "2"; | gene_type | " |
| Dt_chr7 | Cufflinks | exon | 5126667 | 5127041 | . | + | . | gene_id | "XLOC_205281"; | transcript_id | "Novel_002818"; | exon_number | "3"; | gene_type | " |
| Dt_chr7 | Cufflinks | exon | 5127121 | 5127625 | . | + | . | gene_id | "XLOC_205281"; | transcript_id | "Novel_002818"; | exon_number | "4"; | gene_type | " |
| Dt_chr7 | Cufflinks | exon | 5157449 | 5157487 | . | + | . | gene_id | "XLOC_205291"; | transcript_id | "Novel_002819"; | exon_number | "1"; | gene_type | " |
| Dt_chr7 | Cufflinks | exon | 5157894 | 5158439 | . | + | . | gene_id | "XLOC_205291"; | transcript_id | "Novel_002819"; | exon_number | "2"; | gene_type | " |
| Dt_chr7 | Cufflinks | exon | 5158536 | 5158619 | . | + | . | gene_id | "XLOC_205291"; | transcript_id | "Novel_002819"; | exon_number | "3"; | gene_type | " |
| Dt_chr7 | Cufflinks | exon | 5158726 | 5159390 | . | + | . | gene_id | "XLOC_205291"; | transcript_id | "Novel_002819"; | exon_number | "4"; | gene_type | " |
| Dt_chr7 | Cufflinks | exon | 5157789 | 5158439 | . | + | . | gene_id | "XLOC_205291"; | transcript_id | "Novel_002820"; | exon_number | "1"; | gene_type | " |
| Dt_chr7 | Cufflinks | exon | 5158536 | 5158665 | . | + | . | gene_id | "XLOC_205291"; | transcript_id | "Novel_002820"; | exon_number | "2"; | gene_type | " |
| Dt_chr7 | Cufflinks | exon | 5161586 | 5161980 | . | + | . | gene_id | "XLOC_205292"; | transcript_id | "Novel_002821"; | exon_number | "1"; | gene_type | " |
| Dt_chr7 | Cufflinks | exon | 5162079 | 5162342 | . | + | . | gene_id | "XLOC_205292"; | transcript_id | "Novel_002821"; | exon_number | "2"; | gene_type | " |
| Dt_chr7 | Cufflinks | exon | 5162710 | 5163006 | . | + | . | gene_id | "XLOC_205292"; | transcript_id | "Novel_002821"; | exon_number | "3"; | gene_type | " |
| Dt_chr7 | Cufflinks | exon | 5161955 | 5162829 | . | + | . | gene_id | "XLOC_205292"; | transcript_id | "Novel_002822"; | exon_number | "1"; | gene_type | " |
| Dt_chr7 | Cufflinks | exon | 5163467 | 5163526 | . | + | . | gene_id | "XLOC_205292"; | transcript_id | "Novel_002822"; | exon_number | "2"; | gene_type | " |
| Dt_chr7 | Cufflinks | exon | 5164887 | 5164927 | . | + | . | gene_id | "XLOC_205292"; | transcript_id | "Novel_002822"; | exon_number | "3"; | gene_type | " |
| Dt_chr7 | Cufflinks | exon | 5165049 | 5165126 | . | + | . | gene_id | "XLOC_205292"; | transcript_id | "Novel_002822"; | exon_number | "4"; | gene_type | " |
| Dt_chr7 | Cufflinks | exon | 5165231 | 5165315 | . | + | . | gene_id | "XLOC_205292"; | transcript_id | "Novel_002822"; | exon_number | "5"; | gene_type | " |
| Dt_chr7 | Cufflinks | exon | 5165854 | 5166012 | . | + | . | gene_id | "XLOC_205292"; | transcript_id | "Novel_002822"; | exon_number | "6"; | gene_type | " |
| Dt_chr7 | Cufflinks | exon | 5167016 | 5167595 | . | + | . | gene_id | "XLOC_205292"; | transcript_id | "Novel_002822"; | exon_number | "7"; | gene_type | " |
| Dt_chr7 | Cufflinks | exon | 5197737 | 5200037 | . | + | . | gene_id | "XLOC_205304"; | transcript_id | "Novel_002823"; | exon_number | "1"; | gene_type | " |
| Dt_chr7 | Cufflinks | exon | 5200267 | 5200337 | . | + | . | gene_id | "XLOC_205304"; | transcript_id | "Novel_002823"; | exon_number | "2"; | gene_type | " |
| Dt_chr7 | Cufflinks | exon | 5200544 | 5200677 | . | + | . | gene_id | "XLOC_205304"; | transcript_id | "Novel_002823"; | exon_number | "3"; | gene_type | " |

|         |           |      |         |         |   |   |   |         |                              |                             |                |   |
|---------|-----------|------|---------|---------|---|---|---|---------|------------------------------|-----------------------------|----------------|---|
| Dt_chr7 | Cufflinks | exon | 5200764 | 5200793 | . | + | . | gene_id | "XLOC_205304"; transcript_id | "Novel_002823"; exon_number | "4"; gene_type | " |
| Dt_chr7 | Cufflinks | exon | 5197737 | 5200037 | . | + | . | gene_id | "XLOC_205304"; transcript_id | "Novel_002824"; exon_number | "1"; gene_type | " |
| Dt_chr7 | Cufflinks | exon | 5200267 | 5200337 | . | + | . | gene_id | "XLOC_205304"; transcript_id | "Novel_002824"; exon_number | "2"; gene_type | " |
| Dt_chr7 | Cufflinks | exon | 5200544 | 5201116 | . | + | . | gene_id | "XLOC_205304"; transcript_id | "Novel_002824"; exon_number | "3"; gene_type | " |
| Dt_chr7 | Cufflinks | exon | 5201422 | 5201595 | . | + | . | gene_id | "XLOC_205304"; transcript_id | "Novel_002824"; exon_number | "4"; gene_type | " |
| Dt_chr7 | Cufflinks | exon | 5201669 | 5202024 | . | + | . | gene_id | "XLOC_205304"; transcript_id | "Novel_002824"; exon_number | "5"; gene_type | " |
| Dt_chr7 | Cufflinks | exon | 5319990 | 5320137 | . | + | . | gene_id | "XLOC_205310"; transcript_id | "Novel_002825"; exon_number | "1"; gene_type | " |
| Dt_chr7 | Cufflinks | exon | 5320248 | 5321152 | . | + | . | gene_id | "XLOC_205310"; transcript_id | "Novel_002825"; exon_number | "2"; gene_type | " |
| Dt_chr7 | Cufflinks | exon | 5322115 | 5322227 | . | + | . | gene_id | "XLOC_205311"; transcript_id | "Novel_002826"; exon_number | "1"; gene_type | " |
| Dt_chr7 | Cufflinks | exon | 5322306 | 5322441 | . | + | . | gene_id | "XLOC_205311"; transcript_id | "Novel_002826"; exon_number | "2"; gene_type | " |
| Dt_chr7 | Cufflinks | exon | 5376784 | 5380019 | . | + | . | gene_id | "XLOC_205320"; transcript_id | "Novel_002827"; exon_number | "1"; gene_type | " |
| Dt_chr7 | Cufflinks | exon | 5380114 | 5380530 | . | + | . | gene_id | "XLOC_205320"; transcript_id | "Novel_002827"; exon_number | "2"; gene_type | " |
| Dt_chr7 | Cufflinks | exon | 5510507 | 5510892 | . | + | . | gene_id | "XLOC_205329"; transcript_id | "Novel_002828"; exon_number | "1"; gene_type | " |
| Dt_chr7 | Cufflinks | exon | 5511115 | 5511687 | . | + | . | gene_id | "XLOC_205329"; transcript_id | "Novel_002828"; exon_number | "2"; gene_type | " |
| Dt_chr7 | Cufflinks | exon | 5511777 | 5512893 | . | + | . | gene_id | "XLOC_205329"; transcript_id | "Novel_002828"; exon_number | "3"; gene_type | " |
| Dt_chr7 | Cufflinks | exon | 5653317 | 5653378 | . | + | . | gene_id | "XLOC_205348"; transcript_id | "Novel_002829"; exon_number | "1"; gene_type | " |
| Dt_chr7 | Cufflinks | exon | 5653742 | 5653858 | . | + | . | gene_id | "XLOC_205348"; transcript_id | "Novel_002829"; exon_number | "2"; gene_type | " |
| Dt_chr7 | Cufflinks | exon | 5675933 | 5676127 | . | + | . | gene_id | "XLOC_205348"; transcript_id | "Novel_002829"; exon_number | "3"; gene_type | " |
| Dt_chr7 | Cufflinks | exon | 5676247 | 5676474 | . | + | . | gene_id | "XLOC_205348"; transcript_id | "Novel_002829"; exon_number | "4"; gene_type | " |
| Dt_chr7 | Cufflinks | exon | 5674320 | 5674580 | . | + | . | gene_id | "XLOC_205348"; transcript_id | "Novel_002830"; exon_number | "1"; gene_type | " |
| Dt_chr7 | Cufflinks | exon | 5674949 | 5675065 | . | + | . | gene_id | "XLOC_205348"; transcript_id | "Novel_002830"; exon_number | "2"; gene_type | " |
| Dt_chr7 | Cufflinks | exon | 5675933 | 5676127 | . | + | . | gene_id | "XLOC_205348"; transcript_id | "Novel_002830"; exon_number | "3"; gene_type | " |
| Dt_chr7 | Cufflinks | exon | 5676247 | 5676485 | . | + | . | gene_id | "XLOC_205348"; transcript_id | "Novel_002830"; exon_number | "4"; gene_type | " |
| Dt_chr7 | Cufflinks | exon | 5674320 | 5674580 | . | + | . | gene_id | "XLOC_205348"; transcript_id | "Novel_002831"; exon_number | "1"; gene_type | " |
| Dt_chr7 | Cufflinks | exon | 5674949 | 5675065 | . | + | . | gene_id | "XLOC_205348"; transcript_id | "Novel_002831"; exon_number | "2"; gene_type | " |
| Dt_chr7 | Cufflinks | exon | 5675933 | 5676127 | . | + | . | gene_id | "XLOC_205348"; transcript_id | "Novel_002831"; exon_number | "3"; gene_type | " |
| Dt_chr7 | Cufflinks | exon | 5676250 | 5676485 | . | + | . | gene_id | "XLOC_205348"; transcript_id | "Novel_002831"; exon_number | "4"; gene_type | " |
| Dt_chr7 | Cufflinks | exon | 5675083 | 5676127 | . | + | . | gene_id | "XLOC_205348"; transcript_id | "Novel_002832"; exon_number | "1"; gene_type | " |
| Dt_chr7 | Cufflinks | exon | 5676247 | 5676573 | . | + | . | gene_id | "XLOC_205348"; transcript_id | "Novel_002832"; exon_number | "2"; gene_type | " |
| Dt_chr7 | Cufflinks | exon | 5656488 | 5656837 | . | + | . | gene_id | "XLOC_205351"; transcript_id | "Novel_002833"; exon_number | "1"; gene_type | " |
| Dt_chr7 | Cufflinks | exon | 5657066 | 5657225 | . | + | . | gene_id | "XLOC_205351"; transcript_id | "Novel_002833"; exon_number | "2"; gene_type | " |
| Dt_chr7 | Cufflinks | exon | 5678431 | 5678468 | . | + | . | gene_id | "XLOC_205351"; transcript_id | "Novel_002833"; exon_number | "3"; gene_type | " |
| Dt_chr7 | Cufflinks | exon | 5678607 | 5679039 | . | + | . | gene_id | "XLOC_205351"; transcript_id | "Novel_002833"; exon_number | "4"; gene_type | " |
| Dt_chr7 | Cufflinks | exon | 5656889 | 5657225 | . | + | . | gene_id | "XLOC_205351"; transcript_id | "Novel_002834"; exon_number | "1"; gene_type | " |
| Dt_chr7 | Cufflinks | exon | 5678431 | 5678468 | . | + | . | gene_id | "XLOC_205351"; transcript_id | "Novel_002834"; exon_number | "2"; gene_type | " |

|         |           |      |         |         |   |   |   |         |                |               |                 |             |      |           |   |
|---------|-----------|------|---------|---------|---|---|---|---------|----------------|---------------|-----------------|-------------|------|-----------|---|
| Dt_chr7 | Cufflinks | exon | 5678607 | 5679036 | . | + | . | gene_id | "XLOC_205351"; | transcript_id | "Novel_002834"; | exon_number | "3"; | gene_type | " |
| Dt_chr7 | Cufflinks | exon | 5677412 | 5677637 | . | + | . | gene_id | "XLOC_205351"; | transcript_id | "Novel_002835"; | exon_number | "1"; | gene_type | " |
| Dt_chr7 | Cufflinks | exon | 5677911 | 5678084 | . | + | . | gene_id | "XLOC_205351"; | transcript_id | "Novel_002835"; | exon_number | "2"; | gene_type | " |
| Dt_chr7 | Cufflinks | exon | 5678271 | 5678468 | . | + | . | gene_id | "XLOC_205351"; | transcript_id | "Novel_002835"; | exon_number | "3"; | gene_type | " |
| Dt_chr7 | Cufflinks | exon | 5678607 | 5679036 | . | + | . | gene_id | "XLOC_205351"; | transcript_id | "Novel_002835"; | exon_number | "4"; | gene_type | " |
| Dt_chr7 | Cufflinks | exon | 5677556 | 5678084 | . | + | . | gene_id | "XLOC_205351"; | transcript_id | "Novel_002836"; | exon_number | "1"; | gene_type | " |
| Dt_chr7 | Cufflinks | exon | 5678271 | 5678468 | . | + | . | gene_id | "XLOC_205351"; | transcript_id | "Novel_002836"; | exon_number | "2"; | gene_type | " |
| Dt_chr7 | Cufflinks | exon | 5678607 | 5679129 | . | + | . | gene_id | "XLOC_205351"; | transcript_id | "Novel_002836"; | exon_number | "3"; | gene_type | " |
| Dt_chr7 | Cufflinks | exon | 5671867 | 5671956 | . | + | . | gene_id | "XLOC_205353"; | transcript_id | "Novel_002837"; | exon_number | "1"; | gene_type | " |
| Dt_chr7 | Cufflinks | exon | 5672295 | 5672370 | . | + | . | gene_id | "XLOC_205353"; | transcript_id | "Novel_002837"; | exon_number | "2"; | gene_type | " |
| Dt_chr7 | Cufflinks | exon | 5672476 | 5672982 | . | + | . | gene_id | "XLOC_205353"; | transcript_id | "Novel_002837"; | exon_number | "3"; | gene_type | " |
| Dt_chr7 | Cufflinks | exon | 5748782 | 5749233 | . | + | . | gene_id | "XLOC_205379"; | transcript_id | "Novel_002838"; | exon_number | "1"; | gene_type | " |
| Dt_chr7 | Cufflinks | exon | 5749869 | 5750185 | . | + | . | gene_id | "XLOC_205379"; | transcript_id | "Novel_002838"; | exon_number | "2"; | gene_type | " |
| Dt_chr7 | Cufflinks | exon | 5778365 | 5778922 | . | + | . | gene_id | "XLOC_205383"; | transcript_id | "Novel_002839"; | exon_number | "1"; | gene_type | " |
| Dt_chr7 | Cufflinks | exon | 5779009 | 5780363 | . | + | . | gene_id | "XLOC_205383"; | transcript_id | "Novel_002839"; | exon_number | "2"; | gene_type | " |
| Dt_chr7 | Cufflinks | exon | 5780522 | 5780756 | . | + | . | gene_id | "XLOC_205383"; | transcript_id | "Novel_002839"; | exon_number | "3"; | gene_type | " |
| Dt_chr7 | Cufflinks | exon | 5781186 | 5782001 | . | + | . | gene_id | "XLOC_205383"; | transcript_id | "Novel_002839"; | exon_number | "4"; | gene_type | " |
| Dt_chr7 | Cufflinks | exon | 5797435 | 5798875 | . | + | . | gene_id | "XLOC_205389"; | transcript_id | "Novel_002840"; | exon_number | "1"; | gene_type | " |
| Dt_chr7 | Cufflinks | exon | 5798966 | 5801773 | . | + | . | gene_id | "XLOC_205389"; | transcript_id | "Novel_002840"; | exon_number | "2"; | gene_type | " |
| Dt_chr7 | Cufflinks | exon | 5797441 | 5798316 | . | + | . | gene_id | "XLOC_205389"; | transcript_id | "Novel_002841"; | exon_number | "1"; | gene_type | " |
| Dt_chr7 | Cufflinks | exon | 5798444 | 5799447 | . | + | . | gene_id | "XLOC_205389"; | transcript_id | "Novel_002841"; | exon_number | "2"; | gene_type | " |
| Dt_chr7 | Cufflinks | exon | 5797445 | 5799970 | . | + | . | gene_id | "XLOC_205389"; | transcript_id | "Novel_002842"; | exon_number | "1"; | gene_type | " |
| Dt_chr7 | Cufflinks | exon | 5800055 | 5800267 | . | + | . | gene_id | "XLOC_205389"; | transcript_id | "Novel_002842"; | exon_number | "2"; | gene_type | " |
| Dt_chr7 | Cufflinks | exon | 5801412 | 5801458 | . | + | . | gene_id | "XLOC_205389"; | transcript_id | "Novel_002842"; | exon_number | "3"; | gene_type | " |
| Dt_chr7 | Cufflinks | exon | 5908247 | 5908997 | . | + | . | gene_id | "XLOC_205416"; | transcript_id | "Novel_002843"; | exon_number | "1"; | gene_type | " |
| Dt_chr7 | Cufflinks | exon | 5909089 | 5909287 | . | + | . | gene_id | "XLOC_205416"; | transcript_id | "Novel_002843"; | exon_number | "2"; | gene_type | " |
| Dt_chr7 | Cufflinks | exon | 5908361 | 5908452 | . | + | . | gene_id | "XLOC_205416"; | transcript_id | "Novel_002844"; | exon_number | "1"; | gene_type | " |
| Dt_chr7 | Cufflinks | exon | 5908530 | 5908983 | . | + | . | gene_id | "XLOC_205416"; | transcript_id | "Novel_002844"; | exon_number | "2"; | gene_type | " |
| Dt_chr7 | Cufflinks | exon | 5908366 | 5908791 | . | + | . | gene_id | "XLOC_205416"; | transcript_id | "Novel_002845"; | exon_number | "1"; | gene_type | " |
| Dt_chr7 | Cufflinks | exon | 5908920 | 5908997 | . | + | . | gene_id | "XLOC_205416"; | transcript_id | "Novel_002845"; | exon_number | "2"; | gene_type | " |
| Dt_chr7 | Cufflinks | exon | 5909089 | 5910148 | . | + | . | gene_id | "XLOC_205416"; | transcript_id | "Novel_002845"; | exon_number | "3"; | gene_type | " |
| Dt_chr7 | Cufflinks | exon | 5908370 | 5908452 | . | + | . | gene_id | "XLOC_205416"; | transcript_id | "Novel_002846"; | exon_number | "1"; | gene_type | " |
| Dt_chr7 | Cufflinks | exon | 5908530 | 5908791 | . | + | . | gene_id | "XLOC_205416"; | transcript_id | "Novel_002846"; | exon_number | "2"; | gene_type | " |
| Dt_chr7 | Cufflinks | exon | 5908920 | 5908941 | . | + | . | gene_id | "XLOC_205416"; | transcript_id | "Novel_002846"; | exon_number | "3"; | gene_type | " |
| Dt_chr7 | Cufflinks | exon | 5910206 | 5910610 | . | + | . | gene_id | "XLOC_205416"; | transcript_id | "Novel_002847"; | exon_number | "1"; | gene_type | " |

|         |           |      |         |         |   |   |   |         |                |               |                 |             |      |           |   |
|---------|-----------|------|---------|---------|---|---|---|---------|----------------|---------------|-----------------|-------------|------|-----------|---|
| Dt_chr7 | Cufflinks | exon | 5910716 | 5910836 | . | + | . | gene_id | "XLOC_205416"; | transcript_id | "Novel_002847"; | exon_number | "2"; | gene_type | " |
| Dt_chr7 | Cufflinks | exon | 5910914 | 5910982 | . | + | . | gene_id | "XLOC_205416"; | transcript_id | "Novel_002847"; | exon_number | "3"; | gene_type | " |
| Dt_chr7 | Cufflinks | exon | 5910217 | 5910610 | . | + | . | gene_id | "XLOC_205416"; | transcript_id | "Novel_002848"; | exon_number | "1"; | gene_type | " |
| Dt_chr7 | Cufflinks | exon | 5910716 | 5911057 | . | + | . | gene_id | "XLOC_205416"; | transcript_id | "Novel_002848"; | exon_number | "2"; | gene_type | " |
| Dt_chr7 | Cufflinks | exon | 5916506 | 5916530 | . | + | . | gene_id | "XLOC_205417"; | transcript_id | "Novel_002849"; | exon_number | "1"; | gene_type | " |
| Dt_chr7 | Cufflinks | exon | 5916606 | 5917165 | . | + | . | gene_id | "XLOC_205417"; | transcript_id | "Novel_002849"; | exon_number | "2"; | gene_type | " |
| Dt_chr7 | Cufflinks | exon | 7070054 | 7070547 | . | + | . | gene_id | "XLOC_205638"; | transcript_id | "Novel_002850"; | exon_number | "1"; | gene_type | " |
| Dt_chr7 | Cufflinks | exon | 7071343 | 7071412 | . | + | . | gene_id | "XLOC_205638"; | transcript_id | "Novel_002850"; | exon_number | "2"; | gene_type | " |
| Dt_chr7 | Cufflinks | exon | 7071533 | 7071705 | . | + | . | gene_id | "XLOC_205638"; | transcript_id | "Novel_002850"; | exon_number | "3"; | gene_type | " |
| Dt_chr7 | Cufflinks | exon | 7072133 | 7072307 | . | + | . | gene_id | "XLOC_205638"; | transcript_id | "Novel_002850"; | exon_number | "4"; | gene_type | " |
| Dt_chr7 | Cufflinks | exon | 7072650 | 7072816 | . | + | . | gene_id | "XLOC_205638"; | transcript_id | "Novel_002850"; | exon_number | "5"; | gene_type | " |
| Dt_chr7 | Cufflinks | exon | 7072934 | 7073153 | . | + | . | gene_id | "XLOC_205638"; | transcript_id | "Novel_002850"; | exon_number | "6"; | gene_type | " |
| Dt_chr7 | Cufflinks | exon | 7073250 | 7073354 | . | + | . | gene_id | "XLOC_205638"; | transcript_id | "Novel_002850"; | exon_number | "7"; | gene_type | " |
| Dt_chr7 | Cufflinks | exon | 7073622 | 7073774 | . | + | . | gene_id | "XLOC_205638"; | transcript_id | "Novel_002850"; | exon_number | "8"; | gene_type | " |
| Dt_chr7 | Cufflinks | exon | 7073912 | 7074643 | . | + | . | gene_id | "XLOC_205638"; | transcript_id | "Novel_002850"; | exon_number | "9"; | gene_type | " |
| Dt_chr7 | Cufflinks | exon | 7408083 | 7408223 | . | + | . | gene_id | "XLOC_205693"; | transcript_id | "Novel_002851"; | exon_number | "1"; | gene_type | " |
| Dt_chr7 | Cufflinks | exon | 7408692 | 7408973 | . | + | . | gene_id | "XLOC_205693"; | transcript_id | "Novel_002851"; | exon_number | "2"; | gene_type | " |
| Dt_chr7 | Cufflinks | exon | 7409059 | 7409130 | . | + | . | gene_id | "XLOC_205693"; | transcript_id | "Novel_002851"; | exon_number | "3"; | gene_type | " |
| Dt_chr7 | Cufflinks | exon | 7409295 | 7409362 | . | + | . | gene_id | "XLOC_205693"; | transcript_id | "Novel_002851"; | exon_number | "4"; | gene_type | " |
| Dt_chr7 | Cufflinks | exon | 7409556 | 7409706 | . | + | . | gene_id | "XLOC_205693"; | transcript_id | "Novel_002851"; | exon_number | "5"; | gene_type | " |
| Dt_chr7 | Cufflinks | exon | 7409793 | 7409873 | . | + | . | gene_id | "XLOC_205693"; | transcript_id | "Novel_002851"; | exon_number | "6"; | gene_type | " |
| Dt_chr7 | Cufflinks | exon | 7409962 | 7410051 | . | + | . | gene_id | "XLOC_205693"; | transcript_id | "Novel_002851"; | exon_number | "7"; | gene_type | " |
| Dt_chr7 | Cufflinks | exon | 7410163 | 7410945 | . | + | . | gene_id | "XLOC_205693"; | transcript_id | "Novel_002851"; | exon_number | "8"; | gene_type | " |
| Dt_chr7 | Cufflinks | exon | 7570436 | 7570674 | . | + | . | gene_id | "XLOC_205723"; | transcript_id | "Novel_002852"; | exon_number | "1"; | gene_type | " |
| Dt_chr7 | Cufflinks | exon | 7570761 | 7571395 | . | + | . | gene_id | "XLOC_205723"; | transcript_id | "Novel_002852"; | exon_number | "2"; | gene_type | " |
| Dt_chr7 | Cufflinks | exon | 8236556 | 8236731 | . | + | . | gene_id | "XLOC_205840"; | transcript_id | "Novel_002853"; | exon_number | "1"; | gene_type | " |
| Dt_chr7 | Cufflinks | exon | 8236966 | 8237117 | . | + | . | gene_id | "XLOC_205840"; | transcript_id | "Novel_002853"; | exon_number | "2"; | gene_type | " |
| Dt_chr7 | Cufflinks | exon | 8238093 | 8238137 | . | + | . | gene_id | "XLOC_205840"; | transcript_id | "Novel_002853"; | exon_number | "3"; | gene_type | " |
| Dt_chr7 | Cufflinks | exon | 8239061 | 8241158 | . | + | . | gene_id | "XLOC_205840"; | transcript_id | "Novel_002853"; | exon_number | "4"; | gene_type | " |
| Dt_chr7 | Cufflinks | exon | 8236620 | 8236731 | . | + | . | gene_id | "XLOC_205840"; | transcript_id | "Novel_002854"; | exon_number | "1"; | gene_type | " |
| Dt_chr7 | Cufflinks | exon | 8238093 | 8238137 | . | + | . | gene_id | "XLOC_205840"; | transcript_id | "Novel_002854"; | exon_number | "2"; | gene_type | " |
| Dt_chr7 | Cufflinks | exon | 8239061 | 8241576 | . | + | . | gene_id | "XLOC_205840"; | transcript_id | "Novel_002854"; | exon_number | "3"; | gene_type | " |
| Dt_chr7 | Cufflinks | exon | 8443566 | 8445031 | . | + | . | gene_id | "XLOC_205879"; | transcript_id | "Novel_002855"; | exon_number | "1"; | gene_type | " |
| Dt_chr7 | Cufflinks | exon | 8445509 | 8446045 | . | + | . | gene_id | "XLOC_205879"; | transcript_id | "Novel_002855"; | exon_number | "2"; | gene_type | " |
| Dt_chr7 | Cufflinks | exon | 8443570 | 8445031 | . | + | . | gene_id | "XLOC_205879"; | transcript_id | "Novel_002856"; | exon_number | "1"; | gene_type | " |



|         |           |      |         |         |   |   |   |         |                |               |                 |             |      |           |   |
|---------|-----------|------|---------|---------|---|---|---|---------|----------------|---------------|-----------------|-------------|------|-----------|---|
| Dt_chr7 | Cufflinks | exon | 8445668 | 8446279 | . | + | . | gene_id | "XLOC_205879"; | transcript_id | "Novel_002856"; | exon_number | "2"; | gene_type | " |
| Dt_chr7 | Cufflinks | exon | 8480800 | 8481927 | . | + | . | gene_id | "XLOC_205881"; | transcript_id | "Novel_002857"; | exon_number | "1"; | gene_type | " |
| Dt_chr7 | Cufflinks | exon | 8482121 | 8482908 | . | + | . | gene_id | "XLOC_205881"; | transcript_id | "Novel_002857"; | exon_number | "2"; | gene_type | " |
| Dt_chr7 | Cufflinks | exon | 8873639 | 8873897 | . | + | . | gene_id | "XLOC_205933"; | transcript_id | "Novel_002858"; | exon_number | "1"; | gene_type | " |
| Dt_chr7 | Cufflinks | exon | 8964589 | 8965061 | . | + | . | gene_id | "XLOC_205941"; | transcript_id | "Novel_002859"; | exon_number | "1"; | gene_type | " |
| Dt_chr7 | Cufflinks | exon | 8965162 | 8965356 | . | + | . | gene_id | "XLOC_205941"; | transcript_id | "Novel_002859"; | exon_number | "2"; | gene_type | " |
| Dt_chr7 | Cufflinks | exon | 8969874 | 8970110 | . | + | . | gene_id | "XLOC_205941"; | transcript_id | "Novel_002859"; | exon_number | "3"; | gene_type | " |
| Dt_chr7 | Cufflinks | exon | 8964605 | 8965061 | . | + | . | gene_id | "XLOC_205941"; | transcript_id | "Novel_002860"; | exon_number | "1"; | gene_type | " |
| Dt_chr7 | Cufflinks | exon | 8965162 | 8965356 | . | + | . | gene_id | "XLOC_205941"; | transcript_id | "Novel_002860"; | exon_number | "2"; | gene_type | " |
| Dt_chr7 | Cufflinks | exon | 8969874 | 8969996 | . | + | . | gene_id | "XLOC_205941"; | transcript_id | "Novel_002860"; | exon_number | "3"; | gene_type | " |
| Dt_chr7 | Cufflinks | exon | 8970791 | 8970996 | . | + | . | gene_id | "XLOC_205941"; | transcript_id | "Novel_002860"; | exon_number | "4"; | gene_type | " |
| Dt_chr7 | Cufflinks | exon | 8971080 | 8971778 | . | + | . | gene_id | "XLOC_205941"; | transcript_id | "Novel_002860"; | exon_number | "5"; | gene_type | " |
| Dt_chr7 | Cufflinks | exon | 8964605 | 8965061 | . | + | . | gene_id | "XLOC_205941"; | transcript_id | "Novel_002861"; | exon_number | "1"; | gene_type | " |
| Dt_chr7 | Cufflinks | exon | 8965162 | 8965356 | . | + | . | gene_id | "XLOC_205941"; | transcript_id | "Novel_002861"; | exon_number | "2"; | gene_type | " |
| Dt_chr7 | Cufflinks | exon | 8969874 | 8969996 | . | + | . | gene_id | "XLOC_205941"; | transcript_id | "Novel_002861"; | exon_number | "3"; | gene_type | " |
| Dt_chr7 | Cufflinks | exon | 8970791 | 8971778 | . | + | . | gene_id | "XLOC_205941"; | transcript_id | "Novel_002861"; | exon_number | "4"; | gene_type | " |
| Dt_chr7 | Cufflinks | exon | 8969835 | 8969996 | . | + | . | gene_id | "XLOC_205941"; | transcript_id | "Novel_002862"; | exon_number | "1"; | gene_type | " |
| Dt_chr7 | Cufflinks | exon | 8970791 | 8970996 | . | + | . | gene_id | "XLOC_205941"; | transcript_id | "Novel_002862"; | exon_number | "2"; | gene_type | " |
| Dt_chr7 | Cufflinks | exon | 8971080 | 8971688 | . | + | . | gene_id | "XLOC_205941"; | transcript_id | "Novel_002862"; | exon_number | "3"; | gene_type | " |
| Dt_chr7 | Cufflinks | exon | 9111690 | 9111997 | . | + | . | gene_id | "XLOC_205973"; | transcript_id | "Novel_002863"; | exon_number | "1"; | gene_type | " |
| Dt_chr7 | Cufflinks | exon | 9112098 | 9112167 | . | + | . | gene_id | "XLOC_205973"; | transcript_id | "Novel_002863"; | exon_number | "2"; | gene_type | " |
| Dt_chr7 | Cufflinks | exon | 9204890 | 9205079 | . | + | . | gene_id | "XLOC_205985"; | transcript_id | "Novel_002864"; | exon_number | "1"; | gene_type | " |
| Dt_chr7 | Cufflinks | exon | 9205645 | 9205828 | . | + | . | gene_id | "XLOC_205985"; | transcript_id | "Novel_002864"; | exon_number | "2"; | gene_type | " |
| Dt_chr7 | Cufflinks | exon | 9206037 | 9206076 | . | + | . | gene_id | "XLOC_205985"; | transcript_id | "Novel_002864"; | exon_number | "3"; | gene_type | " |
| Dt_chr7 | Cufflinks | exon | 9206357 | 9206407 | . | + | . | gene_id | "XLOC_205985"; | transcript_id | "Novel_002864"; | exon_number | "4"; | gene_type | " |
| Dt_chr7 | Cufflinks | exon | 9207698 | 9207783 | . | + | . | gene_id | "XLOC_205985"; | transcript_id | "Novel_002864"; | exon_number | "5"; | gene_type | " |
| Dt_chr7 | Cufflinks | exon | 9208468 | 9208605 | . | + | . | gene_id | "XLOC_205985"; | transcript_id | "Novel_002864"; | exon_number | "6"; | gene_type | " |
| Dt_chr7 | Cufflinks | exon | 9208735 | 9208885 | . | + | . | gene_id | "XLOC_205985"; | transcript_id | "Novel_002864"; | exon_number | "7"; | gene_type | " |
| Dt_chr7 | Cufflinks | exon | 9209076 | 9209836 | . | + | . | gene_id | "XLOC_205985"; | transcript_id | "Novel_002864"; | exon_number | "8"; | gene_type | " |
| Dt_chr7 | Cufflinks | exon | 9204906 | 9205079 | . | + | . | gene_id | "XLOC_205985"; | transcript_id | "Novel_002865"; | exon_number | "1"; | gene_type | " |
| Dt_chr7 | Cufflinks | exon | 9205645 | 9205828 | . | + | . | gene_id | "XLOC_205985"; | transcript_id | "Novel_002865"; | exon_number | "2"; | gene_type | " |
| Dt_chr7 | Cufflinks | exon | 9206037 | 9206076 | . | + | . | gene_id | "XLOC_205985"; | transcript_id | "Novel_002865"; | exon_number | "3"; | gene_type | " |
| Dt_chr7 | Cufflinks | exon | 9206932 | 9206982 | . | + | . | gene_id | "XLOC_205985"; | transcript_id | "Novel_002865"; | exon_number | "4"; | gene_type | " |
| Dt_chr7 | Cufflinks | exon | 9207698 | 9207783 | . | + | . | gene_id | "XLOC_205985"; | transcript_id | "Novel_002865"; | exon_number | "5"; | gene_type | " |
| Dt_chr7 | Cufflinks | exon | 9208468 | 9208605 | . | + | . | gene_id | "XLOC_205985"; | transcript_id | "Novel_002865"; | exon_number | "6"; | gene_type | " |



|         |           |      |          |          |   |   |   |         |                |               |                 |             |       |           |   |
|---------|-----------|------|----------|----------|---|---|---|---------|----------------|---------------|-----------------|-------------|-------|-----------|---|
| Dt_chr7 | Cufflinks | exon | 10052051 | 10052104 | . | + | . | gene_id | "XLOC_206125"; | transcript_id | "Novel_002872"; | exon_number | "2";  | gene_type | " |
| Dt_chr7 | Cufflinks | exon | 10052187 | 10055510 | . | + | . | gene_id | "XLOC_206125"; | transcript_id | "Novel_002872"; | exon_number | "3";  | gene_type | " |
| Dt_chr7 | Cufflinks | exon | 10751828 | 10752378 | . | + | . | gene_id | "XLOC_206219"; | transcript_id | "Novel_002873"; | exon_number | "1";  | gene_type | " |
| Dt_chr7 | Cufflinks | exon | 10752972 | 10753826 | . | + | . | gene_id | "XLOC_206219"; | transcript_id | "Novel_002873"; | exon_number | "2";  | gene_type | " |
| Dt_chr7 | Cufflinks | exon | 11830997 | 11831025 | . | + | . | gene_id | "XLOC_206371"; | transcript_id | "Novel_002874"; | exon_number | "1";  | gene_type | " |
| Dt_chr7 | Cufflinks | exon | 11831538 | 11831921 | . | + | . | gene_id | "XLOC_206371"; | transcript_id | "Novel_002874"; | exon_number | "2";  | gene_type | " |
| Dt_chr7 | Cufflinks | exon | 13945930 | 13953017 | . | + | . | gene_id | "XLOC_206651"; | transcript_id | "Novel_002875"; | exon_number | "1";  | gene_type | " |
| Dt_chr7 | Cufflinks | exon | 13954045 | 13954687 | . | + | . | gene_id | "XLOC_206651"; | transcript_id | "Novel_002875"; | exon_number | "2";  | gene_type | " |
| Dt_chr7 | Cufflinks | exon | 14309968 | 14310098 | . | + | . | gene_id | "XLOC_206695"; | transcript_id | "Novel_002876"; | exon_number | "1";  | gene_type | " |
| Dt_chr7 | Cufflinks | exon | 14311087 | 14311223 | . | + | . | gene_id | "XLOC_206695"; | transcript_id | "Novel_002876"; | exon_number | "2";  | gene_type | " |
| Dt_chr7 | Cufflinks | exon | 14311486 | 14311570 | . | + | . | gene_id | "XLOC_206695"; | transcript_id | "Novel_002876"; | exon_number | "3";  | gene_type | " |
| Dt_chr7 | Cufflinks | exon | 14311690 | 14311762 | . | + | . | gene_id | "XLOC_206695"; | transcript_id | "Novel_002876"; | exon_number | "4";  | gene_type | " |
| Dt_chr7 | Cufflinks | exon | 14312301 | 14312398 | . | + | . | gene_id | "XLOC_206695"; | transcript_id | "Novel_002876"; | exon_number | "5";  | gene_type | " |
| Dt_chr7 | Cufflinks | exon | 14312570 | 14312662 | . | + | . | gene_id | "XLOC_206695"; | transcript_id | "Novel_002876"; | exon_number | "6";  | gene_type | " |
| Dt_chr7 | Cufflinks | exon | 14312807 | 14312880 | . | + | . | gene_id | "XLOC_206695"; | transcript_id | "Novel_002876"; | exon_number | "7";  | gene_type | " |
| Dt_chr7 | Cufflinks | exon | 14312980 | 14313018 | . | + | . | gene_id | "XLOC_206695"; | transcript_id | "Novel_002876"; | exon_number | "8";  | gene_type | " |
| Dt_chr7 | Cufflinks | exon | 14313102 | 14313190 | . | + | . | gene_id | "XLOC_206695"; | transcript_id | "Novel_002876"; | exon_number | "9";  | gene_type | " |
| Dt_chr7 | Cufflinks | exon | 14313267 | 14313343 | . | + | . | gene_id | "XLOC_206695"; | transcript_id | "Novel_002876"; | exon_number | "10"; | gene_type | " |
| Dt_chr7 | Cufflinks | exon | 14313443 | 14313517 | . | + | . | gene_id | "XLOC_206695"; | transcript_id | "Novel_002876"; | exon_number | "11"; | gene_type | " |
| Dt_chr7 | Cufflinks | exon | 14313772 | 14313819 | . | + | . | gene_id | "XLOC_206695"; | transcript_id | "Novel_002876"; | exon_number | "12"; | gene_type | " |
| Dt_chr7 | Cufflinks | exon | 14313912 | 14313995 | . | + | . | gene_id | "XLOC_206695"; | transcript_id | "Novel_002876"; | exon_number | "13"; | gene_type | " |
| Dt_chr7 | Cufflinks | exon | 14314085 | 14314172 | . | + | . | gene_id | "XLOC_206695"; | transcript_id | "Novel_002876"; | exon_number | "14"; | gene_type | " |
| Dt_chr7 | Cufflinks | exon | 14314249 | 14314327 | . | + | . | gene_id | "XLOC_206695"; | transcript_id | "Novel_002876"; | exon_number | "15"; | gene_type | " |
| Dt_chr7 | Cufflinks | exon | 14314713 | 14314803 | . | + | . | gene_id | "XLOC_206695"; | transcript_id | "Novel_002876"; | exon_number | "16"; | gene_type | " |
| Dt_chr7 | Cufflinks | exon | 14314893 | 14314971 | . | + | . | gene_id | "XLOC_206695"; | transcript_id | "Novel_002876"; | exon_number | "17"; | gene_type | " |
| Dt_chr7 | Cufflinks | exon | 14315174 | 14315289 | . | + | . | gene_id | "XLOC_206695"; | transcript_id | "Novel_002876"; | exon_number | "18"; | gene_type | " |
| Dt_chr7 | Cufflinks | exon | 14315495 | 14315824 | . | + | . | gene_id | "XLOC_206695"; | transcript_id | "Novel_002876"; | exon_number | "19"; | gene_type | " |
| Dt_chr7 | Cufflinks | exon | 18851429 | 18851615 | . | + | . | gene_id | "XLOC_207152"; | transcript_id | "Novel_002877"; | exon_number | "1";  | gene_type | " |
| Dt_chr7 | Cufflinks | exon | 18851736 | 18851886 | . | + | . | gene_id | "XLOC_207152"; | transcript_id | "Novel_002877"; | exon_number | "2";  | gene_type | " |
| Dt_chr7 | Cufflinks | exon | 18924211 | 18924393 | . | + | . | gene_id | "XLOC_207168"; | transcript_id | "Novel_002878"; | exon_number | "1";  | gene_type | " |
| Dt_chr7 | Cufflinks | exon | 18924487 | 18924547 | . | + | . | gene_id | "XLOC_207168"; | transcript_id | "Novel_002878"; | exon_number | "2";  | gene_type | " |
| Dt_chr7 | Cufflinks | exon | 18925293 | 18927376 | . | + | . | gene_id | "XLOC_207168"; | transcript_id | "Novel_002878"; | exon_number | "3";  | gene_type | " |
| Dt_chr7 | Cufflinks | exon | 20496077 | 20496334 | . | + | . | gene_id | "XLOC_207364"; | transcript_id | "Novel_002879"; | exon_number | "1";  | gene_type | " |
| Dt_chr7 | Cufflinks | exon | 20499046 | 20501133 | . | + | . | gene_id | "XLOC_207364"; | transcript_id | "Novel_002879"; | exon_number | "2";  | gene_type | " |
| Dt_chr7 | Cufflinks | exon | 23268196 | 23268439 | . | + | . | gene_id | "XLOC_207642"; | transcript_id | "Novel_002880"; | exon_number | "1";  | gene_type | " |



|         |           |      |          |          |   |   |   |         |                |               |                 |             |      |           |   |
|---------|-----------|------|----------|----------|---|---|---|---------|----------------|---------------|-----------------|-------------|------|-----------|---|
| Dt_chr7 | Cufflinks | exon | 30217239 | 30217771 | . | + | . | gene_id | "XLOC_208225"; | transcript_id | "Novel_002888"; | exon_number | "5"; | gene_type | " |
| Dt_chr7 | Cufflinks | exon | 30209232 | 30209321 | . | + | . | gene_id | "XLOC_208225"; | transcript_id | "Novel_002889"; | exon_number | "1"; | gene_type | " |
| Dt_chr7 | Cufflinks | exon | 30209674 | 30209748 | . | + | . | gene_id | "XLOC_208225"; | transcript_id | "Novel_002889"; | exon_number | "2"; | gene_type | " |
| Dt_chr7 | Cufflinks | exon | 30210259 | 30210285 | . | + | . | gene_id | "XLOC_208225"; | transcript_id | "Novel_002889"; | exon_number | "3"; | gene_type | " |
| Dt_chr7 | Cufflinks | exon | 30210998 | 30211112 | . | + | . | gene_id | "XLOC_208225"; | transcript_id | "Novel_002889"; | exon_number | "4"; | gene_type | " |
| Dt_chr7 | Cufflinks | exon | 30211213 | 30211298 | . | + | . | gene_id | "XLOC_208225"; | transcript_id | "Novel_002889"; | exon_number | "5"; | gene_type | " |
| Dt_chr7 | Cufflinks | exon | 30217239 | 30217779 | . | + | . | gene_id | "XLOC_208225"; | transcript_id | "Novel_002889"; | exon_number | "6"; | gene_type | " |
| Dt_chr7 | Cufflinks | exon | 30209238 | 30209321 | . | + | . | gene_id | "XLOC_208225"; | transcript_id | "Novel_002890"; | exon_number | "1"; | gene_type | " |
| Dt_chr7 | Cufflinks | exon | 30209674 | 30211112 | . | + | . | gene_id | "XLOC_208225"; | transcript_id | "Novel_002890"; | exon_number | "2"; | gene_type | " |
| Dt_chr7 | Cufflinks | exon | 30211213 | 30211566 | . | + | . | gene_id | "XLOC_208225"; | transcript_id | "Novel_002890"; | exon_number | "3"; | gene_type | " |
| Dt_chr7 | Cufflinks | exon | 30209240 | 30209321 | . | + | . | gene_id | "XLOC_208225"; | transcript_id | "Novel_002891"; | exon_number | "1"; | gene_type | " |
| Dt_chr7 | Cufflinks | exon | 30209674 | 30211122 | . | + | . | gene_id | "XLOC_208225"; | transcript_id | "Novel_002891"; | exon_number | "2"; | gene_type | " |
| Dt_chr7 | Cufflinks | exon | 33683751 | 33684047 | . | + | . | gene_id | "XLOC_208451"; | transcript_id | "Novel_002892"; | exon_number | "1"; | gene_type | " |
| Dt_chr7 | Cufflinks | exon | 33684157 | 33684273 | . | + | . | gene_id | "XLOC_208451"; | transcript_id | "Novel_002892"; | exon_number | "2"; | gene_type | " |
| Dt_chr7 | Cufflinks | exon | 33684456 | 33684705 | . | + | . | gene_id | "XLOC_208451"; | transcript_id | "Novel_002892"; | exon_number | "3"; | gene_type | " |
| Dt_chr7 | Cufflinks | exon | 33683755 | 33684047 | . | + | . | gene_id | "XLOC_208451"; | transcript_id | "Novel_002893"; | exon_number | "1"; | gene_type | " |
| Dt_chr7 | Cufflinks | exon | 33684157 | 33685637 | . | + | . | gene_id | "XLOC_208451"; | transcript_id | "Novel_002893"; | exon_number | "2"; | gene_type | " |
| Dt_chr7 | Cufflinks | exon | 34104155 | 34104448 | . | + | . | gene_id | "XLOC_208471"; | transcript_id | "Novel_002894"; | exon_number | "1"; | gene_type | " |
| Dt_chr7 | Cufflinks | exon | 34104571 | 34104645 | . | + | . | gene_id | "XLOC_208471"; | transcript_id | "Novel_002894"; | exon_number | "2"; | gene_type | " |
| Dt_chr7 | Cufflinks | exon | 34105040 | 34105141 | . | + | . | gene_id | "XLOC_208471"; | transcript_id | "Novel_002894"; | exon_number | "3"; | gene_type | " |
| Dt_chr7 | Cufflinks | exon | 34105248 | 34105833 | . | + | . | gene_id | "XLOC_208471"; | transcript_id | "Novel_002894"; | exon_number | "4"; | gene_type | " |
| Dt_chr7 | Cufflinks | exon | 34105913 | 34106011 | . | + | . | gene_id | "XLOC_208471"; | transcript_id | "Novel_002894"; | exon_number | "5"; | gene_type | " |
| Dt_chr7 | Cufflinks | exon | 34106102 | 34106885 | . | + | . | gene_id | "XLOC_208471"; | transcript_id | "Novel_002894"; | exon_number | "6"; | gene_type | " |
| Dt_chr7 | Cufflinks | exon | 34104157 | 34105141 | . | + | . | gene_id | "XLOC_208471"; | transcript_id | "Novel_002895"; | exon_number | "1"; | gene_type | " |
| Dt_chr7 | Cufflinks | exon | 34105248 | 34105301 | . | + | . | gene_id | "XLOC_208471"; | transcript_id | "Novel_002895"; | exon_number | "2"; | gene_type | " |
| Dt_chr7 | Cufflinks | exon | 34105389 | 34105481 | . | + | . | gene_id | "XLOC_208471"; | transcript_id | "Novel_002895"; | exon_number | "3"; | gene_type | " |
| Dt_chr7 | Cufflinks | exon | 34105553 | 34105645 | . | + | . | gene_id | "XLOC_208471"; | transcript_id | "Novel_002895"; | exon_number | "4"; | gene_type | " |
| Dt_chr7 | Cufflinks | exon | 34105729 | 34105780 | . | + | . | gene_id | "XLOC_208471"; | transcript_id | "Novel_002895"; | exon_number | "5"; | gene_type | " |
| Dt_chr7 | Cufflinks | exon | 36597697 | 36597902 | . | + | . | gene_id | "XLOC_208714"; | transcript_id | "Novel_002896"; | exon_number | "1"; | gene_type | " |
| Dt_chr7 | Cufflinks | exon | 36599756 | 36599978 | . | + | . | gene_id | "XLOC_208714"; | transcript_id | "Novel_002896"; | exon_number | "2"; | gene_type | " |
| Dt_chr7 | Cufflinks | exon | 36600579 | 36600877 | . | + | . | gene_id | "XLOC_208714"; | transcript_id | "Novel_002896"; | exon_number | "3"; | gene_type | " |
| Dt_chr7 | Cufflinks | exon | 36600993 | 36601798 | . | + | . | gene_id | "XLOC_208714"; | transcript_id | "Novel_002896"; | exon_number | "4"; | gene_type | " |
| Dt_chr7 | Cufflinks | exon | 37624147 | 37625456 | . | + | . | gene_id | "XLOC_208843"; | transcript_id | "Novel_002897"; | exon_number | "1"; | gene_type | " |
| Dt_chr7 | Cufflinks | exon | 37748613 | 37748747 | . | + | . | gene_id | "XLOC_208848"; | transcript_id | "Novel_002898"; | exon_number | "1"; | gene_type | " |
| Dt_chr7 | Cufflinks | exon | 37749265 | 37749391 | . | + | . | gene_id | "XLOC_208848"; | transcript_id | "Novel_002898"; | exon_number | "2"; | gene_type | " |

|         |           |      |          |          |   |   |   |         |                |               |                 |             |       |           |   |
|---------|-----------|------|----------|----------|---|---|---|---------|----------------|---------------|-----------------|-------------|-------|-----------|---|
| Dt_chr7 | Cufflinks | exon | 37749482 | 37749554 | . | + | . | gene_id | "XLOC_208848"; | transcript_id | "Novel_002898"; | exon_number | "3";  | gene_type | " |
| Dt_chr7 | Cufflinks | exon | 37749962 | 37750716 | . | + | . | gene_id | "XLOC_208848"; | transcript_id | "Novel_002898"; | exon_number | "4";  | gene_type | " |
| Dt_chr7 | Cufflinks | exon | 41335926 | 41336745 | . | + | . | gene_id | "XLOC_209086"; | transcript_id | "Novel_002899"; | exon_number | "1";  | gene_type | " |
| Dt_chr7 | Cufflinks | exon | 41336857 | 41336946 | . | + | . | gene_id | "XLOC_209086"; | transcript_id | "Novel_002899"; | exon_number | "2";  | gene_type | " |
| Dt_chr7 | Cufflinks | exon | 41337595 | 41337660 | . | + | . | gene_id | "XLOC_209086"; | transcript_id | "Novel_002899"; | exon_number | "3";  | gene_type | " |
| Dt_chr7 | Cufflinks | exon | 41337744 | 41337874 | . | + | . | gene_id | "XLOC_209086"; | transcript_id | "Novel_002899"; | exon_number | "4";  | gene_type | " |
| Dt_chr7 | Cufflinks | exon | 41335937 | 41336946 | . | + | . | gene_id | "XLOC_209086"; | transcript_id | "Novel_002900"; | exon_number | "1";  | gene_type | " |
| Dt_chr7 | Cufflinks | exon | 41337595 | 41337992 | . | + | . | gene_id | "XLOC_209086"; | transcript_id | "Novel_002900"; | exon_number | "2";  | gene_type | " |
| Dt_chr7 | Cufflinks | exon | 43298749 | 43298789 | . | + | . | gene_id | "XLOC_209191"; | transcript_id | "Novel_002901"; | exon_number | "1";  | gene_type | " |
| Dt_chr7 | Cufflinks | exon | 43298870 | 43299378 | . | + | . | gene_id | "XLOC_209191"; | transcript_id | "Novel_002901"; | exon_number | "2";  | gene_type | " |
| Dt_chr7 | Cufflinks | exon | 789369   | 790124   | . | - | . | gene_id | "XLOC_209491"; | transcript_id | "Novel_002902"; | exon_number | "1";  | gene_type | " |
| Dt_chr7 | Cufflinks | exon | 791356   | 791689   | . | - | . | gene_id | "XLOC_209491"; | transcript_id | "Novel_002902"; | exon_number | "2";  | gene_type | " |
| Dt_chr7 | Cufflinks | exon | 1046703  | 1046866  | . | - | . | gene_id | "XLOC_209507"; | transcript_id | "Novel_002903"; | exon_number | "1";  | gene_type | " |
| Dt_chr7 | Cufflinks | exon | 1047320  | 1047383  | . | - | . | gene_id | "XLOC_209507"; | transcript_id | "Novel_002903"; | exon_number | "2";  | gene_type | " |
| Dt_chr7 | Cufflinks | exon | 1047464  | 1047541  | . | - | . | gene_id | "XLOC_209507"; | transcript_id | "Novel_002903"; | exon_number | "3";  | gene_type | " |
| Dt_chr7 | Cufflinks | exon | 1047612  | 1047671  | . | - | . | gene_id | "XLOC_209507"; | transcript_id | "Novel_002903"; | exon_number | "4";  | gene_type | " |
| Dt_chr7 | Cufflinks | exon | 1047851  | 1047925  | . | - | . | gene_id | "XLOC_209507"; | transcript_id | "Novel_002903"; | exon_number | "5";  | gene_type | " |
| Dt_chr7 | Cufflinks | exon | 1048030  | 1048259  | . | - | . | gene_id | "XLOC_209507"; | transcript_id | "Novel_002903"; | exon_number | "6";  | gene_type | " |
| Dt_chr7 | Cufflinks | exon | 1053188  | 1053299  | . | - | . | gene_id | "XLOC_209507"; | transcript_id | "Novel_002903"; | exon_number | "7";  | gene_type | " |
| Dt_chr7 | Cufflinks | exon | 1693734  | 1694633  | . | - | . | gene_id | "XLOC_209546"; | transcript_id | "Novel_002904"; | exon_number | "1";  | gene_type | " |
| Dt_chr7 | Cufflinks | exon | 1694759  | 1695075  | . | - | . | gene_id | "XLOC_209546"; | transcript_id | "Novel_002904"; | exon_number | "2";  | gene_type | " |
| Dt_chr7 | Cufflinks | exon | 1695330  | 1695397  | . | - | . | gene_id | "XLOC_209546"; | transcript_id | "Novel_002904"; | exon_number | "3";  | gene_type | " |
| Dt_chr7 | Cufflinks | exon | 1695605  | 1695697  | . | - | . | gene_id | "XLOC_209546"; | transcript_id | "Novel_002904"; | exon_number | "4";  | gene_type | " |
| Dt_chr7 | Cufflinks | exon | 1695839  | 1696049  | . | - | . | gene_id | "XLOC_209546"; | transcript_id | "Novel_002904"; | exon_number | "5";  | gene_type | " |
| Dt_chr7 | Cufflinks | exon | 1748405  | 1748966  | . | - | . | gene_id | "XLOC_209559"; | transcript_id | "Novel_002905"; | exon_number | "1";  | gene_type | " |
| Dt_chr7 | Cufflinks | exon | 1749094  | 1749177  | . | - | . | gene_id | "XLOC_209559"; | transcript_id | "Novel_002905"; | exon_number | "2";  | gene_type | " |
| Dt_chr7 | Cufflinks | exon | 1749520  | 1749590  | . | - | . | gene_id | "XLOC_209559"; | transcript_id | "Novel_002905"; | exon_number | "3";  | gene_type | " |
| Dt_chr7 | Cufflinks | exon | 1749938  | 1750080  | . | - | . | gene_id | "XLOC_209559"; | transcript_id | "Novel_002905"; | exon_number | "4";  | gene_type | " |
| Dt_chr7 | Cufflinks | exon | 1750194  | 1750286  | . | - | . | gene_id | "XLOC_209559"; | transcript_id | "Novel_002905"; | exon_number | "5";  | gene_type | " |
| Dt_chr7 | Cufflinks | exon | 1750427  | 1750480  | . | - | . | gene_id | "XLOC_209559"; | transcript_id | "Novel_002905"; | exon_number | "6";  | gene_type | " |
| Dt_chr7 | Cufflinks | exon | 1750693  | 1750855  | . | - | . | gene_id | "XLOC_209559"; | transcript_id | "Novel_002905"; | exon_number | "7";  | gene_type | " |
| Dt_chr7 | Cufflinks | exon | 1751103  | 1751137  | . | - | . | gene_id | "XLOC_209559"; | transcript_id | "Novel_002905"; | exon_number | "8";  | gene_type | " |
| Dt_chr7 | Cufflinks | exon | 1751372  | 1751554  | . | - | . | gene_id | "XLOC_209559"; | transcript_id | "Novel_002905"; | exon_number | "9";  | gene_type | " |
| Dt_chr7 | Cufflinks | exon | 1751692  | 1751843  | . | - | . | gene_id | "XLOC_209559"; | transcript_id | "Novel_002905"; | exon_number | "10"; | gene_type | " |
| Dt_chr7 | Cufflinks | exon | 1752011  | 1752127  | . | - | . | gene_id | "XLOC_209559"; | transcript_id | "Novel_002905"; | exon_number | "11"; | gene_type | " |

|         |           |      |         |         |   |   |   |         |                |               |                 |             |       |           |   |
|---------|-----------|------|---------|---------|---|---|---|---------|----------------|---------------|-----------------|-------------|-------|-----------|---|
| Dt_chr7 | Cufflinks | exon | 1752334 | 1752438 | . | - | . | gene_id | "XLOC_209559"; | transcript_id | "Novel_002905"; | exon_number | "12"; | gene_type |   |
| Dt_chr7 | Cufflinks | exon | 1752597 | 1752755 | . | - | . | gene_id | "XLOC_209559"; | transcript_id | "Novel_002905"; | exon_number | "13"; | gene_type |   |
| Dt_chr7 | Cufflinks | exon | 1753735 | 1754008 | . | - | . | gene_id | "XLOC_209559"; | transcript_id | "Novel_002905"; | exon_number | "14"; | gene_type |   |
| Dt_chr7 | Cufflinks | exon | 1748694 | 1748966 | . | - | . | gene_id | "XLOC_209559"; | transcript_id | "Novel_002906"; | exon_number | "1";  | gene_type | " |
| Dt_chr7 | Cufflinks | exon | 1749094 | 1749177 | . | - | . | gene_id | "XLOC_209559"; | transcript_id | "Novel_002906"; | exon_number | "2";  | gene_type | " |
| Dt_chr7 | Cufflinks | exon | 1749520 | 1750080 | . | - | . | gene_id | "XLOC_209559"; | transcript_id | "Novel_002906"; | exon_number | "3";  | gene_type | " |
| Dt_chr7 | Cufflinks | exon | 1750194 | 1750286 | . | - | . | gene_id | "XLOC_209559"; | transcript_id | "Novel_002906"; | exon_number | "4";  | gene_type | " |
| Dt_chr7 | Cufflinks | exon | 1750427 | 1750480 | . | - | . | gene_id | "XLOC_209559"; | transcript_id | "Novel_002906"; | exon_number | "5";  | gene_type | " |
| Dt_chr7 | Cufflinks | exon | 1750693 | 1750855 | . | - | . | gene_id | "XLOC_209559"; | transcript_id | "Novel_002906"; | exon_number | "6";  | gene_type | " |
| Dt_chr7 | Cufflinks | exon | 1751103 | 1751137 | . | - | . | gene_id | "XLOC_209559"; | transcript_id | "Novel_002906"; | exon_number | "7";  | gene_type | " |
| Dt_chr7 | Cufflinks | exon | 1751372 | 1751554 | . | - | . | gene_id | "XLOC_209559"; | transcript_id | "Novel_002906"; | exon_number | "8";  | gene_type | " |
| Dt_chr7 | Cufflinks | exon | 1751692 | 1751843 | . | - | . | gene_id | "XLOC_209559"; | transcript_id | "Novel_002906"; | exon_number | "9";  | gene_type | " |
| Dt_chr7 | Cufflinks | exon | 1752011 | 1752127 | . | - | . | gene_id | "XLOC_209559"; | transcript_id | "Novel_002906"; | exon_number | "10"; | gene_type | " |
| Dt_chr7 | Cufflinks | exon | 1752334 | 1753650 | . | - | . | gene_id | "XLOC_209559"; | transcript_id | "Novel_002906"; | exon_number | "11"; | gene_type | " |
| Dt_chr7 | Cufflinks | exon | 2986727 | 2987473 | . | - | . | gene_id | "XLOC_209763"; | transcript_id | "Novel_002907"; | exon_number | "1";  | gene_type | " |
| Dt_chr7 | Cufflinks | exon | 2987990 | 2988485 | . | - | . | gene_id | "XLOC_209763"; | transcript_id | "Novel_002907"; | exon_number | "2";  | gene_type | " |
| Dt_chr7 | Cufflinks | exon | 3280069 | 3280408 | . | - | . | gene_id | "XLOC_209827"; | transcript_id | "Novel_002908"; | exon_number | "1";  | gene_type | " |
| Dt_chr7 | Cufflinks | exon | 3280489 | 3280535 | . | - | . | gene_id | "XLOC_209827"; | transcript_id | "Novel_002908"; | exon_number | "2";  | gene_type | " |
| Dt_chr7 | Cufflinks | exon | 3280634 | 3280770 | . | - | . | gene_id | "XLOC_209827"; | transcript_id | "Novel_002908"; | exon_number | "3";  | gene_type | " |
| Dt_chr7 | Cufflinks | exon | 3280899 | 3280942 | . | - | . | gene_id | "XLOC_209827"; | transcript_id | "Novel_002908"; | exon_number | "4";  | gene_type | " |
| Dt_chr7 | Cufflinks | exon | 3421259 | 3421841 | . | - | . | gene_id | "XLOC_209854"; | transcript_id | "Novel_002909"; | exon_number | "1";  | gene_type | " |
| Dt_chr7 | Cufflinks | exon | 3422127 | 3422327 | . | - | . | gene_id | "XLOC_209854"; | transcript_id | "Novel_002909"; | exon_number | "2";  | gene_type | " |
| Dt_chr7 | Cufflinks | exon | 3422438 | 3424259 | . | - | . | gene_id | "XLOC_209854"; | transcript_id | "Novel_002909"; | exon_number | "3";  | gene_type | " |
| Dt_chr7 | Cufflinks | exon | 3424337 | 3424610 | . | - | . | gene_id | "XLOC_209854"; | transcript_id | "Novel_002909"; | exon_number | "4";  | gene_type | " |
| Dt_chr7 | Cufflinks | exon | 3426418 | 3428131 | . | - | . | gene_id | "XLOC_209854"; | transcript_id | "Novel_002909"; | exon_number | "5";  | gene_type | " |
| Dt_chr7 | Cufflinks | exon | 3424196 | 3424610 | . | - | . | gene_id | "XLOC_209854"; | transcript_id | "Novel_002910"; | exon_number | "1";  | gene_type | " |
| Dt_chr7 | Cufflinks | exon | 3426418 | 3428143 | . | - | . | gene_id | "XLOC_209854"; | transcript_id | "Novel_002910"; | exon_number | "2";  | gene_type | " |
| Dt_chr7 | Cufflinks | exon | 3722297 | 3723392 | . | - | . | gene_id | "XLOC_209906"; | transcript_id | "Novel_002911"; | exon_number | "1";  | gene_type | " |
| Dt_chr7 | Cufflinks | exon | 3723559 | 3723889 | . | - | . | gene_id | "XLOC_209906"; | transcript_id | "Novel_002911"; | exon_number | "2";  | gene_type | " |
| Dt_chr7 | Cufflinks | exon | 3722558 | 3722793 | . | - | . | gene_id | "XLOC_209906"; | transcript_id | "Novel_002912"; | exon_number | "1";  | gene_type | " |
| Dt_chr7 | Cufflinks | exon | 3723270 | 3723392 | . | - | . | gene_id | "XLOC_209906"; | transcript_id | "Novel_002912"; | exon_number | "2";  | gene_type | " |
| Dt_chr7 | Cufflinks | exon | 3723559 | 3723844 | . | - | . | gene_id | "XLOC_209906"; | transcript_id | "Novel_002912"; | exon_number | "3";  | gene_type | " |
| Dt_chr7 | Cufflinks | exon | 3746336 | 3747258 | . | - | . | gene_id | "XLOC_209921"; | transcript_id | "Novel_002913"; | exon_number | "1";  | gene_type | " |
| Dt_chr7 | Cufflinks | exon | 3747343 | 3748125 | . | - | . | gene_id | "XLOC_209921"; | transcript_id | "Novel_002913"; | exon_number | "2";  | gene_type | " |
| Dt_chr7 | Cufflinks | exon | 3748209 | 3748346 | . | - | . | gene_id | "XLOC_209921"; | transcript_id | "Novel_002913"; | exon_number | "3";  | gene_type | " |

|         |           |      |         |         |   |   |         |                |               |                 |             |      |           |   |
|---------|-----------|------|---------|---------|---|---|---------|----------------|---------------|-----------------|-------------|------|-----------|---|
| Dt_chr7 | Cufflinks | exon | 3748461 | 3748533 | . | . | gene_id | "XLOC_209921"; | transcript_id | "Novel_002913"; | exon_number | "4"; | gene_type | " |
| Dt_chr7 | Cufflinks | exon | 3748628 | 3749476 | . | . | gene_id | "XLOC_209921"; | transcript_id | "Novel_002913"; | exon_number | "5"; | gene_type | " |
| Dt_chr7 | Cufflinks | exon | 3751405 | 3751499 | . | . | gene_id | "XLOC_209921"; | transcript_id | "Novel_002913"; | exon_number | "6"; | gene_type | " |
| Dt_chr7 | Cufflinks | exon | 3751608 | 3751670 | . | . | gene_id | "XLOC_209921"; | transcript_id | "Novel_002913"; | exon_number | "7"; | gene_type | " |
| Dt_chr7 | Cufflinks | exon | 3752320 | 3752630 | . | . | gene_id | "XLOC_209921"; | transcript_id | "Novel_002913"; | exon_number | "8"; | gene_type | " |
| Dt_chr7 | Cufflinks | exon | 3880893 | 3881156 | . | . | gene_id | "XLOC_209942"; | transcript_id | "Novel_002914"; | exon_number | "1"; | gene_type | " |
| Dt_chr7 | Cufflinks | exon | 3881259 | 3881417 | . | . | gene_id | "XLOC_209942"; | transcript_id | "Novel_002914"; | exon_number | "2"; | gene_type | " |
| Dt_chr7 | Cufflinks | exon | 3881513 | 3881872 | . | . | gene_id | "XLOC_209942"; | transcript_id | "Novel_002914"; | exon_number | "3"; | gene_type | " |
| Dt_chr7 | Cufflinks | exon | 3880926 | 3881417 | . | . | gene_id | "XLOC_209942"; | transcript_id | "Novel_002915"; | exon_number | "1"; | gene_type | " |
| Dt_chr7 | Cufflinks | exon | 3881513 | 3881692 | . | . | gene_id | "XLOC_209942"; | transcript_id | "Novel_002915"; | exon_number | "2"; | gene_type | " |
| Dt_chr7 | Cufflinks | exon | 3888525 | 3888891 | . | . | gene_id | "XLOC_209944"; | transcript_id | "Novel_002916"; | exon_number | "1"; | gene_type | " |
| Dt_chr7 | Cufflinks | exon | 3889012 | 3889417 | . | . | gene_id | "XLOC_209944"; | transcript_id | "Novel_002916"; | exon_number | "2"; | gene_type | " |
| Dt_chr7 | Cufflinks | exon | 3889529 | 3890023 | . | . | gene_id | "XLOC_209944"; | transcript_id | "Novel_002916"; | exon_number | "3"; | gene_type | " |
| Dt_chr7 | Cufflinks | exon | 3888526 | 3888891 | . | . | gene_id | "XLOC_209944"; | transcript_id | "Novel_002917"; | exon_number | "1"; | gene_type | " |
| Dt_chr7 | Cufflinks | exon | 3889012 | 3889164 | . | . | gene_id | "XLOC_209944"; | transcript_id | "Novel_002917"; | exon_number | "2"; | gene_type | " |
| Dt_chr7 | Cufflinks | exon | 3889280 | 3889417 | . | . | gene_id | "XLOC_209944"; | transcript_id | "Novel_002917"; | exon_number | "3"; | gene_type | " |
| Dt_chr7 | Cufflinks | exon | 3889529 | 3889950 | . | . | gene_id | "XLOC_209944"; | transcript_id | "Novel_002917"; | exon_number | "4"; | gene_type | " |
| Dt_chr7 | Cufflinks | exon | 3888526 | 3888891 | . | . | gene_id | "XLOC_209944"; | transcript_id | "Novel_002918"; | exon_number | "1"; | gene_type | " |
| Dt_chr7 | Cufflinks | exon | 3889012 | 3889164 | . | . | gene_id | "XLOC_209944"; | transcript_id | "Novel_002918"; | exon_number | "2"; | gene_type | " |
| Dt_chr7 | Cufflinks | exon | 3889293 | 3889417 | . | . | gene_id | "XLOC_209944"; | transcript_id | "Novel_002918"; | exon_number | "3"; | gene_type | " |
| Dt_chr7 | Cufflinks | exon | 3889529 | 3890002 | . | . | gene_id | "XLOC_209944"; | transcript_id | "Novel_002918"; | exon_number | "4"; | gene_type | " |
| Dt_chr7 | Cufflinks | exon | 3888983 | 3889164 | . | . | gene_id | "XLOC_209944"; | transcript_id | "Novel_002919"; | exon_number | "1"; | gene_type | " |
| Dt_chr7 | Cufflinks | exon | 3889280 | 3889417 | . | . | gene_id | "XLOC_209944"; | transcript_id | "Novel_002919"; | exon_number | "2"; | gene_type | " |
| Dt_chr7 | Cufflinks | exon | 3889529 | 3890002 | . | . | gene_id | "XLOC_209944"; | transcript_id | "Novel_002919"; | exon_number | "3"; | gene_type | " |
| Dt_chr7 | Cufflinks | exon | 3911978 | 3912654 | . | . | gene_id | "XLOC_209950"; | transcript_id | "Novel_002920"; | exon_number | "1"; | gene_type | " |
| Dt_chr7 | Cufflinks | exon | 3912818 | 3912883 | . | . | gene_id | "XLOC_209950"; | transcript_id | "Novel_002920"; | exon_number | "2"; | gene_type | " |
| Dt_chr7 | Cufflinks | exon | 3913386 | 3913688 | . | . | gene_id | "XLOC_209950"; | transcript_id | "Novel_002920"; | exon_number | "3"; | gene_type | " |
| Dt_chr7 | Cufflinks | exon | 3914043 | 3914163 | . | . | gene_id | "XLOC_209950"; | transcript_id | "Novel_002920"; | exon_number | "4"; | gene_type | " |
| Dt_chr7 | Cufflinks | exon | 3914389 | 3914469 | . | . | gene_id | "XLOC_209950"; | transcript_id | "Novel_002920"; | exon_number | "5"; | gene_type | " |
| Dt_chr7 | Cufflinks | exon | 3914564 | 3914900 | . | . | gene_id | "XLOC_209950"; | transcript_id | "Novel_002920"; | exon_number | "6"; | gene_type | " |
| Dt_chr7 | Cufflinks | exon | 3950417 | 3952041 | . | . | gene_id | "XLOC_209957"; | transcript_id | "Novel_002921"; | exon_number | "1"; | gene_type | " |
| Dt_chr7 | Cufflinks | exon | 3952123 | 3953816 | . | . | gene_id | "XLOC_209957"; | transcript_id | "Novel_002921"; | exon_number | "2"; | gene_type | " |
| Dt_chr7 | Cufflinks | exon | 4005843 | 4006452 | . | . | gene_id | "XLOC_209967"; | transcript_id | "Novel_002922"; | exon_number | "1"; | gene_type | " |
| Dt_chr7 | Cufflinks | exon | 4006801 | 4007058 | . | . | gene_id | "XLOC_209967"; | transcript_id | "Novel_002922"; | exon_number | "2"; | gene_type | " |
| Dt_chr7 | Cufflinks | exon | 4007431 | 4007473 | . | . | gene_id | "XLOC_209967"; | transcript_id | "Novel_002922"; | exon_number | "3"; | gene_type | " |



|         |           |      |         |         |   |   |         |                |               |                 |             |      |           |   |
|---------|-----------|------|---------|---------|---|---|---------|----------------|---------------|-----------------|-------------|------|-----------|---|
| Dt_chr7 | Cufflinks | exon | 4007569 | 4007693 | . | . | gene_id | "XLOC_209967"; | transcript_id | "Novel_002922"; | exon_number | "4"; | gene_type | " |
| Dt_chr7 | Cufflinks | exon | 4007788 | 4007877 | . | . | gene_id | "XLOC_209967"; | transcript_id | "Novel_002922"; | exon_number | "5"; | gene_type | " |
| Dt_chr7 | Cufflinks | exon | 4008165 | 4008679 | . | . | gene_id | "XLOC_209967"; | transcript_id | "Novel_002922"; | exon_number | "6"; | gene_type | " |
| Dt_chr7 | Cufflinks | exon | 4006067 | 4006452 | . | . | gene_id | "XLOC_209967"; | transcript_id | "Novel_002923"; | exon_number | "1"; | gene_type | " |
| Dt_chr7 | Cufflinks | exon | 4006801 | 4007058 | . | . | gene_id | "XLOC_209967"; | transcript_id | "Novel_002923"; | exon_number | "2"; | gene_type | " |
| Dt_chr7 | Cufflinks | exon | 4007431 | 4007473 | . | . | gene_id | "XLOC_209967"; | transcript_id | "Novel_002923"; | exon_number | "3"; | gene_type | " |
| Dt_chr7 | Cufflinks | exon | 4007569 | 4007693 | . | . | gene_id | "XLOC_209967"; | transcript_id | "Novel_002923"; | exon_number | "4"; | gene_type | " |
| Dt_chr7 | Cufflinks | exon | 4007788 | 4007877 | . | . | gene_id | "XLOC_209967"; | transcript_id | "Novel_002923"; | exon_number | "5"; | gene_type | " |
| Dt_chr7 | Cufflinks | exon | 4008393 | 4008659 | . | . | gene_id | "XLOC_209967"; | transcript_id | "Novel_002923"; | exon_number | "6"; | gene_type | " |
| Dt_chr7 | Cufflinks | exon | 4006098 | 4006452 | . | . | gene_id | "XLOC_209967"; | transcript_id | "Novel_002924"; | exon_number | "1"; | gene_type | " |
| Dt_chr7 | Cufflinks | exon | 4006801 | 4007397 | . | . | gene_id | "XLOC_209967"; | transcript_id | "Novel_002924"; | exon_number | "2"; | gene_type | " |
| Dt_chr7 | Cufflinks | exon | 4031139 | 4031651 | . | . | gene_id | "XLOC_209972"; | transcript_id | "Novel_002925"; | exon_number | "1"; | gene_type | " |
| Dt_chr7 | Cufflinks | exon | 4032301 | 4032344 | . | . | gene_id | "XLOC_209972"; | transcript_id | "Novel_002925"; | exon_number | "2"; | gene_type | " |
| Dt_chr7 | Cufflinks | exon | 4184846 | 4185847 | . | . | gene_id | "XLOC_210011"; | transcript_id | "Novel_002926"; | exon_number | "1"; | gene_type | " |
| Dt_chr7 | Cufflinks | exon | 4185970 | 4186074 | . | . | gene_id | "XLOC_210011"; | transcript_id | "Novel_002926"; | exon_number | "2"; | gene_type | " |
| Dt_chr7 | Cufflinks | exon | 4186171 | 4186183 | . | . | gene_id | "XLOC_210011"; | transcript_id | "Novel_002926"; | exon_number | "3"; | gene_type | " |
| Dt_chr7 | Cufflinks | exon | 4186356 | 4186452 | . | . | gene_id | "XLOC_210011"; | transcript_id | "Novel_002927"; | exon_number | "1"; | gene_type | " |
| Dt_chr7 | Cufflinks | exon | 4187115 | 4187347 | . | . | gene_id | "XLOC_210011"; | transcript_id | "Novel_002927"; | exon_number | "2"; | gene_type | " |
| Dt_chr7 | Cufflinks | exon | 4188246 | 4188437 | . | . | gene_id | "XLOC_210011"; | transcript_id | "Novel_002927"; | exon_number | "3"; | gene_type | " |
| Dt_chr7 | Cufflinks | exon | 4188568 | 4188748 | . | . | gene_id | "XLOC_210011"; | transcript_id | "Novel_002927"; | exon_number | "4"; | gene_type | " |
| Dt_chr7 | Cufflinks | exon | 4188835 | 4189034 | . | . | gene_id | "XLOC_210011"; | transcript_id | "Novel_002927"; | exon_number | "5"; | gene_type | " |
| Dt_chr7 | Cufflinks | exon | 4189476 | 4190219 | . | . | gene_id | "XLOC_210011"; | transcript_id | "Novel_002927"; | exon_number | "6"; | gene_type | " |
| Dt_chr7 | Cufflinks | exon | 4187394 | 4188437 | . | . | gene_id | "XLOC_210011"; | transcript_id | "Novel_002928"; | exon_number | "1"; | gene_type | " |
| Dt_chr7 | Cufflinks | exon | 4188568 | 4188748 | . | . | gene_id | "XLOC_210011"; | transcript_id | "Novel_002928"; | exon_number | "2"; | gene_type | " |
| Dt_chr7 | Cufflinks | exon | 4188835 | 4189034 | . | . | gene_id | "XLOC_210011"; | transcript_id | "Novel_002928"; | exon_number | "3"; | gene_type | " |
| Dt_chr7 | Cufflinks | exon | 4189476 | 4190202 | . | . | gene_id | "XLOC_210011"; | transcript_id | "Novel_002928"; | exon_number | "4"; | gene_type | " |
| Dt_chr7 | Cufflinks | exon | 4280770 | 4281718 | . | . | gene_id | "XLOC_210027"; | transcript_id | "Novel_002929"; | exon_number | "1"; | gene_type | " |
| Dt_chr7 | Cufflinks | exon | 4454151 | 4454292 | . | . | gene_id | "XLOC_210055"; | transcript_id | "Novel_002930"; | exon_number | "1"; | gene_type | " |
| Dt_chr7 | Cufflinks | exon | 4454467 | 4454594 | . | . | gene_id | "XLOC_210055"; | transcript_id | "Novel_002930"; | exon_number | "2"; | gene_type | " |
| Dt_chr7 | Cufflinks | exon | 4801824 | 4803300 | . | . | gene_id | "XLOC_210124"; | transcript_id | "Novel_002931"; | exon_number | "1"; | gene_type | " |
| Dt_chr7 | Cufflinks | exon | 4803804 | 4804979 | . | . | gene_id | "XLOC_210124"; | transcript_id | "Novel_002931"; | exon_number | "2"; | gene_type | " |
| Dt_chr7 | Cufflinks | exon | 5034898 | 5035686 | . | . | gene_id | "XLOC_210165"; | transcript_id | "Novel_002932"; | exon_number | "1"; | gene_type | " |
| Dt_chr7 | Cufflinks | exon | 5035777 | 5035873 | . | . | gene_id | "XLOC_210165"; | transcript_id | "Novel_002932"; | exon_number | "2"; | gene_type | " |
| Dt_chr7 | Cufflinks | exon | 5035971 | 5036118 | . | . | gene_id | "XLOC_210165"; | transcript_id | "Novel_002932"; | exon_number | "3"; | gene_type | " |
| Dt_chr7 | Cufflinks | exon | 5036252 | 5036635 | . | . | gene_id | "XLOC_210165"; | transcript_id | "Novel_002932"; | exon_number | "4"; | gene_type | " |

|         |           |      |         |         |   |   |         |                |               |                 |             |       |           |   |
|---------|-----------|------|---------|---------|---|---|---------|----------------|---------------|-----------------|-------------|-------|-----------|---|
| Dt_chr7 | Cufflinks | exon | 5034898 | 5035873 | . | . | gene_id | "XLOC_210165"; | transcript_id | "Novel_002933"; | exon_number | "1";  | gene_type | " |
| Dt_chr7 | Cufflinks | exon | 5035971 | 5036118 | . | . | gene_id | "XLOC_210165"; | transcript_id | "Novel_002933"; | exon_number | "2";  | gene_type | " |
| Dt_chr7 | Cufflinks | exon | 5036252 | 5036635 | . | . | gene_id | "XLOC_210165"; | transcript_id | "Novel_002933"; | exon_number | "3";  | gene_type | " |
| Dt_chr7 | Cufflinks | exon | 5063431 | 5064177 | . | . | gene_id | "XLOC_210168"; | transcript_id | "Novel_002934"; | exon_number | "1";  | gene_type | " |
| Dt_chr7 | Cufflinks | exon | 5064272 | 5064313 | . | . | gene_id | "XLOC_210168"; | transcript_id | "Novel_002934"; | exon_number | "2";  | gene_type | " |
| Dt_chr7 | Cufflinks | exon | 5064397 | 5064498 | . | . | gene_id | "XLOC_210168"; | transcript_id | "Novel_002934"; | exon_number | "3";  | gene_type | " |
| Dt_chr7 | Cufflinks | exon | 5064582 | 5064680 | . | . | gene_id | "XLOC_210168"; | transcript_id | "Novel_002934"; | exon_number | "4";  | gene_type | " |
| Dt_chr7 | Cufflinks | exon | 5065077 | 5065137 | . | . | gene_id | "XLOC_210168"; | transcript_id | "Novel_002934"; | exon_number | "5";  | gene_type | " |
| Dt_chr7 | Cufflinks | exon | 5065286 | 5065407 | . | . | gene_id | "XLOC_210168"; | transcript_id | "Novel_002934"; | exon_number | "6";  | gene_type | " |
| Dt_chr7 | Cufflinks | exon | 5065507 | 5065592 | . | . | gene_id | "XLOC_210168"; | transcript_id | "Novel_002934"; | exon_number | "7";  | gene_type | " |
| Dt_chr7 | Cufflinks | exon | 5065748 | 5065832 | . | . | gene_id | "XLOC_210168"; | transcript_id | "Novel_002934"; | exon_number | "8";  | gene_type | " |
| Dt_chr7 | Cufflinks | exon | 5066026 | 5066532 | . | . | gene_id | "XLOC_210168"; | transcript_id | "Novel_002934"; | exon_number | "9";  | gene_type | " |
| Dt_chr7 | Cufflinks | exon | 5066633 | 5066701 | . | . | gene_id | "XLOC_210168"; | transcript_id | "Novel_002934"; | exon_number | "10"; | gene_type | " |
| Dt_chr7 | Cufflinks | exon | 5066809 | 5066889 | . | . | gene_id | "XLOC_210168"; | transcript_id | "Novel_002934"; | exon_number | "11"; | gene_type | " |
| Dt_chr7 | Cufflinks | exon | 5066980 | 5067172 | . | . | gene_id | "XLOC_210168"; | transcript_id | "Novel_002934"; | exon_number | "12"; | gene_type | " |
| Dt_chr7 | Cufflinks | exon | 5073249 | 5073449 | . | . | gene_id | "XLOC_210170"; | transcript_id | "Novel_002935"; | exon_number | "1";  | gene_type | " |
| Dt_chr7 | Cufflinks | exon | 5073915 | 5074033 | . | . | gene_id | "XLOC_210170"; | transcript_id | "Novel_002935"; | exon_number | "2";  | gene_type | " |
| Dt_chr7 | Cufflinks | exon | 5074375 | 5074426 | . | . | gene_id | "XLOC_210170"; | transcript_id | "Novel_002935"; | exon_number | "3";  | gene_type | " |
| Dt_chr7 | Cufflinks | exon | 5180464 | 5181095 | . | . | gene_id | "XLOC_210177"; | transcript_id | "Novel_002936"; | exon_number | "1";  | gene_type | " |
| Dt_chr7 | Cufflinks | exon | 5181388 | 5181512 | . | . | gene_id | "XLOC_210177"; | transcript_id | "Novel_002936"; | exon_number | "2";  | gene_type | " |
| Dt_chr7 | Cufflinks | exon | 5181988 | 5182048 | . | . | gene_id | "XLOC_210177"; | transcript_id | "Novel_002936"; | exon_number | "3";  | gene_type | " |
| Dt_chr7 | Cufflinks | exon | 5182157 | 5182273 | . | . | gene_id | "XLOC_210177"; | transcript_id | "Novel_002936"; | exon_number | "4";  | gene_type | " |
| Dt_chr7 | Cufflinks | exon | 5182415 | 5182513 | . | . | gene_id | "XLOC_210177"; | transcript_id | "Novel_002936"; | exon_number | "5";  | gene_type | " |
| Dt_chr7 | Cufflinks | exon | 5182687 | 5183834 | . | . | gene_id | "XLOC_210177"; | transcript_id | "Novel_002936"; | exon_number | "6";  | gene_type | " |
| Dt_chr7 | Cufflinks | exon | 5180636 | 5181095 | . | . | gene_id | "XLOC_210177"; | transcript_id | "Novel_002937"; | exon_number | "1";  | gene_type | " |
| Dt_chr7 | Cufflinks | exon | 5181388 | 5181528 | . | . | gene_id | "XLOC_210177"; | transcript_id | "Novel_002937"; | exon_number | "2";  | gene_type | " |
| Dt_chr7 | Cufflinks | exon | 5181988 | 5182048 | . | . | gene_id | "XLOC_210177"; | transcript_id | "Novel_002937"; | exon_number | "3";  | gene_type | " |
| Dt_chr7 | Cufflinks | exon | 5182157 | 5182273 | . | . | gene_id | "XLOC_210177"; | transcript_id | "Novel_002937"; | exon_number | "4";  | gene_type | " |
| Dt_chr7 | Cufflinks | exon | 5182415 | 5182513 | . | . | gene_id | "XLOC_210177"; | transcript_id | "Novel_002937"; | exon_number | "5";  | gene_type | " |
| Dt_chr7 | Cufflinks | exon | 5182687 | 5183812 | . | . | gene_id | "XLOC_210177"; | transcript_id | "Novel_002937"; | exon_number | "6";  | gene_type | " |
| Dt_chr7 | Cufflinks | exon | 5232848 | 5233290 | . | . | gene_id | "XLOC_210184"; | transcript_id | "Novel_002938"; | exon_number | "1";  | gene_type | " |
| Dt_chr7 | Cufflinks | exon | 5233376 | 5233456 | . | . | gene_id | "XLOC_210184"; | transcript_id | "Novel_002938"; | exon_number | "2";  | gene_type | " |
| Dt_chr7 | Cufflinks | exon | 5233578 | 5233653 | . | . | gene_id | "XLOC_210184"; | transcript_id | "Novel_002938"; | exon_number | "3";  | gene_type | " |
| Dt_chr7 | Cufflinks | exon | 5233785 | 5233833 | . | . | gene_id | "XLOC_210184"; | transcript_id | "Novel_002938"; | exon_number | "4";  | gene_type | " |
| Dt_chr7 | Cufflinks | exon | 5234265 | 5234388 | . | . | gene_id | "XLOC_210184"; | transcript_id | "Novel_002938"; | exon_number | "5";  | gene_type | " |

|         |           |      |         |         |   |   |         |                              |                             |                |   |
|---------|-----------|------|---------|---------|---|---|---------|------------------------------|-----------------------------|----------------|---|
| Dt_chr7 | Cufflinks | exon | 5456095 | 5456594 | . | . | gene_id | "XLOC_210208"; transcript_id | "Novel_002939"; exon_number | "1"; gene_type | " |
| Dt_chr7 | Cufflinks | exon | 5456687 | 5456882 | . | . | gene_id | "XLOC_210208"; transcript_id | "Novel_002939"; exon_number | "2"; gene_type | " |
| Dt_chr7 | Cufflinks | exon | 5512102 | 5513302 | . | . | gene_id | "XLOC_210216"; transcript_id | "Novel_002940"; exon_number | "1"; gene_type | " |
| Dt_chr7 | Cufflinks | exon | 5513384 | 5513513 | . | . | gene_id | "XLOC_210216"; transcript_id | "Novel_002940"; exon_number | "2"; gene_type | " |
| Dt_chr7 | Cufflinks | exon | 5513778 | 5514010 | . | . | gene_id | "XLOC_210216"; transcript_id | "Novel_002940"; exon_number | "3"; gene_type | " |
| Dt_chr7 | Cufflinks | exon | 5514110 | 5514147 | . | . | gene_id | "XLOC_210216"; transcript_id | "Novel_002940"; exon_number | "4"; gene_type | " |
| Dt_chr7 | Cufflinks | exon | 5514233 | 5514572 | . | . | gene_id | "XLOC_210216"; transcript_id | "Novel_002940"; exon_number | "5"; gene_type | " |
| Dt_chr7 | Cufflinks | exon | 5512988 | 5513302 | . | . | gene_id | "XLOC_210216"; transcript_id | "Novel_002941"; exon_number | "1"; gene_type | " |
| Dt_chr7 | Cufflinks | exon | 5513384 | 5513513 | . | . | gene_id | "XLOC_210216"; transcript_id | "Novel_002941"; exon_number | "2"; gene_type | " |
| Dt_chr7 | Cufflinks | exon | 5513778 | 5514010 | . | . | gene_id | "XLOC_210216"; transcript_id | "Novel_002941"; exon_number | "3"; gene_type | " |
| Dt_chr7 | Cufflinks | exon | 5514110 | 5514557 | . | . | gene_id | "XLOC_210216"; transcript_id | "Novel_002941"; exon_number | "4"; gene_type | " |
| Dt_chr7 | Cufflinks | exon | 5512988 | 5513302 | . | . | gene_id | "XLOC_210216"; transcript_id | "Novel_002942"; exon_number | "1"; gene_type | " |
| Dt_chr7 | Cufflinks | exon | 5513384 | 5513513 | . | . | gene_id | "XLOC_210216"; transcript_id | "Novel_002942"; exon_number | "2"; gene_type | " |
| Dt_chr7 | Cufflinks | exon | 5513778 | 5514557 | . | . | gene_id | "XLOC_210216"; transcript_id | "Novel_002942"; exon_number | "3"; gene_type | " |
| Dt_chr7 | Cufflinks | exon | 5512994 | 5513513 | . | . | gene_id | "XLOC_210216"; transcript_id | "Novel_002943"; exon_number | "1"; gene_type | " |
| Dt_chr7 | Cufflinks | exon | 5513778 | 5514010 | . | . | gene_id | "XLOC_210216"; transcript_id | "Novel_002943"; exon_number | "2"; gene_type | " |
| Dt_chr7 | Cufflinks | exon | 5514110 | 5514147 | . | . | gene_id | "XLOC_210216"; transcript_id | "Novel_002943"; exon_number | "3"; gene_type | " |
| Dt_chr7 | Cufflinks | exon | 5514233 | 5514519 | . | . | gene_id | "XLOC_210216"; transcript_id | "Novel_002943"; exon_number | "4"; gene_type | " |
| Dt_chr7 | Cufflinks | exon | 5533650 | 5533842 | . | . | gene_id | "XLOC_210217"; transcript_id | "Novel_002944"; exon_number | "1"; gene_type | " |
| Dt_chr7 | Cufflinks | exon | 5534110 | 5534194 | . | . | gene_id | "XLOC_210217"; transcript_id | "Novel_002944"; exon_number | "2"; gene_type | " |
| Dt_chr7 | Cufflinks | exon | 5534509 | 5535125 | . | . | gene_id | "XLOC_210217"; transcript_id | "Novel_002944"; exon_number | "3"; gene_type | " |
| Dt_chr7 | Cufflinks | exon | 5535449 | 5535885 | . | . | gene_id | "XLOC_210217"; transcript_id | "Novel_002944"; exon_number | "4"; gene_type | " |
| Dt_chr7 | Cufflinks | exon | 5537686 | 5537731 | . | . | gene_id | "XLOC_210226"; transcript_id | "Novel_002945"; exon_number | "1"; gene_type | " |
| Dt_chr7 | Cufflinks | exon | 5538029 | 5538196 | . | . | gene_id | "XLOC_210226"; transcript_id | "Novel_002945"; exon_number | "2"; gene_type | " |
| Dt_chr7 | Cufflinks | exon | 5538027 | 5538718 | . | . | gene_id | "XLOC_210226"; transcript_id | "Novel_002946"; exon_number | "1"; gene_type | " |
| Dt_chr7 | Cufflinks | exon | 5539140 | 5539233 | . | . | gene_id | "XLOC_210226"; transcript_id | "Novel_002946"; exon_number | "2"; gene_type | " |
| Dt_chr7 | Cufflinks | exon | 5542001 | 5542531 | . | . | gene_id | "XLOC_210229"; transcript_id | "Novel_002947"; exon_number | "1"; gene_type | " |
| Dt_chr7 | Cufflinks | exon | 5543194 | 5543502 | . | . | gene_id | "XLOC_210229"; transcript_id | "Novel_002947"; exon_number | "2"; gene_type | " |
| Dt_chr7 | Cufflinks | exon | 5626486 | 5627326 | . | . | gene_id | "XLOC_210245"; transcript_id | "Novel_002948"; exon_number | "1"; gene_type | " |
| Dt_chr7 | Cufflinks | exon | 5627398 | 5627445 | . | . | gene_id | "XLOC_210245"; transcript_id | "Novel_002948"; exon_number | "2"; gene_type | " |
| Dt_chr7 | Cufflinks | exon | 5627568 | 5628347 | . | . | gene_id | "XLOC_210245"; transcript_id | "Novel_002948"; exon_number | "3"; gene_type | " |
| Dt_chr7 | Cufflinks | exon | 5658783 | 5660918 | . | . | gene_id | "XLOC_210251"; transcript_id | "Novel_002949"; exon_number | "1"; gene_type | " |
| Dt_chr7 | Cufflinks | exon | 5867716 | 5868507 | . | . | gene_id | "XLOC_210301"; transcript_id | "Novel_002950"; exon_number | "1"; gene_type | " |
| Dt_chr7 | Cufflinks | exon | 5868597 | 5869621 | . | . | gene_id | "XLOC_210301"; transcript_id | "Novel_002950"; exon_number | "2"; gene_type | " |
| Dt_chr7 | Cufflinks | exon | 5870001 | 5870391 | . | . | gene_id | "XLOC_210301"; transcript_id | "Novel_002950"; exon_number | "3"; gene_type | " |

|         |           |      |         |         |   |   |         |                |               |                 |             |      |           |   |
|---------|-----------|------|---------|---------|---|---|---------|----------------|---------------|-----------------|-------------|------|-----------|---|
| Dt_chr7 | Cufflinks | exon | 5870975 | 5871087 | . | . | gene_id | "XLOC_210301"; | transcript_id | "Novel_002950"; | exon_number | "4"; | gene_type | " |
| Dt_chr7 | Cufflinks | exon | 5868381 | 5868507 | . | . | gene_id | "XLOC_210301"; | transcript_id | "Novel_002951"; | exon_number | "1"; | gene_type | " |
| Dt_chr7 | Cufflinks | exon | 5868597 | 5868949 | . | . | gene_id | "XLOC_210301"; | transcript_id | "Novel_002951"; | exon_number | "2"; | gene_type | " |
| Dt_chr7 | Cufflinks | exon | 5869355 | 5869377 | . | . | gene_id | "XLOC_210301"; | transcript_id | "Novel_002951"; | exon_number | "3"; | gene_type | " |
| Dt_chr7 | Cufflinks | exon | 5869325 | 5870391 | . | . | gene_id | "XLOC_210301"; | transcript_id | "Novel_002952"; | exon_number | "1"; | gene_type | " |
| Dt_chr7 | Cufflinks | exon | 5870975 | 5871071 | . | . | gene_id | "XLOC_210301"; | transcript_id | "Novel_002952"; | exon_number | "2"; | gene_type | " |
| Dt_chr7 | Cufflinks | exon | 5998878 | 5999565 | . | . | gene_id | "XLOC_210326"; | transcript_id | "Novel_002953"; | exon_number | "1"; | gene_type | " |
| Dt_chr7 | Cufflinks | exon | 7356429 | 7356474 | . | . | gene_id | "XLOC_210550"; | transcript_id | "Novel_002954"; | exon_number | "1"; | gene_type | " |
| Dt_chr7 | Cufflinks | exon | 7357226 | 7357289 | . | . | gene_id | "XLOC_210550"; | transcript_id | "Novel_002954"; | exon_number | "2"; | gene_type | " |
| Dt_chr7 | Cufflinks | exon | 7357382 | 7357428 | . | . | gene_id | "XLOC_210550"; | transcript_id | "Novel_002954"; | exon_number | "3"; | gene_type | " |
| Dt_chr7 | Cufflinks | exon | 7358313 | 7358463 | . | . | gene_id | "XLOC_210550"; | transcript_id | "Novel_002954"; | exon_number | "4"; | gene_type | " |
| Dt_chr7 | Cufflinks | exon | 7357177 | 7357289 | . | . | gene_id | "XLOC_210550"; | transcript_id | "Novel_002955"; | exon_number | "1"; | gene_type | " |
| Dt_chr7 | Cufflinks | exon | 7357382 | 7357428 | . | . | gene_id | "XLOC_210550"; | transcript_id | "Novel_002955"; | exon_number | "2"; | gene_type | " |
| Dt_chr7 | Cufflinks | exon | 7358313 | 7358460 | . | . | gene_id | "XLOC_210550"; | transcript_id | "Novel_002955"; | exon_number | "3"; | gene_type | " |
| Dt_chr7 | Cufflinks | exon | 7390992 | 7391850 | . | . | gene_id | "XLOC_210555"; | transcript_id | "Novel_002956"; | exon_number | "1"; | gene_type | " |
| Dt_chr7 | Cufflinks | exon | 7391922 | 7392530 | . | . | gene_id | "XLOC_210555"; | transcript_id | "Novel_002956"; | exon_number | "2"; | gene_type | " |
| Dt_chr7 | Cufflinks | exon | 8853333 | 8853925 | . | . | gene_id | "XLOC_210808"; | transcript_id | "Novel_002957"; | exon_number | "1"; | gene_type | " |
| Dt_chr7 | Cufflinks | exon | 8854025 | 8854592 | . | . | gene_id | "XLOC_210808"; | transcript_id | "Novel_002957"; | exon_number | "2"; | gene_type | " |
| Dt_chr7 | Cufflinks | exon | 8853333 | 8853925 | . | . | gene_id | "XLOC_210808"; | transcript_id | "Novel_002958"; | exon_number | "1"; | gene_type | " |
| Dt_chr7 | Cufflinks | exon | 8854025 | 8854499 | . | . | gene_id | "XLOC_210808"; | transcript_id | "Novel_002958"; | exon_number | "2"; | gene_type | " |
| Dt_chr7 | Cufflinks | exon | 8854643 | 8854687 | . | . | gene_id | "XLOC_210808"; | transcript_id | "Novel_002958"; | exon_number | "3"; | gene_type | " |
| Dt_chr7 | Cufflinks | exon | 8854008 | 8854496 | . | . | gene_id | "XLOC_210808"; | transcript_id | "Novel_002959"; | exon_number | "1"; | gene_type | " |
| Dt_chr7 | Cufflinks | exon | 8854643 | 8854670 | . | . | gene_id | "XLOC_210808"; | transcript_id | "Novel_002959"; | exon_number | "2"; | gene_type | " |
| Dt_chr7 | Cufflinks | exon | 9125956 | 9126332 | . | . | gene_id | "XLOC_210851"; | transcript_id | "Novel_002960"; | exon_number | "1"; | gene_type | " |
| Dt_chr7 | Cufflinks | exon | 9126472 | 9128405 | . | . | gene_id | "XLOC_210851"; | transcript_id | "Novel_002960"; | exon_number | "2"; | gene_type | " |
| Dt_chr7 | Cufflinks | exon | 9128888 | 9129356 | . | . | gene_id | "XLOC_210851"; | transcript_id | "Novel_002960"; | exon_number | "3"; | gene_type | " |
| Dt_chr7 | Cufflinks | exon | 9125956 | 9126332 | . | . | gene_id | "XLOC_210851"; | transcript_id | "Novel_002961"; | exon_number | "1"; | gene_type | " |
| Dt_chr7 | Cufflinks | exon | 9126472 | 9129356 | . | . | gene_id | "XLOC_210851"; | transcript_id | "Novel_002961"; | exon_number | "2"; | gene_type | " |
| Dt_chr7 | Cufflinks | exon | 9180139 | 9181041 | . | . | gene_id | "XLOC_210860"; | transcript_id | "Novel_002962"; | exon_number | "1"; | gene_type | " |
| Dt_chr7 | Cufflinks | exon | 9181134 | 9181318 | . | . | gene_id | "XLOC_210860"; | transcript_id | "Novel_002962"; | exon_number | "2"; | gene_type | " |
| Dt_chr7 | Cufflinks | exon | 9181449 | 9181665 | . | . | gene_id | "XLOC_210860"; | transcript_id | "Novel_002962"; | exon_number | "3"; | gene_type | " |
| Dt_chr7 | Cufflinks | exon | 9182229 | 9184199 | . | . | gene_id | "XLOC_210860"; | transcript_id | "Novel_002962"; | exon_number | "4"; | gene_type | " |
| Dt_chr7 | Cufflinks | exon | 9275241 | 9275936 | . | . | gene_id | "XLOC_210865"; | transcript_id | "Novel_002963"; | exon_number | "1"; | gene_type | " |
| Dt_chr7 | Cufflinks | exon | 9276176 | 9276313 | . | . | gene_id | "XLOC_210865"; | transcript_id | "Novel_002963"; | exon_number | "2"; | gene_type | " |
| Dt_chr7 | Cufflinks | exon | 9276441 | 9276627 | . | . | gene_id | "XLOC_210865"; | transcript_id | "Novel_002963"; | exon_number | "3"; | gene_type | " |



Dt\_chr7 Cufflinks exon 11820175 11820303 . - . gene\_id "XLOC\_211216"; transcript\_id "Novel\_002975"; exon\_number "2"; gene\_type "  
Dt\_chr7 Cufflinks exon 11820538 11821004 . - . gene\_id "XLOC\_211216"; transcript\_id "Novel\_002975"; exon\_number "3"; gene\_type "  
Dt\_chr7 Cufflinks exon 11821281 11821999 . - . gene\_id "XLOC\_211216"; transcript\_id "Novel\_002975"; exon\_number "4"; gene\_type "  
Dt\_chr7 Cufflinks exon 12431642 12432796 . - . gene\_id "XLOC\_211305"; transcript\_id "Novel\_002976"; exon\_number "1"; gene\_type "  
Dt\_chr7 Cufflinks exon 12433688 12433814 . - . gene\_id "XLOC\_211305"; transcript\_id "Novel\_002976"; exon\_number "2"; gene\_type "  
Dt\_chr7 Cufflinks exon 15082085 15083579 . - . gene\_id "XLOC\_211617"; transcript\_id "Novel\_002977"; exon\_number "1"; gene\_type "  
Dt\_chr7 Cufflinks exon 15084240 15084293 . - . gene\_id "XLOC\_211617"; transcript\_id "Novel\_002977"; exon\_number "2"; gene\_type "  
Dt\_chr7 Cufflinks exon 15084377 15085507 . - . gene\_id "XLOC\_211617"; transcript\_id "Novel\_002977"; exon\_number "3"; gene\_type "  
Dt\_chr7 Cufflinks exon 15082542 15083579 . - . gene\_id "XLOC\_211617"; transcript\_id "Novel\_002978"; exon\_number "1"; gene\_type "  
Dt\_chr7 Cufflinks exon 15084240 15084293 . - . gene\_id "XLOC\_211617"; transcript\_id "Novel\_002978"; exon\_number "2"; gene\_type "  
Dt\_chr7 Cufflinks exon 15084377 15084421 . - . gene\_id "XLOC\_211617"; transcript\_id "Novel\_002978"; exon\_number "3"; gene\_type "  
Dt\_chr7 Cufflinks exon 15085663 15086047 . - . gene\_id "XLOC\_211617"; transcript\_id "Novel\_002978"; exon\_number "4"; gene\_type "  
Dt\_chr7 Cufflinks exon 16499077 16499468 . - . gene\_id "XLOC\_211759"; transcript\_id "Novel\_002979"; exon\_number "1"; gene\_type "  
Dt\_chr7 Cufflinks exon 16499731 16499835 . - . gene\_id "XLOC\_211759"; transcript\_id "Novel\_002979"; exon\_number "2"; gene\_type "  
Dt\_chr7 Cufflinks exon 16499912 16499971 . - . gene\_id "XLOC\_211759"; transcript\_id "Novel\_002979"; exon\_number "3"; gene\_type "  
Dt\_chr7 Cufflinks exon 16500066 16500177 . - . gene\_id "XLOC\_211759"; transcript\_id "Novel\_002979"; exon\_number "4"; gene\_type "  
Dt\_chr7 Cufflinks exon 16502934 16503290 . - . gene\_id "XLOC\_211759"; transcript\_id "Novel\_002979"; exon\_number "5"; gene\_type "  
Dt\_chr7 Cufflinks exon 16503531 16503568 . - . gene\_id "XLOC\_211759"; transcript\_id "Novel\_002979"; exon\_number "6"; gene\_type "  
Dt\_chr7 Cufflinks exon 16504544 16504580 . - . gene\_id "XLOC\_211759"; transcript\_id "Novel\_002979"; exon\_number "7"; gene\_type "  
Dt\_chr7 Cufflinks exon 16499140 16499468 . - . gene\_id "XLOC\_211759"; transcript\_id "Novel\_002980"; exon\_number "1"; gene\_type "  
Dt\_chr7 Cufflinks exon 16499731 16499835 . - . gene\_id "XLOC\_211759"; transcript\_id "Novel\_002980"; exon\_number "2"; gene\_type "  
Dt\_chr7 Cufflinks exon 16499912 16499971 . - . gene\_id "XLOC\_211759"; transcript\_id "Novel\_002980"; exon\_number "3"; gene\_type "  
Dt\_chr7 Cufflinks exon 16500066 16500177 . - . gene\_id "XLOC\_211759"; transcript\_id "Novel\_002980"; exon\_number "4"; gene\_type "  
Dt\_chr7 Cufflinks exon 16502934 16503290 . - . gene\_id "XLOC\_211759"; transcript\_id "Novel\_002980"; exon\_number "5"; gene\_type "  
Dt\_chr7 Cufflinks exon 16504544 16504582 . - . gene\_id "XLOC\_211759"; transcript\_id "Novel\_002980"; exon\_number "6"; gene\_type "  
Dt\_chr7 Cufflinks exon 16499176 16499468 . - . gene\_id "XLOC\_211759"; transcript\_id "Novel\_002981"; exon\_number "1"; gene\_type "  
Dt\_chr7 Cufflinks exon 16499731 16499835 . - . gene\_id "XLOC\_211759"; transcript\_id "Novel\_002981"; exon\_number "2"; gene\_type "  
Dt\_chr7 Cufflinks exon 16499912 16499971 . - . gene\_id "XLOC\_211759"; transcript\_id "Novel\_002981"; exon\_number "3"; gene\_type "  
Dt\_chr7 Cufflinks exon 16500066 16500177 . - . gene\_id "XLOC\_211759"; transcript\_id "Novel\_002981"; exon\_number "4"; gene\_type "  
Dt\_chr7 Cufflinks exon 16502934 16503398 . - . gene\_id "XLOC\_211759"; transcript\_id "Novel\_002981"; exon\_number "5"; gene\_type "  
Dt\_chr7 Cufflinks exon 22507308 22508490 . - . gene\_id "XLOC\_212344"; transcript\_id "Novel\_002982"; exon\_number "1"; gene\_type "  
Dt\_chr7 Cufflinks exon 22508725 22508787 . - . gene\_id "XLOC\_212344"; transcript\_id "Novel\_002982"; exon\_number "2"; gene\_type "  
Dt\_chr7 Cufflinks exon 22510064 22510351 . - . gene\_id "XLOC\_212344"; transcript\_id "Novel\_002982"; exon\_number "3"; gene\_type "  
Dt\_chr7 Cufflinks exon 23473155 23473480 . - . gene\_id "XLOC\_212457"; transcript\_id "Novel\_002983"; exon\_number "1"; gene\_type "  
Dt\_chr7 Cufflinks exon 23474422 23474906 . - . gene\_id "XLOC\_212457"; transcript\_id "Novel\_002983"; exon\_number "2"; gene\_type "

|         |           |      |          |          |   |   |         |                              |                             |                 |   |
|---------|-----------|------|----------|----------|---|---|---------|------------------------------|-----------------------------|-----------------|---|
| Dt_chr7 | Cufflinks | exon | 23504576 | 23504819 | . | . | gene_id | "XLOC_212465"; transcript_id | "Novel_002984"; exon_number | "1"; gene_type  | " |
| Dt_chr7 | Cufflinks | exon | 23524132 | 23525531 | . | . | gene_id | "XLOC_212469"; transcript_id | "Novel_002985"; exon_number | "1"; gene_type  | " |
| Dt_chr7 | Cufflinks | exon | 23525677 | 23526367 | . | . | gene_id | "XLOC_212469"; transcript_id | "Novel_002985"; exon_number | "2"; gene_type  | " |
| Dt_chr7 | Cufflinks | exon | 23655919 | 23656554 | . | . | gene_id | "XLOC_212502"; transcript_id | "Novel_002986"; exon_number | "1"; gene_type  | " |
| Dt_chr7 | Cufflinks | exon | 23656955 | 23657098 | . | . | gene_id | "XLOC_212502"; transcript_id | "Novel_002986"; exon_number | "2"; gene_type  | " |
| Dt_chr7 | Cufflinks | exon | 23657374 | 23657457 | . | . | gene_id | "XLOC_212502"; transcript_id | "Novel_002986"; exon_number | "3"; gene_type  | " |
| Dt_chr7 | Cufflinks | exon | 23657805 | 23658133 | . | . | gene_id | "XLOC_212502"; transcript_id | "Novel_002986"; exon_number | "4"; gene_type  | " |
| Dt_chr7 | Cufflinks | exon | 23658222 | 23658304 | . | . | gene_id | "XLOC_212502"; transcript_id | "Novel_002986"; exon_number | "5"; gene_type  | " |
| Dt_chr7 | Cufflinks | exon | 23658735 | 23658883 | . | . | gene_id | "XLOC_212502"; transcript_id | "Novel_002986"; exon_number | "6"; gene_type  | " |
| Dt_chr7 | Cufflinks | exon | 23658958 | 23659064 | . | . | gene_id | "XLOC_212502"; transcript_id | "Novel_002986"; exon_number | "7"; gene_type  | " |
| Dt_chr7 | Cufflinks | exon | 23659208 | 23659297 | . | . | gene_id | "XLOC_212502"; transcript_id | "Novel_002986"; exon_number | "8"; gene_type  | " |
| Dt_chr7 | Cufflinks | exon | 23659377 | 23659505 | . | . | gene_id | "XLOC_212502"; transcript_id | "Novel_002986"; exon_number | "9"; gene_type  | " |
| Dt_chr7 | Cufflinks | exon | 23659700 | 23659867 | . | . | gene_id | "XLOC_212502"; transcript_id | "Novel_002986"; exon_number | "10"; gene_type | " |
| Dt_chr7 | Cufflinks | exon | 23659976 | 23660073 | . | . | gene_id | "XLOC_212502"; transcript_id | "Novel_002986"; exon_number | "11"; gene_type | " |
| Dt_chr7 | Cufflinks | exon | 23655921 | 23656554 | . | . | gene_id | "XLOC_212502"; transcript_id | "Novel_002987"; exon_number | "1"; gene_type  | " |
| Dt_chr7 | Cufflinks | exon | 23656955 | 23657098 | . | . | gene_id | "XLOC_212502"; transcript_id | "Novel_002987"; exon_number | "2"; gene_type  | " |
| Dt_chr7 | Cufflinks | exon | 23657374 | 23657457 | . | . | gene_id | "XLOC_212502"; transcript_id | "Novel_002987"; exon_number | "3"; gene_type  | " |
| Dt_chr7 | Cufflinks | exon | 23657805 | 23658344 | . | . | gene_id | "XLOC_212502"; transcript_id | "Novel_002987"; exon_number | "4"; gene_type  | " |
| Dt_chr7 | Cufflinks | exon | 23660205 | 23660898 | . | . | gene_id | "XLOC_212502"; transcript_id | "Novel_002988"; exon_number | "1"; gene_type  | " |
| Dt_chr7 | Cufflinks | exon | 23662562 | 23662962 | . | . | gene_id | "XLOC_212502"; transcript_id | "Novel_002988"; exon_number | "2"; gene_type  | " |
| Dt_chr7 | Cufflinks | exon | 23663101 | 23663175 | . | . | gene_id | "XLOC_212503"; transcript_id | "Novel_002989"; exon_number | "1"; gene_type  | " |
| Dt_chr7 | Cufflinks | exon | 23663270 | 23663446 | . | . | gene_id | "XLOC_212503"; transcript_id | "Novel_002989"; exon_number | "2"; gene_type  | " |
| Dt_chr7 | Cufflinks | exon | 23663159 | 23663729 | . | . | gene_id | "XLOC_212503"; transcript_id | "Novel_002990"; exon_number | "1"; gene_type  | " |
| Dt_chr7 | Cufflinks | exon | 23663825 | 23664871 | . | . | gene_id | "XLOC_212503"; transcript_id | "Novel_002990"; exon_number | "2"; gene_type  | " |
| Dt_chr7 | Cufflinks | exon | 27670106 | 27671132 | . | . | gene_id | "XLOC_212821"; transcript_id | "Novel_002991"; exon_number | "1"; gene_type  | " |
| Dt_chr7 | Cufflinks | exon | 27673680 | 27673963 | . | . | gene_id | "XLOC_212821"; transcript_id | "Novel_002991"; exon_number | "2"; gene_type  | " |
| Dt_chr7 | Cufflinks | exon | 28716647 | 28716881 | . | . | gene_id | "XLOC_212878"; transcript_id | "Novel_002992"; exon_number | "1"; gene_type  | " |
| Dt_chr7 | Cufflinks | exon | 28716970 | 28717031 | . | . | gene_id | "XLOC_212878"; transcript_id | "Novel_002992"; exon_number | "2"; gene_type  | " |
| Dt_chr7 | Cufflinks | exon | 28721741 | 28721789 | . | . | gene_id | "XLOC_212878"; transcript_id | "Novel_002992"; exon_number | "3"; gene_type  | " |
| Dt_chr7 | Cufflinks | exon | 28717740 | 28721518 | . | . | gene_id | "XLOC_212878"; transcript_id | "Novel_002993"; exon_number | "1"; gene_type  | " |
| Dt_chr7 | Cufflinks | exon | 28721741 | 28721835 | . | . | gene_id | "XLOC_212878"; transcript_id | "Novel_002993"; exon_number | "2"; gene_type  | " |
| Dt_chr7 | Cufflinks | exon | 29781117 | 29781193 | . | . | gene_id | "XLOC_212964"; transcript_id | "Novel_002994"; exon_number | "1"; gene_type  | " |
| Dt_chr7 | Cufflinks | exon | 29781282 | 29781760 | . | . | gene_id | "XLOC_212964"; transcript_id | "Novel_002994"; exon_number | "2"; gene_type  | " |
| Dt_chr7 | Cufflinks | exon | 29880076 | 29880571 | . | . | gene_id | "XLOC_212971"; transcript_id | "Novel_002995"; exon_number | "1"; gene_type  | " |
| Dt_chr7 | Cufflinks | exon | 29881781 | 29882078 | . | . | gene_id | "XLOC_212971"; transcript_id | "Novel_002995"; exon_number | "2"; gene_type  | " |

|         |           |      |          |          |   |   |   |         |                |               |                 |             |      |           |   |
|---------|-----------|------|----------|----------|---|---|---|---------|----------------|---------------|-----------------|-------------|------|-----------|---|
| Dt_chr7 | Cufflinks | exon | 29882167 | 29882241 | . | - | . | gene_id | "XLOC_212971"; | transcript_id | "Novel_002995"; | exon_number | "3"; | gene_type | " |
| Dt_chr7 | Cufflinks | exon | 29881015 | 29882078 | . | - | . | gene_id | "XLOC_212971"; | transcript_id | "Novel_002996"; | exon_number | "1"; | gene_type | " |
| Dt_chr7 | Cufflinks | exon | 29882167 | 29882241 | . | - | . | gene_id | "XLOC_212971"; | transcript_id | "Novel_002996"; | exon_number | "2"; | gene_type | " |
| Dt_chr7 | Cufflinks | exon | 31781297 | 31781502 | . | - | . | gene_id | "XLOC_213081"; | transcript_id | "Novel_002997"; | exon_number | "1"; | gene_type | " |
| Dt_chr7 | Cufflinks | exon | 34436921 | 34437419 | . | - | . | gene_id | "XLOC_213233"; | transcript_id | "Novel_002998"; | exon_number | "1"; | gene_type | " |
| Dt_chr7 | Cufflinks | exon | 34437600 | 34437698 | . | - | . | gene_id | "XLOC_213233"; | transcript_id | "Novel_002998"; | exon_number | "2"; | gene_type | " |
| Dt_chr7 | Cufflinks | exon | 34437801 | 34437854 | . | - | . | gene_id | "XLOC_213233"; | transcript_id | "Novel_002998"; | exon_number | "3"; | gene_type | " |
| Dt_chr7 | Cufflinks | exon | 34438102 | 34438165 | . | - | . | gene_id | "XLOC_213233"; | transcript_id | "Novel_002998"; | exon_number | "4"; | gene_type | " |
| Dt_chr7 | Cufflinks | exon | 34438416 | 34438453 | . | - | . | gene_id | "XLOC_213233"; | transcript_id | "Novel_002998"; | exon_number | "5"; | gene_type | " |
| Dt_chr7 | Cufflinks | exon | 34438548 | 34438606 | . | - | . | gene_id | "XLOC_213233"; | transcript_id | "Novel_002998"; | exon_number | "6"; | gene_type | " |
| Dt_chr7 | Cufflinks | exon | 34438696 | 34438735 | . | - | . | gene_id | "XLOC_213233"; | transcript_id | "Novel_002998"; | exon_number | "7"; | gene_type | " |
| Dt_chr7 | Cufflinks | exon | 34438903 | 34438978 | . | - | . | gene_id | "XLOC_213233"; | transcript_id | "Novel_002998"; | exon_number | "8"; | gene_type | " |
| Dt_chr7 | Cufflinks | exon | 34439063 | 34439314 | . | - | . | gene_id | "XLOC_213233"; | transcript_id | "Novel_002998"; | exon_number | "9"; | gene_type | " |
| Dt_chr7 | Cufflinks | exon | 36751971 | 36752172 | . | - | . | gene_id | "XLOC_213417"; | transcript_id | "Novel_002999"; | exon_number | "1"; | gene_type | " |
| Dt_chr7 | Cufflinks | exon | 36840906 | 36842328 | . | - | . | gene_id | "XLOC_213436"; | transcript_id | "Novel_003000"; | exon_number | "1"; | gene_type | " |
| Dt_chr7 | Cufflinks | exon | 36842694 | 36842762 | . | - | . | gene_id | "XLOC_213436"; | transcript_id | "Novel_003000"; | exon_number | "2"; | gene_type | " |
| Dt_chr7 | Cufflinks | exon | 36842984 | 36843193 | . | - | . | gene_id | "XLOC_213436"; | transcript_id | "Novel_003000"; | exon_number | "3"; | gene_type | " |
| Dt_chr7 | Cufflinks | exon | 36840912 | 36842328 | . | - | . | gene_id | "XLOC_213436"; | transcript_id | "Novel_003001"; | exon_number | "1"; | gene_type | " |
| Dt_chr7 | Cufflinks | exon | 36842694 | 36842845 | . | - | . | gene_id | "XLOC_213436"; | transcript_id | "Novel_003001"; | exon_number | "2"; | gene_type | " |
| Dt_chr7 | Cufflinks | exon | 36951290 | 36951914 | . | - | . | gene_id | "XLOC_213451"; | transcript_id | "Novel_003002"; | exon_number | "1"; | gene_type | " |
| Dt_chr7 | Cufflinks | exon | 36952125 | 36952221 | . | - | . | gene_id | "XLOC_213451"; | transcript_id | "Novel_003002"; | exon_number | "2"; | gene_type | " |
| Dt_chr7 | Cufflinks | exon | 36952640 | 36952784 | . | - | . | gene_id | "XLOC_213451"; | transcript_id | "Novel_003002"; | exon_number | "3"; | gene_type | " |
| Dt_chr7 | Cufflinks | exon | 38525351 | 38526217 | . | - | . | gene_id | "XLOC_213569"; | transcript_id | "Novel_003003"; | exon_number | "1"; | gene_type | " |
| Dt_chr7 | Cufflinks | exon | 38526448 | 38529472 | . | - | . | gene_id | "XLOC_213569"; | transcript_id | "Novel_003003"; | exon_number | "2"; | gene_type | " |
| Dt_chr7 | Cufflinks | exon | 40811127 | 40811341 | . | - | . | gene_id | "XLOC_213698"; | transcript_id | "Novel_003004"; | exon_number | "1"; | gene_type | " |
| Dt_chr7 | Cufflinks | exon | 41086168 | 41086408 | . | - | . | gene_id | "XLOC_213721"; | transcript_id | "Novel_003005"; | exon_number | "1"; | gene_type | " |
| Dt_chr7 | Cufflinks | exon | 43429353 | 43430455 | . | - | . | gene_id | "XLOC_213865"; | transcript_id | "Novel_003006"; | exon_number | "1"; | gene_type | " |
| Dt_chr7 | Cufflinks | exon | 43430550 | 43430598 | . | - | . | gene_id | "XLOC_213865"; | transcript_id | "Novel_003006"; | exon_number | "2"; | gene_type | " |
| Dt_chr7 | Cufflinks | exon | 43430672 | 43431050 | . | - | . | gene_id | "XLOC_213865"; | transcript_id | "Novel_003006"; | exon_number | "3"; | gene_type | " |
| Dt_chr7 | Cufflinks | exon | 43430405 | 43430455 | . | - | . | gene_id | "XLOC_213865"; | transcript_id | "Novel_003007"; | exon_number | "1"; | gene_type | " |
| Dt_chr7 | Cufflinks | exon | 43430550 | 43431048 | . | - | . | gene_id | "XLOC_213865"; | transcript_id | "Novel_003007"; | exon_number | "2"; | gene_type | " |
| Dt_chr7 | Cufflinks | exon | 44897219 | 44897716 | . | - | . | gene_id | "XLOC_213937"; | transcript_id | "Novel_003008"; | exon_number | "1"; | gene_type | " |
| Dt_chr7 | Cufflinks | exon | 44897862 | 44897915 | . | - | . | gene_id | "XLOC_213937"; | transcript_id | "Novel_003008"; | exon_number | "2"; | gene_type | " |
| Dt_chr7 | Cufflinks | exon | 44898390 | 44898480 | . | - | . | gene_id | "XLOC_213937"; | transcript_id | "Novel_003008"; | exon_number | "3"; | gene_type | " |
| Dt_chr7 | Cufflinks | exon | 44898747 | 44899025 | . | - | . | gene_id | "XLOC_213937"; | transcript_id | "Novel_003008"; | exon_number | "4"; | gene_type | " |



|         |           |      |          |          |   |   |   |         |                |               |                 |             |      |           |   |
|---------|-----------|------|----------|----------|---|---|---|---------|----------------|---------------|-----------------|-------------|------|-----------|---|
| Dt_chr7 | Cufflinks | exon | 44897231 | 44897915 | . | - | . | gene_id | "XLOC_213937"; | transcript_id | "Novel_003009"; | exon_number | "1"; | gene_type | " |
| Dt_chr7 | Cufflinks | exon | 44898390 | 44898480 | . | - | . | gene_id | "XLOC_213937"; | transcript_id | "Novel_003009"; | exon_number | "2"; | gene_type | " |
| Dt_chr7 | Cufflinks | exon | 44898747 | 44899044 | . | - | . | gene_id | "XLOC_213937"; | transcript_id | "Novel_003009"; | exon_number | "3"; | gene_type | " |
| Dt_chr8 | Cufflinks | exon | 1545392  | 1547745  | . | + | . | gene_id | "XLOC_214284"; | transcript_id | "Novel_003010"; | exon_number | "1"; | gene_type | " |
| Dt_chr8 | Cufflinks | exon | 1547835  | 1547923  | . | + | . | gene_id | "XLOC_214284"; | transcript_id | "Novel_003010"; | exon_number | "2"; | gene_type | " |
| Dt_chr8 | Cufflinks | exon | 1548253  | 1548514  | . | + | . | gene_id | "XLOC_214284"; | transcript_id | "Novel_003010"; | exon_number | "3"; | gene_type | " |
| Dt_chr8 | Cufflinks | exon | 1548697  | 1548953  | . | + | . | gene_id | "XLOC_214284"; | transcript_id | "Novel_003010"; | exon_number | "4"; | gene_type | " |
| Dt_chr8 | Cufflinks | exon | 1549287  | 1550080  | . | + | . | gene_id | "XLOC_214284"; | transcript_id | "Novel_003010"; | exon_number | "5"; | gene_type | " |
| Dt_chr8 | Cufflinks | exon | 1547567  | 1547745  | . | + | . | gene_id | "XLOC_214284"; | transcript_id | "Novel_003011"; | exon_number | "1"; | gene_type | " |
| Dt_chr8 | Cufflinks | exon | 1547835  | 1548514  | . | + | . | gene_id | "XLOC_214284"; | transcript_id | "Novel_003011"; | exon_number | "2"; | gene_type | " |
| Dt_chr8 | Cufflinks | exon | 1548702  | 1548953  | . | + | . | gene_id | "XLOC_214284"; | transcript_id | "Novel_003011"; | exon_number | "3"; | gene_type | " |
| Dt_chr8 | Cufflinks | exon | 1549287  | 1550158  | . | + | . | gene_id | "XLOC_214284"; | transcript_id | "Novel_003011"; | exon_number | "4"; | gene_type | " |
| Dt_chr8 | Cufflinks | exon | 2621909  | 2623396  | . | + | . | gene_id | "XLOC_214412"; | transcript_id | "Novel_003012"; | exon_number | "1"; | gene_type | " |
| Dt_chr8 | Cufflinks | exon | 13567141 | 13567410 | . | + | . | gene_id | "XLOC_215153"; | transcript_id | "Novel_003013"; | exon_number | "1"; | gene_type | " |
| Dt_chr8 | Cufflinks | exon | 13568214 | 13570425 | . | + | . | gene_id | "XLOC_215153"; | transcript_id | "Novel_003013"; | exon_number | "2"; | gene_type | " |
| Dt_chr8 | Cufflinks | exon | 17494886 | 17495021 | . | + | . | gene_id | "XLOC_215346"; | transcript_id | "Novel_003014"; | exon_number | "1"; | gene_type | " |
| Dt_chr8 | Cufflinks | exon | 17495121 | 17498617 | . | + | . | gene_id | "XLOC_215346"; | transcript_id | "Novel_003014"; | exon_number | "2"; | gene_type | " |
| Dt_chr8 | Cufflinks | exon | 19202278 | 19202464 | . | + | . | gene_id | "XLOC_215429"; | transcript_id | "Novel_003015"; | exon_number | "1"; | gene_type | " |
| Dt_chr8 | Cufflinks | exon | 19202563 | 19202627 | . | + | . | gene_id | "XLOC_215429"; | transcript_id | "Novel_003015"; | exon_number | "2"; | gene_type | " |
| Dt_chr8 | Cufflinks | exon | 20706641 | 20706799 | . | + | . | gene_id | "XLOC_215513"; | transcript_id | "Novel_003016"; | exon_number | "1"; | gene_type | " |
| Dt_chr8 | Cufflinks | exon | 20706896 | 20706952 | . | + | . | gene_id | "XLOC_215513"; | transcript_id | "Novel_003016"; | exon_number | "2"; | gene_type | " |
| Dt_chr8 | Cufflinks | exon | 20707994 | 20710484 | . | + | . | gene_id | "XLOC_215513"; | transcript_id | "Novel_003016"; | exon_number | "3"; | gene_type | " |
| Dt_chr8 | Cufflinks | exon | 21833082 | 21834099 | . | + | . | gene_id | "XLOC_215607"; | transcript_id | "Novel_003017"; | exon_number | "1"; | gene_type | " |
| Dt_chr8 | Cufflinks | exon | 21834399 | 21837328 | . | + | . | gene_id | "XLOC_215607"; | transcript_id | "Novel_003017"; | exon_number | "2"; | gene_type | " |
| Dt_chr8 | Cufflinks | exon | 22736084 | 22736250 | . | + | . | gene_id | "XLOC_215657"; | transcript_id | "Novel_003018"; | exon_number | "1"; | gene_type | " |
| Dt_chr8 | Cufflinks | exon | 22736334 | 22736800 | . | + | . | gene_id | "XLOC_215657"; | transcript_id | "Novel_003018"; | exon_number | "2"; | gene_type | " |
| Dt_chr8 | Cufflinks | exon | 24140735 | 24141247 | . | + | . | gene_id | "XLOC_215809"; | transcript_id | "Novel_003019"; | exon_number | "1"; | gene_type | " |
| Dt_chr8 | Cufflinks | exon | 24141790 | 24142012 | . | + | . | gene_id | "XLOC_215809"; | transcript_id | "Novel_003019"; | exon_number | "2"; | gene_type | " |
| Dt_chr8 | Cufflinks | exon | 24142128 | 24142207 | . | + | . | gene_id | "XLOC_215809"; | transcript_id | "Novel_003019"; | exon_number | "3"; | gene_type | " |
| Dt_chr8 | Cufflinks | exon | 24143280 | 24143436 | . | + | . | gene_id | "XLOC_215809"; | transcript_id | "Novel_003019"; | exon_number | "4"; | gene_type | " |
| Dt_chr8 | Cufflinks | exon | 24143518 | 24143864 | . | + | . | gene_id | "XLOC_215809"; | transcript_id | "Novel_003019"; | exon_number | "5"; | gene_type | " |
| Dt_chr8 | Cufflinks | exon | 24140868 | 24141046 | . | + | . | gene_id | "XLOC_215809"; | transcript_id | "Novel_003020"; | exon_number | "1"; | gene_type | " |
| Dt_chr8 | Cufflinks | exon | 24141790 | 24142012 | . | + | . | gene_id | "XLOC_215809"; | transcript_id | "Novel_003020"; | exon_number | "2"; | gene_type | " |
| Dt_chr8 | Cufflinks | exon | 24142128 | 24142207 | . | + | . | gene_id | "XLOC_215809"; | transcript_id | "Novel_003020"; | exon_number | "3"; | gene_type | " |
| Dt_chr8 | Cufflinks | exon | 24143280 | 24143436 | . | + | . | gene_id | "XLOC_215809"; | transcript_id | "Novel_003020"; | exon_number | "4"; | gene_type | " |

|         |           |      |          |          |   |   |   |         |                |               |                 |             |      |           |   |
|---------|-----------|------|----------|----------|---|---|---|---------|----------------|---------------|-----------------|-------------|------|-----------|---|
| Dt_chr8 | Cufflinks | exon | 24143518 | 24143803 | . | + | . | gene_id | "XLOC_215809"; | transcript_id | "Novel_003020"; | exon_number | "5"; | gene_type | " |
| Dt_chr8 | Cufflinks | exon | 24142503 | 24143436 | . | + | . | gene_id | "XLOC_215809"; | transcript_id | "Novel_003021"; | exon_number | "1"; | gene_type | " |
| Dt_chr8 | Cufflinks | exon | 24143518 | 24143529 | . | + | . | gene_id | "XLOC_215809"; | transcript_id | "Novel_003021"; | exon_number | "2"; | gene_type | " |
| Dt_chr8 | Cufflinks | exon | 30392677 | 30393097 | . | + | . | gene_id | "XLOC_216152"; | transcript_id | "Novel_003022"; | exon_number | "1"; | gene_type | " |
| Dt_chr8 | Cufflinks | exon | 30393638 | 30393717 | . | + | . | gene_id | "XLOC_216152"; | transcript_id | "Novel_003022"; | exon_number | "2"; | gene_type | " |
| Dt_chr8 | Cufflinks | exon | 30394057 | 30394104 | . | + | . | gene_id | "XLOC_216152"; | transcript_id | "Novel_003022"; | exon_number | "3"; | gene_type | " |
| Dt_chr8 | Cufflinks | exon | 30394176 | 30394406 | . | + | . | gene_id | "XLOC_216152"; | transcript_id | "Novel_003022"; | exon_number | "4"; | gene_type | " |
| Dt_chr8 | Cufflinks | exon | 30393499 | 30393717 | . | + | . | gene_id | "XLOC_216152"; | transcript_id | "Novel_003023"; | exon_number | "1"; | gene_type | " |
| Dt_chr8 | Cufflinks | exon | 30394057 | 30394104 | . | + | . | gene_id | "XLOC_216152"; | transcript_id | "Novel_003023"; | exon_number | "2"; | gene_type | " |
| Dt_chr8 | Cufflinks | exon | 30394176 | 30394396 | . | + | . | gene_id | "XLOC_216152"; | transcript_id | "Novel_003023"; | exon_number | "3"; | gene_type | " |
| Dt_chr8 | Cufflinks | exon | 30401173 | 30401495 | . | + | . | gene_id | "XLOC_216154"; | transcript_id | "Novel_003024"; | exon_number | "1"; | gene_type | " |
| Dt_chr8 | Cufflinks | exon | 30401583 | 30401664 | . | + | . | gene_id | "XLOC_216154"; | transcript_id | "Novel_003024"; | exon_number | "2"; | gene_type | " |
| Dt_chr8 | Cufflinks | exon | 30407601 | 30407708 | . | + | . | gene_id | "XLOC_216154"; | transcript_id | "Novel_003024"; | exon_number | "3"; | gene_type | " |
| Dt_chr8 | Cufflinks | exon | 30407794 | 30407861 | . | + | . | gene_id | "XLOC_216154"; | transcript_id | "Novel_003024"; | exon_number | "4"; | gene_type | " |
| Dt_chr8 | Cufflinks | exon | 30408427 | 30410050 | . | + | . | gene_id | "XLOC_216154"; | transcript_id | "Novel_003024"; | exon_number | "5"; | gene_type | " |
| Dt_chr8 | Cufflinks | exon | 30401173 | 30401495 | . | + | . | gene_id | "XLOC_216154"; | transcript_id | "Novel_003025"; | exon_number | "1"; | gene_type | " |
| Dt_chr8 | Cufflinks | exon | 30401583 | 30401664 | . | + | . | gene_id | "XLOC_216154"; | transcript_id | "Novel_003025"; | exon_number | "2"; | gene_type | " |
| Dt_chr8 | Cufflinks | exon | 30407601 | 30407708 | . | + | . | gene_id | "XLOC_216154"; | transcript_id | "Novel_003025"; | exon_number | "3"; | gene_type | " |
| Dt_chr8 | Cufflinks | exon | 30407794 | 30407899 | . | + | . | gene_id | "XLOC_216154"; | transcript_id | "Novel_003025"; | exon_number | "4"; | gene_type | " |
| Dt_chr8 | Cufflinks | exon | 30408427 | 30410050 | . | + | . | gene_id | "XLOC_216154"; | transcript_id | "Novel_003025"; | exon_number | "5"; | gene_type | " |
| Dt_chr8 | Cufflinks | exon | 34028250 | 34028470 | . | + | . | gene_id | "XLOC_216443"; | transcript_id | "Novel_003026"; | exon_number | "1"; | gene_type | " |
| Dt_chr8 | Cufflinks | exon | 34412803 | 34412992 | . | + | . | gene_id | "XLOC_216481"; | transcript_id | "Novel_003027"; | exon_number | "1"; | gene_type | " |
| Dt_chr8 | Cufflinks | exon | 34414051 | 34414128 | . | + | . | gene_id | "XLOC_216481"; | transcript_id | "Novel_003027"; | exon_number | "2"; | gene_type | " |
| Dt_chr8 | Cufflinks | exon | 34414595 | 34414812 | . | + | . | gene_id | "XLOC_216481"; | transcript_id | "Novel_003027"; | exon_number | "3"; | gene_type | " |
| Dt_chr8 | Cufflinks | exon | 35169200 | 35169371 | . | + | . | gene_id | "XLOC_216549"; | transcript_id | "Novel_003028"; | exon_number | "1"; | gene_type | " |
| Dt_chr8 | Cufflinks | exon | 35169601 | 35169684 | . | + | . | gene_id | "XLOC_216549"; | transcript_id | "Novel_003028"; | exon_number | "2"; | gene_type | " |
| Dt_chr8 | Cufflinks | exon | 35737053 | 35737508 | . | + | . | gene_id | "XLOC_216596"; | transcript_id | "Novel_003029"; | exon_number | "1"; | gene_type | " |
| Dt_chr8 | Cufflinks | exon | 35739384 | 35739497 | . | + | . | gene_id | "XLOC_216596"; | transcript_id | "Novel_003029"; | exon_number | "2"; | gene_type | " |
| Dt_chr8 | Cufflinks | exon | 35740134 | 35740529 | . | + | . | gene_id | "XLOC_216596"; | transcript_id | "Novel_003029"; | exon_number | "3"; | gene_type | " |
| Dt_chr8 | Cufflinks | exon | 35741249 | 35741317 | . | + | . | gene_id | "XLOC_216596"; | transcript_id | "Novel_003029"; | exon_number | "4"; | gene_type | " |
| Dt_chr8 | Cufflinks | exon | 35741422 | 35741493 | . | + | . | gene_id | "XLOC_216596"; | transcript_id | "Novel_003029"; | exon_number | "5"; | gene_type | " |
| Dt_chr8 | Cufflinks | exon | 35741594 | 35741722 | . | + | . | gene_id | "XLOC_216596"; | transcript_id | "Novel_003029"; | exon_number | "6"; | gene_type | " |
| Dt_chr8 | Cufflinks | exon | 35741823 | 35741903 | . | + | . | gene_id | "XLOC_216596"; | transcript_id | "Novel_003029"; | exon_number | "7"; | gene_type | " |
| Dt_chr8 | Cufflinks | exon | 35742131 | 35742326 | . | + | . | gene_id | "XLOC_216596"; | transcript_id | "Novel_003029"; | exon_number | "8"; | gene_type | " |
| Dt_chr8 | Cufflinks | exon | 35742837 | 35743363 | . | + | . | gene_id | "XLOC_216596"; | transcript_id | "Novel_003029"; | exon_number | "9"; | gene_type | " |

|         |           |      |          |          |   |   |   |         |                |               |                 |             |      |           |   |
|---------|-----------|------|----------|----------|---|---|---|---------|----------------|---------------|-----------------|-------------|------|-----------|---|
| Dt_chr8 | Cufflinks | exon | 36054219 | 36054490 | . | + | . | gene_id | "XLOC_216624"; | transcript_id | "Novel_003030"; | exon_number | "1"; | gene_type | " |
| Dt_chr8 | Cufflinks | exon | 36055415 | 36055455 | . | + | . | gene_id | "XLOC_216624"; | transcript_id | "Novel_003030"; | exon_number | "2"; | gene_type | " |
| Dt_chr8 | Cufflinks | exon | 36055562 | 36055649 | . | + | . | gene_id | "XLOC_216624"; | transcript_id | "Novel_003030"; | exon_number | "3"; | gene_type | " |
| Dt_chr8 | Cufflinks | exon | 36055800 | 36055886 | . | + | . | gene_id | "XLOC_216624"; | transcript_id | "Novel_003030"; | exon_number | "4"; | gene_type | " |
| Dt_chr8 | Cufflinks | exon | 36056122 | 36056168 | . | + | . | gene_id | "XLOC_216624"; | transcript_id | "Novel_003030"; | exon_number | "5"; | gene_type | " |
| Dt_chr8 | Cufflinks | exon | 37291873 | 37292952 | . | + | . | gene_id | "XLOC_216728"; | transcript_id | "Novel_003031"; | exon_number | "1"; | gene_type | " |
| Dt_chr8 | Cufflinks | exon | 37293557 | 37294105 | . | + | . | gene_id | "XLOC_216728"; | transcript_id | "Novel_003031"; | exon_number | "2"; | gene_type | " |
| Dt_chr8 | Cufflinks | exon | 38613551 | 38613785 | . | + | . | gene_id | "XLOC_216860"; | transcript_id | "Novel_003032"; | exon_number | "1"; | gene_type | " |
| Dt_chr8 | Cufflinks | exon | 38616273 | 38616550 | . | + | . | gene_id | "XLOC_216860"; | transcript_id | "Novel_003032"; | exon_number | "2"; | gene_type | " |
| Dt_chr8 | Cufflinks | exon | 38632184 | 38632684 | . | + | . | gene_id | "XLOC_216866"; | transcript_id | "Novel_003033"; | exon_number | "1"; | gene_type | " |
| Dt_chr8 | Cufflinks | exon | 38632889 | 38633773 | . | + | . | gene_id | "XLOC_216866"; | transcript_id | "Novel_003033"; | exon_number | "2"; | gene_type | " |
| Dt_chr8 | Cufflinks | exon | 38633867 | 38634157 | . | + | . | gene_id | "XLOC_216866"; | transcript_id | "Novel_003033"; | exon_number | "3"; | gene_type | " |
| Dt_chr8 | Cufflinks | exon | 38632189 | 38632684 | . | + | . | gene_id | "XLOC_216866"; | transcript_id | "Novel_003034"; | exon_number | "1"; | gene_type | " |
| Dt_chr8 | Cufflinks | exon | 38632889 | 38633388 | . | + | . | gene_id | "XLOC_216866"; | transcript_id | "Novel_003034"; | exon_number | "2"; | gene_type | " |
| Dt_chr8 | Cufflinks | exon | 38633489 | 38633626 | . | + | . | gene_id | "XLOC_216866"; | transcript_id | "Novel_003034"; | exon_number | "3"; | gene_type | " |
| Dt_chr8 | Cufflinks | exon | 38633715 | 38633773 | . | + | . | gene_id | "XLOC_216866"; | transcript_id | "Novel_003034"; | exon_number | "4"; | gene_type | " |
| Dt_chr8 | Cufflinks | exon | 38633867 | 38634225 | . | + | . | gene_id | "XLOC_216866"; | transcript_id | "Novel_003034"; | exon_number | "5"; | gene_type | " |
| Dt_chr8 | Cufflinks | exon | 39152731 | 39153005 | . | + | . | gene_id | "XLOC_216920"; | transcript_id | "Novel_003035"; | exon_number | "1"; | gene_type | " |
| Dt_chr8 | Cufflinks | exon | 39153080 | 39153180 | . | + | . | gene_id | "XLOC_216920"; | transcript_id | "Novel_003035"; | exon_number | "2"; | gene_type | " |
| Dt_chr8 | Cufflinks | exon | 40770584 | 40770809 | . | + | . | gene_id | "XLOC_217126"; | transcript_id | "Novel_003036"; | exon_number | "1"; | gene_type | " |
| Dt_chr8 | Cufflinks | exon | 43619659 | 43619745 | . | + | . | gene_id | "XLOC_217447"; | transcript_id | "Novel_003037"; | exon_number | "1"; | gene_type | " |
| Dt_chr8 | Cufflinks | exon | 43620084 | 43628973 | . | + | . | gene_id | "XLOC_217447"; | transcript_id | "Novel_003037"; | exon_number | "2"; | gene_type | " |
| Dt_chr8 | Cufflinks | exon | 43619661 | 43619745 | . | + | . | gene_id | "XLOC_217447"; | transcript_id | "Novel_003038"; | exon_number | "1"; | gene_type | " |
| Dt_chr8 | Cufflinks | exon | 43620084 | 43628365 | . | + | . | gene_id | "XLOC_217447"; | transcript_id | "Novel_003038"; | exon_number | "2"; | gene_type | " |
| Dt_chr8 | Cufflinks | exon | 43628596 | 43629104 | . | + | . | gene_id | "XLOC_217447"; | transcript_id | "Novel_003038"; | exon_number | "3"; | gene_type | " |
| Dt_chr8 | Cufflinks | exon | 43886633 | 43886657 | . | + | . | gene_id | "XLOC_217480"; | transcript_id | "Novel_003039"; | exon_number | "1"; | gene_type | " |
| Dt_chr8 | Cufflinks | exon | 43886782 | 43886829 | . | + | . | gene_id | "XLOC_217480"; | transcript_id | "Novel_003039"; | exon_number | "2"; | gene_type | " |
| Dt_chr8 | Cufflinks | exon | 43887099 | 43887154 | . | + | . | gene_id | "XLOC_217480"; | transcript_id | "Novel_003039"; | exon_number | "3"; | gene_type | " |
| Dt_chr8 | Cufflinks | exon | 43887298 | 43889067 | . | + | . | gene_id | "XLOC_217480"; | transcript_id | "Novel_003039"; | exon_number | "4"; | gene_type | " |
| Dt_chr8 | Cufflinks | exon | 44589844 | 44590676 | . | + | . | gene_id | "XLOC_217583"; | transcript_id | "Novel_003040"; | exon_number | "1"; | gene_type | " |
| Dt_chr8 | Cufflinks | exon | 44590767 | 44591192 | . | + | . | gene_id | "XLOC_217583"; | transcript_id | "Novel_003040"; | exon_number | "2"; | gene_type | " |
| Dt_chr8 | Cufflinks | exon | 44589944 | 44590676 | . | + | . | gene_id | "XLOC_217583"; | transcript_id | "Novel_003041"; | exon_number | "1"; | gene_type | " |
| Dt_chr8 | Cufflinks | exon | 44590767 | 44591112 | . | + | . | gene_id | "XLOC_217583"; | transcript_id | "Novel_003041"; | exon_number | "2"; | gene_type | " |
| Dt_chr8 | Cufflinks | exon | 44591191 | 44591239 | . | + | . | gene_id | "XLOC_217583"; | transcript_id | "Novel_003041"; | exon_number | "3"; | gene_type | " |
| Dt_chr8 | Cufflinks | exon | 44591328 | 44591399 | . | + | . | gene_id | "XLOC_217583"; | transcript_id | "Novel_003041"; | exon_number | "4"; | gene_type | " |

|         |           |      |          |          |   |   |   |         |                |               |                 |             |       |           |   |
|---------|-----------|------|----------|----------|---|---|---|---------|----------------|---------------|-----------------|-------------|-------|-----------|---|
| Dt_chr8 | Cufflinks | exon | 44591498 | 44591627 | . | + | . | gene_id | "XLOC_217583"; | transcript_id | "Novel_003041"; | exon_number | "5";  | gene_type | " |
| Dt_chr8 | Cufflinks | exon | 44591728 | 44592188 | . | + | . | gene_id | "XLOC_217583"; | transcript_id | "Novel_003041"; | exon_number | "6";  | gene_type | " |
| Dt_chr8 | Cufflinks | exon | 44592280 | 44592384 | . | + | . | gene_id | "XLOC_217583"; | transcript_id | "Novel_003041"; | exon_number | "7";  | gene_type | " |
| Dt_chr8 | Cufflinks | exon | 44592493 | 44592537 | . | + | . | gene_id | "XLOC_217583"; | transcript_id | "Novel_003041"; | exon_number | "8";  | gene_type | " |
| Dt_chr8 | Cufflinks | exon | 44592624 | 44592773 | . | + | . | gene_id | "XLOC_217583"; | transcript_id | "Novel_003041"; | exon_number | "9";  | gene_type | " |
| Dt_chr8 | Cufflinks | exon | 44592875 | 44593153 | . | + | . | gene_id | "XLOC_217583"; | transcript_id | "Novel_003041"; | exon_number | "10"; | gene_type | " |
| Dt_chr8 | Cufflinks | exon | 44593233 | 44593369 | . | + | . | gene_id | "XLOC_217583"; | transcript_id | "Novel_003041"; | exon_number | "11"; | gene_type | " |
| Dt_chr8 | Cufflinks | exon | 44593460 | 44593668 | . | + | . | gene_id | "XLOC_217583"; | transcript_id | "Novel_003041"; | exon_number | "12"; | gene_type | " |
| Dt_chr8 | Cufflinks | exon | 44589968 | 44590676 | . | + | . | gene_id | "XLOC_217583"; | transcript_id | "Novel_003042"; | exon_number | "1";  | gene_type | " |
| Dt_chr8 | Cufflinks | exon | 44590767 | 44591112 | . | + | . | gene_id | "XLOC_217583"; | transcript_id | "Novel_003042"; | exon_number | "2";  | gene_type | " |
| Dt_chr8 | Cufflinks | exon | 44591191 | 44591239 | . | + | . | gene_id | "XLOC_217583"; | transcript_id | "Novel_003042"; | exon_number | "3";  | gene_type | " |
| Dt_chr8 | Cufflinks | exon | 44591328 | 44591399 | . | + | . | gene_id | "XLOC_217583"; | transcript_id | "Novel_003042"; | exon_number | "4";  | gene_type | " |
| Dt_chr8 | Cufflinks | exon | 44591498 | 44591627 | . | + | . | gene_id | "XLOC_217583"; | transcript_id | "Novel_003042"; | exon_number | "5";  | gene_type | " |
| Dt_chr8 | Cufflinks | exon | 44591728 | 44591848 | . | + | . | gene_id | "XLOC_217583"; | transcript_id | "Novel_003042"; | exon_number | "6";  | gene_type | " |
| Dt_chr8 | Cufflinks | exon | 44591930 | 44592188 | . | + | . | gene_id | "XLOC_217583"; | transcript_id | "Novel_003042"; | exon_number | "7";  | gene_type | " |
| Dt_chr8 | Cufflinks | exon | 44592280 | 44592384 | . | + | . | gene_id | "XLOC_217583"; | transcript_id | "Novel_003042"; | exon_number | "8";  | gene_type | " |
| Dt_chr8 | Cufflinks | exon | 44592493 | 44592537 | . | + | . | gene_id | "XLOC_217583"; | transcript_id | "Novel_003042"; | exon_number | "9";  | gene_type | " |
| Dt_chr8 | Cufflinks | exon | 44592624 | 44592773 | . | + | . | gene_id | "XLOC_217583"; | transcript_id | "Novel_003042"; | exon_number | "10"; | gene_type | " |
| Dt_chr8 | Cufflinks | exon | 44592875 | 44593153 | . | + | . | gene_id | "XLOC_217583"; | transcript_id | "Novel_003042"; | exon_number | "11"; | gene_type | " |
| Dt_chr8 | Cufflinks | exon | 44593233 | 44593369 | . | + | . | gene_id | "XLOC_217583"; | transcript_id | "Novel_003042"; | exon_number | "12"; | gene_type | " |
| Dt_chr8 | Cufflinks | exon | 44593460 | 44593670 | . | + | . | gene_id | "XLOC_217583"; | transcript_id | "Novel_003042"; | exon_number | "13"; | gene_type | " |
| Dt_chr8 | Cufflinks | exon | 45463160 | 45463545 | . | + | . | gene_id | "XLOC_217691"; | transcript_id | "Novel_003043"; | exon_number | "1";  | gene_type | " |
| Dt_chr8 | Cufflinks | exon | 45833768 | 45834246 | . | + | . | gene_id | "XLOC_217741"; | transcript_id | "Novel_003044"; | exon_number | "1";  | gene_type | " |
| Dt_chr8 | Cufflinks | exon | 45834331 | 45834625 | . | + | . | gene_id | "XLOC_217741"; | transcript_id | "Novel_003044"; | exon_number | "2";  | gene_type | " |
| Dt_chr8 | Cufflinks | exon | 45834937 | 45835357 | . | + | . | gene_id | "XLOC_217741"; | transcript_id | "Novel_003044"; | exon_number | "3";  | gene_type | " |
| Dt_chr8 | Cufflinks | exon | 45835485 | 45835533 | . | + | . | gene_id | "XLOC_217741"; | transcript_id | "Novel_003044"; | exon_number | "4";  | gene_type | " |
| Dt_chr8 | Cufflinks | exon | 45835632 | 45835703 | . | + | . | gene_id | "XLOC_217741"; | transcript_id | "Novel_003044"; | exon_number | "5";  | gene_type | " |
| Dt_chr8 | Cufflinks | exon | 45835995 | 45836124 | . | + | . | gene_id | "XLOC_217741"; | transcript_id | "Novel_003044"; | exon_number | "6";  | gene_type | " |
| Dt_chr8 | Cufflinks | exon | 45836707 | 45836827 | . | + | . | gene_id | "XLOC_217741"; | transcript_id | "Novel_003044"; | exon_number | "7";  | gene_type | " |
| Dt_chr8 | Cufflinks | exon | 45836908 | 45837157 | . | + | . | gene_id | "XLOC_217741"; | transcript_id | "Novel_003044"; | exon_number | "8";  | gene_type | " |
| Dt_chr8 | Cufflinks | exon | 45837248 | 45837352 | . | + | . | gene_id | "XLOC_217741"; | transcript_id | "Novel_003044"; | exon_number | "9";  | gene_type | " |
| Dt_chr8 | Cufflinks | exon | 45837455 | 45837499 | . | + | . | gene_id | "XLOC_217741"; | transcript_id | "Novel_003044"; | exon_number | "10"; | gene_type | " |
| Dt_chr8 | Cufflinks | exon | 45837590 | 45837742 | . | + | . | gene_id | "XLOC_217741"; | transcript_id | "Novel_003044"; | exon_number | "11"; | gene_type | " |
| Dt_chr8 | Cufflinks | exon | 45837853 | 45838131 | . | + | . | gene_id | "XLOC_217741"; | transcript_id | "Novel_003044"; | exon_number | "12"; | gene_type | " |
| Dt_chr8 | Cufflinks | exon | 45838488 | 45838624 | . | + | . | gene_id | "XLOC_217741"; | transcript_id | "Novel_003044"; | exon_number | "13"; | gene_type | " |

|         |           |      |          |          |   |   |   |         |                |               |                 |             |       |           |  |
|---------|-----------|------|----------|----------|---|---|---|---------|----------------|---------------|-----------------|-------------|-------|-----------|--|
| Dt_chr8 | Cufflinks | exon | 45838756 | 45839213 | . | + | . | gene_id | "XLOC_217741"; | transcript_id | "Novel_003044"; | exon_number | "14"; | gene_type |  |
| Dt_chr8 | Cufflinks | exon | 46740357 | 46740486 | . | + | . | gene_id | "XLOC_217841"; | transcript_id | "Novel_003045"; | exon_number | "1";  | gene_type |  |
| Dt_chr8 | Cufflinks | exon | 46741748 | 46741866 | . | + | . | gene_id | "XLOC_217841"; | transcript_id | "Novel_003045"; | exon_number | "2";  | gene_type |  |
| Dt_chr8 | Cufflinks | exon | 46742450 | 46742982 | . | + | . | gene_id | "XLOC_217841"; | transcript_id | "Novel_003045"; | exon_number | "3";  | gene_type |  |
| Dt_chr8 | Cufflinks | exon | 46743088 | 46743544 | . | + | . | gene_id | "XLOC_217841"; | transcript_id | "Novel_003045"; | exon_number | "4";  | gene_type |  |
| Dt_chr8 | Cufflinks | exon | 46740428 | 46740486 | . | + | . | gene_id | "XLOC_217841"; | transcript_id | "Novel_003046"; | exon_number | "1";  | gene_type |  |
| Dt_chr8 | Cufflinks | exon | 46741748 | 46741866 | . | + | . | gene_id | "XLOC_217841"; | transcript_id | "Novel_003046"; | exon_number | "2";  | gene_type |  |
| Dt_chr8 | Cufflinks | exon | 46742450 | 46743121 | . | + | . | gene_id | "XLOC_217841"; | transcript_id | "Novel_003046"; | exon_number | "3";  | gene_type |  |
| Dt_chr8 | Cufflinks | exon | 48155578 | 48157381 | . | + | . | gene_id | "XLOC_218027"; | transcript_id | "Novel_003047"; | exon_number | "1";  | gene_type |  |
| Dt_chr8 | Cufflinks | exon | 48157588 | 48159162 | . | + | . | gene_id | "XLOC_218027"; | transcript_id | "Novel_003047"; | exon_number | "2";  | gene_type |  |
| Dt_chr8 | Cufflinks | exon | 49032336 | 49032781 | . | + | . | gene_id | "XLOC_218168"; | transcript_id | "Novel_003048"; | exon_number | "1";  | gene_type |  |
| Dt_chr8 | Cufflinks | exon | 49032894 | 49033031 | . | + | . | gene_id | "XLOC_218168"; | transcript_id | "Novel_003048"; | exon_number | "2";  | gene_type |  |
| Dt_chr8 | Cufflinks | exon | 49033124 | 49033565 | . | + | . | gene_id | "XLOC_218168"; | transcript_id | "Novel_003048"; | exon_number | "3";  | gene_type |  |
| Dt_chr8 | Cufflinks | exon | 49419843 | 49419946 | . | + | . | gene_id | "XLOC_218243"; | transcript_id | "Novel_003049"; | exon_number | "1";  | gene_type |  |
| Dt_chr8 | Cufflinks | exon | 49420188 | 49420381 | . | + | . | gene_id | "XLOC_218243"; | transcript_id | "Novel_003049"; | exon_number | "2";  | gene_type |  |
| Dt_chr8 | Cufflinks | exon | 49420489 | 49421236 | . | + | . | gene_id | "XLOC_218243"; | transcript_id | "Novel_003049"; | exon_number | "3";  | gene_type |  |
| Dt_chr8 | Cufflinks | exon | 49419848 | 49419946 | . | + | . | gene_id | "XLOC_218243"; | transcript_id | "Novel_003050"; | exon_number | "1";  | gene_type |  |
| Dt_chr8 | Cufflinks | exon | 49420188 | 49420381 | . | + | . | gene_id | "XLOC_218243"; | transcript_id | "Novel_003050"; | exon_number | "2";  | gene_type |  |
| Dt_chr8 | Cufflinks | exon | 49420489 | 49420656 | . | + | . | gene_id | "XLOC_218243"; | transcript_id | "Novel_003050"; | exon_number | "3";  | gene_type |  |
| Dt_chr8 | Cufflinks | exon | 49421250 | 49421343 | . | + | . | gene_id | "XLOC_218243"; | transcript_id | "Novel_003050"; | exon_number | "4";  | gene_type |  |
| Dt_chr8 | Cufflinks | exon | 49421889 | 49422646 | . | + | . | gene_id | "XLOC_218243"; | transcript_id | "Novel_003050"; | exon_number | "5";  | gene_type |  |
| Dt_chr8 | Cufflinks | exon | 49419852 | 49419946 | . | + | . | gene_id | "XLOC_218243"; | transcript_id | "Novel_003051"; | exon_number | "1";  | gene_type |  |
| Dt_chr8 | Cufflinks | exon | 49420188 | 49420381 | . | + | . | gene_id | "XLOC_218243"; | transcript_id | "Novel_003051"; | exon_number | "2";  | gene_type |  |
| Dt_chr8 | Cufflinks | exon | 49420489 | 49420656 | . | + | . | gene_id | "XLOC_218243"; | transcript_id | "Novel_003051"; | exon_number | "3";  | gene_type |  |
| Dt_chr8 | Cufflinks | exon | 49421250 | 49421343 | . | + | . | gene_id | "XLOC_218243"; | transcript_id | "Novel_003051"; | exon_number | "4";  | gene_type |  |
| Dt_chr8 | Cufflinks | exon | 49421889 | 49422083 | . | + | . | gene_id | "XLOC_218243"; | transcript_id | "Novel_003051"; | exon_number | "5";  | gene_type |  |
| Dt_chr8 | Cufflinks | exon | 49422886 | 49423582 | . | + | . | gene_id | "XLOC_218243"; | transcript_id | "Novel_003051"; | exon_number | "6";  | gene_type |  |
| Dt_chr8 | Cufflinks | exon | 49437264 | 49437333 | . | + | . | gene_id | "XLOC_218252"; | transcript_id | "Novel_003052"; | exon_number | "1";  | gene_type |  |
| Dt_chr8 | Cufflinks | exon | 49437456 | 49437648 | . | + | . | gene_id | "XLOC_218252"; | transcript_id | "Novel_003052"; | exon_number | "2";  | gene_type |  |
| Dt_chr8 | Cufflinks | exon | 49945530 | 49947866 | . | + | . | gene_id | "XLOC_218352"; | transcript_id | "Novel_003053"; | exon_number | "1";  | gene_type |  |
| Dt_chr8 | Cufflinks | exon | 50239815 | 50240346 | . | + | . | gene_id | "XLOC_218399"; | transcript_id | "Novel_003054"; | exon_number | "1";  | gene_type |  |
| Dt_chr8 | Cufflinks | exon | 50448946 | 50449085 | . | + | . | gene_id | "XLOC_218439"; | transcript_id | "Novel_003055"; | exon_number | "1";  | gene_type |  |
| Dt_chr8 | Cufflinks | exon | 50449169 | 50449264 | . | + | . | gene_id | "XLOC_218439"; | transcript_id | "Novel_003055"; | exon_number | "2";  | gene_type |  |
| Dt_chr8 | Cufflinks | exon | 50449367 | 50449453 | . | + | . | gene_id | "XLOC_218439"; | transcript_id | "Novel_003055"; | exon_number | "3";  | gene_type |  |
| Dt_chr8 | Cufflinks | exon | 50450215 | 50450807 | . | + | . | gene_id | "XLOC_218439"; | transcript_id | "Novel_003055"; | exon_number | "4";  | gene_type |  |

|         |           |      |          |          |   |   |   |         |                |               |                 |             |      |           |   |
|---------|-----------|------|----------|----------|---|---|---|---------|----------------|---------------|-----------------|-------------|------|-----------|---|
| Dt_chr8 | Cufflinks | exon | 50451861 | 50451926 | . | + | . | gene_id | "XLOC_218439"; | transcript_id | "Novel_003055"; | exon_number | "5"; | gene_type | " |
| Dt_chr8 | Cufflinks | exon | 50452050 | 50452445 | . | + | . | gene_id | "XLOC_218439"; | transcript_id | "Novel_003055"; | exon_number | "6"; | gene_type | " |
| Dt_chr8 | Cufflinks | exon | 50448971 | 50449085 | . | + | . | gene_id | "XLOC_218439"; | transcript_id | "Novel_003056"; | exon_number | "1"; | gene_type | " |
| Dt_chr8 | Cufflinks | exon | 50449169 | 50449264 | . | + | . | gene_id | "XLOC_218439"; | transcript_id | "Novel_003056"; | exon_number | "2"; | gene_type | " |
| Dt_chr8 | Cufflinks | exon | 50449367 | 50449453 | . | + | . | gene_id | "XLOC_218439"; | transcript_id | "Novel_003056"; | exon_number | "3"; | gene_type | " |
| Dt_chr8 | Cufflinks | exon | 50450215 | 50451926 | . | + | . | gene_id | "XLOC_218439"; | transcript_id | "Novel_003056"; | exon_number | "4"; | gene_type | " |
| Dt_chr8 | Cufflinks | exon | 50452050 | 50452353 | . | + | . | gene_id | "XLOC_218439"; | transcript_id | "Novel_003056"; | exon_number | "5"; | gene_type | " |
| Dt_chr8 | Cufflinks | exon | 50596854 | 50597014 | . | + | . | gene_id | "XLOC_218474"; | transcript_id | "Novel_003057"; | exon_number | "1"; | gene_type | " |
| Dt_chr8 | Cufflinks | exon | 50598160 | 50598576 | . | + | . | gene_id | "XLOC_218474"; | transcript_id | "Novel_003057"; | exon_number | "2"; | gene_type | " |
| Dt_chr8 | Cufflinks | exon | 50604067 | 50604535 | . | + | . | gene_id | "XLOC_218477"; | transcript_id | "Novel_003058"; | exon_number | "1"; | gene_type | " |
| Dt_chr8 | Cufflinks | exon | 50605904 | 50606683 | . | + | . | gene_id | "XLOC_218477"; | transcript_id | "Novel_003058"; | exon_number | "2"; | gene_type | " |
| Dt_chr8 | Cufflinks | exon | 50606774 | 50607960 | . | + | . | gene_id | "XLOC_218477"; | transcript_id | "Novel_003058"; | exon_number | "3"; | gene_type | " |
| Dt_chr8 | Cufflinks | exon | 51970362 | 51971313 | . | + | . | gene_id | "XLOC_218625"; | transcript_id | "Novel_003059"; | exon_number | "1"; | gene_type | " |
| Dt_chr8 | Cufflinks | exon | 51971473 | 51971557 | . | + | . | gene_id | "XLOC_218625"; | transcript_id | "Novel_003059"; | exon_number | "2"; | gene_type | " |
| Dt_chr8 | Cufflinks | exon | 51972634 | 51972833 | . | + | . | gene_id | "XLOC_218625"; | transcript_id | "Novel_003059"; | exon_number | "3"; | gene_type | " |
| Dt_chr8 | Cufflinks | exon | 51972923 | 51972943 | . | + | . | gene_id | "XLOC_218625"; | transcript_id | "Novel_003059"; | exon_number | "4"; | gene_type | " |
| Dt_chr8 | Cufflinks | exon | 51970440 | 51971313 | . | + | . | gene_id | "XLOC_218625"; | transcript_id | "Novel_003060"; | exon_number | "1"; | gene_type | " |
| Dt_chr8 | Cufflinks | exon | 51971473 | 51971557 | . | + | . | gene_id | "XLOC_218625"; | transcript_id | "Novel_003060"; | exon_number | "2"; | gene_type | " |
| Dt_chr8 | Cufflinks | exon | 51972634 | 51972908 | . | + | . | gene_id | "XLOC_218625"; | transcript_id | "Novel_003060"; | exon_number | "3"; | gene_type | " |
| Dt_chr8 | Cufflinks | exon | 53139228 | 53139638 | . | + | . | gene_id | "XLOC_218774"; | transcript_id | "Novel_003061"; | exon_number | "1"; | gene_type | " |
| Dt_chr8 | Cufflinks | exon | 53139765 | 53139911 | . | + | . | gene_id | "XLOC_218774"; | transcript_id | "Novel_003061"; | exon_number | "2"; | gene_type | " |
| Dt_chr8 | Cufflinks | exon | 53140222 | 53140253 | . | + | . | gene_id | "XLOC_218774"; | transcript_id | "Novel_003061"; | exon_number | "3"; | gene_type | " |
| Dt_chr8 | Cufflinks | exon | 53139950 | 53140343 | . | + | . | gene_id | "XLOC_218774"; | transcript_id | "Novel_003062"; | exon_number | "1"; | gene_type | " |
| Dt_chr8 | Cufflinks | exon | 53140429 | 53140809 | . | + | . | gene_id | "XLOC_218774"; | transcript_id | "Novel_003062"; | exon_number | "2"; | gene_type | " |
| Dt_chr8 | Cufflinks | exon | 53140914 | 53140924 | . | + | . | gene_id | "XLOC_218774"; | transcript_id | "Novel_003063"; | exon_number | "1"; | gene_type | " |
| Dt_chr8 | Cufflinks | exon | 53141299 | 53142450 | . | + | . | gene_id | "XLOC_218774"; | transcript_id | "Novel_003063"; | exon_number | "2"; | gene_type | " |
| Dt_chr8 | Cufflinks | exon | 54764626 | 54765470 | . | + | . | gene_id | "XLOC_219004"; | transcript_id | "Novel_003064"; | exon_number | "1"; | gene_type | " |
| Dt_chr8 | Cufflinks | exon | 54765577 | 54766651 | . | + | . | gene_id | "XLOC_219004"; | transcript_id | "Novel_003064"; | exon_number | "2"; | gene_type | " |
| Dt_chr8 | Cufflinks | exon | 56614623 | 56614827 | . | + | . | gene_id | "XLOC_219288"; | transcript_id | "Novel_003065"; | exon_number | "1"; | gene_type | " |
| Dt_chr8 | Cufflinks | exon | 56615296 | 56615467 | . | + | . | gene_id | "XLOC_219288"; | transcript_id | "Novel_003065"; | exon_number | "2"; | gene_type | " |
| Dt_chr8 | Cufflinks | exon | 56615695 | 56615811 | . | + | . | gene_id | "XLOC_219288"; | transcript_id | "Novel_003065"; | exon_number | "3"; | gene_type | " |
| Dt_chr8 | Cufflinks | exon | 56616077 | 56616498 | . | + | . | gene_id | "XLOC_219288"; | transcript_id | "Novel_003065"; | exon_number | "4"; | gene_type | " |
| Dt_chr8 | Cufflinks | exon | 56614651 | 56614827 | . | + | . | gene_id | "XLOC_219288"; | transcript_id | "Novel_003066"; | exon_number | "1"; | gene_type | " |
| Dt_chr8 | Cufflinks | exon | 56615366 | 56615467 | . | + | . | gene_id | "XLOC_219288"; | transcript_id | "Novel_003066"; | exon_number | "2"; | gene_type | " |
| Dt_chr8 | Cufflinks | exon | 56615695 | 56615811 | . | + | . | gene_id | "XLOC_219288"; | transcript_id | "Novel_003066"; | exon_number | "3"; | gene_type | " |

|         |           |      |          |          |   |   |   |         |                |               |                 |             |      |           |   |
|---------|-----------|------|----------|----------|---|---|---|---------|----------------|---------------|-----------------|-------------|------|-----------|---|
| Dt_chr8 | Cufflinks | exon | 56616077 | 56616483 | . | + | . | gene_id | "XLOC_219288"; | transcript_id | "Novel_003066"; | exon_number | "4"; | gene_type | " |
| Dt_chr8 | Cufflinks | exon | 902574   | 903033   | . | - | . | gene_id | "XLOC_219463"; | transcript_id | "Novel_003067"; | exon_number | "1"; | gene_type | " |
| Dt_chr8 | Cufflinks | exon | 903668   | 903698   | . | - | . | gene_id | "XLOC_219463"; | transcript_id | "Novel_003067"; | exon_number | "2"; | gene_type | " |
| Dt_chr8 | Cufflinks | exon | 902631   | 904028   | . | - | . | gene_id | "XLOC_219463"; | transcript_id | "Novel_003068"; | exon_number | "1"; | gene_type | " |
| Dt_chr8 | Cufflinks | exon | 904518   | 904701   | . | - | . | gene_id | "XLOC_219463"; | transcript_id | "Novel_003068"; | exon_number | "2"; | gene_type | " |
| Dt_chr8 | Cufflinks | exon | 908872   | 909847   | . | - | . | gene_id | "XLOC_219464"; | transcript_id | "Novel_003069"; | exon_number | "1"; | gene_type | " |
| Dt_chr8 | Cufflinks | exon | 910008   | 910192   | . | - | . | gene_id | "XLOC_219464"; | transcript_id | "Novel_003069"; | exon_number | "2"; | gene_type | " |
| Dt_chr8 | Cufflinks | exon | 910391   | 910806   | . | - | . | gene_id | "XLOC_219464"; | transcript_id | "Novel_003069"; | exon_number | "3"; | gene_type | " |
| Dt_chr8 | Cufflinks | exon | 911063   | 911262   | . | - | . | gene_id | "XLOC_219464"; | transcript_id | "Novel_003069"; | exon_number | "4"; | gene_type | " |
| Dt_chr8 | Cufflinks | exon | 911346   | 911417   | . | - | . | gene_id | "XLOC_219464"; | transcript_id | "Novel_003069"; | exon_number | "5"; | gene_type | " |
| Dt_chr8 | Cufflinks | exon | 911946   | 912125   | . | - | . | gene_id | "XLOC_219464"; | transcript_id | "Novel_003069"; | exon_number | "6"; | gene_type | " |
| Dt_chr8 | Cufflinks | exon | 912334   | 912452   | . | - | . | gene_id | "XLOC_219464"; | transcript_id | "Novel_003069"; | exon_number | "7"; | gene_type | " |
| Dt_chr8 | Cufflinks | exon | 912619   | 912722   | . | - | . | gene_id | "XLOC_219464"; | transcript_id | "Novel_003069"; | exon_number | "8"; | gene_type | " |
| Dt_chr8 | Cufflinks | exon | 2632666  | 2632856  | . | - | . | gene_id | "XLOC_219645"; | transcript_id | "Novel_003070"; | exon_number | "1"; | gene_type | " |
| Dt_chr8 | Cufflinks | exon | 2633290  | 2633362  | . | - | . | gene_id | "XLOC_219645"; | transcript_id | "Novel_003070"; | exon_number | "2"; | gene_type | " |
| Dt_chr8 | Cufflinks | exon | 2633674  | 2634025  | . | - | . | gene_id | "XLOC_219645"; | transcript_id | "Novel_003070"; | exon_number | "3"; | gene_type | " |
| Dt_chr8 | Cufflinks | exon | 2634137  | 2634186  | . | - | . | gene_id | "XLOC_219645"; | transcript_id | "Novel_003070"; | exon_number | "4"; | gene_type | " |
| Dt_chr8 | Cufflinks | exon | 2634479  | 2634913  | . | - | . | gene_id | "XLOC_219645"; | transcript_id | "Novel_003070"; | exon_number | "5"; | gene_type | " |
| Dt_chr8 | Cufflinks | exon | 3431000  | 3431448  | . | - | . | gene_id | "XLOC_219711"; | transcript_id | "Novel_003071"; | exon_number | "1"; | gene_type | " |
| Dt_chr8 | Cufflinks | exon | 3431553  | 3431605  | . | - | . | gene_id | "XLOC_219711"; | transcript_id | "Novel_003071"; | exon_number | "2"; | gene_type | " |
| Dt_chr8 | Cufflinks | exon | 3431688  | 3432007  | . | - | . | gene_id | "XLOC_219711"; | transcript_id | "Novel_003071"; | exon_number | "3"; | gene_type | " |
| Dt_chr8 | Cufflinks | exon | 3432543  | 3432591  | . | - | . | gene_id | "XLOC_219711"; | transcript_id | "Novel_003071"; | exon_number | "4"; | gene_type | " |
| Dt_chr8 | Cufflinks | exon | 3432707  | 3432808  | . | - | . | gene_id | "XLOC_219711"; | transcript_id | "Novel_003071"; | exon_number | "5"; | gene_type | " |
| Dt_chr8 | Cufflinks | exon | 6525327  | 6525729  | . | - | . | gene_id | "XLOC_220048"; | transcript_id | "Novel_003072"; | exon_number | "1"; | gene_type | " |
| Dt_chr8 | Cufflinks | exon | 6525903  | 6525943  | . | - | . | gene_id | "XLOC_220048"; | transcript_id | "Novel_003072"; | exon_number | "2"; | gene_type | " |
| Dt_chr8 | Cufflinks | exon | 6526113  | 6526617  | . | - | . | gene_id | "XLOC_220048"; | transcript_id | "Novel_003072"; | exon_number | "3"; | gene_type | " |
| Dt_chr8 | Cufflinks | exon | 6526921  | 6527394  | . | - | . | gene_id | "XLOC_220048"; | transcript_id | "Novel_003072"; | exon_number | "4"; | gene_type | " |
| Dt_chr8 | Cufflinks | exon | 6528100  | 6528214  | . | - | . | gene_id | "XLOC_220048"; | transcript_id | "Novel_003072"; | exon_number | "5"; | gene_type | " |
| Dt_chr8 | Cufflinks | exon | 6528485  | 6528848  | . | - | . | gene_id | "XLOC_220048"; | transcript_id | "Novel_003072"; | exon_number | "6"; | gene_type | " |
| Dt_chr8 | Cufflinks | exon | 9130901  | 9131470  | . | - | . | gene_id | "XLOC_220199"; | transcript_id | "Novel_003073"; | exon_number | "1"; | gene_type | " |
| Dt_chr8 | Cufflinks | exon | 9131696  | 9132348  | . | - | . | gene_id | "XLOC_220199"; | transcript_id | "Novel_003073"; | exon_number | "2"; | gene_type | " |
| Dt_chr8 | Cufflinks | exon | 10346823 | 10347061 | . | - | . | gene_id | "XLOC_220265"; | transcript_id | "Novel_003074"; | exon_number | "1"; | gene_type | " |
| Dt_chr8 | Cufflinks | exon | 13485143 | 13485193 | . | - | . | gene_id | "XLOC_220418"; | transcript_id | "Novel_003075"; | exon_number | "1"; | gene_type | " |
| Dt_chr8 | Cufflinks | exon | 13486151 | 13486194 | . | - | . | gene_id | "XLOC_220418"; | transcript_id | "Novel_003075"; | exon_number | "2"; | gene_type | " |
| Dt_chr8 | Cufflinks | exon | 13486282 | 13486386 | . | - | . | gene_id | "XLOC_220418"; | transcript_id | "Novel_003075"; | exon_number | "3"; | gene_type | " |

|         |           |      |          |          |   |   |         |                |               |                 |             |      |           |   |
|---------|-----------|------|----------|----------|---|---|---------|----------------|---------------|-----------------|-------------|------|-----------|---|
| Dt_chr8 | Cufflinks | exon | 13485143 | 13485193 | . | . | gene_id | "XLOC_220418"; | transcript_id | "Novel_003076"; | exon_number | "1"; | gene_type | " |
| Dt_chr8 | Cufflinks | exon | 13486151 | 13486194 | . | . | gene_id | "XLOC_220418"; | transcript_id | "Novel_003076"; | exon_number | "2"; | gene_type | " |
| Dt_chr8 | Cufflinks | exon | 13486282 | 13486355 | . | . | gene_id | "XLOC_220418"; | transcript_id | "Novel_003076"; | exon_number | "3"; | gene_type | " |
| Dt_chr8 | Cufflinks | exon | 13486454 | 13486485 | . | . | gene_id | "XLOC_220418"; | transcript_id | "Novel_003076"; | exon_number | "4"; | gene_type | " |
| Dt_chr8 | Cufflinks | exon | 13905417 | 13905683 | . | . | gene_id | "XLOC_220445"; | transcript_id | "Novel_003077"; | exon_number | "1"; | gene_type | " |
| Dt_chr8 | Cufflinks | exon | 20064096 | 20065422 | . | . | gene_id | "XLOC_220745"; | transcript_id | "Novel_003078"; | exon_number | "1"; | gene_type | " |
| Dt_chr8 | Cufflinks | exon | 20065629 | 20067382 | . | . | gene_id | "XLOC_220745"; | transcript_id | "Novel_003078"; | exon_number | "2"; | gene_type | " |
| Dt_chr8 | Cufflinks | exon | 20251819 | 20255194 | . | . | gene_id | "XLOC_220754"; | transcript_id | "Novel_003079"; | exon_number | "1"; | gene_type | " |
| Dt_chr8 | Cufflinks | exon | 20255430 | 20256752 | . | . | gene_id | "XLOC_220754"; | transcript_id | "Novel_003079"; | exon_number | "2"; | gene_type | " |
| Dt_chr8 | Cufflinks | exon | 20251952 | 20252068 | . | . | gene_id | "XLOC_220754"; | transcript_id | "Novel_003080"; | exon_number | "1"; | gene_type | " |
| Dt_chr8 | Cufflinks | exon | 20255089 | 20255194 | . | . | gene_id | "XLOC_220754"; | transcript_id | "Novel_003080"; | exon_number | "2"; | gene_type | " |
| Dt_chr8 | Cufflinks | exon | 20255430 | 20256741 | . | . | gene_id | "XLOC_220754"; | transcript_id | "Novel_003080"; | exon_number | "3"; | gene_type | " |
| Dt_chr8 | Cufflinks | exon | 23459661 | 23460258 | . | . | gene_id | "XLOC_220982"; | transcript_id | "Novel_003081"; | exon_number | "1"; | gene_type | " |
| Dt_chr8 | Cufflinks | exon | 23460355 | 23460549 | . | . | gene_id | "XLOC_220982"; | transcript_id | "Novel_003081"; | exon_number | "2"; | gene_type | " |
| Dt_chr8 | Cufflinks | exon | 23460827 | 23461776 | . | . | gene_id | "XLOC_220982"; | transcript_id | "Novel_003081"; | exon_number | "3"; | gene_type | " |
| Dt_chr8 | Cufflinks | exon | 23461821 | 23463945 | . | . | gene_id | "XLOC_220982"; | transcript_id | "Novel_003082"; | exon_number | "1"; | gene_type | " |
| Dt_chr8 | Cufflinks | exon | 23464024 | 23465463 | . | . | gene_id | "XLOC_220982"; | transcript_id | "Novel_003082"; | exon_number | "2"; | gene_type | " |
| Dt_chr8 | Cufflinks | exon | 23465835 | 23465891 | . | . | gene_id | "XLOC_220982"; | transcript_id | "Novel_003082"; | exon_number | "3"; | gene_type | " |
| Dt_chr8 | Cufflinks | exon | 23465981 | 23466048 | . | . | gene_id | "XLOC_220982"; | transcript_id | "Novel_003082"; | exon_number | "4"; | gene_type | " |
| Dt_chr8 | Cufflinks | exon | 23466208 | 23466357 | . | . | gene_id | "XLOC_220982"; | transcript_id | "Novel_003082"; | exon_number | "5"; | gene_type | " |
| Dt_chr8 | Cufflinks | exon | 23466460 | 23466593 | . | . | gene_id | "XLOC_220982"; | transcript_id | "Novel_003082"; | exon_number | "6"; | gene_type | " |
| Dt_chr8 | Cufflinks | exon | 23466758 | 23466997 | . | . | gene_id | "XLOC_220982"; | transcript_id | "Novel_003082"; | exon_number | "7"; | gene_type | " |
| Dt_chr8 | Cufflinks | exon | 23467071 | 23467093 | . | . | gene_id | "XLOC_220982"; | transcript_id | "Novel_003082"; | exon_number | "8"; | gene_type | " |
| Dt_chr8 | Cufflinks | exon | 23461875 | 23463945 | . | . | gene_id | "XLOC_220982"; | transcript_id | "Novel_003083"; | exon_number | "1"; | gene_type | " |
| Dt_chr8 | Cufflinks | exon | 23464024 | 23465463 | . | . | gene_id | "XLOC_220982"; | transcript_id | "Novel_003083"; | exon_number | "2"; | gene_type | " |
| Dt_chr8 | Cufflinks | exon | 23465835 | 23465891 | . | . | gene_id | "XLOC_220982"; | transcript_id | "Novel_003083"; | exon_number | "3"; | gene_type | " |
| Dt_chr8 | Cufflinks | exon | 23465981 | 23466048 | . | . | gene_id | "XLOC_220982"; | transcript_id | "Novel_003083"; | exon_number | "4"; | gene_type | " |
| Dt_chr8 | Cufflinks | exon | 23466208 | 23466357 | . | . | gene_id | "XLOC_220982"; | transcript_id | "Novel_003083"; | exon_number | "5"; | gene_type | " |
| Dt_chr8 | Cufflinks | exon | 23466460 | 23467306 | . | . | gene_id | "XLOC_220982"; | transcript_id | "Novel_003083"; | exon_number | "6"; | gene_type | " |
| Dt_chr8 | Cufflinks | exon | 23461896 | 23463945 | . | . | gene_id | "XLOC_220982"; | transcript_id | "Novel_003084"; | exon_number | "1"; | gene_type | " |
| Dt_chr8 | Cufflinks | exon | 23464024 | 23465463 | . | . | gene_id | "XLOC_220982"; | transcript_id | "Novel_003084"; | exon_number | "2"; | gene_type | " |
| Dt_chr8 | Cufflinks | exon | 23465835 | 23465891 | . | . | gene_id | "XLOC_220982"; | transcript_id | "Novel_003084"; | exon_number | "3"; | gene_type | " |
| Dt_chr8 | Cufflinks | exon | 23465981 | 23466048 | . | . | gene_id | "XLOC_220982"; | transcript_id | "Novel_003084"; | exon_number | "4"; | gene_type | " |
| Dt_chr8 | Cufflinks | exon | 23466208 | 23467149 | . | . | gene_id | "XLOC_220982"; | transcript_id | "Novel_003084"; | exon_number | "5"; | gene_type | " |
| Dt_chr8 | Cufflinks | exon | 23889039 | 23889789 | . | . | gene_id | "XLOC_221040"; | transcript_id | "Novel_003085"; | exon_number | "1"; | gene_type | " |



|         |           |      |          |          |   |   |   |         |                |               |                 |             |      |           |   |
|---------|-----------|------|----------|----------|---|---|---|---------|----------------|---------------|-----------------|-------------|------|-----------|---|
| Dt_chr8 | Cufflinks | exon | 23890043 | 23890192 | . | - | . | gene_id | "XLOC_221040"; | transcript_id | "Novel_003085"; | exon_number | "2"; | gene_type | " |
| Dt_chr8 | Cufflinks | exon | 23911519 | 23912043 | . | - | . | gene_id | "XLOC_221042"; | transcript_id | "Novel_003086"; | exon_number | "1"; | gene_type | " |
| Dt_chr8 | Cufflinks | exon | 23913508 | 23913536 | . | - | . | gene_id | "XLOC_221042"; | transcript_id | "Novel_003086"; | exon_number | "2"; | gene_type | " |
| Dt_chr8 | Cufflinks | exon | 23935124 | 23935444 | . | - | . | gene_id | "XLOC_221052"; | transcript_id | "Novel_003087"; | exon_number | "1"; | gene_type | " |
| Dt_chr8 | Cufflinks | exon | 23935780 | 23935912 | . | - | . | gene_id | "XLOC_221052"; | transcript_id | "Novel_003087"; | exon_number | "2"; | gene_type | " |
| Dt_chr8 | Cufflinks | exon | 23935999 | 23936047 | . | - | . | gene_id | "XLOC_221052"; | transcript_id | "Novel_003087"; | exon_number | "3"; | gene_type | " |
| Dt_chr8 | Cufflinks | exon | 23937971 | 23938077 | . | - | . | gene_id | "XLOC_221052"; | transcript_id | "Novel_003087"; | exon_number | "4"; | gene_type | " |
| Dt_chr8 | Cufflinks | exon | 26233105 | 26234093 | . | - | . | gene_id | "XLOC_221187"; | transcript_id | "Novel_003088"; | exon_number | "1"; | gene_type | " |
| Dt_chr8 | Cufflinks | exon | 26234209 | 26234278 | . | - | . | gene_id | "XLOC_221187"; | transcript_id | "Novel_003088"; | exon_number | "2"; | gene_type | " |
| Dt_chr8 | Cufflinks | exon | 29128049 | 29128273 | . | - | . | gene_id | "XLOC_221318"; | transcript_id | "Novel_003089"; | exon_number | "1"; | gene_type | " |
| Dt_chr8 | Cufflinks | exon | 29129941 | 29130042 | . | - | . | gene_id | "XLOC_221318"; | transcript_id | "Novel_003089"; | exon_number | "2"; | gene_type | " |
| Dt_chr8 | Cufflinks | exon | 29973012 | 29973928 | . | - | . | gene_id | "XLOC_221342"; | transcript_id | "Novel_003090"; | exon_number | "1"; | gene_type | " |
| Dt_chr8 | Cufflinks | exon | 29974387 | 29974611 | . | - | . | gene_id | "XLOC_221342"; | transcript_id | "Novel_003090"; | exon_number | "2"; | gene_type | " |
| Dt_chr8 | Cufflinks | exon | 30398449 | 30398739 | . | - | . | gene_id | "XLOC_221376"; | transcript_id | "Novel_003091"; | exon_number | "1"; | gene_type | " |
| Dt_chr8 | Cufflinks | exon | 30398823 | 30398938 | . | - | . | gene_id | "XLOC_221376"; | transcript_id | "Novel_003091"; | exon_number | "2"; | gene_type | " |
| Dt_chr8 | Cufflinks | exon | 30399672 | 30399929 | . | - | . | gene_id | "XLOC_221376"; | transcript_id | "Novel_003091"; | exon_number | "3"; | gene_type | " |
| Dt_chr8 | Cufflinks | exon | 33017628 | 33018255 | . | - | . | gene_id | "XLOC_221578"; | transcript_id | "Novel_003092"; | exon_number | "1"; | gene_type | " |
| Dt_chr8 | Cufflinks | exon | 33018363 | 33018635 | . | - | . | gene_id | "XLOC_221578"; | transcript_id | "Novel_003092"; | exon_number | "2"; | gene_type | " |
| Dt_chr8 | Cufflinks | exon | 33652290 | 33653600 | . | - | . | gene_id | "XLOC_221618"; | transcript_id | "Novel_003093"; | exon_number | "1"; | gene_type | " |
| Dt_chr8 | Cufflinks | exon | 33655625 | 33655983 | . | - | . | gene_id | "XLOC_221618"; | transcript_id | "Novel_003093"; | exon_number | "2"; | gene_type | " |
| Dt_chr8 | Cufflinks | exon | 33663297 | 33663566 | . | - | . | gene_id | "XLOC_221620"; | transcript_id | "Novel_003094"; | exon_number | "1"; | gene_type | " |
| Dt_chr8 | Cufflinks | exon | 33663648 | 33663685 | . | - | . | gene_id | "XLOC_221620"; | transcript_id | "Novel_003094"; | exon_number | "2"; | gene_type | " |
| Dt_chr8 | Cufflinks | exon | 33663756 | 33664160 | . | - | . | gene_id | "XLOC_221620"; | transcript_id | "Novel_003094"; | exon_number | "3"; | gene_type | " |
| Dt_chr8 | Cufflinks | exon | 33664232 | 33664515 | . | - | . | gene_id | "XLOC_221620"; | transcript_id | "Novel_003094"; | exon_number | "4"; | gene_type | " |
| Dt_chr8 | Cufflinks | exon | 33664624 | 33664708 | . | - | . | gene_id | "XLOC_221620"; | transcript_id | "Novel_003094"; | exon_number | "5"; | gene_type | " |
| Dt_chr8 | Cufflinks | exon | 33663365 | 33664515 | . | - | . | gene_id | "XLOC_221620"; | transcript_id | "Novel_003095"; | exon_number | "1"; | gene_type | " |
| Dt_chr8 | Cufflinks | exon | 33664624 | 33664785 | . | - | . | gene_id | "XLOC_221620"; | transcript_id | "Novel_003095"; | exon_number | "2"; | gene_type | " |
| Dt_chr8 | Cufflinks | exon | 34937550 | 34938464 | . | - | . | gene_id | "XLOC_221733"; | transcript_id | "Novel_003096"; | exon_number | "1"; | gene_type | " |
| Dt_chr8 | Cufflinks | exon | 35559765 | 35560043 | . | - | . | gene_id | "XLOC_221779"; | transcript_id | "Novel_003097"; | exon_number | "1"; | gene_type | " |
| Dt_chr8 | Cufflinks | exon | 35561068 | 35561174 | . | - | . | gene_id | "XLOC_221779"; | transcript_id | "Novel_003097"; | exon_number | "2"; | gene_type | " |
| Dt_chr8 | Cufflinks | exon | 35562118 | 35562196 | . | - | . | gene_id | "XLOC_221779"; | transcript_id | "Novel_003097"; | exon_number | "3"; | gene_type | " |
| Dt_chr8 | Cufflinks | exon | 35562404 | 35562481 | . | - | . | gene_id | "XLOC_221779"; | transcript_id | "Novel_003097"; | exon_number | "4"; | gene_type | " |
| Dt_chr8 | Cufflinks | exon | 35562633 | 35563049 | . | - | . | gene_id | "XLOC_221779"; | transcript_id | "Novel_003097"; | exon_number | "5"; | gene_type | " |
| Dt_chr8 | Cufflinks | exon | 35559767 | 35560043 | . | - | . | gene_id | "XLOC_221779"; | transcript_id | "Novel_003098"; | exon_number | "1"; | gene_type | " |
| Dt_chr8 | Cufflinks | exon | 35561068 | 35562196 | . | - | . | gene_id | "XLOC_221779"; | transcript_id | "Novel_003098"; | exon_number | "2"; | gene_type | " |

|         |           |      |          |          |   |   |   |         |                |               |                 |             |      |           |   |
|---------|-----------|------|----------|----------|---|---|---|---------|----------------|---------------|-----------------|-------------|------|-----------|---|
| Dt_chr8 | Cufflinks | exon | 35562404 | 35562481 | . | - | . | gene_id | "XLOC_221779"; | transcript_id | "Novel_003098"; | exon_number | "3"; | gene_type | " |
| Dt_chr8 | Cufflinks | exon | 35562633 | 35563022 | . | - | . | gene_id | "XLOC_221779"; | transcript_id | "Novel_003098"; | exon_number | "4"; | gene_type | " |
| Dt_chr8 | Cufflinks | exon | 35614365 | 35615835 | . | - | . | gene_id | "XLOC_221788"; | transcript_id | "Novel_003099"; | exon_number | "1"; | gene_type | " |
| Dt_chr8 | Cufflinks | exon | 35616016 | 35616127 | . | - | . | gene_id | "XLOC_221788"; | transcript_id | "Novel_003099"; | exon_number | "2"; | gene_type | " |
| Dt_chr8 | Cufflinks | exon | 35616254 | 35616445 | . | - | . | gene_id | "XLOC_221788"; | transcript_id | "Novel_003099"; | exon_number | "3"; | gene_type | " |
| Dt_chr8 | Cufflinks | exon | 35616704 | 35616729 | . | - | . | gene_id | "XLOC_221788"; | transcript_id | "Novel_003099"; | exon_number | "4"; | gene_type | " |
| Dt_chr8 | Cufflinks | exon | 35617016 | 35617742 | . | - | . | gene_id | "XLOC_221788"; | transcript_id | "Novel_003099"; | exon_number | "5"; | gene_type | " |
| Dt_chr8 | Cufflinks | exon | 35614365 | 35615835 | . | - | . | gene_id | "XLOC_221788"; | transcript_id | "Novel_003100"; | exon_number | "1"; | gene_type | " |
| Dt_chr8 | Cufflinks | exon | 35616016 | 35616127 | . | - | . | gene_id | "XLOC_221788"; | transcript_id | "Novel_003100"; | exon_number | "2"; | gene_type | " |
| Dt_chr8 | Cufflinks | exon | 35616254 | 35616729 | . | - | . | gene_id | "XLOC_221788"; | transcript_id | "Novel_003100"; | exon_number | "3"; | gene_type | " |
| Dt_chr8 | Cufflinks | exon | 35617016 | 35617742 | . | - | . | gene_id | "XLOC_221788"; | transcript_id | "Novel_003100"; | exon_number | "4"; | gene_type | " |
| Dt_chr8 | Cufflinks | exon | 35615921 | 35616127 | . | - | . | gene_id | "XLOC_221788"; | transcript_id | "Novel_003101"; | exon_number | "1"; | gene_type | " |
| Dt_chr8 | Cufflinks | exon | 35616254 | 35616445 | . | - | . | gene_id | "XLOC_221788"; | transcript_id | "Novel_003101"; | exon_number | "2"; | gene_type | " |
| Dt_chr8 | Cufflinks | exon | 35616635 | 35616729 | . | - | . | gene_id | "XLOC_221788"; | transcript_id | "Novel_003101"; | exon_number | "3"; | gene_type | " |
| Dt_chr8 | Cufflinks | exon | 35617016 | 35617274 | . | - | . | gene_id | "XLOC_221788"; | transcript_id | "Novel_003101"; | exon_number | "4"; | gene_type | " |
| Dt_chr8 | Cufflinks | exon | 36699819 | 36699900 | . | - | . | gene_id | "XLOC_221892"; | transcript_id | "Novel_003102"; | exon_number | "1"; | gene_type | " |
| Dt_chr8 | Cufflinks | exon | 36775550 | 36775683 | . | - | . | gene_id | "XLOC_221892"; | transcript_id | "Novel_003102"; | exon_number | "2"; | gene_type | " |
| Dt_chr8 | Cufflinks | exon | 36776655 | 36776714 | . | - | . | gene_id | "XLOC_221892"; | transcript_id | "Novel_003102"; | exon_number | "3"; | gene_type | " |
| Dt_chr8 | Cufflinks | exon | 36777095 | 36777238 | . | - | . | gene_id | "XLOC_221892"; | transcript_id | "Novel_003102"; | exon_number | "4"; | gene_type | " |
| Dt_chr8 | Cufflinks | exon | 36774144 | 36776714 | . | - | . | gene_id | "XLOC_221892"; | transcript_id | "Novel_003103"; | exon_number | "1"; | gene_type | " |
| Dt_chr8 | Cufflinks | exon | 36777095 | 36777259 | . | - | . | gene_id | "XLOC_221892"; | transcript_id | "Novel_003103"; | exon_number | "2"; | gene_type | " |
| Dt_chr8 | Cufflinks | exon | 36774144 | 36774740 | . | - | . | gene_id | "XLOC_221892"; | transcript_id | "Novel_003104"; | exon_number | "1"; | gene_type | " |
| Dt_chr8 | Cufflinks | exon | 36774906 | 36775010 | . | - | . | gene_id | "XLOC_221892"; | transcript_id | "Novel_003104"; | exon_number | "2"; | gene_type | " |
| Dt_chr8 | Cufflinks | exon | 36776655 | 36776714 | . | - | . | gene_id | "XLOC_221892"; | transcript_id | "Novel_003104"; | exon_number | "3"; | gene_type | " |
| Dt_chr8 | Cufflinks | exon | 36777095 | 36777259 | . | - | . | gene_id | "XLOC_221892"; | transcript_id | "Novel_003104"; | exon_number | "4"; | gene_type | " |
| Dt_chr8 | Cufflinks | exon | 36774318 | 36775010 | . | - | . | gene_id | "XLOC_221892"; | transcript_id | "Novel_003105"; | exon_number | "1"; | gene_type | " |
| Dt_chr8 | Cufflinks | exon | 36776655 | 36776714 | . | - | . | gene_id | "XLOC_221892"; | transcript_id | "Novel_003105"; | exon_number | "2"; | gene_type | " |
| Dt_chr8 | Cufflinks | exon | 36777095 | 36777246 | . | - | . | gene_id | "XLOC_221892"; | transcript_id | "Novel_003105"; | exon_number | "3"; | gene_type | " |
| Dt_chr8 | Cufflinks | exon | 38685776 | 38686112 | . | - | . | gene_id | "XLOC_222103"; | transcript_id | "Novel_003106"; | exon_number | "1"; | gene_type | " |
| Dt_chr8 | Cufflinks | exon | 38686293 | 38686454 | . | - | . | gene_id | "XLOC_222103"; | transcript_id | "Novel_003106"; | exon_number | "2"; | gene_type | " |
| Dt_chr8 | Cufflinks | exon | 38686876 | 38686915 | . | - | . | gene_id | "XLOC_222103"; | transcript_id | "Novel_003106"; | exon_number | "3"; | gene_type | " |
| Dt_chr8 | Cufflinks | exon | 38687329 | 38687406 | . | - | . | gene_id | "XLOC_222103"; | transcript_id | "Novel_003106"; | exon_number | "4"; | gene_type | " |
| Dt_chr8 | Cufflinks | exon | 38687545 | 38687643 | . | - | . | gene_id | "XLOC_222103"; | transcript_id | "Novel_003106"; | exon_number | "5"; | gene_type | " |
| Dt_chr8 | Cufflinks | exon | 38687774 | 38687815 | . | - | . | gene_id | "XLOC_222103"; | transcript_id | "Novel_003106"; | exon_number | "6"; | gene_type | " |
| Dt_chr8 | Cufflinks | exon | 38687997 | 38688045 | . | - | . | gene_id | "XLOC_222103"; | transcript_id | "Novel_003106"; | exon_number | "7"; | gene_type | " |

|         |           |      |          |          |   |   |   |         |                |               |                 |             |      |           |   |
|---------|-----------|------|----------|----------|---|---|---|---------|----------------|---------------|-----------------|-------------|------|-----------|---|
| Dt_chr8 | Cufflinks | exon | 38688203 | 38688322 | . | - | . | gene_id | "XLOC_222103"; | transcript_id | "Novel_003106"; | exon_number | "8"; | gene_type | " |
| Dt_chr8 | Cufflinks | exon | 38685779 | 38686112 | . | - | . | gene_id | "XLOC_222103"; | transcript_id | "Novel_003107"; | exon_number | "1"; | gene_type | " |
| Dt_chr8 | Cufflinks | exon | 38686293 | 38686454 | . | - | . | gene_id | "XLOC_222103"; | transcript_id | "Novel_003107"; | exon_number | "2"; | gene_type | " |
| Dt_chr8 | Cufflinks | exon | 38686876 | 38686915 | . | - | . | gene_id | "XLOC_222103"; | transcript_id | "Novel_003107"; | exon_number | "3"; | gene_type | " |
| Dt_chr8 | Cufflinks | exon | 38687329 | 38687406 | . | - | . | gene_id | "XLOC_222103"; | transcript_id | "Novel_003107"; | exon_number | "4"; | gene_type | " |
| Dt_chr8 | Cufflinks | exon | 38687545 | 38687643 | . | - | . | gene_id | "XLOC_222103"; | transcript_id | "Novel_003107"; | exon_number | "5"; | gene_type | " |
| Dt_chr8 | Cufflinks | exon | 38687774 | 38687815 | . | - | . | gene_id | "XLOC_222103"; | transcript_id | "Novel_003107"; | exon_number | "6"; | gene_type | " |
| Dt_chr8 | Cufflinks | exon | 38687997 | 38688045 | . | - | . | gene_id | "XLOC_222103"; | transcript_id | "Novel_003107"; | exon_number | "7"; | gene_type | " |
| Dt_chr8 | Cufflinks | exon | 38688276 | 38688395 | . | - | . | gene_id | "XLOC_222103"; | transcript_id | "Novel_003107"; | exon_number | "8"; | gene_type | " |
| Dt_chr8 | Cufflinks | exon | 38685859 | 38686112 | . | - | . | gene_id | "XLOC_222103"; | transcript_id | "Novel_003108"; | exon_number | "1"; | gene_type | " |
| Dt_chr8 | Cufflinks | exon | 38686293 | 38686454 | . | - | . | gene_id | "XLOC_222103"; | transcript_id | "Novel_003108"; | exon_number | "2"; | gene_type | " |
| Dt_chr8 | Cufflinks | exon | 38686876 | 38686915 | . | - | . | gene_id | "XLOC_222103"; | transcript_id | "Novel_003108"; | exon_number | "3"; | gene_type | " |
| Dt_chr8 | Cufflinks | exon | 38687329 | 38687406 | . | - | . | gene_id | "XLOC_222103"; | transcript_id | "Novel_003108"; | exon_number | "4"; | gene_type | " |
| Dt_chr8 | Cufflinks | exon | 38687545 | 38687645 | . | - | . | gene_id | "XLOC_222103"; | transcript_id | "Novel_003108"; | exon_number | "5"; | gene_type | " |
| Dt_chr8 | Cufflinks | exon | 39185625 | 39185869 | . | - | . | gene_id | "XLOC_222196"; | transcript_id | "Novel_003109"; | exon_number | "1"; | gene_type | " |
| Dt_chr8 | Cufflinks | exon | 39186336 | 39186413 | . | - | . | gene_id | "XLOC_222196"; | transcript_id | "Novel_003109"; | exon_number | "2"; | gene_type | " |
| Dt_chr8 | Cufflinks | exon | 39187504 | 39187774 | . | - | . | gene_id | "XLOC_222196"; | transcript_id | "Novel_003109"; | exon_number | "3"; | gene_type | " |
| Dt_chr8 | Cufflinks | exon | 40190358 | 40190693 | . | - | . | gene_id | "XLOC_222330"; | transcript_id | "Novel_003110"; | exon_number | "1"; | gene_type | " |
| Dt_chr8 | Cufflinks | exon | 40191188 | 40191248 | . | - | . | gene_id | "XLOC_222330"; | transcript_id | "Novel_003110"; | exon_number | "2"; | gene_type | " |
| Dt_chr8 | Cufflinks | exon | 43469609 | 43469727 | . | - | . | gene_id | "XLOC_222706"; | transcript_id | "Novel_003111"; | exon_number | "1"; | gene_type | " |
| Dt_chr8 | Cufflinks | exon | 43470397 | 43470498 | . | - | . | gene_id | "XLOC_222706"; | transcript_id | "Novel_003111"; | exon_number | "2"; | gene_type | " |
| Dt_chr8 | Cufflinks | exon | 43470629 | 43470676 | . | - | . | gene_id | "XLOC_222706"; | transcript_id | "Novel_003111"; | exon_number | "3"; | gene_type | " |
| Dt_chr8 | Cufflinks | exon | 44899279 | 44899295 | . | - | . | gene_id | "XLOC_222903"; | transcript_id | "Novel_003112"; | exon_number | "1"; | gene_type | " |
| Dt_chr8 | Cufflinks | exon | 44899409 | 44899520 | . | - | . | gene_id | "XLOC_222903"; | transcript_id | "Novel_003112"; | exon_number | "2"; | gene_type | " |
| Dt_chr8 | Cufflinks | exon | 44899699 | 44899894 | . | - | . | gene_id | "XLOC_222903"; | transcript_id | "Novel_003112"; | exon_number | "3"; | gene_type | " |
| Dt_chr8 | Cufflinks | exon | 45394866 | 45395684 | . | - | . | gene_id | "XLOC_222962"; | transcript_id | "Novel_003113"; | exon_number | "1"; | gene_type | " |
| Dt_chr8 | Cufflinks | exon | 45395765 | 45396196 | . | - | . | gene_id | "XLOC_222962"; | transcript_id | "Novel_003113"; | exon_number | "2"; | gene_type | " |
| Dt_chr8 | Cufflinks | exon | 46729993 | 46730313 | . | - | . | gene_id | "XLOC_223135"; | transcript_id | "Novel_003114"; | exon_number | "1"; | gene_type | " |
| Dt_chr8 | Cufflinks | exon | 46730649 | 46730709 | . | - | . | gene_id | "XLOC_223135"; | transcript_id | "Novel_003114"; | exon_number | "2"; | gene_type | " |
| Dt_chr8 | Cufflinks | exon | 46731698 | 46731716 | . | - | . | gene_id | "XLOC_223135"; | transcript_id | "Novel_003114"; | exon_number | "3"; | gene_type | " |
| Dt_chr8 | Cufflinks | exon | 46732345 | 46732506 | . | - | . | gene_id | "XLOC_223135"; | transcript_id | "Novel_003114"; | exon_number | "4"; | gene_type | " |
| Dt_chr8 | Cufflinks | exon | 46732573 | 46732851 | . | - | . | gene_id | "XLOC_223135"; | transcript_id | "Novel_003114"; | exon_number | "5"; | gene_type | " |
| Dt_chr8 | Cufflinks | exon | 46729993 | 46730313 | . | - | . | gene_id | "XLOC_223135"; | transcript_id | "Novel_003115"; | exon_number | "1"; | gene_type | " |
| Dt_chr8 | Cufflinks | exon | 46730649 | 46730709 | . | - | . | gene_id | "XLOC_223135"; | transcript_id | "Novel_003115"; | exon_number | "2"; | gene_type | " |
| Dt_chr8 | Cufflinks | exon | 46731698 | 46731716 | . | - | . | gene_id | "XLOC_223135"; | transcript_id | "Novel_003115"; | exon_number | "3"; | gene_type | " |

|         |           |      |          |          |   |   |   |         |                |               |                 |             |       |           |   |
|---------|-----------|------|----------|----------|---|---|---|---------|----------------|---------------|-----------------|-------------|-------|-----------|---|
| Dt_chr8 | Cufflinks | exon | 46732345 | 46732484 | . | - | . | gene_id | "XLOC_223135"; | transcript_id | "Novel_003115"; | exon_number | "4";  | gene_type | " |
| Dt_chr8 | Cufflinks | exon | 46732573 | 46732851 | . | - | . | gene_id | "XLOC_223135"; | transcript_id | "Novel_003115"; | exon_number | "5";  | gene_type | " |
| Dt_chr8 | Cufflinks | exon | 46879417 | 46879670 | . | - | . | gene_id | "XLOC_223153"; | transcript_id | "Novel_003116"; | exon_number | "1";  | gene_type | " |
| Dt_chr8 | Cufflinks | exon | 47081337 | 47082109 | . | - | . | gene_id | "XLOC_223188"; | transcript_id | "Novel_003117"; | exon_number | "1";  | gene_type | " |
| Dt_chr8 | Cufflinks | exon | 47082657 | 47082788 | . | - | . | gene_id | "XLOC_223188"; | transcript_id | "Novel_003117"; | exon_number | "2";  | gene_type | " |
| Dt_chr8 | Cufflinks | exon | 47082946 | 47083095 | . | - | . | gene_id | "XLOC_223188"; | transcript_id | "Novel_003117"; | exon_number | "3";  | gene_type | " |
| Dt_chr8 | Cufflinks | exon | 47083602 | 47083757 | . | - | . | gene_id | "XLOC_223188"; | transcript_id | "Novel_003117"; | exon_number | "4";  | gene_type | " |
| Dt_chr8 | Cufflinks | exon | 47084049 | 47084172 | . | - | . | gene_id | "XLOC_223188"; | transcript_id | "Novel_003118"; | exon_number | "1";  | gene_type | " |
| Dt_chr8 | Cufflinks | exon | 47084396 | 47084491 | . | - | . | gene_id | "XLOC_223188"; | transcript_id | "Novel_003118"; | exon_number | "2";  | gene_type | " |
| Dt_chr8 | Cufflinks | exon | 47084672 | 47084712 | . | - | . | gene_id | "XLOC_223188"; | transcript_id | "Novel_003118"; | exon_number | "3";  | gene_type | " |
| Dt_chr8 | Cufflinks | exon | 47344044 | 47344517 | . | - | . | gene_id | "XLOC_223231"; | transcript_id | "Novel_003119"; | exon_number | "1";  | gene_type | " |
| Dt_chr8 | Cufflinks | exon | 47344586 | 47344640 | . | - | . | gene_id | "XLOC_223231"; | transcript_id | "Novel_003119"; | exon_number | "2";  | gene_type | " |
| Dt_chr8 | Cufflinks | exon | 47344761 | 47344864 | . | - | . | gene_id | "XLOC_223231"; | transcript_id | "Novel_003119"; | exon_number | "3";  | gene_type | " |
| Dt_chr8 | Cufflinks | exon | 47346415 | 47346734 | . | - | . | gene_id | "XLOC_223231"; | transcript_id | "Novel_003119"; | exon_number | "4";  | gene_type | " |
| Dt_chr8 | Cufflinks | exon | 47609114 | 47609211 | . | - | . | gene_id | "XLOC_223270"; | transcript_id | "Novel_003120"; | exon_number | "1";  | gene_type | " |
| Dt_chr8 | Cufflinks | exon | 47609527 | 47609772 | . | - | . | gene_id | "XLOC_223270"; | transcript_id | "Novel_003120"; | exon_number | "2";  | gene_type | " |
| Dt_chr8 | Cufflinks | exon | 47609861 | 47609933 | . | - | . | gene_id | "XLOC_223270"; | transcript_id | "Novel_003120"; | exon_number | "3";  | gene_type | " |
| Dt_chr8 | Cufflinks | exon | 47610378 | 47610445 | . | - | . | gene_id | "XLOC_223270"; | transcript_id | "Novel_003120"; | exon_number | "4";  | gene_type | " |
| Dt_chr8 | Cufflinks | exon | 47610568 | 47610655 | . | - | . | gene_id | "XLOC_223270"; | transcript_id | "Novel_003120"; | exon_number | "5";  | gene_type | " |
| Dt_chr8 | Cufflinks | exon | 47611414 | 47611488 | . | - | . | gene_id | "XLOC_223270"; | transcript_id | "Novel_003120"; | exon_number | "6";  | gene_type | " |
| Dt_chr8 | Cufflinks | exon | 47611626 | 47611665 | . | - | . | gene_id | "XLOC_223270"; | transcript_id | "Novel_003120"; | exon_number | "7";  | gene_type | " |
| Dt_chr8 | Cufflinks | exon | 47611802 | 47611898 | . | - | . | gene_id | "XLOC_223270"; | transcript_id | "Novel_003120"; | exon_number | "8";  | gene_type | " |
| Dt_chr8 | Cufflinks | exon | 47612270 | 47612377 | . | - | . | gene_id | "XLOC_223270"; | transcript_id | "Novel_003120"; | exon_number | "9";  | gene_type | " |
| Dt_chr8 | Cufflinks | exon | 47612596 | 47612691 | . | - | . | gene_id | "XLOC_223270"; | transcript_id | "Novel_003120"; | exon_number | "10"; | gene_type | " |
| Dt_chr8 | Cufflinks | exon | 47612812 | 47612970 | . | - | . | gene_id | "XLOC_223270"; | transcript_id | "Novel_003120"; | exon_number | "11"; | gene_type | " |
| Dt_chr8 | Cufflinks | exon | 47609168 | 47609772 | . | - | . | gene_id | "XLOC_223270"; | transcript_id | "Novel_003121"; | exon_number | "1";  | gene_type | " |
| Dt_chr8 | Cufflinks | exon | 47609861 | 47609933 | . | - | . | gene_id | "XLOC_223270"; | transcript_id | "Novel_003121"; | exon_number | "2";  | gene_type | " |
| Dt_chr8 | Cufflinks | exon | 47610378 | 47610445 | . | - | . | gene_id | "XLOC_223270"; | transcript_id | "Novel_003121"; | exon_number | "3";  | gene_type | " |
| Dt_chr8 | Cufflinks | exon | 47610568 | 47610655 | . | - | . | gene_id | "XLOC_223270"; | transcript_id | "Novel_003121"; | exon_number | "4";  | gene_type | " |
| Dt_chr8 | Cufflinks | exon | 47611414 | 47611488 | . | - | . | gene_id | "XLOC_223270"; | transcript_id | "Novel_003121"; | exon_number | "5";  | gene_type | " |
| Dt_chr8 | Cufflinks | exon | 47611626 | 47611665 | . | - | . | gene_id | "XLOC_223270"; | transcript_id | "Novel_003121"; | exon_number | "6";  | gene_type | " |
| Dt_chr8 | Cufflinks | exon | 47611802 | 47611898 | . | - | . | gene_id | "XLOC_223270"; | transcript_id | "Novel_003121"; | exon_number | "7";  | gene_type | " |
| Dt_chr8 | Cufflinks | exon | 47612270 | 47612377 | . | - | . | gene_id | "XLOC_223270"; | transcript_id | "Novel_003121"; | exon_number | "8";  | gene_type | " |
| Dt_chr8 | Cufflinks | exon | 47612596 | 47612691 | . | - | . | gene_id | "XLOC_223270"; | transcript_id | "Novel_003121"; | exon_number | "9";  | gene_type | " |
| Dt_chr8 | Cufflinks | exon | 47612812 | 47613016 | . | - | . | gene_id | "XLOC_223270"; | transcript_id | "Novel_003121"; | exon_number | "10"; | gene_type | " |

|         |           |      |          |          |   |   |   |         |                |               |                 |             |      |           |   |
|---------|-----------|------|----------|----------|---|---|---|---------|----------------|---------------|-----------------|-------------|------|-----------|---|
| Dt_chr8 | Cufflinks | exon | 47730884 | 47731221 | . | - | . | gene_id | "XLOC_223286"; | transcript_id | "Novel_003122"; | exon_number | "1"; | gene_type | " |
| Dt_chr8 | Cufflinks | exon | 47731840 | 47731905 | . | - | . | gene_id | "XLOC_223286"; | transcript_id | "Novel_003122"; | exon_number | "2"; | gene_type | " |
| Dt_chr8 | Cufflinks | exon | 48530206 | 48532602 | . | - | . | gene_id | "XLOC_223364"; | transcript_id | "Novel_003123"; | exon_number | "1"; | gene_type | " |
| Dt_chr8 | Cufflinks | exon | 50581467 | 50582606 | . | - | . | gene_id | "XLOC_223695"; | transcript_id | "Novel_003124"; | exon_number | "1"; | gene_type | " |
| Dt_chr8 | Cufflinks | exon | 50582687 | 50582853 | . | - | . | gene_id | "XLOC_223695"; | transcript_id | "Novel_003124"; | exon_number | "2"; | gene_type | " |
| Dt_chr8 | Cufflinks | exon | 50583956 | 50584792 | . | - | . | gene_id | "XLOC_223695"; | transcript_id | "Novel_003124"; | exon_number | "3"; | gene_type | " |
| Dt_chr8 | Cufflinks | exon | 50585902 | 50586405 | . | - | . | gene_id | "XLOC_223697"; | transcript_id | "Novel_003125"; | exon_number | "1"; | gene_type | " |
| Dt_chr8 | Cufflinks | exon | 50587039 | 50587202 | . | - | . | gene_id | "XLOC_223697"; | transcript_id | "Novel_003125"; | exon_number | "2"; | gene_type | " |
| Dt_chr8 | Cufflinks | exon | 50587471 | 50587564 | . | - | . | gene_id | "XLOC_223697"; | transcript_id | "Novel_003125"; | exon_number | "3"; | gene_type | " |
| Dt_chr8 | Cufflinks | exon | 50587646 | 50587774 | . | - | . | gene_id | "XLOC_223697"; | transcript_id | "Novel_003125"; | exon_number | "4"; | gene_type | " |
| Dt_chr8 | Cufflinks | exon | 50587846 | 50587933 | . | - | . | gene_id | "XLOC_223697"; | transcript_id | "Novel_003125"; | exon_number | "5"; | gene_type | " |
| Dt_chr8 | Cufflinks | exon | 50588499 | 50588596 | . | - | . | gene_id | "XLOC_223697"; | transcript_id | "Novel_003125"; | exon_number | "6"; | gene_type | " |
| Dt_chr8 | Cufflinks | exon | 50588709 | 50588827 | . | - | . | gene_id | "XLOC_223697"; | transcript_id | "Novel_003125"; | exon_number | "7"; | gene_type | " |
| Dt_chr8 | Cufflinks | exon | 50589197 | 50589306 | . | - | . | gene_id | "XLOC_223697"; | transcript_id | "Novel_003125"; | exon_number | "8"; | gene_type | " |
| Dt_chr8 | Cufflinks | exon | 50589401 | 50589607 | . | - | . | gene_id | "XLOC_223697"; | transcript_id | "Novel_003125"; | exon_number | "9"; | gene_type | " |
| Dt_chr8 | Cufflinks | exon | 50589027 | 50589306 | . | - | . | gene_id | "XLOC_223697"; | transcript_id | "Novel_003126"; | exon_number | "1"; | gene_type | " |
| Dt_chr8 | Cufflinks | exon | 50589401 | 50589611 | . | - | . | gene_id | "XLOC_223697"; | transcript_id | "Novel_003126"; | exon_number | "2"; | gene_type | " |
| Dt_chr8 | Cufflinks | exon | 52001579 | 52002360 | . | - | . | gene_id | "XLOC_223835"; | transcript_id | "Novel_003127"; | exon_number | "1"; | gene_type | " |
| Dt_chr8 | Cufflinks | exon | 52002436 | 52002594 | . | - | . | gene_id | "XLOC_223835"; | transcript_id | "Novel_003127"; | exon_number | "2"; | gene_type | " |
| Dt_chr8 | Cufflinks | exon | 52002700 | 52002798 | . | - | . | gene_id | "XLOC_223835"; | transcript_id | "Novel_003127"; | exon_number | "3"; | gene_type | " |
| Dt_chr8 | Cufflinks | exon | 52002975 | 52003228 | . | - | . | gene_id | "XLOC_223835"; | transcript_id | "Novel_003127"; | exon_number | "4"; | gene_type | " |
| Dt_chr8 | Cufflinks | exon | 52003631 | 52004358 | . | - | . | gene_id | "XLOC_223835"; | transcript_id | "Novel_003127"; | exon_number | "5"; | gene_type | " |
| Dt_chr8 | Cufflinks | exon | 52136042 | 52137565 | . | - | . | gene_id | "XLOC_223857"; | transcript_id | "Novel_003128"; | exon_number | "1"; | gene_type | " |
| Dt_chr8 | Cufflinks | exon | 52140447 | 52140525 | . | - | . | gene_id | "XLOC_223857"; | transcript_id | "Novel_003128"; | exon_number | "2"; | gene_type | " |
| Dt_chr8 | Cufflinks | exon | 52140703 | 52141248 | . | - | . | gene_id | "XLOC_223857"; | transcript_id | "Novel_003128"; | exon_number | "3"; | gene_type | " |
| Dt_chr8 | Cufflinks | exon | 52136152 | 52137565 | . | - | . | gene_id | "XLOC_223857"; | transcript_id | "Novel_003129"; | exon_number | "1"; | gene_type | " |
| Dt_chr8 | Cufflinks | exon | 52140447 | 52140517 | . | - | . | gene_id | "XLOC_223857"; | transcript_id | "Novel_003129"; | exon_number | "2"; | gene_type | " |
| Dt_chr8 | Cufflinks | exon | 52140703 | 52141193 | . | - | . | gene_id | "XLOC_223857"; | transcript_id | "Novel_003129"; | exon_number | "3"; | gene_type | " |
| Dt_chr8 | Cufflinks | exon | 52710862 | 52712522 | . | - | . | gene_id | "XLOC_223970"; | transcript_id | "Novel_003130"; | exon_number | "1"; | gene_type | " |
| Dt_chr8 | Cufflinks | exon | 52718415 | 52718848 | . | - | . | gene_id | "XLOC_223970"; | transcript_id | "Novel_003130"; | exon_number | "2"; | gene_type | " |
| Dt_chr8 | Cufflinks | exon | 53298304 | 53299050 | . | - | . | gene_id | "XLOC_224059"; | transcript_id | "Novel_003131"; | exon_number | "1"; | gene_type | " |
| Dt_chr8 | Cufflinks | exon | 53299860 | 53300075 | . | - | . | gene_id | "XLOC_224059"; | transcript_id | "Novel_003131"; | exon_number | "2"; | gene_type | " |
| Dt_chr8 | Cufflinks | exon | 53300799 | 53301155 | . | - | . | gene_id | "XLOC_224059"; | transcript_id | "Novel_003131"; | exon_number | "3"; | gene_type | " |
| Dt_chr8 | Cufflinks | exon | 53861245 | 53861600 | . | - | . | gene_id | "XLOC_224139"; | transcript_id | "Novel_003132"; | exon_number | "1"; | gene_type | " |
| Dt_chr8 | Cufflinks | exon | 53861697 | 53862171 | . | - | . | gene_id | "XLOC_224139"; | transcript_id | "Novel_003132"; | exon_number | "2"; | gene_type | " |

|         |           |      |          |          |   |   |   |         |                |               |                 |             |       |           |   |
|---------|-----------|------|----------|----------|---|---|---|---------|----------------|---------------|-----------------|-------------|-------|-----------|---|
| Dt_chr8 | Cufflinks | exon | 53882034 | 53882295 | . | - | . | gene_id | "XLOC_224142"; | transcript_id | "Novel_003133"; | exon_number | "1";  | gene_type | " |
| Dt_chr8 | Cufflinks | exon | 53882425 | 53882803 | . | - | . | gene_id | "XLOC_224142"; | transcript_id | "Novel_003133"; | exon_number | "2";  | gene_type | " |
| Dt_chr8 | Cufflinks | exon | 53882923 | 53883414 | . | - | . | gene_id | "XLOC_224142"; | transcript_id | "Novel_003133"; | exon_number | "3";  | gene_type | " |
| Dt_chr8 | Cufflinks | exon | 53978787 | 53979143 | . | - | . | gene_id | "XLOC_224164"; | transcript_id | "Novel_003134"; | exon_number | "1";  | gene_type | " |
| Dt_chr8 | Cufflinks | exon | 53980738 | 53980983 | . | - | . | gene_id | "XLOC_224164"; | transcript_id | "Novel_003134"; | exon_number | "2";  | gene_type | " |
| Dt_chr8 | Cufflinks | exon | 53978787 | 53978920 | . | - | . | gene_id | "XLOC_224164"; | transcript_id | "Novel_003135"; | exon_number | "1";  | gene_type | " |
| Dt_chr8 | Cufflinks | exon | 53979088 | 53979143 | . | - | . | gene_id | "XLOC_224164"; | transcript_id | "Novel_003135"; | exon_number | "2";  | gene_type | " |
| Dt_chr8 | Cufflinks | exon | 53980738 | 53980983 | . | - | . | gene_id | "XLOC_224164"; | transcript_id | "Novel_003135"; | exon_number | "3";  | gene_type | " |
| Dt_chr8 | Cufflinks | exon | 55171355 | 55172557 | . | - | . | gene_id | "XLOC_224322"; | transcript_id | "Novel_003136"; | exon_number | "1";  | gene_type | " |
| Dt_chr8 | Cufflinks | exon | 55172639 | 55172697 | . | - | . | gene_id | "XLOC_224322"; | transcript_id | "Novel_003136"; | exon_number | "2";  | gene_type | " |
| Dt_chr8 | Cufflinks | exon | 55173371 | 55173689 | . | - | . | gene_id | "XLOC_224322"; | transcript_id | "Novel_003136"; | exon_number | "3";  | gene_type | " |
| Dt_chr8 | Cufflinks | exon | 55174045 | 55174383 | . | - | . | gene_id | "XLOC_224322"; | transcript_id | "Novel_003136"; | exon_number | "4";  | gene_type | " |
| Dt_chr8 | Cufflinks | exon | 55651545 | 55651955 | . | - | . | gene_id | "XLOC_224421"; | transcript_id | "Novel_003137"; | exon_number | "1";  | gene_type | " |
| Dt_chr8 | Cufflinks | exon | 55652046 | 55652260 | . | - | . | gene_id | "XLOC_224421"; | transcript_id | "Novel_003137"; | exon_number | "2";  | gene_type | " |
| Dt_chr9 | Cufflinks | exon | 947726   | 947885   | . | + | . | gene_id | "XLOC_224815"; | transcript_id | "Novel_003138"; | exon_number | "1";  | gene_type | " |
| Dt_chr9 | Cufflinks | exon | 948185   | 948238   | . | + | . | gene_id | "XLOC_224815"; | transcript_id | "Novel_003138"; | exon_number | "2";  | gene_type | " |
| Dt_chr9 | Cufflinks | exon | 948912   | 950450   | . | + | . | gene_id | "XLOC_224815"; | transcript_id | "Novel_003138"; | exon_number | "3";  | gene_type | " |
| Dt_chr9 | Cufflinks | exon | 947730   | 947885   | . | + | . | gene_id | "XLOC_224815"; | transcript_id | "Novel_003139"; | exon_number | "1";  | gene_type | " |
| Dt_chr9 | Cufflinks | exon | 948185   | 948238   | . | + | . | gene_id | "XLOC_224815"; | transcript_id | "Novel_003139"; | exon_number | "2";  | gene_type | " |
| Dt_chr9 | Cufflinks | exon | 948912   | 949061   | . | + | . | gene_id | "XLOC_224815"; | transcript_id | "Novel_003139"; | exon_number | "3";  | gene_type | " |
| Dt_chr9 | Cufflinks | exon | 949704   | 949783   | . | + | . | gene_id | "XLOC_224815"; | transcript_id | "Novel_003139"; | exon_number | "4";  | gene_type | " |
| Dt_chr9 | Cufflinks | exon | 1129342  | 1129674  | . | + | . | gene_id | "XLOC_224839"; | transcript_id | "Novel_003140"; | exon_number | "1";  | gene_type | " |
| Dt_chr9 | Cufflinks | exon | 1130291  | 1130412  | . | + | . | gene_id | "XLOC_224839"; | transcript_id | "Novel_003140"; | exon_number | "2";  | gene_type | " |
| Dt_chr9 | Cufflinks | exon | 1130509  | 1130663  | . | + | . | gene_id | "XLOC_224839"; | transcript_id | "Novel_003140"; | exon_number | "3";  | gene_type | " |
| Dt_chr9 | Cufflinks | exon | 1130737  | 1130887  | . | + | . | gene_id | "XLOC_224839"; | transcript_id | "Novel_003140"; | exon_number | "4";  | gene_type | " |
| Dt_chr9 | Cufflinks | exon | 1131257  | 1131291  | . | + | . | gene_id | "XLOC_224839"; | transcript_id | "Novel_003140"; | exon_number | "5";  | gene_type | " |
| Dt_chr9 | Cufflinks | exon | 1131988  | 1132063  | . | + | . | gene_id | "XLOC_224839"; | transcript_id | "Novel_003140"; | exon_number | "6";  | gene_type | " |
| Dt_chr9 | Cufflinks | exon | 1132152  | 1132215  | . | + | . | gene_id | "XLOC_224839"; | transcript_id | "Novel_003140"; | exon_number | "7";  | gene_type | " |
| Dt_chr9 | Cufflinks | exon | 1132369  | 1132559  | . | + | . | gene_id | "XLOC_224839"; | transcript_id | "Novel_003140"; | exon_number | "8";  | gene_type | " |
| Dt_chr9 | Cufflinks | exon | 1133004  | 1133258  | . | + | . | gene_id | "XLOC_224839"; | transcript_id | "Novel_003140"; | exon_number | "9";  | gene_type | " |
| Dt_chr9 | Cufflinks | exon | 1133616  | 1133717  | . | + | . | gene_id | "XLOC_224839"; | transcript_id | "Novel_003140"; | exon_number | "10"; | gene_type | " |
| Dt_chr9 | Cufflinks | exon | 1133859  | 1133892  | . | + | . | gene_id | "XLOC_224839"; | transcript_id | "Novel_003140"; | exon_number | "11"; | gene_type | " |
| Dt_chr9 | Cufflinks | exon | 1129472  | 1129674  | . | + | . | gene_id | "XLOC_224839"; | transcript_id | "Novel_003141"; | exon_number | "1";  | gene_type | " |
| Dt_chr9 | Cufflinks | exon | 1130291  | 1130412  | . | + | . | gene_id | "XLOC_224839"; | transcript_id | "Novel_003141"; | exon_number | "2";  | gene_type | " |
| Dt_chr9 | Cufflinks | exon | 1130509  | 1130663  | . | + | . | gene_id | "XLOC_224839"; | transcript_id | "Novel_003141"; | exon_number | "3";  | gene_type | " |

|         |           |      |          |          |   |   |   |         |                |               |                 |             |       |           |   |
|---------|-----------|------|----------|----------|---|---|---|---------|----------------|---------------|-----------------|-------------|-------|-----------|---|
| Dt_chr9 | Cufflinks | exon | 1130737  | 1130887  | . | + | . | gene_id | "XLOC_224839"; | transcript_id | "Novel_003141"; | exon_number | "4";  | gene_type | " |
| Dt_chr9 | Cufflinks | exon | 1131257  | 1131291  | . | + | . | gene_id | "XLOC_224839"; | transcript_id | "Novel_003141"; | exon_number | "5";  | gene_type | " |
| Dt_chr9 | Cufflinks | exon | 1131988  | 1132063  | . | + | . | gene_id | "XLOC_224839"; | transcript_id | "Novel_003141"; | exon_number | "6";  | gene_type | " |
| Dt_chr9 | Cufflinks | exon | 1132152  | 1132215  | . | + | . | gene_id | "XLOC_224839"; | transcript_id | "Novel_003141"; | exon_number | "7";  | gene_type | " |
| Dt_chr9 | Cufflinks | exon | 1132369  | 1132559  | . | + | . | gene_id | "XLOC_224839"; | transcript_id | "Novel_003141"; | exon_number | "8";  | gene_type | " |
| Dt_chr9 | Cufflinks | exon | 1133004  | 1133258  | . | + | . | gene_id | "XLOC_224839"; | transcript_id | "Novel_003141"; | exon_number | "9";  | gene_type | " |
| Dt_chr9 | Cufflinks | exon | 1133616  | 1133769  | . | + | . | gene_id | "XLOC_224839"; | transcript_id | "Novel_003141"; | exon_number | "10"; | gene_type | " |
| Dt_chr9 | Cufflinks | exon | 1130337  | 1130412  | . | + | . | gene_id | "XLOC_224839"; | transcript_id | "Novel_003142"; | exon_number | "1";  | gene_type | " |
| Dt_chr9 | Cufflinks | exon | 1130509  | 1130663  | . | + | . | gene_id | "XLOC_224839"; | transcript_id | "Novel_003142"; | exon_number | "2";  | gene_type | " |
| Dt_chr9 | Cufflinks | exon | 1130737  | 1131751  | . | + | . | gene_id | "XLOC_224839"; | transcript_id | "Novel_003142"; | exon_number | "3";  | gene_type | " |
| Dt_chr9 | Cufflinks | exon | 1248035  | 1249169  | . | + | . | gene_id | "XLOC_224855"; | transcript_id | "Novel_003143"; | exon_number | "1";  | gene_type | " |
| Dt_chr9 | Cufflinks | exon | 1249274  | 1249320  | . | + | . | gene_id | "XLOC_224855"; | transcript_id | "Novel_003143"; | exon_number | "2";  | gene_type | " |
| Dt_chr9 | Cufflinks | exon | 2904413  | 2904459  | . | + | . | gene_id | "XLOC_225025"; | transcript_id | "Novel_003144"; | exon_number | "1";  | gene_type | " |
| Dt_chr9 | Cufflinks | exon | 2904565  | 2904692  | . | + | . | gene_id | "XLOC_225025"; | transcript_id | "Novel_003144"; | exon_number | "2";  | gene_type | " |
| Dt_chr9 | Cufflinks | exon | 2905896  | 2905943  | . | + | . | gene_id | "XLOC_225025"; | transcript_id | "Novel_003144"; | exon_number | "3";  | gene_type | " |
| Dt_chr9 | Cufflinks | exon | 2906669  | 2907073  | . | + | . | gene_id | "XLOC_225025"; | transcript_id | "Novel_003144"; | exon_number | "4";  | gene_type | " |
| Dt_chr9 | Cufflinks | exon | 2904508  | 2904692  | . | + | . | gene_id | "XLOC_225025"; | transcript_id | "Novel_003145"; | exon_number | "1";  | gene_type | " |
| Dt_chr9 | Cufflinks | exon | 2905896  | 2905943  | . | + | . | gene_id | "XLOC_225025"; | transcript_id | "Novel_003145"; | exon_number | "2";  | gene_type | " |
| Dt_chr9 | Cufflinks | exon | 2906669  | 2907032  | . | + | . | gene_id | "XLOC_225025"; | transcript_id | "Novel_003145"; | exon_number | "3";  | gene_type | " |
| Dt_chr9 | Cufflinks | exon | 2943865  | 2947134  | . | + | . | gene_id | "XLOC_225032"; | transcript_id | "Novel_003146"; | exon_number | "1";  | gene_type | " |
| Dt_chr9 | Cufflinks | exon | 7604631  | 7604858  | . | + | . | gene_id | "XLOC_225380"; | transcript_id | "Novel_003147"; | exon_number | "1";  | gene_type | " |
| Dt_chr9 | Cufflinks | exon | 8279021  | 8279296  | . | + | . | gene_id | "XLOC_225441"; | transcript_id | "Novel_003148"; | exon_number | "1";  | gene_type | " |
| Dt_chr9 | Cufflinks | exon | 8644216  | 8644513  | . | + | . | gene_id | "XLOC_225485"; | transcript_id | "Novel_003149"; | exon_number | "1";  | gene_type | " |
| Dt_chr9 | Cufflinks | exon | 17968861 | 17969207 | . | + | . | gene_id | "XLOC_225990"; | transcript_id | "Novel_003150"; | exon_number | "1";  | gene_type | " |
| Dt_chr9 | Cufflinks | exon | 17969845 | 17969898 | . | + | . | gene_id | "XLOC_225990"; | transcript_id | "Novel_003150"; | exon_number | "2";  | gene_type | " |
| Dt_chr9 | Cufflinks | exon | 17970209 | 17970364 | . | + | . | gene_id | "XLOC_225990"; | transcript_id | "Novel_003150"; | exon_number | "3";  | gene_type | " |
| Dt_chr9 | Cufflinks | exon | 17970772 | 17970817 | . | + | . | gene_id | "XLOC_225990"; | transcript_id | "Novel_003150"; | exon_number | "4";  | gene_type | " |
| Dt_chr9 | Cufflinks | exon | 17971151 | 17971175 | . | + | . | gene_id | "XLOC_225990"; | transcript_id | "Novel_003150"; | exon_number | "5";  | gene_type | " |
| Dt_chr9 | Cufflinks | exon | 23225768 | 23225871 | . | + | . | gene_id | "XLOC_226315"; | transcript_id | "Novel_003151"; | exon_number | "1";  | gene_type | " |
| Dt_chr9 | Cufflinks | exon | 23226190 | 23226295 | . | + | . | gene_id | "XLOC_226315"; | transcript_id | "Novel_003151"; | exon_number | "2";  | gene_type | " |
| Dt_chr9 | Cufflinks | exon | 23226431 | 23226483 | . | + | . | gene_id | "XLOC_226315"; | transcript_id | "Novel_003151"; | exon_number | "3";  | gene_type | " |
| Dt_chr9 | Cufflinks | exon | 23226581 | 23226662 | . | + | . | gene_id | "XLOC_226315"; | transcript_id | "Novel_003151"; | exon_number | "4";  | gene_type | " |
| Dt_chr9 | Cufflinks | exon | 23227208 | 23227273 | . | + | . | gene_id | "XLOC_226315"; | transcript_id | "Novel_003151"; | exon_number | "5";  | gene_type | " |
| Dt_chr9 | Cufflinks | exon | 23227388 | 23227455 | . | + | . | gene_id | "XLOC_226315"; | transcript_id | "Novel_003151"; | exon_number | "6";  | gene_type | " |
| Dt_chr9 | Cufflinks | exon | 23227582 | 23227800 | . | + | . | gene_id | "XLOC_226315"; | transcript_id | "Novel_003151"; | exon_number | "7";  | gene_type | " |

|         |           |      |          |          |   |   |   |         |                |               |                 |             |       |           |   |
|---------|-----------|------|----------|----------|---|---|---|---------|----------------|---------------|-----------------|-------------|-------|-----------|---|
| Dt_chr9 | Cufflinks | exon | 23228013 | 23228505 | . | + | . | gene_id | "XLOC_226315"; | transcript_id | "Novel_003151"; | exon_number | "8";  | gene_type | " |
| Dt_chr9 | Cufflinks | exon | 23229011 | 23229280 | . | + | . | gene_id | "XLOC_226315"; | transcript_id | "Novel_003151"; | exon_number | "9";  | gene_type | " |
| Dt_chr9 | Cufflinks | exon | 23230069 | 23230555 | . | + | . | gene_id | "XLOC_226315"; | transcript_id | "Novel_003151"; | exon_number | "10"; | gene_type | " |
| Dt_chr9 | Cufflinks | exon | 23228566 | 23229280 | . | + | . | gene_id | "XLOC_226315"; | transcript_id | "Novel_003152"; | exon_number | "1";  | gene_type | " |
| Dt_chr9 | Cufflinks | exon | 23230069 | 23230769 | . | + | . | gene_id | "XLOC_226315"; | transcript_id | "Novel_003152"; | exon_number | "2";  | gene_type | " |
| Dt_chr9 | Cufflinks | exon | 23228570 | 23228692 | . | + | . | gene_id | "XLOC_226315"; | transcript_id | "Novel_003153"; | exon_number | "1";  | gene_type | " |
| Dt_chr9 | Cufflinks | exon | 23229011 | 23229280 | . | + | . | gene_id | "XLOC_226315"; | transcript_id | "Novel_003153"; | exon_number | "2";  | gene_type | " |
| Dt_chr9 | Cufflinks | exon | 23230069 | 23230775 | . | + | . | gene_id | "XLOC_226315"; | transcript_id | "Novel_003153"; | exon_number | "3";  | gene_type | " |
| Dt_chr9 | Cufflinks | exon | 24279840 | 24280206 | . | + | . | gene_id | "XLOC_226383"; | transcript_id | "Novel_003154"; | exon_number | "1";  | gene_type | " |
| Dt_chr9 | Cufflinks | exon | 24280414 | 24281803 | . | + | . | gene_id | "XLOC_226383"; | transcript_id | "Novel_003154"; | exon_number | "2";  | gene_type | " |
| Dt_chr9 | Cufflinks | exon | 24279958 | 24281371 | . | + | . | gene_id | "XLOC_226383"; | transcript_id | "Novel_003155"; | exon_number | "1";  | gene_type | " |
| Dt_chr9 | Cufflinks | exon | 24281504 | 24281814 | . | + | . | gene_id | "XLOC_226383"; | transcript_id | "Novel_003155"; | exon_number | "2";  | gene_type | " |
| Dt_chr9 | Cufflinks | exon | 24946790 | 24946996 | . | + | . | gene_id | "XLOC_226402"; | transcript_id | "Novel_003156"; | exon_number | "1";  | gene_type | " |
| Dt_chr9 | Cufflinks | exon | 24963319 | 24963511 | . | + | . | gene_id | "XLOC_226410"; | transcript_id | "Novel_003157"; | exon_number | "1";  | gene_type | " |
| Dt_chr9 | Cufflinks | exon | 24963601 | 24963739 | . | + | . | gene_id | "XLOC_226410"; | transcript_id | "Novel_003157"; | exon_number | "2";  | gene_type | " |
| Dt_chr9 | Cufflinks | exon | 24963922 | 24964109 | . | + | . | gene_id | "XLOC_226410"; | transcript_id | "Novel_003157"; | exon_number | "3";  | gene_type | " |
| Dt_chr9 | Cufflinks | exon | 24964264 | 24964804 | . | + | . | gene_id | "XLOC_226410"; | transcript_id | "Novel_003157"; | exon_number | "4";  | gene_type | " |
| Dt_chr9 | Cufflinks | exon | 24964874 | 24965231 | . | + | . | gene_id | "XLOC_226410"; | transcript_id | "Novel_003157"; | exon_number | "5";  | gene_type | " |
| Dt_chr9 | Cufflinks | exon | 24964267 | 24964540 | . | + | . | gene_id | "XLOC_226410"; | transcript_id | "Novel_003158"; | exon_number | "1";  | gene_type | " |
| Dt_chr9 | Cufflinks | exon | 24964608 | 24965140 | . | + | . | gene_id | "XLOC_226410"; | transcript_id | "Novel_003158"; | exon_number | "2";  | gene_type | " |
| Dt_chr9 | Cufflinks | exon | 24985488 | 24985606 | . | + | . | gene_id | "XLOC_226412"; | transcript_id | "Novel_003159"; | exon_number | "1";  | gene_type | " |
| Dt_chr9 | Cufflinks | exon | 24985800 | 24986359 | . | + | . | gene_id | "XLOC_226412"; | transcript_id | "Novel_003159"; | exon_number | "2";  | gene_type | " |
| Dt_chr9 | Cufflinks | exon | 24986529 | 24986606 | . | + | . | gene_id | "XLOC_226412"; | transcript_id | "Novel_003159"; | exon_number | "3";  | gene_type | " |
| Dt_chr9 | Cufflinks | exon | 24986727 | 24986802 | . | + | . | gene_id | "XLOC_226412"; | transcript_id | "Novel_003159"; | exon_number | "4";  | gene_type | " |
| Dt_chr9 | Cufflinks | exon | 24986903 | 24986925 | . | + | . | gene_id | "XLOC_226412"; | transcript_id | "Novel_003159"; | exon_number | "5";  | gene_type | " |
| Dt_chr9 | Cufflinks | exon | 24987045 | 24987145 | . | + | . | gene_id | "XLOC_226412"; | transcript_id | "Novel_003159"; | exon_number | "6";  | gene_type | " |
| Dt_chr9 | Cufflinks | exon | 24987691 | 24987785 | . | + | . | gene_id | "XLOC_226412"; | transcript_id | "Novel_003159"; | exon_number | "7";  | gene_type | " |
| Dt_chr9 | Cufflinks | exon | 24987996 | 24988064 | . | + | . | gene_id | "XLOC_226412"; | transcript_id | "Novel_003159"; | exon_number | "8";  | gene_type | " |
| Dt_chr9 | Cufflinks | exon | 24993342 | 24993411 | . | + | . | gene_id | "XLOC_226412"; | transcript_id | "Novel_003159"; | exon_number | "9";  | gene_type | " |
| Dt_chr9 | Cufflinks | exon | 24993898 | 24993961 | . | + | . | gene_id | "XLOC_226412"; | transcript_id | "Novel_003159"; | exon_number | "10"; | gene_type | " |
| Dt_chr9 | Cufflinks | exon | 24994052 | 24994092 | . | + | . | gene_id | "XLOC_226412"; | transcript_id | "Novel_003159"; | exon_number | "11"; | gene_type | " |
| Dt_chr9 | Cufflinks | exon | 24994212 | 24994296 | . | + | . | gene_id | "XLOC_226412"; | transcript_id | "Novel_003159"; | exon_number | "12"; | gene_type | " |
| Dt_chr9 | Cufflinks | exon | 24994568 | 24994630 | . | + | . | gene_id | "XLOC_226412"; | transcript_id | "Novel_003159"; | exon_number | "13"; | gene_type | " |
| Dt_chr9 | Cufflinks | exon | 24994765 | 24994823 | . | + | . | gene_id | "XLOC_226412"; | transcript_id | "Novel_003159"; | exon_number | "14"; | gene_type | " |
| Dt_chr9 | Cufflinks | exon | 24995025 | 24995077 | . | + | . | gene_id | "XLOC_226412"; | transcript_id | "Novel_003159"; | exon_number | "15"; | gene_type | " |



|         |           |      |          |          |   |   |   |         |                |               |                 |             |       |           |  |
|---------|-----------|------|----------|----------|---|---|---|---------|----------------|---------------|-----------------|-------------|-------|-----------|--|
| Dt_chr9 | Cufflinks | exon | 24995295 | 24995367 | . | + | . | gene_id | "XLOC_226412"; | transcript_id | "Novel_003159"; | exon_number | "16"; | gene_type |  |
| Dt_chr9 | Cufflinks | exon | 24995763 | 24996607 | . | + | . | gene_id | "XLOC_226412"; | transcript_id | "Novel_003159"; | exon_number | "17"; | gene_type |  |
| Dt_chr9 | Cufflinks | exon | 24985595 | 24986359 | . | + | . | gene_id | "XLOC_226412"; | transcript_id | "Novel_003160"; | exon_number | "1";  | gene_type |  |
| Dt_chr9 | Cufflinks | exon | 24986529 | 24986606 | . | + | . | gene_id | "XLOC_226412"; | transcript_id | "Novel_003160"; | exon_number | "2";  | gene_type |  |
| Dt_chr9 | Cufflinks | exon | 24986727 | 24986802 | . | + | . | gene_id | "XLOC_226412"; | transcript_id | "Novel_003160"; | exon_number | "3";  | gene_type |  |
| Dt_chr9 | Cufflinks | exon | 24986903 | 24986925 | . | + | . | gene_id | "XLOC_226412"; | transcript_id | "Novel_003160"; | exon_number | "4";  | gene_type |  |
| Dt_chr9 | Cufflinks | exon | 24987045 | 24987145 | . | + | . | gene_id | "XLOC_226412"; | transcript_id | "Novel_003160"; | exon_number | "5";  | gene_type |  |
| Dt_chr9 | Cufflinks | exon | 24987691 | 24987785 | . | + | . | gene_id | "XLOC_226412"; | transcript_id | "Novel_003160"; | exon_number | "6";  | gene_type |  |
| Dt_chr9 | Cufflinks | exon | 24987996 | 24988064 | . | + | . | gene_id | "XLOC_226412"; | transcript_id | "Novel_003160"; | exon_number | "7";  | gene_type |  |
| Dt_chr9 | Cufflinks | exon | 24993342 | 24993411 | . | + | . | gene_id | "XLOC_226412"; | transcript_id | "Novel_003160"; | exon_number | "8";  | gene_type |  |
| Dt_chr9 | Cufflinks | exon | 24993898 | 24993961 | . | + | . | gene_id | "XLOC_226412"; | transcript_id | "Novel_003160"; | exon_number | "9";  | gene_type |  |
| Dt_chr9 | Cufflinks | exon | 24994052 | 24994092 | . | + | . | gene_id | "XLOC_226412"; | transcript_id | "Novel_003160"; | exon_number | "10"; | gene_type |  |
| Dt_chr9 | Cufflinks | exon | 24994212 | 24994296 | . | + | . | gene_id | "XLOC_226412"; | transcript_id | "Novel_003160"; | exon_number | "11"; | gene_type |  |
| Dt_chr9 | Cufflinks | exon | 24994568 | 24994630 | . | + | . | gene_id | "XLOC_226412"; | transcript_id | "Novel_003160"; | exon_number | "12"; | gene_type |  |
| Dt_chr9 | Cufflinks | exon | 24994765 | 24994823 | . | + | . | gene_id | "XLOC_226412"; | transcript_id | "Novel_003160"; | exon_number | "13"; | gene_type |  |
| Dt_chr9 | Cufflinks | exon | 24995025 | 24995077 | . | + | . | gene_id | "XLOC_226412"; | transcript_id | "Novel_003160"; | exon_number | "14"; | gene_type |  |
| Dt_chr9 | Cufflinks | exon | 24995295 | 24995367 | . | + | . | gene_id | "XLOC_226412"; | transcript_id | "Novel_003160"; | exon_number | "15"; | gene_type |  |
| Dt_chr9 | Cufflinks | exon | 24995763 | 24996607 | . | + | . | gene_id | "XLOC_226412"; | transcript_id | "Novel_003160"; | exon_number | "16"; | gene_type |  |
| Dt_chr9 | Cufflinks | exon | 25062838 | 25063033 | . | + | . | gene_id | "XLOC_226417"; | transcript_id | "Novel_003161"; | exon_number | "1";  | gene_type |  |
| Dt_chr9 | Cufflinks | exon | 25063113 | 25063189 | . | + | . | gene_id | "XLOC_226417"; | transcript_id | "Novel_003161"; | exon_number | "2";  | gene_type |  |
| Dt_chr9 | Cufflinks | exon | 25081072 | 25081463 | . | + | . | gene_id | "XLOC_226419"; | transcript_id | "Novel_003162"; | exon_number | "1";  | gene_type |  |
| Dt_chr9 | Cufflinks | exon | 25081670 | 25081754 | . | + | . | gene_id | "XLOC_226419"; | transcript_id | "Novel_003162"; | exon_number | "2";  | gene_type |  |
| Dt_chr9 | Cufflinks | exon | 25082252 | 25082547 | . | + | . | gene_id | "XLOC_226419"; | transcript_id | "Novel_003162"; | exon_number | "3";  | gene_type |  |
| Dt_chr9 | Cufflinks | exon | 25082862 | 25084217 | . | + | . | gene_id | "XLOC_226419"; | transcript_id | "Novel_003162"; | exon_number | "4";  | gene_type |  |
| Dt_chr9 | Cufflinks | exon | 25081072 | 25081463 | . | + | . | gene_id | "XLOC_226419"; | transcript_id | "Novel_003163"; | exon_number | "1";  | gene_type |  |
| Dt_chr9 | Cufflinks | exon | 25081670 | 25081754 | . | + | . | gene_id | "XLOC_226419"; | transcript_id | "Novel_003163"; | exon_number | "2";  | gene_type |  |
| Dt_chr9 | Cufflinks | exon | 25082252 | 25083247 | . | + | . | gene_id | "XLOC_226419"; | transcript_id | "Novel_003163"; | exon_number | "3";  | gene_type |  |
| Dt_chr9 | Cufflinks | exon | 25083515 | 25083641 | . | + | . | gene_id | "XLOC_226419"; | transcript_id | "Novel_003163"; | exon_number | "4";  | gene_type |  |
| Dt_chr9 | Cufflinks | exon | 25083755 | 25084217 | . | + | . | gene_id | "XLOC_226419"; | transcript_id | "Novel_003163"; | exon_number | "5";  | gene_type |  |
| Dt_chr9 | Cufflinks | exon | 25364029 | 25364131 | . | + | . | gene_id | "XLOC_226445"; | transcript_id | "Novel_003164"; | exon_number | "1";  | gene_type |  |
| Dt_chr9 | Cufflinks | exon | 25364522 | 25366770 | . | + | . | gene_id | "XLOC_226445"; | transcript_id | "Novel_003164"; | exon_number | "2";  | gene_type |  |
| Dt_chr9 | Cufflinks | exon | 25520024 | 25520135 | . | + | . | gene_id | "XLOC_226454"; | transcript_id | "Novel_003165"; | exon_number | "1";  | gene_type |  |
| Dt_chr9 | Cufflinks | exon | 25520218 | 25520883 | . | + | . | gene_id | "XLOC_226454"; | transcript_id | "Novel_003165"; | exon_number | "2";  | gene_type |  |
| Dt_chr9 | Cufflinks | exon | 25521938 | 25522058 | . | + | . | gene_id | "XLOC_226454"; | transcript_id | "Novel_003165"; | exon_number | "3";  | gene_type |  |
| Dt_chr9 | Cufflinks | exon | 25522150 | 25522408 | . | + | . | gene_id | "XLOC_226454"; | transcript_id | "Novel_003165"; | exon_number | "4";  | gene_type |  |

|         |           |      |          |          |   |   |   |         |                |               |                 |             |      |           |   |
|---------|-----------|------|----------|----------|---|---|---|---------|----------------|---------------|-----------------|-------------|------|-----------|---|
| Dt_chr9 | Cufflinks | exon | 25522503 | 25522549 | . | + | . | gene_id | "XLOC_226454"; | transcript_id | "Novel_003165"; | exon_number | "5"; | gene_type | " |
| Dt_chr9 | Cufflinks | exon | 25522496 | 25523081 | . | + | . | gene_id | "XLOC_226454"; | transcript_id | "Novel_003166"; | exon_number | "1"; | gene_type | " |
| Dt_chr9 | Cufflinks | exon | 25523191 | 25524454 | . | + | . | gene_id | "XLOC_226454"; | transcript_id | "Novel_003166"; | exon_number | "2"; | gene_type | " |
| Dt_chr9 | Cufflinks | exon | 25522671 | 25523324 | . | + | . | gene_id | "XLOC_226454"; | transcript_id | "Novel_003167"; | exon_number | "1"; | gene_type | " |
| Dt_chr9 | Cufflinks | exon | 25524018 | 25524488 | . | + | . | gene_id | "XLOC_226454"; | transcript_id | "Novel_003167"; | exon_number | "2"; | gene_type | " |
| Dt_chr9 | Cufflinks | exon | 28297982 | 28298014 | . | + | . | gene_id | "XLOC_226637"; | transcript_id | "Novel_003168"; | exon_number | "1"; | gene_type | " |
| Dt_chr9 | Cufflinks | exon | 28298103 | 28301234 | . | + | . | gene_id | "XLOC_226637"; | transcript_id | "Novel_003168"; | exon_number | "2"; | gene_type | " |
| Dt_chr9 | Cufflinks | exon | 30605427 | 30605721 | . | + | . | gene_id | "XLOC_226817"; | transcript_id | "Novel_003169"; | exon_number | "1"; | gene_type | " |
| Dt_chr9 | Cufflinks | exon | 30605814 | 30605903 | . | + | . | gene_id | "XLOC_226817"; | transcript_id | "Novel_003169"; | exon_number | "2"; | gene_type | " |
| Dt_chr9 | Cufflinks | exon | 30608055 | 30608344 | . | + | . | gene_id | "XLOC_226817"; | transcript_id | "Novel_003169"; | exon_number | "3"; | gene_type | " |
| Dt_chr9 | Cufflinks | exon | 31414806 | 31415060 | . | + | . | gene_id | "XLOC_226854"; | transcript_id | "Novel_003170"; | exon_number | "1"; | gene_type | " |
| Dt_chr9 | Cufflinks | exon | 31415593 | 31417766 | . | + | . | gene_id | "XLOC_226854"; | transcript_id | "Novel_003170"; | exon_number | "2"; | gene_type | " |
| Dt_chr9 | Cufflinks | exon | 36488703 | 36488743 | . | + | . | gene_id | "XLOC_227423"; | transcript_id | "Novel_003171"; | exon_number | "1"; | gene_type | " |
| Dt_chr9 | Cufflinks | exon | 36488835 | 36488883 | . | + | . | gene_id | "XLOC_227423"; | transcript_id | "Novel_003171"; | exon_number | "2"; | gene_type | " |
| Dt_chr9 | Cufflinks | exon | 36489570 | 36489654 | . | + | . | gene_id | "XLOC_227423"; | transcript_id | "Novel_003171"; | exon_number | "3"; | gene_type | " |
| Dt_chr9 | Cufflinks | exon | 36490175 | 36490231 | . | + | . | gene_id | "XLOC_227423"; | transcript_id | "Novel_003171"; | exon_number | "4"; | gene_type | " |
| Dt_chr9 | Cufflinks | exon | 36490465 | 36490765 | . | + | . | gene_id | "XLOC_227423"; | transcript_id | "Novel_003171"; | exon_number | "5"; | gene_type | " |
| Dt_chr9 | Cufflinks | exon | 37370638 | 37371629 | . | + | . | gene_id | "XLOC_227551"; | transcript_id | "Novel_003172"; | exon_number | "1"; | gene_type | " |
| Dt_chr9 | Cufflinks | exon | 37371707 | 37372288 | . | + | . | gene_id | "XLOC_227551"; | transcript_id | "Novel_003172"; | exon_number | "2"; | gene_type | " |
| Dt_chr9 | Cufflinks | exon | 39400013 | 39400484 | . | + | . | gene_id | "XLOC_227749"; | transcript_id | "Novel_003173"; | exon_number | "1"; | gene_type | " |
| Dt_chr9 | Cufflinks | exon | 39400732 | 39401613 | . | + | . | gene_id | "XLOC_227749"; | transcript_id | "Novel_003173"; | exon_number | "2"; | gene_type | " |
| Dt_chr9 | Cufflinks | exon | 41178912 | 41179000 | . | + | . | gene_id | "XLOC_227993"; | transcript_id | "Novel_003174"; | exon_number | "1"; | gene_type | " |
| Dt_chr9 | Cufflinks | exon | 41179455 | 41179568 | . | + | . | gene_id | "XLOC_227993"; | transcript_id | "Novel_003174"; | exon_number | "2"; | gene_type | " |
| Dt_chr9 | Cufflinks | exon | 41181210 | 41181818 | . | + | . | gene_id | "XLOC_227993"; | transcript_id | "Novel_003174"; | exon_number | "3"; | gene_type | " |
| Dt_chr9 | Cufflinks | exon | 41179345 | 41179568 | . | + | . | gene_id | "XLOC_227993"; | transcript_id | "Novel_003175"; | exon_number | "1"; | gene_type | " |
| Dt_chr9 | Cufflinks | exon | 41181210 | 41181818 | . | + | . | gene_id | "XLOC_227993"; | transcript_id | "Novel_003175"; | exon_number | "2"; | gene_type | " |
| Dt_chr9 | Cufflinks | exon | 41180260 | 41180511 | . | + | . | gene_id | "XLOC_227993"; | transcript_id | "Novel_003176"; | exon_number | "1"; | gene_type | " |
| Dt_chr9 | Cufflinks | exon | 41181210 | 41181724 | . | + | . | gene_id | "XLOC_227993"; | transcript_id | "Novel_003176"; | exon_number | "2"; | gene_type | " |
| Dt_chr9 | Cufflinks | exon | 41198220 | 41198767 | . | + | . | gene_id | "XLOC_228003"; | transcript_id | "Novel_003177"; | exon_number | "1"; | gene_type | " |
| Dt_chr9 | Cufflinks | exon | 41199594 | 41199980 | . | + | . | gene_id | "XLOC_228003"; | transcript_id | "Novel_003177"; | exon_number | "2"; | gene_type | " |
| Dt_chr9 | Cufflinks | exon | 41200058 | 41200619 | . | + | . | gene_id | "XLOC_228003"; | transcript_id | "Novel_003177"; | exon_number | "3"; | gene_type | " |
| Dt_chr9 | Cufflinks | exon | 41443957 | 41444086 | . | + | . | gene_id | "XLOC_228057"; | transcript_id | "Novel_003178"; | exon_number | "1"; | gene_type | " |
| Dt_chr9 | Cufflinks | exon | 41445187 | 41445270 | . | + | . | gene_id | "XLOC_228057"; | transcript_id | "Novel_003178"; | exon_number | "2"; | gene_type | " |
| Dt_chr9 | Cufflinks | exon | 41445823 | 41445896 | . | + | . | gene_id | "XLOC_228057"; | transcript_id | "Novel_003178"; | exon_number | "3"; | gene_type | " |
| Dt_chr9 | Cufflinks | exon | 41445975 | 41446824 | . | + | . | gene_id | "XLOC_228057"; | transcript_id | "Novel_003178"; | exon_number | "4"; | gene_type | " |

|         |           |      |          |          |   |   |   |         |                |               |                 |             |      |           |   |
|---------|-----------|------|----------|----------|---|---|---|---------|----------------|---------------|-----------------|-------------|------|-----------|---|
| Dt_chr9 | Cufflinks | exon | 41443990 | 41444086 | . | + | . | gene_id | "XLOC_228057"; | transcript_id | "Novel_003179"; | exon_number | "1"; | gene_type | " |
| Dt_chr9 | Cufflinks | exon | 41445178 | 41445270 | . | + | . | gene_id | "XLOC_228057"; | transcript_id | "Novel_003179"; | exon_number | "2"; | gene_type | " |
| Dt_chr9 | Cufflinks | exon | 41445823 | 41445896 | . | + | . | gene_id | "XLOC_228057"; | transcript_id | "Novel_003179"; | exon_number | "3"; | gene_type | " |
| Dt_chr9 | Cufflinks | exon | 41445975 | 41446824 | . | + | . | gene_id | "XLOC_228057"; | transcript_id | "Novel_003179"; | exon_number | "4"; | gene_type | " |
| Dt_chr9 | Cufflinks | exon | 41870534 | 41870630 | . | + | . | gene_id | "XLOC_228124"; | transcript_id | "Novel_003180"; | exon_number | "1"; | gene_type | " |
| Dt_chr9 | Cufflinks | exon | 41870730 | 41870803 | . | + | . | gene_id | "XLOC_228124"; | transcript_id | "Novel_003180"; | exon_number | "2"; | gene_type | " |
| Dt_chr9 | Cufflinks | exon | 41870896 | 41870943 | . | + | . | gene_id | "XLOC_228124"; | transcript_id | "Novel_003180"; | exon_number | "3"; | gene_type | " |
| Dt_chr9 | Cufflinks | exon | 41872085 | 41872306 | . | + | . | gene_id | "XLOC_228124"; | transcript_id | "Novel_003180"; | exon_number | "4"; | gene_type | " |
| Dt_chr9 | Cufflinks | exon | 41872610 | 41873490 | . | + | . | gene_id | "XLOC_228124"; | transcript_id | "Novel_003180"; | exon_number | "5"; | gene_type | " |
| Dt_chr9 | Cufflinks | exon | 41873567 | 41874867 | . | + | . | gene_id | "XLOC_228124"; | transcript_id | "Novel_003180"; | exon_number | "6"; | gene_type | " |
| Dt_chr9 | Cufflinks | exon | 44617528 | 44617793 | . | + | . | gene_id | "XLOC_228518"; | transcript_id | "Novel_003181"; | exon_number | "1"; | gene_type | " |
| Dt_chr9 | Cufflinks | exon | 44619058 | 44620316 | . | + | . | gene_id | "XLOC_228518"; | transcript_id | "Novel_003181"; | exon_number | "2"; | gene_type | " |
| Dt_chr9 | Cufflinks | exon | 46976087 | 46976264 | . | + | . | gene_id | "XLOC_228811"; | transcript_id | "Novel_003182"; | exon_number | "1"; | gene_type | " |
| Dt_chr9 | Cufflinks | exon | 46977115 | 46977199 | . | + | . | gene_id | "XLOC_228811"; | transcript_id | "Novel_003182"; | exon_number | "2"; | gene_type | " |
| Dt_chr9 | Cufflinks | exon | 46977280 | 46979206 | . | + | . | gene_id | "XLOC_228811"; | transcript_id | "Novel_003182"; | exon_number | "3"; | gene_type | " |
| Dt_chr9 | Cufflinks | exon | 47517559 | 47517806 | . | + | . | gene_id | "XLOC_228901"; | transcript_id | "Novel_003183"; | exon_number | "1"; | gene_type | " |
| Dt_chr9 | Cufflinks | exon | 47518471 | 47518564 | . | + | . | gene_id | "XLOC_228901"; | transcript_id | "Novel_003183"; | exon_number | "2"; | gene_type | " |
| Dt_chr9 | Cufflinks | exon | 47518709 | 47519238 | . | + | . | gene_id | "XLOC_228901"; | transcript_id | "Novel_003183"; | exon_number | "3"; | gene_type | " |
| Dt_chr9 | Cufflinks | exon | 47517560 | 47517806 | . | + | . | gene_id | "XLOC_228901"; | transcript_id | "Novel_003184"; | exon_number | "1"; | gene_type | " |
| Dt_chr9 | Cufflinks | exon | 47518471 | 47518564 | . | + | . | gene_id | "XLOC_228901"; | transcript_id | "Novel_003184"; | exon_number | "2"; | gene_type | " |
| Dt_chr9 | Cufflinks | exon | 47518709 | 47518885 | . | + | . | gene_id | "XLOC_228901"; | transcript_id | "Novel_003184"; | exon_number | "3"; | gene_type | " |
| Dt_chr9 | Cufflinks | exon | 47519239 | 47519932 | . | + | . | gene_id | "XLOC_228901"; | transcript_id | "Novel_003184"; | exon_number | "4"; | gene_type | " |
| Dt_chr9 | Cufflinks | exon | 47520468 | 47521613 | . | + | . | gene_id | "XLOC_228901"; | transcript_id | "Novel_003184"; | exon_number | "5"; | gene_type | " |
| Dt_chr9 | Cufflinks | exon | 47580156 | 47580311 | . | + | . | gene_id | "XLOC_228906"; | transcript_id | "Novel_003185"; | exon_number | "1"; | gene_type | " |
| Dt_chr9 | Cufflinks | exon | 47580690 | 47580944 | . | + | . | gene_id | "XLOC_228906"; | transcript_id | "Novel_003185"; | exon_number | "2"; | gene_type | " |
| Dt_chr9 | Cufflinks | exon | 47906945 | 47907461 | . | + | . | gene_id | "XLOC_228953"; | transcript_id | "Novel_003186"; | exon_number | "1"; | gene_type | " |
| Dt_chr9 | Cufflinks | exon | 47907553 | 47907635 | . | + | . | gene_id | "XLOC_228953"; | transcript_id | "Novel_003186"; | exon_number | "2"; | gene_type | " |
| Dt_chr9 | Cufflinks | exon | 47907730 | 47907929 | . | + | . | gene_id | "XLOC_228953"; | transcript_id | "Novel_003186"; | exon_number | "3"; | gene_type | " |
| Dt_chr9 | Cufflinks | exon | 47908204 | 47908851 | . | + | . | gene_id | "XLOC_228953"; | transcript_id | "Novel_003186"; | exon_number | "4"; | gene_type | " |
| Dt_chr9 | Cufflinks | exon | 47914744 | 47915138 | . | + | . | gene_id | "XLOC_228961"; | transcript_id | "Novel_003187"; | exon_number | "1"; | gene_type | " |
| Dt_chr9 | Cufflinks | exon | 47915231 | 47915295 | . | + | . | gene_id | "XLOC_228961"; | transcript_id | "Novel_003187"; | exon_number | "2"; | gene_type | " |
| Dt_chr9 | Cufflinks | exon | 47915413 | 47915503 | . | + | . | gene_id | "XLOC_228962"; | transcript_id | "Novel_003188"; | exon_number | "1"; | gene_type | " |
| Dt_chr9 | Cufflinks | exon | 47915883 | 47916040 | . | + | . | gene_id | "XLOC_228962"; | transcript_id | "Novel_003188"; | exon_number | "2"; | gene_type | " |
| Dt_chr9 | Cufflinks | exon | 47916120 | 47916155 | . | + | . | gene_id | "XLOC_228962"; | transcript_id | "Novel_003188"; | exon_number | "3"; | gene_type | " |
| Dt_chr9 | Cufflinks | exon | 47916349 | 47916436 | . | + | . | gene_id | "XLOC_228963"; | transcript_id | "Novel_003189"; | exon_number | "1"; | gene_type | " |

|         |           |      |          |          |   |   |   |         |                |               |                 |             |      |           |   |
|---------|-----------|------|----------|----------|---|---|---|---------|----------------|---------------|-----------------|-------------|------|-----------|---|
| Dt_chr9 | Cufflinks | exon | 47916529 | 47916809 | . | + | . | gene_id | "XLOC_228963"; | transcript_id | "Novel_003189"; | exon_number | "2"; | gene_type | " |
| Dt_chr9 | Cufflinks | exon | 47980414 | 47980527 | . | + | . | gene_id | "XLOC_228971"; | transcript_id | "Novel_003190"; | exon_number | "1"; | gene_type | " |
| Dt_chr9 | Cufflinks | exon | 47980664 | 47980735 | . | + | . | gene_id | "XLOC_228971"; | transcript_id | "Novel_003190"; | exon_number | "2"; | gene_type | " |
| Dt_chr9 | Cufflinks | exon | 47980840 | 47980916 | . | + | . | gene_id | "XLOC_228971"; | transcript_id | "Novel_003190"; | exon_number | "3"; | gene_type | " |
| Dt_chr9 | Cufflinks | exon | 47980989 | 47981079 | . | + | . | gene_id | "XLOC_228971"; | transcript_id | "Novel_003190"; | exon_number | "4"; | gene_type | " |
| Dt_chr9 | Cufflinks | exon | 47981184 | 47981471 | . | + | . | gene_id | "XLOC_228971"; | transcript_id | "Novel_003190"; | exon_number | "5"; | gene_type | " |
| Dt_chr9 | Cufflinks | exon | 48042479 | 48042905 | . | + | . | gene_id | "XLOC_228984"; | transcript_id | "Novel_003191"; | exon_number | "1"; | gene_type | " |
| Dt_chr9 | Cufflinks | exon | 48043064 | 48043311 | . | + | . | gene_id | "XLOC_228984"; | transcript_id | "Novel_003191"; | exon_number | "2"; | gene_type | " |
| Dt_chr9 | Cufflinks | exon | 48042606 | 48042905 | . | + | . | gene_id | "XLOC_228984"; | transcript_id | "Novel_003192"; | exon_number | "1"; | gene_type | " |
| Dt_chr9 | Cufflinks | exon | 48043064 | 48043138 | . | + | . | gene_id | "XLOC_228984"; | transcript_id | "Novel_003192"; | exon_number | "2"; | gene_type | " |
| Dt_chr9 | Cufflinks | exon | 48043471 | 48043572 | . | + | . | gene_id | "XLOC_228984"; | transcript_id | "Novel_003192"; | exon_number | "3"; | gene_type | " |
| Dt_chr9 | Cufflinks | exon | 48043833 | 48043886 | . | + | . | gene_id | "XLOC_228984"; | transcript_id | "Novel_003192"; | exon_number | "4"; | gene_type | " |
| Dt_chr9 | Cufflinks | exon | 48043965 | 48044057 | . | + | . | gene_id | "XLOC_228984"; | transcript_id | "Novel_003192"; | exon_number | "5"; | gene_type | " |
| Dt_chr9 | Cufflinks | exon | 48044137 | 48044229 | . | + | . | gene_id | "XLOC_228984"; | transcript_id | "Novel_003192"; | exon_number | "6"; | gene_type | " |
| Dt_chr9 | Cufflinks | exon | 48044308 | 48044412 | . | + | . | gene_id | "XLOC_228984"; | transcript_id | "Novel_003192"; | exon_number | "7"; | gene_type | " |
| Dt_chr9 | Cufflinks | exon | 48044528 | 48045523 | . | + | . | gene_id | "XLOC_228984"; | transcript_id | "Novel_003192"; | exon_number | "8"; | gene_type | " |
| Dt_chr9 | Cufflinks | exon | 48042610 | 48042905 | . | + | . | gene_id | "XLOC_228984"; | transcript_id | "Novel_003193"; | exon_number | "1"; | gene_type | " |
| Dt_chr9 | Cufflinks | exon | 48043064 | 48043138 | . | + | . | gene_id | "XLOC_228984"; | transcript_id | "Novel_003193"; | exon_number | "2"; | gene_type | " |
| Dt_chr9 | Cufflinks | exon | 48043471 | 48043572 | . | + | . | gene_id | "XLOC_228984"; | transcript_id | "Novel_003193"; | exon_number | "3"; | gene_type | " |
| Dt_chr9 | Cufflinks | exon | 48043833 | 48043886 | . | + | . | gene_id | "XLOC_228984"; | transcript_id | "Novel_003193"; | exon_number | "4"; | gene_type | " |
| Dt_chr9 | Cufflinks | exon | 48043965 | 48044057 | . | + | . | gene_id | "XLOC_228984"; | transcript_id | "Novel_003193"; | exon_number | "5"; | gene_type | " |
| Dt_chr9 | Cufflinks | exon | 48044137 | 48044387 | . | + | . | gene_id | "XLOC_228984"; | transcript_id | "Novel_003193"; | exon_number | "6"; | gene_type | " |
| Dt_chr9 | Cufflinks | exon | 48111430 | 48112134 | . | + | . | gene_id | "XLOC_228997"; | transcript_id | "Novel_003194"; | exon_number | "1"; | gene_type | " |
| Dt_chr9 | Cufflinks | exon | 48112235 | 48113209 | . | + | . | gene_id | "XLOC_228997"; | transcript_id | "Novel_003194"; | exon_number | "2"; | gene_type | " |
| Dt_chr9 | Cufflinks | exon | 48538494 | 48538757 | . | + | . | gene_id | "XLOC_229075"; | transcript_id | "Novel_003195"; | exon_number | "1"; | gene_type | " |
| Dt_chr9 | Cufflinks | exon | 48538850 | 48540128 | . | + | . | gene_id | "XLOC_229075"; | transcript_id | "Novel_003195"; | exon_number | "2"; | gene_type | " |
| Dt_chr9 | Cufflinks | exon | 49854131 | 49854988 | . | + | . | gene_id | "XLOC_229251"; | transcript_id | "Novel_003196"; | exon_number | "1"; | gene_type | " |
| Dt_chr9 | Cufflinks | exon | 51178390 | 51178600 | . | + | . | gene_id | "XLOC_229465"; | transcript_id | "Novel_003197"; | exon_number | "1"; | gene_type | " |
| Dt_chr9 | Cufflinks | exon | 51178737 | 51178920 | . | + | . | gene_id | "XLOC_229465"; | transcript_id | "Novel_003197"; | exon_number | "2"; | gene_type | " |
| Dt_chr9 | Cufflinks | exon | 51180264 | 51180790 | . | + | . | gene_id | "XLOC_229465"; | transcript_id | "Novel_003197"; | exon_number | "3"; | gene_type | " |
| Dt_chr9 | Cufflinks | exon | 51178664 | 51178920 | . | + | . | gene_id | "XLOC_229465"; | transcript_id | "Novel_003198"; | exon_number | "1"; | gene_type | " |
| Dt_chr9 | Cufflinks | exon | 51180264 | 51180790 | . | + | . | gene_id | "XLOC_229465"; | transcript_id | "Novel_003198"; | exon_number | "2"; | gene_type | " |
| Dt_chr9 | Cufflinks | exon | 51238218 | 51240019 | . | + | . | gene_id | "XLOC_229473"; | transcript_id | "Novel_003199"; | exon_number | "1"; | gene_type | " |
| Dt_chr9 | Cufflinks | exon | 51240226 | 51243329 | . | + | . | gene_id | "XLOC_229473"; | transcript_id | "Novel_003199"; | exon_number | "2"; | gene_type | " |
| Dt_chr9 | Cufflinks | exon | 51995686 | 51996008 | . | + | . | gene_id | "XLOC_229565"; | transcript_id | "Novel_003200"; | exon_number | "1"; | gene_type | " |

|         |           |      |          |          |   |   |   |         |                |               |                 |             |      |           |   |
|---------|-----------|------|----------|----------|---|---|---|---------|----------------|---------------|-----------------|-------------|------|-----------|---|
| Dt_chr9 | Cufflinks | exon | 51996102 | 51996193 | . | + | . | gene_id | "XLOC_229565"; | transcript_id | "Novel_003200"; | exon_number | "2"; | gene_type | " |
| Dt_chr9 | Cufflinks | exon | 51996302 | 51996964 | . | + | . | gene_id | "XLOC_229565"; | transcript_id | "Novel_003200"; | exon_number | "3"; | gene_type | " |
| Dt_chr9 | Cufflinks | exon | 52332567 | 52333148 | . | + | . | gene_id | "XLOC_229614"; | transcript_id | "Novel_003201"; | exon_number | "1"; | gene_type | " |
| Dt_chr9 | Cufflinks | exon | 52333255 | 52333395 | . | + | . | gene_id | "XLOC_229614"; | transcript_id | "Novel_003201"; | exon_number | "2"; | gene_type | " |
| Dt_chr9 | Cufflinks | exon | 52333518 | 52333637 | . | + | . | gene_id | "XLOC_229614"; | transcript_id | "Novel_003201"; | exon_number | "3"; | gene_type | " |
| Dt_chr9 | Cufflinks | exon | 52333787 | 52333882 | . | + | . | gene_id | "XLOC_229614"; | transcript_id | "Novel_003201"; | exon_number | "4"; | gene_type | " |
| Dt_chr9 | Cufflinks | exon | 52333965 | 52334508 | . | + | . | gene_id | "XLOC_229614"; | transcript_id | "Novel_003201"; | exon_number | "5"; | gene_type | " |
| Dt_chr9 | Cufflinks | exon | 52332567 | 52333637 | . | + | . | gene_id | "XLOC_229614"; | transcript_id | "Novel_003202"; | exon_number | "1"; | gene_type | " |
| Dt_chr9 | Cufflinks | exon | 52333787 | 52333882 | . | + | . | gene_id | "XLOC_229614"; | transcript_id | "Novel_003202"; | exon_number | "2"; | gene_type | " |
| Dt_chr9 | Cufflinks | exon | 52333965 | 52334508 | . | + | . | gene_id | "XLOC_229614"; | transcript_id | "Novel_003202"; | exon_number | "3"; | gene_type | " |
| Dt_chr9 | Cufflinks | exon | 52332657 | 52333148 | . | + | . | gene_id | "XLOC_229614"; | transcript_id | "Novel_003203"; | exon_number | "1"; | gene_type | " |
| Dt_chr9 | Cufflinks | exon | 52333343 | 52333395 | . | + | . | gene_id | "XLOC_229614"; | transcript_id | "Novel_003203"; | exon_number | "2"; | gene_type | " |
| Dt_chr9 | Cufflinks | exon | 52333518 | 52333637 | . | + | . | gene_id | "XLOC_229614"; | transcript_id | "Novel_003203"; | exon_number | "3"; | gene_type | " |
| Dt_chr9 | Cufflinks | exon | 52333787 | 52333882 | . | + | . | gene_id | "XLOC_229614"; | transcript_id | "Novel_003203"; | exon_number | "4"; | gene_type | " |
| Dt_chr9 | Cufflinks | exon | 52333965 | 52334368 | . | + | . | gene_id | "XLOC_229614"; | transcript_id | "Novel_003203"; | exon_number | "5"; | gene_type | " |
| Dt_chr9 | Cufflinks | exon | 52762064 | 52762345 | . | + | . | gene_id | "XLOC_229657"; | transcript_id | "Novel_003204"; | exon_number | "1"; | gene_type | " |
| Dt_chr9 | Cufflinks | exon | 52762858 | 52762955 | . | + | . | gene_id | "XLOC_229657"; | transcript_id | "Novel_003204"; | exon_number | "2"; | gene_type | " |
| Dt_chr9 | Cufflinks | exon | 52763051 | 52763081 | . | + | . | gene_id | "XLOC_229657"; | transcript_id | "Novel_003204"; | exon_number | "3"; | gene_type | " |
| Dt_chr9 | Cufflinks | exon | 52763320 | 52763419 | . | + | . | gene_id | "XLOC_229657"; | transcript_id | "Novel_003204"; | exon_number | "4"; | gene_type | " |
| Dt_chr9 | Cufflinks | exon | 52763547 | 52763617 | . | + | . | gene_id | "XLOC_229657"; | transcript_id | "Novel_003204"; | exon_number | "5"; | gene_type | " |
| Dt_chr9 | Cufflinks | exon | 52763749 | 52763892 | . | + | . | gene_id | "XLOC_229657"; | transcript_id | "Novel_003204"; | exon_number | "6"; | gene_type | " |
| Dt_chr9 | Cufflinks | exon | 52763989 | 52764738 | . | + | . | gene_id | "XLOC_229657"; | transcript_id | "Novel_003204"; | exon_number | "7"; | gene_type | " |
| Dt_chr9 | Cufflinks | exon | 52935561 | 52935753 | . | + | . | gene_id | "XLOC_229690"; | transcript_id | "Novel_003205"; | exon_number | "1"; | gene_type | " |
| Dt_chr9 | Cufflinks | exon | 52936034 | 52937526 | . | + | . | gene_id | "XLOC_229690"; | transcript_id | "Novel_003205"; | exon_number | "2"; | gene_type | " |
| Dt_chr9 | Cufflinks | exon | 53926943 | 53927357 | . | + | . | gene_id | "XLOC_229909"; | transcript_id | "Novel_003206"; | exon_number | "1"; | gene_type | " |
| Dt_chr9 | Cufflinks | exon | 53927693 | 53928625 | . | + | . | gene_id | "XLOC_229909"; | transcript_id | "Novel_003206"; | exon_number | "2"; | gene_type | " |
| Dt_chr9 | Cufflinks | exon | 55836478 | 55837171 | . | + | . | gene_id | "XLOC_230276"; | transcript_id | "Novel_003207"; | exon_number | "1"; | gene_type | " |
| Dt_chr9 | Cufflinks | exon | 56111194 | 56111435 | . | + | . | gene_id | "XLOC_230311"; | transcript_id | "Novel_003208"; | exon_number | "1"; | gene_type | " |
| Dt_chr9 | Cufflinks | exon | 56111783 | 56111899 | . | + | . | gene_id | "XLOC_230311"; | transcript_id | "Novel_003208"; | exon_number | "2"; | gene_type | " |
| Dt_chr9 | Cufflinks | exon | 56112167 | 56112205 | . | + | . | gene_id | "XLOC_230311"; | transcript_id | "Novel_003208"; | exon_number | "3"; | gene_type | " |
| Dt_chr9 | Cufflinks | exon | 56112801 | 56112903 | . | + | . | gene_id | "XLOC_230311"; | transcript_id | "Novel_003209"; | exon_number | "1"; | gene_type | " |
| Dt_chr9 | Cufflinks | exon | 56113001 | 56113297 | . | + | . | gene_id | "XLOC_230311"; | transcript_id | "Novel_003209"; | exon_number | "2"; | gene_type | " |
| Dt_chr9 | Cufflinks | exon | 56267914 | 56268180 | . | + | . | gene_id | "XLOC_230344"; | transcript_id | "Novel_003210"; | exon_number | "1"; | gene_type | " |
| Dt_chr9 | Cufflinks | exon | 56268959 | 56271281 | . | + | . | gene_id | "XLOC_230344"; | transcript_id | "Novel_003210"; | exon_number | "2"; | gene_type | " |
| Dt_chr9 | Cufflinks | exon | 56267943 | 56269519 | . | + | . | gene_id | "XLOC_230344"; | transcript_id | "Novel_003211"; | exon_number | "1"; | gene_type | " |

|         |           |      |          |          |   |   |   |         |                |               |                 |             |      |           |   |
|---------|-----------|------|----------|----------|---|---|---|---------|----------------|---------------|-----------------|-------------|------|-----------|---|
| Dt_chr9 | Cufflinks | exon | 56269947 | 56271328 | . | + | . | gene_id | "XLOC_230344"; | transcript_id | "Novel_003211"; | exon_number | "2"; | gene_type | " |
| Dt_chr9 | Cufflinks | exon | 56267943 | 56268173 | . | + | . | gene_id | "XLOC_230344"; | transcript_id | "Novel_003212"; | exon_number | "1"; | gene_type | " |
| Dt_chr9 | Cufflinks | exon | 56268959 | 56269519 | . | + | . | gene_id | "XLOC_230344"; | transcript_id | "Novel_003212"; | exon_number | "2"; | gene_type | " |
| Dt_chr9 | Cufflinks | exon | 56269947 | 56271328 | . | + | . | gene_id | "XLOC_230344"; | transcript_id | "Novel_003212"; | exon_number | "3"; | gene_type | " |
| Dt_chr9 | Cufflinks | exon | 56267943 | 56268180 | . | + | . | gene_id | "XLOC_230344"; | transcript_id | "Novel_003213"; | exon_number | "1"; | gene_type | " |
| Dt_chr9 | Cufflinks | exon | 56268959 | 56269519 | . | + | . | gene_id | "XLOC_230344"; | transcript_id | "Novel_003213"; | exon_number | "2"; | gene_type | " |
| Dt_chr9 | Cufflinks | exon | 56269947 | 56271328 | . | + | . | gene_id | "XLOC_230344"; | transcript_id | "Novel_003213"; | exon_number | "3"; | gene_type | " |
| Dt_chr9 | Cufflinks | exon | 56536451 | 56536847 | . | + | . | gene_id | "XLOC_230392"; | transcript_id | "Novel_003214"; | exon_number | "1"; | gene_type | " |
| Dt_chr9 | Cufflinks | exon | 56537020 | 56537315 | . | + | . | gene_id | "XLOC_230392"; | transcript_id | "Novel_003214"; | exon_number | "2"; | gene_type | " |
| Dt_chr9 | Cufflinks | exon | 56537498 | 56538091 | . | + | . | gene_id | "XLOC_230392"; | transcript_id | "Novel_003214"; | exon_number | "3"; | gene_type | " |
| Dt_chr9 | Cufflinks | exon | 56889261 | 56889402 | . | + | . | gene_id | "XLOC_230424"; | transcript_id | "Novel_003215"; | exon_number | "1"; | gene_type | " |
| Dt_chr9 | Cufflinks | exon | 56890190 | 56890281 | . | + | . | gene_id | "XLOC_230424"; | transcript_id | "Novel_003215"; | exon_number | "2"; | gene_type | " |
| Dt_chr9 | Cufflinks | exon | 56890946 | 56891977 | . | + | . | gene_id | "XLOC_230424"; | transcript_id | "Novel_003215"; | exon_number | "3"; | gene_type | " |
| Dt_chr9 | Cufflinks | exon | 56889294 | 56889402 | . | + | . | gene_id | "XLOC_230424"; | transcript_id | "Novel_003216"; | exon_number | "1"; | gene_type | " |
| Dt_chr9 | Cufflinks | exon | 56890190 | 56890456 | . | + | . | gene_id | "XLOC_230424"; | transcript_id | "Novel_003216"; | exon_number | "2"; | gene_type | " |
| Dt_chr9 | Cufflinks | exon | 56890946 | 56891731 | . | + | . | gene_id | "XLOC_230424"; | transcript_id | "Novel_003216"; | exon_number | "3"; | gene_type | " |
| Dt_chr9 | Cufflinks | exon | 57155514 | 57155548 | . | + | . | gene_id | "XLOC_230458"; | transcript_id | "Novel_003217"; | exon_number | "1"; | gene_type | " |
| Dt_chr9 | Cufflinks | exon | 57155924 | 57156025 | . | + | . | gene_id | "XLOC_230458"; | transcript_id | "Novel_003217"; | exon_number | "2"; | gene_type | " |
| Dt_chr9 | Cufflinks | exon | 57156140 | 57156273 | . | + | . | gene_id | "XLOC_230458"; | transcript_id | "Novel_003217"; | exon_number | "3"; | gene_type | " |
| Dt_chr9 | Cufflinks | exon | 57156855 | 57157168 | . | + | . | gene_id | "XLOC_230458"; | transcript_id | "Novel_003217"; | exon_number | "4"; | gene_type | " |
| Dt_chr9 | Cufflinks | exon | 57768910 | 57769280 | . | + | . | gene_id | "XLOC_230586"; | transcript_id | "Novel_003218"; | exon_number | "1"; | gene_type | " |
| Dt_chr9 | Cufflinks | exon | 57769368 | 57769900 | . | + | . | gene_id | "XLOC_230586"; | transcript_id | "Novel_003218"; | exon_number | "2"; | gene_type | " |
| Dt_chr9 | Cufflinks | exon | 57825940 | 57826272 | . | + | . | gene_id | "XLOC_230590"; | transcript_id | "Novel_003219"; | exon_number | "1"; | gene_type | " |
| Dt_chr9 | Cufflinks | exon | 57827468 | 57827669 | . | + | . | gene_id | "XLOC_230590"; | transcript_id | "Novel_003219"; | exon_number | "2"; | gene_type | " |
| Dt_chr9 | Cufflinks | exon | 57827911 | 57828020 | . | + | . | gene_id | "XLOC_230590"; | transcript_id | "Novel_003219"; | exon_number | "3"; | gene_type | " |
| Dt_chr9 | Cufflinks | exon | 57828107 | 57828181 | . | + | . | gene_id | "XLOC_230590"; | transcript_id | "Novel_003219"; | exon_number | "4"; | gene_type | " |
| Dt_chr9 | Cufflinks | exon | 57829083 | 57829253 | . | + | . | gene_id | "XLOC_230590"; | transcript_id | "Novel_003219"; | exon_number | "5"; | gene_type | " |
| Dt_chr9 | Cufflinks | exon | 57829334 | 57829924 | . | + | . | gene_id | "XLOC_230590"; | transcript_id | "Novel_003219"; | exon_number | "6"; | gene_type | " |
| Dt_chr9 | Cufflinks | exon | 57826374 | 57828020 | . | + | . | gene_id | "XLOC_230590"; | transcript_id | "Novel_003220"; | exon_number | "1"; | gene_type | " |
| Dt_chr9 | Cufflinks | exon | 57828107 | 57828181 | . | + | . | gene_id | "XLOC_230590"; | transcript_id | "Novel_003220"; | exon_number | "2"; | gene_type | " |
| Dt_chr9 | Cufflinks | exon | 57829083 | 57829253 | . | + | . | gene_id | "XLOC_230590"; | transcript_id | "Novel_003220"; | exon_number | "3"; | gene_type | " |
| Dt_chr9 | Cufflinks | exon | 57829334 | 57830159 | . | + | . | gene_id | "XLOC_230590"; | transcript_id | "Novel_003220"; | exon_number | "4"; | gene_type | " |
| Dt_chr9 | Cufflinks | exon | 57828687 | 57829253 | . | + | . | gene_id | "XLOC_230590"; | transcript_id | "Novel_003221"; | exon_number | "1"; | gene_type | " |
| Dt_chr9 | Cufflinks | exon | 57829334 | 57829870 | . | + | . | gene_id | "XLOC_230590"; | transcript_id | "Novel_003221"; | exon_number | "2"; | gene_type | " |
| Dt_chr9 | Cufflinks | exon | 57895480 | 57895681 | . | + | . | gene_id | "XLOC_230605"; | transcript_id | "Novel_003222"; | exon_number | "1"; | gene_type | " |

|         |           |      |          |          |   |   |   |         |                |               |                 |             |      |           |   |
|---------|-----------|------|----------|----------|---|---|---|---------|----------------|---------------|-----------------|-------------|------|-----------|---|
| Dt_chr9 | Cufflinks | exon | 59229190 | 59229231 | . | + | . | gene_id | "XLOC_230844"; | transcript_id | "Novel_003223"; | exon_number | "1"; | gene_type | " |
| Dt_chr9 | Cufflinks | exon | 59229780 | 59229959 | . | + | . | gene_id | "XLOC_230844"; | transcript_id | "Novel_003223"; | exon_number | "2"; | gene_type | " |
| Dt_chr9 | Cufflinks | exon | 59230093 | 59230140 | . | + | . | gene_id | "XLOC_230844"; | transcript_id | "Novel_003223"; | exon_number | "3"; | gene_type | " |
| Dt_chr9 | Cufflinks | exon | 59230229 | 59230291 | . | + | . | gene_id | "XLOC_230844"; | transcript_id | "Novel_003223"; | exon_number | "4"; | gene_type | " |
| Dt_chr9 | Cufflinks | exon | 59230541 | 59230594 | . | + | . | gene_id | "XLOC_230844"; | transcript_id | "Novel_003223"; | exon_number | "5"; | gene_type | " |
| Dt_chr9 | Cufflinks | exon | 59230698 | 59230784 | . | + | . | gene_id | "XLOC_230844"; | transcript_id | "Novel_003223"; | exon_number | "6"; | gene_type | " |
| Dt_chr9 | Cufflinks | exon | 59230904 | 59231522 | . | + | . | gene_id | "XLOC_230844"; | transcript_id | "Novel_003223"; | exon_number | "7"; | gene_type | " |
| Dt_chr9 | Cufflinks | exon | 59750136 | 59751285 | . | + | . | gene_id | "XLOC_230933"; | transcript_id | "Novel_003224"; | exon_number | "1"; | gene_type | " |
| Dt_chr9 | Cufflinks | exon | 59752015 | 59752312 | . | + | . | gene_id | "XLOC_230933"; | transcript_id | "Novel_003224"; | exon_number | "2"; | gene_type | " |
| Dt_chr9 | Cufflinks | exon | 60040501 | 60041169 | . | + | . | gene_id | "XLOC_230994"; | transcript_id | "Novel_003225"; | exon_number | "1"; | gene_type | " |
| Dt_chr9 | Cufflinks | exon | 60041738 | 60042007 | . | + | . | gene_id | "XLOC_230994"; | transcript_id | "Novel_003225"; | exon_number | "2"; | gene_type | " |
| Dt_chr9 | Cufflinks | exon | 60042195 | 60043086 | . | + | . | gene_id | "XLOC_230994"; | transcript_id | "Novel_003225"; | exon_number | "3"; | gene_type | " |
| Dt_chr9 | Cufflinks | exon | 60555508 | 60555618 | . | + | . | gene_id | "XLOC_231097"; | transcript_id | "Novel_003226"; | exon_number | "1"; | gene_type | " |
| Dt_chr9 | Cufflinks | exon | 60556217 | 60558144 | . | + | . | gene_id | "XLOC_231097"; | transcript_id | "Novel_003226"; | exon_number | "2"; | gene_type | " |
| Dt_chr9 | Cufflinks | exon | 61087712 | 61088180 | . | + | . | gene_id | "XLOC_231209"; | transcript_id | "Novel_003227"; | exon_number | "1"; | gene_type | " |
| Dt_chr9 | Cufflinks | exon | 61088369 | 61088415 | . | + | . | gene_id | "XLOC_231209"; | transcript_id | "Novel_003227"; | exon_number | "2"; | gene_type | " |
| Dt_chr9 | Cufflinks | exon | 61088972 | 61089093 | . | + | . | gene_id | "XLOC_231209"; | transcript_id | "Novel_003227"; | exon_number | "3"; | gene_type | " |
| Dt_chr9 | Cufflinks | exon | 61089175 | 61089286 | . | + | . | gene_id | "XLOC_231209"; | transcript_id | "Novel_003227"; | exon_number | "4"; | gene_type | " |
| Dt_chr9 | Cufflinks | exon | 61089373 | 61089478 | . | + | . | gene_id | "XLOC_231209"; | transcript_id | "Novel_003227"; | exon_number | "5"; | gene_type | " |
| Dt_chr9 | Cufflinks | exon | 61089763 | 61089954 | . | + | . | gene_id | "XLOC_231209"; | transcript_id | "Novel_003227"; | exon_number | "6"; | gene_type | " |
| Dt_chr9 | Cufflinks | exon | 61090122 | 61091264 | . | + | . | gene_id | "XLOC_231209"; | transcript_id | "Novel_003227"; | exon_number | "7"; | gene_type | " |
| Dt_chr9 | Cufflinks | exon | 61089681 | 61089954 | . | + | . | gene_id | "XLOC_231209"; | transcript_id | "Novel_003228"; | exon_number | "1"; | gene_type | " |
| Dt_chr9 | Cufflinks | exon | 61090122 | 61090420 | . | + | . | gene_id | "XLOC_231209"; | transcript_id | "Novel_003228"; | exon_number | "2"; | gene_type | " |
| Dt_chr9 | Cufflinks | exon | 61180240 | 61180347 | . | + | . | gene_id | "XLOC_231230"; | transcript_id | "Novel_003229"; | exon_number | "1"; | gene_type | " |
| Dt_chr9 | Cufflinks | exon | 61181062 | 61183437 | . | + | . | gene_id | "XLOC_231230"; | transcript_id | "Novel_003229"; | exon_number | "2"; | gene_type | " |
| Dt_chr9 | Cufflinks | exon | 61180505 | 61180720 | . | + | . | gene_id | "XLOC_231230"; | transcript_id | "Novel_003230"; | exon_number | "1"; | gene_type | " |
| Dt_chr9 | Cufflinks | exon | 61181062 | 61183217 | . | + | . | gene_id | "XLOC_231230"; | transcript_id | "Novel_003230"; | exon_number | "2"; | gene_type | " |
| Dt_chr9 | Cufflinks | exon | 62030128 | 62030642 | . | + | . | gene_id | "XLOC_231345"; | transcript_id | "Novel_003231"; | exon_number | "1"; | gene_type | " |
| Dt_chr9 | Cufflinks | exon | 62031300 | 62031791 | . | + | . | gene_id | "XLOC_231345"; | transcript_id | "Novel_003231"; | exon_number | "2"; | gene_type | " |
| Dt_chr9 | Cufflinks | exon | 63586392 | 63586664 | . | + | . | gene_id | "XLOC_231672"; | transcript_id | "Novel_003232"; | exon_number | "1"; | gene_type | " |
| Dt_chr9 | Cufflinks | exon | 63586960 | 63589163 | . | + | . | gene_id | "XLOC_231672"; | transcript_id | "Novel_003232"; | exon_number | "2"; | gene_type | " |
| Dt_chr9 | Cufflinks | exon | 63589272 | 63589328 | . | + | . | gene_id | "XLOC_231672"; | transcript_id | "Novel_003232"; | exon_number | "3"; | gene_type | " |
| Dt_chr9 | Cufflinks | exon | 63590044 | 63590927 | . | + | . | gene_id | "XLOC_231672"; | transcript_id | "Novel_003232"; | exon_number | "4"; | gene_type | " |
| Dt_chr9 | Cufflinks | exon | 63586392 | 63586664 | . | + | . | gene_id | "XLOC_231672"; | transcript_id | "Novel_003233"; | exon_number | "1"; | gene_type | " |
| Dt_chr9 | Cufflinks | exon | 63586960 | 63589163 | . | + | . | gene_id | "XLOC_231672"; | transcript_id | "Novel_003233"; | exon_number | "2"; | gene_type | " |

|         |           |      |          |          |   |   |   |         |                |               |                 |             |      |           |   |
|---------|-----------|------|----------|----------|---|---|---|---------|----------------|---------------|-----------------|-------------|------|-----------|---|
| Dt_chr9 | Cufflinks | exon | 63589275 | 63589328 | . | + | . | gene_id | "XLOC_231672"; | transcript_id | "Novel_003233"; | exon_number | "3"; | gene_type | " |
| Dt_chr9 | Cufflinks | exon | 63590044 | 63590927 | . | + | . | gene_id | "XLOC_231672"; | transcript_id | "Novel_003233"; | exon_number | "4"; | gene_type | " |
| Dt_chr9 | Cufflinks | exon | 63766713 | 63768036 | . | + | . | gene_id | "XLOC_231698"; | transcript_id | "Novel_003234"; | exon_number | "1"; | gene_type | " |
| Dt_chr9 | Cufflinks | exon | 63768491 | 63768642 | . | + | . | gene_id | "XLOC_231698"; | transcript_id | "Novel_003234"; | exon_number | "2"; | gene_type | " |
| Dt_chr9 | Cufflinks | exon | 63768998 | 63769505 | . | + | . | gene_id | "XLOC_231698"; | transcript_id | "Novel_003234"; | exon_number | "3"; | gene_type | " |
| Dt_chr9 | Cufflinks | exon | 64132469 | 64132968 | . | + | . | gene_id | "XLOC_231771"; | transcript_id | "Novel_003235"; | exon_number | "1"; | gene_type | " |
| Dt_chr9 | Cufflinks | exon | 64133092 | 64135129 | . | + | . | gene_id | "XLOC_231771"; | transcript_id | "Novel_003235"; | exon_number | "2"; | gene_type | " |
| Dt_chr9 | Cufflinks | exon | 64132488 | 64132645 | . | + | . | gene_id | "XLOC_231771"; | transcript_id | "Novel_003236"; | exon_number | "1"; | gene_type | " |
| Dt_chr9 | Cufflinks | exon | 64132776 | 64134350 | . | + | . | gene_id | "XLOC_231771"; | transcript_id | "Novel_003236"; | exon_number | "2"; | gene_type | " |
| Dt_chr9 | Cufflinks | exon | 64132488 | 64132527 | . | + | . | gene_id | "XLOC_231771"; | transcript_id | "Novel_003237"; | exon_number | "1"; | gene_type | " |
| Dt_chr9 | Cufflinks | exon | 64133092 | 64134357 | . | + | . | gene_id | "XLOC_231771"; | transcript_id | "Novel_003237"; | exon_number | "2"; | gene_type | " |
| Dt_chr9 | Cufflinks | exon | 64604474 | 64605398 | . | + | . | gene_id | "XLOC_231862"; | transcript_id | "Novel_003238"; | exon_number | "1"; | gene_type | " |
| Dt_chr9 | Cufflinks | exon | 64605472 | 64606358 | . | + | . | gene_id | "XLOC_231862"; | transcript_id | "Novel_003238"; | exon_number | "2"; | gene_type | " |
| Dt_chr9 | Cufflinks | exon | 65359050 | 65359090 | . | + | . | gene_id | "XLOC_231993"; | transcript_id | "Novel_003239"; | exon_number | "1"; | gene_type | " |
| Dt_chr9 | Cufflinks | exon | 65359186 | 65359565 | . | + | . | gene_id | "XLOC_231993"; | transcript_id | "Novel_003239"; | exon_number | "2"; | gene_type | " |
| Dt_chr9 | Cufflinks | exon | 65359669 | 65360664 | . | + | . | gene_id | "XLOC_231993"; | transcript_id | "Novel_003239"; | exon_number | "3"; | gene_type | " |
| Dt_chr9 | Cufflinks | exon | 65916185 | 65916415 | . | + | . | gene_id | "XLOC_232095"; | transcript_id | "Novel_003240"; | exon_number | "1"; | gene_type | " |
| Dt_chr9 | Cufflinks | exon | 65916892 | 65917980 | . | + | . | gene_id | "XLOC_232095"; | transcript_id | "Novel_003240"; | exon_number | "2"; | gene_type | " |
| Dt_chr9 | Cufflinks | exon | 65918351 | 65919120 | . | + | . | gene_id | "XLOC_232095"; | transcript_id | "Novel_003240"; | exon_number | "3"; | gene_type | " |
| Dt_chr9 | Cufflinks | exon | 66490853 | 66491200 | . | + | . | gene_id | "XLOC_232209"; | transcript_id | "Novel_003241"; | exon_number | "1"; | gene_type | " |
| Dt_chr9 | Cufflinks | exon | 66491984 | 66492057 | . | + | . | gene_id | "XLOC_232209"; | transcript_id | "Novel_003241"; | exon_number | "2"; | gene_type | " |
| Dt_chr9 | Cufflinks | exon | 66492159 | 66492423 | . | + | . | gene_id | "XLOC_232209"; | transcript_id | "Novel_003241"; | exon_number | "3"; | gene_type | " |
| Dt_chr9 | Cufflinks | exon | 66492790 | 66492921 | . | + | . | gene_id | "XLOC_232209"; | transcript_id | "Novel_003241"; | exon_number | "4"; | gene_type | " |
| Dt_chr9 | Cufflinks | exon | 66493081 | 66493216 | . | + | . | gene_id | "XLOC_232209"; | transcript_id | "Novel_003241"; | exon_number | "5"; | gene_type | " |
| Dt_chr9 | Cufflinks | exon | 66493294 | 66493785 | . | + | . | gene_id | "XLOC_232209"; | transcript_id | "Novel_003241"; | exon_number | "6"; | gene_type | " |
| Dt_chr9 | Cufflinks | exon | 67906471 | 67906704 | . | + | . | gene_id | "XLOC_232482"; | transcript_id | "Novel_003242"; | exon_number | "1"; | gene_type | " |
| Dt_chr9 | Cufflinks | exon | 67907293 | 67908738 | . | + | . | gene_id | "XLOC_232482"; | transcript_id | "Novel_003242"; | exon_number | "2"; | gene_type | " |
| Dt_chr9 | Cufflinks | exon | 69275022 | 69275249 | . | + | . | gene_id | "XLOC_232694"; | transcript_id | "Novel_003243"; | exon_number | "1"; | gene_type | " |
| Dt_chr9 | Cufflinks | exon | 69275392 | 69275446 | . | + | . | gene_id | "XLOC_232694"; | transcript_id | "Novel_003243"; | exon_number | "2"; | gene_type | " |
| Dt_chr9 | Cufflinks | exon | 69275533 | 69275655 | . | + | . | gene_id | "XLOC_232694"; | transcript_id | "Novel_003243"; | exon_number | "3"; | gene_type | " |
| Dt_chr9 | Cufflinks | exon | 69275972 | 69276028 | . | + | . | gene_id | "XLOC_232694"; | transcript_id | "Novel_003243"; | exon_number | "4"; | gene_type | " |
| Dt_chr9 | Cufflinks | exon | 69276230 | 69276624 | . | + | . | gene_id | "XLOC_232694"; | transcript_id | "Novel_003243"; | exon_number | "5"; | gene_type | " |
| Dt_chr9 | Cufflinks | exon | 69674751 | 69674889 | . | + | . | gene_id | "XLOC_232767"; | transcript_id | "Novel_003244"; | exon_number | "1"; | gene_type | " |
| Dt_chr9 | Cufflinks | exon | 69674998 | 69675224 | . | + | . | gene_id | "XLOC_232767"; | transcript_id | "Novel_003244"; | exon_number | "2"; | gene_type | " |
| Dt_chr9 | Cufflinks | exon | 1339512  | 1339709  | . | - | . | gene_id | "XLOC_233158"; | transcript_id | "Novel_003245"; | exon_number | "1"; | gene_type | " |





|         |           |      |          |          |   |   |   |         |                |               |                 |             |      |           |   |
|---------|-----------|------|----------|----------|---|---|---|---------|----------------|---------------|-----------------|-------------|------|-----------|---|
| Dt_chr9 | Cufflinks | exon | 3147259  | 3147388  | . | - | . | gene_id | "XLOC_233326"; | transcript_id | "Novel_003255"; | exon_number | "3"; | gene_type | " |
| Dt_chr9 | Cufflinks | exon | 3144119  | 3146577  | . | - | . | gene_id | "XLOC_233326"; | transcript_id | "Novel_003256"; | exon_number | "1"; | gene_type | " |
| Dt_chr9 | Cufflinks | exon | 3147259  | 3147366  | . | - | . | gene_id | "XLOC_233326"; | transcript_id | "Novel_003256"; | exon_number | "2"; | gene_type | " |
| Dt_chr9 | Cufflinks | exon | 4634617  | 4636017  | . | - | . | gene_id | "XLOC_233528"; | transcript_id | "Novel_003257"; | exon_number | "1"; | gene_type | " |
| Dt_chr9 | Cufflinks | exon | 4793867  | 4793906  | . | - | . | gene_id | "XLOC_233533"; | transcript_id | "Novel_003258"; | exon_number | "1"; | gene_type | " |
| Dt_chr9 | Cufflinks | exon | 4794013  | 4794126  | . | - | . | gene_id | "XLOC_233533"; | transcript_id | "Novel_003258"; | exon_number | "2"; | gene_type | " |
| Dt_chr9 | Cufflinks | exon | 4794225  | 4794356  | . | - | . | gene_id | "XLOC_233533"; | transcript_id | "Novel_003258"; | exon_number | "3"; | gene_type | " |
| Dt_chr9 | Cufflinks | exon | 4794640  | 4794668  | . | - | . | gene_id | "XLOC_233533"; | transcript_id | "Novel_003258"; | exon_number | "4"; | gene_type | " |
| Dt_chr9 | Cufflinks | exon | 10611119 | 10611972 | . | - | . | gene_id | "XLOC_233949"; | transcript_id | "Novel_003259"; | exon_number | "1"; | gene_type | " |
| Dt_chr9 | Cufflinks | exon | 10612190 | 10612502 | . | - | . | gene_id | "XLOC_233949"; | transcript_id | "Novel_003259"; | exon_number | "2"; | gene_type | " |
| Dt_chr9 | Cufflinks | exon | 10613137 | 10613443 | . | - | . | gene_id | "XLOC_233949"; | transcript_id | "Novel_003259"; | exon_number | "3"; | gene_type | " |
| Dt_chr9 | Cufflinks | exon | 10614164 | 10614294 | . | - | . | gene_id | "XLOC_233949"; | transcript_id | "Novel_003259"; | exon_number | "4"; | gene_type | " |
| Dt_chr9 | Cufflinks | exon | 10614648 | 10615005 | . | - | . | gene_id | "XLOC_233949"; | transcript_id | "Novel_003259"; | exon_number | "5"; | gene_type | " |
| Dt_chr9 | Cufflinks | exon | 10615698 | 10615816 | . | - | . | gene_id | "XLOC_233949"; | transcript_id | "Novel_003259"; | exon_number | "6"; | gene_type | " |
| Dt_chr9 | Cufflinks | exon | 10616056 | 10616202 | . | - | . | gene_id | "XLOC_233949"; | transcript_id | "Novel_003259"; | exon_number | "7"; | gene_type | " |
| Dt_chr9 | Cufflinks | exon | 10611134 | 10611972 | . | - | . | gene_id | "XLOC_233949"; | transcript_id | "Novel_003260"; | exon_number | "1"; | gene_type | " |
| Dt_chr9 | Cufflinks | exon | 10612190 | 10612502 | . | - | . | gene_id | "XLOC_233949"; | transcript_id | "Novel_003260"; | exon_number | "2"; | gene_type | " |
| Dt_chr9 | Cufflinks | exon | 10613137 | 10613629 | . | - | . | gene_id | "XLOC_233949"; | transcript_id | "Novel_003260"; | exon_number | "3"; | gene_type | " |
| Dt_chr9 | Cufflinks | exon | 10611165 | 10611485 | . | - | . | gene_id | "XLOC_233949"; | transcript_id | "Novel_003261"; | exon_number | "1"; | gene_type | " |
| Dt_chr9 | Cufflinks | exon | 10611854 | 10611972 | . | - | . | gene_id | "XLOC_233949"; | transcript_id | "Novel_003261"; | exon_number | "2"; | gene_type | " |
| Dt_chr9 | Cufflinks | exon | 10612190 | 10612502 | . | - | . | gene_id | "XLOC_233949"; | transcript_id | "Novel_003261"; | exon_number | "3"; | gene_type | " |
| Dt_chr9 | Cufflinks | exon | 10613137 | 10613443 | . | - | . | gene_id | "XLOC_233949"; | transcript_id | "Novel_003261"; | exon_number | "4"; | gene_type | " |
| Dt_chr9 | Cufflinks | exon | 10614164 | 10614294 | . | - | . | gene_id | "XLOC_233949"; | transcript_id | "Novel_003261"; | exon_number | "5"; | gene_type | " |
| Dt_chr9 | Cufflinks | exon | 10614648 | 10615648 | . | - | . | gene_id | "XLOC_233949"; | transcript_id | "Novel_003261"; | exon_number | "6"; | gene_type | " |
| Dt_chr9 | Cufflinks | exon | 10613080 | 10613443 | . | - | . | gene_id | "XLOC_233949"; | transcript_id | "Novel_003262"; | exon_number | "1"; | gene_type | " |
| Dt_chr9 | Cufflinks | exon | 10614164 | 10614294 | . | - | . | gene_id | "XLOC_233949"; | transcript_id | "Novel_003262"; | exon_number | "2"; | gene_type | " |
| Dt_chr9 | Cufflinks | exon | 10614648 | 10615816 | . | - | . | gene_id | "XLOC_233949"; | transcript_id | "Novel_003262"; | exon_number | "3"; | gene_type | " |
| Dt_chr9 | Cufflinks | exon | 10616056 | 10616202 | . | - | . | gene_id | "XLOC_233949"; | transcript_id | "Novel_003262"; | exon_number | "4"; | gene_type | " |
| Dt_chr9 | Cufflinks | exon | 10613969 | 10614294 | . | - | . | gene_id | "XLOC_233949"; | transcript_id | "Novel_003263"; | exon_number | "1"; | gene_type | " |
| Dt_chr9 | Cufflinks | exon | 10614648 | 10615005 | . | - | . | gene_id | "XLOC_233949"; | transcript_id | "Novel_003263"; | exon_number | "2"; | gene_type | " |
| Dt_chr9 | Cufflinks | exon | 10616056 | 10616156 | . | - | . | gene_id | "XLOC_233949"; | transcript_id | "Novel_003263"; | exon_number | "3"; | gene_type | " |
| Dt_chr9 | Cufflinks | exon | 12291543 | 12292825 | . | - | . | gene_id | "XLOC_234019"; | transcript_id | "Novel_003264"; | exon_number | "1"; | gene_type | " |
| Dt_chr9 | Cufflinks | exon | 14578736 | 14579150 | . | - | . | gene_id | "XLOC_234110"; | transcript_id | "Novel_003265"; | exon_number | "1"; | gene_type | " |
| Dt_chr9 | Cufflinks | exon | 14579253 | 14579321 | . | - | . | gene_id | "XLOC_234110"; | transcript_id | "Novel_003265"; | exon_number | "2"; | gene_type | " |
| Dt_chr9 | Cufflinks | exon | 14579428 | 14579541 | . | - | . | gene_id | "XLOC_234110"; | transcript_id | "Novel_003265"; | exon_number | "3"; | gene_type | " |

|         |           |      |          |          |   |   |   |         |                |               |                 |             |      |           |   |
|---------|-----------|------|----------|----------|---|---|---|---------|----------------|---------------|-----------------|-------------|------|-----------|---|
| Dt_chr9 | Cufflinks | exon | 14579640 | 14579848 | . | - | . | gene_id | "XLOC_234110"; | transcript_id | "Novel_003265"; | exon_number | "4"; | gene_type | " |
| Dt_chr9 | Cufflinks | exon | 17955760 | 17960043 | . | - | . | gene_id | "XLOC_234265"; | transcript_id | "Novel_003266"; | exon_number | "1"; | gene_type | " |
| Dt_chr9 | Cufflinks | exon | 17963902 | 17964260 | . | - | . | gene_id | "XLOC_234265"; | transcript_id | "Novel_003266"; | exon_number | "2"; | gene_type | " |
| Dt_chr9 | Cufflinks | exon | 17964368 | 17964721 | . | - | . | gene_id | "XLOC_234265"; | transcript_id | "Novel_003266"; | exon_number | "3"; | gene_type | " |
| Dt_chr9 | Cufflinks | exon | 17964962 | 17965219 | . | - | . | gene_id | "XLOC_234265"; | transcript_id | "Novel_003266"; | exon_number | "4"; | gene_type | " |
| Dt_chr9 | Cufflinks | exon | 17955799 | 17964260 | . | - | . | gene_id | "XLOC_234265"; | transcript_id | "Novel_003267"; | exon_number | "1"; | gene_type | " |
| Dt_chr9 | Cufflinks | exon | 17964339 | 17964721 | . | - | . | gene_id | "XLOC_234265"; | transcript_id | "Novel_003267"; | exon_number | "2"; | gene_type | " |
| Dt_chr9 | Cufflinks | exon | 17964962 | 17965223 | . | - | . | gene_id | "XLOC_234265"; | transcript_id | "Novel_003267"; | exon_number | "3"; | gene_type | " |
| Dt_chr9 | Cufflinks | exon | 19087511 | 19087861 | . | - | . | gene_id | "XLOC_234325"; | transcript_id | "Novel_003268"; | exon_number | "1"; | gene_type | " |
| Dt_chr9 | Cufflinks | exon | 19088738 | 19088868 | . | - | . | gene_id | "XLOC_234325"; | transcript_id | "Novel_003268"; | exon_number | "2"; | gene_type | " |
| Dt_chr9 | Cufflinks | exon | 19299828 | 19299948 | . | - | . | gene_id | "XLOC_234337"; | transcript_id | "Novel_003269"; | exon_number | "1"; | gene_type | " |
| Dt_chr9 | Cufflinks | exon | 19300466 | 19300563 | . | - | . | gene_id | "XLOC_234337"; | transcript_id | "Novel_003269"; | exon_number | "2"; | gene_type | " |
| Dt_chr9 | Cufflinks | exon | 22561772 | 22562048 | . | - | . | gene_id | "XLOC_234536"; | transcript_id | "Novel_003270"; | exon_number | "1"; | gene_type | " |
| Dt_chr9 | Cufflinks | exon | 25243294 | 25243560 | . | - | . | gene_id | "XLOC_234693"; | transcript_id | "Novel_003271"; | exon_number | "1"; | gene_type | " |
| Dt_chr9 | Cufflinks | exon | 25244302 | 25244587 | . | - | . | gene_id | "XLOC_234693"; | transcript_id | "Novel_003271"; | exon_number | "2"; | gene_type | " |
| Dt_chr9 | Cufflinks | exon | 25245296 | 25245490 | . | - | . | gene_id | "XLOC_234693"; | transcript_id | "Novel_003271"; | exon_number | "3"; | gene_type | " |
| Dt_chr9 | Cufflinks | exon | 25245637 | 25246083 | . | - | . | gene_id | "XLOC_234693"; | transcript_id | "Novel_003271"; | exon_number | "4"; | gene_type | " |
| Dt_chr9 | Cufflinks | exon | 25243295 | 25243560 | . | - | . | gene_id | "XLOC_234693"; | transcript_id | "Novel_003272"; | exon_number | "1"; | gene_type | " |
| Dt_chr9 | Cufflinks | exon | 25244302 | 25244587 | . | - | . | gene_id | "XLOC_234693"; | transcript_id | "Novel_003272"; | exon_number | "2"; | gene_type | " |
| Dt_chr9 | Cufflinks | exon | 25245296 | 25245540 | . | - | . | gene_id | "XLOC_234693"; | transcript_id | "Novel_003272"; | exon_number | "3"; | gene_type | " |
| Dt_chr9 | Cufflinks | exon | 25245637 | 25245979 | . | - | . | gene_id | "XLOC_234693"; | transcript_id | "Novel_003272"; | exon_number | "4"; | gene_type | " |
| Dt_chr9 | Cufflinks | exon | 25246110 | 25246229 | . | - | . | gene_id | "XLOC_234693"; | transcript_id | "Novel_003272"; | exon_number | "5"; | gene_type | " |
| Dt_chr9 | Cufflinks | exon | 25437305 | 25437847 | . | - | . | gene_id | "XLOC_234708"; | transcript_id | "Novel_003273"; | exon_number | "1"; | gene_type | " |
| Dt_chr9 | Cufflinks | exon | 25437975 | 25438068 | . | - | . | gene_id | "XLOC_234708"; | transcript_id | "Novel_003273"; | exon_number | "2"; | gene_type | " |
| Dt_chr9 | Cufflinks | exon | 27777868 | 27777981 | . | - | . | gene_id | "XLOC_234848"; | transcript_id | "Novel_003274"; | exon_number | "1"; | gene_type | " |
| Dt_chr9 | Cufflinks | exon | 27778586 | 27778762 | . | - | . | gene_id | "XLOC_234848"; | transcript_id | "Novel_003274"; | exon_number | "2"; | gene_type | " |
| Dt_chr9 | Cufflinks | exon | 28122123 | 28122822 | . | - | . | gene_id | "XLOC_234877"; | transcript_id | "Novel_003275"; | exon_number | "1"; | gene_type | " |
| Dt_chr9 | Cufflinks | exon | 28122930 | 28123661 | . | - | . | gene_id | "XLOC_234877"; | transcript_id | "Novel_003275"; | exon_number | "2"; | gene_type | " |
| Dt_chr9 | Cufflinks | exon | 28566123 | 28566366 | . | - | . | gene_id | "XLOC_234925"; | transcript_id | "Novel_003276"; | exon_number | "1"; | gene_type | " |
| Dt_chr9 | Cufflinks | exon | 29367747 | 29368306 | . | - | . | gene_id | "XLOC_234977"; | transcript_id | "Novel_003277"; | exon_number | "1"; | gene_type | " |
| Dt_chr9 | Cufflinks | exon | 29371866 | 29372023 | . | - | . | gene_id | "XLOC_234977"; | transcript_id | "Novel_003277"; | exon_number | "2"; | gene_type | " |
| Dt_chr9 | Cufflinks | exon | 29372113 | 29372708 | . | - | . | gene_id | "XLOC_234977"; | transcript_id | "Novel_003277"; | exon_number | "3"; | gene_type | " |
| Dt_chr9 | Cufflinks | exon | 31026354 | 31026867 | . | - | . | gene_id | "XLOC_235067"; | transcript_id | "Novel_003278"; | exon_number | "1"; | gene_type | " |
| Dt_chr9 | Cufflinks | exon | 31027672 | 31027706 | . | - | . | gene_id | "XLOC_235067"; | transcript_id | "Novel_003278"; | exon_number | "2"; | gene_type | " |
| Dt_chr9 | Cufflinks | exon | 31562382 | 31562766 | . | - | . | gene_id | "XLOC_235094"; | transcript_id | "Novel_003279"; | exon_number | "1"; | gene_type | " |



|         |           |      |          |          |   |   |   |         |                |               |                 |             |      |           |   |
|---------|-----------|------|----------|----------|---|---|---|---------|----------------|---------------|-----------------|-------------|------|-----------|---|
| Dt_chr9 | Cufflinks | exon | 33127106 | 33127196 | . | - | . | gene_id | "XLOC_235266"; | transcript_id | "Novel_003282"; | exon_number | "5"; | gene_type | " |
| Dt_chr9 | Cufflinks | exon | 33127280 | 33127389 | . | - | . | gene_id | "XLOC_235266"; | transcript_id | "Novel_003282"; | exon_number | "6"; | gene_type | " |
| Dt_chr9 | Cufflinks | exon | 33127661 | 33127770 | . | - | . | gene_id | "XLOC_235266"; | transcript_id | "Novel_003282"; | exon_number | "7"; | gene_type | " |
| Dt_chr9 | Cufflinks | exon | 33127890 | 33128187 | . | - | . | gene_id | "XLOC_235266"; | transcript_id | "Novel_003282"; | exon_number | "8"; | gene_type | " |
| Dt_chr9 | Cufflinks | exon | 33128299 | 33128437 | . | - | . | gene_id | "XLOC_235266"; | transcript_id | "Novel_003283"; | exon_number | "1"; | gene_type | " |
| Dt_chr9 | Cufflinks | exon | 33128553 | 33128677 | . | - | . | gene_id | "XLOC_235266"; | transcript_id | "Novel_003283"; | exon_number | "2"; | gene_type | " |
| Dt_chr9 | Cufflinks | exon | 33128795 | 33128865 | . | - | . | gene_id | "XLOC_235266"; | transcript_id | "Novel_003283"; | exon_number | "3"; | gene_type | " |
| Dt_chr9 | Cufflinks | exon | 33128966 | 33129133 | . | - | . | gene_id | "XLOC_235266"; | transcript_id | "Novel_003283"; | exon_number | "4"; | gene_type | " |
| Dt_chr9 | Cufflinks | exon | 38752441 | 38752955 | . | - | . | gene_id | "XLOC_235838"; | transcript_id | "Novel_003284"; | exon_number | "1"; | gene_type | " |
| Dt_chr9 | Cufflinks | exon | 38753113 | 38753224 | . | - | . | gene_id | "XLOC_235838"; | transcript_id | "Novel_003284"; | exon_number | "2"; | gene_type | " |
| Dt_chr9 | Cufflinks | exon | 41134863 | 41135076 | . | - | . | gene_id | "XLOC_236128"; | transcript_id | "Novel_003285"; | exon_number | "1"; | gene_type | " |
| Dt_chr9 | Cufflinks | exon | 41135176 | 41135242 | . | - | . | gene_id | "XLOC_236128"; | transcript_id | "Novel_003285"; | exon_number | "2"; | gene_type | " |
| Dt_chr9 | Cufflinks | exon | 41135881 | 41135983 | . | - | . | gene_id | "XLOC_236128"; | transcript_id | "Novel_003285"; | exon_number | "3"; | gene_type | " |
| Dt_chr9 | Cufflinks | exon | 41136297 | 41136383 | . | - | . | gene_id | "XLOC_236128"; | transcript_id | "Novel_003285"; | exon_number | "4"; | gene_type | " |
| Dt_chr9 | Cufflinks | exon | 41136486 | 41136711 | . | - | . | gene_id | "XLOC_236128"; | transcript_id | "Novel_003285"; | exon_number | "5"; | gene_type | " |
| Dt_chr9 | Cufflinks | exon | 41456695 | 41457542 | . | - | . | gene_id | "XLOC_236188"; | transcript_id | "Novel_003286"; | exon_number | "1"; | gene_type | " |
| Dt_chr9 | Cufflinks | exon | 42413637 | 42414198 | . | - | . | gene_id | "XLOC_236339"; | transcript_id | "Novel_003287"; | exon_number | "1"; | gene_type | " |
| Dt_chr9 | Cufflinks | exon | 42418097 | 42418243 | . | - | . | gene_id | "XLOC_236339"; | transcript_id | "Novel_003287"; | exon_number | "2"; | gene_type | " |
| Dt_chr9 | Cufflinks | exon | 42418329 | 42418382 | . | - | . | gene_id | "XLOC_236339"; | transcript_id | "Novel_003287"; | exon_number | "3"; | gene_type | " |
| Dt_chr9 | Cufflinks | exon | 42418676 | 42418840 | . | - | . | gene_id | "XLOC_236339"; | transcript_id | "Novel_003287"; | exon_number | "4"; | gene_type | " |
| Dt_chr9 | Cufflinks | exon | 42419323 | 42419535 | . | - | . | gene_id | "XLOC_236339"; | transcript_id | "Novel_003287"; | exon_number | "5"; | gene_type | " |
| Dt_chr9 | Cufflinks | exon | 42419653 | 42419739 | . | - | . | gene_id | "XLOC_236339"; | transcript_id | "Novel_003287"; | exon_number | "6"; | gene_type | " |
| Dt_chr9 | Cufflinks | exon | 42419827 | 42420445 | . | - | . | gene_id | "XLOC_236339"; | transcript_id | "Novel_003287"; | exon_number | "7"; | gene_type | " |
| Dt_chr9 | Cufflinks | exon | 45675313 | 45678017 | . | - | . | gene_id | "XLOC_236639"; | transcript_id | "Novel_003288"; | exon_number | "1"; | gene_type | " |
| Dt_chr9 | Cufflinks | exon | 45679058 | 45679330 | . | - | . | gene_id | "XLOC_236639"; | transcript_id | "Novel_003288"; | exon_number | "2"; | gene_type | " |
| Dt_chr9 | Cufflinks | exon | 46541626 | 46542332 | . | - | . | gene_id | "XLOC_236744"; | transcript_id | "Novel_003289"; | exon_number | "1"; | gene_type | " |
| Dt_chr9 | Cufflinks | exon | 46543537 | 46544039 | . | - | . | gene_id | "XLOC_236744"; | transcript_id | "Novel_003289"; | exon_number | "2"; | gene_type | " |
| Dt_chr9 | Cufflinks | exon | 46575436 | 46575491 | . | - | . | gene_id | "XLOC_236749"; | transcript_id | "Novel_003290"; | exon_number | "1"; | gene_type | " |
| Dt_chr9 | Cufflinks | exon | 46575620 | 46575712 | . | - | . | gene_id | "XLOC_236749"; | transcript_id | "Novel_003290"; | exon_number | "2"; | gene_type | " |
| Dt_chr9 | Cufflinks | exon | 46575804 | 46576514 | . | - | . | gene_id | "XLOC_236749"; | transcript_id | "Novel_003290"; | exon_number | "3"; | gene_type | " |
| Dt_chr9 | Cufflinks | exon | 46641125 | 46644146 | . | - | . | gene_id | "XLOC_236756"; | transcript_id | "Novel_003291"; | exon_number | "1"; | gene_type | " |
| Dt_chr9 | Cufflinks | exon | 46644245 | 46644401 | . | - | . | gene_id | "XLOC_236756"; | transcript_id | "Novel_003291"; | exon_number | "2"; | gene_type | " |
| Dt_chr9 | Cufflinks | exon | 46644694 | 46644817 | . | - | . | gene_id | "XLOC_236756"; | transcript_id | "Novel_003291"; | exon_number | "3"; | gene_type | " |
| Dt_chr9 | Cufflinks | exon | 46777948 | 46778287 | . | - | . | gene_id | "XLOC_236778"; | transcript_id | "Novel_003292"; | exon_number | "1"; | gene_type | " |
| Dt_chr9 | Cufflinks | exon | 46778494 | 46778566 | . | - | . | gene_id | "XLOC_236778"; | transcript_id | "Novel_003292"; | exon_number | "2"; | gene_type | " |



|         |           |      |          |          |   |   |         |                |               |                 |             |       |           |   |
|---------|-----------|------|----------|----------|---|---|---------|----------------|---------------|-----------------|-------------|-------|-----------|---|
| Dt_chr9 | Cufflinks | exon | 47704633 | 47704776 | . | . | gene_id | "XLOC_236906"; | transcript_id | "Novel_003299"; | exon_number | "6";  | gene_type | " |
| Dt_chr9 | Cufflinks | exon | 47705288 | 47705384 | . | . | gene_id | "XLOC_236906"; | transcript_id | "Novel_003299"; | exon_number | "7";  | gene_type | " |
| Dt_chr9 | Cufflinks | exon | 47705536 | 47705634 | . | . | gene_id | "XLOC_236906"; | transcript_id | "Novel_003299"; | exon_number | "8";  | gene_type | " |
| Dt_chr9 | Cufflinks | exon | 47705960 | 47706082 | . | . | gene_id | "XLOC_236906"; | transcript_id | "Novel_003299"; | exon_number | "9";  | gene_type | " |
| Dt_chr9 | Cufflinks | exon | 47706190 | 47706932 | . | . | gene_id | "XLOC_236906"; | transcript_id | "Novel_003299"; | exon_number | "10"; | gene_type | " |
| Dt_chr9 | Cufflinks | exon | 47701561 | 47701811 | . | . | gene_id | "XLOC_236906"; | transcript_id | "Novel_003300"; | exon_number | "1";  | gene_type | " |
| Dt_chr9 | Cufflinks | exon | 47701881 | 47701947 | . | . | gene_id | "XLOC_236906"; | transcript_id | "Novel_003300"; | exon_number | "2";  | gene_type | " |
| Dt_chr9 | Cufflinks | exon | 47702374 | 47702452 | . | . | gene_id | "XLOC_236906"; | transcript_id | "Novel_003300"; | exon_number | "3";  | gene_type | " |
| Dt_chr9 | Cufflinks | exon | 47702618 | 47703156 | . | . | gene_id | "XLOC_236906"; | transcript_id | "Novel_003300"; | exon_number | "4";  | gene_type | " |
| Dt_chr9 | Cufflinks | exon | 47703895 | 47704002 | . | . | gene_id | "XLOC_236906"; | transcript_id | "Novel_003300"; | exon_number | "5";  | gene_type | " |
| Dt_chr9 | Cufflinks | exon | 47704091 | 47704159 | . | . | gene_id | "XLOC_236906"; | transcript_id | "Novel_003300"; | exon_number | "6";  | gene_type | " |
| Dt_chr9 | Cufflinks | exon | 47704489 | 47704554 | . | . | gene_id | "XLOC_236906"; | transcript_id | "Novel_003300"; | exon_number | "7";  | gene_type | " |
| Dt_chr9 | Cufflinks | exon | 47704633 | 47704776 | . | . | gene_id | "XLOC_236906"; | transcript_id | "Novel_003300"; | exon_number | "8";  | gene_type | " |
| Dt_chr9 | Cufflinks | exon | 47705288 | 47705384 | . | . | gene_id | "XLOC_236906"; | transcript_id | "Novel_003300"; | exon_number | "9";  | gene_type | " |
| Dt_chr9 | Cufflinks | exon | 47705536 | 47705634 | . | . | gene_id | "XLOC_236906"; | transcript_id | "Novel_003300"; | exon_number | "10"; | gene_type | " |
| Dt_chr9 | Cufflinks | exon | 47705960 | 47706082 | . | . | gene_id | "XLOC_236906"; | transcript_id | "Novel_003300"; | exon_number | "11"; | gene_type | " |
| Dt_chr9 | Cufflinks | exon | 47706190 | 47706958 | . | . | gene_id | "XLOC_236906"; | transcript_id | "Novel_003300"; | exon_number | "12"; | gene_type | " |
| Dt_chr9 | Cufflinks | exon | 47705042 | 47705384 | . | . | gene_id | "XLOC_236906"; | transcript_id | "Novel_003301"; | exon_number | "1";  | gene_type | " |
| Dt_chr9 | Cufflinks | exon | 47705536 | 47705634 | . | . | gene_id | "XLOC_236906"; | transcript_id | "Novel_003301"; | exon_number | "2";  | gene_type | " |
| Dt_chr9 | Cufflinks | exon | 47705960 | 47706082 | . | . | gene_id | "XLOC_236906"; | transcript_id | "Novel_003301"; | exon_number | "3";  | gene_type | " |
| Dt_chr9 | Cufflinks | exon | 47706190 | 47706932 | . | . | gene_id | "XLOC_236906"; | transcript_id | "Novel_003301"; | exon_number | "4";  | gene_type | " |
| Dt_chr9 | Cufflinks | exon | 47714261 | 47714558 | . | . | gene_id | "XLOC_236908"; | transcript_id | "Novel_003302"; | exon_number | "1";  | gene_type | " |
| Dt_chr9 | Cufflinks | exon | 47714882 | 47714976 | . | . | gene_id | "XLOC_236908"; | transcript_id | "Novel_003302"; | exon_number | "2";  | gene_type | " |
| Dt_chr9 | Cufflinks | exon | 47715272 | 47715303 | . | . | gene_id | "XLOC_236908"; | transcript_id | "Novel_003302"; | exon_number | "3";  | gene_type | " |
| Dt_chr9 | Cufflinks | exon | 47715530 | 47715591 | . | . | gene_id | "XLOC_236908"; | transcript_id | "Novel_003302"; | exon_number | "4";  | gene_type | " |
| Dt_chr9 | Cufflinks | exon | 47715760 | 47715875 | . | . | gene_id | "XLOC_236908"; | transcript_id | "Novel_003302"; | exon_number | "5";  | gene_type | " |
| Dt_chr9 | Cufflinks | exon | 47715982 | 47716218 | . | . | gene_id | "XLOC_236908"; | transcript_id | "Novel_003302"; | exon_number | "6";  | gene_type | " |
| Dt_chr9 | Cufflinks | exon | 47714316 | 47714558 | . | . | gene_id | "XLOC_236908"; | transcript_id | "Novel_003303"; | exon_number | "1";  | gene_type | " |
| Dt_chr9 | Cufflinks | exon | 47714882 | 47715149 | . | . | gene_id | "XLOC_236908"; | transcript_id | "Novel_003303"; | exon_number | "2";  | gene_type | " |
| Dt_chr9 | Cufflinks | exon | 47787930 | 47788424 | . | . | gene_id | "XLOC_236919"; | transcript_id | "Novel_003304"; | exon_number | "1";  | gene_type | " |
| Dt_chr9 | Cufflinks | exon | 47789538 | 47790438 | . | . | gene_id | "XLOC_236919"; | transcript_id | "Novel_003304"; | exon_number | "2";  | gene_type | " |
| Dt_chr9 | Cufflinks | exon | 47790545 | 47790674 | . | . | gene_id | "XLOC_236919"; | transcript_id | "Novel_003304"; | exon_number | "3";  | gene_type | " |
| Dt_chr9 | Cufflinks | exon | 47788015 | 47788424 | . | . | gene_id | "XLOC_236919"; | transcript_id | "Novel_003305"; | exon_number | "1";  | gene_type | " |
| Dt_chr9 | Cufflinks | exon | 47789538 | 47790708 | . | . | gene_id | "XLOC_236919"; | transcript_id | "Novel_003305"; | exon_number | "2";  | gene_type | " |
| Dt_chr9 | Cufflinks | exon | 47818400 | 47818998 | . | . | gene_id | "XLOC_236927"; | transcript_id | "Novel_003306"; | exon_number | "1";  | gene_type | " |





|         |           |      |          |          |   |   |   |         |                |               |                 |             |      |           |   |
|---------|-----------|------|----------|----------|---|---|---|---------|----------------|---------------|-----------------|-------------|------|-----------|---|
| Dt_chr9 | Cufflinks | exon | 47943541 | 47943693 | . | - | . | gene_id | "XLOC_236945"; | transcript_id | "Novel_003313"; | exon_number | "5"; | gene_type | " |
| Dt_chr9 | Cufflinks | exon | 47941121 | 47941161 | . | - | . | gene_id | "XLOC_236945"; | transcript_id | "Novel_003314"; | exon_number | "1"; | gene_type | " |
| Dt_chr9 | Cufflinks | exon | 47941264 | 47941353 | . | - | . | gene_id | "XLOC_236945"; | transcript_id | "Novel_003314"; | exon_number | "2"; | gene_type | " |
| Dt_chr9 | Cufflinks | exon | 47941850 | 47941962 | . | - | . | gene_id | "XLOC_236945"; | transcript_id | "Novel_003314"; | exon_number | "3"; | gene_type | " |
| Dt_chr9 | Cufflinks | exon | 48018876 | 48019516 | . | - | . | gene_id | "XLOC_236968"; | transcript_id | "Novel_003315"; | exon_number | "1"; | gene_type | " |
| Dt_chr9 | Cufflinks | exon | 48019603 | 48019933 | . | - | . | gene_id | "XLOC_236968"; | transcript_id | "Novel_003315"; | exon_number | "2"; | gene_type | " |
| Dt_chr9 | Cufflinks | exon | 48019012 | 48019516 | . | - | . | gene_id | "XLOC_236968"; | transcript_id | "Novel_003316"; | exon_number | "1"; | gene_type | " |
| Dt_chr9 | Cufflinks | exon | 48019603 | 48019719 | . | - | . | gene_id | "XLOC_236968"; | transcript_id | "Novel_003316"; | exon_number | "2"; | gene_type | " |
| Dt_chr9 | Cufflinks | exon | 48019814 | 48020155 | . | - | . | gene_id | "XLOC_236968"; | transcript_id | "Novel_003316"; | exon_number | "3"; | gene_type | " |
| Dt_chr9 | Cufflinks | exon | 48048473 | 48048499 | . | - | . | gene_id | "XLOC_236974"; | transcript_id | "Novel_003317"; | exon_number | "1"; | gene_type | " |
| Dt_chr9 | Cufflinks | exon | 48048607 | 48048691 | . | - | . | gene_id | "XLOC_236974"; | transcript_id | "Novel_003317"; | exon_number | "2"; | gene_type | " |
| Dt_chr9 | Cufflinks | exon | 48049227 | 48049487 | . | - | . | gene_id | "XLOC_236974"; | transcript_id | "Novel_003317"; | exon_number | "3"; | gene_type | " |
| Dt_chr9 | Cufflinks | exon | 48049605 | 48050131 | . | - | . | gene_id | "XLOC_236974"; | transcript_id | "Novel_003317"; | exon_number | "4"; | gene_type | " |
| Dt_chr9 | Cufflinks | exon | 48177150 | 48178003 | . | - | . | gene_id | "XLOC_237006"; | transcript_id | "Novel_003318"; | exon_number | "1"; | gene_type | " |
| Dt_chr9 | Cufflinks | exon | 48178839 | 48179115 | . | - | . | gene_id | "XLOC_237006"; | transcript_id | "Novel_003318"; | exon_number | "2"; | gene_type | " |
| Dt_chr9 | Cufflinks | exon | 48179210 | 48179449 | . | - | . | gene_id | "XLOC_237006"; | transcript_id | "Novel_003318"; | exon_number | "3"; | gene_type | " |
| Dt_chr9 | Cufflinks | exon | 48180193 | 48180289 | . | - | . | gene_id | "XLOC_237006"; | transcript_id | "Novel_003318"; | exon_number | "4"; | gene_type | " |
| Dt_chr9 | Cufflinks | exon | 48180396 | 48180803 | . | - | . | gene_id | "XLOC_237006"; | transcript_id | "Novel_003318"; | exon_number | "5"; | gene_type | " |
| Dt_chr9 | Cufflinks | exon | 48177413 | 48178003 | . | - | . | gene_id | "XLOC_237006"; | transcript_id | "Novel_003319"; | exon_number | "1"; | gene_type | " |
| Dt_chr9 | Cufflinks | exon | 48178839 | 48179449 | . | - | . | gene_id | "XLOC_237006"; | transcript_id | "Novel_003319"; | exon_number | "2"; | gene_type | " |
| Dt_chr9 | Cufflinks | exon | 48180193 | 48180289 | . | - | . | gene_id | "XLOC_237006"; | transcript_id | "Novel_003319"; | exon_number | "3"; | gene_type | " |
| Dt_chr9 | Cufflinks | exon | 48180396 | 48180802 | . | - | . | gene_id | "XLOC_237006"; | transcript_id | "Novel_003319"; | exon_number | "4"; | gene_type | " |
| Dt_chr9 | Cufflinks | exon | 48305506 | 48305646 | . | - | . | gene_id | "XLOC_237024"; | transcript_id | "Novel_003320"; | exon_number | "1"; | gene_type | " |
| Dt_chr9 | Cufflinks | exon | 48305989 | 48307016 | . | - | . | gene_id | "XLOC_237024"; | transcript_id | "Novel_003320"; | exon_number | "2"; | gene_type | " |
| Dt_chr9 | Cufflinks | exon | 48383922 | 48385227 | . | - | . | gene_id | "XLOC_237043"; | transcript_id | "Novel_003321"; | exon_number | "1"; | gene_type | " |
| Dt_chr9 | Cufflinks | exon | 48385553 | 48385722 | . | - | . | gene_id | "XLOC_237043"; | transcript_id | "Novel_003321"; | exon_number | "2"; | gene_type | " |
| Dt_chr9 | Cufflinks | exon | 48384304 | 48384377 | . | - | . | gene_id | "XLOC_237043"; | transcript_id | "Novel_003322"; | exon_number | "1"; | gene_type | " |
| Dt_chr9 | Cufflinks | exon | 48384524 | 48385227 | . | - | . | gene_id | "XLOC_237043"; | transcript_id | "Novel_003322"; | exon_number | "2"; | gene_type | " |
| Dt_chr9 | Cufflinks | exon | 48385553 | 48385731 | . | - | . | gene_id | "XLOC_237043"; | transcript_id | "Novel_003322"; | exon_number | "3"; | gene_type | " |
| Dt_chr9 | Cufflinks | exon | 48384341 | 48384377 | . | - | . | gene_id | "XLOC_237043"; | transcript_id | "Novel_003323"; | exon_number | "1"; | gene_type | " |
| Dt_chr9 | Cufflinks | exon | 48384524 | 48385626 | . | - | . | gene_id | "XLOC_237043"; | transcript_id | "Novel_003323"; | exon_number | "2"; | gene_type | " |
| Dt_chr9 | Cufflinks | exon | 48988501 | 48989157 | . | - | . | gene_id | "XLOC_237099"; | transcript_id | "Novel_003324"; | exon_number | "1"; | gene_type | " |
| Dt_chr9 | Cufflinks | exon | 48989272 | 48989329 | . | - | . | gene_id | "XLOC_237099"; | transcript_id | "Novel_003324"; | exon_number | "2"; | gene_type | " |
| Dt_chr9 | Cufflinks | exon | 48989935 | 48989971 | . | - | . | gene_id | "XLOC_237099"; | transcript_id | "Novel_003324"; | exon_number | "3"; | gene_type | " |
| Dt_chr9 | Cufflinks | exon | 48990096 | 48990895 | . | - | . | gene_id | "XLOC_237099"; | transcript_id | "Novel_003324"; | exon_number | "4"; | gene_type | " |

|         |           |      |          |          |   |   |         |                |               |                 |             |      |           |   |
|---------|-----------|------|----------|----------|---|---|---------|----------------|---------------|-----------------|-------------|------|-----------|---|
| Dt_chr9 | Cufflinks | exon | 48991426 | 48991467 | . | . | gene_id | "XLOC_237099"; | transcript_id | "Novel_003324"; | exon_number | "5"; | gene_type | " |
| Dt_chr9 | Cufflinks | exon | 48991696 | 48992089 | . | . | gene_id | "XLOC_237099"; | transcript_id | "Novel_003324"; | exon_number | "6"; | gene_type | " |
| Dt_chr9 | Cufflinks | exon | 50233780 | 50236428 | . | . | gene_id | "XLOC_237268"; | transcript_id | "Novel_003325"; | exon_number | "1"; | gene_type | " |
| Dt_chr9 | Cufflinks | exon | 50237560 | 50237608 | . | . | gene_id | "XLOC_237268"; | transcript_id | "Novel_003325"; | exon_number | "2"; | gene_type | " |
| Dt_chr9 | Cufflinks | exon | 50238601 | 50238798 | . | . | gene_id | "XLOC_237268"; | transcript_id | "Novel_003325"; | exon_number | "3"; | gene_type | " |
| Dt_chr9 | Cufflinks | exon | 50267478 | 50268375 | . | . | gene_id | "XLOC_237273"; | transcript_id | "Novel_003326"; | exon_number | "1"; | gene_type | " |
| Dt_chr9 | Cufflinks | exon | 50590644 | 50590906 | . | . | gene_id | "XLOC_237316"; | transcript_id | "Novel_003327"; | exon_number | "1"; | gene_type | " |
| Dt_chr9 | Cufflinks | exon | 50591012 | 50591138 | . | . | gene_id | "XLOC_237316"; | transcript_id | "Novel_003327"; | exon_number | "2"; | gene_type | " |
| Dt_chr9 | Cufflinks | exon | 50591227 | 50591382 | . | . | gene_id | "XLOC_237316"; | transcript_id | "Novel_003327"; | exon_number | "3"; | gene_type | " |
| Dt_chr9 | Cufflinks | exon | 50592114 | 50592305 | . | . | gene_id | "XLOC_237316"; | transcript_id | "Novel_003327"; | exon_number | "4"; | gene_type | " |
| Dt_chr9 | Cufflinks | exon | 53056622 | 53057278 | . | . | gene_id | "XLOC_237794"; | transcript_id | "Novel_003328"; | exon_number | "1"; | gene_type | " |
| Dt_chr9 | Cufflinks | exon | 53057906 | 53057993 | . | . | gene_id | "XLOC_237794"; | transcript_id | "Novel_003328"; | exon_number | "2"; | gene_type | " |
| Dt_chr9 | Cufflinks | exon | 53058223 | 53058630 | . | . | gene_id | "XLOC_237794"; | transcript_id | "Novel_003328"; | exon_number | "3"; | gene_type | " |
| Dt_chr9 | Cufflinks | exon | 53056764 | 53057278 | . | . | gene_id | "XLOC_237794"; | transcript_id | "Novel_003329"; | exon_number | "1"; | gene_type | " |
| Dt_chr9 | Cufflinks | exon | 53057906 | 53057993 | . | . | gene_id | "XLOC_237794"; | transcript_id | "Novel_003329"; | exon_number | "2"; | gene_type | " |
| Dt_chr9 | Cufflinks | exon | 53058223 | 53058410 | . | . | gene_id | "XLOC_237794"; | transcript_id | "Novel_003329"; | exon_number | "3"; | gene_type | " |
| Dt_chr9 | Cufflinks | exon | 53058559 | 53059043 | . | . | gene_id | "XLOC_237794"; | transcript_id | "Novel_003329"; | exon_number | "4"; | gene_type | " |
| Dt_chr9 | Cufflinks | exon | 53059103 | 53059464 | . | . | gene_id | "XLOC_237794"; | transcript_id | "Novel_003330"; | exon_number | "1"; | gene_type | " |
| Dt_chr9 | Cufflinks | exon | 53059925 | 53060390 | . | . | gene_id | "XLOC_237794"; | transcript_id | "Novel_003330"; | exon_number | "2"; | gene_type | " |
| Dt_chr9 | Cufflinks | exon | 53059609 | 53060009 | . | . | gene_id | "XLOC_237794"; | transcript_id | "Novel_003331"; | exon_number | "1"; | gene_type | " |
| Dt_chr9 | Cufflinks | exon | 53060087 | 53060390 | . | . | gene_id | "XLOC_237794"; | transcript_id | "Novel_003331"; | exon_number | "2"; | gene_type | " |
| Dt_chr9 | Cufflinks | exon | 53850654 | 53850678 | . | . | gene_id | "XLOC_237944"; | transcript_id | "Novel_003332"; | exon_number | "1"; | gene_type | " |
| Dt_chr9 | Cufflinks | exon | 53850760 | 53851118 | . | . | gene_id | "XLOC_237944"; | transcript_id | "Novel_003332"; | exon_number | "2"; | gene_type | " |
| Dt_chr9 | Cufflinks | exon | 53851749 | 53851847 | . | . | gene_id | "XLOC_237944"; | transcript_id | "Novel_003332"; | exon_number | "3"; | gene_type | " |
| Dt_chr9 | Cufflinks | exon | 53852007 | 53852169 | . | . | gene_id | "XLOC_237944"; | transcript_id | "Novel_003332"; | exon_number | "4"; | gene_type | " |
| Dt_chr9 | Cufflinks | exon | 53852278 | 53852356 | . | . | gene_id | "XLOC_237944"; | transcript_id | "Novel_003332"; | exon_number | "5"; | gene_type | " |
| Dt_chr9 | Cufflinks | exon | 53852561 | 53853926 | . | . | gene_id | "XLOC_237944"; | transcript_id | "Novel_003332"; | exon_number | "6"; | gene_type | " |
| Dt_chr9 | Cufflinks | exon | 53850654 | 53850665 | . | . | gene_id | "XLOC_237944"; | transcript_id | "Novel_003333"; | exon_number | "1"; | gene_type | " |
| Dt_chr9 | Cufflinks | exon | 53850760 | 53851118 | . | . | gene_id | "XLOC_237944"; | transcript_id | "Novel_003333"; | exon_number | "2"; | gene_type | " |
| Dt_chr9 | Cufflinks | exon | 53851749 | 53851847 | . | . | gene_id | "XLOC_237944"; | transcript_id | "Novel_003333"; | exon_number | "3"; | gene_type | " |
| Dt_chr9 | Cufflinks | exon | 53852007 | 53852169 | . | . | gene_id | "XLOC_237944"; | transcript_id | "Novel_003333"; | exon_number | "4"; | gene_type | " |
| Dt_chr9 | Cufflinks | exon | 53852278 | 53852356 | . | . | gene_id | "XLOC_237944"; | transcript_id | "Novel_003333"; | exon_number | "5"; | gene_type | " |
| Dt_chr9 | Cufflinks | exon | 53852561 | 53853926 | . | . | gene_id | "XLOC_237944"; | transcript_id | "Novel_003333"; | exon_number | "6"; | gene_type | " |
| Dt_chr9 | Cufflinks | exon | 53850654 | 53851118 | . | . | gene_id | "XLOC_237944"; | transcript_id | "Novel_003334"; | exon_number | "1"; | gene_type | " |
| Dt_chr9 | Cufflinks | exon | 53851749 | 53851847 | . | . | gene_id | "XLOC_237944"; | transcript_id | "Novel_003334"; | exon_number | "2"; | gene_type | " |







|         |           |      |          |          |   |   |   |         |                |               |                 |             |      |           |   |
|---------|-----------|------|----------|----------|---|---|---|---------|----------------|---------------|-----------------|-------------|------|-----------|---|
| Dt_chr9 | Cufflinks | exon | 61542045 | 61543196 | . | - | . | gene_id | "XLOC_239276"; | transcript_id | "Novel_003361"; | exon_number | "1"; | gene_type | " |
| Dt_chr9 | Cufflinks | exon | 61544908 | 61544953 | . | - | . | gene_id | "XLOC_239276"; | transcript_id | "Novel_003361"; | exon_number | "2"; | gene_type | " |
| Dt_chr9 | Cufflinks | exon | 61545083 | 61545417 | . | - | . | gene_id | "XLOC_239276"; | transcript_id | "Novel_003361"; | exon_number | "3"; | gene_type | " |
| Dt_chr9 | Cufflinks | exon | 61542152 | 61543196 | . | - | . | gene_id | "XLOC_239276"; | transcript_id | "Novel_003362"; | exon_number | "1"; | gene_type | " |
| Dt_chr9 | Cufflinks | exon | 61544908 | 61544953 | . | - | . | gene_id | "XLOC_239276"; | transcript_id | "Novel_003362"; | exon_number | "2"; | gene_type | " |
| Dt_chr9 | Cufflinks | exon | 61545133 | 61545261 | . | - | . | gene_id | "XLOC_239276"; | transcript_id | "Novel_003362"; | exon_number | "3"; | gene_type | " |
| Dt_chr9 | Cufflinks | exon | 61545338 | 61545422 | . | - | . | gene_id | "XLOC_239276"; | transcript_id | "Novel_003362"; | exon_number | "4"; | gene_type | " |
| Dt_chr9 | Cufflinks | exon | 61760724 | 61761235 | . | - | . | gene_id | "XLOC_239317"; | transcript_id | "Novel_003363"; | exon_number | "1"; | gene_type | " |
| Dt_chr9 | Cufflinks | exon | 61761425 | 61761627 | . | - | . | gene_id | "XLOC_239317"; | transcript_id | "Novel_003363"; | exon_number | "2"; | gene_type | " |
| Dt_chr9 | Cufflinks | exon | 61761809 | 61761916 | . | - | . | gene_id | "XLOC_239317"; | transcript_id | "Novel_003363"; | exon_number | "3"; | gene_type | " |
| Dt_chr9 | Cufflinks | exon | 61760724 | 61761627 | . | - | . | gene_id | "XLOC_239317"; | transcript_id | "Novel_003364"; | exon_number | "1"; | gene_type | " |
| Dt_chr9 | Cufflinks | exon | 61761809 | 61761916 | . | - | . | gene_id | "XLOC_239317"; | transcript_id | "Novel_003364"; | exon_number | "2"; | gene_type | " |
| Dt_chr9 | Cufflinks | exon | 64151679 | 64152213 | . | - | . | gene_id | "XLOC_239804"; | transcript_id | "Novel_003365"; | exon_number | "1"; | gene_type | " |
| Dt_chr9 | Cufflinks | exon | 64152466 | 64153189 | . | - | . | gene_id | "XLOC_239804"; | transcript_id | "Novel_003365"; | exon_number | "2"; | gene_type | " |
| Dt_chr9 | Cufflinks | exon | 64245306 | 64246097 | . | - | . | gene_id | "XLOC_239818"; | transcript_id | "Novel_003366"; | exon_number | "1"; | gene_type | " |
| Dt_chr9 | Cufflinks | exon | 64246324 | 64246412 | . | - | . | gene_id | "XLOC_239818"; | transcript_id | "Novel_003366"; | exon_number | "2"; | gene_type | " |
| Dt_chr9 | Cufflinks | exon | 64246503 | 64246955 | . | - | . | gene_id | "XLOC_239818"; | transcript_id | "Novel_003366"; | exon_number | "3"; | gene_type | " |
| Dt_chr9 | Cufflinks | exon | 64434052 | 64434455 | . | - | . | gene_id | "XLOC_239849"; | transcript_id | "Novel_003367"; | exon_number | "1"; | gene_type | " |
| Dt_chr9 | Cufflinks | exon | 64434555 | 64435191 | . | - | . | gene_id | "XLOC_239849"; | transcript_id | "Novel_003367"; | exon_number | "2"; | gene_type | " |
| Dt_chr9 | Cufflinks | exon | 64910195 | 64911099 | . | - | . | gene_id | "XLOC_239951"; | transcript_id | "Novel_003368"; | exon_number | "1"; | gene_type | " |
| Dt_chr9 | Cufflinks | exon | 64911424 | 64911778 | . | - | . | gene_id | "XLOC_239951"; | transcript_id | "Novel_003368"; | exon_number | "2"; | gene_type | " |
| Dt_chr9 | Cufflinks | exon | 64911896 | 64911991 | . | - | . | gene_id | "XLOC_239951"; | transcript_id | "Novel_003368"; | exon_number | "3"; | gene_type | " |
| Dt_chr9 | Cufflinks | exon | 64912117 | 64912177 | . | - | . | gene_id | "XLOC_239951"; | transcript_id | "Novel_003368"; | exon_number | "4"; | gene_type | " |
| Dt_chr9 | Cufflinks | exon | 64912297 | 64912488 | . | - | . | gene_id | "XLOC_239951"; | transcript_id | "Novel_003368"; | exon_number | "5"; | gene_type | " |
| Dt_chr9 | Cufflinks | exon | 65639890 | 65640099 | . | - | . | gene_id | "XLOC_240080"; | transcript_id | "Novel_003369"; | exon_number | "1"; | gene_type | " |
| Dt_chr9 | Cufflinks | exon | 65640674 | 65640754 | . | - | . | gene_id | "XLOC_240080"; | transcript_id | "Novel_003369"; | exon_number | "2"; | gene_type | " |
| Dt_chr9 | Cufflinks | exon | 67865770 | 67866609 | . | - | . | gene_id | "XLOC_240489"; | transcript_id | "Novel_003370"; | exon_number | "1"; | gene_type | " |
| Dt_chr9 | Cufflinks | exon | 67867667 | 67867793 | . | - | . | gene_id | "XLOC_240489"; | transcript_id | "Novel_003370"; | exon_number | "2"; | gene_type | " |
| Dt_chr9 | Cufflinks | exon | 67868345 | 67868803 | . | - | . | gene_id | "XLOC_240489"; | transcript_id | "Novel_003370"; | exon_number | "3"; | gene_type | " |
| Dt_chr9 | Cufflinks | exon | 67867039 | 67867793 | . | - | . | gene_id | "XLOC_240489"; | transcript_id | "Novel_003371"; | exon_number | "1"; | gene_type | " |
| Dt_chr9 | Cufflinks | exon | 67868345 | 67868803 | . | - | . | gene_id | "XLOC_240489"; | transcript_id | "Novel_003371"; | exon_number | "2"; | gene_type | " |
| Dt_chr9 | Cufflinks | exon | 68136385 | 68136773 | . | - | . | gene_id | "XLOC_240515"; | transcript_id | "Novel_003372"; | exon_number | "1"; | gene_type | " |
| Dt_chr9 | Cufflinks | exon | 68137576 | 68137740 | . | - | . | gene_id | "XLOC_240515"; | transcript_id | "Novel_003372"; | exon_number | "2"; | gene_type | " |
| Dt_chr9 | Cufflinks | exon | 68138375 | 68138503 | . | - | . | gene_id | "XLOC_240515"; | transcript_id | "Novel_003372"; | exon_number | "3"; | gene_type | " |
| Dt_chr9 | Cufflinks | exon | 68139499 | 68139594 | . | - | . | gene_id | "XLOC_240515"; | transcript_id | "Novel_003372"; | exon_number | "4"; | gene_type | " |

|         |           |      |          |          |   |   |   |         |                |               |                 |             |       |           |   |
|---------|-----------|------|----------|----------|---|---|---|---------|----------------|---------------|-----------------|-------------|-------|-----------|---|
| Dt_chr9 | Cufflinks | exon | 68139704 | 68139760 | . | - | . | gene_id | "XLOC_240515"; | transcript_id | "Novel_003372"; | exon_number | "5";  | gene_type | " |
| Dt_chr9 | Cufflinks | exon | 68139848 | 68139991 | . | - | . | gene_id | "XLOC_240515"; | transcript_id | "Novel_003372"; | exon_number | "6";  | gene_type | " |
| Dt_chr9 | Cufflinks | exon | 68145530 | 68145604 | . | - | . | gene_id | "XLOC_240515"; | transcript_id | "Novel_003372"; | exon_number | "7";  | gene_type | " |
| Dt_chr9 | Cufflinks | exon | 68146218 | 68146370 | . | - | . | gene_id | "XLOC_240515"; | transcript_id | "Novel_003372"; | exon_number | "8";  | gene_type | " |
| Dt_chr9 | Cufflinks | exon | 68146441 | 68146518 | . | - | . | gene_id | "XLOC_240515"; | transcript_id | "Novel_003372"; | exon_number | "9";  | gene_type | " |
| Dt_chr9 | Cufflinks | exon | 68146608 | 68146763 | . | - | . | gene_id | "XLOC_240515"; | transcript_id | "Novel_003372"; | exon_number | "10"; | gene_type | " |
| Dt_chr9 | Cufflinks | exon | 68146869 | 68147027 | . | - | . | gene_id | "XLOC_240515"; | transcript_id | "Novel_003372"; | exon_number | "11"; | gene_type | " |
| Dt_chr9 | Cufflinks | exon | 68147119 | 68147723 | . | - | . | gene_id | "XLOC_240515"; | transcript_id | "Novel_003372"; | exon_number | "12"; | gene_type | " |
| Dt_chr9 | Cufflinks | exon | 68144387 | 68145604 | . | - | . | gene_id | "XLOC_240515"; | transcript_id | "Novel_003373"; | exon_number | "1";  | gene_type | " |
| Dt_chr9 | Cufflinks | exon | 68146218 | 68146518 | . | - | . | gene_id | "XLOC_240515"; | transcript_id | "Novel_003373"; | exon_number | "2";  | gene_type | " |
| Dt_chr9 | Cufflinks | exon | 68146608 | 68147884 | . | - | . | gene_id | "XLOC_240515"; | transcript_id | "Novel_003373"; | exon_number | "3";  | gene_type | " |
| Dt_chr9 | Cufflinks | exon | 68144388 | 68145604 | . | - | . | gene_id | "XLOC_240515"; | transcript_id | "Novel_003374"; | exon_number | "1";  | gene_type | " |
| Dt_chr9 | Cufflinks | exon | 68146218 | 68146370 | . | - | . | gene_id | "XLOC_240515"; | transcript_id | "Novel_003374"; | exon_number | "2";  | gene_type | " |
| Dt_chr9 | Cufflinks | exon | 68146441 | 68146518 | . | - | . | gene_id | "XLOC_240515"; | transcript_id | "Novel_003374"; | exon_number | "3";  | gene_type | " |
| Dt_chr9 | Cufflinks | exon | 68146608 | 68146763 | . | - | . | gene_id | "XLOC_240515"; | transcript_id | "Novel_003374"; | exon_number | "4";  | gene_type | " |
| Dt_chr9 | Cufflinks | exon | 68146869 | 68147027 | . | - | . | gene_id | "XLOC_240515"; | transcript_id | "Novel_003374"; | exon_number | "5";  | gene_type | " |
| Dt_chr9 | Cufflinks | exon | 68147119 | 68147850 | . | - | . | gene_id | "XLOC_240515"; | transcript_id | "Novel_003374"; | exon_number | "6";  | gene_type | " |
| Dt_chr9 | Cufflinks | exon | 68298646 | 68299122 | . | - | . | gene_id | "XLOC_240555"; | transcript_id | "Novel_003375"; | exon_number | "1";  | gene_type | " |
| Dt_chr9 | Cufflinks | exon | 68299541 | 68299796 | . | - | . | gene_id | "XLOC_240555"; | transcript_id | "Novel_003375"; | exon_number | "2";  | gene_type | " |
| Dt_chr9 | Cufflinks | exon | 68301137 | 68302231 | . | - | . | gene_id | "XLOC_240555"; | transcript_id | "Novel_003375"; | exon_number | "3";  | gene_type | " |
| Dt_chr9 | Cufflinks | exon | 68337650 | 68338120 | . | - | . | gene_id | "XLOC_240568"; | transcript_id | "Novel_003376"; | exon_number | "1";  | gene_type | " |
| Dt_chr9 | Cufflinks | exon | 68338218 | 68338328 | . | - | . | gene_id | "XLOC_240568"; | transcript_id | "Novel_003376"; | exon_number | "2";  | gene_type | " |
| Dt_chr9 | Cufflinks | exon | 68338581 | 68338980 | . | - | . | gene_id | "XLOC_240568"; | transcript_id | "Novel_003376"; | exon_number | "3";  | gene_type | " |
| Dt_chr9 | Cufflinks | exon | 68337919 | 68338120 | . | - | . | gene_id | "XLOC_240568"; | transcript_id | "Novel_003377"; | exon_number | "1";  | gene_type | " |
| Dt_chr9 | Cufflinks | exon | 68338218 | 68338328 | . | - | . | gene_id | "XLOC_240568"; | transcript_id | "Novel_003377"; | exon_number | "2";  | gene_type | " |
| Dt_chr9 | Cufflinks | exon | 68338581 | 68338683 | . | - | . | gene_id | "XLOC_240568"; | transcript_id | "Novel_003377"; | exon_number | "3";  | gene_type | " |
| Dt_chr9 | Cufflinks | exon | 68338896 | 68338960 | . | - | . | gene_id | "XLOC_240568"; | transcript_id | "Novel_003377"; | exon_number | "4";  | gene_type | " |
| Dt_chr9 | Cufflinks | exon | 68339074 | 68339168 | . | - | . | gene_id | "XLOC_240568"; | transcript_id | "Novel_003377"; | exon_number | "5";  | gene_type | " |
| Dt_chr9 | Cufflinks | exon | 68339105 | 68339162 | . | - | . | gene_id | "XLOC_240568"; | transcript_id | "Novel_003378"; | exon_number | "1";  | gene_type | " |
| Dt_chr9 | Cufflinks | exon | 68339293 | 68339469 | . | - | . | gene_id | "XLOC_240568"; | transcript_id | "Novel_003378"; | exon_number | "2";  | gene_type | " |
| Dt_chr9 | Cufflinks | exon | 68339737 | 68339886 | . | - | . | gene_id | "XLOC_240568"; | transcript_id | "Novel_003378"; | exon_number | "3";  | gene_type | " |
| Dt_chr9 | Cufflinks | exon | 68340415 | 68340625 | . | - | . | gene_id | "XLOC_240568"; | transcript_id | "Novel_003378"; | exon_number | "4";  | gene_type | " |
| Dt_chr9 | Cufflinks | exon | 68490228 | 68490921 | . | - | . | gene_id | "XLOC_240592"; | transcript_id | "Novel_003379"; | exon_number | "1";  | gene_type | " |
| Dt_chr9 | Cufflinks | exon | 68491003 | 68491175 | . | - | . | gene_id | "XLOC_240592"; | transcript_id | "Novel_003379"; | exon_number | "2";  | gene_type | " |
| Dt_chr9 | Cufflinks | exon | 68491274 | 68491864 | . | - | . | gene_id | "XLOC_240592"; | transcript_id | "Novel_003379"; | exon_number | "3";  | gene_type | " |

|           |           |      |          |          |   |   |   |         |                              |                             |                 |   |
|-----------|-----------|------|----------|----------|---|---|---|---------|------------------------------|-----------------------------|-----------------|---|
| Dt_chr9   | Cufflinks | exon | 68490576 | 68491175 | . | - | . | gene_id | "XLOC_240592"; transcript_id | "Novel_003380"; exon_number | "1"; gene_type  | " |
| Dt_chr9   | Cufflinks | exon | 68491274 | 68491854 | . | - | . | gene_id | "XLOC_240592"; transcript_id | "Novel_003380"; exon_number | "2"; gene_type  | " |
| Dt_chr9   | Cufflinks | exon | 69167677 | 69168213 | . | - | . | gene_id | "XLOC_240665"; transcript_id | "Novel_003381"; exon_number | "1"; gene_type  | " |
| Dt_chr9   | Cufflinks | exon | 69171855 | 69176249 | . | - | . | gene_id | "XLOC_240665"; transcript_id | "Novel_003381"; exon_number | "2"; gene_type  | " |
| Dt_chr9   | Cufflinks | exon | 69406371 | 69408175 | . | - | . | gene_id | "XLOC_240685"; transcript_id | "Novel_003382"; exon_number | "1"; gene_type  | " |
| Dt_chr9   | Cufflinks | exon | 69413188 | 69413355 | . | - | . | gene_id | "XLOC_240685"; transcript_id | "Novel_003382"; exon_number | "2"; gene_type  | " |
| Dt_chr9   | Cufflinks | exon | 69522109 | 69522323 | . | - | . | gene_id | "XLOC_240706"; transcript_id | "Novel_003383"; exon_number | "1"; gene_type  | " |
| scaffold1 | Cufflinks | exon | 147550   | 148463   | . | + | . | gene_id | "XLOC_241507"; transcript_id | "Novel_003384"; exon_number | "1"; gene_type  | " |
| scaffold1 | Cufflinks | exon | 149159   | 149354   | . | + | . | gene_id | "XLOC_241507"; transcript_id | "Novel_003384"; exon_number | "2"; gene_type  | " |
| scaffold1 | Cufflinks | exon | 150038   | 150162   | . | + | . | gene_id | "XLOC_241507"; transcript_id | "Novel_003384"; exon_number | "3"; gene_type  | " |
| scaffold1 | Cufflinks | exon | 150248   | 150406   | . | + | . | gene_id | "XLOC_241507"; transcript_id | "Novel_003384"; exon_number | "4"; gene_type  | " |
| scaffold1 | Cufflinks | exon | 150493   | 150983   | . | + | . | gene_id | "XLOC_241507"; transcript_id | "Novel_003384"; exon_number | "5"; gene_type  | " |
| scaffold1 | Cufflinks | exon | 148771   | 149354   | . | + | . | gene_id | "XLOC_241507"; transcript_id | "Novel_003385"; exon_number | "1"; gene_type  | " |
| scaffold1 | Cufflinks | exon | 150038   | 150162   | . | + | . | gene_id | "XLOC_241507"; transcript_id | "Novel_003385"; exon_number | "2"; gene_type  | " |
| scaffold1 | Cufflinks | exon | 150248   | 150406   | . | + | . | gene_id | "XLOC_241507"; transcript_id | "Novel_003385"; exon_number | "3"; gene_type  | " |
| scaffold1 | Cufflinks | exon | 150493   | 151016   | . | + | . | gene_id | "XLOC_241507"; transcript_id | "Novel_003385"; exon_number | "4"; gene_type  | " |
| scaffold1 | Cufflinks | exon | 330025   | 330786   | . | + | . | gene_id | "XLOC_241534"; transcript_id | "Novel_003386"; exon_number | "1"; gene_type  | " |
| scaffold1 | Cufflinks | exon | 332088   | 332423   | . | + | . | gene_id | "XLOC_241534"; transcript_id | "Novel_003386"; exon_number | "2"; gene_type  | " |
| scaffold1 | Cufflinks | exon | 400514   | 400717   | . | + | . | gene_id | "XLOC_241544"; transcript_id | "Novel_003387"; exon_number | "1"; gene_type  | " |
| scaffold1 | Cufflinks | exon | 400804   | 400904   | . | + | . | gene_id | "XLOC_241544"; transcript_id | "Novel_003387"; exon_number | "2"; gene_type  | " |
| scaffold1 | Cufflinks | exon | 401320   | 401435   | . | + | . | gene_id | "XLOC_241544"; transcript_id | "Novel_003387"; exon_number | "3"; gene_type  | " |
| scaffold1 | Cufflinks | exon | 401528   | 401627   | . | + | . | gene_id | "XLOC_241544"; transcript_id | "Novel_003387"; exon_number | "4"; gene_type  | " |
| scaffold1 | Cufflinks | exon | 401949   | 402095   | . | + | . | gene_id | "XLOC_241544"; transcript_id | "Novel_003387"; exon_number | "5"; gene_type  | " |
| scaffold1 | Cufflinks | exon | 402166   | 402226   | . | + | . | gene_id | "XLOC_241544"; transcript_id | "Novel_003387"; exon_number | "6"; gene_type  | " |
| scaffold1 | Cufflinks | exon | 402304   | 402401   | . | + | . | gene_id | "XLOC_241544"; transcript_id | "Novel_003387"; exon_number | "7"; gene_type  | " |
| scaffold1 | Cufflinks | exon | 402791   | 402933   | . | + | . | gene_id | "XLOC_241544"; transcript_id | "Novel_003387"; exon_number | "8"; gene_type  | " |
| scaffold1 | Cufflinks | exon | 403011   | 403094   | . | + | . | gene_id | "XLOC_241544"; transcript_id | "Novel_003387"; exon_number | "9"; gene_type  | " |
| scaffold1 | Cufflinks | exon | 403177   | 403266   | . | + | . | gene_id | "XLOC_241544"; transcript_id | "Novel_003387"; exon_number | "10"; gene_type | " |
| scaffold1 | Cufflinks | exon | 403374   | 403616   | . | + | . | gene_id | "XLOC_241544"; transcript_id | "Novel_003387"; exon_number | "11"; gene_type | " |
| scaffold1 | Cufflinks | exon | 806755   | 807156   | . | + | . | gene_id | "XLOC_241607"; transcript_id | "Novel_003388"; exon_number | "1"; gene_type  | " |
| scaffold1 | Cufflinks | exon | 807336   | 807476   | . | + | . | gene_id | "XLOC_241607"; transcript_id | "Novel_003388"; exon_number | "2"; gene_type  | " |
| scaffold1 | Cufflinks | exon | 807593   | 807751   | . | + | . | gene_id | "XLOC_241607"; transcript_id | "Novel_003388"; exon_number | "3"; gene_type  | " |
| scaffold1 | Cufflinks | exon | 808292   | 809699   | . | + | . | gene_id | "XLOC_241607"; transcript_id | "Novel_003388"; exon_number | "4"; gene_type  | " |
| scaffold1 | Cufflinks | exon | 1313643  | 1313809  | . | + | . | gene_id | "XLOC_241674"; transcript_id | "Novel_003389"; exon_number | "1"; gene_type  | " |
| scaffold1 | Cufflinks | exon | 1314975  | 1316167  | . | + | . | gene_id | "XLOC_241674"; transcript_id | "Novel_003389"; exon_number | "2"; gene_type  | " |



|                    |      |         |         |   |   |   |                                                                                   |
|--------------------|------|---------|---------|---|---|---|-----------------------------------------------------------------------------------|
| scaffold1Cufflinks | exon | 1940691 | 1940968 | . | + | . | gene_id "XLOC_241783"; transcript_id "Novel_003390"; exon_number "1"; gene_type " |
| scaffold1Cufflinks | exon | 1941825 | 1942073 | . | + | . | gene_id "XLOC_241783"; transcript_id "Novel_003390"; exon_number "2"; gene_type " |
| scaffold1Cufflinks | exon | 1943122 | 1943647 | . | + | . | gene_id "XLOC_241783"; transcript_id "Novel_003390"; exon_number "3"; gene_type " |
| scaffold1Cufflinks | exon | 1940777 | 1940968 | . | + | . | gene_id "XLOC_241783"; transcript_id "Novel_003391"; exon_number "1"; gene_type " |
| scaffold1Cufflinks | exon | 1941825 | 1942105 | . | + | . | gene_id "XLOC_241783"; transcript_id "Novel_003391"; exon_number "2"; gene_type " |
| scaffold1Cufflinks | exon | 1941623 | 1942073 | . | + | . | gene_id "XLOC_241783"; transcript_id "Novel_003392"; exon_number "1"; gene_type " |
| scaffold1Cufflinks | exon | 1943122 | 1943507 | . | + | . | gene_id "XLOC_241783"; transcript_id "Novel_003392"; exon_number "2"; gene_type " |
| scaffold1Cufflinks | exon | 482124  | 484540  | . | - | . | gene_id "XLOC_241872"; transcript_id "Novel_003393"; exon_number "1"; gene_type " |
| scaffold1Cufflinks | exon | 484665  | 484805  | . | - | . | gene_id "XLOC_241872"; transcript_id "Novel_003393"; exon_number "2"; gene_type " |
| scaffold1Cufflinks | exon | 484982  | 485401  | . | - | . | gene_id "XLOC_241872"; transcript_id "Novel_003393"; exon_number "3"; gene_type " |
| scaffold1Cufflinks | exon | 483260  | 483850  | . | - | . | gene_id "XLOC_241872"; transcript_id "Novel_003394"; exon_number "1"; gene_type " |
| scaffold1Cufflinks | exon | 484382  | 484540  | . | - | . | gene_id "XLOC_241872"; transcript_id "Novel_003394"; exon_number "2"; gene_type " |
| scaffold1Cufflinks | exon | 484665  | 484805  | . | - | . | gene_id "XLOC_241872"; transcript_id "Novel_003394"; exon_number "3"; gene_type " |
| scaffold1Cufflinks | exon | 484982  | 485382  | . | - | . | gene_id "XLOC_241872"; transcript_id "Novel_003394"; exon_number "4"; gene_type " |
| scaffold1Cufflinks | exon | 966900  | 967524  | . | - | . | gene_id "XLOC_241938"; transcript_id "Novel_003395"; exon_number "1"; gene_type " |
| scaffold1Cufflinks | exon | 968884  | 969613  | . | - | . | gene_id "XLOC_241938"; transcript_id "Novel_003395"; exon_number "2"; gene_type " |
| scaffold1Cufflinks | exon | 1109024 | 1109561 | . | - | . | gene_id "XLOC_241951"; transcript_id "Novel_003396"; exon_number "1"; gene_type " |
| scaffold1Cufflinks | exon | 1109648 | 1109806 | . | - | . | gene_id "XLOC_241951"; transcript_id "Novel_003396"; exon_number "2"; gene_type " |
| scaffold1Cufflinks | exon | 1109892 | 1110016 | . | - | . | gene_id "XLOC_241951"; transcript_id "Novel_003396"; exon_number "3"; gene_type " |
| scaffold1Cufflinks | exon | 1110700 | 1110895 | . | - | . | gene_id "XLOC_241951"; transcript_id "Novel_003396"; exon_number "4"; gene_type " |
| scaffold1Cufflinks | exon | 1111591 | 1111723 | . | - | . | gene_id "XLOC_241951"; transcript_id "Novel_003396"; exon_number "5"; gene_type " |
| scaffold1Cufflinks | exon | 1111817 | 1112537 | . | - | . | gene_id "XLOC_241951"; transcript_id "Novel_003396"; exon_number "6"; gene_type " |
| scaffold1Cufflinks | exon | 211800  | 212236  | . | + | . | gene_id "XLOC_242326"; transcript_id "Novel_003397"; exon_number "1"; gene_type " |
| scaffold1Cufflinks | exon | 213578  | 213832  | . | + | . | gene_id "XLOC_242326"; transcript_id "Novel_003397"; exon_number "2"; gene_type " |
| scaffold1Cufflinks | exon | 213999  | 214521  | . | + | . | gene_id "XLOC_242326"; transcript_id "Novel_003397"; exon_number "3"; gene_type " |
| scaffold1Cufflinks | exon | 354876  | 355197  | . | + | . | gene_id "XLOC_242358"; transcript_id "Novel_003398"; exon_number "1"; gene_type " |
| scaffold1Cufflinks | exon | 355307  | 355733  | . | + | . | gene_id "XLOC_242358"; transcript_id "Novel_003398"; exon_number "2"; gene_type " |
| scaffold1Cufflinks | exon | 19      | 488     | . | - | . | gene_id "XLOC_242477"; transcript_id "Novel_003399"; exon_number "1"; gene_type " |
| scaffold1Cufflinks | exon | 585     | 673     | . | - | . | gene_id "XLOC_242477"; transcript_id "Novel_003399"; exon_number "2"; gene_type " |
| scaffold1Cufflinks | exon | 990     | 1111    | . | - | . | gene_id "XLOC_242477"; transcript_id "Novel_003399"; exon_number "3"; gene_type " |
| scaffold1Cufflinks | exon | 1608    | 1714    | . | - | . | gene_id "XLOC_242477"; transcript_id "Novel_003399"; exon_number "4"; gene_type " |
| scaffold1Cufflinks | exon | 1789    | 1859    | . | - | . | gene_id "XLOC_242477"; transcript_id "Novel_003399"; exon_number "5"; gene_type " |
| scaffold1Cufflinks | exon | 2197    | 2290    | . | - | . | gene_id "XLOC_242477"; transcript_id "Novel_003399"; exon_number "6"; gene_type " |
| scaffold1Cufflinks | exon | 2376    | 2530    | . | - | . | gene_id "XLOC_242477"; transcript_id "Novel_003399"; exon_number "7"; gene_type " |
| scaffold1Cufflinks | exon | 2623    | 2730    | . | - | . | gene_id "XLOC_242477"; transcript_id "Novel_003399"; exon_number "8"; gene_type " |

|                    |      |        |        |   |   |   |                                                                                   |
|--------------------|------|--------|--------|---|---|---|-----------------------------------------------------------------------------------|
| scaffold1Cufflinks | exon | 2974   | 3295   | . | - | . | gene_id "XLOC_242477"; transcript_id "Novel_003399"; exon_number "9"; gene_type " |
| scaffold1Cufflinks | exon | 1526   | 1714   | . | - | . | gene_id "XLOC_242477"; transcript_id "Novel_003400"; exon_number "1"; gene_type " |
| scaffold1Cufflinks | exon | 1789   | 1859   | . | - | . | gene_id "XLOC_242477"; transcript_id "Novel_003400"; exon_number "2"; gene_type " |
| scaffold1Cufflinks | exon | 2197   | 2290   | . | - | . | gene_id "XLOC_242477"; transcript_id "Novel_003400"; exon_number "3"; gene_type " |
| scaffold1Cufflinks | exon | 2376   | 2530   | . | - | . | gene_id "XLOC_242477"; transcript_id "Novel_003400"; exon_number "4"; gene_type " |
| scaffold1Cufflinks | exon | 2623   | 2730   | . | - | . | gene_id "XLOC_242477"; transcript_id "Novel_003400"; exon_number "5"; gene_type " |
| scaffold1Cufflinks | exon | 2974   | 3262   | . | - | . | gene_id "XLOC_242477"; transcript_id "Novel_003400"; exon_number "6"; gene_type " |
| scaffold1Cufflinks | exon | 395    | 610    | . | + | . | gene_id "XLOC_242656"; transcript_id "Novel_003401"; exon_number "1"; gene_type " |
| scaffold1Cufflinks | exon | 54     | 288    | . | + | . | gene_id "XLOC_242677"; transcript_id "Novel_003402"; exon_number "1"; gene_type " |
| scaffold1Cufflinks | exon | 2260   | 2751   | . | + | . | gene_id "XLOC_242679"; transcript_id "Novel_003403"; exon_number "1"; gene_type " |
| scaffold1Cufflinks | exon | 2943   | 3010   | . | + | . | gene_id "XLOC_242679"; transcript_id "Novel_003403"; exon_number "2"; gene_type " |
| scaffold1Cufflinks | exon | 3145   | 3300   | . | + | . | gene_id "XLOC_242679"; transcript_id "Novel_003403"; exon_number "3"; gene_type " |
| scaffold1Cufflinks | exon | 2814   | 3010   | . | + | . | gene_id "XLOC_242679"; transcript_id "Novel_003404"; exon_number "1"; gene_type " |
| scaffold1Cufflinks | exon | 3145   | 3306   | . | + | . | gene_id "XLOC_242679"; transcript_id "Novel_003404"; exon_number "2"; gene_type " |
| scaffold1Cufflinks | exon | 1247   | 1527   | . | + | . | gene_id "XLOC_242680"; transcript_id "Novel_003405"; exon_number "1"; gene_type " |
| scaffold1Cufflinks | exon | 196310 | 196517 | . | + | . | gene_id "XLOC_242713"; transcript_id "Novel_003406"; exon_number "1"; gene_type " |
| scaffold1Cufflinks | exon | 196614 | 196796 | . | + | . | gene_id "XLOC_242713"; transcript_id "Novel_003406"; exon_number "2"; gene_type " |
| scaffold1Cufflinks | exon | 727    | 1210   | . | - | . | gene_id "XLOC_242837"; transcript_id "Novel_003407"; exon_number "1"; gene_type " |
| scaffold1Cufflinks | exon | 1599   | 1775   | . | - | . | gene_id "XLOC_242837"; transcript_id "Novel_003407"; exon_number "2"; gene_type " |
| scaffold1Cufflinks | exon | 2683   | 3339   | . | - | . | gene_id "XLOC_242837"; transcript_id "Novel_003407"; exon_number "3"; gene_type " |
| scaffold1Cufflinks | exon | 491    | 805    | . | - | . | gene_id "XLOC_242977"; transcript_id "Novel_003408"; exon_number "1"; gene_type " |
| scaffold1Cufflinks | exon | 228329 | 228984 | . | - | . | gene_id "XLOC_243044"; transcript_id "Novel_003409"; exon_number "1"; gene_type " |
| scaffold1Cufflinks | exon | 230801 | 230891 | . | - | . | gene_id "XLOC_243044"; transcript_id "Novel_003409"; exon_number "2"; gene_type " |
| scaffold1Cufflinks | exon | 231023 | 231070 | . | - | . | gene_id "XLOC_243044"; transcript_id "Novel_003409"; exon_number "3"; gene_type " |
| scaffold1Cufflinks | exon | 231235 | 231412 | . | - | . | gene_id "XLOC_243044"; transcript_id "Novel_003409"; exon_number "4"; gene_type " |
| scaffold1Cufflinks | exon | 228329 | 228984 | . | - | . | gene_id "XLOC_243044"; transcript_id "Novel_003410"; exon_number "1"; gene_type " |
| scaffold1Cufflinks | exon | 230801 | 230906 | . | - | . | gene_id "XLOC_243044"; transcript_id "Novel_003410"; exon_number "2"; gene_type " |
| scaffold1Cufflinks | exon | 231023 | 231070 | . | - | . | gene_id "XLOC_243044"; transcript_id "Novel_003410"; exon_number "3"; gene_type " |
| scaffold1Cufflinks | exon | 231235 | 231412 | . | - | . | gene_id "XLOC_243044"; transcript_id "Novel_003410"; exon_number "4"; gene_type " |
| scaffold1Cufflinks | exon | 532102 | 532597 | . | - | . | gene_id "XLOC_243080"; transcript_id "Novel_003411"; exon_number "1"; gene_type " |
| scaffold1Cufflinks | exon | 532890 | 533737 | . | - | . | gene_id "XLOC_243080"; transcript_id "Novel_003411"; exon_number "2"; gene_type " |
| scaffold1Cufflinks | exon | 465637 | 466267 | . | - | . | gene_id "XLOC_243274"; transcript_id "Novel_003412"; exon_number "1"; gene_type " |
| scaffold1Cufflinks | exon | 466389 | 466451 | . | - | . | gene_id "XLOC_243274"; transcript_id "Novel_003412"; exon_number "2"; gene_type " |
| scaffold1Cufflinks | exon | 466549 | 466930 | . | - | . | gene_id "XLOC_243274"; transcript_id "Novel_003412"; exon_number "3"; gene_type " |
| scaffold1Cufflinks | exon | 465637 | 466290 | . | - | . | gene_id "XLOC_243274"; transcript_id "Novel_003413"; exon_number "1"; gene_type " |

|                    |      |        |        |   |   |   |                                                                                   |
|--------------------|------|--------|--------|---|---|---|-----------------------------------------------------------------------------------|
| scaffold1Cufflinks | exon | 466389 | 466451 | . | - | . | gene_id "XLOC_243274"; transcript_id "Novel_003413"; exon_number "2"; gene_type " |
| scaffold1Cufflinks | exon | 466549 | 466622 | . | - | . | gene_id "XLOC_243274"; transcript_id "Novel_003413"; exon_number "3"; gene_type " |
| scaffold1Cufflinks | exon | 466695 | 466930 | . | - | . | gene_id "XLOC_243274"; transcript_id "Novel_003413"; exon_number "4"; gene_type " |
| scaffold1Cufflinks | exon | 465767 | 466622 | . | - | . | gene_id "XLOC_243274"; transcript_id "Novel_003414"; exon_number "1"; gene_type " |
| scaffold1Cufflinks | exon | 466695 | 466930 | . | - | . | gene_id "XLOC_243274"; transcript_id "Novel_003414"; exon_number "2"; gene_type " |
| scaffold1Cufflinks | exon | 465767 | 466290 | . | - | . | gene_id "XLOC_243274"; transcript_id "Novel_003415"; exon_number "1"; gene_type " |
| scaffold1Cufflinks | exon | 466389 | 466451 | . | - | . | gene_id "XLOC_243274"; transcript_id "Novel_003415"; exon_number "2"; gene_type " |
| scaffold1Cufflinks | exon | 466549 | 466930 | . | - | . | gene_id "XLOC_243274"; transcript_id "Novel_003415"; exon_number "3"; gene_type " |
| scaffold1Cufflinks | exon | 465856 | 466267 | . | - | . | gene_id "XLOC_243274"; transcript_id "Novel_003416"; exon_number "1"; gene_type " |
| scaffold1Cufflinks | exon | 466389 | 466451 | . | - | . | gene_id "XLOC_243274"; transcript_id "Novel_003416"; exon_number "2"; gene_type " |
| scaffold1Cufflinks | exon | 466549 | 466622 | . | - | . | gene_id "XLOC_243274"; transcript_id "Novel_003416"; exon_number "3"; gene_type " |
| scaffold1Cufflinks | exon | 466695 | 466969 | . | - | . | gene_id "XLOC_243274"; transcript_id "Novel_003416"; exon_number "4"; gene_type " |
| scaffold1Cufflinks | exon | 105514 | 105646 | . | + | . | gene_id "XLOC_243406"; transcript_id "Novel_003417"; exon_number "1"; gene_type " |
| scaffold1Cufflinks | exon | 105750 | 105810 | . | + | . | gene_id "XLOC_243406"; transcript_id "Novel_003417"; exon_number "2"; gene_type " |
| scaffold1Cufflinks | exon | 105935 | 106027 | . | + | . | gene_id "XLOC_243406"; transcript_id "Novel_003417"; exon_number "3"; gene_type " |
| scaffold1Cufflinks | exon | 106394 | 106590 | . | + | . | gene_id "XLOC_243406"; transcript_id "Novel_003417"; exon_number "4"; gene_type " |
| scaffold1Cufflinks | exon | 106697 | 107294 | . | + | . | gene_id "XLOC_243406"; transcript_id "Novel_003417"; exon_number "5"; gene_type " |
| scaffold1Cufflinks | exon | 105539 | 105650 | . | + | . | gene_id "XLOC_243406"; transcript_id "Novel_003418"; exon_number "1"; gene_type " |
| scaffold1Cufflinks | exon | 105750 | 105810 | . | + | . | gene_id "XLOC_243406"; transcript_id "Novel_003418"; exon_number "2"; gene_type " |
| scaffold1Cufflinks | exon | 105935 | 106027 | . | + | . | gene_id "XLOC_243406"; transcript_id "Novel_003418"; exon_number "3"; gene_type " |
| scaffold1Cufflinks | exon | 106394 | 106590 | . | + | . | gene_id "XLOC_243406"; transcript_id "Novel_003418"; exon_number "4"; gene_type " |
| scaffold1Cufflinks | exon | 106697 | 106712 | . | + | . | gene_id "XLOC_243406"; transcript_id "Novel_003418"; exon_number "5"; gene_type " |
| scaffold1Cufflinks | exon | 106767 | 106802 | . | + | . | gene_id "XLOC_243406"; transcript_id "Novel_003419"; exon_number "1"; gene_type " |
| scaffold1Cufflinks | exon | 108296 | 108442 | . | + | . | gene_id "XLOC_243406"; transcript_id "Novel_003419"; exon_number "2"; gene_type " |
| scaffold1Cufflinks | exon | 109146 | 109502 | . | + | . | gene_id "XLOC_243406"; transcript_id "Novel_003419"; exon_number "3"; gene_type " |
| scaffold1Cufflinks | exon | 72029  | 72900  | . | - | . | gene_id "XLOC_243463"; transcript_id "Novel_003420"; exon_number "1"; gene_type " |
| scaffold1Cufflinks | exon | 73354  | 73547  | . | - | . | gene_id "XLOC_243463"; transcript_id "Novel_003420"; exon_number "2"; gene_type " |
| scaffold1Cufflinks | exon | 168978 | 170881 | . | - | . | gene_id "XLOC_243469"; transcript_id "Novel_003421"; exon_number "1"; gene_type " |
| scaffold1Cufflinks | exon | 270581 | 270730 | . | - | . | gene_id "XLOC_243481"; transcript_id "Novel_003422"; exon_number "1"; gene_type " |
| scaffold1Cufflinks | exon | 270812 | 271423 | . | - | . | gene_id "XLOC_243481"; transcript_id "Novel_003422"; exon_number "2"; gene_type " |
| scaffold1Cufflinks | exon | 272636 | 273037 | . | - | . | gene_id "XLOC_243481"; transcript_id "Novel_003422"; exon_number "3"; gene_type " |
| scaffold1Cufflinks | exon | 273343 | 273550 | . | - | . | gene_id "XLOC_243481"; transcript_id "Novel_003422"; exon_number "4"; gene_type " |
| scaffold1Cufflinks | exon | 540737 | 540767 | . | - | . | gene_id "XLOC_243510"; transcript_id "Novel_003423"; exon_number "1"; gene_type " |
| scaffold1Cufflinks | exon | 541178 | 542270 | . | - | . | gene_id "XLOC_243510"; transcript_id "Novel_003423"; exon_number "2"; gene_type " |
| scaffold1Cufflinks | exon | 569321 | 569496 | . | - | . | gene_id "XLOC_243512"; transcript_id "Novel_003424"; exon_number "1"; gene_type " |

|                    |      |        |        |   |   |   |         |                |               |                 |             |      |           |   |
|--------------------|------|--------|--------|---|---|---|---------|----------------|---------------|-----------------|-------------|------|-----------|---|
| scaffold1Cufflinks | exon | 569643 | 569693 | . | - | . | gene_id | "XLOC_243512"; | transcript_id | "Novel_003424"; | exon_number | "2"; | gene_type | " |
| scaffold1Cufflinks | exon | 297670 | 298863 | . | - | . | gene_id | "XLOC_243645"; | transcript_id | "Novel_003425"; | exon_number | "1"; | gene_type | " |
| scaffold1Cufflinks | exon | 300072 | 300279 | . | - | . | gene_id | "XLOC_243645"; | transcript_id | "Novel_003425"; | exon_number | "2"; | gene_type | " |
| scaffold1Cufflinks | exon | 209451 | 209896 | . | + | . | gene_id | "XLOC_243849"; | transcript_id | "Novel_003426"; | exon_number | "1"; | gene_type | " |
| scaffold1Cufflinks | exon | 210064 | 210154 | . | + | . | gene_id | "XLOC_243849"; | transcript_id | "Novel_003426"; | exon_number | "2"; | gene_type | " |
| scaffold1Cufflinks | exon | 210687 | 210756 | . | + | . | gene_id | "XLOC_243849"; | transcript_id | "Novel_003426"; | exon_number | "3"; | gene_type | " |
| scaffold1Cufflinks | exon | 210851 | 210946 | . | + | . | gene_id | "XLOC_243849"; | transcript_id | "Novel_003426"; | exon_number | "4"; | gene_type | " |
| scaffold1Cufflinks | exon | 211500 | 211834 | . | + | . | gene_id | "XLOC_243849"; | transcript_id | "Novel_003426"; | exon_number | "5"; | gene_type | " |
| scaffold1Cufflinks | exon | 211927 | 212047 | . | + | . | gene_id | "XLOC_243849"; | transcript_id | "Novel_003426"; | exon_number | "6"; | gene_type | " |
| scaffold1Cufflinks | exon | 212176 | 212446 | . | + | . | gene_id | "XLOC_243849"; | transcript_id | "Novel_003426"; | exon_number | "7"; | gene_type | " |
| scaffold1Cufflinks | exon | 416545 | 417703 | . | - | . | gene_id | "XLOC_243942"; | transcript_id | "Novel_003427"; | exon_number | "1"; | gene_type | " |
| scaffold1Cufflinks | exon | 417888 | 418944 | . | - | . | gene_id | "XLOC_243942"; | transcript_id | "Novel_003427"; | exon_number | "2"; | gene_type | " |
| scaffold1Cufflinks | exon | 417332 | 417698 | . | - | . | gene_id | "XLOC_243942"; | transcript_id | "Novel_003428"; | exon_number | "1"; | gene_type | " |
| scaffold1Cufflinks | exon | 417888 | 419018 | . | - | . | gene_id | "XLOC_243942"; | transcript_id | "Novel_003428"; | exon_number | "2"; | gene_type | " |
| scaffold1Cufflinks | exon | 260055 | 260795 | . | + | . | gene_id | "XLOC_244223"; | transcript_id | "Novel_003429"; | exon_number | "1"; | gene_type | " |
| scaffold1Cufflinks | exon | 261582 | 262256 | . | + | . | gene_id | "XLOC_244223"; | transcript_id | "Novel_003429"; | exon_number | "2"; | gene_type | " |
| scaffold1Cufflinks | exon | 432253 | 434175 | . | + | . | gene_id | "XLOC_244253"; | transcript_id | "Novel_003430"; | exon_number | "1"; | gene_type | " |
| scaffold1Cufflinks | exon | 179941 | 180959 | . | - | . | gene_id | "XLOC_244276"; | transcript_id | "Novel_003431"; | exon_number | "1"; | gene_type | " |
| scaffold1Cufflinks | exon | 181765 | 181931 | . | - | . | gene_id | "XLOC_244276"; | transcript_id | "Novel_003431"; | exon_number | "2"; | gene_type | " |
| scaffold1Cufflinks | exon | 182079 | 182262 | . | - | . | gene_id | "XLOC_244276"; | transcript_id | "Novel_003431"; | exon_number | "3"; | gene_type | " |
| scaffold1Cufflinks | exon | 182362 | 182439 | . | - | . | gene_id | "XLOC_244276"; | transcript_id | "Novel_003431"; | exon_number | "4"; | gene_type | " |
| scaffold1Cufflinks | exon | 182530 | 182598 | . | - | . | gene_id | "XLOC_244276"; | transcript_id | "Novel_003431"; | exon_number | "5"; | gene_type | " |
| scaffold1Cufflinks | exon | 183355 | 183482 | . | - | . | gene_id | "XLOC_244278"; | transcript_id | "Novel_003432"; | exon_number | "1"; | gene_type | " |
| scaffold1Cufflinks | exon | 183962 | 184380 | . | - | . | gene_id | "XLOC_244278"; | transcript_id | "Novel_003432"; | exon_number | "2"; | gene_type | " |
| scaffold1Cufflinks | exon | 300072 | 301437 | . | - | . | gene_id | "XLOC_244286"; | transcript_id | "Novel_003433"; | exon_number | "1"; | gene_type | " |
| scaffold1Cufflinks | exon | 301539 | 301753 | . | - | . | gene_id | "XLOC_244286"; | transcript_id | "Novel_003433"; | exon_number | "2"; | gene_type | " |
| scaffold1Cufflinks | exon | 301674 | 302790 | . | - | . | gene_id | "XLOC_244286"; | transcript_id | "Novel_003434"; | exon_number | "1"; | gene_type | " |
| scaffold1Cufflinks | exon | 303888 | 304676 | . | - | . | gene_id | "XLOC_244286"; | transcript_id | "Novel_003434"; | exon_number | "2"; | gene_type | " |
| scaffold1Cufflinks | exon | 321202 | 323413 | . | - | . | gene_id | "XLOC_244292"; | transcript_id | "Novel_003435"; | exon_number | "1"; | gene_type | " |
| scaffold1Cufflinks | exon | 323831 | 323951 | . | - | . | gene_id | "XLOC_244292"; | transcript_id | "Novel_003435"; | exon_number | "2"; | gene_type | " |
| scaffold1Cufflinks | exon | 324031 | 324081 | . | - | . | gene_id | "XLOC_244292"; | transcript_id | "Novel_003435"; | exon_number | "3"; | gene_type | " |
| scaffold1Cufflinks | exon | 324179 | 324257 | . | - | . | gene_id | "XLOC_244292"; | transcript_id | "Novel_003435"; | exon_number | "4"; | gene_type | " |
| scaffold1Cufflinks | exon | 324352 | 324455 | . | - | . | gene_id | "XLOC_244292"; | transcript_id | "Novel_003435"; | exon_number | "5"; | gene_type | " |
| scaffold1Cufflinks | exon | 324543 | 324624 | . | - | . | gene_id | "XLOC_244292"; | transcript_id | "Novel_003435"; | exon_number | "6"; | gene_type | " |
| scaffold1Cufflinks | exon | 324733 | 324853 | . | - | . | gene_id | "XLOC_244292"; | transcript_id | "Novel_003435"; | exon_number | "7"; | gene_type | " |



|                    |      |        |        |   |   |   |                                                                                   |
|--------------------|------|--------|--------|---|---|---|-----------------------------------------------------------------------------------|
| scaffold1Cufflinks | exon | 82670  | 83112  | . | + | . | gene_id "XLOC_244522"; transcript_id "Novel_003439"; exon_number "1"; gene_type " |
| scaffold1Cufflinks | exon | 83206  | 83504  | . | + | . | gene_id "XLOC_244522"; transcript_id "Novel_003439"; exon_number "2"; gene_type " |
| scaffold1Cufflinks | exon | 83585  | 83725  | . | + | . | gene_id "XLOC_244522"; transcript_id "Novel_003439"; exon_number "3"; gene_type " |
| scaffold1Cufflinks | exon | 83814  | 84093  | . | + | . | gene_id "XLOC_244522"; transcript_id "Novel_003439"; exon_number "4"; gene_type " |
| scaffold1Cufflinks | exon | 89489  | 89950  | . | + | . | gene_id "XLOC_244525"; transcript_id "Novel_003440"; exon_number "1"; gene_type " |
| scaffold1Cufflinks | exon | 90039  | 90560  | . | + | . | gene_id "XLOC_244525"; transcript_id "Novel_003440"; exon_number "2"; gene_type " |
| scaffold1Cufflinks | exon | 90649  | 90876  | . | + | . | gene_id "XLOC_244525"; transcript_id "Novel_003440"; exon_number "3"; gene_type " |
| scaffold1Cufflinks | exon | 16027  | 16088  | . | - | . | gene_id "XLOC_244549"; transcript_id "Novel_003441"; exon_number "1"; gene_type " |
| scaffold1Cufflinks | exon | 21302  | 21376  | . | - | . | gene_id "XLOC_244549"; transcript_id "Novel_003441"; exon_number "2"; gene_type " |
| scaffold1Cufflinks | exon | 21467  | 21563  | . | - | . | gene_id "XLOC_244549"; transcript_id "Novel_003441"; exon_number "3"; gene_type " |
| scaffold1Cufflinks | exon | 287065 | 287626 | . | - | . | gene_id "XLOC_244572"; transcript_id "Novel_003442"; exon_number "1"; gene_type " |
| scaffold1Cufflinks | exon | 288077 | 289495 | . | - | . | gene_id "XLOC_244572"; transcript_id "Novel_003442"; exon_number "2"; gene_type " |
| scaffold1Cufflinks | exon | 289775 | 289921 | . | - | . | gene_id "XLOC_244572"; transcript_id "Novel_003442"; exon_number "3"; gene_type " |
| scaffold1Cufflinks | exon | 290205 | 290351 | . | - | . | gene_id "XLOC_244572"; transcript_id "Novel_003442"; exon_number "4"; gene_type " |
| scaffold1Cufflinks | exon | 290638 | 290784 | . | - | . | gene_id "XLOC_244572"; transcript_id "Novel_003442"; exon_number "5"; gene_type " |
| scaffold1Cufflinks | exon | 291166 | 291492 | . | - | . | gene_id "XLOC_244572"; transcript_id "Novel_003442"; exon_number "6"; gene_type " |
| scaffold1Cufflinks | exon | 291753 | 294051 | . | - | . | gene_id "XLOC_244572"; transcript_id "Novel_003442"; exon_number "7"; gene_type " |
| scaffold1Cufflinks | exon | 344208 | 345539 | . | - | . | gene_id "XLOC_244579"; transcript_id "Novel_003443"; exon_number "1"; gene_type " |
| scaffold1Cufflinks | exon | 346768 | 347647 | . | - | . | gene_id "XLOC_244579"; transcript_id "Novel_003443"; exon_number "2"; gene_type " |
| scaffold1Cufflinks | exon | 347736 | 348318 | . | - | . | gene_id "XLOC_244579"; transcript_id "Novel_003443"; exon_number "3"; gene_type " |
| scaffold1Cufflinks | exon | 346817 | 346868 | . | - | . | gene_id "XLOC_244579"; transcript_id "Novel_003444"; exon_number "1"; gene_type " |
| scaffold1Cufflinks | exon | 347736 | 348314 | . | - | . | gene_id "XLOC_244579"; transcript_id "Novel_003444"; exon_number "2"; gene_type " |
| scaffold1Cufflinks | exon | 353686 | 353770 | . | - | . | gene_id "XLOC_244581"; transcript_id "Novel_003445"; exon_number "1"; gene_type " |
| scaffold1Cufflinks | exon | 461842 | 462826 | . | - | . | gene_id "XLOC_244581"; transcript_id "Novel_003445"; exon_number "2"; gene_type " |
| scaffold1Cufflinks | exon | 370425 | 370716 | . | - | . | gene_id "XLOC_244587"; transcript_id "Novel_003446"; exon_number "1"; gene_type " |
| scaffold1Cufflinks | exon | 371123 | 372078 | . | - | . | gene_id "XLOC_244587"; transcript_id "Novel_003446"; exon_number "2"; gene_type " |
| scaffold1Cufflinks | exon | 464471 | 464950 | . | + | . | gene_id "XLOC_244684"; transcript_id "Novel_003447"; exon_number "1"; gene_type " |
| scaffold1Cufflinks | exon | 465541 | 466086 | . | + | . | gene_id "XLOC_244684"; transcript_id "Novel_003447"; exon_number "2"; gene_type " |
| scaffold1Cufflinks | exon | 464477 | 464514 | . | + | . | gene_id "XLOC_244684"; transcript_id "Novel_003448"; exon_number "1"; gene_type " |
| scaffold1Cufflinks | exon | 464866 | 466086 | . | + | . | gene_id "XLOC_244684"; transcript_id "Novel_003448"; exon_number "2"; gene_type " |
| scaffold1Cufflinks | exon | 135521 | 136053 | . | - | . | gene_id "XLOC_244704"; transcript_id "Novel_003449"; exon_number "1"; gene_type " |
| scaffold1Cufflinks | exon | 136836 | 136968 | . | - | . | gene_id "XLOC_244704"; transcript_id "Novel_003449"; exon_number "2"; gene_type " |
| scaffold1Cufflinks | exon | 12234  | 12487  | . | - | . | gene_id "XLOC_244819"; transcript_id "Novel_003450"; exon_number "1"; gene_type " |
| scaffold1Cufflinks | exon | 557184 | 557807 | . | - | . | gene_id "XLOC_245090"; transcript_id "Novel_003451"; exon_number "1"; gene_type " |
| scaffold1Cufflinks | exon | 559346 | 561404 | . | - | . | gene_id "XLOC_245090"; transcript_id "Novel_003451"; exon_number "2"; gene_type " |

|                    |      |        |        |   |   |   |         |                              |                             |                |   |
|--------------------|------|--------|--------|---|---|---|---------|------------------------------|-----------------------------|----------------|---|
| scaffold1Cufflinks | exon | 557184 | 557807 | . | - | . | gene_id | "XLOC_245090"; transcript_id | "Novel_003452"; exon_number | "1"; gene_type | " |
| scaffold1Cufflinks | exon | 559346 | 561272 | . | - | . | gene_id | "XLOC_245090"; transcript_id | "Novel_003452"; exon_number | "2"; gene_type | " |
| scaffold1Cufflinks | exon | 561362 | 561461 | . | - | . | gene_id | "XLOC_245090"; transcript_id | "Novel_003452"; exon_number | "3"; gene_type | " |
| scaffold1Cufflinks | exon | 558021 | 561272 | . | - | . | gene_id | "XLOC_245090"; transcript_id | "Novel_003453"; exon_number | "1"; gene_type | " |
| scaffold1Cufflinks | exon | 561362 | 561460 | . | - | . | gene_id | "XLOC_245090"; transcript_id | "Novel_003453"; exon_number | "2"; gene_type | " |
| scaffold1Cufflinks | exon | 2      | 503    | . | - | . | gene_id | "XLOC_245098"; transcript_id | "Novel_003454"; exon_number | "1"; gene_type | " |
| scaffold1Cufflinks | exon | 974    | 1064   | . | - | . | gene_id | "XLOC_245098"; transcript_id | "Novel_003454"; exon_number | "2"; gene_type | " |
| scaffold1Cufflinks | exon | 1331   | 1383   | . | - | . | gene_id | "XLOC_245098"; transcript_id | "Novel_003454"; exon_number | "3"; gene_type | " |
| scaffold1Cufflinks | exon | 1984   | 2017   | . | - | . | gene_id | "XLOC_245098"; transcript_id | "Novel_003454"; exon_number | "4"; gene_type | " |
| scaffold1Cufflinks | exon | 2296   | 2455   | . | - | . | gene_id | "XLOC_245098"; transcript_id | "Novel_003454"; exon_number | "5"; gene_type | " |
| scaffold1Cufflinks | exon | 2594   | 2782   | . | - | . | gene_id | "XLOC_245098"; transcript_id | "Novel_003454"; exon_number | "6"; gene_type | " |
| scaffold1Cufflinks | exon | 2      | 503    | . | - | . | gene_id | "XLOC_245098"; transcript_id | "Novel_003455"; exon_number | "1"; gene_type | " |
| scaffold1Cufflinks | exon | 974    | 1064   | . | - | . | gene_id | "XLOC_245098"; transcript_id | "Novel_003455"; exon_number | "2"; gene_type | " |
| scaffold1Cufflinks | exon | 1331   | 2455   | . | - | . | gene_id | "XLOC_245098"; transcript_id | "Novel_003455"; exon_number | "3"; gene_type | " |
| scaffold1Cufflinks | exon | 2594   | 2782   | . | - | . | gene_id | "XLOC_245098"; transcript_id | "Novel_003455"; exon_number | "4"; gene_type | " |
| scaffold1Cufflinks | exon | 7      | 503    | . | - | . | gene_id | "XLOC_245098"; transcript_id | "Novel_003456"; exon_number | "1"; gene_type | " |
| scaffold1Cufflinks | exon | 974    | 1064   | . | - | . | gene_id | "XLOC_245098"; transcript_id | "Novel_003456"; exon_number | "2"; gene_type | " |
| scaffold1Cufflinks | exon | 1331   | 2017   | . | - | . | gene_id | "XLOC_245098"; transcript_id | "Novel_003456"; exon_number | "3"; gene_type | " |
| scaffold1Cufflinks | exon | 2296   | 2455   | . | - | . | gene_id | "XLOC_245098"; transcript_id | "Novel_003456"; exon_number | "4"; gene_type | " |
| scaffold1Cufflinks | exon | 2594   | 2782   | . | - | . | gene_id | "XLOC_245098"; transcript_id | "Novel_003456"; exon_number | "5"; gene_type | " |
| scaffold1Cufflinks | exon | 16     | 503    | . | - | . | gene_id | "XLOC_245098"; transcript_id | "Novel_003457"; exon_number | "1"; gene_type | " |
| scaffold1Cufflinks | exon | 974    | 1064   | . | - | . | gene_id | "XLOC_245098"; transcript_id | "Novel_003457"; exon_number | "2"; gene_type | " |
| scaffold1Cufflinks | exon | 1331   | 1383   | . | - | . | gene_id | "XLOC_245098"; transcript_id | "Novel_003457"; exon_number | "3"; gene_type | " |
| scaffold1Cufflinks | exon | 1727   | 2455   | . | - | . | gene_id | "XLOC_245098"; transcript_id | "Novel_003457"; exon_number | "4"; gene_type | " |
| scaffold1Cufflinks | exon | 2594   | 2781   | . | - | . | gene_id | "XLOC_245098"; transcript_id | "Novel_003457"; exon_number | "5"; gene_type | " |
| scaffold1Cufflinks | exon | 6      | 2474   | . | - | . | gene_id | "XLOC_245176"; transcript_id | "Novel_003458"; exon_number | "1"; gene_type | " |
| scaffold1Cufflinks | exon | 2557   | 2639   | . | - | . | gene_id | "XLOC_245176"; transcript_id | "Novel_003458"; exon_number | "2"; gene_type | " |
| scaffold1Cufflinks | exon | 13     | 298    | . | - | . | gene_id | "XLOC_245177"; transcript_id | "Novel_003459"; exon_number | "1"; gene_type | " |
| scaffold1Cufflinks | exon | 996    | 2642   | . | - | . | gene_id | "XLOC_245177"; transcript_id | "Novel_003459"; exon_number | "2"; gene_type | " |
| scaffold1Cufflinks | exon | 43     | 121    | . | - | . | gene_id | "XLOC_245177"; transcript_id | "Novel_003460"; exon_number | "1"; gene_type | " |
| scaffold1Cufflinks | exon | 197    | 298    | . | - | . | gene_id | "XLOC_245177"; transcript_id | "Novel_003460"; exon_number | "2"; gene_type | " |
| scaffold1Cufflinks | exon | 996    | 2635   | . | - | . | gene_id | "XLOC_245177"; transcript_id | "Novel_003460"; exon_number | "3"; gene_type | " |
| scaffold1Cufflinks | exon | 365945 | 366735 | . | + | . | gene_id | "XLOC_245234"; transcript_id | "Novel_003461"; exon_number | "1"; gene_type | " |
| scaffold1Cufflinks | exon | 366863 | 367090 | . | + | . | gene_id | "XLOC_245234"; transcript_id | "Novel_003461"; exon_number | "2"; gene_type | " |
| scaffold1Cufflinks | exon | 5      | 1081   | . | - | . | gene_id | "XLOC_245342"; transcript_id | "Novel_003462"; exon_number | "1"; gene_type | " |

|                    |      |        |        |   |   |   |                                                                                   |
|--------------------|------|--------|--------|---|---|---|-----------------------------------------------------------------------------------|
| scaffold1Cufflinks | exon | 1236   | 1578   | . | - | . | gene_id "XLOC_245342"; transcript_id "Novel_003462"; exon_number "2"; gene_type " |
| scaffold1Cufflinks | exon | 1658   | 1756   | . | - | . | gene_id "XLOC_245342"; transcript_id "Novel_003462"; exon_number "3"; gene_type " |
| scaffold1Cufflinks | exon | 2035   | 2152   | . | - | . | gene_id "XLOC_245342"; transcript_id "Novel_003462"; exon_number "4"; gene_type " |
| scaffold1Cufflinks | exon | 2233   | 2318   | . | - | . | gene_id "XLOC_245342"; transcript_id "Novel_003462"; exon_number "5"; gene_type " |
| scaffold1Cufflinks | exon | 2408   | 2476   | . | - | . | gene_id "XLOC_245342"; transcript_id "Novel_003462"; exon_number "6"; gene_type " |
| scaffold1Cufflinks | exon | 2556   | 2620   | . | - | . | gene_id "XLOC_245342"; transcript_id "Novel_003462"; exon_number "7"; gene_type " |
| scaffold1Cufflinks | exon | 16     | 1086   | . | - | . | gene_id "XLOC_245342"; transcript_id "Novel_003463"; exon_number "1"; gene_type " |
| scaffold1Cufflinks | exon | 1236   | 1578   | . | - | . | gene_id "XLOC_245342"; transcript_id "Novel_003463"; exon_number "2"; gene_type " |
| scaffold1Cufflinks | exon | 1658   | 1756   | . | - | . | gene_id "XLOC_245342"; transcript_id "Novel_003463"; exon_number "3"; gene_type " |
| scaffold1Cufflinks | exon | 2035   | 2152   | . | - | . | gene_id "XLOC_245342"; transcript_id "Novel_003463"; exon_number "4"; gene_type " |
| scaffold1Cufflinks | exon | 2233   | 2318   | . | - | . | gene_id "XLOC_245342"; transcript_id "Novel_003463"; exon_number "5"; gene_type " |
| scaffold1Cufflinks | exon | 2408   | 2476   | . | - | . | gene_id "XLOC_245342"; transcript_id "Novel_003463"; exon_number "6"; gene_type " |
| scaffold1Cufflinks | exon | 2556   | 2619   | . | - | . | gene_id "XLOC_245342"; transcript_id "Novel_003463"; exon_number "7"; gene_type " |
| scaffold1Cufflinks | exon | 14     | 158    | . | - | . | gene_id "XLOC_245369"; transcript_id "Novel_003464"; exon_number "1"; gene_type " |
| scaffold1Cufflinks | exon | 263    | 332    | . | - | . | gene_id "XLOC_245369"; transcript_id "Novel_003464"; exon_number "2"; gene_type " |
| scaffold1Cufflinks | exon | 660    | 816    | . | - | . | gene_id "XLOC_245369"; transcript_id "Novel_003464"; exon_number "3"; gene_type " |
| scaffold1Cufflinks | exon | 2120   | 2288   | . | - | . | gene_id "XLOC_245369"; transcript_id "Novel_003464"; exon_number "4"; gene_type " |
| scaffold1Cufflinks | exon | 14     | 158    | . | - | . | gene_id "XLOC_245369"; transcript_id "Novel_003465"; exon_number "1"; gene_type " |
| scaffold1Cufflinks | exon | 263    | 332    | . | - | . | gene_id "XLOC_245369"; transcript_id "Novel_003465"; exon_number "2"; gene_type " |
| scaffold1Cufflinks | exon | 2120   | 2311   | . | - | . | gene_id "XLOC_245369"; transcript_id "Novel_003465"; exon_number "3"; gene_type " |
| scaffold1Cufflinks | exon | 380936 | 381050 | . | + | . | gene_id "XLOC_245413"; transcript_id "Novel_003466"; exon_number "1"; gene_type " |
| scaffold1Cufflinks | exon | 381433 | 382105 | . | + | . | gene_id "XLOC_245413"; transcript_id "Novel_003466"; exon_number "2"; gene_type " |
| scaffold1Cufflinks | exon | 382348 | 382411 | . | + | . | gene_id "XLOC_245413"; transcript_id "Novel_003466"; exon_number "3"; gene_type " |
| scaffold1Cufflinks | exon | 382504 | 382557 | . | + | . | gene_id "XLOC_245413"; transcript_id "Novel_003466"; exon_number "4"; gene_type " |
| scaffold1Cufflinks | exon | 382811 | 382888 | . | + | . | gene_id "XLOC_245413"; transcript_id "Novel_003466"; exon_number "5"; gene_type " |
| scaffold1Cufflinks | exon | 383844 | 383907 | . | + | . | gene_id "XLOC_245413"; transcript_id "Novel_003466"; exon_number "6"; gene_type " |
| scaffold1Cufflinks | exon | 384100 | 384133 | . | + | . | gene_id "XLOC_245413"; transcript_id "Novel_003466"; exon_number "7"; gene_type " |
| scaffold1Cufflinks | exon | 478664 | 478760 | . | + | . | gene_id "XLOC_245434"; transcript_id "Novel_003467"; exon_number "1"; gene_type " |
| scaffold1Cufflinks | exon | 478943 | 479029 | . | + | . | gene_id "XLOC_245434"; transcript_id "Novel_003467"; exon_number "2"; gene_type " |
| scaffold1Cufflinks | exon | 479126 | 479179 | . | + | . | gene_id "XLOC_245434"; transcript_id "Novel_003467"; exon_number "3"; gene_type " |
| scaffold1Cufflinks | exon | 480046 | 482827 | . | + | . | gene_id "XLOC_245434"; transcript_id "Novel_003467"; exon_number "4"; gene_type " |
| scaffold1Cufflinks | exon | 483052 | 483512 | . | + | . | gene_id "XLOC_245434"; transcript_id "Novel_003467"; exon_number "5"; gene_type " |
| scaffold1Cufflinks | exon | 478664 | 478760 | . | + | . | gene_id "XLOC_245434"; transcript_id "Novel_003468"; exon_number "1"; gene_type " |
| scaffold1Cufflinks | exon | 478943 | 479029 | . | + | . | gene_id "XLOC_245434"; transcript_id "Novel_003468"; exon_number "2"; gene_type " |
| scaffold1Cufflinks | exon | 479126 | 483512 | . | + | . | gene_id "XLOC_245434"; transcript_id "Novel_003468"; exon_number "3"; gene_type " |



|                    |      |        |        |   |   |   |         |                              |                             |                |   |
|--------------------|------|--------|--------|---|---|---|---------|------------------------------|-----------------------------|----------------|---|
| scaffold1Cufflinks | exon | 765004 | 765850 | . | + | . | gene_id | "XLOC_245640"; transcript_id | "Novel_003469"; exon_number | "1"; gene_type | " |
| scaffold1Cufflinks | exon | 766759 | 767500 | . | + | . | gene_id | "XLOC_245640"; transcript_id | "Novel_003469"; exon_number | "2"; gene_type | " |
| scaffold1Cufflinks | exon | 409576 | 410086 | . | - | . | gene_id | "XLOC_245864"; transcript_id | "Novel_003470"; exon_number | "1"; gene_type | " |
| scaffold1Cufflinks | exon | 410164 | 410304 | . | - | . | gene_id | "XLOC_245864"; transcript_id | "Novel_003470"; exon_number | "2"; gene_type | " |
| scaffold1Cufflinks | exon | 411216 | 411338 | . | - | . | gene_id | "XLOC_245864"; transcript_id | "Novel_003470"; exon_number | "3"; gene_type | " |
| scaffold1Cufflinks | exon | 411988 | 412050 | . | - | . | gene_id | "XLOC_245864"; transcript_id | "Novel_003470"; exon_number | "4"; gene_type | " |
| scaffold1Cufflinks | exon | 412145 | 412220 | . | - | . | gene_id | "XLOC_245864"; transcript_id | "Novel_003470"; exon_number | "5"; gene_type | " |
| scaffold1Cufflinks | exon | 409609 | 410086 | . | - | . | gene_id | "XLOC_245864"; transcript_id | "Novel_003471"; exon_number | "1"; gene_type | " |
| scaffold1Cufflinks | exon | 411216 | 411338 | . | - | . | gene_id | "XLOC_245864"; transcript_id | "Novel_003471"; exon_number | "2"; gene_type | " |
| scaffold1Cufflinks | exon | 411988 | 412050 | . | - | . | gene_id | "XLOC_245864"; transcript_id | "Novel_003471"; exon_number | "3"; gene_type | " |
| scaffold1Cufflinks | exon | 412145 | 412207 | . | - | . | gene_id | "XLOC_245864"; transcript_id | "Novel_003471"; exon_number | "4"; gene_type | " |
| scaffold1Cufflinks | exon | 42821  | 44521  | . | - | . | gene_id | "XLOC_246174"; transcript_id | "Novel_003472"; exon_number | "1"; gene_type | " |
| scaffold1Cufflinks | exon | 21     | 121    | . | + | . | gene_id | "XLOC_246290"; transcript_id | "Novel_003473"; exon_number | "1"; gene_type | " |
| scaffold1Cufflinks | exon | 553    | 2325   | . | + | . | gene_id | "XLOC_246290"; transcript_id | "Novel_003473"; exon_number | "2"; gene_type | " |
| scaffold1Cufflinks | exon | 142825 | 143058 | . | + | . | gene_id | "XLOC_246447"; transcript_id | "Novel_003474"; exon_number | "1"; gene_type | " |
| scaffold1Cufflinks | exon | 143268 | 143360 | . | + | . | gene_id | "XLOC_246447"; transcript_id | "Novel_003474"; exon_number | "2"; gene_type | " |
| scaffold1Cufflinks | exon | 143481 | 143546 | . | + | . | gene_id | "XLOC_246447"; transcript_id | "Novel_003474"; exon_number | "3"; gene_type | " |
| scaffold1Cufflinks | exon | 28     | 90     | . | + | . | gene_id | "XLOC_246666"; transcript_id | "Novel_003475"; exon_number | "1"; gene_type | " |
| scaffold1Cufflinks | exon | 1682   | 1750   | . | + | . | gene_id | "XLOC_246666"; transcript_id | "Novel_003475"; exon_number | "2"; gene_type | " |
| scaffold1Cufflinks | exon | 1859   | 2023   | . | + | . | gene_id | "XLOC_246666"; transcript_id | "Novel_003475"; exon_number | "3"; gene_type | " |
| scaffold1Cufflinks | exon | 113890 | 114166 | . | + | . | gene_id | "XLOC_246684"; transcript_id | "Novel_003476"; exon_number | "1"; gene_type | " |
| scaffold1Cufflinks | exon | 114310 | 115309 | . | + | . | gene_id | "XLOC_246684"; transcript_id | "Novel_003476"; exon_number | "2"; gene_type | " |
| scaffold1Cufflinks | exon | 437312 | 437463 | . | + | . | gene_id | "XLOC_246706"; transcript_id | "Novel_003477"; exon_number | "1"; gene_type | " |
| scaffold1Cufflinks | exon | 437543 | 437987 | . | + | . | gene_id | "XLOC_246706"; transcript_id | "Novel_003477"; exon_number | "2"; gene_type | " |
| scaffold1Cufflinks | exon | 438192 | 438253 | . | + | . | gene_id | "XLOC_246706"; transcript_id | "Novel_003477"; exon_number | "3"; gene_type | " |
| scaffold1Cufflinks | exon | 438343 | 438417 | . | + | . | gene_id | "XLOC_246706"; transcript_id | "Novel_003477"; exon_number | "4"; gene_type | " |
| scaffold1Cufflinks | exon | 438521 | 438686 | . | + | . | gene_id | "XLOC_246706"; transcript_id | "Novel_003477"; exon_number | "5"; gene_type | " |
| scaffold1Cufflinks | exon | 438768 | 439426 | . | + | . | gene_id | "XLOC_246706"; transcript_id | "Novel_003477"; exon_number | "6"; gene_type | " |
| scaffold1Cufflinks | exon | 439775 | 440022 | . | + | . | gene_id | "XLOC_246707"; transcript_id | "Novel_003478"; exon_number | "1"; gene_type | " |
| scaffold1Cufflinks | exon | 440169 | 440325 | . | + | . | gene_id | "XLOC_246707"; transcript_id | "Novel_003478"; exon_number | "2"; gene_type | " |
| scaffold1Cufflinks | exon | 440442 | 440629 | . | + | . | gene_id | "XLOC_246707"; transcript_id | "Novel_003478"; exon_number | "3"; gene_type | " |
| scaffold1Cufflinks | exon | 747101 | 747167 | . | + | . | gene_id | "XLOC_246748"; transcript_id | "Novel_003479"; exon_number | "1"; gene_type | " |
| scaffold1Cufflinks | exon | 747260 | 747925 | . | + | . | gene_id | "XLOC_246748"; transcript_id | "Novel_003479"; exon_number | "2"; gene_type | " |
| scaffold1Cufflinks | exon | 782526 | 782886 | . | + | . | gene_id | "XLOC_246758"; transcript_id | "Novel_003480"; exon_number | "1"; gene_type | " |
| scaffold1Cufflinks | exon | 783703 | 786082 | . | + | . | gene_id | "XLOC_246758"; transcript_id | "Novel_003480"; exon_number | "2"; gene_type | " |

|                    |      |         |         |   |   |   |                                                                                   |
|--------------------|------|---------|---------|---|---|---|-----------------------------------------------------------------------------------|
| scaffold1Cufflinks | exon | 969112  | 969391  | . | + | . | gene_id "XLOC_246781"; transcript_id "Novel_003481"; exon_number "1"; gene_type " |
| scaffold1Cufflinks | exon | 970196  | 970232  | . | + | . | gene_id "XLOC_246781"; transcript_id "Novel_003481"; exon_number "2"; gene_type " |
| scaffold1Cufflinks | exon | 1177332 | 1177705 | . | + | . | gene_id "XLOC_246814"; transcript_id "Novel_003482"; exon_number "1"; gene_type " |
| scaffold1Cufflinks | exon | 1178601 | 1178890 | . | + | . | gene_id "XLOC_246814"; transcript_id "Novel_003482"; exon_number "2"; gene_type " |
| scaffold1Cufflinks | exon | 1178965 | 1179156 | . | + | . | gene_id "XLOC_246814"; transcript_id "Novel_003482"; exon_number "3"; gene_type " |
| scaffold1Cufflinks | exon | 1177372 | 1177705 | . | + | . | gene_id "XLOC_246814"; transcript_id "Novel_003483"; exon_number "1"; gene_type " |
| scaffold1Cufflinks | exon | 1178601 | 1178846 | . | + | . | gene_id "XLOC_246814"; transcript_id "Novel_003483"; exon_number "2"; gene_type " |
| scaffold1Cufflinks | exon | 1178965 | 1179201 | . | + | . | gene_id "XLOC_246814"; transcript_id "Novel_003483"; exon_number "3"; gene_type " |
| scaffold1Cufflinks | exon | 1179432 | 1179784 | . | + | . | gene_id "XLOC_246814"; transcript_id "Novel_003484"; exon_number "1"; gene_type " |
| scaffold1Cufflinks | exon | 1179898 | 1180911 | . | + | . | gene_id "XLOC_246814"; transcript_id "Novel_003484"; exon_number "2"; gene_type " |
| scaffold1Cufflinks | exon | 1304803 | 1304906 | . | + | . | gene_id "XLOC_246829"; transcript_id "Novel_003485"; exon_number "1"; gene_type " |
| scaffold1Cufflinks | exon | 1305031 | 1305156 | . | + | . | gene_id "XLOC_246829"; transcript_id "Novel_003485"; exon_number "2"; gene_type " |
| scaffold1Cufflinks | exon | 1305793 | 1305883 | . | + | . | gene_id "XLOC_246829"; transcript_id "Novel_003485"; exon_number "3"; gene_type " |
| scaffold1Cufflinks | exon | 1306176 | 1306562 | . | + | . | gene_id "XLOC_246829"; transcript_id "Novel_003485"; exon_number "4"; gene_type " |
| scaffold1Cufflinks | exon | 1421955 | 1422375 | . | + | . | gene_id "XLOC_246839"; transcript_id "Novel_003486"; exon_number "1"; gene_type " |
| scaffold1Cufflinks | exon | 1422967 | 1423307 | . | + | . | gene_id "XLOC_246839"; transcript_id "Novel_003486"; exon_number "2"; gene_type " |
| scaffold1Cufflinks | exon | 1594982 | 1595134 | . | + | . | gene_id "XLOC_246870"; transcript_id "Novel_003487"; exon_number "1"; gene_type " |
| scaffold1Cufflinks | exon | 1595276 | 1596056 | . | + | . | gene_id "XLOC_246870"; transcript_id "Novel_003487"; exon_number "2"; gene_type " |
| scaffold1Cufflinks | exon | 1596155 | 1596251 | . | + | . | gene_id "XLOC_246870"; transcript_id "Novel_003487"; exon_number "3"; gene_type " |
| scaffold1Cufflinks | exon | 1596342 | 1597180 | . | + | . | gene_id "XLOC_246870"; transcript_id "Novel_003487"; exon_number "4"; gene_type " |
| scaffold1Cufflinks | exon | 1594982 | 1595134 | . | + | . | gene_id "XLOC_246870"; transcript_id "Novel_003488"; exon_number "1"; gene_type " |
| scaffold1Cufflinks | exon | 1595276 | 1595751 | . | + | . | gene_id "XLOC_246870"; transcript_id "Novel_003488"; exon_number "2"; gene_type " |
| scaffold1Cufflinks | exon | 1595884 | 1596056 | . | + | . | gene_id "XLOC_246870"; transcript_id "Novel_003488"; exon_number "3"; gene_type " |
| scaffold1Cufflinks | exon | 1596155 | 1596251 | . | + | . | gene_id "XLOC_246870"; transcript_id "Novel_003488"; exon_number "4"; gene_type " |
| scaffold1Cufflinks | exon | 1596342 | 1597180 | . | + | . | gene_id "XLOC_246870"; transcript_id "Novel_003488"; exon_number "5"; gene_type " |
| scaffold1Cufflinks | exon | 1682020 | 1682168 | . | + | . | gene_id "XLOC_246870"; transcript_id "Novel_003489"; exon_number "1"; gene_type " |
| scaffold1Cufflinks | exon | 1682241 | 1682337 | . | + | . | gene_id "XLOC_246870"; transcript_id "Novel_003489"; exon_number "2"; gene_type " |
| scaffold1Cufflinks | exon | 1682421 | 1682574 | . | + | . | gene_id "XLOC_246870"; transcript_id "Novel_003489"; exon_number "3"; gene_type " |
| scaffold1Cufflinks | exon | 1682737 | 1683182 | . | + | . | gene_id "XLOC_246870"; transcript_id "Novel_003489"; exon_number "4"; gene_type " |
| scaffold1Cufflinks | exon | 1844747 | 1845500 | . | + | . | gene_id "XLOC_246907"; transcript_id "Novel_003490"; exon_number "1"; gene_type " |
| scaffold1Cufflinks | exon | 1846039 | 1846365 | . | + | . | gene_id "XLOC_246908"; transcript_id "Novel_003491"; exon_number "1"; gene_type " |
| scaffold1Cufflinks | exon | 86583   | 87385   | . | - | . | gene_id "XLOC_246939"; transcript_id "Novel_003492"; exon_number "1"; gene_type " |
| scaffold1Cufflinks | exon | 90597   | 91205   | . | - | . | gene_id "XLOC_246939"; transcript_id "Novel_003492"; exon_number "2"; gene_type " |
| scaffold1Cufflinks | exon | 288482  | 288509  | . | - | . | gene_id "XLOC_246969"; transcript_id "Novel_003493"; exon_number "1"; gene_type " |
| scaffold1Cufflinks | exon | 288638  | 288749  | . | - | . | gene_id "XLOC_246969"; transcript_id "Novel_003493"; exon_number "2"; gene_type " |

|                    |      |         |         |   |   |   |                                                                                   |
|--------------------|------|---------|---------|---|---|---|-----------------------------------------------------------------------------------|
| scaffold1Cufflinks | exon | 288848  | 289098  | . | - | . | gene_id "XLOC_246969"; transcript_id "Novel_003493"; exon_number "3"; gene_type " |
| scaffold1Cufflinks | exon | 348124  | 348217  | . | - | . | gene_id "XLOC_246981"; transcript_id "Novel_003494"; exon_number "1"; gene_type " |
| scaffold1Cufflinks | exon | 348756  | 349009  | . | - | . | gene_id "XLOC_246981"; transcript_id "Novel_003494"; exon_number "2"; gene_type " |
| scaffold1Cufflinks | exon | 350524  | 350595  | . | - | . | gene_id "XLOC_246981"; transcript_id "Novel_003494"; exon_number "3"; gene_type " |
| scaffold1Cufflinks | exon | 350686  | 350772  | . | - | . | gene_id "XLOC_246981"; transcript_id "Novel_003494"; exon_number "4"; gene_type " |
| scaffold1Cufflinks | exon | 350877  | 351050  | . | - | . | gene_id "XLOC_246981"; transcript_id "Novel_003494"; exon_number "5"; gene_type " |
| scaffold1Cufflinks | exon | 520451  | 520569  | . | - | . | gene_id "XLOC_246990"; transcript_id "Novel_003495"; exon_number "1"; gene_type " |
| scaffold1Cufflinks | exon | 521845  | 521955  | . | - | . | gene_id "XLOC_246990"; transcript_id "Novel_003495"; exon_number "2"; gene_type " |
| scaffold1Cufflinks | exon | 522458  | 523323  | . | - | . | gene_id "XLOC_246990"; transcript_id "Novel_003495"; exon_number "3"; gene_type " |
| scaffold1Cufflinks | exon | 644965  | 645973  | . | - | . | gene_id "XLOC_247027"; transcript_id "Novel_003496"; exon_number "1"; gene_type " |
| scaffold1Cufflinks | exon | 649074  | 649167  | . | - | . | gene_id "XLOC_247027"; transcript_id "Novel_003496"; exon_number "2"; gene_type " |
| scaffold1Cufflinks | exon | 645570  | 645984  | . | - | . | gene_id "XLOC_247027"; transcript_id "Novel_003497"; exon_number "1"; gene_type " |
| scaffold1Cufflinks | exon | 649074  | 649194  | . | - | . | gene_id "XLOC_247027"; transcript_id "Novel_003497"; exon_number "2"; gene_type " |
| scaffold1Cufflinks | exon | 757996  | 759071  | . | - | . | gene_id "XLOC_247036"; transcript_id "Novel_003498"; exon_number "1"; gene_type " |
| scaffold1Cufflinks | exon | 759184  | 759255  | . | - | . | gene_id "XLOC_247036"; transcript_id "Novel_003498"; exon_number "2"; gene_type " |
| scaffold1Cufflinks | exon | 759367  | 760164  | . | - | . | gene_id "XLOC_247036"; transcript_id "Novel_003498"; exon_number "3"; gene_type " |
| scaffold1Cufflinks | exon | 761459  | 761610  | . | - | . | gene_id "XLOC_247036"; transcript_id "Novel_003498"; exon_number "4"; gene_type " |
| scaffold1Cufflinks | exon | 758736  | 759728  | . | - | . | gene_id "XLOC_247036"; transcript_id "Novel_003499"; exon_number "1"; gene_type " |
| scaffold1Cufflinks | exon | 759954  | 760164  | . | - | . | gene_id "XLOC_247036"; transcript_id "Novel_003499"; exon_number "2"; gene_type " |
| scaffold1Cufflinks | exon | 761459  | 761571  | . | - | . | gene_id "XLOC_247036"; transcript_id "Novel_003499"; exon_number "3"; gene_type " |
| scaffold1Cufflinks | exon | 1480864 | 1481695 | . | - | . | gene_id "XLOC_247079"; transcript_id "Novel_003500"; exon_number "1"; gene_type " |
| scaffold1Cufflinks | exon | 1731948 | 1732274 | . | - | . | gene_id "XLOC_247099"; transcript_id "Novel_003501"; exon_number "1"; gene_type " |
| scaffold1Cufflinks | exon | 1732955 | 1733032 | . | - | . | gene_id "XLOC_247099"; transcript_id "Novel_003501"; exon_number "2"; gene_type " |
| scaffold1Cufflinks | exon | 1733127 | 1733173 | . | - | . | gene_id "XLOC_247099"; transcript_id "Novel_003501"; exon_number "3"; gene_type " |
| scaffold1Cufflinks | exon | 1733260 | 1733439 | . | - | . | gene_id "XLOC_247099"; transcript_id "Novel_003501"; exon_number "4"; gene_type " |
| scaffold1Cufflinks | exon | 1733644 | 1733769 | . | - | . | gene_id "XLOC_247099"; transcript_id "Novel_003501"; exon_number "5"; gene_type " |
| scaffold1Cufflinks | exon | 1734019 | 1734105 | . | - | . | gene_id "XLOC_247099"; transcript_id "Novel_003501"; exon_number "6"; gene_type " |
| scaffold1Cufflinks | exon | 1734347 | 1734744 | . | - | . | gene_id "XLOC_247099"; transcript_id "Novel_003501"; exon_number "7"; gene_type " |
| scaffold1Cufflinks | exon | 478656  | 478867  | . | - | . | gene_id "XLOC_247265"; transcript_id "Novel_003502"; exon_number "1"; gene_type " |
| scaffold1Cufflinks | exon | 509155  | 511119  | . | + | . | gene_id "XLOC_247429"; transcript_id "Novel_003503"; exon_number "1"; gene_type " |
| scaffold1Cufflinks | exon | 513646  | 513972  | . | + | . | gene_id "XLOC_247429"; transcript_id "Novel_003503"; exon_number "2"; gene_type " |
| scaffold1Cufflinks | exon | 514062  | 514126  | . | + | . | gene_id "XLOC_247429"; transcript_id "Novel_003503"; exon_number "3"; gene_type " |
| scaffold1Cufflinks | exon | 438573  | 438974  | . | - | . | gene_id "XLOC_247499"; transcript_id "Novel_003504"; exon_number "1"; gene_type " |
| scaffold1Cufflinks | exon | 439058  | 440285  | . | - | . | gene_id "XLOC_247499"; transcript_id "Novel_003504"; exon_number "2"; gene_type " |
| scaffold1Cufflinks | exon | 33140   | 33313   | . | + | . | gene_id "XLOC_247544"; transcript_id "Novel_003505"; exon_number "1"; gene_type " |

|                    |      |        |        |   |   |   |                                                                                   |
|--------------------|------|--------|--------|---|---|---|-----------------------------------------------------------------------------------|
| scaffold1Cufflinks | exon | 33641  | 34261  | . | + | . | gene_id "XLOC_247544"; transcript_id "Novel_003505"; exon_number "2"; gene_type " |
| scaffold1Cufflinks | exon | 404940 | 405511 | . | + | . | gene_id "XLOC_247590"; transcript_id "Novel_003506"; exon_number "1"; gene_type " |
| scaffold1Cufflinks | exon | 131688 | 131968 | . | + | . | gene_id "XLOC_247746"; transcript_id "Novel_003507"; exon_number "1"; gene_type " |
| scaffold1Cufflinks | exon | 150316 | 152178 | . | + | . | gene_id "XLOC_247746"; transcript_id "Novel_003507"; exon_number "2"; gene_type " |
| scaffold1Cufflinks | exon | 154016 | 154265 | . | + | . | gene_id "XLOC_247746"; transcript_id "Novel_003507"; exon_number "3"; gene_type " |
| scaffold1Cufflinks | exon | 131690 | 131968 | . | + | . | gene_id "XLOC_247746"; transcript_id "Novel_003508"; exon_number "1"; gene_type " |
| scaffold1Cufflinks | exon | 150316 | 152563 | . | + | . | gene_id "XLOC_247746"; transcript_id "Novel_003508"; exon_number "2"; gene_type " |
| scaffold1Cufflinks | exon | 133675 | 133953 | . | + | . | gene_id "XLOC_247746"; transcript_id "Novel_003509"; exon_number "1"; gene_type " |
| scaffold1Cufflinks | exon | 150316 | 152178 | . | + | . | gene_id "XLOC_247746"; transcript_id "Novel_003509"; exon_number "2"; gene_type " |
| scaffold1Cufflinks | exon | 154016 | 154255 | . | + | . | gene_id "XLOC_247746"; transcript_id "Novel_003509"; exon_number "3"; gene_type " |
| scaffold1Cufflinks | exon | 305499 | 305979 | . | + | . | gene_id "XLOC_247777"; transcript_id "Novel_003510"; exon_number "1"; gene_type " |
| scaffold1Cufflinks | exon | 306086 | 306298 | . | + | . | gene_id "XLOC_247777"; transcript_id "Novel_003510"; exon_number "2"; gene_type " |
| scaffold1Cufflinks | exon | 307312 | 307337 | . | + | . | gene_id "XLOC_247777"; transcript_id "Novel_003510"; exon_number "3"; gene_type " |
| scaffold1Cufflinks | exon | 307412 | 307648 | . | + | . | gene_id "XLOC_247777"; transcript_id "Novel_003510"; exon_number "4"; gene_type " |
| scaffold1Cufflinks | exon | 307288 | 307337 | . | + | . | gene_id "XLOC_247777"; transcript_id "Novel_003511"; exon_number "1"; gene_type " |
| scaffold1Cufflinks | exon | 307412 | 307648 | . | + | . | gene_id "XLOC_247777"; transcript_id "Novel_003511"; exon_number "2"; gene_type " |
| scaffold1Cufflinks | exon | 31284  | 32051  | . | - | . | gene_id "XLOC_247803"; transcript_id "Novel_003512"; exon_number "1"; gene_type " |
| scaffold1Cufflinks | exon | 32631  | 32914  | . | - | . | gene_id "XLOC_247803"; transcript_id "Novel_003512"; exon_number "2"; gene_type " |
| scaffold1Cufflinks | exon | 33001  | 33365  | . | - | . | gene_id "XLOC_247803"; transcript_id "Novel_003512"; exon_number "3"; gene_type " |
| scaffold1Cufflinks | exon | 453642 | 454766 | . | - | . | gene_id "XLOC_247847"; transcript_id "Novel_003513"; exon_number "1"; gene_type " |
| scaffold1Cufflinks | exon | 456945 | 457136 | . | - | . | gene_id "XLOC_247847"; transcript_id "Novel_003513"; exon_number "2"; gene_type " |
| scaffold1Cufflinks | exon | 445209 | 445417 | . | - | . | gene_id "XLOC_247848"; transcript_id "Novel_003514"; exon_number "1"; gene_type " |
| scaffold1Cufflinks | exon | 20     | 234    | . | - | . | gene_id "XLOC_247944"; transcript_id "Novel_003515"; exon_number "1"; gene_type " |
| scaffold1Cufflinks | exon | 320    | 1287   | . | - | . | gene_id "XLOC_247944"; transcript_id "Novel_003515"; exon_number "2"; gene_type " |
| scaffold1Cufflinks | exon | 1728   | 1881   | . | - | . | gene_id "XLOC_247944"; transcript_id "Novel_003515"; exon_number "3"; gene_type " |
| scaffold1Cufflinks | exon | 20     | 561    | . | - | . | gene_id "XLOC_247944"; transcript_id "Novel_003516"; exon_number "1"; gene_type " |
| scaffold1Cufflinks | exon | 1202   | 1287   | . | - | . | gene_id "XLOC_247944"; transcript_id "Novel_003516"; exon_number "2"; gene_type " |
| scaffold1Cufflinks | exon | 1728   | 1881   | . | - | . | gene_id "XLOC_247944"; transcript_id "Novel_003516"; exon_number "3"; gene_type " |
| scaffold1Cufflinks | exon | 48     | 83     | . | - | . | gene_id "XLOC_247944"; transcript_id "Novel_003517"; exon_number "1"; gene_type " |
| scaffold1Cufflinks | exon | 172    | 234    | . | - | . | gene_id "XLOC_247944"; transcript_id "Novel_003517"; exon_number "2"; gene_type " |
| scaffold1Cufflinks | exon | 320    | 392    | . | - | . | gene_id "XLOC_247944"; transcript_id "Novel_003517"; exon_number "3"; gene_type " |
| scaffold1Cufflinks | exon | 497    | 561    | . | - | . | gene_id "XLOC_247944"; transcript_id "Novel_003517"; exon_number "4"; gene_type " |
| scaffold1Cufflinks | exon | 1202   | 1287   | . | - | . | gene_id "XLOC_247944"; transcript_id "Novel_003517"; exon_number "5"; gene_type " |
| scaffold1Cufflinks | exon | 1728   | 1840   | . | - | . | gene_id "XLOC_247944"; transcript_id "Novel_003517"; exon_number "6"; gene_type " |
| scaffold1Cufflinks | exon | 206606 | 206806 | . | + | . | gene_id "XLOC_248132"; transcript_id "Novel_003518"; exon_number "1"; gene_type " |

|                    |      |         |         |   |   |   |                                                                                   |
|--------------------|------|---------|---------|---|---|---|-----------------------------------------------------------------------------------|
| scaffold1Cufflinks | exon | 232695  | 233968  | . | - | . | gene_id "XLOC_248145"; transcript_id "Novel_003519"; exon_number "1"; gene_type " |
| scaffold1Cufflinks | exon | 236071  | 236198  | . | - | . | gene_id "XLOC_248145"; transcript_id "Novel_003519"; exon_number "2"; gene_type " |
| scaffold1Cufflinks | exon | 236289  | 236654  | . | - | . | gene_id "XLOC_248145"; transcript_id "Novel_003519"; exon_number "3"; gene_type " |
| scaffold1Cufflinks | exon | 233496  | 233968  | . | - | . | gene_id "XLOC_248145"; transcript_id "Novel_003520"; exon_number "1"; gene_type " |
| scaffold1Cufflinks | exon | 236071  | 236198  | . | - | . | gene_id "XLOC_248145"; transcript_id "Novel_003520"; exon_number "2"; gene_type " |
| scaffold1Cufflinks | exon | 236289  | 236389  | . | - | . | gene_id "XLOC_248145"; transcript_id "Novel_003520"; exon_number "3"; gene_type " |
| scaffold1Cufflinks | exon | 236465  | 236648  | . | - | . | gene_id "XLOC_248145"; transcript_id "Novel_003520"; exon_number "4"; gene_type " |
| scaffold1Cufflinks | exon | 234546  | 236198  | . | - | . | gene_id "XLOC_248145"; transcript_id "Novel_003521"; exon_number "1"; gene_type " |
| scaffold1Cufflinks | exon | 236289  | 236389  | . | - | . | gene_id "XLOC_248145"; transcript_id "Novel_003521"; exon_number "2"; gene_type " |
| scaffold1Cufflinks | exon | 236465  | 236626  | . | - | . | gene_id "XLOC_248145"; transcript_id "Novel_003521"; exon_number "3"; gene_type " |
| scaffold1Cufflinks | exon | 1622865 | 1623396 | . | - | . | gene_id "XLOC_248744"; transcript_id "Novel_003522"; exon_number "1"; gene_type " |
| scaffold1Cufflinks | exon | 1624538 | 1625683 | . | - | . | gene_id "XLOC_248744"; transcript_id "Novel_003522"; exon_number "2"; gene_type " |
| scaffold1Cufflinks | exon | 1622865 | 1623378 | . | - | . | gene_id "XLOC_248744"; transcript_id "Novel_003523"; exon_number "1"; gene_type " |
| scaffold1Cufflinks | exon | 1624538 | 1625683 | . | - | . | gene_id "XLOC_248744"; transcript_id "Novel_003523"; exon_number "2"; gene_type " |
| scaffold1Cufflinks | exon | 193468  | 193634  | . | - | . | gene_id "XLOC_248938"; transcript_id "Novel_003524"; exon_number "1"; gene_type " |
| scaffold1Cufflinks | exon | 194048  | 194236  | . | - | . | gene_id "XLOC_248938"; transcript_id "Novel_003524"; exon_number "2"; gene_type " |
| scaffold1Cufflinks | exon | 194330  | 194480  | . | - | . | gene_id "XLOC_248938"; transcript_id "Novel_003524"; exon_number "3"; gene_type " |
| scaffold1Cufflinks | exon | 93368   | 94084   | . | + | . | gene_id "XLOC_249006"; transcript_id "Novel_003525"; exon_number "1"; gene_type " |
| scaffold1Cufflinks | exon | 154263  | 154410  | . | + | . | gene_id "XLOC_249014"; transcript_id "Novel_003526"; exon_number "1"; gene_type " |
| scaffold1Cufflinks | exon | 154503  | 154633  | . | + | . | gene_id "XLOC_249014"; transcript_id "Novel_003526"; exon_number "2"; gene_type " |
| scaffold1Cufflinks | exon | 155335  | 155462  | . | + | . | gene_id "XLOC_249014"; transcript_id "Novel_003526"; exon_number "3"; gene_type " |
| scaffold1Cufflinks | exon | 155543  | 155647  | . | + | . | gene_id "XLOC_249014"; transcript_id "Novel_003526"; exon_number "4"; gene_type " |
| scaffold1Cufflinks | exon | 156064  | 156416  | . | + | . | gene_id "XLOC_249014"; transcript_id "Novel_003526"; exon_number "5"; gene_type " |
| scaffold1Cufflinks | exon | 331842  | 332250  | . | + | . | gene_id "XLOC_249572"; transcript_id "Novel_003527"; exon_number "1"; gene_type " |
| scaffold1Cufflinks | exon | 344723  | 344947  | . | + | . | gene_id "XLOC_249577"; transcript_id "Novel_003528"; exon_number "1"; gene_type " |
| scaffold1Cufflinks | exon | 345801  | 346884  | . | + | . | gene_id "XLOC_249577"; transcript_id "Novel_003528"; exon_number "2"; gene_type " |
| scaffold1Cufflinks | exon | 226844  | 227086  | . | + | . | gene_id "XLOC_249661"; transcript_id "Novel_003529"; exon_number "1"; gene_type " |
| scaffold1Cufflinks | exon | 227170  | 227938  | . | + | . | gene_id "XLOC_249661"; transcript_id "Novel_003529"; exon_number "2"; gene_type " |
| scaffold1Cufflinks | exon | 53844   | 54054   | . | + | . | gene_id "XLOC_249752"; transcript_id "Novel_003530"; exon_number "1"; gene_type " |
| scaffold1Cufflinks | exon | 72576   | 72840   | . | + | . | gene_id "XLOC_249757"; transcript_id "Novel_003531"; exon_number "1"; gene_type " |
| scaffold1Cufflinks | exon | 1581435 | 1582797 | . | + | . | gene_id "XLOC_250053"; transcript_id "Novel_003532"; exon_number "1"; gene_type " |
| scaffold1Cufflinks | exon | 1582960 | 1583997 | . | + | . | gene_id "XLOC_250053"; transcript_id "Novel_003532"; exon_number "2"; gene_type " |
| scaffold1Cufflinks | exon | 1581442 | 1581569 | . | + | . | gene_id "XLOC_250053"; transcript_id "Novel_003533"; exon_number "1"; gene_type " |
| scaffold1Cufflinks | exon | 1581892 | 1582797 | . | + | . | gene_id "XLOC_250053"; transcript_id "Novel_003533"; exon_number "2"; gene_type " |
| scaffold1Cufflinks | exon | 1582960 | 1583946 | . | + | . | gene_id "XLOC_250053"; transcript_id "Novel_003533"; exon_number "3"; gene_type " |



|                    |      |         |         |   |   |   |                                                                                   |
|--------------------|------|---------|---------|---|---|---|-----------------------------------------------------------------------------------|
| scaffold1Cufflinks | exon | 30247   | 30397   | . | - | . | gene_id "XLOC_250282"; transcript_id "Novel_003541"; exon_number "3"; gene_type " |
| scaffold1Cufflinks | exon | 30465   | 30524   | . | - | . | gene_id "XLOC_250282"; transcript_id "Novel_003541"; exon_number "4"; gene_type " |
| scaffold1Cufflinks | exon | 30908   | 30987   | . | - | . | gene_id "XLOC_250282"; transcript_id "Novel_003541"; exon_number "5"; gene_type " |
| scaffold1Cufflinks | exon | 31226   | 31401   | . | - | . | gene_id "XLOC_250282"; transcript_id "Novel_003541"; exon_number "6"; gene_type " |
| scaffold1Cufflinks | exon | 31619   | 31913   | . | - | . | gene_id "XLOC_250282"; transcript_id "Novel_003541"; exon_number "7"; gene_type " |
| scaffold1Cufflinks | exon | 28814   | 29140   | . | - | . | gene_id "XLOC_250282"; transcript_id "Novel_003542"; exon_number "1"; gene_type " |
| scaffold1Cufflinks | exon | 29399   | 29770   | . | - | . | gene_id "XLOC_250282"; transcript_id "Novel_003542"; exon_number "2"; gene_type " |
| scaffold1Cufflinks | exon | 29871   | 29966   | . | - | . | gene_id "XLOC_250282"; transcript_id "Novel_003542"; exon_number "3"; gene_type " |
| scaffold1Cufflinks | exon | 30247   | 30397   | . | - | . | gene_id "XLOC_250282"; transcript_id "Novel_003542"; exon_number "4"; gene_type " |
| scaffold1Cufflinks | exon | 30465   | 30524   | . | - | . | gene_id "XLOC_250282"; transcript_id "Novel_003542"; exon_number "5"; gene_type " |
| scaffold1Cufflinks | exon | 30908   | 30987   | . | - | . | gene_id "XLOC_250282"; transcript_id "Novel_003542"; exon_number "6"; gene_type " |
| scaffold1Cufflinks | exon | 31226   | 31401   | . | - | . | gene_id "XLOC_250282"; transcript_id "Novel_003542"; exon_number "7"; gene_type " |
| scaffold1Cufflinks | exon | 31619   | 31914   | . | - | . | gene_id "XLOC_250282"; transcript_id "Novel_003542"; exon_number "8"; gene_type " |
| scaffold1Cufflinks | exon | 220872  | 221196  | . | + | . | gene_id "XLOC_250331"; transcript_id "Novel_003543"; exon_number "1"; gene_type " |
| scaffold1Cufflinks | exon | 221278  | 221303  | . | + | . | gene_id "XLOC_250331"; transcript_id "Novel_003543"; exon_number "2"; gene_type " |
| scaffold1Cufflinks | exon | 222078  | 222167  | . | + | . | gene_id "XLOC_250331"; transcript_id "Novel_003543"; exon_number "3"; gene_type " |
| scaffold1Cufflinks | exon | 222266  | 222354  | . | + | . | gene_id "XLOC_250331"; transcript_id "Novel_003543"; exon_number "4"; gene_type " |
| scaffold1Cufflinks | exon | 223111  | 223579  | . | + | . | gene_id "XLOC_250331"; transcript_id "Novel_003543"; exon_number "5"; gene_type " |
| scaffold1Cufflinks | exon | 74556   | 74786   | . | + | . | gene_id "XLOC_250494"; transcript_id "Novel_003544"; exon_number "1"; gene_type " |
| scaffold1Cufflinks | exon | 74879   | 75068   | . | + | . | gene_id "XLOC_250494"; transcript_id "Novel_003544"; exon_number "2"; gene_type " |
| scaffold1Cufflinks | exon | 75983   | 76126   | . | + | . | gene_id "XLOC_250494"; transcript_id "Novel_003544"; exon_number "3"; gene_type " |
| scaffold1Cufflinks | exon | 1711721 | 1712102 | . | + | . | gene_id "XLOC_250706"; transcript_id "Novel_003545"; exon_number "1"; gene_type " |
| scaffold1Cufflinks | exon | 1712857 | 1712986 | . | + | . | gene_id "XLOC_250706"; transcript_id "Novel_003545"; exon_number "2"; gene_type " |
| scaffold1Cufflinks | exon | 1713742 | 1713879 | . | + | . | gene_id "XLOC_250706"; transcript_id "Novel_003545"; exon_number "3"; gene_type " |
| scaffold1Cufflinks | exon | 1714273 | 1714605 | . | + | . | gene_id "XLOC_250706"; transcript_id "Novel_003545"; exon_number "4"; gene_type " |
| scaffold1Cufflinks | exon | 1714964 | 1715147 | . | + | . | gene_id "XLOC_250706"; transcript_id "Novel_003545"; exon_number "5"; gene_type " |
| scaffold1Cufflinks | exon | 1715236 | 1715937 | . | + | . | gene_id "XLOC_250706"; transcript_id "Novel_003545"; exon_number "6"; gene_type " |
| scaffold1Cufflinks | exon | 1711832 | 1712102 | . | + | . | gene_id "XLOC_250706"; transcript_id "Novel_003546"; exon_number "1"; gene_type " |
| scaffold1Cufflinks | exon | 1712857 | 1714605 | . | + | . | gene_id "XLOC_250706"; transcript_id "Novel_003546"; exon_number "2"; gene_type " |
| scaffold1Cufflinks | exon | 1714964 | 1715147 | . | + | . | gene_id "XLOC_250706"; transcript_id "Novel_003546"; exon_number "3"; gene_type " |
| scaffold1Cufflinks | exon | 1715236 | 1715906 | . | + | . | gene_id "XLOC_250706"; transcript_id "Novel_003546"; exon_number "4"; gene_type " |
| scaffold1Cufflinks | exon | 1712567 | 1712986 | . | + | . | gene_id "XLOC_250706"; transcript_id "Novel_003547"; exon_number "1"; gene_type " |
| scaffold1Cufflinks | exon | 1713742 | 1713879 | . | + | . | gene_id "XLOC_250706"; transcript_id "Novel_003547"; exon_number "2"; gene_type " |
| scaffold1Cufflinks | exon | 1714273 | 1714605 | . | + | . | gene_id "XLOC_250706"; transcript_id "Novel_003547"; exon_number "3"; gene_type " |
| scaffold1Cufflinks | exon | 1714964 | 1715147 | . | + | . | gene_id "XLOC_250706"; transcript_id "Novel_003547"; exon_number "4"; gene_type " |

|                    |      |         |         |   |   |   |         |                |               |                 |             |      |           |   |
|--------------------|------|---------|---------|---|---|---|---------|----------------|---------------|-----------------|-------------|------|-----------|---|
| scaffold1Cufflinks | exon | 1715236 | 1715906 | . | + | . | gene_id | "XLOC_250706"; | transcript_id | "Novel_003547"; | exon_number | "5"; | gene_type | " |
| scaffold1Cufflinks | exon | 1270570 | 1272465 | . | - | . | gene_id | "XLOC_250903"; | transcript_id | "Novel_003548"; | exon_number | "1"; | gene_type | " |
| scaffold1Cufflinks | exon | 1272560 | 1273419 | . | - | . | gene_id | "XLOC_250903"; | transcript_id | "Novel_003548"; | exon_number | "2"; | gene_type | " |
| scaffold1Cufflinks | exon | 1270570 | 1272465 | . | - | . | gene_id | "XLOC_250903"; | transcript_id | "Novel_003549"; | exon_number | "1"; | gene_type | " |
| scaffold1Cufflinks | exon | 1272587 | 1273419 | . | - | . | gene_id | "XLOC_250903"; | transcript_id | "Novel_003549"; | exon_number | "2"; | gene_type | " |
| scaffold1Cufflinks | exon | 190353  | 193039  | . | - | . | gene_id | "XLOC_251109"; | transcript_id | "Novel_003550"; | exon_number | "1"; | gene_type | " |
| scaffold1Cufflinks | exon | 193231  | 193385  | . | - | . | gene_id | "XLOC_251109"; | transcript_id | "Novel_003550"; | exon_number | "2"; | gene_type | " |
| scaffold1Cufflinks | exon | 193592  | 195480  | . | - | . | gene_id | "XLOC_251109"; | transcript_id | "Novel_003550"; | exon_number | "3"; | gene_type | " |
| scaffold1Cufflinks | exon | 190368  | 192675  | . | - | . | gene_id | "XLOC_251109"; | transcript_id | "Novel_003551"; | exon_number | "1"; | gene_type | " |
| scaffold1Cufflinks | exon | 192764  | 195384  | . | - | . | gene_id | "XLOC_251109"; | transcript_id | "Novel_003551"; | exon_number | "2"; | gene_type | " |
| scaffold1Cufflinks | exon | 190368  | 193039  | . | - | . | gene_id | "XLOC_251109"; | transcript_id | "Novel_003552"; | exon_number | "1"; | gene_type | " |
| scaffold1Cufflinks | exon | 193231  | 195384  | . | - | . | gene_id | "XLOC_251109"; | transcript_id | "Novel_003552"; | exon_number | "2"; | gene_type | " |
| scaffold1Cufflinks | exon | 190391  | 193385  | . | - | . | gene_id | "XLOC_251109"; | transcript_id | "Novel_003553"; | exon_number | "1"; | gene_type | " |
| scaffold1Cufflinks | exon | 193592  | 195401  | . | - | . | gene_id | "XLOC_251109"; | transcript_id | "Novel_003553"; | exon_number | "2"; | gene_type | " |
| scaffold1Cufflinks | exon | 352543  | 353255  | . | - | . | gene_id | "XLOC_251142"; | transcript_id | "Novel_003554"; | exon_number | "1"; | gene_type | " |
| scaffold1Cufflinks | exon | 353347  | 353460  | . | - | . | gene_id | "XLOC_251142"; | transcript_id | "Novel_003554"; | exon_number | "2"; | gene_type | " |
| scaffold1Cufflinks | exon | 237835  | 238061  | . | + | . | gene_id | "XLOC_251455"; | transcript_id | "Novel_003555"; | exon_number | "1"; | gene_type | " |
| scaffold1Cufflinks | exon | 238767  | 240193  | . | + | . | gene_id | "XLOC_251455"; | transcript_id | "Novel_003555"; | exon_number | "2"; | gene_type | " |
| scaffold1Cufflinks | exon | 345306  | 345922  | . | - | . | gene_id | "XLOC_251548"; | transcript_id | "Novel_003556"; | exon_number | "1"; | gene_type | " |
| scaffold1Cufflinks | exon | 347247  | 348124  | . | - | . | gene_id | "XLOC_251548"; | transcript_id | "Novel_003556"; | exon_number | "2"; | gene_type | " |
| scaffold1Cufflinks | exon | 122479  | 122895  | . | - | . | gene_id | "XLOC_251904"; | transcript_id | "Novel_003557"; | exon_number | "1"; | gene_type | " |
| scaffold1Cufflinks | exon | 122980  | 123075  | . | - | . | gene_id | "XLOC_251904"; | transcript_id | "Novel_003557"; | exon_number | "2"; | gene_type | " |
| scaffold1Cufflinks | exon | 123713  | 123888  | . | - | . | gene_id | "XLOC_251904"; | transcript_id | "Novel_003557"; | exon_number | "3"; | gene_type | " |
| scaffold1Cufflinks | exon | 124379  | 124493  | . | - | . | gene_id | "XLOC_251904"; | transcript_id | "Novel_003557"; | exon_number | "4"; | gene_type | " |
| scaffold1Cufflinks | exon | 125339  | 125664  | . | - | . | gene_id | "XLOC_251904"; | transcript_id | "Novel_003557"; | exon_number | "5"; | gene_type | " |
| scaffold1Cufflinks | exon | 76325   | 79224   | . | - | . | gene_id | "XLOC_251974"; | transcript_id | "Novel_003558"; | exon_number | "1"; | gene_type | " |
| scaffold1Cufflinks | exon | 79866   | 81800   | . | - | . | gene_id | "XLOC_251974"; | transcript_id | "Novel_003558"; | exon_number | "2"; | gene_type | " |
| scaffold1Cufflinks | exon | 76739   | 77646   | . | - | . | gene_id | "XLOC_251974"; | transcript_id | "Novel_003559"; | exon_number | "1"; | gene_type | " |
| scaffold1Cufflinks | exon | 77900   | 79224   | . | - | . | gene_id | "XLOC_251974"; | transcript_id | "Novel_003559"; | exon_number | "2"; | gene_type | " |
| scaffold1Cufflinks | exon | 79866   | 81621   | . | - | . | gene_id | "XLOC_251974"; | transcript_id | "Novel_003559"; | exon_number | "3"; | gene_type | " |
| scaffold1Cufflinks | exon | 76739   | 77646   | . | - | . | gene_id | "XLOC_251974"; | transcript_id | "Novel_003560"; | exon_number | "1"; | gene_type | " |
| scaffold1Cufflinks | exon | 77900   | 79224   | . | - | . | gene_id | "XLOC_251974"; | transcript_id | "Novel_003560"; | exon_number | "2"; | gene_type | " |
| scaffold1Cufflinks | exon | 79866   | 81155   | . | - | . | gene_id | "XLOC_251974"; | transcript_id | "Novel_003560"; | exon_number | "3"; | gene_type | " |
| scaffold1Cufflinks | exon | 81249   | 81621   | . | - | . | gene_id | "XLOC_251974"; | transcript_id | "Novel_003560"; | exon_number | "4"; | gene_type | " |
| scaffold1Cufflinks | exon | 43579   | 43792   | . | + | . | gene_id | "XLOC_251996"; | transcript_id | "Novel_003561"; | exon_number | "1"; | gene_type | " |



|                    |      |        |        |   |   |   |         |                |               |                 |             |      |           |   |
|--------------------|------|--------|--------|---|---|---|---------|----------------|---------------|-----------------|-------------|------|-----------|---|
| scaffold1Cufflinks | exon | 44067  | 44101  | . | + | . | gene_id | "XLOC_251996"; | transcript_id | "Novel_003561"; | exon_number | "2"; | gene_type | " |
| scaffold1Cufflinks | exon | 70637  | 70848  | . | + | . | gene_id | "XLOC_252001"; | transcript_id | "Novel_003562"; | exon_number | "1"; | gene_type | " |
| scaffold1Cufflinks | exon | 70935  | 70997  | . | + | . | gene_id | "XLOC_252001"; | transcript_id | "Novel_003562"; | exon_number | "2"; | gene_type | " |
| scaffold1Cufflinks | exon | 71080  | 71195  | . | + | . | gene_id | "XLOC_252001"; | transcript_id | "Novel_003562"; | exon_number | "3"; | gene_type | " |
| scaffold1Cufflinks | exon | 71272  | 71330  | . | + | . | gene_id | "XLOC_252001"; | transcript_id | "Novel_003562"; | exon_number | "4"; | gene_type | " |
| scaffold1Cufflinks | exon | 71418  | 71920  | . | + | . | gene_id | "XLOC_252001"; | transcript_id | "Novel_003562"; | exon_number | "5"; | gene_type | " |
| scaffold1Cufflinks | exon | 335644 | 336709 | . | - | . | gene_id | "XLOC_252057"; | transcript_id | "Novel_003563"; | exon_number | "1"; | gene_type | " |
| scaffold1Cufflinks | exon | 336949 | 337010 | . | - | . | gene_id | "XLOC_252057"; | transcript_id | "Novel_003563"; | exon_number | "2"; | gene_type | " |
| scaffold1Cufflinks | exon | 337363 | 337402 | . | - | . | gene_id | "XLOC_252057"; | transcript_id | "Novel_003563"; | exon_number | "3"; | gene_type | " |
| scaffold1Cufflinks | exon | 337515 | 338417 | . | - | . | gene_id | "XLOC_252057"; | transcript_id | "Novel_003563"; | exon_number | "4"; | gene_type | " |
| scaffold1Cufflinks | exon | 338715 | 338784 | . | - | . | gene_id | "XLOC_252057"; | transcript_id | "Novel_003563"; | exon_number | "5"; | gene_type | " |
| scaffold1Cufflinks | exon | 339021 | 339173 | . | - | . | gene_id | "XLOC_252057"; | transcript_id | "Novel_003563"; | exon_number | "6"; | gene_type | " |
| scaffold1Cufflinks | exon | 339668 | 339844 | . | - | . | gene_id | "XLOC_252057"; | transcript_id | "Novel_003563"; | exon_number | "7"; | gene_type | " |
| scaffold1Cufflinks | exon | 340023 | 340268 | . | - | . | gene_id | "XLOC_252057"; | transcript_id | "Novel_003563"; | exon_number | "8"; | gene_type | " |
| scaffold1Cufflinks | exon | 336656 | 336709 | . | - | . | gene_id | "XLOC_252057"; | transcript_id | "Novel_003564"; | exon_number | "1"; | gene_type | " |
| scaffold1Cufflinks | exon | 336949 | 337010 | . | - | . | gene_id | "XLOC_252057"; | transcript_id | "Novel_003564"; | exon_number | "2"; | gene_type | " |
| scaffold1Cufflinks | exon | 337363 | 337402 | . | - | . | gene_id | "XLOC_252057"; | transcript_id | "Novel_003564"; | exon_number | "3"; | gene_type | " |
| scaffold1Cufflinks | exon | 337515 | 337628 | . | - | . | gene_id | "XLOC_252057"; | transcript_id | "Novel_003564"; | exon_number | "4"; | gene_type | " |
| scaffold1Cufflinks | exon | 338259 | 338417 | . | - | . | gene_id | "XLOC_252057"; | transcript_id | "Novel_003564"; | exon_number | "5"; | gene_type | " |
| scaffold1Cufflinks | exon | 338715 | 338784 | . | - | . | gene_id | "XLOC_252057"; | transcript_id | "Novel_003564"; | exon_number | "6"; | gene_type | " |
| scaffold1Cufflinks | exon | 339021 | 339173 | . | - | . | gene_id | "XLOC_252057"; | transcript_id | "Novel_003564"; | exon_number | "7"; | gene_type | " |
| scaffold1Cufflinks | exon | 339668 | 339844 | . | - | . | gene_id | "XLOC_252057"; | transcript_id | "Novel_003564"; | exon_number | "8"; | gene_type | " |
| scaffold1Cufflinks | exon | 340023 | 340264 | . | - | . | gene_id | "XLOC_252057"; | transcript_id | "Novel_003564"; | exon_number | "9"; | gene_type | " |
| scaffold1Cufflinks | exon | 338829 | 339173 | . | - | . | gene_id | "XLOC_252057"; | transcript_id | "Novel_003565"; | exon_number | "1"; | gene_type | " |
| scaffold1Cufflinks | exon | 339668 | 340264 | . | - | . | gene_id | "XLOC_252057"; | transcript_id | "Novel_003565"; | exon_number | "2"; | gene_type | " |
| scaffold1Cufflinks | exon | 231161 | 231531 | . | - | . | gene_id | "XLOC_252106"; | transcript_id | "Novel_003566"; | exon_number | "1"; | gene_type | " |
| scaffold1Cufflinks | exon | 231613 | 231747 | . | - | . | gene_id | "XLOC_252106"; | transcript_id | "Novel_003566"; | exon_number | "2"; | gene_type | " |
| scaffold1Cufflinks | exon | 233402 | 233544 | . | - | . | gene_id | "XLOC_252106"; | transcript_id | "Novel_003566"; | exon_number | "3"; | gene_type | " |
| scaffold1Cufflinks | exon | 234284 | 234724 | . | - | . | gene_id | "XLOC_252106"; | transcript_id | "Novel_003566"; | exon_number | "4"; | gene_type | " |
| scaffold1Cufflinks | exon | 233189 | 233544 | . | - | . | gene_id | "XLOC_252106"; | transcript_id | "Novel_003567"; | exon_number | "1"; | gene_type | " |
| scaffold1Cufflinks | exon | 234284 | 234723 | . | - | . | gene_id | "XLOC_252106"; | transcript_id | "Novel_003567"; | exon_number | "2"; | gene_type | " |
| scaffold1Cufflinks | exon | 91395  | 91860  | . | + | . | gene_id | "XLOC_252119"; | transcript_id | "Novel_003568"; | exon_number | "1"; | gene_type | " |
| scaffold1Cufflinks | exon | 91965  | 92234  | . | + | . | gene_id | "XLOC_252119"; | transcript_id | "Novel_003568"; | exon_number | "2"; | gene_type | " |
| scaffold1Cufflinks | exon | 92792  | 93798  | . | + | . | gene_id | "XLOC_252119"; | transcript_id | "Novel_003568"; | exon_number | "3"; | gene_type | " |
| scaffold1Cufflinks | exon | 332165 | 332276 | . | + | . | gene_id | "XLOC_252248"; | transcript_id | "Novel_003569"; | exon_number | "1"; | gene_type | " |

|                    |      |         |         |   |   |   |         |                              |                             |                |   |
|--------------------|------|---------|---------|---|---|---|---------|------------------------------|-----------------------------|----------------|---|
| scaffold1Cufflinks | exon | 332487  | 332540  | . | + | . | gene_id | "XLOC_252248"; transcript_id | "Novel_003569"; exon_number | "2"; gene_type | " |
| scaffold1Cufflinks | exon | 332952  | 333301  | . | + | . | gene_id | "XLOC_252248"; transcript_id | "Novel_003569"; exon_number | "3"; gene_type | " |
| scaffold1Cufflinks | exon | 333434  | 335415  | . | + | . | gene_id | "XLOC_252248"; transcript_id | "Novel_003569"; exon_number | "4"; gene_type | " |
| scaffold1Cufflinks | exon | 335838  | 336157  | . | + | . | gene_id | "XLOC_252248"; transcript_id | "Novel_003569"; exon_number | "5"; gene_type | " |
| scaffold1Cufflinks | exon | 332165  | 332276  | . | + | . | gene_id | "XLOC_252248"; transcript_id | "Novel_003570"; exon_number | "1"; gene_type | " |
| scaffold1Cufflinks | exon | 332487  | 332540  | . | + | . | gene_id | "XLOC_252248"; transcript_id | "Novel_003570"; exon_number | "2"; gene_type | " |
| scaffold1Cufflinks | exon | 332952  | 333301  | . | + | . | gene_id | "XLOC_252248"; transcript_id | "Novel_003570"; exon_number | "3"; gene_type | " |
| scaffold1Cufflinks | exon | 337488  | 339695  | . | + | . | gene_id | "XLOC_252248"; transcript_id | "Novel_003570"; exon_number | "4"; gene_type | " |
| scaffold1Cufflinks | exon | 332165  | 332276  | . | + | . | gene_id | "XLOC_252248"; transcript_id | "Novel_003571"; exon_number | "1"; gene_type | " |
| scaffold1Cufflinks | exon | 332487  | 332540  | . | + | . | gene_id | "XLOC_252248"; transcript_id | "Novel_003571"; exon_number | "2"; gene_type | " |
| scaffold1Cufflinks | exon | 332952  | 333301  | . | + | . | gene_id | "XLOC_252248"; transcript_id | "Novel_003571"; exon_number | "3"; gene_type | " |
| scaffold1Cufflinks | exon | 337488  | 339469  | . | + | . | gene_id | "XLOC_252248"; transcript_id | "Novel_003571"; exon_number | "4"; gene_type | " |
| scaffold1Cufflinks | exon | 339890  | 340432  | . | + | . | gene_id | "XLOC_252248"; transcript_id | "Novel_003571"; exon_number | "5"; gene_type | " |
| scaffold1Cufflinks | exon | 332284  | 332540  | . | + | . | gene_id | "XLOC_252248"; transcript_id | "Novel_003572"; exon_number | "1"; gene_type | " |
| scaffold1Cufflinks | exon | 332952  | 333301  | . | + | . | gene_id | "XLOC_252248"; transcript_id | "Novel_003572"; exon_number | "2"; gene_type | " |
| scaffold1Cufflinks | exon | 337488  | 339469  | . | + | . | gene_id | "XLOC_252248"; transcript_id | "Novel_003572"; exon_number | "3"; gene_type | " |
| scaffold1Cufflinks | exon | 339890  | 340046  | . | + | . | gene_id | "XLOC_252248"; transcript_id | "Novel_003572"; exon_number | "4"; gene_type | " |
| scaffold1Cufflinks | exon | 332347  | 332540  | . | + | . | gene_id | "XLOC_252248"; transcript_id | "Novel_003573"; exon_number | "1"; gene_type | " |
| scaffold1Cufflinks | exon | 332952  | 333301  | . | + | . | gene_id | "XLOC_252248"; transcript_id | "Novel_003573"; exon_number | "2"; gene_type | " |
| scaffold1Cufflinks | exon | 333434  | 335415  | . | + | . | gene_id | "XLOC_252248"; transcript_id | "Novel_003573"; exon_number | "3"; gene_type | " |
| scaffold1Cufflinks | exon | 339890  | 340028  | . | + | . | gene_id | "XLOC_252248"; transcript_id | "Novel_003573"; exon_number | "4"; gene_type | " |
| scaffold1Cufflinks | exon | 673343  | 674273  | . | - | . | gene_id | "XLOC_252521"; transcript_id | "Novel_003574"; exon_number | "1"; gene_type | " |
| scaffold1Cufflinks | exon | 674741  | 674856  | . | - | . | gene_id | "XLOC_252521"; transcript_id | "Novel_003574"; exon_number | "2"; gene_type | " |
| scaffold1Cufflinks | exon | 675470  | 675622  | . | - | . | gene_id | "XLOC_252521"; transcript_id | "Novel_003574"; exon_number | "3"; gene_type | " |
| scaffold1Cufflinks | exon | 675764  | 675803  | . | - | . | gene_id | "XLOC_252521"; transcript_id | "Novel_003574"; exon_number | "4"; gene_type | " |
| scaffold1Cufflinks | exon | 1133746 | 1134176 | . | - | . | gene_id | "XLOC_252548"; transcript_id | "Novel_003575"; exon_number | "1"; gene_type | " |
| scaffold1Cufflinks | exon | 1134690 | 1135276 | . | - | . | gene_id | "XLOC_252548"; transcript_id | "Novel_003575"; exon_number | "2"; gene_type | " |
| scaffold1Cufflinks | exon | 1135387 | 1135716 | . | - | . | gene_id | "XLOC_252548"; transcript_id | "Novel_003575"; exon_number | "3"; gene_type | " |
| scaffold1Cufflinks | exon | 1133840 | 1134176 | . | - | . | gene_id | "XLOC_252548"; transcript_id | "Novel_003576"; exon_number | "1"; gene_type | " |
| scaffold1Cufflinks | exon | 1134690 | 1134872 | . | - | . | gene_id | "XLOC_252548"; transcript_id | "Novel_003576"; exon_number | "2"; gene_type | " |
| scaffold1Cufflinks | exon | 1134967 | 1135095 | . | - | . | gene_id | "XLOC_252548"; transcript_id | "Novel_003576"; exon_number | "3"; gene_type | " |
| scaffold1Cufflinks | exon | 1135187 | 1135276 | . | - | . | gene_id | "XLOC_252548"; transcript_id | "Novel_003576"; exon_number | "4"; gene_type | " |
| scaffold1Cufflinks | exon | 1135387 | 1136112 | . | - | . | gene_id | "XLOC_252548"; transcript_id | "Novel_003576"; exon_number | "5"; gene_type | " |
| scaffold1Cufflinks | exon | 167223  | 168812  | . | + | . | gene_id | "XLOC_252759"; transcript_id | "Novel_003577"; exon_number | "1"; gene_type | " |
| scaffold1Cufflinks | exon | 168939  | 169031  | . | + | . | gene_id | "XLOC_252759"; transcript_id | "Novel_003577"; exon_number | "2"; gene_type | " |



|                    |      |         |         |   |   |   |         |                              |                             |                |   |
|--------------------|------|---------|---------|---|---|---|---------|------------------------------|-----------------------------|----------------|---|
| scaffold1Cufflinks | exon | 223677  | 223706  | . | - | . | gene_id | "XLOC_252841"; transcript_id | "Novel_003583"; exon_number | "2"; gene_type | " |
| scaffold1Cufflinks | exon | 224313  | 224357  | . | - | . | gene_id | "XLOC_252841"; transcript_id | "Novel_003583"; exon_number | "3"; gene_type | " |
| scaffold1Cufflinks | exon | 224429  | 224455  | . | - | . | gene_id | "XLOC_252841"; transcript_id | "Novel_003583"; exon_number | "4"; gene_type | " |
| scaffold1Cufflinks | exon | 224729  | 224953  | . | - | . | gene_id | "XLOC_252841"; transcript_id | "Novel_003583"; exon_number | "5"; gene_type | " |
| scaffold1Cufflinks | exon | 225054  | 225349  | . | - | . | gene_id | "XLOC_252841"; transcript_id | "Novel_003583"; exon_number | "6"; gene_type | " |
| scaffold1Cufflinks | exon | 225560  | 225825  | . | - | . | gene_id | "XLOC_252841"; transcript_id | "Novel_003583"; exon_number | "7"; gene_type | " |
| scaffold1Cufflinks | exon | 254391  | 254781  | . | - | . | gene_id | "XLOC_252858"; transcript_id | "Novel_003584"; exon_number | "1"; gene_type | " |
| scaffold1Cufflinks | exon | 257072  | 257277  | . | - | . | gene_id | "XLOC_252858"; transcript_id | "Novel_003584"; exon_number | "2"; gene_type | " |
| scaffold1Cufflinks | exon | 257378  | 257554  | . | - | . | gene_id | "XLOC_252858"; transcript_id | "Novel_003584"; exon_number | "3"; gene_type | " |
| scaffold1Cufflinks | exon | 295839  | 296219  | . | - | . | gene_id | "XLOC_252869"; transcript_id | "Novel_003585"; exon_number | "1"; gene_type | " |
| scaffold1Cufflinks | exon | 296299  | 296365  | . | - | . | gene_id | "XLOC_252869"; transcript_id | "Novel_003585"; exon_number | "2"; gene_type | " |
| scaffold1Cufflinks | exon | 298404  | 298506  | . | - | . | gene_id | "XLOC_252869"; transcript_id | "Novel_003585"; exon_number | "3"; gene_type | " |
| scaffold1Cufflinks | exon | 298605  | 298691  | . | - | . | gene_id | "XLOC_252869"; transcript_id | "Novel_003585"; exon_number | "4"; gene_type | " |
| scaffold1Cufflinks | exon | 298795  | 298949  | . | - | . | gene_id | "XLOC_252869"; transcript_id | "Novel_003585"; exon_number | "5"; gene_type | " |
| scaffold1Cufflinks | exon | 185753  | 186251  | . | + | . | gene_id | "XLOC_253169"; transcript_id | "Novel_003586"; exon_number | "1"; gene_type | " |
| scaffold1Cufflinks | exon | 186324  | 186403  | . | + | . | gene_id | "XLOC_253169"; transcript_id | "Novel_003586"; exon_number | "2"; gene_type | " |
| scaffold1Cufflinks | exon | 186497  | 186632  | . | + | . | gene_id | "XLOC_253169"; transcript_id | "Novel_003586"; exon_number | "3"; gene_type | " |
| scaffold1Cufflinks | exon | 186748  | 186897  | . | + | . | gene_id | "XLOC_253169"; transcript_id | "Novel_003586"; exon_number | "4"; gene_type | " |
| scaffold1Cufflinks | exon | 187014  | 187481  | . | + | . | gene_id | "XLOC_253169"; transcript_id | "Novel_003586"; exon_number | "5"; gene_type | " |
| scaffold1Cufflinks | exon | 844911  | 844967  | . | + | . | gene_id | "XLOC_253403"; transcript_id | "Novel_003587"; exon_number | "1"; gene_type | " |
| scaffold1Cufflinks | exon | 846499  | 847076  | . | + | . | gene_id | "XLOC_253403"; transcript_id | "Novel_003587"; exon_number | "2"; gene_type | " |
| scaffold1Cufflinks | exon | 847665  | 848238  | . | + | . | gene_id | "XLOC_253403"; transcript_id | "Novel_003587"; exon_number | "3"; gene_type | " |
| scaffold1Cufflinks | exon | 890183  | 890251  | . | + | . | gene_id | "XLOC_253412"; transcript_id | "Novel_003588"; exon_number | "1"; gene_type | " |
| scaffold1Cufflinks | exon | 891114  | 891331  | . | + | . | gene_id | "XLOC_253412"; transcript_id | "Novel_003588"; exon_number | "2"; gene_type | " |
| scaffold1Cufflinks | exon | 1091908 | 1093344 | . | + | . | gene_id | "XLOC_253441"; transcript_id | "Novel_003589"; exon_number | "1"; gene_type | " |
| scaffold1Cufflinks | exon | 1093803 | 1094404 | . | + | . | gene_id | "XLOC_253441"; transcript_id | "Novel_003589"; exon_number | "2"; gene_type | " |
| scaffold1Cufflinks | exon | 1091956 | 1093344 | . | + | . | gene_id | "XLOC_253441"; transcript_id | "Novel_003590"; exon_number | "1"; gene_type | " |
| scaffold1Cufflinks | exon | 1093803 | 1093833 | . | + | . | gene_id | "XLOC_253441"; transcript_id | "Novel_003590"; exon_number | "2"; gene_type | " |
| scaffold1Cufflinks | exon | 1093926 | 1094314 | . | + | . | gene_id | "XLOC_253441"; transcript_id | "Novel_003590"; exon_number | "3"; gene_type | " |
| scaffold1Cufflinks | exon | 1328965 | 1329167 | . | + | . | gene_id | "XLOC_253470"; transcript_id | "Novel_003591"; exon_number | "1"; gene_type | " |
| scaffold1Cufflinks | exon | 1575392 | 1575928 | . | + | . | gene_id | "XLOC_253522"; transcript_id | "Novel_003592"; exon_number | "1"; gene_type | " |
| scaffold1Cufflinks | exon | 1576002 | 1576249 | . | + | . | gene_id | "XLOC_253522"; transcript_id | "Novel_003592"; exon_number | "2"; gene_type | " |
| scaffold1Cufflinks | exon | 1576327 | 1577031 | . | + | . | gene_id | "XLOC_253522"; transcript_id | "Novel_003592"; exon_number | "3"; gene_type | " |
| scaffold1Cufflinks | exon | 1575392 | 1575928 | . | + | . | gene_id | "XLOC_253522"; transcript_id | "Novel_003593"; exon_number | "1"; gene_type | " |
| scaffold1Cufflinks | exon | 1576002 | 1576249 | . | + | . | gene_id | "XLOC_253522"; transcript_id | "Novel_003593"; exon_number | "2"; gene_type | " |

|                    |      |         |         |   |   |   |         |                              |                             |                |   |
|--------------------|------|---------|---------|---|---|---|---------|------------------------------|-----------------------------|----------------|---|
| scaffold1Cufflinks | exon | 1576327 | 1576645 | . | + | . | gene_id | "XLOC_253522"; transcript_id | "Novel_003593"; exon_number | "3"; gene_type | " |
| scaffold1Cufflinks | exon | 1576717 | 1577031 | . | + | . | gene_id | "XLOC_253522"; transcript_id | "Novel_003593"; exon_number | "4"; gene_type | " |
| scaffold1Cufflinks | exon | 854257  | 854733  | . | - | . | gene_id | "XLOC_253648"; transcript_id | "Novel_003594"; exon_number | "1"; gene_type | " |
| scaffold1Cufflinks | exon | 855460  | 856007  | . | - | . | gene_id | "XLOC_253648"; transcript_id | "Novel_003594"; exon_number | "2"; gene_type | " |
| scaffold1Cufflinks | exon | 856811  | 857173  | . | - | . | gene_id | "XLOC_253648"; transcript_id | "Novel_003594"; exon_number | "3"; gene_type | " |
| scaffold1Cufflinks | exon | 854259  | 854733  | . | - | . | gene_id | "XLOC_253648"; transcript_id | "Novel_003595"; exon_number | "1"; gene_type | " |
| scaffold1Cufflinks | exon | 855460  | 856735  | . | - | . | gene_id | "XLOC_253648"; transcript_id | "Novel_003595"; exon_number | "2"; gene_type | " |
| scaffold1Cufflinks | exon | 1342872 | 1344560 | . | - | . | gene_id | "XLOC_253731"; transcript_id | "Novel_003596"; exon_number | "1"; gene_type | " |
| scaffold1Cufflinks | exon | 1344693 | 1344836 | . | - | . | gene_id | "XLOC_253731"; transcript_id | "Novel_003596"; exon_number | "2"; gene_type | " |
| scaffold1Cufflinks | exon | 1344928 | 1346048 | . | - | . | gene_id | "XLOC_253731"; transcript_id | "Novel_003596"; exon_number | "3"; gene_type | " |
| scaffold1Cufflinks | exon | 44444   | 44733   | . | - | . | gene_id | "XLOC_253920"; transcript_id | "Novel_003597"; exon_number | "1"; gene_type | " |
| scaffold1Cufflinks | exon | 44978   | 45050   | . | - | . | gene_id | "XLOC_253920"; transcript_id | "Novel_003597"; exon_number | "2"; gene_type | " |
| scaffold1Cufflinks | exon | 45422   | 45846   | . | - | . | gene_id | "XLOC_253920"; transcript_id | "Novel_003597"; exon_number | "3"; gene_type | " |
| scaffold1Cufflinks | exon | 256950  | 258746  | . | - | . | gene_id | "XLOC_253977"; transcript_id | "Novel_003598"; exon_number | "1"; gene_type | " |
| scaffold1Cufflinks | exon | 259063  | 259835  | . | - | . | gene_id | "XLOC_253977"; transcript_id | "Novel_003598"; exon_number | "2"; gene_type | " |
| scaffold1Cufflinks | exon | 326366  | 329211  | . | + | . | gene_id | "XLOC_254057"; transcript_id | "Novel_003599"; exon_number | "1"; gene_type | " |
| scaffold1Cufflinks | exon | 330127  | 331717  | . | + | . | gene_id | "XLOC_254057"; transcript_id | "Novel_003599"; exon_number | "2"; gene_type | " |
| scaffold1Cufflinks | exon | 236122  | 237350  | . | - | . | gene_id | "XLOC_254195"; transcript_id | "Novel_003600"; exon_number | "1"; gene_type | " |
| scaffold1Cufflinks | exon | 238113  | 238147  | . | - | . | gene_id | "XLOC_254195"; transcript_id | "Novel_003600"; exon_number | "2"; gene_type | " |
| scaffold1Cufflinks | exon | 1197723 | 1198791 | . | + | . | gene_id | "XLOC_254305"; transcript_id | "Novel_003601"; exon_number | "1"; gene_type | " |
| scaffold1Cufflinks | exon | 1198869 | 1198995 | . | + | . | gene_id | "XLOC_254305"; transcript_id | "Novel_003601"; exon_number | "2"; gene_type | " |
| scaffold1Cufflinks | exon | 1074677 | 1076666 | . | - | . | gene_id | "XLOC_254568"; transcript_id | "Novel_003602"; exon_number | "1"; gene_type | " |
| scaffold1Cufflinks | exon | 1077856 | 1078370 | . | - | . | gene_id | "XLOC_254568"; transcript_id | "Novel_003602"; exon_number | "2"; gene_type | " |
| scaffold1Cufflinks | exon | 1079235 | 1079630 | . | - | . | gene_id | "XLOC_254568"; transcript_id | "Novel_003602"; exon_number | "3"; gene_type | " |
| scaffold1Cufflinks | exon | 1079716 | 1079757 | . | - | . | gene_id | "XLOC_254568"; transcript_id | "Novel_003602"; exon_number | "4"; gene_type | " |
| scaffold1Cufflinks | exon | 1079891 | 1080193 | . | - | . | gene_id | "XLOC_254568"; transcript_id | "Novel_003602"; exon_number | "5"; gene_type | " |
| scaffold1Cufflinks | exon | 1080304 | 1080493 | . | - | . | gene_id | "XLOC_254568"; transcript_id | "Novel_003602"; exon_number | "6"; gene_type | " |
| scaffold1Cufflinks | exon | 1080874 | 1080964 | . | - | . | gene_id | "XLOC_254568"; transcript_id | "Novel_003602"; exon_number | "7"; gene_type | " |
| scaffold1Cufflinks | exon | 1082569 | 1082615 | . | - | . | gene_id | "XLOC_254568"; transcript_id | "Novel_003602"; exon_number | "8"; gene_type | " |
| scaffold1Cufflinks | exon | 1083316 | 1083752 | . | - | . | gene_id | "XLOC_254568"; transcript_id | "Novel_003602"; exon_number | "9"; gene_type | " |
| scaffold1Cufflinks | exon | 1074677 | 1076666 | . | - | . | gene_id | "XLOC_254568"; transcript_id | "Novel_003603"; exon_number | "1"; gene_type | " |
| scaffold1Cufflinks | exon | 1077856 | 1078370 | . | - | . | gene_id | "XLOC_254568"; transcript_id | "Novel_003603"; exon_number | "2"; gene_type | " |
| scaffold1Cufflinks | exon | 1079235 | 1079630 | . | - | . | gene_id | "XLOC_254568"; transcript_id | "Novel_003603"; exon_number | "3"; gene_type | " |
| scaffold1Cufflinks | exon | 1079716 | 1080193 | . | - | . | gene_id | "XLOC_254568"; transcript_id | "Novel_003603"; exon_number | "4"; gene_type | " |
| scaffold1Cufflinks | exon | 1080304 | 1080449 | . | - | . | gene_id | "XLOC_254568"; transcript_id | "Novel_003603"; exon_number | "5"; gene_type | " |

|                    |      |         |         |   |   |   |                                                                                   |
|--------------------|------|---------|---------|---|---|---|-----------------------------------------------------------------------------------|
| scaffold1Cufflinks | exon | 1080874 | 1080964 | . | - | . | gene_id "XLOC_254568"; transcript_id "Novel_003603"; exon_number "6"; gene_type " |
| scaffold1Cufflinks | exon | 1082569 | 1082615 | . | - | . | gene_id "XLOC_254568"; transcript_id "Novel_003603"; exon_number "7"; gene_type " |
| scaffold1Cufflinks | exon | 1083316 | 1083752 | . | - | . | gene_id "XLOC_254568"; transcript_id "Novel_003603"; exon_number "8"; gene_type " |
| scaffold1Cufflinks | exon | 1185302 | 1186936 | . | - | . | gene_id "XLOC_254586"; transcript_id "Novel_003604"; exon_number "1"; gene_type " |
| scaffold1Cufflinks | exon | 1187288 | 1187390 | . | - | . | gene_id "XLOC_254586"; transcript_id "Novel_003604"; exon_number "2"; gene_type " |
| scaffold1Cufflinks | exon | 1310467 | 1310978 | . | - | . | gene_id "XLOC_254613"; transcript_id "Novel_003605"; exon_number "1"; gene_type " |
| scaffold1Cufflinks | exon | 1311688 | 1311763 | . | - | . | gene_id "XLOC_254613"; transcript_id "Novel_003605"; exon_number "2"; gene_type " |
| scaffold1Cufflinks | exon | 1312131 | 1312548 | . | - | . | gene_id "XLOC_254613"; transcript_id "Novel_003605"; exon_number "3"; gene_type " |
| scaffold1Cufflinks | exon | 1336419 | 1336620 | . | - | . | gene_id "XLOC_254615"; transcript_id "Novel_003606"; exon_number "1"; gene_type " |
| scaffold1Cufflinks | exon | 1336718 | 1336978 | . | - | . | gene_id "XLOC_254615"; transcript_id "Novel_003606"; exon_number "2"; gene_type " |
| scaffold1Cufflinks | exon | 158924  | 159312  | . | - | . | gene_id "XLOC_254806"; transcript_id "Novel_003607"; exon_number "1"; gene_type " |
| scaffold1Cufflinks | exon | 159417  | 159605  | . | - | . | gene_id "XLOC_254806"; transcript_id "Novel_003607"; exon_number "2"; gene_type " |
| scaffold1Cufflinks | exon | 159744  | 159861  | . | - | . | gene_id "XLOC_254806"; transcript_id "Novel_003607"; exon_number "3"; gene_type " |
| scaffold1Cufflinks | exon | 159954  | 160604  | . | - | . | gene_id "XLOC_254806"; transcript_id "Novel_003607"; exon_number "4"; gene_type " |
| scaffold1Cufflinks | exon | 160795  | 160958  | . | - | . | gene_id "XLOC_254806"; transcript_id "Novel_003607"; exon_number "5"; gene_type " |
| scaffold1Cufflinks | exon | 161058  | 161910  | . | - | . | gene_id "XLOC_254806"; transcript_id "Novel_003607"; exon_number "6"; gene_type " |
| scaffold1Cufflinks | exon | 179262  | 180186  | . | - | . | gene_id "XLOC_254977"; transcript_id "Novel_003608"; exon_number "1"; gene_type " |
| scaffold1Cufflinks | exon | 181262  | 181712  | . | - | . | gene_id "XLOC_254977"; transcript_id "Novel_003608"; exon_number "2"; gene_type " |
| scaffold1Cufflinks | exon | 70840   | 71084   | . | + | . | gene_id "XLOC_255113"; transcript_id "Novel_003609"; exon_number "1"; gene_type " |
| scaffold1Cufflinks | exon | 72192   | 72451   | . | + | . | gene_id "XLOC_255113"; transcript_id "Novel_003609"; exon_number "2"; gene_type " |
| scaffold1Cufflinks | exon | 72855   | 73183   | . | + | . | gene_id "XLOC_255113"; transcript_id "Novel_003609"; exon_number "3"; gene_type " |
| scaffold1Cufflinks | exon | 70870   | 71084   | . | + | . | gene_id "XLOC_255113"; transcript_id "Novel_003610"; exon_number "1"; gene_type " |
| scaffold1Cufflinks | exon | 72192   | 72374   | . | + | . | gene_id "XLOC_255113"; transcript_id "Novel_003610"; exon_number "2"; gene_type " |
| scaffold1Cufflinks | exon | 77555   | 77631   | . | + | . | gene_id "XLOC_255113"; transcript_id "Novel_003610"; exon_number "3"; gene_type " |
| scaffold1Cufflinks | exon | 78084   | 78719   | . | + | . | gene_id "XLOC_255113"; transcript_id "Novel_003610"; exon_number "4"; gene_type " |
| scaffold1Cufflinks | exon | 70870   | 71084   | . | + | . | gene_id "XLOC_255113"; transcript_id "Novel_003611"; exon_number "1"; gene_type " |
| scaffold1Cufflinks | exon | 72192   | 72338   | . | + | . | gene_id "XLOC_255113"; transcript_id "Novel_003611"; exon_number "2"; gene_type " |
| scaffold1Cufflinks | exon | 77519   | 77631   | . | + | . | gene_id "XLOC_255113"; transcript_id "Novel_003611"; exon_number "3"; gene_type " |
| scaffold1Cufflinks | exon | 78084   | 78719   | . | + | . | gene_id "XLOC_255113"; transcript_id "Novel_003611"; exon_number "4"; gene_type " |
| scaffold1Cufflinks | exon | 76024   | 76159   | . | + | . | gene_id "XLOC_255113"; transcript_id "Novel_003612"; exon_number "1"; gene_type " |
| scaffold1Cufflinks | exon | 77372   | 77631   | . | + | . | gene_id "XLOC_255113"; transcript_id "Novel_003612"; exon_number "2"; gene_type " |
| scaffold1Cufflinks | exon | 78084   | 78719   | . | + | . | gene_id "XLOC_255113"; transcript_id "Novel_003612"; exon_number "3"; gene_type " |
| scaffold1Cufflinks | exon | 222418  | 222487  | . | - | . | gene_id "XLOC_255173"; transcript_id "Novel_003613"; exon_number "1"; gene_type " |
| scaffold1Cufflinks | exon | 222611  | 222729  | . | - | . | gene_id "XLOC_255173"; transcript_id "Novel_003613"; exon_number "2"; gene_type " |
| scaffold1Cufflinks | exon | 222819  | 222912  | . | - | . | gene_id "XLOC_255173"; transcript_id "Novel_003613"; exon_number "3"; gene_type " |

|                    |      |        |        |   |   |         |                              |                             |                |   |
|--------------------|------|--------|--------|---|---|---------|------------------------------|-----------------------------|----------------|---|
| scaffold1Cufflinks | exon | 43778  | 44755  | . | . | gene_id | "XLOC_255510"; transcript_id | "Novel_003614"; exon_number | "1"; gene_type | " |
| scaffold1Cufflinks | exon | 44843  | 46512  | . | . | gene_id | "XLOC_255510"; transcript_id | "Novel_003614"; exon_number | "2"; gene_type | " |
| scaffold1Cufflinks | exon | 43778  | 44744  | . | . | gene_id | "XLOC_255510"; transcript_id | "Novel_003615"; exon_number | "1"; gene_type | " |
| scaffold1Cufflinks | exon | 44843  | 46512  | . | . | gene_id | "XLOC_255510"; transcript_id | "Novel_003615"; exon_number | "2"; gene_type | " |
| scaffold1Cufflinks | exon | 43778  | 45064  | . | . | gene_id | "XLOC_255510"; transcript_id | "Novel_003616"; exon_number | "1"; gene_type | " |
| scaffold1Cufflinks | exon | 46874  | 46962  | . | . | gene_id | "XLOC_255510"; transcript_id | "Novel_003616"; exon_number | "2"; gene_type | " |
| scaffold1Cufflinks | exon | 47053  | 47123  | . | . | gene_id | "XLOC_255510"; transcript_id | "Novel_003616"; exon_number | "3"; gene_type | " |
| scaffold1Cufflinks | exon | 47545  | 47624  | . | . | gene_id | "XLOC_255510"; transcript_id | "Novel_003616"; exon_number | "4"; gene_type | " |
| scaffold1Cufflinks | exon | 47715  | 47945  | . | . | gene_id | "XLOC_255510"; transcript_id | "Novel_003616"; exon_number | "5"; gene_type | " |
| scaffold1Cufflinks | exon | 43856  | 44744  | . | . | gene_id | "XLOC_255510"; transcript_id | "Novel_003617"; exon_number | "1"; gene_type | " |
| scaffold1Cufflinks | exon | 44843  | 45067  | . | . | gene_id | "XLOC_255510"; transcript_id | "Novel_003617"; exon_number | "2"; gene_type | " |
| scaffold1Cufflinks | exon | 46874  | 46962  | . | . | gene_id | "XLOC_255510"; transcript_id | "Novel_003617"; exon_number | "3"; gene_type | " |
| scaffold1Cufflinks | exon | 47053  | 47123  | . | . | gene_id | "XLOC_255510"; transcript_id | "Novel_003617"; exon_number | "4"; gene_type | " |
| scaffold1Cufflinks | exon | 47545  | 47624  | . | . | gene_id | "XLOC_255510"; transcript_id | "Novel_003617"; exon_number | "5"; gene_type | " |
| scaffold1Cufflinks | exon | 47715  | 47923  | . | . | gene_id | "XLOC_255510"; transcript_id | "Novel_003617"; exon_number | "6"; gene_type | " |
| scaffold1Cufflinks | exon | 46598  | 46962  | . | . | gene_id | "XLOC_255510"; transcript_id | "Novel_003618"; exon_number | "1"; gene_type | " |
| scaffold1Cufflinks | exon | 47053  | 47123  | . | . | gene_id | "XLOC_255510"; transcript_id | "Novel_003618"; exon_number | "2"; gene_type | " |
| scaffold1Cufflinks | exon | 47545  | 47624  | . | . | gene_id | "XLOC_255510"; transcript_id | "Novel_003618"; exon_number | "3"; gene_type | " |
| scaffold1Cufflinks | exon | 47715  | 47913  | . | . | gene_id | "XLOC_255510"; transcript_id | "Novel_003618"; exon_number | "4"; gene_type | " |
| scaffold1Cufflinks | exon | 46603  | 46962  | . | . | gene_id | "XLOC_255510"; transcript_id | "Novel_003619"; exon_number | "1"; gene_type | " |
| scaffold1Cufflinks | exon | 47053  | 47624  | . | . | gene_id | "XLOC_255510"; transcript_id | "Novel_003619"; exon_number | "2"; gene_type | " |
| scaffold1Cufflinks | exon | 47715  | 47923  | . | . | gene_id | "XLOC_255510"; transcript_id | "Novel_003619"; exon_number | "3"; gene_type | " |
| scaffold1Cufflinks | exon | 131259 | 132458 | . | . | gene_id | "XLOC_255892"; transcript_id | "Novel_003620"; exon_number | "1"; gene_type | " |
| scaffold1Cufflinks | exon | 132615 | 132707 | . | . | gene_id | "XLOC_255892"; transcript_id | "Novel_003620"; exon_number | "2"; gene_type | " |
| scaffold1Cufflinks | exon | 132890 | 132998 | . | . | gene_id | "XLOC_255892"; transcript_id | "Novel_003620"; exon_number | "3"; gene_type | " |
| scaffold1Cufflinks | exon | 82379  | 83570  | . | + | gene_id | "XLOC_256203"; transcript_id | "Novel_003621"; exon_number | "1"; gene_type | " |
| scaffold1Cufflinks | exon | 14092  | 14510  | . | . | gene_id | "XLOC_256246"; transcript_id | "Novel_003622"; exon_number | "1"; gene_type | " |
| scaffold1Cufflinks | exon | 497593 | 497853 | . | . | gene_id | "XLOC_256703"; transcript_id | "Novel_003623"; exon_number | "1"; gene_type | " |
| scaffold1Cufflinks | exon | 1666   | 2605   | . | . | gene_id | "XLOC_257048"; transcript_id | "Novel_003624"; exon_number | "1"; gene_type | " |
| scaffold1Cufflinks | exon | 2780   | 3105   | . | . | gene_id | "XLOC_257048"; transcript_id | "Novel_003624"; exon_number | "2"; gene_type | " |
| scaffold1Cufflinks | exon | 3229   | 3328   | . | . | gene_id | "XLOC_257048"; transcript_id | "Novel_003624"; exon_number | "3"; gene_type | " |
| scaffold1Cufflinks | exon | 3423   | 3990   | . | . | gene_id | "XLOC_257048"; transcript_id | "Novel_003624"; exon_number | "4"; gene_type | " |
| scaffold1Cufflinks | exon | 1686   | 2605   | . | . | gene_id | "XLOC_257048"; transcript_id | "Novel_003625"; exon_number | "1"; gene_type | " |
| scaffold1Cufflinks | exon | 2780   | 3105   | . | . | gene_id | "XLOC_257048"; transcript_id | "Novel_003625"; exon_number | "2"; gene_type | " |
| scaffold1Cufflinks | exon | 3229   | 3328   | . | . | gene_id | "XLOC_257048"; transcript_id | "Novel_003625"; exon_number | "3"; gene_type | " |

|                    |      |         |         |   |   |   |         |                              |                             |                |   |
|--------------------|------|---------|---------|---|---|---|---------|------------------------------|-----------------------------|----------------|---|
| scaffold1Cufflinks | exon | 3423    | 3453    | . | - | . | gene_id | "XLOC_257048"; transcript_id | "Novel_003625"; exon_number | "4"; gene_type | " |
| scaffold1Cufflinks | exon | 3564    | 3661    | . | - | . | gene_id | "XLOC_257048"; transcript_id | "Novel_003625"; exon_number | "5"; gene_type | " |
| scaffold1Cufflinks | exon | 3755    | 3995    | . | - | . | gene_id | "XLOC_257048"; transcript_id | "Novel_003625"; exon_number | "6"; gene_type | " |
| scaffold1Cufflinks | exon | 1704    | 2605    | . | - | . | gene_id | "XLOC_257048"; transcript_id | "Novel_003626"; exon_number | "1"; gene_type | " |
| scaffold1Cufflinks | exon | 2780    | 3105    | . | - | . | gene_id | "XLOC_257048"; transcript_id | "Novel_003626"; exon_number | "2"; gene_type | " |
| scaffold1Cufflinks | exon | 3229    | 3328    | . | - | . | gene_id | "XLOC_257048"; transcript_id | "Novel_003626"; exon_number | "3"; gene_type | " |
| scaffold1Cufflinks | exon | 3423    | 3453    | . | - | . | gene_id | "XLOC_257048"; transcript_id | "Novel_003626"; exon_number | "4"; gene_type | " |
| scaffold1Cufflinks | exon | 3564    | 4097    | . | - | . | gene_id | "XLOC_257048"; transcript_id | "Novel_003626"; exon_number | "5"; gene_type | " |
| scaffold1Cufflinks | exon | 1796    | 2605    | . | - | . | gene_id | "XLOC_257048"; transcript_id | "Novel_003627"; exon_number | "1"; gene_type | " |
| scaffold1Cufflinks | exon | 2780    | 2923    | . | - | . | gene_id | "XLOC_257048"; transcript_id | "Novel_003627"; exon_number | "2"; gene_type | " |
| scaffold1Cufflinks | exon | 3035    | 3105    | . | - | . | gene_id | "XLOC_257048"; transcript_id | "Novel_003627"; exon_number | "3"; gene_type | " |
| scaffold1Cufflinks | exon | 3229    | 3328    | . | - | . | gene_id | "XLOC_257048"; transcript_id | "Novel_003627"; exon_number | "4"; gene_type | " |
| scaffold1Cufflinks | exon | 3423    | 3453    | . | - | . | gene_id | "XLOC_257048"; transcript_id | "Novel_003627"; exon_number | "5"; gene_type | " |
| scaffold1Cufflinks | exon | 3564    | 3661    | . | - | . | gene_id | "XLOC_257048"; transcript_id | "Novel_003627"; exon_number | "6"; gene_type | " |
| scaffold1Cufflinks | exon | 3755    | 4493    | . | - | . | gene_id | "XLOC_257048"; transcript_id | "Novel_003627"; exon_number | "7"; gene_type | " |
| scaffold1Cufflinks | exon | 204929  | 206124  | . | + | . | gene_id | "XLOC_257133"; transcript_id | "Novel_003628"; exon_number | "1"; gene_type | " |
| scaffold1Cufflinks | exon | 206226  | 206365  | . | + | . | gene_id | "XLOC_257133"; transcript_id | "Novel_003628"; exon_number | "2"; gene_type | " |
| scaffold1Cufflinks | exon | 206951  | 207032  | . | + | . | gene_id | "XLOC_257133"; transcript_id | "Novel_003628"; exon_number | "3"; gene_type | " |
| scaffold1Cufflinks | exon | 207144  | 207557  | . | + | . | gene_id | "XLOC_257133"; transcript_id | "Novel_003628"; exon_number | "4"; gene_type | " |
| scaffold1Cufflinks | exon | 204934  | 205007  | . | + | . | gene_id | "XLOC_257133"; transcript_id | "Novel_003629"; exon_number | "1"; gene_type | " |
| scaffold1Cufflinks | exon | 205328  | 205396  | . | + | . | gene_id | "XLOC_257133"; transcript_id | "Novel_003629"; exon_number | "2"; gene_type | " |
| scaffold1Cufflinks | exon | 206024  | 206124  | . | + | . | gene_id | "XLOC_257133"; transcript_id | "Novel_003629"; exon_number | "3"; gene_type | " |
| scaffold1Cufflinks | exon | 206226  | 206365  | . | + | . | gene_id | "XLOC_257133"; transcript_id | "Novel_003629"; exon_number | "4"; gene_type | " |
| scaffold1Cufflinks | exon | 206951  | 207032  | . | + | . | gene_id | "XLOC_257133"; transcript_id | "Novel_003629"; exon_number | "5"; gene_type | " |
| scaffold1Cufflinks | exon | 207144  | 207965  | . | + | . | gene_id | "XLOC_257133"; transcript_id | "Novel_003629"; exon_number | "6"; gene_type | " |
| scaffold1Cufflinks | exon | 706704  | 706727  | . | + | . | gene_id | "XLOC_257215"; transcript_id | "Novel_003630"; exon_number | "1"; gene_type | " |
| scaffold1Cufflinks | exon | 709004  | 709210  | . | + | . | gene_id | "XLOC_257215"; transcript_id | "Novel_003630"; exon_number | "2"; gene_type | " |
| scaffold1Cufflinks | exon | 710142  | 710234  | . | + | . | gene_id | "XLOC_257215"; transcript_id | "Novel_003630"; exon_number | "3"; gene_type | " |
| scaffold1Cufflinks | exon | 710637  | 711728  | . | + | . | gene_id | "XLOC_257215"; transcript_id | "Novel_003630"; exon_number | "4"; gene_type | " |
| scaffold1Cufflinks | exon | 707659  | 709210  | . | + | . | gene_id | "XLOC_257215"; transcript_id | "Novel_003631"; exon_number | "1"; gene_type | " |
| scaffold1Cufflinks | exon | 710142  | 710234  | . | + | . | gene_id | "XLOC_257215"; transcript_id | "Novel_003631"; exon_number | "2"; gene_type | " |
| scaffold1Cufflinks | exon | 710637  | 711405  | . | + | . | gene_id | "XLOC_257215"; transcript_id | "Novel_003631"; exon_number | "3"; gene_type | " |
| scaffold1Cufflinks | exon | 710058  | 710234  | . | + | . | gene_id | "XLOC_257215"; transcript_id | "Novel_003632"; exon_number | "1"; gene_type | " |
| scaffold1Cufflinks | exon | 710637  | 711588  | . | + | . | gene_id | "XLOC_257215"; transcript_id | "Novel_003632"; exon_number | "2"; gene_type | " |
| scaffold1Cufflinks | exon | 1179805 | 1179910 | . | + | . | gene_id | "XLOC_257303"; transcript_id | "Novel_003633"; exon_number | "1"; gene_type | " |



|                    |      |         |         |   |   |   |                                                                                   |
|--------------------|------|---------|---------|---|---|---|-----------------------------------------------------------------------------------|
| scaffold1Cufflinks | exon | 1180003 | 1180265 | . | + | . | gene_id "XLOC_257303"; transcript_id "Novel_003633"; exon_number "2"; gene_type " |
| scaffold1Cufflinks | exon | 151769  | 153278  | . | - | . | gene_id "XLOC_257428"; transcript_id "Novel_003634"; exon_number "1"; gene_type " |
| scaffold1Cufflinks | exon | 153671  | 154231  | . | - | . | gene_id "XLOC_257428"; transcript_id "Novel_003634"; exon_number "2"; gene_type " |
| scaffold1Cufflinks | exon | 548168  | 548921  | . | - | . | gene_id "XLOC_257510"; transcript_id "Novel_003635"; exon_number "1"; gene_type " |
| scaffold1Cufflinks | exon | 161699  | 161926  | . | - | . | gene_id "XLOC_257913"; transcript_id "Novel_003636"; exon_number "1"; gene_type " |
| scaffold1Cufflinks | exon | 237079  | 238587  | . | + | . | gene_id "XLOC_257977"; transcript_id "Novel_003637"; exon_number "1"; gene_type " |
| scaffold1Cufflinks | exon | 238884  | 240317  | . | + | . | gene_id "XLOC_257977"; transcript_id "Novel_003637"; exon_number "2"; gene_type " |
| scaffold1Cufflinks | exon | 31184   | 31368   | . | - | . | gene_id "XLOC_258091"; transcript_id "Novel_003638"; exon_number "1"; gene_type " |
| scaffold1Cufflinks | exon | 31477   | 31567   | . | - | . | gene_id "XLOC_258091"; transcript_id "Novel_003638"; exon_number "2"; gene_type " |
| scaffold1Cufflinks | exon | 31673   | 31780   | . | - | . | gene_id "XLOC_258091"; transcript_id "Novel_003638"; exon_number "3"; gene_type " |
| scaffold1Cufflinks | exon | 32318   | 32483   | . | - | . | gene_id "XLOC_258091"; transcript_id "Novel_003638"; exon_number "4"; gene_type " |
| scaffold1Cufflinks | exon | 31190   | 31368   | . | - | . | gene_id "XLOC_258091"; transcript_id "Novel_003639"; exon_number "1"; gene_type " |
| scaffold1Cufflinks | exon | 31477   | 31567   | . | - | . | gene_id "XLOC_258091"; transcript_id "Novel_003639"; exon_number "2"; gene_type " |
| scaffold1Cufflinks | exon | 31673   | 31890   | . | - | . | gene_id "XLOC_258091"; transcript_id "Novel_003639"; exon_number "3"; gene_type " |
| scaffold1Cufflinks | exon | 20114   | 20362   | . | + | . | gene_id "XLOC_258148"; transcript_id "Novel_003640"; exon_number "1"; gene_type " |
| scaffold1Cufflinks | exon | 20464   | 20548   | . | + | . | gene_id "XLOC_258148"; transcript_id "Novel_003640"; exon_number "2"; gene_type " |
| scaffold1Cufflinks | exon | 20731   | 21419   | . | + | . | gene_id "XLOC_258148"; transcript_id "Novel_003640"; exon_number "3"; gene_type " |
| scaffold1Cufflinks | exon | 20147   | 20362   | . | + | . | gene_id "XLOC_258148"; transcript_id "Novel_003641"; exon_number "1"; gene_type " |
| scaffold1Cufflinks | exon | 20464   | 20548   | . | + | . | gene_id "XLOC_258148"; transcript_id "Novel_003641"; exon_number "2"; gene_type " |
| scaffold1Cufflinks | exon | 20731   | 20877   | . | + | . | gene_id "XLOC_258148"; transcript_id "Novel_003641"; exon_number "3"; gene_type " |
| scaffold1Cufflinks | exon | 21451   | 21675   | . | + | . | gene_id "XLOC_258148"; transcript_id "Novel_003641"; exon_number "4"; gene_type " |
| scaffold1Cufflinks | exon | 21794   | 21808   | . | + | . | gene_id "XLOC_258148"; transcript_id "Novel_003641"; exon_number "5"; gene_type " |
| scaffold1Cufflinks | exon | 21924   | 21976   | . | + | . | gene_id "XLOC_258148"; transcript_id "Novel_003642"; exon_number "1"; gene_type " |
| scaffold1Cufflinks | exon | 22101   | 22324   | . | + | . | gene_id "XLOC_258148"; transcript_id "Novel_003642"; exon_number "2"; gene_type " |
| scaffold1Cufflinks | exon | 22583   | 22720   | . | + | . | gene_id "XLOC_258148"; transcript_id "Novel_003642"; exon_number "3"; gene_type " |
| scaffold1Cufflinks | exon | 22877   | 24669   | . | + | . | gene_id "XLOC_258148"; transcript_id "Novel_003642"; exon_number "4"; gene_type " |
| scaffold1Cufflinks | exon | 230376  | 230562  | . | + | . | gene_id "XLOC_258163"; transcript_id "Novel_003643"; exon_number "1"; gene_type " |
| scaffold1Cufflinks | exon | 230659  | 230702  | . | + | . | gene_id "XLOC_258163"; transcript_id "Novel_003643"; exon_number "2"; gene_type " |
| scaffold1Cufflinks | exon | 230791  | 230886  | . | + | . | gene_id "XLOC_258163"; transcript_id "Novel_003643"; exon_number "3"; gene_type " |
| scaffold1Cufflinks | exon | 231208  | 231522  | . | + | . | gene_id "XLOC_258163"; transcript_id "Novel_003643"; exon_number "4"; gene_type " |
| scaffold1Cufflinks | exon | 230383  | 230702  | . | + | . | gene_id "XLOC_258163"; transcript_id "Novel_003644"; exon_number "1"; gene_type " |
| scaffold1Cufflinks | exon | 230791  | 230886  | . | + | . | gene_id "XLOC_258163"; transcript_id "Novel_003644"; exon_number "2"; gene_type " |
| scaffold1Cufflinks | exon | 231208  | 231499  | . | + | . | gene_id "XLOC_258163"; transcript_id "Novel_003644"; exon_number "3"; gene_type " |
| scaffold1Cufflinks | exon | 231542  | 231891  | . | + | . | gene_id "XLOC_258163"; transcript_id "Novel_003645"; exon_number "1"; gene_type " |
| scaffold1Cufflinks | exon | 231986  | 232163  | . | + | . | gene_id "XLOC_258163"; transcript_id "Novel_003645"; exon_number "2"; gene_type " |

|                    |      |        |        |   |   |   |         |                              |                             |                |   |
|--------------------|------|--------|--------|---|---|---|---------|------------------------------|-----------------------------|----------------|---|
| scaffold1Cufflinks | exon | 232247 | 232290 | . | + | . | gene_id | "XLOC_258163"; transcript_id | "Novel_003645"; exon_number | "3"; gene_type | " |
| scaffold1Cufflinks | exon | 232444 | 232657 | . | + | . | gene_id | "XLOC_258163"; transcript_id | "Novel_003645"; exon_number | "4"; gene_type | " |
| scaffold1Cufflinks | exon | 232885 | 233481 | . | + | . | gene_id | "XLOC_258163"; transcript_id | "Novel_003645"; exon_number | "5"; gene_type | " |
| scaffold1Cufflinks | exon | 231823 | 232163 | . | + | . | gene_id | "XLOC_258163"; transcript_id | "Novel_003646"; exon_number | "1"; gene_type | " |
| scaffold1Cufflinks | exon | 232247 | 232290 | . | + | . | gene_id | "XLOC_258163"; transcript_id | "Novel_003646"; exon_number | "2"; gene_type | " |
| scaffold1Cufflinks | exon | 232444 | 232657 | . | + | . | gene_id | "XLOC_258163"; transcript_id | "Novel_003646"; exon_number | "3"; gene_type | " |
| scaffold1Cufflinks | exon | 232885 | 233611 | . | + | . | gene_id | "XLOC_258163"; transcript_id | "Novel_003646"; exon_number | "4"; gene_type | " |
| scaffold1Cufflinks | exon | 231985 | 232163 | . | + | . | gene_id | "XLOC_258163"; transcript_id | "Novel_003647"; exon_number | "1"; gene_type | " |
| scaffold1Cufflinks | exon | 232247 | 232657 | . | + | . | gene_id | "XLOC_258163"; transcript_id | "Novel_003647"; exon_number | "2"; gene_type | " |
| scaffold1Cufflinks | exon | 232885 | 233276 | . | + | . | gene_id | "XLOC_258163"; transcript_id | "Novel_003647"; exon_number | "3"; gene_type | " |
| scaffold1Cufflinks | exon | 258867 | 258969 | . | + | . | gene_id | "XLOC_258168"; transcript_id | "Novel_003648"; exon_number | "1"; gene_type | " |
| scaffold1Cufflinks | exon | 259053 | 259159 | . | + | . | gene_id | "XLOC_258168"; transcript_id | "Novel_003648"; exon_number | "2"; gene_type | " |
| scaffold1Cufflinks | exon | 260245 | 260323 | . | + | . | gene_id | "XLOC_258168"; transcript_id | "Novel_003648"; exon_number | "3"; gene_type | " |
| scaffold1Cufflinks | exon | 260421 | 261409 | . | + | . | gene_id | "XLOC_258168"; transcript_id | "Novel_003648"; exon_number | "4"; gene_type | " |
| scaffold1Cufflinks | exon | 285755 | 286741 | . | + | . | gene_id | "XLOC_258172"; transcript_id | "Novel_003649"; exon_number | "1"; gene_type | " |
| scaffold1Cufflinks | exon | 286886 | 287477 | . | + | . | gene_id | "XLOC_258172"; transcript_id | "Novel_003649"; exon_number | "2"; gene_type | " |
| scaffold1Cufflinks | exon | 161210 | 162704 | . | - | . | gene_id | "XLOC_258221"; transcript_id | "Novel_003650"; exon_number | "1"; gene_type | " |
| scaffold1Cufflinks | exon | 162942 | 162967 | . | - | . | gene_id | "XLOC_258221"; transcript_id | "Novel_003650"; exon_number | "2"; gene_type | " |
| scaffold1Cufflinks | exon | 165291 | 167480 | . | - | . | gene_id | "XLOC_258222"; transcript_id | "Novel_003651"; exon_number | "1"; gene_type | " |
| scaffold1Cufflinks | exon | 167565 | 167708 | . | - | . | gene_id | "XLOC_258222"; transcript_id | "Novel_003651"; exon_number | "2"; gene_type | " |
| scaffold1Cufflinks | exon | 167861 | 167963 | . | - | . | gene_id | "XLOC_258222"; transcript_id | "Novel_003651"; exon_number | "3"; gene_type | " |
| scaffold1Cufflinks | exon | 168056 | 168166 | . | - | . | gene_id | "XLOC_258222"; transcript_id | "Novel_003651"; exon_number | "4"; gene_type | " |
| scaffold1Cufflinks | exon | 168265 | 169568 | . | - | . | gene_id | "XLOC_258222"; transcript_id | "Novel_003651"; exon_number | "5"; gene_type | " |
| scaffold1Cufflinks | exon | 189164 | 189884 | . | - | . | gene_id | "XLOC_258229"; transcript_id | "Novel_003652"; exon_number | "1"; gene_type | " |
| scaffold1Cufflinks | exon | 189973 | 190074 | . | - | . | gene_id | "XLOC_258229"; transcript_id | "Novel_003652"; exon_number | "2"; gene_type | " |
| scaffold1Cufflinks | exon | 190177 | 190407 | . | - | . | gene_id | "XLOC_258229"; transcript_id | "Novel_003652"; exon_number | "3"; gene_type | " |
| scaffold1Cufflinks | exon | 190501 | 190588 | . | - | . | gene_id | "XLOC_258229"; transcript_id | "Novel_003652"; exon_number | "4"; gene_type | " |
| scaffold1Cufflinks | exon | 190719 | 190807 | . | - | . | gene_id | "XLOC_258229"; transcript_id | "Novel_003652"; exon_number | "5"; gene_type | " |
| scaffold1Cufflinks | exon | 190901 | 190966 | . | - | . | gene_id | "XLOC_258229"; transcript_id | "Novel_003652"; exon_number | "6"; gene_type | " |
| scaffold1Cufflinks | exon | 191068 | 192854 | . | - | . | gene_id | "XLOC_258229"; transcript_id | "Novel_003652"; exon_number | "7"; gene_type | " |
| scaffold1Cufflinks | exon | 189164 | 189884 | . | - | . | gene_id | "XLOC_258229"; transcript_id | "Novel_003653"; exon_number | "1"; gene_type | " |
| scaffold1Cufflinks | exon | 189973 | 190074 | . | - | . | gene_id | "XLOC_258229"; transcript_id | "Novel_003653"; exon_number | "2"; gene_type | " |
| scaffold1Cufflinks | exon | 190177 | 190407 | . | - | . | gene_id | "XLOC_258229"; transcript_id | "Novel_003653"; exon_number | "3"; gene_type | " |
| scaffold1Cufflinks | exon | 190501 | 190588 | . | - | . | gene_id | "XLOC_258229"; transcript_id | "Novel_003653"; exon_number | "4"; gene_type | " |
| scaffold1Cufflinks | exon | 190719 | 190807 | . | - | . | gene_id | "XLOC_258229"; transcript_id | "Novel_003653"; exon_number | "5"; gene_type | " |

|                    |      |        |        |   |   |   |         |                              |                             |                 |   |
|--------------------|------|--------|--------|---|---|---|---------|------------------------------|-----------------------------|-----------------|---|
| scaffold1Cufflinks | exon | 190901 | 190966 | . | - | . | gene_id | "XLOC_258229"; transcript_id | "Novel_003653"; exon_number | "6"; gene_type  | " |
| scaffold1Cufflinks | exon | 191068 | 191716 | . | - | . | gene_id | "XLOC_258229"; transcript_id | "Novel_003653"; exon_number | "7"; gene_type  | " |
| scaffold1Cufflinks | exon | 192040 | 192854 | . | - | . | gene_id | "XLOC_258229"; transcript_id | "Novel_003653"; exon_number | "8"; gene_type  | " |
| scaffold1Cufflinks | exon | 241059 | 241258 | . | - | . | gene_id | "XLOC_258232"; transcript_id | "Novel_003654"; exon_number | "1"; gene_type  | " |
| scaffold1Cufflinks | exon | 241346 | 241569 | . | - | . | gene_id | "XLOC_258232"; transcript_id | "Novel_003654"; exon_number | "2"; gene_type  | " |
| scaffold1Cufflinks | exon | 301280 | 302160 | . | - | . | gene_id | "XLOC_258241"; transcript_id | "Novel_003655"; exon_number | "1"; gene_type  | " |
| scaffold1Cufflinks | exon | 302251 | 302518 | . | - | . | gene_id | "XLOC_258241"; transcript_id | "Novel_003655"; exon_number | "2"; gene_type  | " |
| scaffold1Cufflinks | exon | 309540 | 309991 | . | - | . | gene_id | "XLOC_258245"; transcript_id | "Novel_003656"; exon_number | "1"; gene_type  | " |
| scaffold1Cufflinks | exon | 310682 | 311290 | . | - | . | gene_id | "XLOC_258245"; transcript_id | "Novel_003656"; exon_number | "2"; gene_type  | " |
| scaffold1Cufflinks | exon | 322487 | 323874 | . | - | . | gene_id | "XLOC_258248"; transcript_id | "Novel_003657"; exon_number | "1"; gene_type  | " |
| scaffold1Cufflinks | exon | 323997 | 324593 | . | - | . | gene_id | "XLOC_258248"; transcript_id | "Novel_003657"; exon_number | "2"; gene_type  | " |
| scaffold1Cufflinks | exon | 323533 | 323573 | . | - | . | gene_id | "XLOC_258248"; transcript_id | "Novel_003658"; exon_number | "1"; gene_type  | " |
| scaffold1Cufflinks | exon | 323678 | 323874 | . | - | . | gene_id | "XLOC_258248"; transcript_id | "Novel_003658"; exon_number | "2"; gene_type  | " |
| scaffold1Cufflinks | exon | 323997 | 324564 | . | - | . | gene_id | "XLOC_258248"; transcript_id | "Novel_003658"; exon_number | "3"; gene_type  | " |
| scaffold1Cufflinks | exon | 235953 | 237617 | . | - | . | gene_id | "XLOC_258379"; transcript_id | "Novel_003659"; exon_number | "1"; gene_type  | " |
| scaffold1Cufflinks | exon | 299699 | 299786 | . | - | . | gene_id | "XLOC_258433"; transcript_id | "Novel_003660"; exon_number | "1"; gene_type  | " |
| scaffold1Cufflinks | exon | 304831 | 304874 | . | - | . | gene_id | "XLOC_258433"; transcript_id | "Novel_003660"; exon_number | "2"; gene_type  | " |
| scaffold1Cufflinks | exon | 305005 | 305052 | . | - | . | gene_id | "XLOC_258433"; transcript_id | "Novel_003660"; exon_number | "3"; gene_type  | " |
| scaffold1Cufflinks | exon | 305141 | 305203 | . | - | . | gene_id | "XLOC_258433"; transcript_id | "Novel_003660"; exon_number | "4"; gene_type  | " |
| scaffold1Cufflinks | exon | 305396 | 305461 | . | - | . | gene_id | "XLOC_258433"; transcript_id | "Novel_003660"; exon_number | "5"; gene_type  | " |
| scaffold1Cufflinks | exon | 310589 | 310657 | . | - | . | gene_id | "XLOC_258433"; transcript_id | "Novel_003660"; exon_number | "6"; gene_type  | " |
| scaffold1Cufflinks | exon | 311484 | 311555 | . | - | . | gene_id | "XLOC_258433"; transcript_id | "Novel_003660"; exon_number | "7"; gene_type  | " |
| scaffold1Cufflinks | exon | 311647 | 311718 | . | - | . | gene_id | "XLOC_258433"; transcript_id | "Novel_003660"; exon_number | "8"; gene_type  | " |
| scaffold1Cufflinks | exon | 311825 | 311896 | . | - | . | gene_id | "XLOC_258433"; transcript_id | "Novel_003660"; exon_number | "9"; gene_type  | " |
| scaffold1Cufflinks | exon | 311998 | 312069 | . | - | . | gene_id | "XLOC_258433"; transcript_id | "Novel_003660"; exon_number | "10"; gene_type | " |
| scaffold1Cufflinks | exon | 312155 | 312819 | . | - | . | gene_id | "XLOC_258433"; transcript_id | "Novel_003660"; exon_number | "11"; gene_type | " |
| scaffold1Cufflinks | exon | 312792 | 312843 | . | - | . | gene_id | "XLOC_258433"; transcript_id | "Novel_003661"; exon_number | "1"; gene_type  | " |
| scaffold1Cufflinks | exon | 312952 | 313023 | . | - | . | gene_id | "XLOC_258433"; transcript_id | "Novel_003661"; exon_number | "2"; gene_type  | " |
| scaffold1Cufflinks | exon | 313411 | 313582 | . | - | . | gene_id | "XLOC_258433"; transcript_id | "Novel_003661"; exon_number | "3"; gene_type  | " |
| scaffold1Cufflinks | exon | 314238 | 314419 | . | - | . | gene_id | "XLOC_258433"; transcript_id | "Novel_003661"; exon_number | "4"; gene_type  | " |
| scaffold1Cufflinks | exon | 220327 | 220556 | . | + | . | gene_id | "XLOC_258592"; transcript_id | "Novel_003662"; exon_number | "1"; gene_type  | " |
| scaffold1Cufflinks | exon | 238538 | 238805 | . | + | . | gene_id | "XLOC_258666"; transcript_id | "Novel_003663"; exon_number | "1"; gene_type  | " |
| scaffold1Cufflinks | exon | 115422 | 116121 | . | - | . | gene_id | "XLOC_258690"; transcript_id | "Novel_003664"; exon_number | "1"; gene_type  | " |
| scaffold1Cufflinks | exon | 191700 | 192550 | . | - | . | gene_id | "XLOC_258695"; transcript_id | "Novel_003665"; exon_number | "1"; gene_type  | " |
| scaffold1Cufflinks | exon | 193301 | 193341 | . | - | . | gene_id | "XLOC_258695"; transcript_id | "Novel_003665"; exon_number | "2"; gene_type  | " |

|                    |      |        |        |   |   |   |         |                |               |                 |             |      |           |   |
|--------------------|------|--------|--------|---|---|---|---------|----------------|---------------|-----------------|-------------|------|-----------|---|
| scaffold1Cufflinks | exon | 193707 | 194807 | . | - | . | gene_id | "XLOC_258695"; | transcript_id | "Novel_003665"; | exon_number | "3"; | gene_type | " |
| scaffold1Cufflinks | exon | 258054 | 258374 | . | - | . | gene_id | "XLOC_258706"; | transcript_id | "Novel_003666"; | exon_number | "1"; | gene_type | " |
| scaffold1Cufflinks | exon | 260608 | 260685 | . | - | . | gene_id | "XLOC_258706"; | transcript_id | "Novel_003666"; | exon_number | "2"; | gene_type | " |
| scaffold1Cufflinks | exon | 263473 | 263714 | . | - | . | gene_id | "XLOC_258707"; | transcript_id | "Novel_003667"; | exon_number | "1"; | gene_type | " |
| scaffold1Cufflinks | exon | 264789 | 265887 | . | - | . | gene_id | "XLOC_258707"; | transcript_id | "Novel_003667"; | exon_number | "2"; | gene_type | " |
| scaffold1Cufflinks | exon | 266107 | 266728 | . | - | . | gene_id | "XLOC_258707"; | transcript_id | "Novel_003667"; | exon_number | "3"; | gene_type | " |
| scaffold1Cufflinks | exon | 264408 | 265887 | . | - | . | gene_id | "XLOC_258707"; | transcript_id | "Novel_003668"; | exon_number | "1"; | gene_type | " |
| scaffold1Cufflinks | exon | 266107 | 266688 | . | - | . | gene_id | "XLOC_258707"; | transcript_id | "Novel_003668"; | exon_number | "2"; | gene_type | " |
| scaffold1Cufflinks | exon | 272041 | 272290 | . | - | . | gene_id | "XLOC_258711"; | transcript_id | "Novel_003669"; | exon_number | "1"; | gene_type | " |
| scaffold1Cufflinks | exon | 273052 | 273390 | . | - | . | gene_id | "XLOC_258711"; | transcript_id | "Novel_003669"; | exon_number | "2"; | gene_type | " |
| scaffold1Cufflinks | exon | 273935 | 274042 | . | - | . | gene_id | "XLOC_258711"; | transcript_id | "Novel_003670"; | exon_number | "1"; | gene_type | " |
| scaffold1Cufflinks | exon | 274130 | 274330 | . | - | . | gene_id | "XLOC_258711"; | transcript_id | "Novel_003670"; | exon_number | "2"; | gene_type | " |
| scaffold2Cufflinks | exon | 263060 | 264840 | . | + | . | gene_id | "XLOC_259187"; | transcript_id | "Novel_003671"; | exon_number | "1"; | gene_type | " |
| scaffold2Cufflinks | exon | 265448 | 266074 | . | + | . | gene_id | "XLOC_259187"; | transcript_id | "Novel_003671"; | exon_number | "2"; | gene_type | " |
| scaffold2Cufflinks | exon | 18067  | 18775  | . | - | . | gene_id | "XLOC_259313"; | transcript_id | "Novel_003672"; | exon_number | "1"; | gene_type | " |
| scaffold2Cufflinks | exon | 18866  | 19414  | . | - | . | gene_id | "XLOC_259313"; | transcript_id | "Novel_003672"; | exon_number | "2"; | gene_type | " |
| scaffold2Cufflinks | exon | 79224  | 79730  | . | + | . | gene_id | "XLOC_259415"; | transcript_id | "Novel_003673"; | exon_number | "1"; | gene_type | " |
| scaffold2Cufflinks | exon | 79869  | 79931  | . | + | . | gene_id | "XLOC_259415"; | transcript_id | "Novel_003673"; | exon_number | "2"; | gene_type | " |
| scaffold2Cufflinks | exon | 80049  | 80123  | . | + | . | gene_id | "XLOC_259415"; | transcript_id | "Novel_003673"; | exon_number | "3"; | gene_type | " |
| scaffold2Cufflinks | exon | 80236  | 80851  | . | + | . | gene_id | "XLOC_259415"; | transcript_id | "Novel_003673"; | exon_number | "4"; | gene_type | " |
| scaffold2Cufflinks | exon | 281148 | 281449 | . | + | . | gene_id | "XLOC_259452"; | transcript_id | "Novel_003674"; | exon_number | "1"; | gene_type | " |
| scaffold2Cufflinks | exon | 281539 | 281608 | . | + | . | gene_id | "XLOC_259452"; | transcript_id | "Novel_003674"; | exon_number | "2"; | gene_type | " |
| scaffold2Cufflinks | exon | 285700 | 285749 | . | + | . | gene_id | "XLOC_259452"; | transcript_id | "Novel_003674"; | exon_number | "3"; | gene_type | " |
| scaffold2Cufflinks | exon | 286606 | 286646 | . | + | . | gene_id | "XLOC_259452"; | transcript_id | "Novel_003674"; | exon_number | "4"; | gene_type | " |
| scaffold2Cufflinks | exon | 287333 | 288561 | . | + | . | gene_id | "XLOC_259452"; | transcript_id | "Novel_003674"; | exon_number | "5"; | gene_type | " |
| scaffold2Cufflinks | exon | 283361 | 283793 | . | + | . | gene_id | "XLOC_259452"; | transcript_id | "Novel_003675"; | exon_number | "1"; | gene_type | " |
| scaffold2Cufflinks | exon | 285700 | 285749 | . | + | . | gene_id | "XLOC_259452"; | transcript_id | "Novel_003675"; | exon_number | "2"; | gene_type | " |
| scaffold2Cufflinks | exon | 286606 | 286646 | . | + | . | gene_id | "XLOC_259452"; | transcript_id | "Novel_003675"; | exon_number | "3"; | gene_type | " |
| scaffold2Cufflinks | exon | 287333 | 288337 | . | + | . | gene_id | "XLOC_259452"; | transcript_id | "Novel_003675"; | exon_number | "4"; | gene_type | " |
| scaffold2Cufflinks | exon | 119190 | 119412 | . | - | . | gene_id | "XLOC_259566"; | transcript_id | "Novel_003676"; | exon_number | "1"; | gene_type | " |
| scaffold2Cufflinks | exon | 119599 | 119666 | . | - | . | gene_id | "XLOC_259566"; | transcript_id | "Novel_003676"; | exon_number | "2"; | gene_type | " |
| scaffold2Cufflinks | exon | 120174 | 120271 | . | - | . | gene_id | "XLOC_259566"; | transcript_id | "Novel_003676"; | exon_number | "3"; | gene_type | " |
| scaffold2Cufflinks | exon | 120850 | 120911 | . | - | . | gene_id | "XLOC_259566"; | transcript_id | "Novel_003676"; | exon_number | "4"; | gene_type | " |
| scaffold2Cufflinks | exon | 121021 | 121164 | . | - | . | gene_id | "XLOC_259566"; | transcript_id | "Novel_003676"; | exon_number | "5"; | gene_type | " |
| scaffold2Cufflinks | exon | 121393 | 121757 | . | - | . | gene_id | "XLOC_259566"; | transcript_id | "Novel_003676"; | exon_number | "6"; | gene_type | " |

|                    |      |        |        |   |   |   |         |                |               |                 |             |       |           |   |
|--------------------|------|--------|--------|---|---|---|---------|----------------|---------------|-----------------|-------------|-------|-----------|---|
| scaffold2Cufflinks | exon | 290639 | 291248 | . | - | . | gene_id | "XLOC_259576"; | transcript_id | "Novel_003677"; | exon_number | "1";  | gene_type | " |
| scaffold2Cufflinks | exon | 291627 | 291716 | . | - | . | gene_id | "XLOC_259576"; | transcript_id | "Novel_003677"; | exon_number | "2";  | gene_type | " |
| scaffold2Cufflinks | exon | 291840 | 292168 | . | - | . | gene_id | "XLOC_259576"; | transcript_id | "Novel_003677"; | exon_number | "3";  | gene_type | " |
| scaffold2Cufflinks | exon | 292340 | 292499 | . | - | . | gene_id | "XLOC_259576"; | transcript_id | "Novel_003677"; | exon_number | "4";  | gene_type | " |
| scaffold2Cufflinks | exon | 292788 | 292970 | . | - | . | gene_id | "XLOC_259576"; | transcript_id | "Novel_003677"; | exon_number | "5";  | gene_type | " |
| scaffold2Cufflinks | exon | 293061 | 293383 | . | - | . | gene_id | "XLOC_259576"; | transcript_id | "Novel_003677"; | exon_number | "6";  | gene_type | " |
| scaffold2Cufflinks | exon | 293526 | 294095 | . | - | . | gene_id | "XLOC_259576"; | transcript_id | "Novel_003677"; | exon_number | "7";  | gene_type | " |
| scaffold2Cufflinks | exon | 294224 | 294247 | . | - | . | gene_id | "XLOC_259576"; | transcript_id | "Novel_003677"; | exon_number | "8";  | gene_type | " |
| scaffold2Cufflinks | exon | 290667 | 291248 | . | - | . | gene_id | "XLOC_259576"; | transcript_id | "Novel_003678"; | exon_number | "1";  | gene_type | " |
| scaffold2Cufflinks | exon | 291627 | 291716 | . | - | . | gene_id | "XLOC_259576"; | transcript_id | "Novel_003678"; | exon_number | "2";  | gene_type | " |
| scaffold2Cufflinks | exon | 291840 | 292168 | . | - | . | gene_id | "XLOC_259576"; | transcript_id | "Novel_003678"; | exon_number | "3";  | gene_type | " |
| scaffold2Cufflinks | exon | 292340 | 292499 | . | - | . | gene_id | "XLOC_259576"; | transcript_id | "Novel_003678"; | exon_number | "4";  | gene_type | " |
| scaffold2Cufflinks | exon | 292788 | 292970 | . | - | . | gene_id | "XLOC_259576"; | transcript_id | "Novel_003678"; | exon_number | "5";  | gene_type | " |
| scaffold2Cufflinks | exon | 293061 | 293166 | . | - | . | gene_id | "XLOC_259576"; | transcript_id | "Novel_003678"; | exon_number | "6";  | gene_type | " |
| scaffold2Cufflinks | exon | 293252 | 293383 | . | - | . | gene_id | "XLOC_259576"; | transcript_id | "Novel_003678"; | exon_number | "7";  | gene_type | " |
| scaffold2Cufflinks | exon | 293526 | 294134 | . | - | . | gene_id | "XLOC_259576"; | transcript_id | "Novel_003678"; | exon_number | "8";  | gene_type | " |
| scaffold2Cufflinks | exon | 220296 | 220520 | . | + | . | gene_id | "XLOC_259637"; | transcript_id | "Novel_003679"; | exon_number | "1";  | gene_type | " |
| scaffold2Cufflinks | exon | 222666 | 223895 | . | + | . | gene_id | "XLOC_259637"; | transcript_id | "Novel_003679"; | exon_number | "2";  | gene_type | " |
| scaffold2Cufflinks | exon | 48871  | 49345  | . | + | . | gene_id | "XLOC_259770"; | transcript_id | "Novel_003680"; | exon_number | "1";  | gene_type | " |
| scaffold2Cufflinks | exon | 49430  | 49724  | . | + | . | gene_id | "XLOC_259770"; | transcript_id | "Novel_003680"; | exon_number | "2";  | gene_type | " |
| scaffold2Cufflinks | exon | 50036  | 50445  | . | + | . | gene_id | "XLOC_259770"; | transcript_id | "Novel_003680"; | exon_number | "3";  | gene_type | " |
| scaffold2Cufflinks | exon | 50573  | 50621  | . | + | . | gene_id | "XLOC_259770"; | transcript_id | "Novel_003680"; | exon_number | "4";  | gene_type | " |
| scaffold2Cufflinks | exon | 50720  | 50791  | . | + | . | gene_id | "XLOC_259770"; | transcript_id | "Novel_003680"; | exon_number | "5";  | gene_type | " |
| scaffold2Cufflinks | exon | 51080  | 51209  | . | + | . | gene_id | "XLOC_259770"; | transcript_id | "Novel_003680"; | exon_number | "6";  | gene_type | " |
| scaffold2Cufflinks | exon | 51791  | 51911  | . | + | . | gene_id | "XLOC_259770"; | transcript_id | "Novel_003680"; | exon_number | "7";  | gene_type | " |
| scaffold2Cufflinks | exon | 51992  | 52241  | . | + | . | gene_id | "XLOC_259770"; | transcript_id | "Novel_003680"; | exon_number | "8";  | gene_type | " |
| scaffold2Cufflinks | exon | 52332  | 52436  | . | + | . | gene_id | "XLOC_259770"; | transcript_id | "Novel_003680"; | exon_number | "9";  | gene_type | " |
| scaffold2Cufflinks | exon | 52539  | 52583  | . | + | . | gene_id | "XLOC_259770"; | transcript_id | "Novel_003680"; | exon_number | "10"; | gene_type | " |
| scaffold2Cufflinks | exon | 52674  | 52826  | . | + | . | gene_id | "XLOC_259770"; | transcript_id | "Novel_003680"; | exon_number | "11"; | gene_type | " |
| scaffold2Cufflinks | exon | 52937  | 53215  | . | + | . | gene_id | "XLOC_259770"; | transcript_id | "Novel_003680"; | exon_number | "12"; | gene_type | " |
| scaffold2Cufflinks | exon | 53571  | 53707  | . | + | . | gene_id | "XLOC_259770"; | transcript_id | "Novel_003680"; | exon_number | "13"; | gene_type | " |
| scaffold2Cufflinks | exon | 53839  | 54270  | . | + | . | gene_id | "XLOC_259770"; | transcript_id | "Novel_003680"; | exon_number | "14"; | gene_type | " |
| scaffold2Cufflinks | exon | 206939 | 209006 | . | + | . | gene_id | "XLOC_259799"; | transcript_id | "Novel_003681"; | exon_number | "1";  | gene_type | " |
| scaffold2Cufflinks | exon | 209201 | 209504 | . | + | . | gene_id | "XLOC_259799"; | transcript_id | "Novel_003681"; | exon_number | "2";  | gene_type | " |
| scaffold2Cufflinks | exon | 206939 | 208879 | . | + | . | gene_id | "XLOC_259799"; | transcript_id | "Novel_003682"; | exon_number | "1";  | gene_type | " |

|                    |      |        |        |   |   |   |         |                              |                             |                |   |
|--------------------|------|--------|--------|---|---|---|---------|------------------------------|-----------------------------|----------------|---|
| scaffold2Cufflinks | exon | 208963 | 209006 | . | + | . | gene_id | "XLOC_259799"; transcript_id | "Novel_003682"; exon_number | "2"; gene_type | " |
| scaffold2Cufflinks | exon | 209201 | 209504 | . | + | . | gene_id | "XLOC_259799"; transcript_id | "Novel_003682"; exon_number | "3"; gene_type | " |
| scaffold2Cufflinks | exon | 27738  | 28138  | . | + | . | gene_id | "XLOC_260020"; transcript_id | "Novel_003683"; exon_number | "1"; gene_type | " |
| scaffold2Cufflinks | exon | 28687  | 29782  | . | + | . | gene_id | "XLOC_260020"; transcript_id | "Novel_003683"; exon_number | "2"; gene_type | " |
| scaffold2Cufflinks | exon | 27738  | 28138  | . | + | . | gene_id | "XLOC_260020"; transcript_id | "Novel_003684"; exon_number | "1"; gene_type | " |
| scaffold2Cufflinks | exon | 29668  | 29782  | . | + | . | gene_id | "XLOC_260020"; transcript_id | "Novel_003684"; exon_number | "2"; gene_type | " |
| scaffold2Cufflinks | exon | 29856  | 30170  | . | + | . | gene_id | "XLOC_260021"; transcript_id | "Novel_003685"; exon_number | "1"; gene_type | " |
| scaffold2Cufflinks | exon | 30283  | 30319  | . | + | . | gene_id | "XLOC_260021"; transcript_id | "Novel_003685"; exon_number | "2"; gene_type | " |
| scaffold2Cufflinks | exon | 30711  | 30768  | . | + | . | gene_id | "XLOC_260021"; transcript_id | "Novel_003685"; exon_number | "3"; gene_type | " |
| scaffold2Cufflinks | exon | 30874  | 31664  | . | + | . | gene_id | "XLOC_260021"; transcript_id | "Novel_003685"; exon_number | "4"; gene_type | " |
| scaffold2Cufflinks | exon | 29875  | 30170  | . | + | . | gene_id | "XLOC_260021"; transcript_id | "Novel_003686"; exon_number | "1"; gene_type | " |
| scaffold2Cufflinks | exon | 30283  | 30319  | . | + | . | gene_id | "XLOC_260021"; transcript_id | "Novel_003686"; exon_number | "2"; gene_type | " |
| scaffold2Cufflinks | exon | 30711  | 30768  | . | + | . | gene_id | "XLOC_260021"; transcript_id | "Novel_003686"; exon_number | "3"; gene_type | " |
| scaffold2Cufflinks | exon | 30877  | 31168  | . | + | . | gene_id | "XLOC_260021"; transcript_id | "Novel_003686"; exon_number | "4"; gene_type | " |
| scaffold2Cufflinks | exon | 161958 | 162630 | . | + | . | gene_id | "XLOC_260036"; transcript_id | "Novel_003687"; exon_number | "1"; gene_type | " |
| scaffold2Cufflinks | exon | 163172 | 164536 | . | + | . | gene_id | "XLOC_260036"; transcript_id | "Novel_003687"; exon_number | "2"; gene_type | " |
| scaffold2Cufflinks | exon | 164623 | 165027 | . | + | . | gene_id | "XLOC_260036"; transcript_id | "Novel_003687"; exon_number | "3"; gene_type | " |
| scaffold2Cufflinks | exon | 161958 | 163402 | . | + | . | gene_id | "XLOC_260036"; transcript_id | "Novel_003688"; exon_number | "1"; gene_type | " |
| scaffold2Cufflinks | exon | 164185 | 164727 | . | + | . | gene_id | "XLOC_260036"; transcript_id | "Novel_003688"; exon_number | "2"; gene_type | " |
| scaffold2Cufflinks | exon | 164821 | 165027 | . | + | . | gene_id | "XLOC_260036"; transcript_id | "Novel_003688"; exon_number | "3"; gene_type | " |
| scaffold2Cufflinks | exon | 161961 | 162630 | . | + | . | gene_id | "XLOC_260036"; transcript_id | "Novel_003689"; exon_number | "1"; gene_type | " |
| scaffold2Cufflinks | exon | 163172 | 163402 | . | + | . | gene_id | "XLOC_260036"; transcript_id | "Novel_003689"; exon_number | "2"; gene_type | " |
| scaffold2Cufflinks | exon | 164185 | 164536 | . | + | . | gene_id | "XLOC_260036"; transcript_id | "Novel_003689"; exon_number | "3"; gene_type | " |
| scaffold2Cufflinks | exon | 164623 | 165926 | . | + | . | gene_id | "XLOC_260036"; transcript_id | "Novel_003689"; exon_number | "4"; gene_type | " |
| scaffold2Cufflinks | exon | 162685 | 164727 | . | + | . | gene_id | "XLOC_260036"; transcript_id | "Novel_003690"; exon_number | "1"; gene_type | " |
| scaffold2Cufflinks | exon | 164821 | 165926 | . | + | . | gene_id | "XLOC_260036"; transcript_id | "Novel_003690"; exon_number | "2"; gene_type | " |
| scaffold2Cufflinks | exon | 184990 | 185788 | . | + | . | gene_id | "XLOC_260043"; transcript_id | "Novel_003691"; exon_number | "1"; gene_type | " |
| scaffold2Cufflinks | exon | 19944  | 20373  | . | - | . | gene_id | "XLOC_260062"; transcript_id | "Novel_003692"; exon_number | "1"; gene_type | " |
| scaffold2Cufflinks | exon | 20841  | 21277  | . | - | . | gene_id | "XLOC_260062"; transcript_id | "Novel_003692"; exon_number | "2"; gene_type | " |
| scaffold2Cufflinks | exon | 21558  | 21836  | . | - | . | gene_id | "XLOC_260062"; transcript_id | "Novel_003692"; exon_number | "3"; gene_type | " |
| scaffold2Cufflinks | exon | 22081  | 22645  | . | - | . | gene_id | "XLOC_260062"; transcript_id | "Novel_003692"; exon_number | "4"; gene_type | " |
| scaffold2Cufflinks | exon | 20766  | 21277  | . | - | . | gene_id | "XLOC_260062"; transcript_id | "Novel_003693"; exon_number | "1"; gene_type | " |
| scaffold2Cufflinks | exon | 21558  | 21836  | . | - | . | gene_id | "XLOC_260062"; transcript_id | "Novel_003693"; exon_number | "2"; gene_type | " |
| scaffold2Cufflinks | exon | 22081  | 22145  | . | - | . | gene_id | "XLOC_260062"; transcript_id | "Novel_003693"; exon_number | "3"; gene_type | " |
| scaffold2Cufflinks | exon | 21316  | 21836  | . | - | . | gene_id | "XLOC_260062"; transcript_id | "Novel_003694"; exon_number | "1"; gene_type | " |

|                    |      |        |        |   |   |   |         |                |               |                 |             |       |           |   |
|--------------------|------|--------|--------|---|---|---|---------|----------------|---------------|-----------------|-------------|-------|-----------|---|
| scaffold2Cufflinks | exon | 22081  | 22357  | . | - | . | gene_id | "XLOC_260062"; | transcript_id | "Novel_003694"; | exon_number | "2";  | gene_type | " |
| scaffold2Cufflinks | exon | 22797  | 23104  | . | - | . | gene_id | "XLOC_260062"; | transcript_id | "Novel_003694"; | exon_number | "3";  | gene_type | " |
| scaffold2Cufflinks | exon | 23459  | 23701  | . | - | . | gene_id | "XLOC_260062"; | transcript_id | "Novel_003694"; | exon_number | "4";  | gene_type | " |
| scaffold2Cufflinks | exon | 31194  | 31618  | . | - | . | gene_id | "XLOC_260063"; | transcript_id | "Novel_003695"; | exon_number | "1";  | gene_type | " |
| scaffold2Cufflinks | exon | 31939  | 32217  | . | - | . | gene_id | "XLOC_260063"; | transcript_id | "Novel_003695"; | exon_number | "2";  | gene_type | " |
| scaffold2Cufflinks | exon | 32318  | 32593  | . | - | . | gene_id | "XLOC_260063"; | transcript_id | "Novel_003695"; | exon_number | "3";  | gene_type | " |
| scaffold2Cufflinks | exon | 32720  | 32938  | . | - | . | gene_id | "XLOC_260063"; | transcript_id | "Novel_003695"; | exon_number | "4";  | gene_type | " |
| scaffold2Cufflinks | exon | 33018  | 33186  | . | - | . | gene_id | "XLOC_260063"; | transcript_id | "Novel_003695"; | exon_number | "5";  | gene_type | " |
| scaffold2Cufflinks | exon | 33367  | 33541  | . | - | . | gene_id | "XLOC_260063"; | transcript_id | "Novel_003695"; | exon_number | "6";  | gene_type | " |
| scaffold2Cufflinks | exon | 33670  | 33781  | . | - | . | gene_id | "XLOC_260063"; | transcript_id | "Novel_003695"; | exon_number | "7";  | gene_type | " |
| scaffold2Cufflinks | exon | 34793  | 35281  | . | - | . | gene_id | "XLOC_260063"; | transcript_id | "Novel_003695"; | exon_number | "8";  | gene_type | " |
| scaffold2Cufflinks | exon | 32585  | 32938  | . | - | . | gene_id | "XLOC_260063"; | transcript_id | "Novel_003696"; | exon_number | "1";  | gene_type | " |
| scaffold2Cufflinks | exon | 33018  | 33186  | . | - | . | gene_id | "XLOC_260063"; | transcript_id | "Novel_003696"; | exon_number | "2";  | gene_type | " |
| scaffold2Cufflinks | exon | 33367  | 33541  | . | - | . | gene_id | "XLOC_260063"; | transcript_id | "Novel_003696"; | exon_number | "3";  | gene_type | " |
| scaffold2Cufflinks | exon | 33670  | 33743  | . | - | . | gene_id | "XLOC_260063"; | transcript_id | "Novel_003696"; | exon_number | "4";  | gene_type | " |
| scaffold2Cufflinks | exon | 201768 | 202340 | . | - | . | gene_id | "XLOC_260082"; | transcript_id | "Novel_003697"; | exon_number | "1";  | gene_type | " |
| scaffold2Cufflinks | exon | 202981 | 203551 | . | - | . | gene_id | "XLOC_260082"; | transcript_id | "Novel_003697"; | exon_number | "2";  | gene_type | " |
| scaffold2Cufflinks | exon | 1      | 250    | . | + | . | gene_id | "XLOC_260166"; | transcript_id | "Novel_003698"; | exon_number | "1";  | gene_type | " |
| scaffold2Cufflinks | exon | 349    | 422    | . | + | . | gene_id | "XLOC_260166"; | transcript_id | "Novel_003698"; | exon_number | "2";  | gene_type | " |
| scaffold2Cufflinks | exon | 514    | 583    | . | + | . | gene_id | "XLOC_260166"; | transcript_id | "Novel_003698"; | exon_number | "3";  | gene_type | " |
| scaffold2Cufflinks | exon | 660    | 715    | . | + | . | gene_id | "XLOC_260166"; | transcript_id | "Novel_003698"; | exon_number | "4";  | gene_type | " |
| scaffold2Cufflinks | exon | 1521   | 1562   | . | + | . | gene_id | "XLOC_260166"; | transcript_id | "Novel_003698"; | exon_number | "5";  | gene_type | " |
| scaffold2Cufflinks | exon | 119    | 250    | . | + | . | gene_id | "XLOC_260166"; | transcript_id | "Novel_003699"; | exon_number | "1";  | gene_type | " |
| scaffold2Cufflinks | exon | 349    | 422    | . | + | . | gene_id | "XLOC_260166"; | transcript_id | "Novel_003699"; | exon_number | "2";  | gene_type | " |
| scaffold2Cufflinks | exon | 514    | 583    | . | + | . | gene_id | "XLOC_260166"; | transcript_id | "Novel_003699"; | exon_number | "3";  | gene_type | " |
| scaffold2Cufflinks | exon | 660    | 1592   | . | + | . | gene_id | "XLOC_260166"; | transcript_id | "Novel_003699"; | exon_number | "4";  | gene_type | " |
| scaffold2Cufflinks | exon | 1752   | 1846   | . | + | . | gene_id | "XLOC_260166"; | transcript_id | "Novel_003699"; | exon_number | "5";  | gene_type | " |
| scaffold2Cufflinks | exon | 1938   | 2004   | . | + | . | gene_id | "XLOC_260166"; | transcript_id | "Novel_003699"; | exon_number | "6";  | gene_type | " |
| scaffold2Cufflinks | exon | 2094   | 2223   | . | + | . | gene_id | "XLOC_260166"; | transcript_id | "Novel_003699"; | exon_number | "7";  | gene_type | " |
| scaffold2Cufflinks | exon | 2327   | 2545   | . | + | . | gene_id | "XLOC_260166"; | transcript_id | "Novel_003699"; | exon_number | "8";  | gene_type | " |
| scaffold2Cufflinks | exon | 2678   | 2817   | . | + | . | gene_id | "XLOC_260166"; | transcript_id | "Novel_003699"; | exon_number | "9";  | gene_type | " |
| scaffold2Cufflinks | exon | 2919   | 3093   | . | + | . | gene_id | "XLOC_260166"; | transcript_id | "Novel_003699"; | exon_number | "10"; | gene_type | " |
| scaffold2Cufflinks | exon | 3182   | 3272   | . | + | . | gene_id | "XLOC_260166"; | transcript_id | "Novel_003699"; | exon_number | "11"; | gene_type | " |
| scaffold2Cufflinks | exon | 3731   | 3888   | . | + | . | gene_id | "XLOC_260166"; | transcript_id | "Novel_003699"; | exon_number | "12"; | gene_type | " |
| scaffold2Cufflinks | exon | 3969   | 4157   | . | + | . | gene_id | "XLOC_260166"; | transcript_id | "Novel_003699"; | exon_number | "13"; | gene_type | " |

|                         |        |        |   |   |   |                                                                                   |
|-------------------------|--------|--------|---|---|---|-----------------------------------------------------------------------------------|
| scaffold2Cufflinks exon | 5306   | 5646   | . | + | . | gene_id "XLOC_260166"; transcript_id "Novel_003699"; exon_number "14"; gene_type  |
| scaffold2Cufflinks exon | 1617   | 1846   | . | + | . | gene_id "XLOC_260166"; transcript_id "Novel_003700"; exon_number "1"; gene_type " |
| scaffold2Cufflinks exon | 1938   | 2004   | . | + | . | gene_id "XLOC_260166"; transcript_id "Novel_003700"; exon_number "2"; gene_type " |
| scaffold2Cufflinks exon | 2094   | 2223   | . | + | . | gene_id "XLOC_260166"; transcript_id "Novel_003700"; exon_number "3"; gene_type " |
| scaffold2Cufflinks exon | 2327   | 2545   | . | + | . | gene_id "XLOC_260166"; transcript_id "Novel_003700"; exon_number "4"; gene_type " |
| scaffold2Cufflinks exon | 2678   | 2817   | . | + | . | gene_id "XLOC_260166"; transcript_id "Novel_003700"; exon_number "5"; gene_type " |
| scaffold2Cufflinks exon | 2919   | 3093   | . | + | . | gene_id "XLOC_260166"; transcript_id "Novel_003700"; exon_number "6"; gene_type " |
| scaffold2Cufflinks exon | 3182   | 3272   | . | + | . | gene_id "XLOC_260166"; transcript_id "Novel_003700"; exon_number "7"; gene_type " |
| scaffold2Cufflinks exon | 3731   | 3888   | . | + | . | gene_id "XLOC_260166"; transcript_id "Novel_003700"; exon_number "8"; gene_type " |
| scaffold2Cufflinks exon | 3969   | 4157   | . | + | . | gene_id "XLOC_260166"; transcript_id "Novel_003700"; exon_number "9"; gene_type " |
| scaffold2Cufflinks exon | 5306   | 5641   | . | + | . | gene_id "XLOC_260166"; transcript_id "Novel_003700"; exon_number "10"; gene_type  |
| scaffold2Cufflinks exon | 184437 | 184674 | . | + | . | gene_id "XLOC_260414"; transcript_id "Novel_003701"; exon_number "1"; gene_type " |
| scaffold2Cufflinks exon | 184777 | 184951 | . | + | . | gene_id "XLOC_260414"; transcript_id "Novel_003701"; exon_number "2"; gene_type " |
| scaffold2Cufflinks exon | 185065 | 185155 | . | + | . | gene_id "XLOC_260414"; transcript_id "Novel_003701"; exon_number "3"; gene_type " |
| scaffold2Cufflinks exon | 185248 | 185367 | . | + | . | gene_id "XLOC_260414"; transcript_id "Novel_003701"; exon_number "4"; gene_type " |
| scaffold2Cufflinks exon | 185456 | 185513 | . | + | . | gene_id "XLOC_260414"; transcript_id "Novel_003701"; exon_number "5"; gene_type " |
| scaffold2Cufflinks exon | 187361 | 187930 | . | + | . | gene_id "XLOC_260414"; transcript_id "Novel_003701"; exon_number "6"; gene_type " |
| scaffold2Cufflinks exon | 191777 | 192313 | . | + | . | gene_id "XLOC_260418"; transcript_id "Novel_003702"; exon_number "1"; gene_type " |
| scaffold2Cufflinks exon | 193488 | 193762 | . | + | . | gene_id "XLOC_260418"; transcript_id "Novel_003702"; exon_number "2"; gene_type " |
| scaffold2Cufflinks exon | 194370 | 194788 | . | + | . | gene_id "XLOC_260418"; transcript_id "Novel_003702"; exon_number "3"; gene_type " |
| scaffold2Cufflinks exon | 258478 | 258722 | . | + | . | gene_id "XLOC_260426"; transcript_id "Novel_003703"; exon_number "1"; gene_type " |
| scaffold2Cufflinks exon | 258830 | 258962 | . | + | . | gene_id "XLOC_260426"; transcript_id "Novel_003703"; exon_number "2"; gene_type " |
| scaffold2Cufflinks exon | 260197 | 260268 | . | + | . | gene_id "XLOC_260426"; transcript_id "Novel_003703"; exon_number "3"; gene_type " |
| scaffold2Cufflinks exon | 260364 | 260507 | . | + | . | gene_id "XLOC_260426"; transcript_id "Novel_003703"; exon_number "4"; gene_type " |
| scaffold2Cufflinks exon | 260972 | 261043 | . | + | . | gene_id "XLOC_260426"; transcript_id "Novel_003703"; exon_number "5"; gene_type " |
| scaffold2Cufflinks exon | 261476 | 261547 | . | + | . | gene_id "XLOC_260426"; transcript_id "Novel_003703"; exon_number "6"; gene_type " |
| scaffold2Cufflinks exon | 261852 | 262089 | . | + | . | gene_id "XLOC_260426"; transcript_id "Novel_003703"; exon_number "7"; gene_type " |
| scaffold2Cufflinks exon | 258486 | 258722 | . | + | . | gene_id "XLOC_260426"; transcript_id "Novel_003704"; exon_number "1"; gene_type " |
| scaffold2Cufflinks exon | 258830 | 259233 | . | + | . | gene_id "XLOC_260426"; transcript_id "Novel_003704"; exon_number "2"; gene_type " |
| scaffold2Cufflinks exon | 260349 | 260507 | . | + | . | gene_id "XLOC_260426"; transcript_id "Novel_003705"; exon_number "1"; gene_type " |
| scaffold2Cufflinks exon | 260972 | 261043 | . | + | . | gene_id "XLOC_260426"; transcript_id "Novel_003705"; exon_number "2"; gene_type " |
| scaffold2Cufflinks exon | 261476 | 261547 | . | + | . | gene_id "XLOC_260426"; transcript_id "Novel_003705"; exon_number "3"; gene_type " |
| scaffold2Cufflinks exon | 261852 | 262005 | . | + | . | gene_id "XLOC_260426"; transcript_id "Novel_003705"; exon_number "4"; gene_type " |
| scaffold2Cufflinks exon | 288529 | 288729 | . | + | . | gene_id "XLOC_260430"; transcript_id "Novel_003706"; exon_number "1"; gene_type " |
| scaffold2Cufflinks exon | 289390 | 289426 | . | + | . | gene_id "XLOC_260430"; transcript_id "Novel_003706"; exon_number "2"; gene_type " |



|                    |      |        |        |   |   |   |         |                              |                             |                |   |
|--------------------|------|--------|--------|---|---|---|---------|------------------------------|-----------------------------|----------------|---|
| scaffold2Cufflinks | exon | 289514 | 289724 | . | + | . | gene_id | "XLOC_260430"; transcript_id | "Novel_003706"; exon_number | "3"; gene_type | " |
| scaffold2Cufflinks | exon | 290282 | 290443 | . | + | . | gene_id | "XLOC_260430"; transcript_id | "Novel_003706"; exon_number | "4"; gene_type | " |
| scaffold2Cufflinks | exon | 290543 | 290662 | . | + | . | gene_id | "XLOC_260430"; transcript_id | "Novel_003706"; exon_number | "5"; gene_type | " |
| scaffold2Cufflinks | exon | 291480 | 291818 | . | + | . | gene_id | "XLOC_260430"; transcript_id | "Novel_003706"; exon_number | "6"; gene_type | " |
| scaffold2Cufflinks | exon | 37820  | 38178  | . | - | . | gene_id | "XLOC_260435"; transcript_id | "Novel_003707"; exon_number | "1"; gene_type | " |
| scaffold2Cufflinks | exon | 38465  | 38584  | . | - | . | gene_id | "XLOC_260435"; transcript_id | "Novel_003707"; exon_number | "2"; gene_type | " |
| scaffold2Cufflinks | exon | 38701  | 38763  | . | - | . | gene_id | "XLOC_260435"; transcript_id | "Novel_003707"; exon_number | "3"; gene_type | " |
| scaffold2Cufflinks | exon | 38849  | 39193  | . | - | . | gene_id | "XLOC_260435"; transcript_id | "Novel_003707"; exon_number | "4"; gene_type | " |
| scaffold2Cufflinks | exon | 39328  | 40308  | . | - | . | gene_id | "XLOC_260435"; transcript_id | "Novel_003707"; exon_number | "5"; gene_type | " |
| scaffold2Cufflinks | exon | 37963  | 38178  | . | - | . | gene_id | "XLOC_260435"; transcript_id | "Novel_003708"; exon_number | "1"; gene_type | " |
| scaffold2Cufflinks | exon | 38465  | 38584  | . | - | . | gene_id | "XLOC_260435"; transcript_id | "Novel_003708"; exon_number | "2"; gene_type | " |
| scaffold2Cufflinks | exon | 38701  | 38763  | . | - | . | gene_id | "XLOC_260435"; transcript_id | "Novel_003708"; exon_number | "3"; gene_type | " |
| scaffold2Cufflinks | exon | 38849  | 39193  | . | - | . | gene_id | "XLOC_260435"; transcript_id | "Novel_003708"; exon_number | "4"; gene_type | " |
| scaffold2Cufflinks | exon | 39328  | 39468  | . | - | . | gene_id | "XLOC_260435"; transcript_id | "Novel_003708"; exon_number | "5"; gene_type | " |
| scaffold2Cufflinks | exon | 39625  | 40349  | . | - | . | gene_id | "XLOC_260435"; transcript_id | "Novel_003708"; exon_number | "6"; gene_type | " |
| scaffold2Cufflinks | exon | 38354  | 38584  | . | - | . | gene_id | "XLOC_260435"; transcript_id | "Novel_003709"; exon_number | "1"; gene_type | " |
| scaffold2Cufflinks | exon | 38701  | 38763  | . | - | . | gene_id | "XLOC_260435"; transcript_id | "Novel_003709"; exon_number | "2"; gene_type | " |
| scaffold2Cufflinks | exon | 38849  | 39193  | . | - | . | gene_id | "XLOC_260435"; transcript_id | "Novel_003709"; exon_number | "3"; gene_type | " |
| scaffold2Cufflinks | exon | 39328  | 39468  | . | - | . | gene_id | "XLOC_260435"; transcript_id | "Novel_003709"; exon_number | "4"; gene_type | " |
| scaffold2Cufflinks | exon | 39625  | 40280  | . | - | . | gene_id | "XLOC_260435"; transcript_id | "Novel_003709"; exon_number | "5"; gene_type | " |
| scaffold2Cufflinks | exon | 123849 | 124186 | . | - | . | gene_id | "XLOC_260454"; transcript_id | "Novel_003710"; exon_number | "1"; gene_type | " |
| scaffold2Cufflinks | exon | 124302 | 124372 | . | - | . | gene_id | "XLOC_260454"; transcript_id | "Novel_003710"; exon_number | "2"; gene_type | " |
| scaffold2Cufflinks | exon | 124969 | 125332 | . | - | . | gene_id | "XLOC_260454"; transcript_id | "Novel_003710"; exon_number | "3"; gene_type | " |
| scaffold2Cufflinks | exon | 126168 | 126511 | . | - | . | gene_id | "XLOC_260454"; transcript_id | "Novel_003710"; exon_number | "4"; gene_type | " |
| scaffold2Cufflinks | exon | 23     | 1235   | . | + | . | gene_id | "XLOC_260474"; transcript_id | "Novel_003711"; exon_number | "1"; gene_type | " |
| scaffold2Cufflinks | exon | 1325   | 1394   | . | + | . | gene_id | "XLOC_260474"; transcript_id | "Novel_003711"; exon_number | "2"; gene_type | " |
| scaffold2Cufflinks | exon | 2669   | 2811   | . | + | . | gene_id | "XLOC_260474"; transcript_id | "Novel_003711"; exon_number | "3"; gene_type | " |
| scaffold2Cufflinks | exon | 2906   | 3023   | . | + | . | gene_id | "XLOC_260474"; transcript_id | "Novel_003711"; exon_number | "4"; gene_type | " |
| scaffold2Cufflinks | exon | 3932   | 4124   | . | + | . | gene_id | "XLOC_260474"; transcript_id | "Novel_003711"; exon_number | "5"; gene_type | " |
| scaffold2Cufflinks | exon | 4206   | 4760   | . | + | . | gene_id | "XLOC_260474"; transcript_id | "Novel_003711"; exon_number | "6"; gene_type | " |
| scaffold2Cufflinks | exon | 32     | 1235   | . | + | . | gene_id | "XLOC_260474"; transcript_id | "Novel_003712"; exon_number | "1"; gene_type | " |
| scaffold2Cufflinks | exon | 1325   | 1394   | . | + | . | gene_id | "XLOC_260474"; transcript_id | "Novel_003712"; exon_number | "2"; gene_type | " |
| scaffold2Cufflinks | exon | 2906   | 3023   | . | + | . | gene_id | "XLOC_260474"; transcript_id | "Novel_003712"; exon_number | "3"; gene_type | " |
| scaffold2Cufflinks | exon | 3932   | 4124   | . | + | . | gene_id | "XLOC_260474"; transcript_id | "Novel_003712"; exon_number | "4"; gene_type | " |
| scaffold2Cufflinks | exon | 4206   | 4748   | . | + | . | gene_id | "XLOC_260474"; transcript_id | "Novel_003712"; exon_number | "5"; gene_type | " |

|                    |      |        |        |   |   |   |         |                              |                             |                 |   |
|--------------------|------|--------|--------|---|---|---|---------|------------------------------|-----------------------------|-----------------|---|
| scaffold2Cufflinks | exon | 140782 | 141080 | . | + | . | gene_id | "XLOC_260488"; transcript_id | "Novel_003713"; exon_number | "1"; gene_type  | " |
| scaffold2Cufflinks | exon | 141159 | 141239 | . | + | . | gene_id | "XLOC_260488"; transcript_id | "Novel_003713"; exon_number | "2"; gene_type  | " |
| scaffold2Cufflinks | exon | 141322 | 141584 | . | + | . | gene_id | "XLOC_260488"; transcript_id | "Novel_003713"; exon_number | "3"; gene_type  | " |
| scaffold2Cufflinks | exon | 229295 | 229451 | . | + | . | gene_id | "XLOC_260513"; transcript_id | "Novel_003714"; exon_number | "1"; gene_type  | " |
| scaffold2Cufflinks | exon | 230253 | 230320 | . | + | . | gene_id | "XLOC_260513"; transcript_id | "Novel_003714"; exon_number | "2"; gene_type  | " |
| scaffold2Cufflinks | exon | 230820 | 230881 | . | + | . | gene_id | "XLOC_260513"; transcript_id | "Novel_003714"; exon_number | "3"; gene_type  | " |
| scaffold2Cufflinks | exon | 231013 | 231166 | . | + | . | gene_id | "XLOC_260513"; transcript_id | "Novel_003714"; exon_number | "4"; gene_type  | " |
| scaffold2Cufflinks | exon | 231591 | 231655 | . | + | . | gene_id | "XLOC_260513"; transcript_id | "Novel_003714"; exon_number | "5"; gene_type  | " |
| scaffold2Cufflinks | exon | 231807 | 232160 | . | + | . | gene_id | "XLOC_260513"; transcript_id | "Novel_003714"; exon_number | "6"; gene_type  | " |
| scaffold2Cufflinks | exon | 232725 | 233222 | . | + | . | gene_id | "XLOC_260513"; transcript_id | "Novel_003714"; exon_number | "7"; gene_type  | " |
| scaffold2Cufflinks | exon | 233559 | 233771 | . | + | . | gene_id | "XLOC_260513"; transcript_id | "Novel_003714"; exon_number | "8"; gene_type  | " |
| scaffold2Cufflinks | exon | 234143 | 234307 | . | + | . | gene_id | "XLOC_260513"; transcript_id | "Novel_003714"; exon_number | "9"; gene_type  | " |
| scaffold2Cufflinks | exon | 234512 | 234617 | . | + | . | gene_id | "XLOC_260513"; transcript_id | "Novel_003714"; exon_number | "10"; gene_type | " |
| scaffold2Cufflinks | exon | 229299 | 229451 | . | + | . | gene_id | "XLOC_260513"; transcript_id | "Novel_003715"; exon_number | "1"; gene_type  | " |
| scaffold2Cufflinks | exon | 230253 | 230320 | . | + | . | gene_id | "XLOC_260513"; transcript_id | "Novel_003715"; exon_number | "2"; gene_type  | " |
| scaffold2Cufflinks | exon | 230820 | 230881 | . | + | . | gene_id | "XLOC_260513"; transcript_id | "Novel_003715"; exon_number | "3"; gene_type  | " |
| scaffold2Cufflinks | exon | 231013 | 231166 | . | + | . | gene_id | "XLOC_260513"; transcript_id | "Novel_003715"; exon_number | "4"; gene_type  | " |
| scaffold2Cufflinks | exon | 231591 | 231655 | . | + | . | gene_id | "XLOC_260513"; transcript_id | "Novel_003715"; exon_number | "5"; gene_type  | " |
| scaffold2Cufflinks | exon | 231807 | 232160 | . | + | . | gene_id | "XLOC_260513"; transcript_id | "Novel_003715"; exon_number | "6"; gene_type  | " |
| scaffold2Cufflinks | exon | 232725 | 233222 | . | + | . | gene_id | "XLOC_260513"; transcript_id | "Novel_003715"; exon_number | "7"; gene_type  | " |
| scaffold2Cufflinks | exon | 233559 | 233771 | . | + | . | gene_id | "XLOC_260513"; transcript_id | "Novel_003715"; exon_number | "8"; gene_type  | " |
| scaffold2Cufflinks | exon | 234143 | 234307 | . | + | . | gene_id | "XLOC_260513"; transcript_id | "Novel_003715"; exon_number | "9"; gene_type  | " |
| scaffold2Cufflinks | exon | 234509 | 234624 | . | + | . | gene_id | "XLOC_260513"; transcript_id | "Novel_003715"; exon_number | "10"; gene_type | " |
| scaffold2Cufflinks | exon | 244903 | 245317 | . | - | . | gene_id | "XLOC_260567"; transcript_id | "Novel_003716"; exon_number | "1"; gene_type  | " |
| scaffold2Cufflinks | exon | 246269 | 246585 | . | - | . | gene_id | "XLOC_260567"; transcript_id | "Novel_003716"; exon_number | "2"; gene_type  | " |
| scaffold2Cufflinks | exon | 247423 | 247659 | . | - | . | gene_id | "XLOC_260567"; transcript_id | "Novel_003716"; exon_number | "3"; gene_type  | " |
| scaffold2Cufflinks | exon | 148129 | 148556 | . | - | . | gene_id | "XLOC_260856"; transcript_id | "Novel_003717"; exon_number | "1"; gene_type  | " |
| scaffold2Cufflinks | exon | 149092 | 149429 | . | - | . | gene_id | "XLOC_260856"; transcript_id | "Novel_003717"; exon_number | "2"; gene_type  | " |
| scaffold2Cufflinks | exon | 6336   | 7133   | . | - | . | gene_id | "XLOC_260905"; transcript_id | "Novel_003718"; exon_number | "1"; gene_type  | " |
| scaffold2Cufflinks | exon | 7483   | 7599   | . | - | . | gene_id | "XLOC_260905"; transcript_id | "Novel_003718"; exon_number | "2"; gene_type  | " |
| scaffold2Cufflinks | exon | 29212  | 29495  | . | + | . | gene_id | "XLOC_261009"; transcript_id | "Novel_003719"; exon_number | "1"; gene_type  | " |
| scaffold2Cufflinks | exon | 78495  | 78865  | . | + | . | gene_id | "XLOC_261013"; transcript_id | "Novel_003720"; exon_number | "1"; gene_type  | " |
| scaffold2Cufflinks | exon | 80172  | 81271  | . | + | . | gene_id | "XLOC_261013"; transcript_id | "Novel_003720"; exon_number | "2"; gene_type  | " |
| scaffold2Cufflinks | exon | 161749 | 162508 | . | - | . | gene_id | "XLOC_261074"; transcript_id | "Novel_003721"; exon_number | "1"; gene_type  | " |
| scaffold2Cufflinks | exon | 163240 | 163787 | . | - | . | gene_id | "XLOC_261074"; transcript_id | "Novel_003721"; exon_number | "2"; gene_type  | " |

|                    |      |        |        |   |   |   |         |                |               |                 |             |      |           |   |
|--------------------|------|--------|--------|---|---|---|---------|----------------|---------------|-----------------|-------------|------|-----------|---|
| scaffold2Cufflinks | exon | 164568 | 164660 | . | - | . | gene_id | "XLOC_261074"; | transcript_id | "Novel_003721"; | exon_number | "3"; | gene_type | " |
| scaffold2Cufflinks | exon | 161749 | 162508 | . | - | . | gene_id | "XLOC_261074"; | transcript_id | "Novel_003722"; | exon_number | "1"; | gene_type | " |
| scaffold2Cufflinks | exon | 163240 | 163787 | . | - | . | gene_id | "XLOC_261074"; | transcript_id | "Novel_003722"; | exon_number | "2"; | gene_type | " |
| scaffold2Cufflinks | exon | 164580 | 164666 | . | - | . | gene_id | "XLOC_261074"; | transcript_id | "Novel_003722"; | exon_number | "3"; | gene_type | " |
| scaffold2Cufflinks | exon | 88352  | 88709  | . | - | . | gene_id | "XLOC_261172"; | transcript_id | "Novel_003723"; | exon_number | "1"; | gene_type | " |
| scaffold2Cufflinks | exon | 88935  | 97193  | . | - | . | gene_id | "XLOC_261172"; | transcript_id | "Novel_003723"; | exon_number | "2"; | gene_type | " |
| scaffold2Cufflinks | exon | 97534  | 97619  | . | - | . | gene_id | "XLOC_261172"; | transcript_id | "Novel_003723"; | exon_number | "3"; | gene_type | " |
| scaffold2Cufflinks | exon | 89091  | 97201  | . | - | . | gene_id | "XLOC_261172"; | transcript_id | "Novel_003724"; | exon_number | "1"; | gene_type | " |
| scaffold2Cufflinks | exon | 97534  | 97600  | . | - | . | gene_id | "XLOC_261172"; | transcript_id | "Novel_003724"; | exon_number | "2"; | gene_type | " |
| scaffold2Cufflinks | exon | 159374 | 159392 | . | + | . | gene_id | "XLOC_261552"; | transcript_id | "Novel_003725"; | exon_number | "1"; | gene_type | " |
| scaffold2Cufflinks | exon | 159485 | 159546 | . | + | . | gene_id | "XLOC_261552"; | transcript_id | "Novel_003725"; | exon_number | "2"; | gene_type | " |
| scaffold2Cufflinks | exon | 159745 | 160432 | . | + | . | gene_id | "XLOC_261552"; | transcript_id | "Novel_003725"; | exon_number | "3"; | gene_type | " |
| scaffold2Cufflinks | exon | 82037  | 82678  | . | - | . | gene_id | "XLOC_261575"; | transcript_id | "Novel_003726"; | exon_number | "1"; | gene_type | " |
| scaffold2Cufflinks | exon | 82866  | 83154  | . | - | . | gene_id | "XLOC_261575"; | transcript_id | "Novel_003726"; | exon_number | "2"; | gene_type | " |
| scaffold2Cufflinks | exon | 132567 | 134766 | . | - | . | gene_id | "XLOC_261583"; | transcript_id | "Novel_003727"; | exon_number | "1"; | gene_type | " |
| scaffold2Cufflinks | exon | 136310 | 136522 | . | - | . | gene_id | "XLOC_261583"; | transcript_id | "Novel_003727"; | exon_number | "2"; | gene_type | " |
| scaffold2Cufflinks | exon | 167935 | 168202 | . | - | . | gene_id | "XLOC_261588"; | transcript_id | "Novel_003728"; | exon_number | "1"; | gene_type | " |
| scaffold2Cufflinks | exon | 168283 | 168444 | . | - | . | gene_id | "XLOC_261588"; | transcript_id | "Novel_003728"; | exon_number | "2"; | gene_type | " |
| scaffold2Cufflinks | exon | 168536 | 168625 | . | - | . | gene_id | "XLOC_261588"; | transcript_id | "Novel_003728"; | exon_number | "3"; | gene_type | " |
| scaffold2Cufflinks | exon | 168794 | 168955 | . | - | . | gene_id | "XLOC_261588"; | transcript_id | "Novel_003728"; | exon_number | "4"; | gene_type | " |
| scaffold2Cufflinks | exon | 169050 | 169151 | . | - | . | gene_id | "XLOC_261588"; | transcript_id | "Novel_003728"; | exon_number | "5"; | gene_type | " |
| scaffold2Cufflinks | exon | 169234 | 169428 | . | - | . | gene_id | "XLOC_261588"; | transcript_id | "Novel_003728"; | exon_number | "6"; | gene_type | " |
| scaffold2Cufflinks | exon | 259511 | 259997 | . | - | . | gene_id | "XLOC_261611"; | transcript_id | "Novel_003729"; | exon_number | "1"; | gene_type | " |
| scaffold2Cufflinks | exon | 260090 | 260244 | . | - | . | gene_id | "XLOC_261611"; | transcript_id | "Novel_003729"; | exon_number | "2"; | gene_type | " |
| scaffold2Cufflinks | exon | 260329 | 260361 | . | - | . | gene_id | "XLOC_261611"; | transcript_id | "Novel_003729"; | exon_number | "3"; | gene_type | " |
| scaffold2Cufflinks | exon | 27284  | 28372  | . | - | . | gene_id | "XLOC_261690"; | transcript_id | "Novel_003730"; | exon_number | "1"; | gene_type | " |
| scaffold2Cufflinks | exon | 28460  | 28713  | . | - | . | gene_id | "XLOC_261690"; | transcript_id | "Novel_003730"; | exon_number | "2"; | gene_type | " |
| scaffold2Cufflinks | exon | 30397  | 30600  | . | - | . | gene_id | "XLOC_261690"; | transcript_id | "Novel_003730"; | exon_number | "3"; | gene_type | " |
| scaffold2Cufflinks | exon | 28082  | 28713  | . | - | . | gene_id | "XLOC_261690"; | transcript_id | "Novel_003731"; | exon_number | "1"; | gene_type | " |
| scaffold2Cufflinks | exon | 30397  | 30600  | . | - | . | gene_id | "XLOC_261690"; | transcript_id | "Novel_003731"; | exon_number | "2"; | gene_type | " |
| scaffold2Cufflinks | exon | 47951  | 48652  | . | - | . | gene_id | "XLOC_262001"; | transcript_id | "Novel_003732"; | exon_number | "1"; | gene_type | " |
| scaffold2Cufflinks | exon | 49061  | 49133  | . | - | . | gene_id | "XLOC_262001"; | transcript_id | "Novel_003732"; | exon_number | "2"; | gene_type | " |
| scaffold2Cufflinks | exon | 49224  | 49349  | . | - | . | gene_id | "XLOC_262001"; | transcript_id | "Novel_003732"; | exon_number | "3"; | gene_type | " |
| scaffold2Cufflinks | exon | 49881  | 50042  | . | - | . | gene_id | "XLOC_262001"; | transcript_id | "Novel_003732"; | exon_number | "4"; | gene_type | " |
| scaffold2Cufflinks | exon | 27459  | 28270  | . | + | . | gene_id | "XLOC_262006"; | transcript_id | "Novel_003733"; | exon_number | "1"; | gene_type | " |

|                    |      |         |         |   |   |   |         |                              |                             |                |   |
|--------------------|------|---------|---------|---|---|---|---------|------------------------------|-----------------------------|----------------|---|
| scaffold2Cufflinks | exon | 29257   | 30397   | . | + | . | gene_id | "XLOC_262006"; transcript_id | "Novel_003733"; exon_number | "2"; gene_type | " |
| scaffold2Cufflinks | exon | 76921   | 77089   | . | + | . | gene_id | "XLOC_262013"; transcript_id | "Novel_003734"; exon_number | "1"; gene_type | " |
| scaffold2Cufflinks | exon | 78118   | 78385   | . | + | . | gene_id | "XLOC_262013"; transcript_id | "Novel_003734"; exon_number | "2"; gene_type | " |
| scaffold2Cufflinks | exon | 78461   | 78836   | . | + | . | gene_id | "XLOC_262013"; transcript_id | "Novel_003734"; exon_number | "3"; gene_type | " |
| scaffold2Cufflinks | exon | 80046   | 80184   | . | + | . | gene_id | "XLOC_262013"; transcript_id | "Novel_003734"; exon_number | "4"; gene_type | " |
| scaffold2Cufflinks | exon | 80286   | 80534   | . | + | . | gene_id | "XLOC_262013"; transcript_id | "Novel_003734"; exon_number | "5"; gene_type | " |
| scaffold2Cufflinks | exon | 80615   | 81021   | . | + | . | gene_id | "XLOC_262013"; transcript_id | "Novel_003734"; exon_number | "6"; gene_type | " |
| scaffold2Cufflinks | exon | 1345920 | 1346231 | . | - | . | gene_id | "XLOC_262542"; transcript_id | "Novel_003735"; exon_number | "1"; gene_type | " |
| scaffold2Cufflinks | exon | 1346725 | 1347731 | . | - | . | gene_id | "XLOC_262542"; transcript_id | "Novel_003735"; exon_number | "2"; gene_type | " |
| scaffold2Cufflinks | exon | 840667  | 841120  | . | - | . | gene_id | "XLOC_262985"; transcript_id | "Novel_003736"; exon_number | "1"; gene_type | " |
| scaffold2Cufflinks | exon | 841237  | 841392  | . | - | . | gene_id | "XLOC_262985"; transcript_id | "Novel_003736"; exon_number | "2"; gene_type | " |
| scaffold2Cufflinks | exon | 843043  | 843114  | . | - | . | gene_id | "XLOC_262985"; transcript_id | "Novel_003736"; exon_number | "3"; gene_type | " |
| scaffold2Cufflinks | exon | 843215  | 843255  | . | - | . | gene_id | "XLOC_262985"; transcript_id | "Novel_003736"; exon_number | "4"; gene_type | " |
| scaffold2Cufflinks | exon | 87829   | 89155   | . | + | . | gene_id | "XLOC_263456"; transcript_id | "Novel_003737"; exon_number | "1"; gene_type | " |
| scaffold2Cufflinks | exon | 89244   | 90290   | . | + | . | gene_id | "XLOC_263456"; transcript_id | "Novel_003737"; exon_number | "2"; gene_type | " |
| scaffold2Cufflinks | exon | 238737  | 239224  | . | + | . | gene_id | "XLOC_263470"; transcript_id | "Novel_003738"; exon_number | "1"; gene_type | " |
| scaffold2Cufflinks | exon | 327369  | 327675  | . | + | . | gene_id | "XLOC_263587"; transcript_id | "Novel_003739"; exon_number | "1"; gene_type | " |
| scaffold2Cufflinks | exon | 328198  | 330186  | . | + | . | gene_id | "XLOC_263587"; transcript_id | "Novel_003739"; exon_number | "2"; gene_type | " |
| scaffold2Cufflinks | exon | 330275  | 330340  | . | + | . | gene_id | "XLOC_263587"; transcript_id | "Novel_003739"; exon_number | "3"; gene_type | " |
| scaffold2Cufflinks | exon | 330426  | 330901  | . | + | . | gene_id | "XLOC_263587"; transcript_id | "Novel_003739"; exon_number | "4"; gene_type | " |
| scaffold2Cufflinks | exon | 327369  | 327675  | . | + | . | gene_id | "XLOC_263587"; transcript_id | "Novel_003740"; exon_number | "1"; gene_type | " |
| scaffold2Cufflinks | exon | 328198  | 330186  | . | + | . | gene_id | "XLOC_263587"; transcript_id | "Novel_003740"; exon_number | "2"; gene_type | " |
| scaffold2Cufflinks | exon | 330275  | 330340  | . | + | . | gene_id | "XLOC_263587"; transcript_id | "Novel_003740"; exon_number | "3"; gene_type | " |
| scaffold2Cufflinks | exon | 330437  | 330901  | . | + | . | gene_id | "XLOC_263587"; transcript_id | "Novel_003740"; exon_number | "4"; gene_type | " |
| scaffold2Cufflinks | exon | 328164  | 330186  | . | + | . | gene_id | "XLOC_263587"; transcript_id | "Novel_003741"; exon_number | "1"; gene_type | " |
| scaffold2Cufflinks | exon | 330275  | 330340  | . | + | . | gene_id | "XLOC_263587"; transcript_id | "Novel_003741"; exon_number | "2"; gene_type | " |
| scaffold2Cufflinks | exon | 330426  | 330677  | . | + | . | gene_id | "XLOC_263587"; transcript_id | "Novel_003741"; exon_number | "3"; gene_type | " |
| scaffold2Cufflinks | exon | 1117389 | 1117747 | . | + | . | gene_id | "XLOC_263758"; transcript_id | "Novel_003742"; exon_number | "1"; gene_type | " |
| scaffold2Cufflinks | exon | 1118246 | 1118401 | . | + | . | gene_id | "XLOC_263758"; transcript_id | "Novel_003742"; exon_number | "2"; gene_type | " |
| scaffold2Cufflinks | exon | 1343849 | 1344132 | . | + | . | gene_id | "XLOC_263826"; transcript_id | "Novel_003743"; exon_number | "1"; gene_type | " |
| scaffold2Cufflinks | exon | 1344447 | 1344487 | . | + | . | gene_id | "XLOC_263826"; transcript_id | "Novel_003743"; exon_number | "2"; gene_type | " |
| scaffold2Cufflinks | exon | 1345872 | 1346005 | . | + | . | gene_id | "XLOC_263826"; transcript_id | "Novel_003743"; exon_number | "3"; gene_type | " |
| scaffold2Cufflinks | exon | 1346122 | 1348206 | . | + | . | gene_id | "XLOC_263826"; transcript_id | "Novel_003743"; exon_number | "4"; gene_type | " |
| scaffold2Cufflinks | exon | 1343849 | 1344132 | . | + | . | gene_id | "XLOC_263826"; transcript_id | "Novel_003744"; exon_number | "1"; gene_type | " |
| scaffold2Cufflinks | exon | 1345872 | 1348206 | . | + | . | gene_id | "XLOC_263826"; transcript_id | "Novel_003744"; exon_number | "2"; gene_type | " |

|                    |      |         |         |   |   |   |         |                |               |                 |             |      |           |   |
|--------------------|------|---------|---------|---|---|---|---------|----------------|---------------|-----------------|-------------|------|-----------|---|
| scaffold2Cufflinks | exon | 1343860 | 1344132 | . | + | . | gene_id | "XLOC_263826"; | transcript_id | "Novel_003745"; | exon_number | "1"; | gene_type | " |
| scaffold2Cufflinks | exon | 1345872 | 1346005 | . | + | . | gene_id | "XLOC_263826"; | transcript_id | "Novel_003745"; | exon_number | "2"; | gene_type | " |
| scaffold2Cufflinks | exon | 1346122 | 1348420 | . | + | . | gene_id | "XLOC_263826"; | transcript_id | "Novel_003745"; | exon_number | "3"; | gene_type | " |
| scaffold2Cufflinks | exon | 1423610 | 1423846 | . | - | . | gene_id | "XLOC_264092"; | transcript_id | "Novel_003746"; | exon_number | "1"; | gene_type | " |
| scaffold2Cufflinks | exon | 1424543 | 1424630 | . | - | . | gene_id | "XLOC_264092"; | transcript_id | "Novel_003746"; | exon_number | "2"; | gene_type | " |
| scaffold2Cufflinks | exon | 1424735 | 1424797 | . | - | . | gene_id | "XLOC_264092"; | transcript_id | "Novel_003746"; | exon_number | "3"; | gene_type | " |
| scaffold2Cufflinks | exon | 1424879 | 1425090 | . | - | . | gene_id | "XLOC_264092"; | transcript_id | "Novel_003746"; | exon_number | "4"; | gene_type | " |
| scaffold2Cufflinks | exon | 131661  | 131930  | . | + | . | gene_id | "XLOC_264127"; | transcript_id | "Novel_003747"; | exon_number | "1"; | gene_type | " |
| scaffold2Cufflinks | exon | 132015  | 132646  | . | + | . | gene_id | "XLOC_264127"; | transcript_id | "Novel_003747"; | exon_number | "2"; | gene_type | " |
| scaffold2Cufflinks | exon | 63120   | 63363   | . | + | . | gene_id | "XLOC_264233"; | transcript_id | "Novel_003748"; | exon_number | "1"; | gene_type | " |
| scaffold2Cufflinks | exon | 65131   | 65417   | . | + | . | gene_id | "XLOC_264233"; | transcript_id | "Novel_003748"; | exon_number | "2"; | gene_type | " |
| scaffold2Cufflinks | exon | 101124  | 101390  | . | + | . | gene_id | "XLOC_264243"; | transcript_id | "Novel_003749"; | exon_number | "1"; | gene_type | " |
| scaffold2Cufflinks | exon | 101506  | 101768  | . | + | . | gene_id | "XLOC_264243"; | transcript_id | "Novel_003749"; | exon_number | "2"; | gene_type | " |
| scaffold2Cufflinks | exon | 101905  | 101925  | . | + | . | gene_id | "XLOC_264243"; | transcript_id | "Novel_003749"; | exon_number | "3"; | gene_type | " |
| scaffold2Cufflinks | exon | 101126  | 101390  | . | + | . | gene_id | "XLOC_264243"; | transcript_id | "Novel_003750"; | exon_number | "1"; | gene_type | " |
| scaffold2Cufflinks | exon | 101506  | 101594  | . | + | . | gene_id | "XLOC_264243"; | transcript_id | "Novel_003750"; | exon_number | "2"; | gene_type | " |
| scaffold2Cufflinks | exon | 101670  | 101768  | . | + | . | gene_id | "XLOC_264243"; | transcript_id | "Novel_003750"; | exon_number | "3"; | gene_type | " |
| scaffold2Cufflinks | exon | 101905  | 103002  | . | + | . | gene_id | "XLOC_264243"; | transcript_id | "Novel_003750"; | exon_number | "4"; | gene_type | " |
| scaffold2Cufflinks | exon | 213363  | 214423  | . | - | . | gene_id | "XLOC_264310"; | transcript_id | "Novel_003751"; | exon_number | "1"; | gene_type | " |
| scaffold2Cufflinks | exon | 214903  | 215683  | . | - | . | gene_id | "XLOC_264310"; | transcript_id | "Novel_003751"; | exon_number | "2"; | gene_type | " |
| scaffold2Cufflinks | exon | 846330  | 848064  | . | + | . | gene_id | "XLOC_264605"; | transcript_id | "Novel_003752"; | exon_number | "1"; | gene_type | " |
| scaffold2Cufflinks | exon | 186323  | 187095  | . | - | . | gene_id | "XLOC_264736"; | transcript_id | "Novel_003753"; | exon_number | "1"; | gene_type | " |
| scaffold2Cufflinks | exon | 187313  | 187541  | . | - | . | gene_id | "XLOC_264736"; | transcript_id | "Novel_003753"; | exon_number | "2"; | gene_type | " |
| scaffold2Cufflinks | exon | 985271  | 985363  | . | - | . | gene_id | "XLOC_264866"; | transcript_id | "Novel_003754"; | exon_number | "1"; | gene_type | " |
| scaffold2Cufflinks | exon | 985469  | 985822  | . | - | . | gene_id | "XLOC_264866"; | transcript_id | "Novel_003754"; | exon_number | "2"; | gene_type | " |
| scaffold2Cufflinks | exon | 1299898 | 1300340 | . | - | . | gene_id | "XLOC_264921"; | transcript_id | "Novel_003755"; | exon_number | "1"; | gene_type | " |
| scaffold2Cufflinks | exon | 113712  | 113812  | . | + | . | gene_id | "XLOC_265230"; | transcript_id | "Novel_003756"; | exon_number | "1"; | gene_type | " |
| scaffold2Cufflinks | exon | 115364  | 115500  | . | + | . | gene_id | "XLOC_265230"; | transcript_id | "Novel_003756"; | exon_number | "2"; | gene_type | " |
| scaffold2Cufflinks | exon | 115882  | 116033  | . | + | . | gene_id | "XLOC_265230"; | transcript_id | "Novel_003756"; | exon_number | "3"; | gene_type | " |
| scaffold2Cufflinks | exon | 116750  | 117199  | . | + | . | gene_id | "XLOC_265230"; | transcript_id | "Novel_003756"; | exon_number | "4"; | gene_type | " |
| scaffold2Cufflinks | exon | 115738  | 116033  | . | + | . | gene_id | "XLOC_265230"; | transcript_id | "Novel_003757"; | exon_number | "1"; | gene_type | " |
| scaffold2Cufflinks | exon | 116750  | 117175  | . | + | . | gene_id | "XLOC_265230"; | transcript_id | "Novel_003757"; | exon_number | "2"; | gene_type | " |
| scaffold2Cufflinks | exon | 55356   | 55620   | . | - | . | gene_id | "XLOC_265372"; | transcript_id | "Novel_003758"; | exon_number | "1"; | gene_type | " |
| scaffold2Cufflinks | exon | 183823  | 184456  | . | - | . | gene_id | "XLOC_265386"; | transcript_id | "Novel_003759"; | exon_number | "1"; | gene_type | " |
| scaffold2Cufflinks | exon | 193809  | 193863  | . | - | . | gene_id | "XLOC_265596"; | transcript_id | "Novel_003760"; | exon_number | "1"; | gene_type | " |

|                    |      |         |         |   |   |   |         |                |               |                 |             |      |           |   |
|--------------------|------|---------|---------|---|---|---|---------|----------------|---------------|-----------------|-------------|------|-----------|---|
| scaffold2Cufflinks | exon | 194406  | 194490  | . | - | . | gene_id | "XLOC_265596"; | transcript_id | "Novel_003760"; | exon_number | "2"; | gene_type | " |
| scaffold2Cufflinks | exon | 194756  | 194826  | . | - | . | gene_id | "XLOC_265596"; | transcript_id | "Novel_003760"; | exon_number | "3"; | gene_type | " |
| scaffold2Cufflinks | exon | 1228313 | 1228386 | . | + | . | gene_id | "XLOC_265822"; | transcript_id | "Novel_003761"; | exon_number | "1"; | gene_type | " |
| scaffold2Cufflinks | exon | 1228982 | 1230778 | . | + | . | gene_id | "XLOC_265822"; | transcript_id | "Novel_003761"; | exon_number | "2"; | gene_type | " |
| scaffold2Cufflinks | exon | 1248730 | 1248876 | . | + | . | gene_id | "XLOC_265826"; | transcript_id | "Novel_003762"; | exon_number | "1"; | gene_type | " |
| scaffold2Cufflinks | exon | 1249521 | 1251294 | . | + | . | gene_id | "XLOC_265826"; | transcript_id | "Novel_003762"; | exon_number | "2"; | gene_type | " |
| scaffold2Cufflinks | exon | 406900  | 407375  | . | - | . | gene_id | "XLOC_266079"; | transcript_id | "Novel_003763"; | exon_number | "1"; | gene_type | " |
| scaffold2Cufflinks | exon | 412862  | 412988  | . | - | . | gene_id | "XLOC_266079"; | transcript_id | "Novel_003763"; | exon_number | "2"; | gene_type | " |
| scaffold2Cufflinks | exon | 414769  | 414963  | . | - | . | gene_id | "XLOC_266079"; | transcript_id | "Novel_003763"; | exon_number | "3"; | gene_type | " |
| scaffold2Cufflinks | exon | 412612  | 412988  | . | - | . | gene_id | "XLOC_266079"; | transcript_id | "Novel_003764"; | exon_number | "1"; | gene_type | " |
| scaffold2Cufflinks | exon | 414769  | 414985  | . | - | . | gene_id | "XLOC_266079"; | transcript_id | "Novel_003764"; | exon_number | "2"; | gene_type | " |
| scaffold2Cufflinks | exon | 511045  | 511298  | . | - | . | gene_id | "XLOC_266084"; | transcript_id | "Novel_003765"; | exon_number | "1"; | gene_type | " |
| scaffold2Cufflinks | exon | 41613   | 42383   | . | - | . | gene_id | "XLOC_266219"; | transcript_id | "Novel_003766"; | exon_number | "1"; | gene_type | " |
| scaffold2Cufflinks | exon | 42532   | 42708   | . | - | . | gene_id | "XLOC_266219"; | transcript_id | "Novel_003766"; | exon_number | "2"; | gene_type | " |
| scaffold2Cufflinks | exon | 1210564 | 1212183 | . | + | . | gene_id | "XLOC_266490"; | transcript_id | "Novel_003767"; | exon_number | "1"; | gene_type | " |
| scaffold2Cufflinks | exon | 1880792 | 1881002 | . | - | . | gene_id | "XLOC_267204"; | transcript_id | "Novel_003768"; | exon_number | "1"; | gene_type | " |
| scaffold2Cufflinks | exon | 2722707 | 2723378 | . | - | . | gene_id | "XLOC_267348"; | transcript_id | "Novel_003769"; | exon_number | "1"; | gene_type | " |
| scaffold2Cufflinks | exon | 2723518 | 2723769 | . | - | . | gene_id | "XLOC_267348"; | transcript_id | "Novel_003769"; | exon_number | "2"; | gene_type | " |
| scaffold2Cufflinks | exon | 2722806 | 2723380 | . | - | . | gene_id | "XLOC_267348"; | transcript_id | "Novel_003770"; | exon_number | "1"; | gene_type | " |
| scaffold2Cufflinks | exon | 2723518 | 2723683 | . | - | . | gene_id | "XLOC_267348"; | transcript_id | "Novel_003770"; | exon_number | "2"; | gene_type | " |
| scaffold2Cufflinks | exon | 13439   | 13715   | . | - | . | gene_id | "XLOC_267609"; | transcript_id | "Novel_003771"; | exon_number | "1"; | gene_type | " |
| scaffold2Cufflinks | exon | 14050   | 14393   | . | - | . | gene_id | "XLOC_267609"; | transcript_id | "Novel_003771"; | exon_number | "2"; | gene_type | " |
| scaffold2Cufflinks | exon | 50449   | 50711   | . | + | . | gene_id | "XLOC_267798"; | transcript_id | "Novel_003772"; | exon_number | "1"; | gene_type | " |
| scaffold2Cufflinks | exon | 52490   | 52784   | . | + | . | gene_id | "XLOC_267798"; | transcript_id | "Novel_003772"; | exon_number | "2"; | gene_type | " |
| scaffold2Cufflinks | exon | 118856  | 119098  | . | + | . | gene_id | "XLOC_268047"; | transcript_id | "Novel_003773"; | exon_number | "1"; | gene_type | " |
| scaffold2Cufflinks | exon | 129262  | 129707  | . | + | . | gene_id | "XLOC_268122"; | transcript_id | "Novel_003774"; | exon_number | "1"; | gene_type | " |
| scaffold2Cufflinks | exon | 129820  | 129957  | . | + | . | gene_id | "XLOC_268122"; | transcript_id | "Novel_003774"; | exon_number | "2"; | gene_type | " |
| scaffold2Cufflinks | exon | 130052  | 130414  | . | + | . | gene_id | "XLOC_268122"; | transcript_id | "Novel_003774"; | exon_number | "3"; | gene_type | " |
| scaffold2Cufflinks | exon | 129314  | 129707  | . | + | . | gene_id | "XLOC_268122"; | transcript_id | "Novel_003775"; | exon_number | "1"; | gene_type | " |
| scaffold2Cufflinks | exon | 129820  | 130440  | . | + | . | gene_id | "XLOC_268122"; | transcript_id | "Novel_003775"; | exon_number | "2"; | gene_type | " |
| scaffold2Cufflinks | exon | 102046  | 102164  | . | + | . | gene_id | "XLOC_268182"; | transcript_id | "Novel_003776"; | exon_number | "1"; | gene_type | " |
| scaffold2Cufflinks | exon | 102490  | 102638  | . | + | . | gene_id | "XLOC_268182"; | transcript_id | "Novel_003776"; | exon_number | "2"; | gene_type | " |
| scaffold2Cufflinks | exon | 102737  | 102830  | . | + | . | gene_id | "XLOC_268182"; | transcript_id | "Novel_003776"; | exon_number | "3"; | gene_type | " |
| scaffold2Cufflinks | exon | 102913  | 103984  | . | + | . | gene_id | "XLOC_268182"; | transcript_id | "Novel_003776"; | exon_number | "4"; | gene_type | " |
| scaffold2Cufflinks | exon | 102046  | 102164  | . | + | . | gene_id | "XLOC_268182"; | transcript_id | "Novel_003777"; | exon_number | "1"; | gene_type | " |

|                    |      |         |         |   |   |   |         |                              |                             |                |   |
|--------------------|------|---------|---------|---|---|---|---------|------------------------------|-----------------------------|----------------|---|
| scaffold2Cufflinks | exon | 102501  | 102638  | . | + | . | gene_id | "XLOC_268182"; transcript_id | "Novel_003777"; exon_number | "2"; gene_type | " |
| scaffold2Cufflinks | exon | 102737  | 102830  | . | + | . | gene_id | "XLOC_268182"; transcript_id | "Novel_003777"; exon_number | "3"; gene_type | " |
| scaffold2Cufflinks | exon | 102913  | 103984  | . | + | . | gene_id | "XLOC_268182"; transcript_id | "Novel_003777"; exon_number | "4"; gene_type | " |
| scaffold2Cufflinks | exon | 102050  | 102638  | . | + | . | gene_id | "XLOC_268182"; transcript_id | "Novel_003778"; exon_number | "1"; gene_type | " |
| scaffold2Cufflinks | exon | 102737  | 102830  | . | + | . | gene_id | "XLOC_268182"; transcript_id | "Novel_003778"; exon_number | "2"; gene_type | " |
| scaffold2Cufflinks | exon | 102913  | 103950  | . | + | . | gene_id | "XLOC_268182"; transcript_id | "Novel_003778"; exon_number | "3"; gene_type | " |
| scaffold2Cufflinks | exon | 268197  | 268328  | . | + | . | gene_id | "XLOC_268208"; transcript_id | "Novel_003779"; exon_number | "1"; gene_type | " |
| scaffold2Cufflinks | exon | 268549  | 270713  | . | + | . | gene_id | "XLOC_268208"; transcript_id | "Novel_003779"; exon_number | "2"; gene_type | " |
| scaffold2Cufflinks | exon | 26830   | 26903   | . | - | . | gene_id | "XLOC_268435"; transcript_id | "Novel_003780"; exon_number | "1"; gene_type | " |
| scaffold2Cufflinks | exon | 27040   | 27315   | . | - | . | gene_id | "XLOC_268435"; transcript_id | "Novel_003780"; exon_number | "2"; gene_type | " |
| scaffold2Cufflinks | exon | 110468  | 110787  | . | - | . | gene_id | "XLOC_268455"; transcript_id | "Novel_003781"; exon_number | "1"; gene_type | " |
| scaffold2Cufflinks | exon | 111846  | 111892  | . | - | . | gene_id | "XLOC_268455"; transcript_id | "Novel_003781"; exon_number | "2"; gene_type | " |
| scaffold2Cufflinks | exon | 164270  | 164533  | . | + | . | gene_id | "XLOC_268546"; transcript_id | "Novel_003782"; exon_number | "1"; gene_type | " |
| scaffold2Cufflinks | exon | 164607  | 164854  | . | + | . | gene_id | "XLOC_268546"; transcript_id | "Novel_003782"; exon_number | "2"; gene_type | " |
| scaffold2Cufflinks | exon | 164932  | 165477  | . | + | . | gene_id | "XLOC_268546"; transcript_id | "Novel_003782"; exon_number | "3"; gene_type | " |
| scaffold2Cufflinks | exon | 27972   | 32117   | . | - | . | gene_id | "XLOC_268596"; transcript_id | "Novel_003783"; exon_number | "1"; gene_type | " |
| scaffold2Cufflinks | exon | 32519   | 32589   | . | - | . | gene_id | "XLOC_268596"; transcript_id | "Novel_003783"; exon_number | "2"; gene_type | " |
| scaffold2Cufflinks | exon | 32992   | 33087   | . | - | . | gene_id | "XLOC_268596"; transcript_id | "Novel_003783"; exon_number | "3"; gene_type | " |
| scaffold2Cufflinks | exon | 33923   | 34003   | . | - | . | gene_id | "XLOC_268596"; transcript_id | "Novel_003783"; exon_number | "4"; gene_type | " |
| scaffold2Cufflinks | exon | 127239  | 127523  | . | - | . | gene_id | "XLOC_268642"; transcript_id | "Novel_003784"; exon_number | "1"; gene_type | " |
| scaffold2Cufflinks | exon | 127613  | 128065  | . | - | . | gene_id | "XLOC_268642"; transcript_id | "Novel_003784"; exon_number | "2"; gene_type | " |
| scaffold2Cufflinks | exon | 128154  | 128822  | . | - | . | gene_id | "XLOC_268642"; transcript_id | "Novel_003784"; exon_number | "3"; gene_type | " |
| scaffold2Cufflinks | exon | 128934  | 129042  | . | - | . | gene_id | "XLOC_268642"; transcript_id | "Novel_003784"; exon_number | "4"; gene_type | " |
| scaffold2Cufflinks | exon | 129164  | 129411  | . | - | . | gene_id | "XLOC_268642"; transcript_id | "Novel_003784"; exon_number | "5"; gene_type | " |
| scaffold2Cufflinks | exon | 127259  | 127523  | . | - | . | gene_id | "XLOC_268642"; transcript_id | "Novel_003785"; exon_number | "1"; gene_type | " |
| scaffold2Cufflinks | exon | 127613  | 128065  | . | - | . | gene_id | "XLOC_268642"; transcript_id | "Novel_003785"; exon_number | "2"; gene_type | " |
| scaffold2Cufflinks | exon | 128154  | 128858  | . | - | . | gene_id | "XLOC_268642"; transcript_id | "Novel_003785"; exon_number | "3"; gene_type | " |
| scaffold2Cufflinks | exon | 1246644 | 1247962 | . | + | . | gene_id | "XLOC_268724"; transcript_id | "Novel_003786"; exon_number | "1"; gene_type | " |
| scaffold2Cufflinks | exon | 1048577 | 1048955 | . | + | . | gene_id | "XLOC_269080"; transcript_id | "Novel_003787"; exon_number | "1"; gene_type | " |
| scaffold2Cufflinks | exon | 1049036 | 1049375 | . | + | . | gene_id | "XLOC_269080"; transcript_id | "Novel_003787"; exon_number | "2"; gene_type | " |
| scaffold2Cufflinks | exon | 1049465 | 1049511 | . | + | . | gene_id | "XLOC_269080"; transcript_id | "Novel_003787"; exon_number | "3"; gene_type | " |
| scaffold2Cufflinks | exon | 1051088 | 1051129 | . | + | . | gene_id | "XLOC_269080"; transcript_id | "Novel_003787"; exon_number | "4"; gene_type | " |
| scaffold2Cufflinks | exon | 1051206 | 1051327 | . | + | . | gene_id | "XLOC_269080"; transcript_id | "Novel_003787"; exon_number | "5"; gene_type | " |
| scaffold2Cufflinks | exon | 1051406 | 1051514 | . | + | . | gene_id | "XLOC_269080"; transcript_id | "Novel_003787"; exon_number | "6"; gene_type | " |
| scaffold2Cufflinks | exon | 1051638 | 1052353 | . | + | . | gene_id | "XLOC_269080"; transcript_id | "Novel_003787"; exon_number | "7"; gene_type | " |





|                    |      |         |         |   |   |   |         |                              |                             |                |   |
|--------------------|------|---------|---------|---|---|---|---------|------------------------------|-----------------------------|----------------|---|
| scaffold2Cufflinks | exon | 11969   | 12283   | . | - | . | gene_id | "XLOC_269768"; transcript_id | "Novel_003795"; exon_number | "1"; gene_type | " |
| scaffold2Cufflinks | exon | 12441   | 12521   | . | - | . | gene_id | "XLOC_269768"; transcript_id | "Novel_003795"; exon_number | "2"; gene_type | " |
| scaffold2Cufflinks | exon | 12648   | 13402   | . | - | . | gene_id | "XLOC_269768"; transcript_id | "Novel_003795"; exon_number | "3"; gene_type | " |
| scaffold2Cufflinks | exon | 13944   | 14283   | . | - | . | gene_id | "XLOC_269768"; transcript_id | "Novel_003795"; exon_number | "4"; gene_type | " |
| scaffold2Cufflinks | exon | 40650   | 41198   | . | + | . | gene_id | "XLOC_269878"; transcript_id | "Novel_003796"; exon_number | "1"; gene_type | " |
| scaffold2Cufflinks | exon | 41298   | 42118   | . | + | . | gene_id | "XLOC_269878"; transcript_id | "Novel_003796"; exon_number | "2"; gene_type | " |
| scaffold2Cufflinks | exon | 177940  | 178161  | . | + | . | gene_id | "XLOC_270532"; transcript_id | "Novel_003797"; exon_number | "1"; gene_type | " |
| scaffold2Cufflinks | exon | 178840  | 180176  | . | + | . | gene_id | "XLOC_270532"; transcript_id | "Novel_003797"; exon_number | "2"; gene_type | " |
| scaffold2Cufflinks | exon | 102836  | 103809  | . | - | . | gene_id | "XLOC_270628"; transcript_id | "Novel_003798"; exon_number | "1"; gene_type | " |
| scaffold2Cufflinks | exon | 104096  | 104288  | . | - | . | gene_id | "XLOC_270628"; transcript_id | "Novel_003798"; exon_number | "2"; gene_type | " |
| scaffold2Cufflinks | exon | 1176450 | 1176460 | . | + | . | gene_id | "XLOC_270856"; transcript_id | "Novel_003799"; exon_number | "1"; gene_type | " |
| scaffold2Cufflinks | exon | 1177382 | 1179053 | . | + | . | gene_id | "XLOC_270856"; transcript_id | "Novel_003799"; exon_number | "2"; gene_type | " |
| scaffold2Cufflinks | exon | 1179165 | 1180019 | . | + | . | gene_id | "XLOC_270856"; transcript_id | "Novel_003799"; exon_number | "3"; gene_type | " |
| scaffold2Cufflinks | exon | 482045  | 485335  | . | - | . | gene_id | "XLOC_270932"; transcript_id | "Novel_003800"; exon_number | "1"; gene_type | " |
| scaffold2Cufflinks | exon | 485542  | 487294  | . | - | . | gene_id | "XLOC_270932"; transcript_id | "Novel_003800"; exon_number | "2"; gene_type | " |
| scaffold2Cufflinks | exon | 562498  | 563413  | . | - | . | gene_id | "XLOC_270945"; transcript_id | "Novel_003801"; exon_number | "1"; gene_type | " |
| scaffold2Cufflinks | exon | 563688  | 563957  | . | - | . | gene_id | "XLOC_270945"; transcript_id | "Novel_003801"; exon_number | "2"; gene_type | " |
| scaffold2Cufflinks | exon | 564024  | 564500  | . | - | . | gene_id | "XLOC_270945"; transcript_id | "Novel_003801"; exon_number | "3"; gene_type | " |
| scaffold2Cufflinks | exon | 566041  | 566984  | . | - | . | gene_id | "XLOC_270947"; transcript_id | "Novel_003802"; exon_number | "1"; gene_type | " |
| scaffold2Cufflinks | exon | 567967  | 568236  | . | - | . | gene_id | "XLOC_270947"; transcript_id | "Novel_003802"; exon_number | "2"; gene_type | " |
| scaffold2Cufflinks | exon | 568348  | 568993  | . | - | . | gene_id | "XLOC_270947"; transcript_id | "Novel_003802"; exon_number | "3"; gene_type | " |
| scaffold2Cufflinks | exon | 33995   | 34689   | . | + | . | gene_id | "XLOC_271146"; transcript_id | "Novel_003803"; exon_number | "1"; gene_type | " |
| scaffold2Cufflinks | exon | 1158608 | 1158645 | . | + | . | gene_id | "XLOC_271527"; transcript_id | "Novel_003804"; exon_number | "1"; gene_type | " |
| scaffold2Cufflinks | exon | 1158828 | 1158870 | . | + | . | gene_id | "XLOC_271527"; transcript_id | "Novel_003804"; exon_number | "2"; gene_type | " |
| scaffold2Cufflinks | exon | 1160440 | 1160512 | . | + | . | gene_id | "XLOC_271527"; transcript_id | "Novel_003804"; exon_number | "3"; gene_type | " |
| scaffold2Cufflinks | exon | 1160590 | 1160660 | . | + | . | gene_id | "XLOC_271527"; transcript_id | "Novel_003804"; exon_number | "4"; gene_type | " |
| scaffold2Cufflinks | exon | 1160876 | 1161697 | . | + | . | gene_id | "XLOC_271527"; transcript_id | "Novel_003804"; exon_number | "5"; gene_type | " |
| scaffold2Cufflinks | exon | 1158669 | 1158870 | . | + | . | gene_id | "XLOC_271527"; transcript_id | "Novel_003805"; exon_number | "1"; gene_type | " |
| scaffold2Cufflinks | exon | 1160440 | 1160512 | . | + | . | gene_id | "XLOC_271527"; transcript_id | "Novel_003805"; exon_number | "2"; gene_type | " |
| scaffold2Cufflinks | exon | 1160590 | 1160660 | . | + | . | gene_id | "XLOC_271527"; transcript_id | "Novel_003805"; exon_number | "3"; gene_type | " |
| scaffold2Cufflinks | exon | 1160876 | 1161697 | . | + | . | gene_id | "XLOC_271527"; transcript_id | "Novel_003805"; exon_number | "4"; gene_type | " |
| scaffold2Cufflinks | exon | 1159338 | 1160512 | . | + | . | gene_id | "XLOC_271527"; transcript_id | "Novel_003806"; exon_number | "1"; gene_type | " |
| scaffold2Cufflinks | exon | 1160590 | 1160660 | . | + | . | gene_id | "XLOC_271527"; transcript_id | "Novel_003806"; exon_number | "2"; gene_type | " |
| scaffold2Cufflinks | exon | 1160876 | 1161435 | . | + | . | gene_id | "XLOC_271527"; transcript_id | "Novel_003806"; exon_number | "3"; gene_type | " |
| scaffold2Cufflinks | exon | 764828  | 765657  | . | - | . | gene_id | "XLOC_271667"; transcript_id | "Novel_003807"; exon_number | "1"; gene_type | " |

|                    |      |        |        |   |   |   |         |                              |                             |                |   |
|--------------------|------|--------|--------|---|---|---|---------|------------------------------|-----------------------------|----------------|---|
| scaffold2Cufflinks | exon | 765756 | 765813 | . | - | . | gene_id | "XLOC_271667"; transcript_id | "Novel_003807"; exon_number | "2"; gene_type | " |
| scaffold2Cufflinks | exon | 766367 | 766436 | . | - | . | gene_id | "XLOC_271667"; transcript_id | "Novel_003807"; exon_number | "3"; gene_type | " |
| scaffold2Cufflinks | exon | 766658 | 767894 | . | - | . | gene_id | "XLOC_271667"; transcript_id | "Novel_003807"; exon_number | "4"; gene_type | " |
| scaffold2Cufflinks | exon | 764828 | 765657 | . | - | . | gene_id | "XLOC_271667"; transcript_id | "Novel_003808"; exon_number | "1"; gene_type | " |
| scaffold2Cufflinks | exon | 765756 | 765813 | . | - | . | gene_id | "XLOC_271667"; transcript_id | "Novel_003808"; exon_number | "2"; gene_type | " |
| scaffold2Cufflinks | exon | 766367 | 766436 | . | - | . | gene_id | "XLOC_271667"; transcript_id | "Novel_003808"; exon_number | "3"; gene_type | " |
| scaffold2Cufflinks | exon | 767147 | 767240 | . | - | . | gene_id | "XLOC_271667"; transcript_id | "Novel_003808"; exon_number | "4"; gene_type | " |
| scaffold2Cufflinks | exon | 768382 | 769054 | . | - | . | gene_id | "XLOC_271667"; transcript_id | "Novel_003808"; exon_number | "5"; gene_type | " |
| scaffold2Cufflinks | exon | 764834 | 765657 | . | - | . | gene_id | "XLOC_271667"; transcript_id | "Novel_003809"; exon_number | "1"; gene_type | " |
| scaffold2Cufflinks | exon | 765756 | 765813 | . | - | . | gene_id | "XLOC_271667"; transcript_id | "Novel_003809"; exon_number | "2"; gene_type | " |
| scaffold2Cufflinks | exon | 766367 | 766436 | . | - | . | gene_id | "XLOC_271667"; transcript_id | "Novel_003809"; exon_number | "3"; gene_type | " |
| scaffold2Cufflinks | exon | 767147 | 767240 | . | - | . | gene_id | "XLOC_271667"; transcript_id | "Novel_003809"; exon_number | "4"; gene_type | " |
| scaffold2Cufflinks | exon | 768382 | 768461 | . | - | . | gene_id | "XLOC_271667"; transcript_id | "Novel_003809"; exon_number | "5"; gene_type | " |
| scaffold2Cufflinks | exon | 768751 | 769044 | . | - | . | gene_id | "XLOC_271667"; transcript_id | "Novel_003809"; exon_number | "6"; gene_type | " |
| scaffold2Cufflinks | exon | 764842 | 765657 | . | - | . | gene_id | "XLOC_271667"; transcript_id | "Novel_003810"; exon_number | "1"; gene_type | " |
| scaffold2Cufflinks | exon | 765756 | 765813 | . | - | . | gene_id | "XLOC_271667"; transcript_id | "Novel_003810"; exon_number | "2"; gene_type | " |
| scaffold2Cufflinks | exon | 766367 | 766436 | . | - | . | gene_id | "XLOC_271667"; transcript_id | "Novel_003810"; exon_number | "3"; gene_type | " |
| scaffold2Cufflinks | exon | 766658 | 766755 | . | - | . | gene_id | "XLOC_271667"; transcript_id | "Novel_003810"; exon_number | "4"; gene_type | " |
| scaffold2Cufflinks | exon | 767147 | 767240 | . | - | . | gene_id | "XLOC_271667"; transcript_id | "Novel_003810"; exon_number | "5"; gene_type | " |
| scaffold2Cufflinks | exon | 768382 | 768461 | . | - | . | gene_id | "XLOC_271667"; transcript_id | "Novel_003810"; exon_number | "6"; gene_type | " |
| scaffold2Cufflinks | exon | 768544 | 769062 | . | - | . | gene_id | "XLOC_271667"; transcript_id | "Novel_003810"; exon_number | "7"; gene_type | " |
| scaffold2Cufflinks | exon | 967359 | 967538 | . | + | . | gene_id | "XLOC_271780"; transcript_id | "Novel_003811"; exon_number | "1"; gene_type | " |
| scaffold2Cufflinks | exon | 967627 | 967739 | . | + | . | gene_id | "XLOC_271780"; transcript_id | "Novel_003811"; exon_number | "2"; gene_type | " |
| scaffold2Cufflinks | exon | 968135 | 968158 | . | + | . | gene_id | "XLOC_271780"; transcript_id | "Novel_003811"; exon_number | "3"; gene_type | " |
| scaffold2Cufflinks | exon | 968751 | 968851 | . | + | . | gene_id | "XLOC_271780"; transcript_id | "Novel_003811"; exon_number | "4"; gene_type | " |
| scaffold2Cufflinks | exon | 968968 | 969086 | . | + | . | gene_id | "XLOC_271780"; transcript_id | "Novel_003811"; exon_number | "5"; gene_type | " |
| scaffold2Cufflinks | exon | 967365 | 967538 | . | + | . | gene_id | "XLOC_271780"; transcript_id | "Novel_003812"; exon_number | "1"; gene_type | " |
| scaffold2Cufflinks | exon | 967627 | 968851 | . | + | . | gene_id | "XLOC_271780"; transcript_id | "Novel_003812"; exon_number | "2"; gene_type | " |
| scaffold2Cufflinks | exon | 968968 | 969070 | . | + | . | gene_id | "XLOC_271780"; transcript_id | "Novel_003812"; exon_number | "3"; gene_type | " |
| scaffold2Cufflinks | exon | 636490 | 636594 | . | - | . | gene_id | "XLOC_271862"; transcript_id | "Novel_003813"; exon_number | "1"; gene_type | " |
| scaffold2Cufflinks | exon | 636735 | 636818 | . | - | . | gene_id | "XLOC_271862"; transcript_id | "Novel_003813"; exon_number | "2"; gene_type | " |
| scaffold2Cufflinks | exon | 636894 | 637066 | . | - | . | gene_id | "XLOC_271862"; transcript_id | "Novel_003813"; exon_number | "3"; gene_type | " |
| scaffold2Cufflinks | exon | 174799 | 175017 | . | - | . | gene_id | "XLOC_271927"; transcript_id | "Novel_003814"; exon_number | "1"; gene_type | " |
| scaffold2Cufflinks | exon | 42425  | 42729  | . | + | . | gene_id | "XLOC_271936"; transcript_id | "Novel_003815"; exon_number | "1"; gene_type | " |
| scaffold2Cufflinks | exon | 42812  | 42837  | . | + | . | gene_id | "XLOC_271936"; transcript_id | "Novel_003815"; exon_number | "2"; gene_type | " |

|                    |      |         |         |   |   |   |         |                              |                             |                |   |
|--------------------|------|---------|---------|---|---|---|---------|------------------------------|-----------------------------|----------------|---|
| scaffold2Cufflinks | exon | 43432   | 43521   | . | + | . | gene_id | "XLOC_271936"; transcript_id | "Novel_003815"; exon_number | "3"; gene_type | " |
| scaffold2Cufflinks | exon | 43620   | 43708   | . | + | . | gene_id | "XLOC_271936"; transcript_id | "Novel_003815"; exon_number | "4"; gene_type | " |
| scaffold2Cufflinks | exon | 44467   | 46092   | . | + | . | gene_id | "XLOC_271936"; transcript_id | "Novel_003815"; exon_number | "5"; gene_type | " |
| scaffold3Cufflinks | exon | 45208   | 45411   | . | - | . | gene_id | "XLOC_272262"; transcript_id | "Novel_003816"; exon_number | "1"; gene_type | " |
| scaffold3Cufflinks | exon | 44691   | 44792   | . | + | . | gene_id | "XLOC_272409"; transcript_id | "Novel_003817"; exon_number | "1"; gene_type | " |
| scaffold3Cufflinks | exon | 44883   | 45014   | . | + | . | gene_id | "XLOC_272409"; transcript_id | "Novel_003817"; exon_number | "2"; gene_type | " |
| scaffold3Cufflinks | exon | 423710  | 423749  | . | + | . | gene_id | "XLOC_272540"; transcript_id | "Novel_003818"; exon_number | "1"; gene_type | " |
| scaffold3Cufflinks | exon | 423848  | 423934  | . | + | . | gene_id | "XLOC_272540"; transcript_id | "Novel_003818"; exon_number | "2"; gene_type | " |
| scaffold3Cufflinks | exon | 424618  | 424720  | . | + | . | gene_id | "XLOC_272540"; transcript_id | "Novel_003818"; exon_number | "3"; gene_type | " |
| scaffold3Cufflinks | exon | 425082  | 425148  | . | + | . | gene_id | "XLOC_272540"; transcript_id | "Novel_003818"; exon_number | "4"; gene_type | " |
| scaffold3Cufflinks | exon | 425287  | 425499  | . | + | . | gene_id | "XLOC_272540"; transcript_id | "Novel_003818"; exon_number | "5"; gene_type | " |
| scaffold3Cufflinks | exon | 926193  | 929982  | . | - | . | gene_id | "XLOC_272819"; transcript_id | "Novel_003819"; exon_number | "1"; gene_type | " |
| scaffold3Cufflinks | exon | 930380  | 931074  | . | - | . | gene_id | "XLOC_272819"; transcript_id | "Novel_003819"; exon_number | "2"; gene_type | " |
| scaffold3Cufflinks | exon | 926208  | 928447  | . | - | . | gene_id | "XLOC_272819"; transcript_id | "Novel_003820"; exon_number | "1"; gene_type | " |
| scaffold3Cufflinks | exon | 928583  | 929982  | . | - | . | gene_id | "XLOC_272819"; transcript_id | "Novel_003820"; exon_number | "2"; gene_type | " |
| scaffold3Cufflinks | exon | 930380  | 930704  | . | - | . | gene_id | "XLOC_272819"; transcript_id | "Novel_003820"; exon_number | "3"; gene_type | " |
| scaffold3Cufflinks | exon | 930979  | 931120  | . | - | . | gene_id | "XLOC_272819"; transcript_id | "Novel_003820"; exon_number | "4"; gene_type | " |
| scaffold3Cufflinks | exon | 1236297 | 1237209 | . | - | . | gene_id | "XLOC_272850"; transcript_id | "Novel_003821"; exon_number | "1"; gene_type | " |
| scaffold3Cufflinks | exon | 1237392 | 1237949 | . | - | . | gene_id | "XLOC_272850"; transcript_id | "Novel_003821"; exon_number | "2"; gene_type | " |
| scaffold3Cufflinks | exon | 265669  | 266008  | . | + | . | gene_id | "XLOC_273042"; transcript_id | "Novel_003822"; exon_number | "1"; gene_type | " |
| scaffold3Cufflinks | exon | 266687  | 266828  | . | + | . | gene_id | "XLOC_273042"; transcript_id | "Novel_003822"; exon_number | "2"; gene_type | " |
| scaffold3Cufflinks | exon | 267256  | 267342  | . | + | . | gene_id | "XLOC_273042"; transcript_id | "Novel_003822"; exon_number | "3"; gene_type | " |
| scaffold3Cufflinks | exon | 268264  | 268304  | . | + | . | gene_id | "XLOC_273042"; transcript_id | "Novel_003822"; exon_number | "4"; gene_type | " |
| scaffold3Cufflinks | exon | 268585  | 268647  | . | + | . | gene_id | "XLOC_273042"; transcript_id | "Novel_003822"; exon_number | "5"; gene_type | " |
| scaffold3Cufflinks | exon | 268725  | 268836  | . | + | . | gene_id | "XLOC_273042"; transcript_id | "Novel_003822"; exon_number | "6"; gene_type | " |
| scaffold3Cufflinks | exon | 269084  | 269162  | . | + | . | gene_id | "XLOC_273042"; transcript_id | "Novel_003822"; exon_number | "7"; gene_type | " |
| scaffold3Cufflinks | exon | 269488  | 270091  | . | + | . | gene_id | "XLOC_273042"; transcript_id | "Novel_003822"; exon_number | "8"; gene_type | " |
| scaffold3Cufflinks | exon | 265708  | 266828  | . | + | . | gene_id | "XLOC_273042"; transcript_id | "Novel_003823"; exon_number | "1"; gene_type | " |
| scaffold3Cufflinks | exon | 267256  | 267342  | . | + | . | gene_id | "XLOC_273042"; transcript_id | "Novel_003823"; exon_number | "2"; gene_type | " |
| scaffold3Cufflinks | exon | 268264  | 268304  | . | + | . | gene_id | "XLOC_273042"; transcript_id | "Novel_003823"; exon_number | "3"; gene_type | " |
| scaffold3Cufflinks | exon | 268585  | 268647  | . | + | . | gene_id | "XLOC_273042"; transcript_id | "Novel_003823"; exon_number | "4"; gene_type | " |
| scaffold3Cufflinks | exon | 268743  | 268836  | . | + | . | gene_id | "XLOC_273042"; transcript_id | "Novel_003823"; exon_number | "5"; gene_type | " |
| scaffold3Cufflinks | exon | 269084  | 269162  | . | + | . | gene_id | "XLOC_273042"; transcript_id | "Novel_003823"; exon_number | "6"; gene_type | " |
| scaffold3Cufflinks | exon | 269488  | 270189  | . | + | . | gene_id | "XLOC_273042"; transcript_id | "Novel_003823"; exon_number | "7"; gene_type | " |
| scaffold3Cufflinks | exon | 265730  | 267342  | . | + | . | gene_id | "XLOC_273042"; transcript_id | "Novel_003824"; exon_number | "1"; gene_type | " |

|                         |        |        |   |   |   |                                                                                    |
|-------------------------|--------|--------|---|---|---|------------------------------------------------------------------------------------|
| scaffold:Cufflinks:exon | 268264 | 268304 | . | + | . | gene_id "XLOC_273042"; transcript_id "Novel_003824"; exon_number "2"; gene_type "  |
| scaffold:Cufflinks:exon | 268585 | 268647 | . | + | . | gene_id "XLOC_273042"; transcript_id "Novel_003824"; exon_number "3"; gene_type "  |
| scaffold:Cufflinks:exon | 268725 | 268836 | . | + | . | gene_id "XLOC_273042"; transcript_id "Novel_003824"; exon_number "4"; gene_type "  |
| scaffold:Cufflinks:exon | 269084 | 269162 | . | + | . | gene_id "XLOC_273042"; transcript_id "Novel_003824"; exon_number "5"; gene_type "  |
| scaffold:Cufflinks:exon | 269488 | 270216 | . | + | . | gene_id "XLOC_273042"; transcript_id "Novel_003824"; exon_number "6"; gene_type "  |
| scaffold:Cufflinks:exon | 67239  | 68221  | . | + | . | gene_id "XLOC_273329"; transcript_id "Novel_003825"; exon_number "1"; gene_type "  |
| scaffold:Cufflinks:exon | 68496  | 68816  | . | + | . | gene_id "XLOC_273329"; transcript_id "Novel_003825"; exon_number "2"; gene_type "  |
| scaffold:Cufflinks:exon | 35534  | 37820  | . | + | . | gene_id "XLOC_273384"; transcript_id "Novel_003826"; exon_number "1"; gene_type "  |
| scaffold:Cufflinks:exon | 43738  | 45861  | . | + | . | gene_id "XLOC_273384"; transcript_id "Novel_003826"; exon_number "2"; gene_type "  |
| scaffold:Cufflinks:exon | 118215 | 118566 | . | + | . | gene_id "XLOC_273659"; transcript_id "Novel_003827"; exon_number "1"; gene_type "  |
| scaffold:Cufflinks:exon | 119011 | 119109 | . | + | . | gene_id "XLOC_273659"; transcript_id "Novel_003827"; exon_number "2"; gene_type "  |
| scaffold:Cufflinks:exon | 145190 | 145660 | . | + | . | gene_id "XLOC_273662"; transcript_id "Novel_003828"; exon_number "1"; gene_type "  |
| scaffold:Cufflinks:exon | 145802 | 145877 | . | + | . | gene_id "XLOC_273662"; transcript_id "Novel_003828"; exon_number "2"; gene_type "  |
| scaffold:Cufflinks:exon | 146504 | 146924 | . | + | . | gene_id "XLOC_273662"; transcript_id "Novel_003828"; exon_number "3"; gene_type "  |
| scaffold:Cufflinks:exon | 145281 | 145660 | . | + | . | gene_id "XLOC_273662"; transcript_id "Novel_003829"; exon_number "1"; gene_type "  |
| scaffold:Cufflinks:exon | 145802 | 146923 | . | + | . | gene_id "XLOC_273662"; transcript_id "Novel_003829"; exon_number "2"; gene_type "  |
| scaffold:Cufflinks:exon | 1964   | 2455   | . | - | . | gene_id "XLOC_273665"; transcript_id "Novel_003830"; exon_number "1"; gene_type "  |
| scaffold:Cufflinks:exon | 2551   | 2936   | . | - | . | gene_id "XLOC_273665"; transcript_id "Novel_003830"; exon_number "2"; gene_type "  |
| scaffold:Cufflinks:exon | 3096   | 3245   | . | - | . | gene_id "XLOC_273665"; transcript_id "Novel_003831"; exon_number "1"; gene_type "  |
| scaffold:Cufflinks:exon | 3595   | 3652   | . | - | . | gene_id "XLOC_273665"; transcript_id "Novel_003831"; exon_number "2"; gene_type "  |
| scaffold:Cufflinks:exon | 3931   | 4031   | . | - | . | gene_id "XLOC_273665"; transcript_id "Novel_003831"; exon_number "3"; gene_type "  |
| scaffold:Cufflinks:exon | 4139   | 4201   | . | - | . | gene_id "XLOC_273665"; transcript_id "Novel_003831"; exon_number "4"; gene_type "  |
| scaffold:Cufflinks:exon | 4744   | 4804   | . | - | . | gene_id "XLOC_273665"; transcript_id "Novel_003831"; exon_number "5"; gene_type "  |
| scaffold:Cufflinks:exon | 4916   | 5636   | . | - | . | gene_id "XLOC_273665"; transcript_id "Novel_003831"; exon_number "6"; gene_type "  |
| scaffold:Cufflinks:exon | 5742   | 5790   | . | - | . | gene_id "XLOC_273665"; transcript_id "Novel_003831"; exon_number "7"; gene_type "  |
| scaffold:Cufflinks:exon | 6025   | 6088   | . | - | . | gene_id "XLOC_273665"; transcript_id "Novel_003831"; exon_number "8"; gene_type "  |
| scaffold:Cufflinks:exon | 6314   | 6633   | . | - | . | gene_id "XLOC_273665"; transcript_id "Novel_003831"; exon_number "9"; gene_type "  |
| scaffold:Cufflinks:exon | 6941   | 7884   | . | - | . | gene_id "XLOC_273665"; transcript_id "Novel_003831"; exon_number "10"; gene_type " |
| scaffold:Cufflinks:exon | 7989   | 8453   | . | - | . | gene_id "XLOC_273665"; transcript_id "Novel_003831"; exon_number "11"; gene_type " |
| scaffold:Cufflinks:exon | 29328  | 31426  | . | - | . | gene_id "XLOC_273668"; transcript_id "Novel_003832"; exon_number "1"; gene_type "  |
| scaffold:Cufflinks:exon | 31946  | 32092  | . | - | . | gene_id "XLOC_273668"; transcript_id "Novel_003832"; exon_number "2"; gene_type "  |
| scaffold:Cufflinks:exon | 121937 | 123865 | . | - | . | gene_id "XLOC_273679"; transcript_id "Novel_003833"; exon_number "1"; gene_type "  |
| scaffold:Cufflinks:exon | 125035 | 125108 | . | - | . | gene_id "XLOC_273679"; transcript_id "Novel_003833"; exon_number "2"; gene_type "  |
| scaffold:Cufflinks:exon | 121970 | 123865 | . | - | . | gene_id "XLOC_273679"; transcript_id "Novel_003834"; exon_number "1"; gene_type "  |
| scaffold:Cufflinks:exon | 124162 | 124276 | . | - | . | gene_id "XLOC_273679"; transcript_id "Novel_003834"; exon_number "2"; gene_type "  |





|                         |         |         |   |   |   |                                                                                   |
|-------------------------|---------|---------|---|---|---|-----------------------------------------------------------------------------------|
| scaffold:Cufflinks:exon | 1877    | 2820    | . | - | . | gene_id "XLOC_273903"; transcript_id "Novel_003845"; exon_number "1"; gene_type " |
| scaffold:Cufflinks:exon | 3000    | 5264    | . | - | . | gene_id "XLOC_273903"; transcript_id "Novel_003845"; exon_number "2"; gene_type " |
| scaffold:Cufflinks:exon | 5781    | 6181    | . | - | . | gene_id "XLOC_273903"; transcript_id "Novel_003845"; exon_number "3"; gene_type " |
| scaffold:Cufflinks:exon | 44405   | 44666   | . | - | . | gene_id "XLOC_273966"; transcript_id "Novel_003846"; exon_number "1"; gene_type " |
| scaffold:Cufflinks:exon | 44757   | 44784   | . | - | . | gene_id "XLOC_273966"; transcript_id "Novel_003846"; exon_number "2"; gene_type " |
| scaffold:Cufflinks:exon | 441570  | 442230  | . | + | . | gene_id "XLOC_274369"; transcript_id "Novel_003847"; exon_number "1"; gene_type " |
| scaffold:Cufflinks:exon | 493385  | 493586  | . | + | . | gene_id "XLOC_274380"; transcript_id "Novel_003848"; exon_number "1"; gene_type " |
| scaffold:Cufflinks:exon | 569395  | 569610  | . | + | . | gene_id "XLOC_274396"; transcript_id "Novel_003849"; exon_number "1"; gene_type " |
| scaffold:Cufflinks:exon | 623971  | 624760  | . | + | . | gene_id "XLOC_274407"; transcript_id "Novel_003850"; exon_number "1"; gene_type " |
| scaffold:Cufflinks:exon | 626309  | 626470  | . | + | . | gene_id "XLOC_274407"; transcript_id "Novel_003850"; exon_number "2"; gene_type " |
| scaffold:Cufflinks:exon | 626583  | 626887  | . | + | . | gene_id "XLOC_274407"; transcript_id "Novel_003850"; exon_number "3"; gene_type " |
| scaffold:Cufflinks:exon | 624014  | 624400  | . | + | . | gene_id "XLOC_274407"; transcript_id "Novel_003851"; exon_number "1"; gene_type " |
| scaffold:Cufflinks:exon | 624595  | 624760  | . | + | . | gene_id "XLOC_274407"; transcript_id "Novel_003851"; exon_number "2"; gene_type " |
| scaffold:Cufflinks:exon | 626309  | 626470  | . | + | . | gene_id "XLOC_274407"; transcript_id "Novel_003851"; exon_number "3"; gene_type " |
| scaffold:Cufflinks:exon | 626583  | 626974  | . | + | . | gene_id "XLOC_274407"; transcript_id "Novel_003851"; exon_number "4"; gene_type " |
| scaffold:Cufflinks:exon | 624015  | 624400  | . | + | . | gene_id "XLOC_274407"; transcript_id "Novel_003852"; exon_number "1"; gene_type " |
| scaffold:Cufflinks:exon | 624595  | 625663  | . | + | . | gene_id "XLOC_274407"; transcript_id "Novel_003852"; exon_number "2"; gene_type " |
| scaffold:Cufflinks:exon | 1232958 | 1233085 | . | + | . | gene_id "XLOC_274455"; transcript_id "Novel_003853"; exon_number "1"; gene_type " |
| scaffold:Cufflinks:exon | 1233179 | 1233265 | . | + | . | gene_id "XLOC_274455"; transcript_id "Novel_003853"; exon_number "2"; gene_type " |
| scaffold:Cufflinks:exon | 1233358 | 1233460 | . | + | . | gene_id "XLOC_274455"; transcript_id "Novel_003853"; exon_number "3"; gene_type " |
| scaffold:Cufflinks:exon | 1234008 | 1234074 | . | + | . | gene_id "XLOC_274455"; transcript_id "Novel_003853"; exon_number "4"; gene_type " |
| scaffold:Cufflinks:exon | 1234154 | 1234434 | . | + | . | gene_id "XLOC_274455"; transcript_id "Novel_003853"; exon_number "5"; gene_type " |
| scaffold:Cufflinks:exon | 919829  | 920042  | . | - | . | gene_id "XLOC_274545"; transcript_id "Novel_003854"; exon_number "1"; gene_type " |
| scaffold:Cufflinks:exon | 79660   | 79879   | . | + | . | gene_id "XLOC_274636"; transcript_id "Novel_003855"; exon_number "1"; gene_type " |
| scaffold:Cufflinks:exon | 105117  | 106266  | . | - | . | gene_id "XLOC_274658"; transcript_id "Novel_003856"; exon_number "1"; gene_type " |
| scaffold:Cufflinks:exon | 107980  | 108025  | . | - | . | gene_id "XLOC_274658"; transcript_id "Novel_003856"; exon_number "2"; gene_type " |
| scaffold:Cufflinks:exon | 108366  | 108503  | . | - | . | gene_id "XLOC_274658"; transcript_id "Novel_003856"; exon_number "3"; gene_type " |
| scaffold:Cufflinks:exon | 97822   | 98027   | . | - | . | gene_id "XLOC_275198"; transcript_id "Novel_003857"; exon_number "1"; gene_type " |
| scaffold:Cufflinks:exon | 779637  | 779854  | . | - | . | gene_id "XLOC_275296"; transcript_id "Novel_003858"; exon_number "1"; gene_type " |
| scaffold:Cufflinks:exon | 118038  | 118425  | . | + | . | gene_id "XLOC_275341"; transcript_id "Novel_003859"; exon_number "1"; gene_type " |
| scaffold:Cufflinks:exon | 118513  | 118730  | . | + | . | gene_id "XLOC_275341"; transcript_id "Novel_003859"; exon_number "2"; gene_type " |
| scaffold:Cufflinks:exon | 118811  | 119174  | . | + | . | gene_id "XLOC_275341"; transcript_id "Novel_003859"; exon_number "3"; gene_type " |
| scaffold:Cufflinks:exon | 118073  | 118425  | . | + | . | gene_id "XLOC_275341"; transcript_id "Novel_003860"; exon_number "1"; gene_type " |
| scaffold:Cufflinks:exon | 118513  | 119210  | . | + | . | gene_id "XLOC_275341"; transcript_id "Novel_003860"; exon_number "2"; gene_type " |
| scaffold:Cufflinks:exon | 16612   | 16773   | . | + | . | gene_id "XLOC_275364"; transcript_id "Novel_003861"; exon_number "1"; gene_type " |

|                         |        |        |   |   |   |                                                                                    |
|-------------------------|--------|--------|---|---|---|------------------------------------------------------------------------------------|
| scaffold:Cufflinks:exon | 17062  | 17657  | . | + | . | gene_id "XLOC_275364"; transcript_id "Novel_003861"; exon_number "2"; gene_type "  |
| scaffold:Cufflinks:exon | 17888  | 17957  | . | + | . | gene_id "XLOC_275364"; transcript_id "Novel_003861"; exon_number "3"; gene_type "  |
| scaffold:Cufflinks:exon | 18115  | 18181  | . | + | . | gene_id "XLOC_275364"; transcript_id "Novel_003861"; exon_number "4"; gene_type "  |
| scaffold:Cufflinks:exon | 19297  | 20904  | . | + | . | gene_id "XLOC_275364"; transcript_id "Novel_003861"; exon_number "5"; gene_type "  |
| scaffold:Cufflinks:exon | 979888 | 980502 | . | + | . | gene_id "XLOC_275647"; transcript_id "Novel_003862"; exon_number "1"; gene_type "  |
| scaffold:Cufflinks:exon | 981150 | 981262 | . | + | . | gene_id "XLOC_275647"; transcript_id "Novel_003862"; exon_number "2"; gene_type "  |
| scaffold:Cufflinks:exon | 981341 | 981436 | . | + | . | gene_id "XLOC_275647"; transcript_id "Novel_003862"; exon_number "3"; gene_type "  |
| scaffold:Cufflinks:exon | 981710 | 981766 | . | + | . | gene_id "XLOC_275647"; transcript_id "Novel_003862"; exon_number "4"; gene_type "  |
| scaffold:Cufflinks:exon | 981869 | 982024 | . | + | . | gene_id "XLOC_275647"; transcript_id "Novel_003862"; exon_number "5"; gene_type "  |
| scaffold:Cufflinks:exon | 982131 | 982215 | . | + | . | gene_id "XLOC_275647"; transcript_id "Novel_003862"; exon_number "6"; gene_type "  |
| scaffold:Cufflinks:exon | 982295 | 982385 | . | + | . | gene_id "XLOC_275647"; transcript_id "Novel_003862"; exon_number "7"; gene_type "  |
| scaffold:Cufflinks:exon | 982472 | 982636 | . | + | . | gene_id "XLOC_275647"; transcript_id "Novel_003862"; exon_number "8"; gene_type "  |
| scaffold:Cufflinks:exon | 982763 | 982958 | . | + | . | gene_id "XLOC_275647"; transcript_id "Novel_003862"; exon_number "9"; gene_type "  |
| scaffold:Cufflinks:exon | 983062 | 983200 | . | + | . | gene_id "XLOC_275647"; transcript_id "Novel_003862"; exon_number "10"; gene_type " |
| scaffold:Cufflinks:exon | 983296 | 985148 | . | + | . | gene_id "XLOC_275647"; transcript_id "Novel_003862"; exon_number "11"; gene_type " |
| scaffold:Cufflinks:exon | 985373 | 985563 | . | + | . | gene_id "XLOC_275647"; transcript_id "Novel_003862"; exon_number "12"; gene_type " |
| scaffold:Cufflinks:exon | 985656 | 986344 | . | + | . | gene_id "XLOC_275647"; transcript_id "Novel_003862"; exon_number "13"; gene_type " |
| scaffold:Cufflinks:exon | 979890 | 980502 | . | + | . | gene_id "XLOC_275647"; transcript_id "Novel_003863"; exon_number "1"; gene_type "  |
| scaffold:Cufflinks:exon | 981150 | 981262 | . | + | . | gene_id "XLOC_275647"; transcript_id "Novel_003863"; exon_number "2"; gene_type "  |
| scaffold:Cufflinks:exon | 981341 | 981436 | . | + | . | gene_id "XLOC_275647"; transcript_id "Novel_003863"; exon_number "3"; gene_type "  |
| scaffold:Cufflinks:exon | 981710 | 981766 | . | + | . | gene_id "XLOC_275647"; transcript_id "Novel_003863"; exon_number "4"; gene_type "  |
| scaffold:Cufflinks:exon | 981869 | 982024 | . | + | . | gene_id "XLOC_275647"; transcript_id "Novel_003863"; exon_number "5"; gene_type "  |
| scaffold:Cufflinks:exon | 982131 | 982385 | . | + | . | gene_id "XLOC_275647"; transcript_id "Novel_003863"; exon_number "6"; gene_type "  |
| scaffold:Cufflinks:exon | 982472 | 982636 | . | + | . | gene_id "XLOC_275647"; transcript_id "Novel_003863"; exon_number "7"; gene_type "  |
| scaffold:Cufflinks:exon | 982763 | 982958 | . | + | . | gene_id "XLOC_275647"; transcript_id "Novel_003863"; exon_number "8"; gene_type "  |
| scaffold:Cufflinks:exon | 983062 | 983200 | . | + | . | gene_id "XLOC_275647"; transcript_id "Novel_003863"; exon_number "9"; gene_type "  |
| scaffold:Cufflinks:exon | 983296 | 985148 | . | + | . | gene_id "XLOC_275647"; transcript_id "Novel_003863"; exon_number "10"; gene_type " |
| scaffold:Cufflinks:exon | 985373 | 985563 | . | + | . | gene_id "XLOC_275647"; transcript_id "Novel_003863"; exon_number "11"; gene_type " |
| scaffold:Cufflinks:exon | 985656 | 986306 | . | + | . | gene_id "XLOC_275647"; transcript_id "Novel_003863"; exon_number "12"; gene_type " |
| scaffold:Cufflinks:exon | 118975 | 119362 | . | - | . | gene_id "XLOC_275990"; transcript_id "Novel_003864"; exon_number "1"; gene_type "  |
| scaffold:Cufflinks:exon | 119444 | 120200 | . | - | . | gene_id "XLOC_275990"; transcript_id "Novel_003864"; exon_number "2"; gene_type "  |
| scaffold:Cufflinks:exon | 14872  | 15668  | . | + | . | gene_id "XLOC_276022"; transcript_id "Novel_003865"; exon_number "1"; gene_type "  |
| scaffold:Cufflinks:exon | 16836  | 17621  | . | + | . | gene_id "XLOC_276022"; transcript_id "Novel_003865"; exon_number "2"; gene_type "  |
| scaffold:Cufflinks:exon | 19300  | 19473  | . | + | . | gene_id "XLOC_276022"; transcript_id "Novel_003865"; exon_number "3"; gene_type "  |
| scaffold:Cufflinks:exon | 19926  | 20529  | . | + | . | gene_id "XLOC_276022"; transcript_id "Novel_003865"; exon_number "4"; gene_type "  |



|                         |         |         |   |   |   |                                                                                    |
|-------------------------|---------|---------|---|---|---|------------------------------------------------------------------------------------|
| scaffold:Cufflinks:exon | 76570   | 77271   | . | + | . | gene_id "XLOC_276034"; transcript_id "Novel_003866"; exon_number "1"; gene_type "  |
| scaffold:Cufflinks:exon | 78063   | 78130   | . | + | . | gene_id "XLOC_276034"; transcript_id "Novel_003866"; exon_number "2"; gene_type "  |
| scaffold:Cufflinks:exon | 41665   | 43527   | . | - | . | gene_id "XLOC_276037"; transcript_id "Novel_003867"; exon_number "1"; gene_type "  |
| scaffold:Cufflinks:exon | 1       | 2729    | . | + | . | gene_id "XLOC_276043"; transcript_id "Novel_003868"; exon_number "1"; gene_type "  |
| scaffold:Cufflinks:exon | 85619   | 86300   | . | + | . | gene_id "XLOC_276133"; transcript_id "Novel_003869"; exon_number "1"; gene_type "  |
| scaffold:Cufflinks:exon | 86376   | 86486   | . | + | . | gene_id "XLOC_276133"; transcript_id "Novel_003869"; exon_number "2"; gene_type "  |
| scaffold:Cufflinks:exon | 86573   | 86789   | . | + | . | gene_id "XLOC_276133"; transcript_id "Novel_003869"; exon_number "3"; gene_type "  |
| scaffold:Cufflinks:exon | 86886   | 87219   | . | + | . | gene_id "XLOC_276133"; transcript_id "Novel_003869"; exon_number "4"; gene_type "  |
| scaffold:Cufflinks:exon | 87350   | 87411   | . | + | . | gene_id "XLOC_276133"; transcript_id "Novel_003869"; exon_number "5"; gene_type "  |
| scaffold:Cufflinks:exon | 87506   | 87578   | . | + | . | gene_id "XLOC_276133"; transcript_id "Novel_003869"; exon_number "6"; gene_type "  |
| scaffold:Cufflinks:exon | 88502   | 89011   | . | + | . | gene_id "XLOC_276133"; transcript_id "Novel_003869"; exon_number "7"; gene_type "  |
| scaffold:Cufflinks:exon | 8       | 584     | . | + | . | gene_id "XLOC_276266"; transcript_id "Novel_003870"; exon_number "1"; gene_type "  |
| scaffold:Cufflinks:exon | 833     | 1044    | . | + | . | gene_id "XLOC_276266"; transcript_id "Novel_003870"; exon_number "2"; gene_type "  |
| scaffold:Cufflinks:exon | 84703   | 84792   | . | + | . | gene_id "XLOC_276502"; transcript_id "Novel_003871"; exon_number "1"; gene_type "  |
| scaffold:Cufflinks:exon | 85130   | 85335   | . | + | . | gene_id "XLOC_276502"; transcript_id "Novel_003871"; exon_number "2"; gene_type "  |
| scaffold:Cufflinks:exon | 1193268 | 1193424 | . | + | . | gene_id "XLOC_276674"; transcript_id "Novel_003872"; exon_number "1"; gene_type "  |
| scaffold:Cufflinks:exon | 1193560 | 1193630 | . | + | . | gene_id "XLOC_276674"; transcript_id "Novel_003872"; exon_number "2"; gene_type "  |
| scaffold:Cufflinks:exon | 1193722 | 1193846 | . | + | . | gene_id "XLOC_276674"; transcript_id "Novel_003872"; exon_number "3"; gene_type "  |
| scaffold:Cufflinks:exon | 1194063 | 1194115 | . | + | . | gene_id "XLOC_276674"; transcript_id "Novel_003872"; exon_number "4"; gene_type "  |
| scaffold:Cufflinks:exon | 1194383 | 1194495 | . | + | . | gene_id "XLOC_276674"; transcript_id "Novel_003872"; exon_number "5"; gene_type "  |
| scaffold:Cufflinks:exon | 1194706 | 1194815 | . | + | . | gene_id "XLOC_276674"; transcript_id "Novel_003872"; exon_number "6"; gene_type "  |
| scaffold:Cufflinks:exon | 1195125 | 1195234 | . | + | . | gene_id "XLOC_276674"; transcript_id "Novel_003872"; exon_number "7"; gene_type "  |
| scaffold:Cufflinks:exon | 1195320 | 1195926 | . | + | . | gene_id "XLOC_276674"; transcript_id "Novel_003872"; exon_number "8"; gene_type "  |
| scaffold:Cufflinks:exon | 1196048 | 1196175 | . | + | . | gene_id "XLOC_276674"; transcript_id "Novel_003872"; exon_number "9"; gene_type "  |
| scaffold:Cufflinks:exon | 1196327 | 1196663 | . | + | . | gene_id "XLOC_276674"; transcript_id "Novel_003872"; exon_number "10"; gene_type " |
| scaffold:Cufflinks:exon | 1196758 | 1197453 | . | + | . | gene_id "XLOC_276674"; transcript_id "Novel_003872"; exon_number "11"; gene_type " |
| scaffold:Cufflinks:exon | 776605  | 777673  | . | - | . | gene_id "XLOC_276763"; transcript_id "Novel_003873"; exon_number "1"; gene_type "  |
| scaffold:Cufflinks:exon | 777794  | 778153  | . | - | . | gene_id "XLOC_276763"; transcript_id "Novel_003873"; exon_number "2"; gene_type "  |
| scaffold:Cufflinks:exon | 778528  | 778705  | . | - | . | gene_id "XLOC_276763"; transcript_id "Novel_003873"; exon_number "3"; gene_type "  |
| scaffold:Cufflinks:exon | 776605  | 777673  | . | - | . | gene_id "XLOC_276763"; transcript_id "Novel_003874"; exon_number "1"; gene_type "  |
| scaffold:Cufflinks:exon | 777794  | 778887  | . | - | . | gene_id "XLOC_276763"; transcript_id "Novel_003874"; exon_number "2"; gene_type "  |
| scaffold:Cufflinks:exon | 776605  | 777673  | . | - | . | gene_id "XLOC_276763"; transcript_id "Novel_003875"; exon_number "1"; gene_type "  |
| scaffold:Cufflinks:exon | 777794  | 778157  | . | - | . | gene_id "XLOC_276763"; transcript_id "Novel_003875"; exon_number "2"; gene_type "  |
| scaffold:Cufflinks:exon | 778528  | 778887  | . | - | . | gene_id "XLOC_276763"; transcript_id "Novel_003875"; exon_number "3"; gene_type "  |
| scaffold:Cufflinks:exon | 8826    | 9321    | . | - | . | gene_id "XLOC_276859"; transcript_id "Novel_003876"; exon_number "1"; gene_type "  |

|                         |       |       |   |   |   |                                                                                   |
|-------------------------|-------|-------|---|---|---|-----------------------------------------------------------------------------------|
| scaffold:Cufflinks:exon | 10090 | 10452 | . | - | . | gene_id "XLOC_276859"; transcript_id "Novel_003876"; exon_number "2"; gene_type " |
| scaffold:Cufflinks:exon | 10894 | 10944 | . | - | . | gene_id "XLOC_276859"; transcript_id "Novel_003876"; exon_number "3"; gene_type " |
| scaffold:Cufflinks:exon | 11274 | 12596 | . | - | . | gene_id "XLOC_276859"; transcript_id "Novel_003876"; exon_number "4"; gene_type " |
| scaffold:Cufflinks:exon | 14456 | 14814 | . | + | . | gene_id "XLOC_277022"; transcript_id "Novel_003877"; exon_number "1"; gene_type " |
| scaffold:Cufflinks:exon | 15689 | 15867 | . | + | . | gene_id "XLOC_277022"; transcript_id "Novel_003877"; exon_number "2"; gene_type " |
| scaffold:Cufflinks:exon | 16083 | 16372 | . | + | . | gene_id "XLOC_277022"; transcript_id "Novel_003877"; exon_number "3"; gene_type " |
| scaffold:Cufflinks:exon | 14512 | 14814 | . | + | . | gene_id "XLOC_277022"; transcript_id "Novel_003878"; exon_number "1"; gene_type " |
| scaffold:Cufflinks:exon | 15689 | 15867 | . | + | . | gene_id "XLOC_277022"; transcript_id "Novel_003878"; exon_number "2"; gene_type " |
| scaffold:Cufflinks:exon | 16083 | 16266 | . | + | . | gene_id "XLOC_277022"; transcript_id "Novel_003878"; exon_number "3"; gene_type " |
| scaffold:Cufflinks:exon | 16477 | 16551 | . | + | . | gene_id "XLOC_277022"; transcript_id "Novel_003878"; exon_number "4"; gene_type " |
| scaffold:Cufflinks:exon | 16871 | 16980 | . | + | . | gene_id "XLOC_277022"; transcript_id "Novel_003878"; exon_number "5"; gene_type " |
| scaffold:Cufflinks:exon | 17306 | 17524 | . | + | . | gene_id "XLOC_277022"; transcript_id "Novel_003878"; exon_number "6"; gene_type " |
| scaffold:Cufflinks:exon | 17767 | 17922 | . | + | . | gene_id "XLOC_277022"; transcript_id "Novel_003878"; exon_number "7"; gene_type " |
| scaffold:Cufflinks:exon | 17995 | 18557 | . | + | . | gene_id "XLOC_277022"; transcript_id "Novel_003878"; exon_number "8"; gene_type " |
| scaffold:Cufflinks:exon | 20490 | 20502 | . | + | . | gene_id "XLOC_277024"; transcript_id "Novel_003879"; exon_number "1"; gene_type " |
| scaffold:Cufflinks:exon | 21267 | 21420 | . | + | . | gene_id "XLOC_277024"; transcript_id "Novel_003879"; exon_number "2"; gene_type " |
| scaffold:Cufflinks:exon | 21510 | 21578 | . | + | . | gene_id "XLOC_277024"; transcript_id "Novel_003879"; exon_number "3"; gene_type " |
| scaffold:Cufflinks:exon | 21890 | 21996 | . | + | . | gene_id "XLOC_277024"; transcript_id "Novel_003879"; exon_number "4"; gene_type " |
| scaffold:Cufflinks:exon | 22961 | 23865 | . | + | . | gene_id "XLOC_277024"; transcript_id "Novel_003879"; exon_number "5"; gene_type " |
| scaffold:Cufflinks:exon | 30734 | 31806 | . | - | . | gene_id "XLOC_277038"; transcript_id "Novel_003880"; exon_number "1"; gene_type " |
| scaffold:Cufflinks:exon | 32759 | 33189 | . | - | . | gene_id "XLOC_277038"; transcript_id "Novel_003880"; exon_number "2"; gene_type " |
| scaffold:Cufflinks:exon | 38096 | 39227 | . | - | . | gene_id "XLOC_277038"; transcript_id "Novel_003880"; exon_number "3"; gene_type " |
| scaffold:Cufflinks:exon | 39696 | 39904 | . | - | . | gene_id "XLOC_277038"; transcript_id "Novel_003880"; exon_number "4"; gene_type " |
| scaffold:Cufflinks:exon | 30830 | 31806 | . | - | . | gene_id "XLOC_277038"; transcript_id "Novel_003881"; exon_number "1"; gene_type " |
| scaffold:Cufflinks:exon | 32759 | 33189 | . | - | . | gene_id "XLOC_277038"; transcript_id "Novel_003881"; exon_number "2"; gene_type " |
| scaffold:Cufflinks:exon | 38096 | 39378 | . | - | . | gene_id "XLOC_277038"; transcript_id "Novel_003881"; exon_number "3"; gene_type " |
| scaffold:Cufflinks:exon | 81443 | 82017 | . | - | . | gene_id "XLOC_277054"; transcript_id "Novel_003882"; exon_number "1"; gene_type " |
| scaffold:Cufflinks:exon | 82102 | 82299 | . | - | . | gene_id "XLOC_277054"; transcript_id "Novel_003882"; exon_number "2"; gene_type " |
| scaffold:Cufflinks:exon | 82400 | 82679 | . | - | . | gene_id "XLOC_277054"; transcript_id "Novel_003882"; exon_number "3"; gene_type " |
| scaffold:Cufflinks:exon | 82776 | 84792 | . | - | . | gene_id "XLOC_277054"; transcript_id "Novel_003882"; exon_number "4"; gene_type " |
| scaffold:Cufflinks:exon | 85111 | 85372 | . | - | . | gene_id "XLOC_277054"; transcript_id "Novel_003882"; exon_number "5"; gene_type " |
| scaffold:Cufflinks:exon | 86745 | 88491 | . | - | . | gene_id "XLOC_277056"; transcript_id "Novel_003883"; exon_number "1"; gene_type " |
| scaffold:Cufflinks:exon | 88582 | 88923 | . | - | . | gene_id "XLOC_277056"; transcript_id "Novel_003883"; exon_number "2"; gene_type " |
| scaffold:Cufflinks:exon | 97850 | 98604 | . | + | . | gene_id "XLOC_277086"; transcript_id "Novel_003884"; exon_number "1"; gene_type " |
| scaffold:Cufflinks:exon | 98887 | 98946 | . | + | . | gene_id "XLOC_277086"; transcript_id "Novel_003884"; exon_number "2"; gene_type " |

|                         |         |         |   |   |   |         |                |               |                 |             |      |           |   |
|-------------------------|---------|---------|---|---|---|---------|----------------|---------------|-----------------|-------------|------|-----------|---|
| scaffold:Cufflinks:exon | 99026   | 99100   | . | + | . | gene_id | "XLOC_277086"; | transcript_id | "Novel_003884"; | exon_number | "3"; | gene_type | " |
| scaffold:Cufflinks:exon | 99618   | 99990   | . | + | . | gene_id | "XLOC_277086"; | transcript_id | "Novel_003884"; | exon_number | "4"; | gene_type | " |
| scaffold:Cufflinks:exon | 1068958 | 1069124 | . | + | . | gene_id | "XLOC_277237"; | transcript_id | "Novel_003885"; | exon_number | "1"; | gene_type | " |
| scaffold:Cufflinks:exon | 1069401 | 1069477 | . | + | . | gene_id | "XLOC_277237"; | transcript_id | "Novel_003885"; | exon_number | "2"; | gene_type | " |
| scaffold:Cufflinks:exon | 1069592 | 1069661 | . | + | . | gene_id | "XLOC_277237"; | transcript_id | "Novel_003885"; | exon_number | "3"; | gene_type | " |
| scaffold:Cufflinks:exon | 1070242 | 1070351 | . | + | . | gene_id | "XLOC_277237"; | transcript_id | "Novel_003885"; | exon_number | "4"; | gene_type | " |
| scaffold:Cufflinks:exon | 1071241 | 1071355 | . | + | . | gene_id | "XLOC_277237"; | transcript_id | "Novel_003885"; | exon_number | "5"; | gene_type | " |
| scaffold:Cufflinks:exon | 1071499 | 1071623 | . | + | . | gene_id | "XLOC_277237"; | transcript_id | "Novel_003885"; | exon_number | "6"; | gene_type | " |
| scaffold:Cufflinks:exon | 1071689 | 1072181 | . | + | . | gene_id | "XLOC_277237"; | transcript_id | "Novel_003885"; | exon_number | "7"; | gene_type | " |
| scaffold:Cufflinks:exon | 1068968 | 1069124 | . | + | . | gene_id | "XLOC_277237"; | transcript_id | "Novel_003886"; | exon_number | "1"; | gene_type | " |
| scaffold:Cufflinks:exon | 1069401 | 1069477 | . | + | . | gene_id | "XLOC_277237"; | transcript_id | "Novel_003886"; | exon_number | "2"; | gene_type | " |
| scaffold:Cufflinks:exon | 1069592 | 1069661 | . | + | . | gene_id | "XLOC_277237"; | transcript_id | "Novel_003886"; | exon_number | "3"; | gene_type | " |
| scaffold:Cufflinks:exon | 1070242 | 1070351 | . | + | . | gene_id | "XLOC_277237"; | transcript_id | "Novel_003886"; | exon_number | "4"; | gene_type | " |
| scaffold:Cufflinks:exon | 1071215 | 1071355 | . | + | . | gene_id | "XLOC_277237"; | transcript_id | "Novel_003886"; | exon_number | "5"; | gene_type | " |
| scaffold:Cufflinks:exon | 1071499 | 1072528 | . | + | . | gene_id | "XLOC_277237"; | transcript_id | "Novel_003886"; | exon_number | "6"; | gene_type | " |
| scaffold:Cufflinks:exon | 1068976 | 1069124 | . | + | . | gene_id | "XLOC_277237"; | transcript_id | "Novel_003887"; | exon_number | "1"; | gene_type | " |
| scaffold:Cufflinks:exon | 1069401 | 1069477 | . | + | . | gene_id | "XLOC_277237"; | transcript_id | "Novel_003887"; | exon_number | "2"; | gene_type | " |
| scaffold:Cufflinks:exon | 1069592 | 1069661 | . | + | . | gene_id | "XLOC_277237"; | transcript_id | "Novel_003887"; | exon_number | "3"; | gene_type | " |
| scaffold:Cufflinks:exon | 1070242 | 1070351 | . | + | . | gene_id | "XLOC_277237"; | transcript_id | "Novel_003887"; | exon_number | "4"; | gene_type | " |
| scaffold:Cufflinks:exon | 1071241 | 1071355 | . | + | . | gene_id | "XLOC_277237"; | transcript_id | "Novel_003887"; | exon_number | "5"; | gene_type | " |
| scaffold:Cufflinks:exon | 1071499 | 1072528 | . | + | . | gene_id | "XLOC_277237"; | transcript_id | "Novel_003887"; | exon_number | "6"; | gene_type | " |
| scaffold:Cufflinks:exon | 1069288 | 1069477 | . | + | . | gene_id | "XLOC_277237"; | transcript_id | "Novel_003888"; | exon_number | "1"; | gene_type | " |
| scaffold:Cufflinks:exon | 1069592 | 1069661 | . | + | . | gene_id | "XLOC_277237"; | transcript_id | "Novel_003888"; | exon_number | "2"; | gene_type | " |
| scaffold:Cufflinks:exon | 1070242 | 1071092 | . | + | . | gene_id | "XLOC_277237"; | transcript_id | "Novel_003888"; | exon_number | "3"; | gene_type | " |
| scaffold:Cufflinks:exon | 26630   | 26945   | . | - | . | gene_id | "XLOC_277468"; | transcript_id | "Novel_003889"; | exon_number | "1"; | gene_type | " |
| scaffold:Cufflinks:exon | 27039   | 27139   | . | - | . | gene_id | "XLOC_277468"; | transcript_id | "Novel_003889"; | exon_number | "2"; | gene_type | " |
| scaffold:Cufflinks:exon | 27296   | 27349   | . | - | . | gene_id | "XLOC_277468"; | transcript_id | "Novel_003889"; | exon_number | "3"; | gene_type | " |
| scaffold:Cufflinks:exon | 28942   | 28999   | . | - | . | gene_id | "XLOC_277468"; | transcript_id | "Novel_003889"; | exon_number | "4"; | gene_type | " |
| scaffold:Cufflinks:exon | 29174   | 30074   | . | - | . | gene_id | "XLOC_277468"; | transcript_id | "Novel_003889"; | exon_number | "5"; | gene_type | " |
| scaffold:Cufflinks:exon | 75818   | 76308   | . | + | . | gene_id | "XLOC_277550"; | transcript_id | "Novel_003890"; | exon_number | "1"; | gene_type | " |
| scaffold:Cufflinks:exon | 76398   | 76726   | . | + | . | gene_id | "XLOC_277550"; | transcript_id | "Novel_003890"; | exon_number | "2"; | gene_type | " |
| scaffold:Cufflinks:exon | 112174  | 112304  | . | + | . | gene_id | "XLOC_277558"; | transcript_id | "Novel_003891"; | exon_number | "1"; | gene_type | " |
| scaffold:Cufflinks:exon | 113337  | 113454  | . | + | . | gene_id | "XLOC_277558"; | transcript_id | "Novel_003891"; | exon_number | "2"; | gene_type | " |
| scaffold:Cufflinks:exon | 114476  | 114515  | . | + | . | gene_id | "XLOC_277558"; | transcript_id | "Novel_003891"; | exon_number | "3"; | gene_type | " |
| scaffold:Cufflinks:exon | 114668  | 114763  | . | + | . | gene_id | "XLOC_277558"; | transcript_id | "Novel_003891"; | exon_number | "4"; | gene_type | " |



|                         |        |        |   |   |   |                                                                                   |
|-------------------------|--------|--------|---|---|---|-----------------------------------------------------------------------------------|
| scaffold:Cufflinks:exon | 24805  | 27055  | . | - | . | gene_id "XLOC_278059"; transcript_id "Novel_003899"; exon_number "1"; gene_type " |
| scaffold:Cufflinks:exon | 27135  | 27643  | . | - | . | gene_id "XLOC_278059"; transcript_id "Novel_003899"; exon_number "2"; gene_type " |
| scaffold:Cufflinks:exon | 24805  | 27482  | . | - | . | gene_id "XLOC_278059"; transcript_id "Novel_003900"; exon_number "1"; gene_type " |
| scaffold:Cufflinks:exon | 28471  | 28701  | . | - | . | gene_id "XLOC_278059"; transcript_id "Novel_003900"; exon_number "2"; gene_type " |
| scaffold:Cufflinks:exon | 34949  | 35048  | . | + | . | gene_id "XLOC_278268"; transcript_id "Novel_003901"; exon_number "1"; gene_type " |
| scaffold:Cufflinks:exon | 35182  | 37826  | . | + | . | gene_id "XLOC_278268"; transcript_id "Novel_003901"; exon_number "2"; gene_type " |
| scaffold:Cufflinks:exon | 99933  | 100290 | . | - | . | gene_id "XLOC_278363"; transcript_id "Novel_003902"; exon_number "1"; gene_type " |
| scaffold:Cufflinks:exon | 48147  | 48629  | . | + | . | gene_id "XLOC_278375"; transcript_id "Novel_003903"; exon_number "1"; gene_type " |
| scaffold:Cufflinks:exon | 48725  | 49643  | . | + | . | gene_id "XLOC_278375"; transcript_id "Novel_003903"; exon_number "2"; gene_type " |
| scaffold:Cufflinks:exon | 48147  | 48424  | . | + | . | gene_id "XLOC_278375"; transcript_id "Novel_003904"; exon_number "1"; gene_type " |
| scaffold:Cufflinks:exon | 48500  | 48629  | . | + | . | gene_id "XLOC_278375"; transcript_id "Novel_003904"; exon_number "2"; gene_type " |
| scaffold:Cufflinks:exon | 48725  | 49643  | . | + | . | gene_id "XLOC_278375"; transcript_id "Novel_003904"; exon_number "3"; gene_type " |
| scaffold:Cufflinks:exon | 17562  | 19059  | . | - | . | gene_id "XLOC_278379"; transcript_id "Novel_003905"; exon_number "1"; gene_type " |
| scaffold:Cufflinks:exon | 19235  | 19329  | . | - | . | gene_id "XLOC_278379"; transcript_id "Novel_003905"; exon_number "2"; gene_type " |
| scaffold:Cufflinks:exon | 79421  | 79650  | . | + | . | gene_id "XLOC_278495"; transcript_id "Novel_003906"; exon_number "1"; gene_type " |
| scaffold:Cufflinks:exon | 97985  | 98222  | . | + | . | gene_id "XLOC_278522"; transcript_id "Novel_003907"; exon_number "1"; gene_type " |
| scaffold:Cufflinks:exon | 98778  | 98844  | . | + | . | gene_id "XLOC_278522"; transcript_id "Novel_003907"; exon_number "2"; gene_type " |
| scaffold:Cufflinks:exon | 99838  | 99897  | . | + | . | gene_id "XLOC_278522"; transcript_id "Novel_003907"; exon_number "3"; gene_type " |
| scaffold:Cufflinks:exon | 100499 | 100566 | . | + | . | gene_id "XLOC_278522"; transcript_id "Novel_003907"; exon_number "4"; gene_type " |
| scaffold:Cufflinks:exon | 101697 | 102142 | . | + | . | gene_id "XLOC_278522"; transcript_id "Novel_003907"; exon_number "5"; gene_type " |
| scaffold:Cufflinks:exon | 97985  | 98222  | . | + | . | gene_id "XLOC_278522"; transcript_id "Novel_003908"; exon_number "1"; gene_type " |
| scaffold:Cufflinks:exon | 98778  | 98844  | . | + | . | gene_id "XLOC_278522"; transcript_id "Novel_003908"; exon_number "2"; gene_type " |
| scaffold:Cufflinks:exon | 99838  | 102142 | . | + | . | gene_id "XLOC_278522"; transcript_id "Novel_003908"; exon_number "3"; gene_type " |
| scaffold:Cufflinks:exon | 4342   | 5672   | . | - | . | gene_id "XLOC_278589"; transcript_id "Novel_003909"; exon_number "1"; gene_type " |
| scaffold:Cufflinks:exon | 29818  | 29898  | . | - | . | gene_id "XLOC_278589"; transcript_id "Novel_003909"; exon_number "2"; gene_type " |
| scaffold:Cufflinks:exon | 772230 | 773682 | . | + | . | gene_id "XLOC_279353"; transcript_id "Novel_003910"; exon_number "1"; gene_type " |
| scaffold:Cufflinks:exon | 774145 | 774271 | . | + | . | gene_id "XLOC_279353"; transcript_id "Novel_003910"; exon_number "2"; gene_type " |
| scaffold:Cufflinks:exon | 849359 | 849416 | . | + | . | gene_id "XLOC_279368"; transcript_id "Novel_003911"; exon_number "1"; gene_type " |
| scaffold:Cufflinks:exon | 849510 | 849604 | . | + | . | gene_id "XLOC_279368"; transcript_id "Novel_003911"; exon_number "2"; gene_type " |
| scaffold:Cufflinks:exon | 849707 | 850978 | . | + | . | gene_id "XLOC_279368"; transcript_id "Novel_003911"; exon_number "3"; gene_type " |
| scaffold:Cufflinks:exon | 276650 | 277018 | . | - | . | gene_id "XLOC_279452"; transcript_id "Novel_003912"; exon_number "1"; gene_type " |
| scaffold:Cufflinks:exon | 571379 | 572199 | . | - | . | gene_id "XLOC_279502"; transcript_id "Novel_003913"; exon_number "1"; gene_type " |
| scaffold:Cufflinks:exon | 572390 | 574021 | . | - | . | gene_id "XLOC_279502"; transcript_id "Novel_003913"; exon_number "2"; gene_type " |
| scaffold:Cufflinks:exon | 574163 | 574322 | . | - | . | gene_id "XLOC_279502"; transcript_id "Novel_003913"; exon_number "3"; gene_type " |
| scaffold:Cufflinks:exon | 571379 | 572199 | . | - | . | gene_id "XLOC_279502"; transcript_id "Novel_003914"; exon_number "1"; gene_type " |

|                         |        |        |   |   |                                                                                   |
|-------------------------|--------|--------|---|---|-----------------------------------------------------------------------------------|
| scaffold:Cufflinks:exon | 572390 | 574021 | . | . | gene_id "XLOC_279502"; transcript_id "Novel_003914"; exon_number "2"; gene_type " |
| scaffold:Cufflinks:exon | 574163 | 574203 | . | . | gene_id "XLOC_279502"; transcript_id "Novel_003914"; exon_number "3"; gene_type " |
| scaffold:Cufflinks:exon | 574692 | 574817 | . | . | gene_id "XLOC_279502"; transcript_id "Novel_003914"; exon_number "4"; gene_type " |
| scaffold:Cufflinks:exon | 571449 | 572199 | . | . | gene_id "XLOC_279502"; transcript_id "Novel_003915"; exon_number "1"; gene_type " |
| scaffold:Cufflinks:exon | 572390 | 574021 | . | . | gene_id "XLOC_279502"; transcript_id "Novel_003915"; exon_number "2"; gene_type " |
| scaffold:Cufflinks:exon | 574163 | 574203 | . | . | gene_id "XLOC_279502"; transcript_id "Novel_003915"; exon_number "3"; gene_type " |
| scaffold:Cufflinks:exon | 574486 | 574540 | . | . | gene_id "XLOC_279502"; transcript_id "Novel_003915"; exon_number "4"; gene_type " |
| scaffold:Cufflinks:exon | 572317 | 574021 | . | . | gene_id "XLOC_279502"; transcript_id "Novel_003916"; exon_number "1"; gene_type " |
| scaffold:Cufflinks:exon | 574163 | 574203 | . | . | gene_id "XLOC_279502"; transcript_id "Novel_003916"; exon_number "2"; gene_type " |
| scaffold:Cufflinks:exon | 574692 | 574839 | . | . | gene_id "XLOC_279502"; transcript_id "Novel_003916"; exon_number "3"; gene_type " |
| scaffold:Cufflinks:exon | 35382  | 37066  | . | . | gene_id "XLOC_279609"; transcript_id "Novel_003917"; exon_number "1"; gene_type " |
| scaffold:Cufflinks:exon | 37517  | 37673  | . | . | gene_id "XLOC_279609"; transcript_id "Novel_003917"; exon_number "2"; gene_type " |
| scaffold:Cufflinks:exon | 20204  | 20466  | . | . | gene_id "XLOC_279736"; transcript_id "Novel_003918"; exon_number "1"; gene_type " |
| scaffold:Cufflinks:exon | 21396  | 21686  | . | . | gene_id "XLOC_279736"; transcript_id "Novel_003918"; exon_number "2"; gene_type " |
| scaffold:Cufflinks:exon | 22583  | 22705  | . | . | gene_id "XLOC_279736"; transcript_id "Novel_003918"; exon_number "3"; gene_type " |
| scaffold:Cufflinks:exon | 22879  | 23489  | . | . | gene_id "XLOC_279736"; transcript_id "Novel_003918"; exon_number "4"; gene_type " |
| scaffold:Cufflinks:exon | 15672  | 15886  | . | . | gene_id "XLOC_279800"; transcript_id "Novel_003919"; exon_number "1"; gene_type " |
| scaffold:Cufflinks:exon | 749    | 1009   | . | . | gene_id "XLOC_279826"; transcript_id "Novel_003920"; exon_number "1"; gene_type " |
| scaffold:Cufflinks:exon | 1371   | 1431   | . | . | gene_id "XLOC_279826"; transcript_id "Novel_003920"; exon_number "2"; gene_type " |
| scaffold:Cufflinks:exon | 3591   | 3740   | . | . | gene_id "XLOC_279826"; transcript_id "Novel_003920"; exon_number "3"; gene_type " |
| scaffold:Cufflinks:exon | 3827   | 3931   | . | . | gene_id "XLOC_279826"; transcript_id "Novel_003920"; exon_number "4"; gene_type " |
| scaffold:Cufflinks:exon | 4033   | 4476   | . | . | gene_id "XLOC_279826"; transcript_id "Novel_003920"; exon_number "5"; gene_type " |
| scaffold:Cufflinks:exon | 761    | 3740   | . | . | gene_id "XLOC_279826"; transcript_id "Novel_003921"; exon_number "1"; gene_type " |
| scaffold:Cufflinks:exon | 3827   | 3931   | . | . | gene_id "XLOC_279826"; transcript_id "Novel_003921"; exon_number "2"; gene_type " |
| scaffold:Cufflinks:exon | 4033   | 4454   | . | . | gene_id "XLOC_279826"; transcript_id "Novel_003921"; exon_number "3"; gene_type " |
| scaffold:Cufflinks:exon | 761    | 1009   | . | . | gene_id "XLOC_279826"; transcript_id "Novel_003922"; exon_number "1"; gene_type " |
| scaffold:Cufflinks:exon | 1371   | 1431   | . | . | gene_id "XLOC_279826"; transcript_id "Novel_003922"; exon_number "2"; gene_type " |
| scaffold:Cufflinks:exon | 3591   | 3740   | . | . | gene_id "XLOC_279826"; transcript_id "Novel_003922"; exon_number "3"; gene_type " |
| scaffold:Cufflinks:exon | 3827   | 3931   | . | . | gene_id "XLOC_279826"; transcript_id "Novel_003922"; exon_number "4"; gene_type " |
| scaffold:Cufflinks:exon | 4033   | 4325   | . | . | gene_id "XLOC_279826"; transcript_id "Novel_003922"; exon_number "5"; gene_type " |
| scaffold:Cufflinks:exon | 4611   | 4880   | . | . | gene_id "XLOC_279826"; transcript_id "Novel_003922"; exon_number "6"; gene_type " |
| scaffold:Cufflinks:exon | 34158  | 34273  | + | . | gene_id "XLOC_279845"; transcript_id "Novel_003923"; exon_number "1"; gene_type " |
| scaffold:Cufflinks:exon | 41588  | 41801  | + | . | gene_id "XLOC_279845"; transcript_id "Novel_003923"; exon_number "2"; gene_type " |
| scaffold:Cufflinks:exon | 34710  | 34862  | + | . | gene_id "XLOC_279846"; transcript_id "Novel_003924"; exon_number "1"; gene_type " |
| scaffold:Cufflinks:exon | 79934  | 79994  | + | . | gene_id "XLOC_279846"; transcript_id "Novel_003924"; exon_number "2"; gene_type " |

|                         |         |         |   |   |   |                                                                                   |
|-------------------------|---------|---------|---|---|---|-----------------------------------------------------------------------------------|
| scaffold:Cufflinks:exon | 52245   | 52954   | . | + | . | gene_id "XLOC_279852"; transcript_id "Novel_003925"; exon_number "1"; gene_type " |
| scaffold:Cufflinks:exon | 53096   | 53636   | . | + | . | gene_id "XLOC_279852"; transcript_id "Novel_003925"; exon_number "2"; gene_type " |
| scaffold:Cufflinks:exon | 51919   | 52021   | . | + | . | gene_id "XLOC_279854"; transcript_id "Novel_003926"; exon_number "1"; gene_type " |
| scaffold:Cufflinks:exon | 60160   | 60261   | . | + | . | gene_id "XLOC_279854"; transcript_id "Novel_003926"; exon_number "2"; gene_type " |
| scaffold:Cufflinks:exon | 16340   | 16867   | . | - | . | gene_id "XLOC_279970"; transcript_id "Novel_003927"; exon_number "1"; gene_type " |
| scaffold:Cufflinks:exon | 18168   | 18471   | . | - | . | gene_id "XLOC_279970"; transcript_id "Novel_003927"; exon_number "2"; gene_type " |
| scaffold:Cufflinks:exon | 16340   | 16864   | . | - | . | gene_id "XLOC_279970"; transcript_id "Novel_003928"; exon_number "1"; gene_type " |
| scaffold:Cufflinks:exon | 18168   | 18471   | . | - | . | gene_id "XLOC_279970"; transcript_id "Novel_003928"; exon_number "2"; gene_type " |
| scaffold:Cufflinks:exon | 1587914 | 1588418 | . | + | . | gene_id "XLOC_280382"; transcript_id "Novel_003929"; exon_number "1"; gene_type " |
| scaffold:Cufflinks:exon | 1588521 | 1588588 | . | + | . | gene_id "XLOC_280382"; transcript_id "Novel_003929"; exon_number "2"; gene_type " |
| scaffold:Cufflinks:exon | 1597183 | 1600519 | . | + | . | gene_id "XLOC_280382"; transcript_id "Novel_003929"; exon_number "3"; gene_type " |
| scaffold:Cufflinks:exon | 1683064 | 1683340 | . | - | . | gene_id "XLOC_280685"; transcript_id "Novel_003930"; exon_number "1"; gene_type " |
| scaffold:Cufflinks:exon | 1683568 | 1683623 | . | - | . | gene_id "XLOC_280685"; transcript_id "Novel_003930"; exon_number "2"; gene_type " |
| scaffold:Cufflinks:exon | 1683705 | 1684079 | . | - | . | gene_id "XLOC_280685"; transcript_id "Novel_003930"; exon_number "3"; gene_type " |
| scaffold:Cufflinks:exon | 1684565 | 1684606 | . | - | . | gene_id "XLOC_280685"; transcript_id "Novel_003930"; exon_number "4"; gene_type " |
| scaffold:Cufflinks:exon | 1684811 | 1686440 | . | - | . | gene_id "XLOC_280685"; transcript_id "Novel_003930"; exon_number "5"; gene_type " |
| scaffold:Cufflinks:exon | 1683064 | 1683340 | . | - | . | gene_id "XLOC_280685"; transcript_id "Novel_003931"; exon_number "1"; gene_type " |
| scaffold:Cufflinks:exon | 1683568 | 1683623 | . | - | . | gene_id "XLOC_280685"; transcript_id "Novel_003931"; exon_number "2"; gene_type " |
| scaffold:Cufflinks:exon | 1683705 | 1684079 | . | - | . | gene_id "XLOC_280685"; transcript_id "Novel_003931"; exon_number "3"; gene_type " |
| scaffold:Cufflinks:exon | 1684565 | 1684606 | . | - | . | gene_id "XLOC_280685"; transcript_id "Novel_003931"; exon_number "4"; gene_type " |
| scaffold:Cufflinks:exon | 1684811 | 1684850 | . | - | . | gene_id "XLOC_280685"; transcript_id "Novel_003931"; exon_number "5"; gene_type " |
| scaffold:Cufflinks:exon | 1685072 | 1686440 | . | - | . | gene_id "XLOC_280685"; transcript_id "Novel_003931"; exon_number "6"; gene_type " |
| scaffold:Cufflinks:exon | 1909606 | 1909647 | . | - | . | gene_id "XLOC_280717"; transcript_id "Novel_003932"; exon_number "1"; gene_type " |
| scaffold:Cufflinks:exon | 1910116 | 1910183 | . | - | . | gene_id "XLOC_280717"; transcript_id "Novel_003932"; exon_number "2"; gene_type " |
| scaffold:Cufflinks:exon | 1910484 | 1910609 | . | - | . | gene_id "XLOC_280717"; transcript_id "Novel_003932"; exon_number "3"; gene_type " |
| scaffold:Cufflinks:exon | 48414   | 49148   | . | + | . | gene_id "XLOC_280886"; transcript_id "Novel_003933"; exon_number "1"; gene_type " |
| scaffold:Cufflinks:exon | 72394   | 73085   | . | + | . | gene_id "XLOC_280886"; transcript_id "Novel_003933"; exon_number "2"; gene_type " |
| scaffold:Cufflinks:exon | 52268   | 52677   | . | + | . | gene_id "XLOC_280888"; transcript_id "Novel_003934"; exon_number "1"; gene_type " |
| scaffold:Cufflinks:exon | 52768   | 52788   | . | + | . | gene_id "XLOC_280888"; transcript_id "Novel_003934"; exon_number "2"; gene_type " |
| scaffold:Cufflinks:exon | 91619   | 92213   | . | + | . | gene_id "XLOC_280956"; transcript_id "Novel_003935"; exon_number "1"; gene_type " |
| scaffold:Cufflinks:exon | 92939   | 93312   | . | + | . | gene_id "XLOC_280956"; transcript_id "Novel_003935"; exon_number "2"; gene_type " |
| scaffold:Cufflinks:exon | 92523   | 93148   | . | + | . | gene_id "XLOC_280956"; transcript_id "Novel_003936"; exon_number "1"; gene_type " |
| scaffold:Cufflinks:exon | 93315   | 93355   | . | + | . | gene_id "XLOC_280956"; transcript_id "Novel_003936"; exon_number "2"; gene_type " |
| scaffold:Cufflinks:exon | 4598    | 4796    | . | + | . | gene_id "XLOC_281107"; transcript_id "Novel_003937"; exon_number "1"; gene_type " |
| scaffold:Cufflinks:exon | 5323    | 5507    | . | + | . | gene_id "XLOC_281107"; transcript_id "Novel_003937"; exon_number "2"; gene_type " |

|                    |      |       |       |   |   |   |         |                              |                             |                |   |
|--------------------|------|-------|-------|---|---|---|---------|------------------------------|-----------------------------|----------------|---|
| scaffold3Cufflinks | exon | 34364 | 35120 | . | + | . | gene_id | "XLOC_281302"; transcript_id | "Novel_003938"; exon_number | "1"; gene_type | " |
| scaffold3Cufflinks | exon | 35893 | 36033 | . | + | . | gene_id | "XLOC_281302"; transcript_id | "Novel_003938"; exon_number | "2"; gene_type | " |
| scaffold3Cufflinks | exon | 36506 | 36649 | . | + | . | gene_id | "XLOC_281302"; transcript_id | "Novel_003938"; exon_number | "3"; gene_type | " |
| scaffold3Cufflinks | exon | 37574 | 37624 | . | + | . | gene_id | "XLOC_281302"; transcript_id | "Novel_003938"; exon_number | "4"; gene_type | " |
| scaffold3Cufflinks | exon | 38150 | 38562 | . | + | . | gene_id | "XLOC_281302"; transcript_id | "Novel_003938"; exon_number | "5"; gene_type | " |
| scaffold3Cufflinks | exon | 66489 | 66974 | . | - | . | gene_id | "XLOC_281389"; transcript_id | "Novel_003939"; exon_number | "1"; gene_type | " |
| scaffold3Cufflinks | exon | 67074 | 67855 | . | - | . | gene_id | "XLOC_281389"; transcript_id | "Novel_003939"; exon_number | "2"; gene_type | " |
| scaffold3Cufflinks | exon | 79772 | 79951 | . | + | . | gene_id | "XLOC_281438"; transcript_id | "Novel_003940"; exon_number | "1"; gene_type | " |
| scaffold3Cufflinks | exon | 80177 | 80227 | . | + | . | gene_id | "XLOC_281438"; transcript_id | "Novel_003940"; exon_number | "2"; gene_type | " |
| scaffold3Cufflinks | exon | 79787 | 79944 | . | + | . | gene_id | "XLOC_281438"; transcript_id | "Novel_003941"; exon_number | "1"; gene_type | " |
| scaffold3Cufflinks | exon | 80177 | 80300 | . | + | . | gene_id | "XLOC_281438"; transcript_id | "Novel_003941"; exon_number | "2"; gene_type | " |
| scaffold3Cufflinks | exon | 83077 | 83133 | . | + | . | gene_id | "XLOC_281442"; transcript_id | "Novel_003942"; exon_number | "1"; gene_type | " |
| scaffold3Cufflinks | exon | 83472 | 83821 | . | + | . | gene_id | "XLOC_281442"; transcript_id | "Novel_003942"; exon_number | "2"; gene_type | " |
| scaffold4Cufflinks | exon | 23541 | 24126 | . | - | . | gene_id | "XLOC_281513"; transcript_id | "Novel_003943"; exon_number | "1"; gene_type | " |
| scaffold4Cufflinks | exon | 24214 | 24295 | . | - | . | gene_id | "XLOC_281513"; transcript_id | "Novel_003943"; exon_number | "2"; gene_type | " |
| scaffold4Cufflinks | exon | 24389 | 24643 | . | - | . | gene_id | "XLOC_281513"; transcript_id | "Novel_003943"; exon_number | "3"; gene_type | " |
| scaffold4Cufflinks | exon | 25681 | 25830 | . | - | . | gene_id | "XLOC_281513"; transcript_id | "Novel_003943"; exon_number | "4"; gene_type | " |
| scaffold4Cufflinks | exon | 26943 | 27086 | . | - | . | gene_id | "XLOC_281513"; transcript_id | "Novel_003943"; exon_number | "5"; gene_type | " |
| scaffold4Cufflinks | exon | 28338 | 28492 | . | - | . | gene_id | "XLOC_281513"; transcript_id | "Novel_003943"; exon_number | "6"; gene_type | " |
| scaffold4Cufflinks | exon | 28741 | 28802 | . | - | . | gene_id | "XLOC_281513"; transcript_id | "Novel_003943"; exon_number | "7"; gene_type | " |
| scaffold4Cufflinks | exon | 28892 | 29020 | . | - | . | gene_id | "XLOC_281513"; transcript_id | "Novel_003943"; exon_number | "8"; gene_type | " |
| scaffold4Cufflinks | exon | 29262 | 29637 | . | - | . | gene_id | "XLOC_281513"; transcript_id | "Novel_003943"; exon_number | "9"; gene_type | " |
| scaffold4Cufflinks | exon | 17132 | 17594 | . | + | . | gene_id | "XLOC_281605"; transcript_id | "Novel_003944"; exon_number | "1"; gene_type | " |
| scaffold4Cufflinks | exon | 17678 | 17767 | . | + | . | gene_id | "XLOC_281605"; transcript_id | "Novel_003944"; exon_number | "2"; gene_type | " |
| scaffold4Cufflinks | exon | 17850 | 18210 | . | + | . | gene_id | "XLOC_281605"; transcript_id | "Novel_003944"; exon_number | "3"; gene_type | " |
| scaffold4Cufflinks | exon | 17639 | 17767 | . | + | . | gene_id | "XLOC_281605"; transcript_id | "Novel_003945"; exon_number | "1"; gene_type | " |
| scaffold4Cufflinks | exon | 17850 | 18347 | . | + | . | gene_id | "XLOC_281605"; transcript_id | "Novel_003945"; exon_number | "2"; gene_type | " |
| scaffold4Cufflinks | exon | 60115 | 60236 | . | - | . | gene_id | "XLOC_281629"; transcript_id | "Novel_003946"; exon_number | "1"; gene_type | " |
| scaffold4Cufflinks | exon | 60521 | 60669 | . | - | . | gene_id | "XLOC_281629"; transcript_id | "Novel_003946"; exon_number | "2"; gene_type | " |
| scaffold4Cufflinks | exon | 60638 | 60710 | . | - | . | gene_id | "XLOC_281629"; transcript_id | "Novel_003947"; exon_number | "1"; gene_type | " |
| scaffold4Cufflinks | exon | 60845 | 61014 | . | - | . | gene_id | "XLOC_281629"; transcript_id | "Novel_003947"; exon_number | "2"; gene_type | " |
| scaffold4Cufflinks | exon | 13809 | 21024 | . | - | . | gene_id | "XLOC_281698"; transcript_id | "Novel_003948"; exon_number | "1"; gene_type | " |
| scaffold4Cufflinks | exon | 21123 | 21516 | . | - | . | gene_id | "XLOC_281698"; transcript_id | "Novel_003948"; exon_number | "2"; gene_type | " |
| scaffold4Cufflinks | exon | 21628 | 21950 | . | - | . | gene_id | "XLOC_281698"; transcript_id | "Novel_003948"; exon_number | "3"; gene_type | " |
| scaffold4Cufflinks | exon | 14849 | 21024 | . | - | . | gene_id | "XLOC_281698"; transcript_id | "Novel_003949"; exon_number | "1"; gene_type | " |



|                    |      |       |       |   |   |   |         |                              |                             |                |   |
|--------------------|------|-------|-------|---|---|---|---------|------------------------------|-----------------------------|----------------|---|
| scaffold4Cufflinks | exon | 21123 | 21201 | . | - | . | gene_id | "XLOC_281698"; transcript_id | "Novel_003949"; exon_number | "2"; gene_type | " |
| scaffold4Cufflinks | exon | 21296 | 21516 | . | - | . | gene_id | "XLOC_281698"; transcript_id | "Novel_003949"; exon_number | "3"; gene_type | " |
| scaffold4Cufflinks | exon | 21628 | 21936 | . | - | . | gene_id | "XLOC_281698"; transcript_id | "Novel_003949"; exon_number | "4"; gene_type | " |
| scaffold4Cufflinks | exon | 14864 | 20806 | . | - | . | gene_id | "XLOC_281698"; transcript_id | "Novel_003950"; exon_number | "1"; gene_type | " |
| scaffold4Cufflinks | exon | 20943 | 21024 | . | - | . | gene_id | "XLOC_281698"; transcript_id | "Novel_003950"; exon_number | "2"; gene_type | " |
| scaffold4Cufflinks | exon | 21123 | 21516 | . | - | . | gene_id | "XLOC_281698"; transcript_id | "Novel_003950"; exon_number | "3"; gene_type | " |
| scaffold4Cufflinks | exon | 21628 | 22063 | . | - | . | gene_id | "XLOC_281698"; transcript_id | "Novel_003950"; exon_number | "4"; gene_type | " |
| scaffold4Cufflinks | exon | 28944 | 29173 | . | + | . | gene_id | "XLOC_281735"; transcript_id | "Novel_003951"; exon_number | "1"; gene_type | " |
| scaffold4Cufflinks | exon | 29251 | 29716 | . | + | . | gene_id | "XLOC_281735"; transcript_id | "Novel_003951"; exon_number | "2"; gene_type | " |
| scaffold4Cufflinks | exon | 74623 | 75181 | . | + | . | gene_id | "XLOC_281741"; transcript_id | "Novel_003952"; exon_number | "1"; gene_type | " |
| scaffold4Cufflinks | exon | 75530 | 75630 | . | + | . | gene_id | "XLOC_281741"; transcript_id | "Novel_003952"; exon_number | "2"; gene_type | " |
| scaffold4Cufflinks | exon | 75721 | 75856 | . | + | . | gene_id | "XLOC_281741"; transcript_id | "Novel_003952"; exon_number | "3"; gene_type | " |
| scaffold4Cufflinks | exon | 75962 | 76043 | . | + | . | gene_id | "XLOC_281741"; transcript_id | "Novel_003952"; exon_number | "4"; gene_type | " |
| scaffold4Cufflinks | exon | 76155 | 76348 | . | + | . | gene_id | "XLOC_281741"; transcript_id | "Novel_003952"; exon_number | "5"; gene_type | " |
| scaffold4Cufflinks | exon | 76425 | 76536 | . | + | . | gene_id | "XLOC_281741"; transcript_id | "Novel_003952"; exon_number | "6"; gene_type | " |
| scaffold4Cufflinks | exon | 76740 | 76844 | . | + | . | gene_id | "XLOC_281741"; transcript_id | "Novel_003952"; exon_number | "7"; gene_type | " |
| scaffold4Cufflinks | exon | 76927 | 77235 | . | + | . | gene_id | "XLOC_281741"; transcript_id | "Novel_003952"; exon_number | "8"; gene_type | " |
| scaffold4Cufflinks | exon | 74979 | 75181 | . | + | . | gene_id | "XLOC_281741"; transcript_id | "Novel_003953"; exon_number | "1"; gene_type | " |
| scaffold4Cufflinks | exon | 75530 | 75856 | . | + | . | gene_id | "XLOC_281741"; transcript_id | "Novel_003953"; exon_number | "2"; gene_type | " |
| scaffold4Cufflinks | exon | 75962 | 76043 | . | + | . | gene_id | "XLOC_281741"; transcript_id | "Novel_003953"; exon_number | "3"; gene_type | " |
| scaffold4Cufflinks | exon | 76155 | 76348 | . | + | . | gene_id | "XLOC_281741"; transcript_id | "Novel_003953"; exon_number | "4"; gene_type | " |
| scaffold4Cufflinks | exon | 76425 | 76536 | . | + | . | gene_id | "XLOC_281741"; transcript_id | "Novel_003953"; exon_number | "5"; gene_type | " |
| scaffold4Cufflinks | exon | 76740 | 77215 | . | + | . | gene_id | "XLOC_281741"; transcript_id | "Novel_003953"; exon_number | "6"; gene_type | " |
| scaffold4Cufflinks | exon | 75988 | 76348 | . | + | . | gene_id | "XLOC_281741"; transcript_id | "Novel_003954"; exon_number | "1"; gene_type | " |
| scaffold4Cufflinks | exon | 76425 | 76536 | . | + | . | gene_id | "XLOC_281741"; transcript_id | "Novel_003954"; exon_number | "2"; gene_type | " |
| scaffold4Cufflinks | exon | 76740 | 76844 | . | + | . | gene_id | "XLOC_281741"; transcript_id | "Novel_003954"; exon_number | "3"; gene_type | " |
| scaffold4Cufflinks | exon | 76921 | 77005 | . | + | . | gene_id | "XLOC_281741"; transcript_id | "Novel_003954"; exon_number | "4"; gene_type | " |
| scaffold4Cufflinks | exon | 6641  | 7116  | . | - | . | gene_id | "XLOC_281743"; transcript_id | "Novel_003955"; exon_number | "1"; gene_type | " |
| scaffold4Cufflinks | exon | 7836  | 7900  | . | - | . | gene_id | "XLOC_281743"; transcript_id | "Novel_003955"; exon_number | "2"; gene_type | " |
| scaffold4Cufflinks | exon | 7987  | 8024  | . | - | . | gene_id | "XLOC_281743"; transcript_id | "Novel_003955"; exon_number | "3"; gene_type | " |
| scaffold4Cufflinks | exon | 228   | 1036  | . | + | . | gene_id | "XLOC_281859"; transcript_id | "Novel_003956"; exon_number | "1"; gene_type | " |
| scaffold4Cufflinks | exon | 1118  | 1174  | . | + | . | gene_id | "XLOC_281859"; transcript_id | "Novel_003956"; exon_number | "2"; gene_type | " |
| scaffold4Cufflinks | exon | 1252  | 1326  | . | + | . | gene_id | "XLOC_281859"; transcript_id | "Novel_003956"; exon_number | "3"; gene_type | " |
| scaffold4Cufflinks | exon | 2265  | 2813  | . | + | . | gene_id | "XLOC_281859"; transcript_id | "Novel_003956"; exon_number | "4"; gene_type | " |
| scaffold4Cufflinks | exon | 228   | 1174  | . | + | . | gene_id | "XLOC_281859"; transcript_id | "Novel_003957"; exon_number | "1"; gene_type | " |

|                    |      |         |         |   |   |   |                                                                                   |
|--------------------|------|---------|---------|---|---|---|-----------------------------------------------------------------------------------|
| scaffold4Cufflinks | exon | 1252    | 1326    | . | + | . | gene_id "XLOC_281859"; transcript_id "Novel_003957"; exon_number "2"; gene_type " |
| scaffold4Cufflinks | exon | 2265    | 2813    | . | + | . | gene_id "XLOC_281859"; transcript_id "Novel_003957"; exon_number "3"; gene_type " |
| scaffold4Cufflinks | exon | 244     | 1007    | . | + | . | gene_id "XLOC_281859"; transcript_id "Novel_003958"; exon_number "1"; gene_type " |
| scaffold4Cufflinks | exon | 1118    | 1174    | . | + | . | gene_id "XLOC_281859"; transcript_id "Novel_003958"; exon_number "2"; gene_type " |
| scaffold4Cufflinks | exon | 1252    | 1326    | . | + | . | gene_id "XLOC_281859"; transcript_id "Novel_003958"; exon_number "3"; gene_type " |
| scaffold4Cufflinks | exon | 2265    | 2557    | . | + | . | gene_id "XLOC_281859"; transcript_id "Novel_003958"; exon_number "4"; gene_type " |
| scaffold4Cufflinks | exon | 584     | 1326    | . | + | . | gene_id "XLOC_281859"; transcript_id "Novel_003959"; exon_number "1"; gene_type " |
| scaffold4Cufflinks | exon | 2265    | 2555    | . | + | . | gene_id "XLOC_281859"; transcript_id "Novel_003959"; exon_number "2"; gene_type " |
| scaffold4Cufflinks | exon | 18706   | 19274   | . | + | . | gene_id "XLOC_281861"; transcript_id "Novel_003960"; exon_number "1"; gene_type " |
| scaffold4Cufflinks | exon | 19872   | 20205   | . | + | . | gene_id "XLOC_281861"; transcript_id "Novel_003960"; exon_number "2"; gene_type " |
| scaffold4Cufflinks | exon | 20303   | 20877   | . | + | . | gene_id "XLOC_281862"; transcript_id "Novel_003961"; exon_number "1"; gene_type " |
| scaffold4Cufflinks | exon | 20957   | 21524   | . | + | . | gene_id "XLOC_281862"; transcript_id "Novel_003961"; exon_number "2"; gene_type " |
| scaffold4Cufflinks | exon | 29544   | 29612   | . | + | . | gene_id "XLOC_281864"; transcript_id "Novel_003962"; exon_number "1"; gene_type " |
| scaffold4Cufflinks | exon | 30811   | 31423   | . | + | . | gene_id "XLOC_281864"; transcript_id "Novel_003962"; exon_number "2"; gene_type " |
| scaffold4Cufflinks | exon | 31551   | 31909   | . | + | . | gene_id "XLOC_281864"; transcript_id "Novel_003962"; exon_number "3"; gene_type " |
| scaffold4Cufflinks | exon | 29546   | 29612   | . | + | . | gene_id "XLOC_281864"; transcript_id "Novel_003963"; exon_number "1"; gene_type " |
| scaffold4Cufflinks | exon | 30811   | 32335   | . | + | . | gene_id "XLOC_281864"; transcript_id "Novel_003963"; exon_number "2"; gene_type " |
| scaffold4Cufflinks | exon | 49884   | 50404   | . | - | . | gene_id "XLOC_281930"; transcript_id "Novel_003964"; exon_number "1"; gene_type " |
| scaffold4Cufflinks | exon | 50853   | 51149   | . | - | . | gene_id "XLOC_281930"; transcript_id "Novel_003964"; exon_number "2"; gene_type " |
| scaffold4Cufflinks | exon | 17993   | 18569   | . | + | . | gene_id "XLOC_282177"; transcript_id "Novel_003965"; exon_number "1"; gene_type " |
| scaffold4Cufflinks | exon | 18787   | 18949   | . | + | . | gene_id "XLOC_282177"; transcript_id "Novel_003965"; exon_number "2"; gene_type " |
| scaffold4Cufflinks | exon | 19350   | 19757   | . | + | . | gene_id "XLOC_282177"; transcript_id "Novel_003966"; exon_number "1"; gene_type " |
| scaffold4Cufflinks | exon | 20365   | 20653   | . | + | . | gene_id "XLOC_282177"; transcript_id "Novel_003966"; exon_number "2"; gene_type " |
| scaffold4Cufflinks | exon | 48226   | 48494   | . | - | . | gene_id "XLOC_282281"; transcript_id "Novel_003967"; exon_number "1"; gene_type " |
| scaffold4Cufflinks | exon | 48573   | 48778   | . | - | . | gene_id "XLOC_282281"; transcript_id "Novel_003967"; exon_number "2"; gene_type " |
| scaffold4Cufflinks | exon | 1095093 | 1095167 | . | + | . | gene_id "XLOC_282596"; transcript_id "Novel_003968"; exon_number "1"; gene_type " |
| scaffold4Cufflinks | exon | 1095506 | 1095588 | . | + | . | gene_id "XLOC_282596"; transcript_id "Novel_003968"; exon_number "2"; gene_type " |
| scaffold4Cufflinks | exon | 1096927 | 1097323 | . | + | . | gene_id "XLOC_282596"; transcript_id "Novel_003968"; exon_number "3"; gene_type " |
| scaffold4Cufflinks | exon | 359226  | 359422  | . | - | . | gene_id "XLOC_282640"; transcript_id "Novel_003969"; exon_number "1"; gene_type " |
| scaffold4Cufflinks | exon | 359539  | 360206  | . | - | . | gene_id "XLOC_282640"; transcript_id "Novel_003969"; exon_number "2"; gene_type " |
| scaffold4Cufflinks | exon | 27507   | 27729   | . | - | . | gene_id "XLOC_282804"; transcript_id "Novel_003970"; exon_number "1"; gene_type " |
| scaffold4Cufflinks | exon | 27951   | 28021   | . | - | . | gene_id "XLOC_282804"; transcript_id "Novel_003970"; exon_number "2"; gene_type " |
| scaffold4Cufflinks | exon | 927295  | 927364  | . | + | . | gene_id "XLOC_283147"; transcript_id "Novel_003971"; exon_number "1"; gene_type " |
| scaffold4Cufflinks | exon | 927455  | 927535  | . | + | . | gene_id "XLOC_283147"; transcript_id "Novel_003971"; exon_number "2"; gene_type " |
| scaffold4Cufflinks | exon | 927672  | 927890  | . | + | . | gene_id "XLOC_283147"; transcript_id "Novel_003971"; exon_number "3"; gene_type " |

|                    |      |         |         |   |   |   |         |                |               |                 |             |      |           |   |
|--------------------|------|---------|---------|---|---|---|---------|----------------|---------------|-----------------|-------------|------|-----------|---|
| scaffold4Cufflinks | exon | 927980  | 929080  | . | + | . | gene_id | "XLOC_283147"; | transcript_id | "Novel_003971"; | exon_number | "4"; | gene_type | " |
| scaffold4Cufflinks | exon | 52693   | 53414   | . | + | . | gene_id | "XLOC_283389"; | transcript_id | "Novel_003972"; | exon_number | "1"; | gene_type | " |
| scaffold4Cufflinks | exon | 70745   | 72119   | . | - | . | gene_id | "XLOC_283398"; | transcript_id | "Novel_003973"; | exon_number | "1"; | gene_type | " |
| scaffold4Cufflinks | exon | 72236   | 75086   | . | - | . | gene_id | "XLOC_283398"; | transcript_id | "Novel_003973"; | exon_number | "2"; | gene_type | " |
| scaffold4Cufflinks | exon | 1664867 | 1665653 | . | - | . | gene_id | "XLOC_283959"; | transcript_id | "Novel_003974"; | exon_number | "1"; | gene_type | " |
| scaffold4Cufflinks | exon | 1665731 | 1665849 | . | - | . | gene_id | "XLOC_283959"; | transcript_id | "Novel_003974"; | exon_number | "2"; | gene_type | " |
| scaffold4Cufflinks | exon | 2823377 | 2832014 | . | - | . | gene_id | "XLOC_284073"; | transcript_id | "Novel_003975"; | exon_number | "1"; | gene_type | " |
| scaffold4Cufflinks | exon | 2832167 | 2832948 | . | - | . | gene_id | "XLOC_284073"; | transcript_id | "Novel_003975"; | exon_number | "2"; | gene_type | " |
| scaffold4Cufflinks | exon | 65473   | 65729   | . | + | . | gene_id | "XLOC_284138"; | transcript_id | "Novel_003976"; | exon_number | "1"; | gene_type | " |
| scaffold4Cufflinks | exon | 43071   | 44198   | . | - | . | gene_id | "XLOC_284373"; | transcript_id | "Novel_003977"; | exon_number | "1"; | gene_type | " |
| scaffold4Cufflinks | exon | 45520   | 45620   | . | - | . | gene_id | "XLOC_284373"; | transcript_id | "Novel_003977"; | exon_number | "2"; | gene_type | " |
| scaffold4Cufflinks | exon | 37788   | 37862   | . | + | . | gene_id | "XLOC_284399"; | transcript_id | "Novel_003978"; | exon_number | "1"; | gene_type | " |
| scaffold4Cufflinks | exon | 38606   | 39012   | . | + | . | gene_id | "XLOC_284399"; | transcript_id | "Novel_003978"; | exon_number | "2"; | gene_type | " |
| scaffold4Cufflinks | exon | 11928   | 12179   | . | + | . | gene_id | "XLOC_284619"; | transcript_id | "Novel_003979"; | exon_number | "1"; | gene_type | " |
| scaffold4Cufflinks | exon | 1       | 558     | . | - | . | gene_id | "XLOC_284702"; | transcript_id | "Novel_003980"; | exon_number | "1"; | gene_type | " |
| scaffold4Cufflinks | exon | 645     | 1311    | . | - | . | gene_id | "XLOC_284702"; | transcript_id | "Novel_003980"; | exon_number | "2"; | gene_type | " |
| scaffold4Cufflinks | exon | 1       | 558     | . | - | . | gene_id | "XLOC_284702"; | transcript_id | "Novel_003981"; | exon_number | "1"; | gene_type | " |
| scaffold4Cufflinks | exon | 645     | 924     | . | - | . | gene_id | "XLOC_284702"; | transcript_id | "Novel_003981"; | exon_number | "2"; | gene_type | " |
| scaffold4Cufflinks | exon | 1352    | 1415    | . | - | . | gene_id | "XLOC_284702"; | transcript_id | "Novel_003981"; | exon_number | "3"; | gene_type | " |
| scaffold4Cufflinks | exon | 1521    | 1923    | . | - | . | gene_id | "XLOC_284702"; | transcript_id | "Novel_003981"; | exon_number | "4"; | gene_type | " |
| scaffold4Cufflinks | exon | 2       | 558     | . | - | . | gene_id | "XLOC_284702"; | transcript_id | "Novel_003982"; | exon_number | "1"; | gene_type | " |
| scaffold4Cufflinks | exon | 645     | 924     | . | - | . | gene_id | "XLOC_284702"; | transcript_id | "Novel_003982"; | exon_number | "2"; | gene_type | " |
| scaffold4Cufflinks | exon | 1352    | 1415    | . | - | . | gene_id | "XLOC_284702"; | transcript_id | "Novel_003982"; | exon_number | "3"; | gene_type | " |
| scaffold4Cufflinks | exon | 1521    | 1642    | . | - | . | gene_id | "XLOC_284702"; | transcript_id | "Novel_003982"; | exon_number | "4"; | gene_type | " |
| scaffold4Cufflinks | exon | 1950    | 2075    | . | - | . | gene_id | "XLOC_284702"; | transcript_id | "Novel_003982"; | exon_number | "5"; | gene_type | " |
| scaffold4Cufflinks | exon | 2497    | 2507    | . | - | . | gene_id | "XLOC_284702"; | transcript_id | "Novel_003982"; | exon_number | "6"; | gene_type | " |
| scaffold4Cufflinks | exon | 323     | 924     | . | - | . | gene_id | "XLOC_284702"; | transcript_id | "Novel_003983"; | exon_number | "1"; | gene_type | " |
| scaffold4Cufflinks | exon | 1352    | 1415    | . | - | . | gene_id | "XLOC_284702"; | transcript_id | "Novel_003983"; | exon_number | "2"; | gene_type | " |
| scaffold4Cufflinks | exon | 1521    | 1642    | . | - | . | gene_id | "XLOC_284702"; | transcript_id | "Novel_003983"; | exon_number | "3"; | gene_type | " |
| scaffold4Cufflinks | exon | 1950    | 2074    | . | - | . | gene_id | "XLOC_284702"; | transcript_id | "Novel_003983"; | exon_number | "4"; | gene_type | " |
| scaffold4Cufflinks | exon | 2254    | 2799    | . | - | . | gene_id | "XLOC_284702"; | transcript_id | "Novel_003984"; | exon_number | "1"; | gene_type | " |
| scaffold4Cufflinks | exon | 2891    | 2936    | . | - | . | gene_id | "XLOC_284702"; | transcript_id | "Novel_003984"; | exon_number | "2"; | gene_type | " |
| scaffold4Cufflinks | exon | 38677   | 39538   | . | + | . | gene_id | "XLOC_284868"; | transcript_id | "Novel_003985"; | exon_number | "1"; | gene_type | " |
| scaffold4Cufflinks | exon | 39699   | 40359   | . | + | . | gene_id | "XLOC_284868"; | transcript_id | "Novel_003985"; | exon_number | "2"; | gene_type | " |
| scaffold4Cufflinks | exon | 41603   | 41743   | . | + | . | gene_id | "XLOC_284868"; | transcript_id | "Novel_003985"; | exon_number | "3"; | gene_type | " |

|                         |        |        |   |   |   |         |                              |                             |                 |   |
|-------------------------|--------|--------|---|---|---|---------|------------------------------|-----------------------------|-----------------|---|
| scaffold4Cufflinks exon | 42217  | 42747  | . | + | . | gene_id | "XLOC_284868"; transcript_id | "Novel_003985"; exon_number | "4"; gene_type  | " |
| scaffold4Cufflinks exon | 19299  | 19306  | . | + | . | gene_id | "XLOC_284907"; transcript_id | "Novel_003986"; exon_number | "1"; gene_type  | " |
| scaffold4Cufflinks exon | 19855  | 21186  | . | + | . | gene_id | "XLOC_284907"; transcript_id | "Novel_003986"; exon_number | "2"; gene_type  | " |
| scaffold4Cufflinks exon | 64     | 150    | . | + | . | gene_id | "XLOC_285072"; transcript_id | "Novel_003987"; exon_number | "1"; gene_type  | " |
| scaffold4Cufflinks exon | 529    | 605    | . | + | . | gene_id | "XLOC_285072"; transcript_id | "Novel_003987"; exon_number | "2"; gene_type  | " |
| scaffold4Cufflinks exon | 734    | 885    | . | + | . | gene_id | "XLOC_285072"; transcript_id | "Novel_003987"; exon_number | "3"; gene_type  | " |
| scaffold4Cufflinks exon | 978    | 1098   | . | + | . | gene_id | "XLOC_285072"; transcript_id | "Novel_003987"; exon_number | "4"; gene_type  | " |
| scaffold4Cufflinks exon | 674    | 885    | . | + | . | gene_id | "XLOC_285072"; transcript_id | "Novel_003988"; exon_number | "1"; gene_type  | " |
| scaffold4Cufflinks exon | 978    | 1099   | . | + | . | gene_id | "XLOC_285072"; transcript_id | "Novel_003988"; exon_number | "2"; gene_type  | " |
| scaffold4Cufflinks exon | 264125 | 264517 | . | + | . | gene_id | "XLOC_285131"; transcript_id | "Novel_003989"; exon_number | "1"; gene_type  | " |
| scaffold4Cufflinks exon | 266044 | 266256 | . | + | . | gene_id | "XLOC_285131"; transcript_id | "Novel_003989"; exon_number | "2"; gene_type  | " |
| scaffold4Cufflinks exon | 267429 | 267522 | . | + | . | gene_id | "XLOC_285131"; transcript_id | "Novel_003989"; exon_number | "3"; gene_type  | " |
| scaffold4Cufflinks exon | 268052 | 268481 | . | + | . | gene_id | "XLOC_285131"; transcript_id | "Novel_003989"; exon_number | "4"; gene_type  | " |
| scaffold4Cufflinks exon | 264125 | 264517 | . | + | . | gene_id | "XLOC_285131"; transcript_id | "Novel_003990"; exon_number | "1"; gene_type  | " |
| scaffold4Cufflinks exon | 266044 | 268481 | . | + | . | gene_id | "XLOC_285131"; transcript_id | "Novel_003990"; exon_number | "2"; gene_type  | " |
| scaffold4Cufflinks exon | 264137 | 264342 | . | + | . | gene_id | "XLOC_285131"; transcript_id | "Novel_003991"; exon_number | "1"; gene_type  | " |
| scaffold4Cufflinks exon | 264418 | 264517 | . | + | . | gene_id | "XLOC_285131"; transcript_id | "Novel_003991"; exon_number | "2"; gene_type  | " |
| scaffold4Cufflinks exon | 266044 | 266256 | . | + | . | gene_id | "XLOC_285131"; transcript_id | "Novel_003991"; exon_number | "3"; gene_type  | " |
| scaffold4Cufflinks exon | 267429 | 267522 | . | + | . | gene_id | "XLOC_285131"; transcript_id | "Novel_003991"; exon_number | "4"; gene_type  | " |
| scaffold4Cufflinks exon | 268052 | 268082 | . | + | . | gene_id | "XLOC_285131"; transcript_id | "Novel_003991"; exon_number | "5"; gene_type  | " |
| scaffold4Cufflinks exon | 264550 | 266256 | . | + | . | gene_id | "XLOC_285131"; transcript_id | "Novel_003992"; exon_number | "1"; gene_type  | " |
| scaffold4Cufflinks exon | 267429 | 267522 | . | + | . | gene_id | "XLOC_285131"; transcript_id | "Novel_003992"; exon_number | "2"; gene_type  | " |
| scaffold4Cufflinks exon | 268052 | 268082 | . | + | . | gene_id | "XLOC_285131"; transcript_id | "Novel_003992"; exon_number | "3"; gene_type  | " |
| scaffold4Cufflinks exon | 10894  | 10979  | . | - | . | gene_id | "XLOC_285645"; transcript_id | "Novel_003993"; exon_number | "1"; gene_type  | " |
| scaffold4Cufflinks exon | 11684  | 11811  | . | - | . | gene_id | "XLOC_285645"; transcript_id | "Novel_003993"; exon_number | "2"; gene_type  | " |
| scaffold4Cufflinks exon | 48394  | 48910  | . | + | . | gene_id | "XLOC_285895"; transcript_id | "Novel_003994"; exon_number | "1"; gene_type  | " |
| scaffold4Cufflinks exon | 49175  | 49279  | . | + | . | gene_id | "XLOC_285895"; transcript_id | "Novel_003994"; exon_number | "2"; gene_type  | " |
| scaffold4Cufflinks exon | 49449  | 49609  | . | + | . | gene_id | "XLOC_285895"; transcript_id | "Novel_003994"; exon_number | "3"; gene_type  | " |
| scaffold4Cufflinks exon | 49706  | 49798  | . | + | . | gene_id | "XLOC_285895"; transcript_id | "Novel_003994"; exon_number | "4"; gene_type  | " |
| scaffold4Cufflinks exon | 49907  | 50092  | . | + | . | gene_id | "XLOC_285895"; transcript_id | "Novel_003994"; exon_number | "5"; gene_type  | " |
| scaffold4Cufflinks exon | 50271  | 50432  | . | + | . | gene_id | "XLOC_285895"; transcript_id | "Novel_003994"; exon_number | "6"; gene_type  | " |
| scaffold4Cufflinks exon | 50674  | 50818  | . | + | . | gene_id | "XLOC_285895"; transcript_id | "Novel_003994"; exon_number | "7"; gene_type  | " |
| scaffold4Cufflinks exon | 50927  | 51069  | . | + | . | gene_id | "XLOC_285895"; transcript_id | "Novel_003994"; exon_number | "8"; gene_type  | " |
| scaffold4Cufflinks exon | 51158  | 51214  | . | + | . | gene_id | "XLOC_285895"; transcript_id | "Novel_003994"; exon_number | "9"; gene_type  | " |
| scaffold4Cufflinks exon | 51294  | 51373  | . | + | . | gene_id | "XLOC_285895"; transcript_id | "Novel_003994"; exon_number | "10"; gene_type | " |

|                    |      |        |        |   |   |   |                                                                                   |
|--------------------|------|--------|--------|---|---|---|-----------------------------------------------------------------------------------|
| scaffold4Cufflinks | exon | 51455  | 51530  | . | + | . | gene_id "XLOC_285895"; transcript_id "Novel_003994"; exon_number "11"; gene_type  |
| scaffold4Cufflinks | exon | 51822  | 52007  | . | + | . | gene_id "XLOC_285895"; transcript_id "Novel_003994"; exon_number "12"; gene_type  |
| scaffold4Cufflinks | exon | 52395  | 52462  | . | + | . | gene_id "XLOC_285895"; transcript_id "Novel_003994"; exon_number "13"; gene_type  |
| scaffold4Cufflinks | exon | 52594  | 52712  | . | + | . | gene_id "XLOC_285895"; transcript_id "Novel_003994"; exon_number "14"; gene_type  |
| scaffold4Cufflinks | exon | 53163  | 53284  | . | + | . | gene_id "XLOC_285895"; transcript_id "Novel_003994"; exon_number "15"; gene_type  |
| scaffold4Cufflinks | exon | 53688  | 53786  | . | + | . | gene_id "XLOC_285895"; transcript_id "Novel_003994"; exon_number "16"; gene_type  |
| scaffold4Cufflinks | exon | 53873  | 54352  | . | + | . | gene_id "XLOC_285895"; transcript_id "Novel_003994"; exon_number "17"; gene_type  |
| scaffold4Cufflinks | exon | 54435  | 54533  | . | + | . | gene_id "XLOC_285895"; transcript_id "Novel_003994"; exon_number "18"; gene_type  |
| scaffold4Cufflinks | exon | 54625  | 54751  | . | + | . | gene_id "XLOC_285895"; transcript_id "Novel_003994"; exon_number "19"; gene_type  |
| scaffold4Cufflinks | exon | 48507  | 48910  | . | + | . | gene_id "XLOC_285895"; transcript_id "Novel_003995"; exon_number "1"; gene_type " |
| scaffold4Cufflinks | exon | 49175  | 49279  | . | + | . | gene_id "XLOC_285895"; transcript_id "Novel_003995"; exon_number "2"; gene_type " |
| scaffold4Cufflinks | exon | 49449  | 49609  | . | + | . | gene_id "XLOC_285895"; transcript_id "Novel_003995"; exon_number "3"; gene_type " |
| scaffold4Cufflinks | exon | 49706  | 49798  | . | + | . | gene_id "XLOC_285895"; transcript_id "Novel_003995"; exon_number "4"; gene_type " |
| scaffold4Cufflinks | exon | 49907  | 50092  | . | + | . | gene_id "XLOC_285895"; transcript_id "Novel_003995"; exon_number "5"; gene_type " |
| scaffold4Cufflinks | exon | 50271  | 50432  | . | + | . | gene_id "XLOC_285895"; transcript_id "Novel_003995"; exon_number "6"; gene_type " |
| scaffold4Cufflinks | exon | 50674  | 50818  | . | + | . | gene_id "XLOC_285895"; transcript_id "Novel_003995"; exon_number "7"; gene_type " |
| scaffold4Cufflinks | exon | 50927  | 51069  | . | + | . | gene_id "XLOC_285895"; transcript_id "Novel_003995"; exon_number "8"; gene_type " |
| scaffold4Cufflinks | exon | 51158  | 51214  | . | + | . | gene_id "XLOC_285895"; transcript_id "Novel_003995"; exon_number "9"; gene_type " |
| scaffold4Cufflinks | exon | 51294  | 51373  | . | + | . | gene_id "XLOC_285895"; transcript_id "Novel_003995"; exon_number "10"; gene_type  |
| scaffold4Cufflinks | exon | 51455  | 51530  | . | + | . | gene_id "XLOC_285895"; transcript_id "Novel_003995"; exon_number "11"; gene_type  |
| scaffold4Cufflinks | exon | 51822  | 52007  | . | + | . | gene_id "XLOC_285895"; transcript_id "Novel_003995"; exon_number "12"; gene_type  |
| scaffold4Cufflinks | exon | 52395  | 52462  | . | + | . | gene_id "XLOC_285895"; transcript_id "Novel_003995"; exon_number "13"; gene_type  |
| scaffold4Cufflinks | exon | 52594  | 52712  | . | + | . | gene_id "XLOC_285895"; transcript_id "Novel_003995"; exon_number "14"; gene_type  |
| scaffold4Cufflinks | exon | 53163  | 53655  | . | + | . | gene_id "XLOC_285895"; transcript_id "Novel_003995"; exon_number "15"; gene_type  |
| scaffold4Cufflinks | exon | 40906  | 41206  | . | + | . | gene_id "XLOC_285958"; transcript_id "Novel_003996"; exon_number "1"; gene_type " |
| scaffold4Cufflinks | exon | 41304  | 41572  | . | + | . | gene_id "XLOC_285958"; transcript_id "Novel_003996"; exon_number "2"; gene_type " |
| scaffold4Cufflinks | exon | 42102  | 42861  | . | + | . | gene_id "XLOC_285958"; transcript_id "Novel_003996"; exon_number "3"; gene_type " |
| scaffold4Cufflinks | exon | 659466 | 659889 | . | + | . | gene_id "XLOC_286030"; transcript_id "Novel_003997"; exon_number "1"; gene_type " |
| scaffold4Cufflinks | exon | 660047 | 660339 | . | + | . | gene_id "XLOC_286030"; transcript_id "Novel_003997"; exon_number "2"; gene_type " |
| scaffold4Cufflinks | exon | 8157   | 8207   | . | + | . | gene_id "XLOC_286187"; transcript_id "Novel_003998"; exon_number "1"; gene_type " |
| scaffold4Cufflinks | exon | 8859   | 9342   | . | + | . | gene_id "XLOC_286187"; transcript_id "Novel_003998"; exon_number "2"; gene_type " |
| scaffold4Cufflinks | exon | 9450   | 9552   | . | + | . | gene_id "XLOC_286187"; transcript_id "Novel_003998"; exon_number "3"; gene_type " |
| scaffold4Cufflinks | exon | 8161   | 8207   | . | + | . | gene_id "XLOC_286187"; transcript_id "Novel_003999"; exon_number "1"; gene_type " |
| scaffold4Cufflinks | exon | 8859   | 9560   | . | + | . | gene_id "XLOC_286187"; transcript_id "Novel_003999"; exon_number "2"; gene_type " |
| scaffold4Cufflinks | exon | 6729   | 7692   | . | - | . | gene_id "XLOC_286523"; transcript_id "Novel_004000"; exon_number "1"; gene_type " |

|                    |      |       |       |   |   |   |                                                                                   |
|--------------------|------|-------|-------|---|---|---|-----------------------------------------------------------------------------------|
| scaffold4Cufflinks | exon | 12896 | 13122 | . | - | . | gene_id "XLOC_286523"; transcript_id "Novel_004000"; exon_number "2"; gene_type " |
| scaffold4Cufflinks | exon | 6839  | 7692  | . | - | . | gene_id "XLOC_286523"; transcript_id "Novel_004001"; exon_number "1"; gene_type " |
| scaffold4Cufflinks | exon | 12896 | 13073 | . | - | . | gene_id "XLOC_286523"; transcript_id "Novel_004001"; exon_number "2"; gene_type " |
| scaffold4Cufflinks | exon | 13322 | 13351 | . | - | . | gene_id "XLOC_286523"; transcript_id "Novel_004001"; exon_number "3"; gene_type " |
| scaffold4Cufflinks | exon | 1257  | 1372  | . | + | . | gene_id "XLOC_286649"; transcript_id "Novel_004002"; exon_number "1"; gene_type " |
| scaffold4Cufflinks | exon | 1625  | 1733  | . | + | . | gene_id "XLOC_286649"; transcript_id "Novel_004002"; exon_number "2"; gene_type " |
| scaffold4Cufflinks | exon | 1359  | 1372  | . | + | . | gene_id "XLOC_286649"; transcript_id "Novel_004003"; exon_number "1"; gene_type " |
| scaffold4Cufflinks | exon | 41528 | 41738 | . | + | . | gene_id "XLOC_286649"; transcript_id "Novel_004003"; exon_number "2"; gene_type " |
| scaffold4Cufflinks | exon | 42547 | 43622 | . | + | . | gene_id "XLOC_286649"; transcript_id "Novel_004003"; exon_number "3"; gene_type " |
| scaffold4Cufflinks | exon | 41515 | 41738 | . | + | . | gene_id "XLOC_286649"; transcript_id "Novel_004004"; exon_number "1"; gene_type " |
| scaffold4Cufflinks | exon | 42547 | 42784 | . | + | . | gene_id "XLOC_286649"; transcript_id "Novel_004004"; exon_number "2"; gene_type " |
| scaffold4Cufflinks | exon | 43044 | 43628 | . | + | . | gene_id "XLOC_286649"; transcript_id "Novel_004004"; exon_number "3"; gene_type " |
| scaffold4Cufflinks | exon | 39240 | 39628 | . | + | . | gene_id "XLOC_286726"; transcript_id "Novel_004005"; exon_number "1"; gene_type " |
| scaffold4Cufflinks | exon | 40222 | 40372 | . | + | . | gene_id "XLOC_286726"; transcript_id "Novel_004005"; exon_number "2"; gene_type " |
| scaffold4Cufflinks | exon | 40448 | 40522 | . | + | . | gene_id "XLOC_286726"; transcript_id "Novel_004005"; exon_number "3"; gene_type " |
| scaffold4Cufflinks | exon | 40709 | 40857 | . | + | . | gene_id "XLOC_286726"; transcript_id "Novel_004005"; exon_number "4"; gene_type " |
| scaffold4Cufflinks | exon | 40947 | 41003 | . | + | . | gene_id "XLOC_286726"; transcript_id "Novel_004005"; exon_number "5"; gene_type " |
| scaffold4Cufflinks | exon | 41156 | 41248 | . | + | . | gene_id "XLOC_286726"; transcript_id "Novel_004005"; exon_number "6"; gene_type " |
| scaffold4Cufflinks | exon | 41373 | 41519 | . | + | . | gene_id "XLOC_286726"; transcript_id "Novel_004005"; exon_number "7"; gene_type " |
| scaffold4Cufflinks | exon | 43321 | 43754 | . | + | . | gene_id "XLOC_286726"; transcript_id "Novel_004005"; exon_number "8"; gene_type " |
| scaffold4Cufflinks | exon | 5956  | 8307  | . | + | . | gene_id "XLOC_286856"; transcript_id "Novel_004006"; exon_number "1"; gene_type " |
| scaffold4Cufflinks | exon | 8385  | 8690  | . | + | . | gene_id "XLOC_286856"; transcript_id "Novel_004006"; exon_number "2"; gene_type " |
| scaffold4Cufflinks | exon | 5979  | 7090  | . | + | . | gene_id "XLOC_286856"; transcript_id "Novel_004007"; exon_number "1"; gene_type " |
| scaffold4Cufflinks | exon | 7183  | 7437  | . | + | . | gene_id "XLOC_286856"; transcript_id "Novel_004007"; exon_number "2"; gene_type " |
| scaffold4Cufflinks | exon | 7744  | 7887  | . | + | . | gene_id "XLOC_286856"; transcript_id "Novel_004007"; exon_number "3"; gene_type " |
| scaffold4Cufflinks | exon | 7960  | 8307  | . | + | . | gene_id "XLOC_286856"; transcript_id "Novel_004007"; exon_number "4"; gene_type " |
| scaffold4Cufflinks | exon | 8385  | 8690  | . | + | . | gene_id "XLOC_286856"; transcript_id "Novel_004007"; exon_number "5"; gene_type " |
| scaffold4Cufflinks | exon | 5979  | 7437  | . | + | . | gene_id "XLOC_286856"; transcript_id "Novel_004008"; exon_number "1"; gene_type " |
| scaffold4Cufflinks | exon | 7744  | 8307  | . | + | . | gene_id "XLOC_286856"; transcript_id "Novel_004008"; exon_number "2"; gene_type " |
| scaffold4Cufflinks | exon | 8385  | 8690  | . | + | . | gene_id "XLOC_286856"; transcript_id "Novel_004008"; exon_number "3"; gene_type " |
| scaffold4Cufflinks | exon | 33699 | 33943 | . | + | . | gene_id "XLOC_286977"; transcript_id "Novel_004009"; exon_number "1"; gene_type " |
| scaffold4Cufflinks | exon | 36253 | 36389 | . | + | . | gene_id "XLOC_286977"; transcript_id "Novel_004009"; exon_number "2"; gene_type " |
| scaffold4Cufflinks | exon | 1     | 356   | . | + | . | gene_id "XLOC_287169"; transcript_id "Novel_004010"; exon_number "1"; gene_type " |
| scaffold4Cufflinks | exon | 1689  | 1770  | . | + | . | gene_id "XLOC_287169"; transcript_id "Novel_004010"; exon_number "2"; gene_type " |
| scaffold4Cufflinks | exon | 2070  | 2143  | . | + | . | gene_id "XLOC_287169"; transcript_id "Novel_004010"; exon_number "3"; gene_type " |

|                    |      |       |       |   |   |   |         |                |               |                 |             |       |           |   |
|--------------------|------|-------|-------|---|---|---|---------|----------------|---------------|-----------------|-------------|-------|-----------|---|
| scaffold4Cufflinks | exon | 2237  | 2405  | . | + | . | gene_id | "XLOC_287169"; | transcript_id | "Novel_004010"; | exon_number | "4";  | gene_type | " |
| scaffold4Cufflinks | exon | 2761  | 2820  | . | + | . | gene_id | "XLOC_287169"; | transcript_id | "Novel_004010"; | exon_number | "5";  | gene_type | " |
| scaffold4Cufflinks | exon | 2926  | 3129  | . | + | . | gene_id | "XLOC_287169"; | transcript_id | "Novel_004010"; | exon_number | "6";  | gene_type | " |
| scaffold4Cufflinks | exon | 3231  | 3317  | . | + | . | gene_id | "XLOC_287169"; | transcript_id | "Novel_004010"; | exon_number | "7";  | gene_type | " |
| scaffold4Cufflinks | exon | 3617  | 3724  | . | + | . | gene_id | "XLOC_287169"; | transcript_id | "Novel_004010"; | exon_number | "8";  | gene_type | " |
| scaffold4Cufflinks | exon | 4031  | 4126  | . | + | . | gene_id | "XLOC_287169"; | transcript_id | "Novel_004010"; | exon_number | "9";  | gene_type | " |
| scaffold4Cufflinks | exon | 4246  | 4364  | . | + | . | gene_id | "XLOC_287169"; | transcript_id | "Novel_004010"; | exon_number | "10"; | gene_type | " |
| scaffold4Cufflinks | exon | 4691  | 4981  | . | + | . | gene_id | "XLOC_287169"; | transcript_id | "Novel_004010"; | exon_number | "11"; | gene_type | " |
| scaffold4Cufflinks | exon | 1     | 356   | . | + | . | gene_id | "XLOC_287169"; | transcript_id | "Novel_004011"; | exon_number | "1";  | gene_type | " |
| scaffold4Cufflinks | exon | 1689  | 1770  | . | + | . | gene_id | "XLOC_287169"; | transcript_id | "Novel_004011"; | exon_number | "2";  | gene_type | " |
| scaffold4Cufflinks | exon | 2070  | 2143  | . | + | . | gene_id | "XLOC_287169"; | transcript_id | "Novel_004011"; | exon_number | "3";  | gene_type | " |
| scaffold4Cufflinks | exon | 2237  | 2820  | . | + | . | gene_id | "XLOC_287169"; | transcript_id | "Novel_004011"; | exon_number | "4";  | gene_type | " |
| scaffold4Cufflinks | exon | 2926  | 3129  | . | + | . | gene_id | "XLOC_287169"; | transcript_id | "Novel_004011"; | exon_number | "5";  | gene_type | " |
| scaffold4Cufflinks | exon | 3231  | 3317  | . | + | . | gene_id | "XLOC_287169"; | transcript_id | "Novel_004011"; | exon_number | "6";  | gene_type | " |
| scaffold4Cufflinks | exon | 3617  | 4126  | . | + | . | gene_id | "XLOC_287169"; | transcript_id | "Novel_004011"; | exon_number | "7";  | gene_type | " |
| scaffold4Cufflinks | exon | 4246  | 4364  | . | + | . | gene_id | "XLOC_287169"; | transcript_id | "Novel_004011"; | exon_number | "8";  | gene_type | " |
| scaffold4Cufflinks | exon | 4691  | 4981  | . | + | . | gene_id | "XLOC_287169"; | transcript_id | "Novel_004011"; | exon_number | "9";  | gene_type | " |
| scaffold4Cufflinks | exon | 5     | 356   | . | + | . | gene_id | "XLOC_287169"; | transcript_id | "Novel_004012"; | exon_number | "1";  | gene_type | " |
| scaffold4Cufflinks | exon | 1689  | 1770  | . | + | . | gene_id | "XLOC_287169"; | transcript_id | "Novel_004012"; | exon_number | "2";  | gene_type | " |
| scaffold4Cufflinks | exon | 2070  | 2143  | . | + | . | gene_id | "XLOC_287169"; | transcript_id | "Novel_004012"; | exon_number | "3";  | gene_type | " |
| scaffold4Cufflinks | exon | 2237  | 2820  | . | + | . | gene_id | "XLOC_287169"; | transcript_id | "Novel_004012"; | exon_number | "4";  | gene_type | " |
| scaffold4Cufflinks | exon | 2926  | 3129  | . | + | . | gene_id | "XLOC_287169"; | transcript_id | "Novel_004012"; | exon_number | "5";  | gene_type | " |
| scaffold4Cufflinks | exon | 3231  | 3317  | . | + | . | gene_id | "XLOC_287169"; | transcript_id | "Novel_004012"; | exon_number | "6";  | gene_type | " |
| scaffold4Cufflinks | exon | 3617  | 3724  | . | + | . | gene_id | "XLOC_287169"; | transcript_id | "Novel_004012"; | exon_number | "7";  | gene_type | " |
| scaffold4Cufflinks | exon | 4031  | 4126  | . | + | . | gene_id | "XLOC_287169"; | transcript_id | "Novel_004012"; | exon_number | "8";  | gene_type | " |
| scaffold4Cufflinks | exon | 4246  | 4364  | . | + | . | gene_id | "XLOC_287169"; | transcript_id | "Novel_004012"; | exon_number | "9";  | gene_type | " |
| scaffold4Cufflinks | exon | 4691  | 5617  | . | + | . | gene_id | "XLOC_287169"; | transcript_id | "Novel_004012"; | exon_number | "10"; | gene_type | " |
| scaffold4Cufflinks | exon | 8055  | 8490  | . | + | . | gene_id | "XLOC_287172"; | transcript_id | "Novel_004013"; | exon_number | "1";  | gene_type | " |
| scaffold4Cufflinks | exon | 9568  | 9733  | . | + | . | gene_id | "XLOC_287172"; | transcript_id | "Novel_004013"; | exon_number | "2";  | gene_type | " |
| scaffold4Cufflinks | exon | 9913  | 10023 | . | + | . | gene_id | "XLOC_287172"; | transcript_id | "Novel_004013"; | exon_number | "3";  | gene_type | " |
| scaffold4Cufflinks | exon | 15789 | 16022 | . | - | . | gene_id | "XLOC_287185"; | transcript_id | "Novel_004014"; | exon_number | "1";  | gene_type | " |
| scaffold4Cufflinks | exon | 16911 | 17985 | . | - | . | gene_id | "XLOC_287185"; | transcript_id | "Novel_004014"; | exon_number | "2";  | gene_type | " |
| scaffold4Cufflinks | exon | 36764 | 37513 | . | - | . | gene_id | "XLOC_287191"; | transcript_id | "Novel_004015"; | exon_number | "1";  | gene_type | " |
| scaffold4Cufflinks | exon | 38046 | 38177 | . | - | . | gene_id | "XLOC_287191"; | transcript_id | "Novel_004015"; | exon_number | "2";  | gene_type | " |
| scaffold4Cufflinks | exon | 38318 | 38500 | . | - | . | gene_id | "XLOC_287191"; | transcript_id | "Novel_004015"; | exon_number | "3";  | gene_type | " |

|                    |      |        |        |   |   |   |         |                |               |                 |             |      |           |   |
|--------------------|------|--------|--------|---|---|---|---------|----------------|---------------|-----------------|-------------|------|-----------|---|
| scaffold4Cufflinks | exon | 38581  | 38765  | . | - | . | gene_id | "XLOC_287191"; | transcript_id | "Novel_004015"; | exon_number | "4"; | gene_type | " |
| scaffold4Cufflinks | exon | 39590  | 39786  | . | - | . | gene_id | "XLOC_287191"; | transcript_id | "Novel_004015"; | exon_number | "5"; | gene_type | " |
| scaffold4Cufflinks | exon | 39880  | 40008  | . | - | . | gene_id | "XLOC_287191"; | transcript_id | "Novel_004015"; | exon_number | "6"; | gene_type | " |
| scaffold4Cufflinks | exon | 39508  | 39786  | . | - | . | gene_id | "XLOC_287191"; | transcript_id | "Novel_004016"; | exon_number | "1"; | gene_type | " |
| scaffold4Cufflinks | exon | 39880  | 40006  | . | - | . | gene_id | "XLOC_287191"; | transcript_id | "Novel_004016"; | exon_number | "2"; | gene_type | " |
| scaffold4Cufflinks | exon | 7181   | 7273   | . | + | . | gene_id | "XLOC_287315"; | transcript_id | "Novel_004017"; | exon_number | "1"; | gene_type | " |
| scaffold4Cufflinks | exon | 7585   | 8122   | . | + | . | gene_id | "XLOC_287315"; | transcript_id | "Novel_004017"; | exon_number | "2"; | gene_type | " |
| scaffold4Cufflinks | exon | 8214   | 8370   | . | + | . | gene_id | "XLOC_287315"; | transcript_id | "Novel_004017"; | exon_number | "3"; | gene_type | " |
| scaffold4Cufflinks | exon | 8477   | 11798  | . | + | . | gene_id | "XLOC_287315"; | transcript_id | "Novel_004017"; | exon_number | "4"; | gene_type | " |
| scaffold4Cufflinks | exon | 11837  | 12025  | . | + | . | gene_id | "XLOC_287315"; | transcript_id | "Novel_004018"; | exon_number | "1"; | gene_type | " |
| scaffold4Cufflinks | exon | 12207  | 14235  | . | + | . | gene_id | "XLOC_287315"; | transcript_id | "Novel_004018"; | exon_number | "2"; | gene_type | " |
| scaffold4Cufflinks | exon | 133034 | 134244 | . | + | . | gene_id | "XLOC_287338"; | transcript_id | "Novel_004019"; | exon_number | "1"; | gene_type | " |
| scaffold4Cufflinks | exon | 135607 | 136296 | . | + | . | gene_id | "XLOC_287338"; | transcript_id | "Novel_004019"; | exon_number | "2"; | gene_type | " |
| scaffold4Cufflinks | exon | 133040 | 133411 | . | + | . | gene_id | "XLOC_287338"; | transcript_id | "Novel_004020"; | exon_number | "1"; | gene_type | " |
| scaffold4Cufflinks | exon | 133493 | 134259 | . | + | . | gene_id | "XLOC_287338"; | transcript_id | "Novel_004020"; | exon_number | "2"; | gene_type | " |
| scaffold4Cufflinks | exon | 2071   | 2151   | . | + | . | gene_id | "XLOC_287926"; | transcript_id | "Novel_004021"; | exon_number | "1"; | gene_type | " |
| scaffold4Cufflinks | exon | 2895   | 3047   | . | + | . | gene_id | "XLOC_287926"; | transcript_id | "Novel_004021"; | exon_number | "2"; | gene_type | " |
| scaffold4Cufflinks | exon | 36621  | 37020  | . | - | . | gene_id | "XLOC_288037"; | transcript_id | "Novel_004022"; | exon_number | "1"; | gene_type | " |
| scaffold4Cufflinks | exon | 37452  | 37665  | . | - | . | gene_id | "XLOC_288037"; | transcript_id | "Novel_004022"; | exon_number | "2"; | gene_type | " |
| scaffold4Cufflinks | exon | 22647  | 22766  | . | - | . | gene_id | "XLOC_288206"; | transcript_id | "Novel_004023"; | exon_number | "1"; | gene_type | " |
| scaffold4Cufflinks | exon | 22967  | 23053  | . | - | . | gene_id | "XLOC_288206"; | transcript_id | "Novel_004023"; | exon_number | "2"; | gene_type | " |
| scaffold4Cufflinks | exon | 23294  | 23308  | . | - | . | gene_id | "XLOC_288206"; | transcript_id | "Novel_004023"; | exon_number | "3"; | gene_type | " |
| scaffold4Cufflinks | exon | 2      | 101    | . | - | . | gene_id | "XLOC_288349"; | transcript_id | "Novel_004024"; | exon_number | "1"; | gene_type | " |
| scaffold4Cufflinks | exon | 223    | 609    | . | - | . | gene_id | "XLOC_288349"; | transcript_id | "Novel_004024"; | exon_number | "2"; | gene_type | " |
| scaffold4Cufflinks | exon | 744    | 809    | . | - | . | gene_id | "XLOC_288349"; | transcript_id | "Novel_004024"; | exon_number | "3"; | gene_type | " |
| scaffold4Cufflinks | exon | 2      | 101    | . | - | . | gene_id | "XLOC_288349"; | transcript_id | "Novel_004025"; | exon_number | "1"; | gene_type | " |
| scaffold4Cufflinks | exon | 223    | 612    | . | - | . | gene_id | "XLOC_288349"; | transcript_id | "Novel_004025"; | exon_number | "2"; | gene_type | " |
| scaffold4Cufflinks | exon | 744    | 880    | . | - | . | gene_id | "XLOC_288349"; | transcript_id | "Novel_004025"; | exon_number | "3"; | gene_type | " |
| scaffold4Cufflinks | exon | 11523  | 12104  | . | + | . | gene_id | "XLOC_288358"; | transcript_id | "Novel_004026"; | exon_number | "1"; | gene_type | " |
| scaffold4Cufflinks | exon | 15     | 1325   | . | - | . | gene_id | "XLOC_288389"; | transcript_id | "Novel_004027"; | exon_number | "1"; | gene_type | " |
| scaffold4Cufflinks | exon | 26179  | 26351  | . | - | . | gene_id | "XLOC_288395"; | transcript_id | "Novel_004028"; | exon_number | "1"; | gene_type | " |
| scaffold4Cufflinks | exon | 26425  | 26479  | . | - | . | gene_id | "XLOC_288395"; | transcript_id | "Novel_004028"; | exon_number | "2"; | gene_type | " |
| scaffold4Cufflinks | exon | 38031  | 38325  | . | - | . | gene_id | "XLOC_288446"; | transcript_id | "Novel_004029"; | exon_number | "1"; | gene_type | " |
| scaffold5Cufflinks | exon | 30147  | 30615  | . | + | . | gene_id | "XLOC_288683"; | transcript_id | "Novel_004030"; | exon_number | "1"; | gene_type | " |
| scaffold5Cufflinks | exon | 2      | 124    | . | - | . | gene_id | "XLOC_288731"; | transcript_id | "Novel_004031"; | exon_number | "1"; | gene_type | " |



|                         |        |        |   |   |                                                                                   |
|-------------------------|--------|--------|---|---|-----------------------------------------------------------------------------------|
| scaffold\Cufflinks\exon | 217    | 302    | . | . | gene_id "XLOC_288731"; transcript_id "Novel_004031"; exon_number "2"; gene_type " |
| scaffold\Cufflinks\exon | 390    | 568    | . | . | gene_id "XLOC_288731"; transcript_id "Novel_004031"; exon_number "3"; gene_type " |
| scaffold\Cufflinks\exon | 1606   | 1807   | . | . | gene_id "XLOC_288731"; transcript_id "Novel_004031"; exon_number "4"; gene_type " |
| scaffold\Cufflinks\exon | 2019   | 2195   | . | . | gene_id "XLOC_288731"; transcript_id "Novel_004031"; exon_number "5"; gene_type " |
| scaffold\Cufflinks\exon | 2283   | 2423   | . | . | gene_id "XLOC_288731"; transcript_id "Novel_004031"; exon_number "6"; gene_type " |
| scaffold\Cufflinks\exon | 2533   | 2649   | . | . | gene_id "XLOC_288731"; transcript_id "Novel_004031"; exon_number "7"; gene_type " |
| scaffold\Cufflinks\exon | 2737   | 3144   | . | . | gene_id "XLOC_288731"; transcript_id "Novel_004031"; exon_number "8"; gene_type " |
| scaffold\Cufflinks\exon | 3924   | 4182   | . | . | gene_id "XLOC_288731"; transcript_id "Novel_004031"; exon_number "9"; gene_type " |
| scaffold\Cufflinks\exon | 104785 | 105792 | . | . | gene_id "XLOC_288987"; transcript_id "Novel_004032"; exon_number "1"; gene_type " |
| scaffold\Cufflinks\exon | 106067 | 106160 | . | . | gene_id "XLOC_288987"; transcript_id "Novel_004032"; exon_number "2"; gene_type " |
| scaffold\Cufflinks\exon | 567026 | 567311 | . | . | gene_id "XLOC_289067"; transcript_id "Novel_004033"; exon_number "1"; gene_type " |
| scaffold\Cufflinks\exon | 570391 | 570595 | . | . | gene_id "XLOC_289067"; transcript_id "Novel_004033"; exon_number "2"; gene_type " |
| scaffold\Cufflinks\exon | 571096 | 571219 | . | . | gene_id "XLOC_289067"; transcript_id "Novel_004033"; exon_number "3"; gene_type " |
| scaffold\Cufflinks\exon | 569024 | 570595 | . | . | gene_id "XLOC_289067"; transcript_id "Novel_004034"; exon_number "1"; gene_type " |
| scaffold\Cufflinks\exon | 571096 | 571168 | . | . | gene_id "XLOC_289067"; transcript_id "Novel_004034"; exon_number "2"; gene_type " |
| scaffold\Cufflinks\exon | 22869  | 24111  | . | . | gene_id "XLOC_289225"; transcript_id "Novel_004035"; exon_number "1"; gene_type " |
| scaffold\Cufflinks\exon | 24388  | 25989  | . | . | gene_id "XLOC_289225"; transcript_id "Novel_004035"; exon_number "2"; gene_type " |
| scaffold\Cufflinks\exon | 24221  | 24601  | . | . | gene_id "XLOC_289225"; transcript_id "Novel_004036"; exon_number "1"; gene_type " |
| scaffold\Cufflinks\exon | 25822  | 25986  | . | . | gene_id "XLOC_289225"; transcript_id "Novel_004036"; exon_number "2"; gene_type " |
| scaffold\Cufflinks\exon | 23854  | 24347  | . | . | gene_id "XLOC_289289"; transcript_id "Novel_004037"; exon_number "1"; gene_type " |
| scaffold\Cufflinks\exon | 24954  | 24999  | . | . | gene_id "XLOC_289289"; transcript_id "Novel_004037"; exon_number "2"; gene_type " |
| scaffold\Cufflinks\exon | 40600  | 40734  | . | + | gene_id "XLOC_289453"; transcript_id "Novel_004038"; exon_number "1"; gene_type " |
| scaffold\Cufflinks\exon | 40816  | 40930  | . | + | gene_id "XLOC_289453"; transcript_id "Novel_004038"; exon_number "2"; gene_type " |
| scaffold\Cufflinks\exon | 157671 | 157698 | . | + | gene_id "XLOC_289470"; transcript_id "Novel_004039"; exon_number "1"; gene_type " |
| scaffold\Cufflinks\exon | 157917 | 158011 | . | + | gene_id "XLOC_289470"; transcript_id "Novel_004039"; exon_number "2"; gene_type " |
| scaffold\Cufflinks\exon | 158125 | 158601 | . | + | gene_id "XLOC_289470"; transcript_id "Novel_004039"; exon_number "3"; gene_type " |
| scaffold\Cufflinks\exon | 158711 | 159020 | . | + | gene_id "XLOC_289471"; transcript_id "Novel_004040"; exon_number "1"; gene_type " |
| scaffold\Cufflinks\exon | 159231 | 159512 | . | + | gene_id "XLOC_289471"; transcript_id "Novel_004040"; exon_number "2"; gene_type " |
| scaffold\Cufflinks\exon | 159628 | 159723 | . | + | gene_id "XLOC_289471"; transcript_id "Novel_004040"; exon_number "3"; gene_type " |
| scaffold\Cufflinks\exon | 160782 | 160960 | . | + | gene_id "XLOC_289471"; transcript_id "Novel_004040"; exon_number "4"; gene_type " |
| scaffold\Cufflinks\exon | 161082 | 161163 | . | + | gene_id "XLOC_289471"; transcript_id "Novel_004040"; exon_number "5"; gene_type " |
| scaffold\Cufflinks\exon | 161444 | 161568 | . | + | gene_id "XLOC_289471"; transcript_id "Novel_004040"; exon_number "6"; gene_type " |
| scaffold\Cufflinks\exon | 162484 | 162576 | . | + | gene_id "XLOC_289471"; transcript_id "Novel_004040"; exon_number "7"; gene_type " |
| scaffold\Cufflinks\exon | 163498 | 163651 | . | + | gene_id "XLOC_289471"; transcript_id "Novel_004040"; exon_number "8"; gene_type " |
| scaffold\Cufflinks\exon | 163752 | 164208 | . | + | gene_id "XLOC_289471"; transcript_id "Novel_004040"; exon_number "9"; gene_type " |

|                         |        |        |   |   |   |                                                                                   |
|-------------------------|--------|--------|---|---|---|-----------------------------------------------------------------------------------|
| scaffold\Cufflinks\exon | 158711 | 159020 | . | + | . | gene_id "XLOC_289471"; transcript_id "Novel_004041"; exon_number "1"; gene_type " |
| scaffold\Cufflinks\exon | 159231 | 159512 | . | + | . | gene_id "XLOC_289471"; transcript_id "Novel_004041"; exon_number "2"; gene_type " |
| scaffold\Cufflinks\exon | 159628 | 159723 | . | + | . | gene_id "XLOC_289471"; transcript_id "Novel_004041"; exon_number "3"; gene_type " |
| scaffold\Cufflinks\exon | 160782 | 160960 | . | + | . | gene_id "XLOC_289471"; transcript_id "Novel_004041"; exon_number "4"; gene_type " |
| scaffold\Cufflinks\exon | 161082 | 161163 | . | + | . | gene_id "XLOC_289471"; transcript_id "Novel_004041"; exon_number "5"; gene_type " |
| scaffold\Cufflinks\exon | 161444 | 161568 | . | + | . | gene_id "XLOC_289471"; transcript_id "Novel_004041"; exon_number "6"; gene_type " |
| scaffold\Cufflinks\exon | 162484 | 162576 | . | + | . | gene_id "XLOC_289471"; transcript_id "Novel_004041"; exon_number "7"; gene_type " |
| scaffold\Cufflinks\exon | 163498 | 164208 | . | + | . | gene_id "XLOC_289471"; transcript_id "Novel_004041"; exon_number "8"; gene_type " |
| scaffold\Cufflinks\exon | 410861 | 411017 | . | + | . | gene_id "XLOC_289502"; transcript_id "Novel_004042"; exon_number "1"; gene_type " |
| scaffold\Cufflinks\exon | 411103 | 411209 | . | + | . | gene_id "XLOC_289502"; transcript_id "Novel_004042"; exon_number "2"; gene_type " |
| scaffold\Cufflinks\exon | 411306 | 411484 | . | + | . | gene_id "XLOC_289502"; transcript_id "Novel_004042"; exon_number "3"; gene_type " |
| scaffold\Cufflinks\exon | 411573 | 411636 | . | + | . | gene_id "XLOC_289502"; transcript_id "Novel_004042"; exon_number "4"; gene_type " |
| scaffold\Cufflinks\exon | 416119 | 416638 | . | + | . | gene_id "XLOC_289504"; transcript_id "Novel_004043"; exon_number "1"; gene_type " |
| scaffold\Cufflinks\exon | 416737 | 417843 | . | + | . | gene_id "XLOC_289504"; transcript_id "Novel_004043"; exon_number "2"; gene_type " |
| scaffold\Cufflinks\exon | 416119 | 416647 | . | + | . | gene_id "XLOC_289504"; transcript_id "Novel_004044"; exon_number "1"; gene_type " |
| scaffold\Cufflinks\exon | 416737 | 417843 | . | + | . | gene_id "XLOC_289504"; transcript_id "Novel_004044"; exon_number "2"; gene_type " |
| scaffold\Cufflinks\exon | 582055 | 582297 | . | + | . | gene_id "XLOC_289545"; transcript_id "Novel_004045"; exon_number "1"; gene_type " |
| scaffold\Cufflinks\exon | 582396 | 583338 | . | + | . | gene_id "XLOC_289545"; transcript_id "Novel_004045"; exon_number "2"; gene_type " |
| scaffold\Cufflinks\exon | 583473 | 583961 | . | + | . | gene_id "XLOC_289545"; transcript_id "Novel_004045"; exon_number "3"; gene_type " |
| scaffold\Cufflinks\exon | 611890 | 612270 | . | + | . | gene_id "XLOC_289549"; transcript_id "Novel_004046"; exon_number "1"; gene_type " |
| scaffold\Cufflinks\exon | 613838 | 613938 | . | + | . | gene_id "XLOC_289549"; transcript_id "Novel_004046"; exon_number "2"; gene_type " |
| scaffold\Cufflinks\exon | 614383 | 614868 | . | + | . | gene_id "XLOC_289549"; transcript_id "Novel_004046"; exon_number "3"; gene_type " |
| scaffold\Cufflinks\exon | 645630 | 646091 | . | + | . | gene_id "XLOC_289554"; transcript_id "Novel_004047"; exon_number "1"; gene_type " |
| scaffold\Cufflinks\exon | 646360 | 647532 | . | + | . | gene_id "XLOC_289554"; transcript_id "Novel_004047"; exon_number "2"; gene_type " |
| scaffold\Cufflinks\exon | 7      | 418    | . | - | . | gene_id "XLOC_289618"; transcript_id "Novel_004048"; exon_number "1"; gene_type " |
| scaffold\Cufflinks\exon | 504    | 1509   | . | - | . | gene_id "XLOC_289618"; transcript_id "Novel_004048"; exon_number "2"; gene_type " |
| scaffold\Cufflinks\exon | 7      | 418    | . | - | . | gene_id "XLOC_289618"; transcript_id "Novel_004049"; exon_number "1"; gene_type " |
| scaffold\Cufflinks\exon | 504    | 557    | . | - | . | gene_id "XLOC_289618"; transcript_id "Novel_004049"; exon_number "2"; gene_type " |
| scaffold\Cufflinks\exon | 2087   | 2581   | . | - | . | gene_id "XLOC_289618"; transcript_id "Novel_004049"; exon_number "3"; gene_type " |
| scaffold\Cufflinks\exon | 48     | 159    | . | - | . | gene_id "XLOC_289618"; transcript_id "Novel_004050"; exon_number "1"; gene_type " |
| scaffold\Cufflinks\exon | 338    | 418    | . | - | . | gene_id "XLOC_289618"; transcript_id "Novel_004050"; exon_number "2"; gene_type " |
| scaffold\Cufflinks\exon | 504    | 1511   | . | - | . | gene_id "XLOC_289618"; transcript_id "Novel_004050"; exon_number "3"; gene_type " |
| scaffold\Cufflinks\exon | 5232   | 7102   | . | - | . | gene_id "XLOC_289621"; transcript_id "Novel_004051"; exon_number "1"; gene_type " |
| scaffold\Cufflinks\exon | 7316   | 11379  | . | - | . | gene_id "XLOC_289621"; transcript_id "Novel_004051"; exon_number "2"; gene_type " |
| scaffold\Cufflinks\exon | 34013  | 35017  | . | - | . | gene_id "XLOC_289623"; transcript_id "Novel_004052"; exon_number "1"; gene_type " |

|                         |        |        |   |   |                                                                                    |
|-------------------------|--------|--------|---|---|------------------------------------------------------------------------------------|
| scaffold\Cufflinks\exon | 35101  | 35390  | . | . | gene_id "XLOC_289623"; transcript_id "Novel_004052"; exon_number "2"; gene_type "  |
| scaffold\Cufflinks\exon | 34020  | 35017  | . | . | gene_id "XLOC_289623"; transcript_id "Novel_004053"; exon_number "1"; gene_type "  |
| scaffold\Cufflinks\exon | 35101  | 35239  | . | . | gene_id "XLOC_289623"; transcript_id "Novel_004053"; exon_number "2"; gene_type "  |
| scaffold\Cufflinks\exon | 35348  | 35465  | . | . | gene_id "XLOC_289623"; transcript_id "Novel_004053"; exon_number "3"; gene_type "  |
| scaffold\Cufflinks\exon | 119862 | 120202 | . | . | gene_id "XLOC_289641"; transcript_id "Novel_004054"; exon_number "1"; gene_type "  |
| scaffold\Cufflinks\exon | 120305 | 120409 | . | . | gene_id "XLOC_289641"; transcript_id "Novel_004054"; exon_number "2"; gene_type "  |
| scaffold\Cufflinks\exon | 121052 | 121179 | . | . | gene_id "XLOC_289641"; transcript_id "Novel_004054"; exon_number "3"; gene_type "  |
| scaffold\Cufflinks\exon | 121555 | 121669 | . | . | gene_id "XLOC_289641"; transcript_id "Novel_004054"; exon_number "4"; gene_type "  |
| scaffold\Cufflinks\exon | 122117 | 122184 | . | . | gene_id "XLOC_289641"; transcript_id "Novel_004054"; exon_number "5"; gene_type "  |
| scaffold\Cufflinks\exon | 199567 | 200038 | . | . | gene_id "XLOC_289656"; transcript_id "Novel_004055"; exon_number "1"; gene_type "  |
| scaffold\Cufflinks\exon | 200121 | 201022 | . | . | gene_id "XLOC_289656"; transcript_id "Novel_004055"; exon_number "2"; gene_type "  |
| scaffold\Cufflinks\exon | 206552 | 206887 | . | . | gene_id "XLOC_289659"; transcript_id "Novel_004056"; exon_number "1"; gene_type "  |
| scaffold\Cufflinks\exon | 207020 | 207087 | . | . | gene_id "XLOC_289659"; transcript_id "Novel_004056"; exon_number "2"; gene_type "  |
| scaffold\Cufflinks\exon | 207180 | 207286 | . | . | gene_id "XLOC_289659"; transcript_id "Novel_004056"; exon_number "3"; gene_type "  |
| scaffold\Cufflinks\exon | 207377 | 207582 | . | . | gene_id "XLOC_289659"; transcript_id "Novel_004056"; exon_number "4"; gene_type "  |
| scaffold\Cufflinks\exon | 207783 | 207832 | . | . | gene_id "XLOC_289659"; transcript_id "Novel_004056"; exon_number "5"; gene_type "  |
| scaffold\Cufflinks\exon | 207956 | 208043 | . | . | gene_id "XLOC_289659"; transcript_id "Novel_004056"; exon_number "6"; gene_type "  |
| scaffold\Cufflinks\exon | 208184 | 208251 | . | . | gene_id "XLOC_289659"; transcript_id "Novel_004056"; exon_number "7"; gene_type "  |
| scaffold\Cufflinks\exon | 208327 | 208424 | . | . | gene_id "XLOC_289659"; transcript_id "Novel_004056"; exon_number "8"; gene_type "  |
| scaffold\Cufflinks\exon | 208677 | 208819 | . | . | gene_id "XLOC_289659"; transcript_id "Novel_004056"; exon_number "9"; gene_type "  |
| scaffold\Cufflinks\exon | 208924 | 209383 | . | . | gene_id "XLOC_289659"; transcript_id "Novel_004056"; exon_number "10"; gene_type " |
| scaffold\Cufflinks\exon | 209609 | 213129 | . | . | gene_id "XLOC_289659"; transcript_id "Novel_004056"; exon_number "11"; gene_type " |
| scaffold\Cufflinks\exon | 329387 | 329863 | . | . | gene_id "XLOC_289678"; transcript_id "Novel_004057"; exon_number "1"; gene_type "  |
| scaffold\Cufflinks\exon | 330899 | 330999 | . | . | gene_id "XLOC_289678"; transcript_id "Novel_004057"; exon_number "2"; gene_type "  |
| scaffold\Cufflinks\exon | 422971 | 423546 | . | . | gene_id "XLOC_289687"; transcript_id "Novel_004058"; exon_number "1"; gene_type "  |
| scaffold\Cufflinks\exon | 423631 | 425019 | . | . | gene_id "XLOC_289687"; transcript_id "Novel_004058"; exon_number "2"; gene_type "  |
| scaffold\Cufflinks\exon | 26632  | 26936  | . | . | gene_id "XLOC_289874"; transcript_id "Novel_004059"; exon_number "1"; gene_type "  |
| scaffold\Cufflinks\exon | 27015  | 27074  | . | . | gene_id "XLOC_289874"; transcript_id "Novel_004059"; exon_number "2"; gene_type "  |
| scaffold\Cufflinks\exon | 4416   | 4868   | . | . | gene_id "XLOC_289918"; transcript_id "Novel_004060"; exon_number "1"; gene_type "  |
| scaffold\Cufflinks\exon | 13158  | 13158  | . | . | gene_id "XLOC_289947"; transcript_id "Novel_004061"; exon_number "1"; gene_type "  |
| scaffold\Cufflinks\exon | 13241  | 13293  | . | . | gene_id "XLOC_289947"; transcript_id "Novel_004061"; exon_number "2"; gene_type "  |
| scaffold\Cufflinks\exon | 13761  | 14013  | . | . | gene_id "XLOC_289947"; transcript_id "Novel_004061"; exon_number "3"; gene_type "  |
| scaffold\Cufflinks\exon | 105597 | 105851 | . | . | gene_id "XLOC_290084"; transcript_id "Novel_004062"; exon_number "1"; gene_type "  |
| scaffold\Cufflinks\exon | 107716 | 107980 | . | . | gene_id "XLOC_290084"; transcript_id "Novel_004062"; exon_number "2"; gene_type "  |
| scaffold\Cufflinks\exon | 201305 | 201974 | . | . | gene_id "XLOC_290188"; transcript_id "Novel_004063"; exon_number "1"; gene_type "  |

|                         |        |        |   |   |   |                                                                                   |
|-------------------------|--------|--------|---|---|---|-----------------------------------------------------------------------------------|
| scaffold\Cufflinks\exon | 202147 | 202308 | . | - | . | gene_id "XLOC_290188"; transcript_id "Novel_004063"; exon_number "2"; gene_type " |
| scaffold\Cufflinks\exon | 202732 | 202771 | . | - | . | gene_id "XLOC_290188"; transcript_id "Novel_004063"; exon_number "3"; gene_type " |
| scaffold\Cufflinks\exon | 203186 | 203263 | . | - | . | gene_id "XLOC_290188"; transcript_id "Novel_004063"; exon_number "4"; gene_type " |
| scaffold\Cufflinks\exon | 203403 | 203501 | . | - | . | gene_id "XLOC_290188"; transcript_id "Novel_004063"; exon_number "5"; gene_type " |
| scaffold\Cufflinks\exon | 203614 | 203655 | . | - | . | gene_id "XLOC_290188"; transcript_id "Novel_004063"; exon_number "6"; gene_type " |
| scaffold\Cufflinks\exon | 203839 | 203887 | . | - | . | gene_id "XLOC_290188"; transcript_id "Novel_004063"; exon_number "7"; gene_type " |
| scaffold\Cufflinks\exon | 204118 | 204228 | . | - | . | gene_id "XLOC_290188"; transcript_id "Novel_004063"; exon_number "8"; gene_type " |
| scaffold\Cufflinks\exon | 22919  | 23087  | . | + | . | gene_id "XLOC_290276"; transcript_id "Novel_004064"; exon_number "1"; gene_type " |
| scaffold\Cufflinks\exon | 23229  | 23296  | . | + | . | gene_id "XLOC_290276"; transcript_id "Novel_004064"; exon_number "2"; gene_type " |
| scaffold\Cufflinks\exon | 23379  | 23465  | . | + | . | gene_id "XLOC_290276"; transcript_id "Novel_004064"; exon_number "3"; gene_type " |
| scaffold\Cufflinks\exon | 24037  | 24263  | . | + | . | gene_id "XLOC_290276"; transcript_id "Novel_004064"; exon_number "4"; gene_type " |
| scaffold\Cufflinks\exon | 7      | 152    | . | - | . | gene_id "XLOC_290278"; transcript_id "Novel_004065"; exon_number "1"; gene_type " |
| scaffold\Cufflinks\exon | 676    | 835    | . | - | . | gene_id "XLOC_290278"; transcript_id "Novel_004065"; exon_number "2"; gene_type " |
| scaffold\Cufflinks\exon | 7831   | 7910   | . | - | . | gene_id "XLOC_290285"; transcript_id "Novel_004066"; exon_number "1"; gene_type " |
| scaffold\Cufflinks\exon | 8616   | 8738   | . | - | . | gene_id "XLOC_290285"; transcript_id "Novel_004066"; exon_number "2"; gene_type " |
| scaffold\Cufflinks\exon | 8818   | 8856   | . | - | . | gene_id "XLOC_290285"; transcript_id "Novel_004066"; exon_number "3"; gene_type " |
| scaffold\Cufflinks\exon | 8788   | 9144   | . | + | . | gene_id "XLOC_290324"; transcript_id "Novel_004067"; exon_number "1"; gene_type " |
| scaffold\Cufflinks\exon | 12182  | 12236  | . | + | . | gene_id "XLOC_290467"; transcript_id "Novel_004068"; exon_number "1"; gene_type " |
| scaffold\Cufflinks\exon | 14041  | 14370  | . | + | . | gene_id "XLOC_290467"; transcript_id "Novel_004068"; exon_number "2"; gene_type " |
| scaffold\Cufflinks\exon | 21758  | 22135  | . | + | . | gene_id "XLOC_290651"; transcript_id "Novel_004069"; exon_number "1"; gene_type " |
| scaffold\Cufflinks\exon | 22272  | 22410  | . | + | . | gene_id "XLOC_290651"; transcript_id "Novel_004069"; exon_number "2"; gene_type " |
| scaffold\Cufflinks\exon | 22569  | 22671  | . | + | . | gene_id "XLOC_290652"; transcript_id "Novel_004070"; exon_number "1"; gene_type " |
| scaffold\Cufflinks\exon | 22846  | 24201  | . | + | . | gene_id "XLOC_290652"; transcript_id "Novel_004070"; exon_number "2"; gene_type " |
| scaffold\Cufflinks\exon | 14557  | 15411  | . | + | . | gene_id "XLOC_291003"; transcript_id "Novel_004071"; exon_number "1"; gene_type " |
| scaffold\Cufflinks\exon | 8954   | 9209   | . | + | . | gene_id "XLOC_291013"; transcript_id "Novel_004072"; exon_number "1"; gene_type " |
| scaffold\Cufflinks\exon | 11897  | 12103  | . | - | . | gene_id "XLOC_291073"; transcript_id "Novel_004073"; exon_number "1"; gene_type " |
| scaffold\Cufflinks\exon | 12193  | 13302  | . | - | . | gene_id "XLOC_291073"; transcript_id "Novel_004073"; exon_number "2"; gene_type " |
| scaffold\Cufflinks\exon | 7891   | 8143   | . | + | . | gene_id "XLOC_291114"; transcript_id "Novel_004074"; exon_number "1"; gene_type " |
| scaffold\Cufflinks\exon | 501    | 624    | . | - | . | gene_id "XLOC_291141"; transcript_id "Novel_004075"; exon_number "1"; gene_type " |
| scaffold\Cufflinks\exon | 1396   | 1476   | . | - | . | gene_id "XLOC_291141"; transcript_id "Novel_004075"; exon_number "2"; gene_type " |
| scaffold\Cufflinks\exon | 2038   | 2129   | . | - | . | gene_id "XLOC_291141"; transcript_id "Novel_004075"; exon_number "3"; gene_type " |
| scaffold\Cufflinks\exon | 2426   | 2987   | . | - | . | gene_id "XLOC_291141"; transcript_id "Novel_004075"; exon_number "4"; gene_type " |
| scaffold\Cufflinks\exon | 531    | 624    | . | - | . | gene_id "XLOC_291141"; transcript_id "Novel_004076"; exon_number "1"; gene_type " |
| scaffold\Cufflinks\exon | 1396   | 1476   | . | - | . | gene_id "XLOC_291141"; transcript_id "Novel_004076"; exon_number "2"; gene_type " |
| scaffold\Cufflinks\exon | 2038   | 3888   | . | - | . | gene_id "XLOC_291141"; transcript_id "Novel_004076"; exon_number "3"; gene_type " |

|                         |        |        |   |   |   |                                                                                   |
|-------------------------|--------|--------|---|---|---|-----------------------------------------------------------------------------------|
| scaffold\Cufflinks\exon | 750    | 2920   | . | - | . | gene_id "XLOC_291141"; transcript_id "Novel_004077"; exon_number "1"; gene_type " |
| scaffold\Cufflinks\exon | 3381   | 3888   | . | - | . | gene_id "XLOC_291141"; transcript_id "Novel_004077"; exon_number "2"; gene_type " |
| scaffold\Cufflinks\exon | 188747 | 189940 | . | + | . | gene_id "XLOC_291176"; transcript_id "Novel_004078"; exon_number "1"; gene_type " |
| scaffold\Cufflinks\exon | 190045 | 190142 | . | + | . | gene_id "XLOC_291176"; transcript_id "Novel_004078"; exon_number "2"; gene_type " |
| scaffold\Cufflinks\exon | 190364 | 190429 | . | + | . | gene_id "XLOC_291176"; transcript_id "Novel_004078"; exon_number "3"; gene_type " |
| scaffold\Cufflinks\exon | 190506 | 190620 | . | + | . | gene_id "XLOC_291176"; transcript_id "Novel_004078"; exon_number "4"; gene_type " |
| scaffold\Cufflinks\exon | 190810 | 190849 | . | + | . | gene_id "XLOC_291176"; transcript_id "Novel_004078"; exon_number "5"; gene_type " |
| scaffold\Cufflinks\exon | 191179 | 191449 | . | + | . | gene_id "XLOC_291176"; transcript_id "Novel_004078"; exon_number "6"; gene_type " |
| scaffold\Cufflinks\exon | 188918 | 189381 | . | + | . | gene_id "XLOC_291176"; transcript_id "Novel_004079"; exon_number "1"; gene_type " |
| scaffold\Cufflinks\exon | 189895 | 189940 | . | + | . | gene_id "XLOC_291176"; transcript_id "Novel_004079"; exon_number "2"; gene_type " |
| scaffold\Cufflinks\exon | 190045 | 190142 | . | + | . | gene_id "XLOC_291176"; transcript_id "Novel_004079"; exon_number "3"; gene_type " |
| scaffold\Cufflinks\exon | 190364 | 190429 | . | + | . | gene_id "XLOC_291176"; transcript_id "Novel_004079"; exon_number "4"; gene_type " |
| scaffold\Cufflinks\exon | 190506 | 190620 | . | + | . | gene_id "XLOC_291176"; transcript_id "Novel_004079"; exon_number "5"; gene_type " |
| scaffold\Cufflinks\exon | 190810 | 190849 | . | + | . | gene_id "XLOC_291176"; transcript_id "Novel_004079"; exon_number "6"; gene_type " |
| scaffold\Cufflinks\exon | 191179 | 191605 | . | + | . | gene_id "XLOC_291176"; transcript_id "Novel_004079"; exon_number "7"; gene_type " |
| scaffold\Cufflinks\exon | 188919 | 189940 | . | + | . | gene_id "XLOC_291176"; transcript_id "Novel_004080"; exon_number "1"; gene_type " |
| scaffold\Cufflinks\exon | 190045 | 190142 | . | + | . | gene_id "XLOC_291176"; transcript_id "Novel_004080"; exon_number "2"; gene_type " |
| scaffold\Cufflinks\exon | 190364 | 190620 | . | + | . | gene_id "XLOC_291176"; transcript_id "Novel_004080"; exon_number "3"; gene_type " |
| scaffold\Cufflinks\exon | 190810 | 191451 | . | + | . | gene_id "XLOC_291176"; transcript_id "Novel_004080"; exon_number "4"; gene_type " |
| scaffold\Cufflinks\exon | 567724 | 567948 | . | + | . | gene_id "XLOC_291231"; transcript_id "Novel_004081"; exon_number "1"; gene_type " |
| scaffold\Cufflinks\exon | 568125 | 570035 | . | + | . | gene_id "XLOC_291231"; transcript_id "Novel_004081"; exon_number "2"; gene_type " |
| scaffold\Cufflinks\exon | 577449 | 577667 | . | + | . | gene_id "XLOC_291235"; transcript_id "Novel_004082"; exon_number "1"; gene_type " |
| scaffold\Cufflinks\exon | 577748 | 577899 | . | + | . | gene_id "XLOC_291235"; transcript_id "Novel_004082"; exon_number "2"; gene_type " |
| scaffold\Cufflinks\exon | 578007 | 578098 | . | + | . | gene_id "XLOC_291235"; transcript_id "Novel_004082"; exon_number "3"; gene_type " |
| scaffold\Cufflinks\exon | 578446 | 578463 | . | + | . | gene_id "XLOC_291235"; transcript_id "Novel_004082"; exon_number "4"; gene_type " |
| scaffold\Cufflinks\exon | 577449 | 577667 | . | + | . | gene_id "XLOC_291235"; transcript_id "Novel_004083"; exon_number "1"; gene_type " |
| scaffold\Cufflinks\exon | 577742 | 577899 | . | + | . | gene_id "XLOC_291235"; transcript_id "Novel_004083"; exon_number "2"; gene_type " |
| scaffold\Cufflinks\exon | 578007 | 578098 | . | + | . | gene_id "XLOC_291235"; transcript_id "Novel_004083"; exon_number "3"; gene_type " |
| scaffold\Cufflinks\exon | 578446 | 578463 | . | + | . | gene_id "XLOC_291235"; transcript_id "Novel_004083"; exon_number "4"; gene_type " |
| scaffold\Cufflinks\exon | 324198 | 324753 | . | - | . | gene_id "XLOC_291291"; transcript_id "Novel_004084"; exon_number "1"; gene_type " |
| scaffold\Cufflinks\exon | 349303 | 349939 | . | - | . | gene_id "XLOC_291294"; transcript_id "Novel_004085"; exon_number "1"; gene_type " |
| scaffold\Cufflinks\exon | 351945 | 352164 | . | - | . | gene_id "XLOC_291294"; transcript_id "Novel_004085"; exon_number "2"; gene_type " |
| scaffold\Cufflinks\exon | 352336 | 352649 | . | - | . | gene_id "XLOC_291294"; transcript_id "Novel_004085"; exon_number "3"; gene_type " |
| scaffold\Cufflinks\exon | 873777 | 874405 | . | - | . | gene_id "XLOC_291363"; transcript_id "Novel_004086"; exon_number "1"; gene_type " |
| scaffold\Cufflinks\exon | 874501 | 874557 | . | - | . | gene_id "XLOC_291363"; transcript_id "Novel_004086"; exon_number "2"; gene_type " |

|                         |         |         |   |   |   |                                                                                   |
|-------------------------|---------|---------|---|---|---|-----------------------------------------------------------------------------------|
| scaffold\Cufflinks\exon | 875525  | 875600  | . | - | . | gene_id "XLOC_291363"; transcript_id "Novel_004086"; exon_number "3"; gene_type " |
| scaffold\Cufflinks\exon | 875743  | 876608  | . | - | . | gene_id "XLOC_291363"; transcript_id "Novel_004086"; exon_number "4"; gene_type " |
| scaffold\Cufflinks\exon | 876741  | 876878  | . | - | . | gene_id "XLOC_291363"; transcript_id "Novel_004086"; exon_number "5"; gene_type " |
| scaffold\Cufflinks\exon | 876968  | 877177  | . | - | . | gene_id "XLOC_291363"; transcript_id "Novel_004086"; exon_number "6"; gene_type " |
| scaffold\Cufflinks\exon | 877813  | 877962  | . | - | . | gene_id "XLOC_291363"; transcript_id "Novel_004086"; exon_number "7"; gene_type " |
| scaffold\Cufflinks\exon | 876589  | 877177  | . | - | . | gene_id "XLOC_291363"; transcript_id "Novel_004087"; exon_number "1"; gene_type " |
| scaffold\Cufflinks\exon | 877813  | 877990  | . | - | . | gene_id "XLOC_291363"; transcript_id "Novel_004087"; exon_number "2"; gene_type " |
| scaffold\Cufflinks\exon | 1214094 | 1214154 | . | + | . | gene_id "XLOC_291523"; transcript_id "Novel_004088"; exon_number "1"; gene_type " |
| scaffold\Cufflinks\exon | 1214578 | 1214695 | . | + | . | gene_id "XLOC_291523"; transcript_id "Novel_004088"; exon_number "2"; gene_type " |
| scaffold\Cufflinks\exon | 1215597 | 1215669 | . | + | . | gene_id "XLOC_291523"; transcript_id "Novel_004088"; exon_number "3"; gene_type " |
| scaffold\Cufflinks\exon | 1216963 | 1217309 | . | + | . | gene_id "XLOC_291523"; transcript_id "Novel_004088"; exon_number "4"; gene_type " |
| scaffold\Cufflinks\exon | 1457418 | 1457581 | . | + | . | gene_id "XLOC_291544"; transcript_id "Novel_004089"; exon_number "1"; gene_type " |
| scaffold\Cufflinks\exon | 1458307 | 1458745 | . | + | . | gene_id "XLOC_291544"; transcript_id "Novel_004089"; exon_number "2"; gene_type " |
| scaffold\Cufflinks\exon | 523440  | 523801  | . | - | . | gene_id "XLOC_291732"; transcript_id "Novel_004090"; exon_number "1"; gene_type " |
| scaffold\Cufflinks\exon | 523877  | 524129  | . | - | . | gene_id "XLOC_291732"; transcript_id "Novel_004090"; exon_number "2"; gene_type " |
| scaffold\Cufflinks\exon | 524227  | 524469  | . | - | . | gene_id "XLOC_291732"; transcript_id "Novel_004090"; exon_number "3"; gene_type " |
| scaffold\Cufflinks\exon | 524540  | 524637  | . | - | . | gene_id "XLOC_291732"; transcript_id "Novel_004090"; exon_number "4"; gene_type " |
| scaffold\Cufflinks\exon | 17650   | 18545   | . | - | . | gene_id "XLOC_292089"; transcript_id "Novel_004091"; exon_number "1"; gene_type " |
| scaffold\Cufflinks\exon | 20098   | 20525   | . | - | . | gene_id "XLOC_292089"; transcript_id "Novel_004091"; exon_number "2"; gene_type " |
| scaffold\Cufflinks\exon | 8134    | 9328    | . | - | . | gene_id "XLOC_292218"; transcript_id "Novel_004092"; exon_number "1"; gene_type " |
| scaffold\Cufflinks\exon | 9425    | 9500    | . | - | . | gene_id "XLOC_292218"; transcript_id "Novel_004092"; exon_number "2"; gene_type " |
| scaffold\Cufflinks\exon | 45634   | 46070   | . | + | . | gene_id "XLOC_292308"; transcript_id "Novel_004093"; exon_number "1"; gene_type " |
| scaffold\Cufflinks\exon | 55549   | 56308   | . | + | . | gene_id "XLOC_292308"; transcript_id "Novel_004093"; exon_number "2"; gene_type " |
| scaffold\Cufflinks\exon | 45654   | 46070   | . | + | . | gene_id "XLOC_292308"; transcript_id "Novel_004094"; exon_number "1"; gene_type " |
| scaffold\Cufflinks\exon | 46281   | 47353   | . | + | . | gene_id "XLOC_292308"; transcript_id "Novel_004094"; exon_number "2"; gene_type " |
| scaffold\Cufflinks\exon | 230377  | 231596  | . | + | . | gene_id "XLOC_292350"; transcript_id "Novel_004095"; exon_number "1"; gene_type " |
| scaffold\Cufflinks\exon | 231695  | 231743  | . | + | . | gene_id "XLOC_292350"; transcript_id "Novel_004095"; exon_number "2"; gene_type " |
| scaffold\Cufflinks\exon | 232833  | 232894  | . | + | . | gene_id "XLOC_292350"; transcript_id "Novel_004095"; exon_number "3"; gene_type " |
| scaffold\Cufflinks\exon | 232996  | 233065  | . | + | . | gene_id "XLOC_292350"; transcript_id "Novel_004095"; exon_number "4"; gene_type " |
| scaffold\Cufflinks\exon | 233514  | 233591  | . | + | . | gene_id "XLOC_292350"; transcript_id "Novel_004095"; exon_number "5"; gene_type " |
| scaffold\Cufflinks\exon | 233666  | 233781  | . | + | . | gene_id "XLOC_292350"; transcript_id "Novel_004095"; exon_number "6"; gene_type " |
| scaffold\Cufflinks\exon | 233883  | 233948  | . | + | . | gene_id "XLOC_292350"; transcript_id "Novel_004095"; exon_number "7"; gene_type " |
| scaffold\Cufflinks\exon | 234032  | 234162  | . | + | . | gene_id "XLOC_292350"; transcript_id "Novel_004095"; exon_number "8"; gene_type " |
| scaffold\Cufflinks\exon | 234407  | 235063  | . | + | . | gene_id "XLOC_292350"; transcript_id "Novel_004095"; exon_number "9"; gene_type " |
| scaffold\Cufflinks\exon | 469522  | 469642  | . | + | . | gene_id "XLOC_292405"; transcript_id "Novel_004096"; exon_number "1"; gene_type " |

|                         |        |        |   |   |   |                                                                                    |
|-------------------------|--------|--------|---|---|---|------------------------------------------------------------------------------------|
| scaffold\Cufflinks\exon | 470696 | 470786 | . | + | . | gene_id "XLOC_292405"; transcript_id "Novel_004096"; exon_number "2"; gene_type "  |
| scaffold\Cufflinks\exon | 470928 | 471111 | . | + | . | gene_id "XLOC_292405"; transcript_id "Novel_004096"; exon_number "3"; gene_type "  |
| scaffold\Cufflinks\exon | 472074 | 472560 | . | + | . | gene_id "XLOC_292405"; transcript_id "Novel_004096"; exon_number "4"; gene_type "  |
| scaffold\Cufflinks\exon | 538500 | 538665 | . | + | . | gene_id "XLOC_292430"; transcript_id "Novel_004097"; exon_number "1"; gene_type "  |
| scaffold\Cufflinks\exon | 539134 | 539480 | . | + | . | gene_id "XLOC_292430"; transcript_id "Novel_004097"; exon_number "2"; gene_type "  |
| scaffold\Cufflinks\exon | 539570 | 543350 | . | + | . | gene_id "XLOC_292430"; transcript_id "Novel_004097"; exon_number "3"; gene_type "  |
| scaffold\Cufflinks\exon | 538508 | 538665 | . | + | . | gene_id "XLOC_292430"; transcript_id "Novel_004098"; exon_number "1"; gene_type "  |
| scaffold\Cufflinks\exon | 539134 | 539480 | . | + | . | gene_id "XLOC_292430"; transcript_id "Novel_004098"; exon_number "2"; gene_type "  |
| scaffold\Cufflinks\exon | 539570 | 541496 | . | + | . | gene_id "XLOC_292430"; transcript_id "Novel_004098"; exon_number "3"; gene_type "  |
| scaffold\Cufflinks\exon | 543027 | 543438 | . | + | . | gene_id "XLOC_292430"; transcript_id "Novel_004098"; exon_number "4"; gene_type "  |
| scaffold\Cufflinks\exon | 539086 | 539480 | . | + | . | gene_id "XLOC_292430"; transcript_id "Novel_004099"; exon_number "1"; gene_type "  |
| scaffold\Cufflinks\exon | 539570 | 541496 | . | + | . | gene_id "XLOC_292430"; transcript_id "Novel_004099"; exon_number "2"; gene_type "  |
| scaffold\Cufflinks\exon | 543027 | 543350 | . | + | . | gene_id "XLOC_292430"; transcript_id "Novel_004099"; exon_number "3"; gene_type "  |
| scaffold\Cufflinks\exon | 817674 | 818000 | . | + | . | gene_id "XLOC_292467"; transcript_id "Novel_004100"; exon_number "1"; gene_type "  |
| scaffold\Cufflinks\exon | 818173 | 818235 | . | + | . | gene_id "XLOC_292467"; transcript_id "Novel_004100"; exon_number "2"; gene_type "  |
| scaffold\Cufflinks\exon | 818502 | 818604 | . | + | . | gene_id "XLOC_292467"; transcript_id "Novel_004100"; exon_number "3"; gene_type "  |
| scaffold\Cufflinks\exon | 818693 | 818836 | . | + | . | gene_id "XLOC_292467"; transcript_id "Novel_004100"; exon_number "4"; gene_type "  |
| scaffold\Cufflinks\exon | 818941 | 819044 | . | + | . | gene_id "XLOC_292467"; transcript_id "Novel_004100"; exon_number "5"; gene_type "  |
| scaffold\Cufflinks\exon | 819152 | 819250 | . | + | . | gene_id "XLOC_292467"; transcript_id "Novel_004100"; exon_number "6"; gene_type "  |
| scaffold\Cufflinks\exon | 819349 | 819418 | . | + | . | gene_id "XLOC_292467"; transcript_id "Novel_004100"; exon_number "7"; gene_type "  |
| scaffold\Cufflinks\exon | 819502 | 819598 | . | + | . | gene_id "XLOC_292467"; transcript_id "Novel_004100"; exon_number "8"; gene_type "  |
| scaffold\Cufflinks\exon | 819832 | 819886 | . | + | . | gene_id "XLOC_292467"; transcript_id "Novel_004100"; exon_number "9"; gene_type "  |
| scaffold\Cufflinks\exon | 820457 | 820540 | . | + | . | gene_id "XLOC_292467"; transcript_id "Novel_004100"; exon_number "10"; gene_type " |
| scaffold\Cufflinks\exon | 820769 | 820846 | . | + | . | gene_id "XLOC_292467"; transcript_id "Novel_004100"; exon_number "11"; gene_type " |
| scaffold\Cufflinks\exon | 820938 | 821041 | . | + | . | gene_id "XLOC_292467"; transcript_id "Novel_004100"; exon_number "12"; gene_type " |
| scaffold\Cufflinks\exon | 821124 | 821296 | . | + | . | gene_id "XLOC_292467"; transcript_id "Novel_004100"; exon_number "13"; gene_type " |
| scaffold\Cufflinks\exon | 821372 | 821523 | . | + | . | gene_id "XLOC_292467"; transcript_id "Novel_004100"; exon_number "14"; gene_type " |
| scaffold\Cufflinks\exon | 821611 | 822106 | . | + | . | gene_id "XLOC_292467"; transcript_id "Novel_004100"; exon_number "15"; gene_type " |
| scaffold\Cufflinks\exon | 193495 | 193846 | . | - | . | gene_id "XLOC_292542"; transcript_id "Novel_004101"; exon_number "1"; gene_type "  |
| scaffold\Cufflinks\exon | 194077 | 194575 | . | - | . | gene_id "XLOC_292542"; transcript_id "Novel_004101"; exon_number "2"; gene_type "  |
| scaffold\Cufflinks\exon | 193497 | 193846 | . | - | . | gene_id "XLOC_292542"; transcript_id "Novel_004102"; exon_number "1"; gene_type "  |
| scaffold\Cufflinks\exon | 194077 | 194180 | . | - | . | gene_id "XLOC_292542"; transcript_id "Novel_004102"; exon_number "2"; gene_type "  |
| scaffold\Cufflinks\exon | 194569 | 194607 | . | - | . | gene_id "XLOC_292542"; transcript_id "Novel_004102"; exon_number "3"; gene_type "  |
| scaffold\Cufflinks\exon | 6207   | 7171   | . | - | . | gene_id "XLOC_292666"; transcript_id "Novel_004103"; exon_number "1"; gene_type "  |
| scaffold\Cufflinks\exon | 7418   | 7533   | . | - | . | gene_id "XLOC_292666"; transcript_id "Novel_004103"; exon_number "2"; gene_type "  |

|                    |      |        |        |   |   |   |         |                |               |                 |             |      |           |   |
|--------------------|------|--------|--------|---|---|---|---------|----------------|---------------|-----------------|-------------|------|-----------|---|
| scaffold5Cufflinks | exon | 8985   | 9132   | . | - | . | gene_id | "XLOC_292803"; | transcript_id | "Novel_004104"; | exon_number | "1"; | gene_type | " |
| scaffold5Cufflinks | exon | 9243   | 9329   | . | - | . | gene_id | "XLOC_292803"; | transcript_id | "Novel_004104"; | exon_number | "2"; | gene_type | " |
| scaffold5Cufflinks | exon | 15464  | 15722  | . | - | . | gene_id | "XLOC_292896"; | transcript_id | "Novel_004105"; | exon_number | "1"; | gene_type | " |
| scaffold5Cufflinks | exon | 297    | 325    | . | + | . | gene_id | "XLOC_293000"; | transcript_id | "Novel_004106"; | exon_number | "1"; | gene_type | " |
| scaffold5Cufflinks | exon | 510    | 645    | . | + | . | gene_id | "XLOC_293000"; | transcript_id | "Novel_004106"; | exon_number | "2"; | gene_type | " |
| scaffold5Cufflinks | exon | 1120   | 1194   | . | + | . | gene_id | "XLOC_293000"; | transcript_id | "Novel_004106"; | exon_number | "3"; | gene_type | " |
| scaffold5Cufflinks | exon | 1322   | 1356   | . | + | . | gene_id | "XLOC_293000"; | transcript_id | "Novel_004106"; | exon_number | "4"; | gene_type | " |
| scaffold5Cufflinks | exon | 291190 | 291390 | . | + | . | gene_id | "XLOC_293355"; | transcript_id | "Novel_004107"; | exon_number | "1"; | gene_type | " |
| scaffold5Cufflinks | exon | 103923 | 104146 | . | - | . | gene_id | "XLOC_293443"; | transcript_id | "Novel_004108"; | exon_number | "1"; | gene_type | " |
| scaffold5Cufflinks | exon | 104296 | 104590 | . | - | . | gene_id | "XLOC_293443"; | transcript_id | "Novel_004108"; | exon_number | "2"; | gene_type | " |
| scaffold5Cufflinks | exon | 105031 | 105103 | . | - | . | gene_id | "XLOC_293443"; | transcript_id | "Novel_004108"; | exon_number | "3"; | gene_type | " |
| scaffold5Cufflinks | exon | 105187 | 105315 | . | - | . | gene_id | "XLOC_293443"; | transcript_id | "Novel_004108"; | exon_number | "4"; | gene_type | " |
| scaffold5Cufflinks | exon | 106563 | 106761 | . | - | . | gene_id | "XLOC_293443"; | transcript_id | "Novel_004108"; | exon_number | "5"; | gene_type | " |
| scaffold5Cufflinks | exon | 104276 | 104590 | . | - | . | gene_id | "XLOC_293443"; | transcript_id | "Novel_004109"; | exon_number | "1"; | gene_type | " |
| scaffold5Cufflinks | exon | 105031 | 105103 | . | - | . | gene_id | "XLOC_293443"; | transcript_id | "Novel_004109"; | exon_number | "2"; | gene_type | " |
| scaffold5Cufflinks | exon | 105187 | 105315 | . | - | . | gene_id | "XLOC_293443"; | transcript_id | "Novel_004109"; | exon_number | "3"; | gene_type | " |
| scaffold5Cufflinks | exon | 106563 | 106769 | . | - | . | gene_id | "XLOC_293443"; | transcript_id | "Novel_004109"; | exon_number | "4"; | gene_type | " |
| scaffold6Cufflinks | exon | 290238 | 290659 | . | - | . | gene_id | "XLOC_293826"; | transcript_id | "Novel_004110"; | exon_number | "1"; | gene_type | " |
| scaffold6Cufflinks | exon | 290821 | 291038 | . | - | . | gene_id | "XLOC_293826"; | transcript_id | "Novel_004110"; | exon_number | "2"; | gene_type | " |
| scaffold6Cufflinks | exon | 831764 | 832365 | . | - | . | gene_id | "XLOC_293858"; | transcript_id | "Novel_004111"; | exon_number | "1"; | gene_type | " |
| scaffold6Cufflinks | exon | 832449 | 832652 | . | - | . | gene_id | "XLOC_293858"; | transcript_id | "Novel_004111"; | exon_number | "2"; | gene_type | " |
| scaffold6Cufflinks | exon | 832746 | 832958 | . | - | . | gene_id | "XLOC_293858"; | transcript_id | "Novel_004111"; | exon_number | "3"; | gene_type | " |
| scaffold6Cufflinks | exon | 833058 | 833106 | . | - | . | gene_id | "XLOC_293858"; | transcript_id | "Novel_004111"; | exon_number | "4"; | gene_type | " |
| scaffold6Cufflinks | exon | 833275 | 833361 | . | - | . | gene_id | "XLOC_293858"; | transcript_id | "Novel_004111"; | exon_number | "5"; | gene_type | " |
| scaffold6Cufflinks | exon | 831942 | 832365 | . | - | . | gene_id | "XLOC_293858"; | transcript_id | "Novel_004112"; | exon_number | "1"; | gene_type | " |
| scaffold6Cufflinks | exon | 832449 | 832652 | . | - | . | gene_id | "XLOC_293858"; | transcript_id | "Novel_004112"; | exon_number | "2"; | gene_type | " |
| scaffold6Cufflinks | exon | 832746 | 832958 | . | - | . | gene_id | "XLOC_293858"; | transcript_id | "Novel_004112"; | exon_number | "3"; | gene_type | " |
| scaffold6Cufflinks | exon | 833058 | 833258 | . | - | . | gene_id | "XLOC_293858"; | transcript_id | "Novel_004112"; | exon_number | "4"; | gene_type | " |
| scaffold6Cufflinks | exon | 833532 | 833653 | . | - | . | gene_id | "XLOC_293858"; | transcript_id | "Novel_004113"; | exon_number | "1"; | gene_type | " |
| scaffold6Cufflinks | exon | 833741 | 833897 | . | - | . | gene_id | "XLOC_293858"; | transcript_id | "Novel_004113"; | exon_number | "2"; | gene_type | " |
| scaffold6Cufflinks | exon | 835182 | 835346 | . | - | . | gene_id | "XLOC_293858"; | transcript_id | "Novel_004113"; | exon_number | "3"; | gene_type | " |
| scaffold6Cufflinks | exon | 835425 | 835763 | . | - | . | gene_id | "XLOC_293858"; | transcript_id | "Novel_004113"; | exon_number | "4"; | gene_type | " |
| scaffold6Cufflinks | exon | 834981 | 835346 | . | - | . | gene_id | "XLOC_293858"; | transcript_id | "Novel_004114"; | exon_number | "1"; | gene_type | " |
| scaffold6Cufflinks | exon | 835425 | 835759 | . | - | . | gene_id | "XLOC_293858"; | transcript_id | "Novel_004114"; | exon_number | "2"; | gene_type | " |
| scaffold6Cufflinks | exon | 589630 | 590210 | . | + | . | gene_id | "XLOC_294548"; | transcript_id | "Novel_004115"; | exon_number | "1"; | gene_type | " |



|                         |        |        |   |   |   |                                                                                   |
|-------------------------|--------|--------|---|---|---|-----------------------------------------------------------------------------------|
| scaffold\Cufflinks\exon | 590308 | 590458 | . | + | . | gene_id "XLOC_294548"; transcript_id "Novel_004115"; exon_number "2"; gene_type " |
| scaffold\Cufflinks\exon | 420824 | 424095 | . | - | . | gene_id "XLOC_294664"; transcript_id "Novel_004116"; exon_number "1"; gene_type " |
| scaffold\Cufflinks\exon | 424212 | 424280 | . | - | . | gene_id "XLOC_294664"; transcript_id "Novel_004116"; exon_number "2"; gene_type " |
| scaffold\Cufflinks\exon | 424950 | 425036 | . | - | . | gene_id "XLOC_294664"; transcript_id "Novel_004116"; exon_number "3"; gene_type " |
| scaffold\Cufflinks\exon | 425249 | 425646 | . | - | . | gene_id "XLOC_294664"; transcript_id "Novel_004116"; exon_number "4"; gene_type " |
| scaffold\Cufflinks\exon | 423087 | 424095 | . | - | . | gene_id "XLOC_294664"; transcript_id "Novel_004117"; exon_number "1"; gene_type " |
| scaffold\Cufflinks\exon | 424212 | 424876 | . | - | . | gene_id "XLOC_294664"; transcript_id "Novel_004117"; exon_number "2"; gene_type " |
| scaffold\Cufflinks\exon | 424950 | 425036 | . | - | . | gene_id "XLOC_294664"; transcript_id "Novel_004117"; exon_number "3"; gene_type " |
| scaffold\Cufflinks\exon | 425249 | 425653 | . | - | . | gene_id "XLOC_294664"; transcript_id "Novel_004117"; exon_number "4"; gene_type " |
| scaffold\Cufflinks\exon | 424369 | 425036 | . | - | . | gene_id "XLOC_294664"; transcript_id "Novel_004118"; exon_number "1"; gene_type " |
| scaffold\Cufflinks\exon | 425249 | 425556 | . | - | . | gene_id "XLOC_294664"; transcript_id "Novel_004118"; exon_number "2"; gene_type " |
| scaffold\Cufflinks\exon | 145915 | 151490 | . | + | . | gene_id "XLOC_294888"; transcript_id "Novel_004119"; exon_number "1"; gene_type " |
| scaffold\Cufflinks\exon | 152107 | 152971 | . | + | . | gene_id "XLOC_294888"; transcript_id "Novel_004119"; exon_number "2"; gene_type " |
| scaffold\Cufflinks\exon | 166001 | 166187 | . | + | . | gene_id "XLOC_294891"; transcript_id "Novel_004120"; exon_number "1"; gene_type " |
| scaffold\Cufflinks\exon | 166317 | 166433 | . | + | . | gene_id "XLOC_294891"; transcript_id "Novel_004120"; exon_number "2"; gene_type " |
| scaffold\Cufflinks\exon | 166833 | 166934 | . | + | . | gene_id "XLOC_294891"; transcript_id "Novel_004120"; exon_number "3"; gene_type " |
| scaffold\Cufflinks\exon | 167210 | 167308 | . | + | . | gene_id "XLOC_294891"; transcript_id "Novel_004120"; exon_number "4"; gene_type " |
| scaffold\Cufflinks\exon | 167542 | 168234 | . | + | . | gene_id "XLOC_294891"; transcript_id "Novel_004120"; exon_number "5"; gene_type " |
| scaffold\Cufflinks\exon | 489916 | 490246 | . | + | . | gene_id "XLOC_294938"; transcript_id "Novel_004121"; exon_number "1"; gene_type " |
| scaffold\Cufflinks\exon | 490332 | 490400 | . | + | . | gene_id "XLOC_294938"; transcript_id "Novel_004121"; exon_number "2"; gene_type " |
| scaffold\Cufflinks\exon | 491314 | 491370 | . | + | . | gene_id "XLOC_294938"; transcript_id "Novel_004121"; exon_number "3"; gene_type " |
| scaffold\Cufflinks\exon | 491472 | 491511 | . | + | . | gene_id "XLOC_294938"; transcript_id "Novel_004121"; exon_number "4"; gene_type " |
| scaffold\Cufflinks\exon | 491699 | 491791 | . | + | . | gene_id "XLOC_294938"; transcript_id "Novel_004121"; exon_number "5"; gene_type " |
| scaffold\Cufflinks\exon | 492129 | 492344 | . | + | . | gene_id "XLOC_294938"; transcript_id "Novel_004121"; exon_number "6"; gene_type " |
| scaffold\Cufflinks\exon | 492655 | 492697 | . | + | . | gene_id "XLOC_294938"; transcript_id "Novel_004121"; exon_number "7"; gene_type " |
| scaffold\Cufflinks\exon | 492877 | 492955 | . | + | . | gene_id "XLOC_294938"; transcript_id "Novel_004121"; exon_number "8"; gene_type " |
| scaffold\Cufflinks\exon | 493060 | 493886 | . | + | . | gene_id "XLOC_294938"; transcript_id "Novel_004121"; exon_number "9"; gene_type " |
| scaffold\Cufflinks\exon | 489928 | 490246 | . | + | . | gene_id "XLOC_294938"; transcript_id "Novel_004122"; exon_number "1"; gene_type " |
| scaffold\Cufflinks\exon | 490332 | 490400 | . | + | . | gene_id "XLOC_294938"; transcript_id "Novel_004122"; exon_number "2"; gene_type " |
| scaffold\Cufflinks\exon | 491314 | 491370 | . | + | . | gene_id "XLOC_294938"; transcript_id "Novel_004122"; exon_number "3"; gene_type " |
| scaffold\Cufflinks\exon | 491472 | 491511 | . | + | . | gene_id "XLOC_294938"; transcript_id "Novel_004122"; exon_number "4"; gene_type " |
| scaffold\Cufflinks\exon | 491699 | 492012 | . | + | . | gene_id "XLOC_294938"; transcript_id "Novel_004122"; exon_number "5"; gene_type " |
| scaffold\Cufflinks\exon | 140686 | 141318 | . | - | . | gene_id "XLOC_294983"; transcript_id "Novel_004123"; exon_number "1"; gene_type " |
| scaffold\Cufflinks\exon | 141742 | 141826 | . | - | . | gene_id "XLOC_294983"; transcript_id "Novel_004123"; exon_number "2"; gene_type " |
| scaffold\Cufflinks\exon | 141931 | 142018 | . | - | . | gene_id "XLOC_294983"; transcript_id "Novel_004123"; exon_number "3"; gene_type " |

|                         |        |        |   |   |   |         |                |               |                 |             |      |           |   |
|-------------------------|--------|--------|---|---|---|---------|----------------|---------------|-----------------|-------------|------|-----------|---|
| scaffold\Cufflinks\exon | 142485 | 142548 | . | - | . | gene_id | "XLOC_294983"; | transcript_id | "Novel_004123"; | exon_number | "4"; | gene_type | " |
| scaffold\Cufflinks\exon | 142706 | 142786 | . | - | . | gene_id | "XLOC_294983"; | transcript_id | "Novel_004123"; | exon_number | "5"; | gene_type | " |
| scaffold\Cufflinks\exon | 142915 | 143672 | . | - | . | gene_id | "XLOC_294983"; | transcript_id | "Novel_004123"; | exon_number | "6"; | gene_type | " |
| scaffold\Cufflinks\exon | 144202 | 144517 | . | - | . | gene_id | "XLOC_294983"; | transcript_id | "Novel_004123"; | exon_number | "7"; | gene_type | " |
| scaffold\Cufflinks\exon | 140846 | 141318 | . | - | . | gene_id | "XLOC_294983"; | transcript_id | "Novel_004124"; | exon_number | "1"; | gene_type | " |
| scaffold\Cufflinks\exon | 141742 | 141826 | . | - | . | gene_id | "XLOC_294983"; | transcript_id | "Novel_004124"; | exon_number | "2"; | gene_type | " |
| scaffold\Cufflinks\exon | 141931 | 142018 | . | - | . | gene_id | "XLOC_294983"; | transcript_id | "Novel_004124"; | exon_number | "3"; | gene_type | " |
| scaffold\Cufflinks\exon | 142485 | 142548 | . | - | . | gene_id | "XLOC_294983"; | transcript_id | "Novel_004124"; | exon_number | "4"; | gene_type | " |
| scaffold\Cufflinks\exon | 142706 | 142786 | . | - | . | gene_id | "XLOC_294983"; | transcript_id | "Novel_004124"; | exon_number | "5"; | gene_type | " |
| scaffold\Cufflinks\exon | 142915 | 142987 | . | - | . | gene_id | "XLOC_294983"; | transcript_id | "Novel_004124"; | exon_number | "6"; | gene_type | " |
| scaffold\Cufflinks\exon | 143068 | 143672 | . | - | . | gene_id | "XLOC_294983"; | transcript_id | "Novel_004124"; | exon_number | "7"; | gene_type | " |
| scaffold\Cufflinks\exon | 144202 | 144515 | . | - | . | gene_id | "XLOC_294983"; | transcript_id | "Novel_004124"; | exon_number | "8"; | gene_type | " |
| scaffold\Cufflinks\exon | 3      | 207    | . | + | . | gene_id | "XLOC_295161"; | transcript_id | "Novel_004125"; | exon_number | "1"; | gene_type | " |
| scaffold\Cufflinks\exon | 736700 | 736834 | . | + | . | gene_id | "XLOC_295467"; | transcript_id | "Novel_004126"; | exon_number | "1"; | gene_type | " |
| scaffold\Cufflinks\exon | 736917 | 736985 | . | + | . | gene_id | "XLOC_295467"; | transcript_id | "Novel_004126"; | exon_number | "2"; | gene_type | " |
| scaffold\Cufflinks\exon | 737181 | 737269 | . | + | . | gene_id | "XLOC_295467"; | transcript_id | "Novel_004126"; | exon_number | "3"; | gene_type | " |
| scaffold\Cufflinks\exon | 738148 | 738267 | . | + | . | gene_id | "XLOC_295467"; | transcript_id | "Novel_004126"; | exon_number | "4"; | gene_type | " |
| scaffold\Cufflinks\exon | 738355 | 738399 | . | + | . | gene_id | "XLOC_295467"; | transcript_id | "Novel_004126"; | exon_number | "5"; | gene_type | " |
| scaffold\Cufflinks\exon | 738489 | 738864 | . | + | . | gene_id | "XLOC_295467"; | transcript_id | "Novel_004126"; | exon_number | "6"; | gene_type | " |
| scaffold\Cufflinks\exon | 196883 | 197529 | . | - | . | gene_id | "XLOC_295524"; | transcript_id | "Novel_004127"; | exon_number | "1"; | gene_type | " |
| scaffold\Cufflinks\exon | 6701   | 7489   | . | - | . | gene_id | "XLOC_295738"; | transcript_id | "Novel_004128"; | exon_number | "1"; | gene_type | " |
| scaffold\Cufflinks\exon | 7579   | 7776   | . | - | . | gene_id | "XLOC_295738"; | transcript_id | "Novel_004128"; | exon_number | "2"; | gene_type | " |
| scaffold\Cufflinks\exon | 7861   | 8088   | . | - | . | gene_id | "XLOC_295738"; | transcript_id | "Novel_004128"; | exon_number | "3"; | gene_type | " |
| scaffold\Cufflinks\exon | 8191   | 8525   | . | - | . | gene_id | "XLOC_295738"; | transcript_id | "Novel_004128"; | exon_number | "4"; | gene_type | " |
| scaffold\Cufflinks\exon | 8630   | 8833   | . | - | . | gene_id | "XLOC_295738"; | transcript_id | "Novel_004128"; | exon_number | "5"; | gene_type | " |
| scaffold\Cufflinks\exon | 8932   | 9020   | . | - | . | gene_id | "XLOC_295738"; | transcript_id | "Novel_004128"; | exon_number | "6"; | gene_type | " |
| scaffold\Cufflinks\exon | 9146   | 9216   | . | - | . | gene_id | "XLOC_295738"; | transcript_id | "Novel_004128"; | exon_number | "7"; | gene_type | " |
| scaffold\Cufflinks\exon | 9353   | 9437   | . | - | . | gene_id | "XLOC_295738"; | transcript_id | "Novel_004128"; | exon_number | "8"; | gene_type | " |
| scaffold\Cufflinks\exon | 9547   | 9610   | . | - | . | gene_id | "XLOC_295738"; | transcript_id | "Novel_004128"; | exon_number | "9"; | gene_type | " |
| scaffold\Cufflinks\exon | 7452   | 7489   | . | - | . | gene_id | "XLOC_295738"; | transcript_id | "Novel_004129"; | exon_number | "1"; | gene_type | " |
| scaffold\Cufflinks\exon | 7579   | 7776   | . | - | . | gene_id | "XLOC_295738"; | transcript_id | "Novel_004129"; | exon_number | "2"; | gene_type | " |
| scaffold\Cufflinks\exon | 7861   | 8088   | . | - | . | gene_id | "XLOC_295738"; | transcript_id | "Novel_004129"; | exon_number | "3"; | gene_type | " |
| scaffold\Cufflinks\exon | 8191   | 8525   | . | - | . | gene_id | "XLOC_295738"; | transcript_id | "Novel_004129"; | exon_number | "4"; | gene_type | " |
| scaffold\Cufflinks\exon | 8630   | 9020   | . | - | . | gene_id | "XLOC_295738"; | transcript_id | "Novel_004129"; | exon_number | "5"; | gene_type | " |
| scaffold\Cufflinks\exon | 9146   | 9216   | . | - | . | gene_id | "XLOC_295738"; | transcript_id | "Novel_004129"; | exon_number | "6"; | gene_type | " |

|                         |        |        |   |   |                                                                                   |
|-------------------------|--------|--------|---|---|-----------------------------------------------------------------------------------|
| scaffold{Cufflinks}exon | 9353   | 9437   | . | . | gene_id "XLOC_295738"; transcript_id "Novel_004129"; exon_number "7"; gene_type " |
| scaffold{Cufflinks}exon | 9547   | 9734   | . | . | gene_id "XLOC_295738"; transcript_id "Novel_004129"; exon_number "8"; gene_type " |
| scaffold{Cufflinks}exon | 7452   | 7489   | . | . | gene_id "XLOC_295738"; transcript_id "Novel_004130"; exon_number "1"; gene_type " |
| scaffold{Cufflinks}exon | 7579   | 7776   | . | . | gene_id "XLOC_295738"; transcript_id "Novel_004130"; exon_number "2"; gene_type " |
| scaffold{Cufflinks}exon | 7861   | 8088   | . | . | gene_id "XLOC_295738"; transcript_id "Novel_004130"; exon_number "3"; gene_type " |
| scaffold{Cufflinks}exon | 8191   | 8525   | . | . | gene_id "XLOC_295738"; transcript_id "Novel_004130"; exon_number "4"; gene_type " |
| scaffold{Cufflinks}exon | 8630   | 8784   | . | . | gene_id "XLOC_295738"; transcript_id "Novel_004130"; exon_number "5"; gene_type " |
| scaffold{Cufflinks}exon | 8932   | 9020   | . | . | gene_id "XLOC_295738"; transcript_id "Novel_004130"; exon_number "6"; gene_type " |
| scaffold{Cufflinks}exon | 9146   | 9216   | . | . | gene_id "XLOC_295738"; transcript_id "Novel_004130"; exon_number "7"; gene_type " |
| scaffold{Cufflinks}exon | 9353   | 9437   | . | . | gene_id "XLOC_295738"; transcript_id "Novel_004130"; exon_number "8"; gene_type " |
| scaffold{Cufflinks}exon | 9547   | 9734   | . | . | gene_id "XLOC_295738"; transcript_id "Novel_004130"; exon_number "9"; gene_type " |
| scaffold{Cufflinks}exon | 9040   | 9063   | . | . | gene_id "XLOC_295738"; transcript_id "Novel_004131"; exon_number "1"; gene_type " |
| scaffold{Cufflinks}exon | 9146   | 9216   | . | . | gene_id "XLOC_295738"; transcript_id "Novel_004131"; exon_number "2"; gene_type " |
| scaffold{Cufflinks}exon | 9353   | 9437   | . | . | gene_id "XLOC_295738"; transcript_id "Novel_004131"; exon_number "3"; gene_type " |
| scaffold{Cufflinks}exon | 9547   | 9611   | . | . | gene_id "XLOC_295738"; transcript_id "Novel_004131"; exon_number "4"; gene_type " |
| scaffold{Cufflinks}exon | 53683  | 54180  | . | + | gene_id "XLOC_295777"; transcript_id "Novel_004132"; exon_number "1"; gene_type " |
| scaffold{Cufflinks}exon | 55482  | 57115  | . | + | gene_id "XLOC_295777"; transcript_id "Novel_004132"; exon_number "2"; gene_type " |
| scaffold{Cufflinks}exon | 57291  | 58283  | . | + | gene_id "XLOC_295778"; transcript_id "Novel_004133"; exon_number "1"; gene_type " |
| scaffold{Cufflinks}exon | 58817  | 59805  | . | + | gene_id "XLOC_295778"; transcript_id "Novel_004133"; exon_number "2"; gene_type " |
| scaffold{Cufflinks}exon | 258703 | 259851 | . | + | gene_id "XLOC_295790"; transcript_id "Novel_004134"; exon_number "1"; gene_type " |
| scaffold{Cufflinks}exon | 345578 | 345917 | . | + | gene_id "XLOC_295794"; transcript_id "Novel_004135"; exon_number "1"; gene_type " |
| scaffold{Cufflinks}exon | 366708 | 366962 | . | + | gene_id "XLOC_295798"; transcript_id "Novel_004136"; exon_number "1"; gene_type " |
| scaffold{Cufflinks}exon | 394883 | 394975 | . | . | gene_id "XLOC_295845"; transcript_id "Novel_004137"; exon_number "1"; gene_type " |
| scaffold{Cufflinks}exon | 411518 | 412653 | . | . | gene_id "XLOC_295845"; transcript_id "Novel_004137"; exon_number "2"; gene_type " |
| scaffold{Cufflinks}exon | 109440 | 110389 | . | . | gene_id "XLOC_295851"; transcript_id "Novel_004138"; exon_number "1"; gene_type " |
| scaffold{Cufflinks}exon | 110763 | 110903 | . | . | gene_id "XLOC_295851"; transcript_id "Novel_004138"; exon_number "2"; gene_type " |
| scaffold{Cufflinks}exon | 149124 | 149397 | . | . | gene_id "XLOC_295859"; transcript_id "Novel_004139"; exon_number "1"; gene_type " |
| scaffold{Cufflinks}exon | 159972 | 160177 | . | . | gene_id "XLOC_295860"; transcript_id "Novel_004140"; exon_number "1"; gene_type " |
| scaffold{Cufflinks}exon | 160864 | 161361 | . | . | gene_id "XLOC_295860"; transcript_id "Novel_004140"; exon_number "2"; gene_type " |
| scaffold{Cufflinks}exon | 2      | 1277   | . | . | gene_id "XLOC_296256"; transcript_id "Novel_004141"; exon_number "1"; gene_type " |
| scaffold{Cufflinks}exon | 6967   | 7233   | . | . | gene_id "XLOC_296259"; transcript_id "Novel_004142"; exon_number "1"; gene_type " |
| scaffold{Cufflinks}exon | 31261  | 31405  | . | + | gene_id "XLOC_296281"; transcript_id "Novel_004143"; exon_number "1"; gene_type " |
| scaffold{Cufflinks}exon | 32586  | 32626  | . | + | gene_id "XLOC_296281"; transcript_id "Novel_004143"; exon_number "2"; gene_type " |
| scaffold{Cufflinks}exon | 32943  | 33010  | . | + | gene_id "XLOC_296281"; transcript_id "Novel_004143"; exon_number "3"; gene_type " |
| scaffold{Cufflinks}exon | 33269  | 33715  | . | + | gene_id "XLOC_296281"; transcript_id "Novel_004143"; exon_number "4"; gene_type " |



|                         |        |        |   |   |   |                                                                                   |
|-------------------------|--------|--------|---|---|---|-----------------------------------------------------------------------------------|
| scaffold\Cufflinks\exon | 207769 | 207810 | . | + | . | gene_id "XLOC_296318"; transcript_id "Novel_004150"; exon_number "7"; gene_type " |
| scaffold\Cufflinks\exon | 207896 | 208040 | . | + | . | gene_id "XLOC_296318"; transcript_id "Novel_004150"; exon_number "8"; gene_type " |
| scaffold\Cufflinks\exon | 208147 | 208553 | . | + | . | gene_id "XLOC_296318"; transcript_id "Novel_004150"; exon_number "9"; gene_type " |
| scaffold\Cufflinks\exon | 242231 | 242375 | . | + | . | gene_id "XLOC_296322"; transcript_id "Novel_004151"; exon_number "1"; gene_type " |
| scaffold\Cufflinks\exon | 242463 | 242506 | . | + | . | gene_id "XLOC_296322"; transcript_id "Novel_004151"; exon_number "2"; gene_type " |
| scaffold\Cufflinks\exon | 243336 | 243693 | . | + | . | gene_id "XLOC_296322"; transcript_id "Novel_004151"; exon_number "3"; gene_type " |
| scaffold\Cufflinks\exon | 243897 | 244214 | . | + | . | gene_id "XLOC_296322"; transcript_id "Novel_004151"; exon_number "4"; gene_type " |
| scaffold\Cufflinks\exon | 306395 | 306624 | . | + | . | gene_id "XLOC_296331"; transcript_id "Novel_004152"; exon_number "1"; gene_type " |
| scaffold\Cufflinks\exon | 306850 | 307985 | . | + | . | gene_id "XLOC_296331"; transcript_id "Novel_004152"; exon_number "2"; gene_type " |
| scaffold\Cufflinks\exon | 306395 | 306624 | . | + | . | gene_id "XLOC_296331"; transcript_id "Novel_004153"; exon_number "1"; gene_type " |
| scaffold\Cufflinks\exon | 306847 | 307985 | . | + | . | gene_id "XLOC_296331"; transcript_id "Novel_004153"; exon_number "2"; gene_type " |
| scaffold\Cufflinks\exon | 315333 | 315438 | . | + | . | gene_id "XLOC_296338"; transcript_id "Novel_004154"; exon_number "1"; gene_type " |
| scaffold\Cufflinks\exon | 315546 | 315648 | . | + | . | gene_id "XLOC_296338"; transcript_id "Novel_004154"; exon_number "2"; gene_type " |
| scaffold\Cufflinks\exon | 352938 | 353477 | . | + | . | gene_id "XLOC_296346"; transcript_id "Novel_004155"; exon_number "1"; gene_type " |
| scaffold\Cufflinks\exon | 354030 | 354198 | . | + | . | gene_id "XLOC_296346"; transcript_id "Novel_004155"; exon_number "2"; gene_type " |
| scaffold\Cufflinks\exon | 354557 | 354589 | . | + | . | gene_id "XLOC_296346"; transcript_id "Novel_004155"; exon_number "3"; gene_type " |
| scaffold\Cufflinks\exon | 354733 | 354827 | . | + | . | gene_id "XLOC_296346"; transcript_id "Novel_004155"; exon_number "4"; gene_type " |
| scaffold\Cufflinks\exon | 354948 | 355308 | . | + | . | gene_id "XLOC_296346"; transcript_id "Novel_004155"; exon_number "5"; gene_type " |
| scaffold\Cufflinks\exon | 356061 | 356699 | . | + | . | gene_id "XLOC_296346"; transcript_id "Novel_004155"; exon_number "6"; gene_type " |
| scaffold\Cufflinks\exon | 352991 | 353477 | . | + | . | gene_id "XLOC_296346"; transcript_id "Novel_004156"; exon_number "1"; gene_type " |
| scaffold\Cufflinks\exon | 354030 | 354198 | . | + | . | gene_id "XLOC_296346"; transcript_id "Novel_004156"; exon_number "2"; gene_type " |
| scaffold\Cufflinks\exon | 354733 | 354827 | . | + | . | gene_id "XLOC_296346"; transcript_id "Novel_004156"; exon_number "3"; gene_type " |
| scaffold\Cufflinks\exon | 354948 | 356787 | . | + | . | gene_id "XLOC_296346"; transcript_id "Novel_004156"; exon_number "4"; gene_type " |
| scaffold\Cufflinks\exon | 106025 | 106712 | . | - | . | gene_id "XLOC_296445"; transcript_id "Novel_004157"; exon_number "1"; gene_type " |
| scaffold\Cufflinks\exon | 107758 | 108085 | . | - | . | gene_id "XLOC_296445"; transcript_id "Novel_004157"; exon_number "2"; gene_type " |
| scaffold\Cufflinks\exon | 108358 | 108665 | . | - | . | gene_id "XLOC_296445"; transcript_id "Novel_004157"; exon_number "3"; gene_type " |
| scaffold\Cufflinks\exon | 191102 | 194269 | . | - | . | gene_id "XLOC_296456"; transcript_id "Novel_004158"; exon_number "1"; gene_type " |
| scaffold\Cufflinks\exon | 215333 | 215565 | . | - | . | gene_id "XLOC_296460"; transcript_id "Novel_004159"; exon_number "1"; gene_type " |
| scaffold\Cufflinks\exon | 215646 | 215741 | . | - | . | gene_id "XLOC_296460"; transcript_id "Novel_004159"; exon_number "2"; gene_type " |
| scaffold\Cufflinks\exon | 215874 | 215970 | . | - | . | gene_id "XLOC_296460"; transcript_id "Novel_004159"; exon_number "3"; gene_type " |
| scaffold\Cufflinks\exon | 216061 | 216166 | . | - | . | gene_id "XLOC_296460"; transcript_id "Novel_004159"; exon_number "4"; gene_type " |
| scaffold\Cufflinks\exon | 216444 | 216516 | . | - | . | gene_id "XLOC_296460"; transcript_id "Novel_004159"; exon_number "5"; gene_type " |
| scaffold\Cufflinks\exon | 216728 | 216871 | . | - | . | gene_id "XLOC_296460"; transcript_id "Novel_004159"; exon_number "6"; gene_type " |
| scaffold\Cufflinks\exon | 217032 | 217812 | . | - | . | gene_id "XLOC_296460"; transcript_id "Novel_004159"; exon_number "7"; gene_type " |
| scaffold\Cufflinks\exon | 232544 | 232797 | . | - | . | gene_id "XLOC_296466"; transcript_id "Novel_004160"; exon_number "1"; gene_type " |

|                    |      |         |         |   |   |   |         |                |               |                 |             |      |           |   |
|--------------------|------|---------|---------|---|---|---|---------|----------------|---------------|-----------------|-------------|------|-----------|---|
| scaffold6Cufflinks | exon | 233646  | 233802  | . | - | . | gene_id | "XLOC_296466"; | transcript_id | "Novel_004160"; | exon_number | "2"; | gene_type | " |
| scaffold6Cufflinks | exon | 233890  | 234025  | . | - | . | gene_id | "XLOC_296466"; | transcript_id | "Novel_004160"; | exon_number | "3"; | gene_type | " |
| scaffold6Cufflinks | exon | 234100  | 234229  | . | - | . | gene_id | "XLOC_296466"; | transcript_id | "Novel_004160"; | exon_number | "4"; | gene_type | " |
| scaffold6Cufflinks | exon | 250233  | 250659  | . | - | . | gene_id | "XLOC_296468"; | transcript_id | "Novel_004161"; | exon_number | "1"; | gene_type | " |
| scaffold6Cufflinks | exon | 250742  | 251165  | . | - | . | gene_id | "XLOC_296468"; | transcript_id | "Novel_004161"; | exon_number | "2"; | gene_type | " |
| scaffold6Cufflinks | exon | 255999  | 256542  | . | - | . | gene_id | "XLOC_296469"; | transcript_id | "Novel_004162"; | exon_number | "1"; | gene_type | " |
| scaffold6Cufflinks | exon | 256625  | 256892  | . | - | . | gene_id | "XLOC_296469"; | transcript_id | "Novel_004162"; | exon_number | "2"; | gene_type | " |
| scaffold6Cufflinks | exon | 264283  | 264597  | . | - | . | gene_id | "XLOC_296470"; | transcript_id | "Novel_004163"; | exon_number | "1"; | gene_type | " |
| scaffold6Cufflinks | exon | 265049  | 265351  | . | - | . | gene_id | "XLOC_296470"; | transcript_id | "Novel_004163"; | exon_number | "2"; | gene_type | " |
| scaffold6Cufflinks | exon | 265341  | 265674  | . | - | . | gene_id | "XLOC_296470"; | transcript_id | "Novel_004164"; | exon_number | "1"; | gene_type | " |
| scaffold6Cufflinks | exon | 265769  | 265823  | . | - | . | gene_id | "XLOC_296470"; | transcript_id | "Novel_004164"; | exon_number | "2"; | gene_type | " |
| scaffold6Cufflinks | exon | 265940  | 265996  | . | - | . | gene_id | "XLOC_296470"; | transcript_id | "Novel_004164"; | exon_number | "3"; | gene_type | " |
| scaffold6Cufflinks | exon | 266380  | 266425  | . | - | . | gene_id | "XLOC_296470"; | transcript_id | "Novel_004164"; | exon_number | "4"; | gene_type | " |
| scaffold6Cufflinks | exon | 266702  | 266784  | . | - | . | gene_id | "XLOC_296470"; | transcript_id | "Novel_004164"; | exon_number | "5"; | gene_type | " |
| scaffold6Cufflinks | exon | 267246  | 267439  | . | - | . | gene_id | "XLOC_296470"; | transcript_id | "Novel_004164"; | exon_number | "6"; | gene_type | " |
| scaffold6Cufflinks | exon | 267673  | 267757  | . | - | . | gene_id | "XLOC_296470"; | transcript_id | "Novel_004164"; | exon_number | "7"; | gene_type | " |
| scaffold6Cufflinks | exon | 268086  | 268590  | . | - | . | gene_id | "XLOC_296470"; | transcript_id | "Novel_004164"; | exon_number | "8"; | gene_type | " |
| scaffold6Cufflinks | exon | 267647  | 267757  | . | - | . | gene_id | "XLOC_296470"; | transcript_id | "Novel_004165"; | exon_number | "1"; | gene_type | " |
| scaffold6Cufflinks | exon | 268086  | 268590  | . | - | . | gene_id | "XLOC_296470"; | transcript_id | "Novel_004165"; | exon_number | "2"; | gene_type | " |
| scaffold6Cufflinks | exon | 276771  | 277480  | . | - | . | gene_id | "XLOC_296472"; | transcript_id | "Novel_004166"; | exon_number | "1"; | gene_type | " |
| scaffold6Cufflinks | exon | 335775  | 335915  | . | - | . | gene_id | "XLOC_296477"; | transcript_id | "Novel_004167"; | exon_number | "1"; | gene_type | " |
| scaffold6Cufflinks | exon | 336015  | 336080  | . | - | . | gene_id | "XLOC_296477"; | transcript_id | "Novel_004167"; | exon_number | "2"; | gene_type | " |
| scaffold6Cufflinks | exon | 336164  | 336442  | . | - | . | gene_id | "XLOC_296477"; | transcript_id | "Novel_004167"; | exon_number | "3"; | gene_type | " |
| scaffold6Cufflinks | exon | 692055  | 692856  | . | - | . | gene_id | "XLOC_296537"; | transcript_id | "Novel_004168"; | exon_number | "1"; | gene_type | " |
| scaffold6Cufflinks | exon | 693055  | 693178  | . | - | . | gene_id | "XLOC_296537"; | transcript_id | "Novel_004168"; | exon_number | "2"; | gene_type | " |
| scaffold7Cufflinks | exon | 7351    | 7650    | . | - | . | gene_id | "XLOC_296576"; | transcript_id | "Novel_004169"; | exon_number | "1"; | gene_type | " |
| scaffold7Cufflinks | exon | 5920    | 6131    | . | + | . | gene_id | "XLOC_296606"; | transcript_id | "Novel_004170"; | exon_number | "1"; | gene_type | " |
| scaffold7Cufflinks | exon | 1014    | 1299    | . | + | . | gene_id | "XLOC_296624"; | transcript_id | "Novel_004171"; | exon_number | "1"; | gene_type | " |
| scaffold7Cufflinks | exon | 220459  | 221816  | . | - | . | gene_id | "XLOC_296863"; | transcript_id | "Novel_004172"; | exon_number | "1"; | gene_type | " |
| scaffold7Cufflinks | exon | 223722  | 224085  | . | - | . | gene_id | "XLOC_296863"; | transcript_id | "Novel_004172"; | exon_number | "2"; | gene_type | " |
| scaffold7Cufflinks | exon | 1546660 | 1547362 | . | - | . | gene_id | "XLOC_297008"; | transcript_id | "Novel_004173"; | exon_number | "1"; | gene_type | " |
| scaffold7Cufflinks | exon | 1547458 | 1547510 | . | - | . | gene_id | "XLOC_297008"; | transcript_id | "Novel_004173"; | exon_number | "2"; | gene_type | " |
| scaffold7Cufflinks | exon | 1547629 | 1547724 | . | - | . | gene_id | "XLOC_297008"; | transcript_id | "Novel_004173"; | exon_number | "3"; | gene_type | " |
| scaffold7Cufflinks | exon | 1547884 | 1548101 | . | - | . | gene_id | "XLOC_297008"; | transcript_id | "Novel_004173"; | exon_number | "4"; | gene_type | " |
| scaffold7Cufflinks | exon | 1979912 | 1981156 | . | - | . | gene_id | "XLOC_297070"; | transcript_id | "Novel_004174"; | exon_number | "1"; | gene_type | " |

|                    |      |         |         |   |   |   |         |                |               |                 |             |      |           |   |
|--------------------|------|---------|---------|---|---|---|---------|----------------|---------------|-----------------|-------------|------|-----------|---|
| scaffold7Cufflinks | exon | 2013686 | 2014069 | . | - | . | gene_id | "XLOC_297074"; | transcript_id | "Novel_004175"; | exon_number | "1"; | gene_type | " |
| scaffold7Cufflinks | exon | 2014140 | 2014850 | . | - | . | gene_id | "XLOC_297074"; | transcript_id | "Novel_004175"; | exon_number | "2"; | gene_type | " |
| scaffold7Cufflinks | exon | 2015194 | 2016108 | . | - | . | gene_id | "XLOC_297074"; | transcript_id | "Novel_004175"; | exon_number | "3"; | gene_type | " |
| scaffold7Cufflinks | exon | 2013810 | 2014069 | . | - | . | gene_id | "XLOC_297074"; | transcript_id | "Novel_004176"; | exon_number | "1"; | gene_type | " |
| scaffold7Cufflinks | exon | 2014140 | 2014214 | . | - | . | gene_id | "XLOC_297074"; | transcript_id | "Novel_004176"; | exon_number | "2"; | gene_type | " |
| scaffold7Cufflinks | exon | 2014283 | 2014335 | . | - | . | gene_id | "XLOC_297074"; | transcript_id | "Novel_004176"; | exon_number | "3"; | gene_type | " |
| scaffold7Cufflinks | exon | 2014817 | 2014850 | . | - | . | gene_id | "XLOC_297074"; | transcript_id | "Novel_004176"; | exon_number | "4"; | gene_type | " |
| scaffold7Cufflinks | exon | 2015194 | 2015328 | . | - | . | gene_id | "XLOC_297074"; | transcript_id | "Novel_004176"; | exon_number | "5"; | gene_type | " |
| scaffold7Cufflinks | exon | 2016369 | 2016409 | . | - | . | gene_id | "XLOC_297074"; | transcript_id | "Novel_004176"; | exon_number | "6"; | gene_type | " |
| scaffold7Cufflinks | exon | 2016785 | 2017487 | . | - | . | gene_id | "XLOC_297074"; | transcript_id | "Novel_004176"; | exon_number | "7"; | gene_type | " |
| scaffold7Cufflinks | exon | 2013904 | 2014850 | . | - | . | gene_id | "XLOC_297074"; | transcript_id | "Novel_004177"; | exon_number | "1"; | gene_type | " |
| scaffold7Cufflinks | exon | 2015194 | 2016098 | . | - | . | gene_id | "XLOC_297074"; | transcript_id | "Novel_004177"; | exon_number | "2"; | gene_type | " |
| scaffold7Cufflinks | exon | 197000  | 197303  | . | + | . | gene_id | "XLOC_297168"; | transcript_id | "Novel_004178"; | exon_number | "1"; | gene_type | " |
| scaffold7Cufflinks | exon | 198557  | 198685  | . | + | . | gene_id | "XLOC_297168"; | transcript_id | "Novel_004178"; | exon_number | "2"; | gene_type | " |
| scaffold7Cufflinks | exon | 198769  | 198841  | . | + | . | gene_id | "XLOC_297168"; | transcript_id | "Novel_004178"; | exon_number | "3"; | gene_type | " |
| scaffold7Cufflinks | exon | 199284  | 199603  | . | + | . | gene_id | "XLOC_297168"; | transcript_id | "Novel_004178"; | exon_number | "4"; | gene_type | " |
| scaffold7Cufflinks | exon | 197035  | 197303  | . | + | . | gene_id | "XLOC_297168"; | transcript_id | "Novel_004179"; | exon_number | "1"; | gene_type | " |
| scaffold7Cufflinks | exon | 198557  | 199578  | . | + | . | gene_id | "XLOC_297168"; | transcript_id | "Novel_004179"; | exon_number | "2"; | gene_type | " |
| scaffold7Cufflinks | exon | 199734  | 200669  | . | + | . | gene_id | "XLOC_297168"; | transcript_id | "Novel_004179"; | exon_number | "3"; | gene_type | " |
| scaffold7Cufflinks | exon | 197035  | 197303  | . | + | . | gene_id | "XLOC_297168"; | transcript_id | "Novel_004180"; | exon_number | "1"; | gene_type | " |
| scaffold7Cufflinks | exon | 198557  | 198685  | . | + | . | gene_id | "XLOC_297168"; | transcript_id | "Novel_004180"; | exon_number | "2"; | gene_type | " |
| scaffold7Cufflinks | exon | 198769  | 198841  | . | + | . | gene_id | "XLOC_297168"; | transcript_id | "Novel_004180"; | exon_number | "3"; | gene_type | " |
| scaffold7Cufflinks | exon | 199284  | 199578  | . | + | . | gene_id | "XLOC_297168"; | transcript_id | "Novel_004180"; | exon_number | "4"; | gene_type | " |
| scaffold7Cufflinks | exon | 199734  | 200669  | . | + | . | gene_id | "XLOC_297168"; | transcript_id | "Novel_004180"; | exon_number | "5"; | gene_type | " |
| scaffold7Cufflinks | exon | 251028  | 251258  | . | + | . | gene_id | "XLOC_297184"; | transcript_id | "Novel_004181"; | exon_number | "1"; | gene_type | " |
| scaffold7Cufflinks | exon | 554903  | 555590  | . | + | . | gene_id | "XLOC_297227"; | transcript_id | "Novel_004182"; | exon_number | "1"; | gene_type | " |
| scaffold7Cufflinks | exon | 556406  | 556482  | . | + | . | gene_id | "XLOC_297227"; | transcript_id | "Novel_004182"; | exon_number | "2"; | gene_type | " |
| scaffold7Cufflinks | exon | 319841  | 320499  | . | - | . | gene_id | "XLOC_297310"; | transcript_id | "Novel_004183"; | exon_number | "1"; | gene_type | " |
| scaffold7Cufflinks | exon | 320587  | 320743  | . | - | . | gene_id | "XLOC_297310"; | transcript_id | "Novel_004183"; | exon_number | "2"; | gene_type | " |
| scaffold7Cufflinks | exon | 321121  | 321499  | . | - | . | gene_id | "XLOC_297310"; | transcript_id | "Novel_004183"; | exon_number | "3"; | gene_type | " |
| scaffold7Cufflinks | exon | 319848  | 320499  | . | - | . | gene_id | "XLOC_297310"; | transcript_id | "Novel_004184"; | exon_number | "1"; | gene_type | " |
| scaffold7Cufflinks | exon | 320587  | 320999  | . | - | . | gene_id | "XLOC_297310"; | transcript_id | "Novel_004184"; | exon_number | "2"; | gene_type | " |
| scaffold7Cufflinks | exon | 6031    | 6276    | . | + | . | gene_id | "XLOC_297422"; | transcript_id | "Novel_004185"; | exon_number | "1"; | gene_type | " |
| scaffold7Cufflinks | exon | 6592    | 7946    | . | + | . | gene_id | "XLOC_297422"; | transcript_id | "Novel_004185"; | exon_number | "2"; | gene_type | " |
| scaffold7Cufflinks | exon | 6031    | 6276    | . | + | . | gene_id | "XLOC_297422"; | transcript_id | "Novel_004186"; | exon_number | "1"; | gene_type | " |







|                    |      |        |        |   |   |   |         |                |               |                 |             |      |           |   |
|--------------------|------|--------|--------|---|---|---|---------|----------------|---------------|-----------------|-------------|------|-----------|---|
| scaffold7Cufflinks | exon | 743771 | 743988 | . | - | . | gene_id | "XLOC_298643"; | transcript_id | "Novel_004201"; | exon_number | "1"; | gene_type | " |
| scaffold7Cufflinks | exon | 2438   | 2764   | . | + | . | gene_id | "XLOC_298660"; | transcript_id | "Novel_004202"; | exon_number | "1"; | gene_type | " |
| scaffold7Cufflinks | exon | 534398 | 534456 | . | + | . | gene_id | "XLOC_298868"; | transcript_id | "Novel_004203"; | exon_number | "1"; | gene_type | " |
| scaffold7Cufflinks | exon | 534654 | 534781 | . | + | . | gene_id | "XLOC_298868"; | transcript_id | "Novel_004203"; | exon_number | "2"; | gene_type | " |
| scaffold7Cufflinks | exon | 536108 | 536155 | . | + | . | gene_id | "XLOC_298868"; | transcript_id | "Novel_004203"; | exon_number | "3"; | gene_type | " |
| scaffold7Cufflinks | exon | 536881 | 537505 | . | + | . | gene_id | "XLOC_298868"; | transcript_id | "Novel_004203"; | exon_number | "4"; | gene_type | " |
| scaffold7Cufflinks | exon | 534636 | 534781 | . | + | . | gene_id | "XLOC_298868"; | transcript_id | "Novel_004204"; | exon_number | "1"; | gene_type | " |
| scaffold7Cufflinks | exon | 536108 | 536155 | . | + | . | gene_id | "XLOC_298868"; | transcript_id | "Novel_004204"; | exon_number | "2"; | gene_type | " |
| scaffold7Cufflinks | exon | 536881 | 537314 | . | + | . | gene_id | "XLOC_298868"; | transcript_id | "Novel_004204"; | exon_number | "3"; | gene_type | " |
| scaffold7Cufflinks | exon | 8      | 36     | . | + | . | gene_id | "XLOC_299113"; | transcript_id | "Novel_004205"; | exon_number | "1"; | gene_type | " |
| scaffold7Cufflinks | exon | 633    | 705    | . | + | . | gene_id | "XLOC_299113"; | transcript_id | "Novel_004205"; | exon_number | "2"; | gene_type | " |
| scaffold7Cufflinks | exon | 1308   | 1441   | . | + | . | gene_id | "XLOC_299113"; | transcript_id | "Novel_004205"; | exon_number | "3"; | gene_type | " |
| scaffold7Cufflinks | exon | 1573   | 5837   | . | + | . | gene_id | "XLOC_299113"; | transcript_id | "Novel_004205"; | exon_number | "4"; | gene_type | " |
| scaffold7Cufflinks | exon | 17     | 1441   | . | + | . | gene_id | "XLOC_299113"; | transcript_id | "Novel_004206"; | exon_number | "1"; | gene_type | " |
| scaffold7Cufflinks | exon | 1573   | 3456   | . | + | . | gene_id | "XLOC_299113"; | transcript_id | "Novel_004206"; | exon_number | "2"; | gene_type | " |
| scaffold7Cufflinks | exon | 50661  | 51331  | . | + | . | gene_id | "XLOC_299153"; | transcript_id | "Novel_004207"; | exon_number | "1"; | gene_type | " |
| scaffold7Cufflinks | exon | 532895 | 533195 | . | + | . | gene_id | "XLOC_299252"; | transcript_id | "Novel_004208"; | exon_number | "1"; | gene_type | " |
| scaffold7Cufflinks | exon | 533311 | 533922 | . | + | . | gene_id | "XLOC_299252"; | transcript_id | "Novel_004208"; | exon_number | "2"; | gene_type | " |
| scaffold7Cufflinks | exon | 532897 | 533195 | . | + | . | gene_id | "XLOC_299252"; | transcript_id | "Novel_004209"; | exon_number | "1"; | gene_type | " |
| scaffold7Cufflinks | exon | 533311 | 533790 | . | + | . | gene_id | "XLOC_299252"; | transcript_id | "Novel_004209"; | exon_number | "2"; | gene_type | " |
| scaffold7Cufflinks | exon | 534229 | 534413 | . | + | . | gene_id | "XLOC_299252"; | transcript_id | "Novel_004209"; | exon_number | "3"; | gene_type | " |
| scaffold7Cufflinks | exon | 535152 | 536886 | . | + | . | gene_id | "XLOC_299252"; | transcript_id | "Novel_004209"; | exon_number | "4"; | gene_type | " |
| scaffold7Cufflinks | exon | 532966 | 533195 | . | + | . | gene_id | "XLOC_299252"; | transcript_id | "Novel_004210"; | exon_number | "1"; | gene_type | " |
| scaffold7Cufflinks | exon | 533311 | 533790 | . | + | . | gene_id | "XLOC_299252"; | transcript_id | "Novel_004210"; | exon_number | "2"; | gene_type | " |
| scaffold7Cufflinks | exon | 534229 | 535120 | . | + | . | gene_id | "XLOC_299252"; | transcript_id | "Novel_004210"; | exon_number | "3"; | gene_type | " |
| scaffold7Cufflinks | exon | 63082  | 64066  | . | + | . | gene_id | "XLOC_299451"; | transcript_id | "Novel_004211"; | exon_number | "1"; | gene_type | " |
| scaffold7Cufflinks | exon | 64581  | 65324  | . | + | . | gene_id | "XLOC_299451"; | transcript_id | "Novel_004211"; | exon_number | "2"; | gene_type | " |
| scaffold7Cufflinks | exon | 186447 | 186728 | . | + | . | gene_id | "XLOC_299468"; | transcript_id | "Novel_004212"; | exon_number | "1"; | gene_type | " |
| scaffold7Cufflinks | exon | 187251 | 187374 | . | + | . | gene_id | "XLOC_299468"; | transcript_id | "Novel_004212"; | exon_number | "2"; | gene_type | " |
| scaffold7Cufflinks | exon | 187538 | 187665 | . | + | . | gene_id | "XLOC_299468"; | transcript_id | "Novel_004212"; | exon_number | "3"; | gene_type | " |
| scaffold7Cufflinks | exon | 187758 | 187911 | . | + | . | gene_id | "XLOC_299468"; | transcript_id | "Novel_004212"; | exon_number | "4"; | gene_type | " |
| scaffold7Cufflinks | exon | 187993 | 188102 | . | + | . | gene_id | "XLOC_299468"; | transcript_id | "Novel_004212"; | exon_number | "5"; | gene_type | " |
| scaffold7Cufflinks | exon | 188306 | 188389 | . | + | . | gene_id | "XLOC_299468"; | transcript_id | "Novel_004212"; | exon_number | "6"; | gene_type | " |
| scaffold7Cufflinks | exon | 188486 | 188534 | . | + | . | gene_id | "XLOC_299468"; | transcript_id | "Novel_004212"; | exon_number | "7"; | gene_type | " |
| scaffold7Cufflinks | exon | 189333 | 189424 | . | + | . | gene_id | "XLOC_299468"; | transcript_id | "Novel_004212"; | exon_number | "8"; | gene_type | " |

|                    |      |        |        |   |   |   |         |                |               |                 |             |       |           |   |
|--------------------|------|--------|--------|---|---|---|---------|----------------|---------------|-----------------|-------------|-------|-----------|---|
| scaffold7Cufflinks | exon | 189898 | 190030 | . | + | . | gene_id | "XLOC_299468"; | transcript_id | "Novel_004212"; | exon_number | "9";  | gene_type | " |
| scaffold7Cufflinks | exon | 190252 | 190334 | . | + | . | gene_id | "XLOC_299468"; | transcript_id | "Novel_004212"; | exon_number | "10"; | gene_type | " |
| scaffold7Cufflinks | exon | 190411 | 191942 | . | + | . | gene_id | "XLOC_299468"; | transcript_id | "Novel_004212"; | exon_number | "11"; | gene_type | " |
| scaffold7Cufflinks | exon | 192330 | 192440 | . | + | . | gene_id | "XLOC_299468"; | transcript_id | "Novel_004212"; | exon_number | "12"; | gene_type | " |
| scaffold7Cufflinks | exon | 192517 | 193649 | . | + | . | gene_id | "XLOC_299468"; | transcript_id | "Novel_004212"; | exon_number | "13"; | gene_type | " |
| scaffold7Cufflinks | exon | 186537 | 186728 | . | + | . | gene_id | "XLOC_299468"; | transcript_id | "Novel_004213"; | exon_number | "1";  | gene_type | " |
| scaffold7Cufflinks | exon | 187276 | 187374 | . | + | . | gene_id | "XLOC_299468"; | transcript_id | "Novel_004213"; | exon_number | "2";  | gene_type | " |
| scaffold7Cufflinks | exon | 187538 | 188102 | . | + | . | gene_id | "XLOC_299468"; | transcript_id | "Novel_004213"; | exon_number | "3";  | gene_type | " |
| scaffold7Cufflinks | exon | 188306 | 188389 | . | + | . | gene_id | "XLOC_299468"; | transcript_id | "Novel_004213"; | exon_number | "4";  | gene_type | " |
| scaffold7Cufflinks | exon | 188486 | 188534 | . | + | . | gene_id | "XLOC_299468"; | transcript_id | "Novel_004213"; | exon_number | "5";  | gene_type | " |
| scaffold7Cufflinks | exon | 189333 | 189424 | . | + | . | gene_id | "XLOC_299468"; | transcript_id | "Novel_004213"; | exon_number | "6";  | gene_type | " |
| scaffold7Cufflinks | exon | 189898 | 190030 | . | + | . | gene_id | "XLOC_299468"; | transcript_id | "Novel_004213"; | exon_number | "7";  | gene_type | " |
| scaffold7Cufflinks | exon | 190252 | 190334 | . | + | . | gene_id | "XLOC_299468"; | transcript_id | "Novel_004213"; | exon_number | "8";  | gene_type | " |
| scaffold7Cufflinks | exon | 190411 | 191942 | . | + | . | gene_id | "XLOC_299468"; | transcript_id | "Novel_004213"; | exon_number | "9";  | gene_type | " |
| scaffold7Cufflinks | exon | 192330 | 192440 | . | + | . | gene_id | "XLOC_299468"; | transcript_id | "Novel_004213"; | exon_number | "10"; | gene_type | " |
| scaffold7Cufflinks | exon | 192517 | 193646 | . | + | . | gene_id | "XLOC_299468"; | transcript_id | "Novel_004213"; | exon_number | "11"; | gene_type | " |
| scaffold7Cufflinks | exon | 188290 | 188534 | . | + | . | gene_id | "XLOC_299468"; | transcript_id | "Novel_004214"; | exon_number | "1";  | gene_type | " |
| scaffold7Cufflinks | exon | 189333 | 189424 | . | + | . | gene_id | "XLOC_299468"; | transcript_id | "Novel_004214"; | exon_number | "2";  | gene_type | " |
| scaffold7Cufflinks | exon | 189898 | 190030 | . | + | . | gene_id | "XLOC_299468"; | transcript_id | "Novel_004214"; | exon_number | "3";  | gene_type | " |
| scaffold7Cufflinks | exon | 190252 | 190334 | . | + | . | gene_id | "XLOC_299468"; | transcript_id | "Novel_004214"; | exon_number | "4";  | gene_type | " |
| scaffold7Cufflinks | exon | 190411 | 191942 | . | + | . | gene_id | "XLOC_299468"; | transcript_id | "Novel_004214"; | exon_number | "5";  | gene_type | " |
| scaffold7Cufflinks | exon | 192330 | 192440 | . | + | . | gene_id | "XLOC_299468"; | transcript_id | "Novel_004214"; | exon_number | "6";  | gene_type | " |
| scaffold7Cufflinks | exon | 192517 | 193649 | . | + | . | gene_id | "XLOC_299468"; | transcript_id | "Novel_004214"; | exon_number | "7";  | gene_type | " |
| scaffold7Cufflinks | exon | 108068 | 108667 | . | - | . | gene_id | "XLOC_299516"; | transcript_id | "Novel_004215"; | exon_number | "1";  | gene_type | " |
| scaffold7Cufflinks | exon | 109473 | 110720 | . | - | . | gene_id | "XLOC_299516"; | transcript_id | "Novel_004215"; | exon_number | "2";  | gene_type | " |
| scaffold7Cufflinks | exon | 110867 | 111204 | . | - | . | gene_id | "XLOC_299516"; | transcript_id | "Novel_004215"; | exon_number | "3";  | gene_type | " |
| scaffold7Cufflinks | exon | 109379 | 110720 | . | - | . | gene_id | "XLOC_299516"; | transcript_id | "Novel_004216"; | exon_number | "1";  | gene_type | " |
| scaffold7Cufflinks | exon | 110867 | 111202 | . | - | . | gene_id | "XLOC_299516"; | transcript_id | "Novel_004216"; | exon_number | "2";  | gene_type | " |
| scaffold7Cufflinks | exon | 136206 | 136264 | . | - | . | gene_id | "XLOC_299524"; | transcript_id | "Novel_004217"; | exon_number | "1";  | gene_type | " |
| scaffold7Cufflinks | exon | 143526 | 143720 | . | - | . | gene_id | "XLOC_299524"; | transcript_id | "Novel_004217"; | exon_number | "2";  | gene_type | " |
| scaffold7Cufflinks | exon | 680719 | 681690 | . | - | . | gene_id | "XLOC_299566"; | transcript_id | "Novel_004218"; | exon_number | "1";  | gene_type | " |
| scaffold7Cufflinks | exon | 682201 | 683805 | . | - | . | gene_id | "XLOC_299566"; | transcript_id | "Novel_004218"; | exon_number | "2";  | gene_type | " |
| scaffold7Cufflinks | exon | 603380 | 603522 | . | + | . | gene_id | "XLOC_299790"; | transcript_id | "Novel_004219"; | exon_number | "1";  | gene_type | " |
| scaffold7Cufflinks | exon | 603613 | 603708 | . | + | . | gene_id | "XLOC_299790"; | transcript_id | "Novel_004219"; | exon_number | "2";  | gene_type | " |
| scaffold7Cufflinks | exon | 3385   | 3540   | . | + | . | gene_id | "XLOC_299958"; | transcript_id | "Novel_004220"; | exon_number | "1";  | gene_type | " |

|                    |      |        |        |   |   |   |         |                |               |                 |             |       |           |   |
|--------------------|------|--------|--------|---|---|---|---------|----------------|---------------|-----------------|-------------|-------|-----------|---|
| scaffold7Cufflinks | exon | 3651   | 3832   | . | + | . | gene_id | "XLOC_299958"; | transcript_id | "Novel_004220"; | exon_number | "2";  | gene_type | " |
| scaffold7Cufflinks | exon | 3933   | 4040   | . | + | . | gene_id | "XLOC_299958"; | transcript_id | "Novel_004220"; | exon_number | "3";  | gene_type | " |
| scaffold7Cufflinks | exon | 4676   | 4765   | . | + | . | gene_id | "XLOC_299958"; | transcript_id | "Novel_004220"; | exon_number | "4";  | gene_type | " |
| scaffold7Cufflinks | exon | 5959   | 6236   | . | + | . | gene_id | "XLOC_299958"; | transcript_id | "Novel_004220"; | exon_number | "5";  | gene_type | " |
| scaffold7Cufflinks | exon | 3385   | 3540   | . | + | . | gene_id | "XLOC_299958"; | transcript_id | "Novel_004221"; | exon_number | "1";  | gene_type | " |
| scaffold7Cufflinks | exon | 3651   | 4040   | . | + | . | gene_id | "XLOC_299958"; | transcript_id | "Novel_004221"; | exon_number | "2";  | gene_type | " |
| scaffold7Cufflinks | exon | 4676   | 4765   | . | + | . | gene_id | "XLOC_299958"; | transcript_id | "Novel_004221"; | exon_number | "3";  | gene_type | " |
| scaffold7Cufflinks | exon | 5959   | 6236   | . | + | . | gene_id | "XLOC_299958"; | transcript_id | "Novel_004221"; | exon_number | "4";  | gene_type | " |
| scaffold7Cufflinks | exon | 455    | 534    | . | + | . | gene_id | "XLOC_299971"; | transcript_id | "Novel_004222"; | exon_number | "1";  | gene_type | " |
| scaffold7Cufflinks | exon | 895    | 989    | . | + | . | gene_id | "XLOC_299971"; | transcript_id | "Novel_004222"; | exon_number | "2";  | gene_type | " |
| scaffold7Cufflinks | exon | 1155   | 1223   | . | + | . | gene_id | "XLOC_299971"; | transcript_id | "Novel_004222"; | exon_number | "3";  | gene_type | " |
| scaffold7Cufflinks | exon | 1329   | 1398   | . | + | . | gene_id | "XLOC_299971"; | transcript_id | "Novel_004222"; | exon_number | "4";  | gene_type | " |
| scaffold7Cufflinks | exon | 1848   | 2265   | . | + | . | gene_id | "XLOC_299971"; | transcript_id | "Novel_004222"; | exon_number | "5";  | gene_type | " |
| scaffold7Cufflinks | exon | 2645   | 2697   | . | + | . | gene_id | "XLOC_299971"; | transcript_id | "Novel_004222"; | exon_number | "6";  | gene_type | " |
| scaffold7Cufflinks | exon | 3081   | 3157   | . | + | . | gene_id | "XLOC_299971"; | transcript_id | "Novel_004222"; | exon_number | "7";  | gene_type | " |
| scaffold7Cufflinks | exon | 4065   | 5438   | . | + | . | gene_id | "XLOC_299971"; | transcript_id | "Novel_004222"; | exon_number | "8";  | gene_type | " |
| scaffold7Cufflinks | exon | 761    | 989    | . | + | . | gene_id | "XLOC_299971"; | transcript_id | "Novel_004223"; | exon_number | "1";  | gene_type | " |
| scaffold7Cufflinks | exon | 1155   | 1223   | . | + | . | gene_id | "XLOC_299971"; | transcript_id | "Novel_004223"; | exon_number | "2";  | gene_type | " |
| scaffold7Cufflinks | exon | 1329   | 1398   | . | + | . | gene_id | "XLOC_299971"; | transcript_id | "Novel_004223"; | exon_number | "3";  | gene_type | " |
| scaffold7Cufflinks | exon | 1848   | 1911   | . | + | . | gene_id | "XLOC_299971"; | transcript_id | "Novel_004223"; | exon_number | "4";  | gene_type | " |
| scaffold7Cufflinks | exon | 1997   | 3157   | . | + | . | gene_id | "XLOC_299971"; | transcript_id | "Novel_004223"; | exon_number | "5";  | gene_type | " |
| scaffold7Cufflinks | exon | 4065   | 5533   | . | + | . | gene_id | "XLOC_299971"; | transcript_id | "Novel_004223"; | exon_number | "6";  | gene_type | " |
| scaffold7Cufflinks | exon | 202755 | 203460 | . | + | . | gene_id | "XLOC_300316"; | transcript_id | "Novel_004224"; | exon_number | "1";  | gene_type | " |
| scaffold7Cufflinks | exon | 203622 | 203676 | . | + | . | gene_id | "XLOC_300316"; | transcript_id | "Novel_004224"; | exon_number | "2";  | gene_type | " |
| scaffold7Cufflinks | exon | 204264 | 204352 | . | + | . | gene_id | "XLOC_300316"; | transcript_id | "Novel_004224"; | exon_number | "3";  | gene_type | " |
| scaffold7Cufflinks | exon | 204633 | 204657 | . | + | . | gene_id | "XLOC_300316"; | transcript_id | "Novel_004224"; | exon_number | "4";  | gene_type | " |
| scaffold7Cufflinks | exon | 204816 | 204854 | . | + | . | gene_id | "XLOC_300316"; | transcript_id | "Novel_004224"; | exon_number | "5";  | gene_type | " |
| scaffold7Cufflinks | exon | 205820 | 205937 | . | + | . | gene_id | "XLOC_300316"; | transcript_id | "Novel_004224"; | exon_number | "6";  | gene_type | " |
| scaffold7Cufflinks | exon | 206048 | 206175 | . | + | . | gene_id | "XLOC_300316"; | transcript_id | "Novel_004224"; | exon_number | "7";  | gene_type | " |
| scaffold7Cufflinks | exon | 206324 | 206684 | . | + | . | gene_id | "XLOC_300316"; | transcript_id | "Novel_004224"; | exon_number | "8";  | gene_type | " |
| scaffold7Cufflinks | exon | 207338 | 207447 | . | + | . | gene_id | "XLOC_300316"; | transcript_id | "Novel_004224"; | exon_number | "9";  | gene_type | " |
| scaffold7Cufflinks | exon | 207826 | 208878 | . | + | . | gene_id | "XLOC_300316"; | transcript_id | "Novel_004224"; | exon_number | "10"; | gene_type | " |
| scaffold7Cufflinks | exon | 208985 | 209053 | . | + | . | gene_id | "XLOC_300316"; | transcript_id | "Novel_004224"; | exon_number | "11"; | gene_type | " |
| scaffold7Cufflinks | exon | 209170 | 209923 | . | + | . | gene_id | "XLOC_300316"; | transcript_id | "Novel_004224"; | exon_number | "12"; | gene_type | " |
| scaffold7Cufflinks | exon | 203042 | 204657 | . | + | . | gene_id | "XLOC_300316"; | transcript_id | "Novel_004225"; | exon_number | "1";  | gene_type | " |

|                    |      |        |        |   |   |   |                                                                                   |
|--------------------|------|--------|--------|---|---|---|-----------------------------------------------------------------------------------|
| scaffold7Cufflinks | exon | 204816 | 204854 | . | + | . | gene_id "XLOC_300316"; transcript_id "Novel_004225"; exon_number "2"; gene_type " |
| scaffold7Cufflinks | exon | 205820 | 205937 | . | + | . | gene_id "XLOC_300316"; transcript_id "Novel_004225"; exon_number "3"; gene_type " |
| scaffold7Cufflinks | exon | 206048 | 206175 | . | + | . | gene_id "XLOC_300316"; transcript_id "Novel_004225"; exon_number "4"; gene_type " |
| scaffold7Cufflinks | exon | 206324 | 206684 | . | + | . | gene_id "XLOC_300316"; transcript_id "Novel_004225"; exon_number "5"; gene_type " |
| scaffold7Cufflinks | exon | 207338 | 207447 | . | + | . | gene_id "XLOC_300316"; transcript_id "Novel_004225"; exon_number "6"; gene_type " |
| scaffold7Cufflinks | exon | 207826 | 208878 | . | + | . | gene_id "XLOC_300316"; transcript_id "Novel_004225"; exon_number "7"; gene_type " |
| scaffold7Cufflinks | exon | 208985 | 209053 | . | + | . | gene_id "XLOC_300316"; transcript_id "Novel_004225"; exon_number "8"; gene_type " |
| scaffold7Cufflinks | exon | 209170 | 209963 | . | + | . | gene_id "XLOC_300316"; transcript_id "Novel_004225"; exon_number "9"; gene_type " |
| scaffold7Cufflinks | exon | 205164 | 205937 | . | + | . | gene_id "XLOC_300316"; transcript_id "Novel_004226"; exon_number "1"; gene_type " |
| scaffold7Cufflinks | exon | 206048 | 206175 | . | + | . | gene_id "XLOC_300316"; transcript_id "Novel_004226"; exon_number "2"; gene_type " |
| scaffold7Cufflinks | exon | 206324 | 206684 | . | + | . | gene_id "XLOC_300316"; transcript_id "Novel_004226"; exon_number "3"; gene_type " |
| scaffold7Cufflinks | exon | 207338 | 207447 | . | + | . | gene_id "XLOC_300316"; transcript_id "Novel_004226"; exon_number "4"; gene_type " |
| scaffold7Cufflinks | exon | 207826 | 208878 | . | + | . | gene_id "XLOC_300316"; transcript_id "Novel_004226"; exon_number "5"; gene_type " |
| scaffold7Cufflinks | exon | 208985 | 209053 | . | + | . | gene_id "XLOC_300316"; transcript_id "Novel_004226"; exon_number "6"; gene_type " |
| scaffold7Cufflinks | exon | 209170 | 209923 | . | + | . | gene_id "XLOC_300316"; transcript_id "Novel_004226"; exon_number "7"; gene_type " |
| scaffold7Cufflinks | exon | 405929 | 406098 | . | + | . | gene_id "XLOC_300356"; transcript_id "Novel_004227"; exon_number "1"; gene_type " |
| scaffold7Cufflinks | exon | 406354 | 406475 | . | + | . | gene_id "XLOC_300356"; transcript_id "Novel_004227"; exon_number "2"; gene_type " |
| scaffold7Cufflinks | exon | 409602 | 410242 | . | + | . | gene_id "XLOC_300356"; transcript_id "Novel_004227"; exon_number "3"; gene_type " |
| scaffold7Cufflinks | exon | 405930 | 406098 | . | + | . | gene_id "XLOC_300356"; transcript_id "Novel_004228"; exon_number "1"; gene_type " |
| scaffold7Cufflinks | exon | 406354 | 406557 | . | + | . | gene_id "XLOC_300356"; transcript_id "Novel_004228"; exon_number "2"; gene_type " |
| scaffold7Cufflinks | exon | 447036 | 447493 | . | + | . | gene_id "XLOC_300369"; transcript_id "Novel_004229"; exon_number "1"; gene_type " |
| scaffold7Cufflinks | exon | 458579 | 458979 | . | + | . | gene_id "XLOC_300369"; transcript_id "Novel_004229"; exon_number "2"; gene_type " |
| scaffold7Cufflinks | exon | 459056 | 459861 | . | + | . | gene_id "XLOC_300369"; transcript_id "Novel_004229"; exon_number "3"; gene_type " |
| scaffold7Cufflinks | exon | 447111 | 447493 | . | + | . | gene_id "XLOC_300369"; transcript_id "Novel_004230"; exon_number "1"; gene_type " |
| scaffold7Cufflinks | exon | 447577 | 447977 | . | + | . | gene_id "XLOC_300369"; transcript_id "Novel_004230"; exon_number "2"; gene_type " |
| scaffold7Cufflinks | exon | 448054 | 448141 | . | + | . | gene_id "XLOC_300369"; transcript_id "Novel_004230"; exon_number "3"; gene_type " |
| scaffold7Cufflinks | exon | 447111 | 447493 | . | + | . | gene_id "XLOC_300369"; transcript_id "Novel_004231"; exon_number "1"; gene_type " |
| scaffold7Cufflinks | exon | 447577 | 447977 | . | + | . | gene_id "XLOC_300369"; transcript_id "Novel_004231"; exon_number "2"; gene_type " |
| scaffold7Cufflinks | exon | 459056 | 459355 | . | + | . | gene_id "XLOC_300369"; transcript_id "Novel_004231"; exon_number "3"; gene_type " |
| scaffold7Cufflinks | exon | 337160 | 339142 | . | - | . | gene_id "XLOC_300457"; transcript_id "Novel_004232"; exon_number "1"; gene_type " |
| scaffold7Cufflinks | exon | 340183 | 340266 | . | - | . | gene_id "XLOC_300457"; transcript_id "Novel_004232"; exon_number "2"; gene_type " |
| scaffold7Cufflinks | exon | 342220 | 342407 | . | - | . | gene_id "XLOC_300457"; transcript_id "Novel_004232"; exon_number "3"; gene_type " |
| scaffold7Cufflinks | exon | 740268 | 740572 | . | - | . | gene_id "XLOC_300721"; transcript_id "Novel_004233"; exon_number "1"; gene_type " |
| scaffold7Cufflinks | exon | 740943 | 741511 | . | - | . | gene_id "XLOC_300721"; transcript_id "Novel_004233"; exon_number "2"; gene_type " |
| scaffold7Cufflinks | exon | 741595 | 741732 | . | - | . | gene_id "XLOC_300721"; transcript_id "Novel_004233"; exon_number "3"; gene_type " |

|                         |        |        |   |   |   |                                                                                   |
|-------------------------|--------|--------|---|---|---|-----------------------------------------------------------------------------------|
| scaffold7Cufflinks exon | 231808 | 232446 | . | + | . | gene_id "XLOC_300782"; transcript_id "Novel_004234"; exon_number "1"; gene_type " |
| scaffold7Cufflinks exon | 232535 | 232659 | . | + | . | gene_id "XLOC_300782"; transcript_id "Novel_004234"; exon_number "2"; gene_type " |
| scaffold7Cufflinks exon | 232770 | 232891 | . | + | . | gene_id "XLOC_300782"; transcript_id "Novel_004234"; exon_number "3"; gene_type " |
| scaffold7Cufflinks exon | 233849 | 234028 | . | + | . | gene_id "XLOC_300782"; transcript_id "Novel_004234"; exon_number "4"; gene_type " |
| scaffold7Cufflinks exon | 234172 | 234264 | . | + | . | gene_id "XLOC_300782"; transcript_id "Novel_004234"; exon_number "5"; gene_type " |
| scaffold7Cufflinks exon | 234406 | 234506 | . | + | . | gene_id "XLOC_300782"; transcript_id "Novel_004234"; exon_number "6"; gene_type " |
| scaffold7Cufflinks exon | 235043 | 235095 | . | + | . | gene_id "XLOC_300782"; transcript_id "Novel_004234"; exon_number "7"; gene_type " |
| scaffold7Cufflinks exon | 235372 | 235557 | . | + | . | gene_id "XLOC_300782"; transcript_id "Novel_004234"; exon_number "8"; gene_type " |
| scaffold7Cufflinks exon | 235979 | 236273 | . | + | . | gene_id "XLOC_300782"; transcript_id "Novel_004234"; exon_number "9"; gene_type " |
| scaffold7Cufflinks exon | 233106 | 233199 | . | + | . | gene_id "XLOC_300782"; transcript_id "Novel_004235"; exon_number "1"; gene_type " |
| scaffold7Cufflinks exon | 233310 | 233431 | . | + | . | gene_id "XLOC_300782"; transcript_id "Novel_004235"; exon_number "2"; gene_type " |
| scaffold7Cufflinks exon | 233849 | 234028 | . | + | . | gene_id "XLOC_300782"; transcript_id "Novel_004235"; exon_number "3"; gene_type " |
| scaffold7Cufflinks exon | 234172 | 234264 | . | + | . | gene_id "XLOC_300782"; transcript_id "Novel_004235"; exon_number "4"; gene_type " |
| scaffold7Cufflinks exon | 234406 | 234506 | . | + | . | gene_id "XLOC_300782"; transcript_id "Novel_004235"; exon_number "5"; gene_type " |
| scaffold7Cufflinks exon | 235043 | 235095 | . | + | . | gene_id "XLOC_300782"; transcript_id "Novel_004235"; exon_number "6"; gene_type " |
| scaffold7Cufflinks exon | 235372 | 235557 | . | + | . | gene_id "XLOC_300782"; transcript_id "Novel_004235"; exon_number "7"; gene_type " |
| scaffold7Cufflinks exon | 235979 | 236276 | . | + | . | gene_id "XLOC_300782"; transcript_id "Novel_004235"; exon_number "8"; gene_type " |
| scaffold7Cufflinks exon | 600843 | 600986 | . | + | . | gene_id "XLOC_300838"; transcript_id "Novel_004236"; exon_number "1"; gene_type " |
| scaffold7Cufflinks exon | 601253 | 601328 | . | + | . | gene_id "XLOC_300838"; transcript_id "Novel_004236"; exon_number "2"; gene_type " |
| scaffold7Cufflinks exon | 602258 | 602367 | . | + | . | gene_id "XLOC_300838"; transcript_id "Novel_004236"; exon_number "3"; gene_type " |
| scaffold7Cufflinks exon | 601958 | 602146 | . | + | . | gene_id "XLOC_300838"; transcript_id "Novel_004237"; exon_number "1"; gene_type " |
| scaffold7Cufflinks exon | 602258 | 602367 | . | + | . | gene_id "XLOC_300838"; transcript_id "Novel_004237"; exon_number "2"; gene_type " |
| scaffold8Cufflinks exon | 20263  | 20325  | . | + | . | gene_id "XLOC_300946"; transcript_id "Novel_004238"; exon_number "1"; gene_type " |
| scaffold8Cufflinks exon | 20704  | 20847  | . | + | . | gene_id "XLOC_300946"; transcript_id "Novel_004238"; exon_number "2"; gene_type " |
| scaffold8Cufflinks exon | 20942  | 21347  | . | + | . | gene_id "XLOC_300946"; transcript_id "Novel_004238"; exon_number "3"; gene_type " |
| scaffold8Cufflinks exon | 20591  | 20847  | . | + | . | gene_id "XLOC_300946"; transcript_id "Novel_004239"; exon_number "1"; gene_type " |
| scaffold8Cufflinks exon | 20942  | 21335  | . | + | . | gene_id "XLOC_300946"; transcript_id "Novel_004239"; exon_number "2"; gene_type " |
| scaffold8Cufflinks exon | 47113  | 47279  | . | + | . | gene_id "XLOC_300950"; transcript_id "Novel_004240"; exon_number "1"; gene_type " |
| scaffold8Cufflinks exon | 47886  | 48499  | . | + | . | gene_id "XLOC_300950"; transcript_id "Novel_004240"; exon_number "2"; gene_type " |
| scaffold8Cufflinks exon | 47117  | 47279  | . | + | . | gene_id "XLOC_300950"; transcript_id "Novel_004241"; exon_number "1"; gene_type " |
| scaffold8Cufflinks exon | 47886  | 48019  | . | + | . | gene_id "XLOC_300950"; transcript_id "Novel_004241"; exon_number "2"; gene_type " |
| scaffold8Cufflinks exon | 48817  | 49662  | . | + | . | gene_id "XLOC_300950"; transcript_id "Novel_004241"; exon_number "3"; gene_type " |
| scaffold8Cufflinks exon | 75717  | 76122  | . | + | . | gene_id "XLOC_300957"; transcript_id "Novel_004242"; exon_number "1"; gene_type " |
| scaffold8Cufflinks exon | 76216  | 76351  | . | + | . | gene_id "XLOC_300957"; transcript_id "Novel_004242"; exon_number "2"; gene_type " |
| scaffold8Cufflinks exon | 77525  | 77618  | . | + | . | gene_id "XLOC_300957"; transcript_id "Novel_004242"; exon_number "3"; gene_type " |

|                         |        |        |   |   |   |                                                                                   |
|-------------------------|--------|--------|---|---|---|-----------------------------------------------------------------------------------|
| scaffold\Cufflinks\exon | 78378  | 78481  | . | + | . | gene_id "XLOC_300957"; transcript_id "Novel_004242"; exon_number "4"; gene_type " |
| scaffold\Cufflinks\exon | 78553  | 78685  | . | + | . | gene_id "XLOC_300957"; transcript_id "Novel_004242"; exon_number "5"; gene_type " |
| scaffold\Cufflinks\exon | 78781  | 78851  | . | + | . | gene_id "XLOC_300957"; transcript_id "Novel_004242"; exon_number "6"; gene_type " |
| scaffold\Cufflinks\exon | 78933  | 79405  | . | + | . | gene_id "XLOC_300957"; transcript_id "Novel_004242"; exon_number "7"; gene_type " |
| scaffold\Cufflinks\exon | 76870  | 77618  | . | + | . | gene_id "XLOC_300957"; transcript_id "Novel_004243"; exon_number "1"; gene_type " |
| scaffold\Cufflinks\exon | 78378  | 78481  | . | + | . | gene_id "XLOC_300957"; transcript_id "Novel_004243"; exon_number "2"; gene_type " |
| scaffold\Cufflinks\exon | 78553  | 78685  | . | + | . | gene_id "XLOC_300957"; transcript_id "Novel_004243"; exon_number "3"; gene_type " |
| scaffold\Cufflinks\exon | 78781  | 78851  | . | + | . | gene_id "XLOC_300957"; transcript_id "Novel_004243"; exon_number "4"; gene_type " |
| scaffold\Cufflinks\exon | 78933  | 79303  | . | + | . | gene_id "XLOC_300957"; transcript_id "Novel_004243"; exon_number "5"; gene_type " |
| scaffold\Cufflinks\exon | 231290 | 231661 | . | + | . | gene_id "XLOC_300996"; transcript_id "Novel_004244"; exon_number "1"; gene_type " |
| scaffold\Cufflinks\exon | 231771 | 231876 | . | + | . | gene_id "XLOC_300996"; transcript_id "Novel_004244"; exon_number "2"; gene_type " |
| scaffold\Cufflinks\exon | 231996 | 232192 | . | + | . | gene_id "XLOC_300996"; transcript_id "Novel_004244"; exon_number "3"; gene_type " |
| scaffold\Cufflinks\exon | 231290 | 231661 | . | + | . | gene_id "XLOC_300996"; transcript_id "Novel_004245"; exon_number "1"; gene_type " |
| scaffold\Cufflinks\exon | 231771 | 231876 | . | + | . | gene_id "XLOC_300996"; transcript_id "Novel_004245"; exon_number "2"; gene_type " |
| scaffold\Cufflinks\exon | 231996 | 232076 | . | + | . | gene_id "XLOC_300996"; transcript_id "Novel_004245"; exon_number "3"; gene_type " |
| scaffold\Cufflinks\exon | 233303 | 235206 | . | + | . | gene_id "XLOC_300996"; transcript_id "Novel_004245"; exon_number "4"; gene_type " |
| scaffold\Cufflinks\exon | 231525 | 231876 | . | + | . | gene_id "XLOC_300996"; transcript_id "Novel_004246"; exon_number "1"; gene_type " |
| scaffold\Cufflinks\exon | 231996 | 232076 | . | + | . | gene_id "XLOC_300996"; transcript_id "Novel_004246"; exon_number "2"; gene_type " |
| scaffold\Cufflinks\exon | 233303 | 233503 | . | + | . | gene_id "XLOC_300996"; transcript_id "Novel_004246"; exon_number "3"; gene_type " |
| scaffold\Cufflinks\exon | 302917 | 303303 | . | + | . | gene_id "XLOC_301014"; transcript_id "Novel_004247"; exon_number "1"; gene_type " |
| scaffold\Cufflinks\exon | 304814 | 305217 | . | + | . | gene_id "XLOC_301014"; transcript_id "Novel_004247"; exon_number "2"; gene_type " |
| scaffold\Cufflinks\exon | 302934 | 303303 | . | + | . | gene_id "XLOC_301014"; transcript_id "Novel_004248"; exon_number "1"; gene_type " |
| scaffold\Cufflinks\exon | 304814 | 305057 | . | + | . | gene_id "XLOC_301014"; transcript_id "Novel_004248"; exon_number "2"; gene_type " |
| scaffold\Cufflinks\exon | 306266 | 306747 | . | + | . | gene_id "XLOC_301014"; transcript_id "Novel_004248"; exon_number "3"; gene_type " |
| scaffold\Cufflinks\exon | 302934 | 303303 | . | + | . | gene_id "XLOC_301014"; transcript_id "Novel_004249"; exon_number "1"; gene_type " |
| scaffold\Cufflinks\exon | 304814 | 305057 | . | + | . | gene_id "XLOC_301014"; transcript_id "Novel_004249"; exon_number "2"; gene_type " |
| scaffold\Cufflinks\exon | 306266 | 306445 | . | + | . | gene_id "XLOC_301014"; transcript_id "Novel_004249"; exon_number "3"; gene_type " |
| scaffold\Cufflinks\exon | 307232 | 307686 | . | + | . | gene_id "XLOC_301014"; transcript_id "Novel_004249"; exon_number "4"; gene_type " |
| scaffold\Cufflinks\exon | 318980 | 319895 | . | + | . | gene_id "XLOC_301020"; transcript_id "Novel_004250"; exon_number "1"; gene_type " |
| scaffold\Cufflinks\exon | 320476 | 320571 | . | + | . | gene_id "XLOC_301020"; transcript_id "Novel_004250"; exon_number "2"; gene_type " |
| scaffold\Cufflinks\exon | 332698 | 333123 | . | + | . | gene_id "XLOC_301022"; transcript_id "Novel_004251"; exon_number "1"; gene_type " |
| scaffold\Cufflinks\exon | 335347 | 335594 | . | + | . | gene_id "XLOC_301022"; transcript_id "Novel_004251"; exon_number "2"; gene_type " |
| scaffold\Cufflinks\exon | 336777 | 336836 | . | + | . | gene_id "XLOC_301022"; transcript_id "Novel_004251"; exon_number "3"; gene_type " |
| scaffold\Cufflinks\exon | 382499 | 382629 | . | + | . | gene_id "XLOC_301030"; transcript_id "Novel_004252"; exon_number "1"; gene_type " |
| scaffold\Cufflinks\exon | 383924 | 384931 | . | + | . | gene_id "XLOC_301030"; transcript_id "Novel_004252"; exon_number "2"; gene_type " |

|                         |        |        |   |   |   |                                                                                   |
|-------------------------|--------|--------|---|---|---|-----------------------------------------------------------------------------------|
| scaffold\Cufflinks\exon | 445047 | 446154 | . | + | . | gene_id "XLOC_301043"; transcript_id "Novel_004253"; exon_number "1"; gene_type " |
| scaffold\Cufflinks\exon | 446237 | 446384 | . | + | . | gene_id "XLOC_301043"; transcript_id "Novel_004253"; exon_number "2"; gene_type " |
| scaffold\Cufflinks\exon | 506487 | 506561 | . | + | . | gene_id "XLOC_301055"; transcript_id "Novel_004254"; exon_number "1"; gene_type " |
| scaffold\Cufflinks\exon | 508001 | 508222 | . | + | . | gene_id "XLOC_301055"; transcript_id "Novel_004254"; exon_number "2"; gene_type " |
| scaffold\Cufflinks\exon | 508798 | 508992 | . | + | . | gene_id "XLOC_301055"; transcript_id "Novel_004254"; exon_number "3"; gene_type " |
| scaffold\Cufflinks\exon | 509102 | 509312 | . | + | . | gene_id "XLOC_301055"; transcript_id "Novel_004254"; exon_number "4"; gene_type " |
| scaffold\Cufflinks\exon | 79907  | 80032  | . | - | . | gene_id "XLOC_301117"; transcript_id "Novel_004255"; exon_number "1"; gene_type " |
| scaffold\Cufflinks\exon | 80116  | 80354  | . | - | . | gene_id "XLOC_301117"; transcript_id "Novel_004255"; exon_number "2"; gene_type " |
| scaffold\Cufflinks\exon | 80433  | 80735  | . | - | . | gene_id "XLOC_301117"; transcript_id "Novel_004255"; exon_number "3"; gene_type " |
| scaffold\Cufflinks\exon | 82295  | 82506  | . | - | . | gene_id "XLOC_301117"; transcript_id "Novel_004256"; exon_number "1"; gene_type " |
| scaffold\Cufflinks\exon | 83203  | 83414  | . | - | . | gene_id "XLOC_301117"; transcript_id "Novel_004256"; exon_number "2"; gene_type " |
| scaffold\Cufflinks\exon | 91497  | 91994  | . | - | . | gene_id "XLOC_301121"; transcript_id "Novel_004257"; exon_number "1"; gene_type " |
| scaffold\Cufflinks\exon | 92436  | 92486  | . | - | . | gene_id "XLOC_301121"; transcript_id "Novel_004257"; exon_number "2"; gene_type " |
| scaffold\Cufflinks\exon | 100475 | 101293 | . | - | . | gene_id "XLOC_301128"; transcript_id "Novel_004258"; exon_number "1"; gene_type " |
| scaffold\Cufflinks\exon | 101418 | 101506 | . | - | . | gene_id "XLOC_301128"; transcript_id "Novel_004258"; exon_number "2"; gene_type " |
| scaffold\Cufflinks\exon | 101584 | 101796 | . | - | . | gene_id "XLOC_301128"; transcript_id "Novel_004258"; exon_number "3"; gene_type " |
| scaffold\Cufflinks\exon | 102331 | 102501 | . | - | . | gene_id "XLOC_301128"; transcript_id "Novel_004258"; exon_number "4"; gene_type " |
| scaffold\Cufflinks\exon | 103815 | 103991 | . | - | . | gene_id "XLOC_301128"; transcript_id "Novel_004258"; exon_number "5"; gene_type " |
| scaffold\Cufflinks\exon | 104455 | 104535 | . | - | . | gene_id "XLOC_301128"; transcript_id "Novel_004258"; exon_number "6"; gene_type " |
| scaffold\Cufflinks\exon | 104612 | 104857 | . | - | . | gene_id "XLOC_301128"; transcript_id "Novel_004258"; exon_number "7"; gene_type " |
| scaffold\Cufflinks\exon | 100510 | 101293 | . | - | . | gene_id "XLOC_301128"; transcript_id "Novel_004259"; exon_number "1"; gene_type " |
| scaffold\Cufflinks\exon | 101418 | 101506 | . | - | . | gene_id "XLOC_301128"; transcript_id "Novel_004259"; exon_number "2"; gene_type " |
| scaffold\Cufflinks\exon | 101584 | 101796 | . | - | . | gene_id "XLOC_301128"; transcript_id "Novel_004259"; exon_number "3"; gene_type " |
| scaffold\Cufflinks\exon | 102331 | 102501 | . | - | . | gene_id "XLOC_301128"; transcript_id "Novel_004259"; exon_number "4"; gene_type " |
| scaffold\Cufflinks\exon | 103815 | 104535 | . | - | . | gene_id "XLOC_301128"; transcript_id "Novel_004259"; exon_number "5"; gene_type " |
| scaffold\Cufflinks\exon | 104612 | 104849 | . | - | . | gene_id "XLOC_301128"; transcript_id "Novel_004259"; exon_number "6"; gene_type " |
| scaffold\Cufflinks\exon | 107065 | 108425 | . | - | . | gene_id "XLOC_301131"; transcript_id "Novel_004260"; exon_number "1"; gene_type " |
| scaffold\Cufflinks\exon | 108531 | 108785 | . | - | . | gene_id "XLOC_301131"; transcript_id "Novel_004260"; exon_number "2"; gene_type " |
| scaffold\Cufflinks\exon | 108889 | 109012 | . | - | . | gene_id "XLOC_301131"; transcript_id "Novel_004260"; exon_number "3"; gene_type " |
| scaffold\Cufflinks\exon | 109091 | 109143 | . | - | . | gene_id "XLOC_301131"; transcript_id "Novel_004260"; exon_number "4"; gene_type " |
| scaffold\Cufflinks\exon | 109227 | 109487 | . | - | . | gene_id "XLOC_301131"; transcript_id "Novel_004260"; exon_number "5"; gene_type " |
| scaffold\Cufflinks\exon | 110485 | 110538 | . | - | . | gene_id "XLOC_301131"; transcript_id "Novel_004260"; exon_number "6"; gene_type " |
| scaffold\Cufflinks\exon | 110625 | 111120 | . | - | . | gene_id "XLOC_301131"; transcript_id "Novel_004260"; exon_number "7"; gene_type " |
| scaffold\Cufflinks\exon | 111222 | 111570 | . | - | . | gene_id "XLOC_301131"; transcript_id "Novel_004260"; exon_number "8"; gene_type " |
| scaffold\Cufflinks\exon | 107182 | 108425 | . | - | . | gene_id "XLOC_301131"; transcript_id "Novel_004261"; exon_number "1"; gene_type " |





|                         |        |        |   |   |   |                                                                                    |
|-------------------------|--------|--------|---|---|---|------------------------------------------------------------------------------------|
| scaffold\Cufflinks\exon | 312828 | 312918 | . | - | . | gene_id "XLOC_301167"; transcript_id "Novel_004266"; exon_number "9"; gene_type "  |
| scaffold\Cufflinks\exon | 313011 | 313061 | . | - | . | gene_id "XLOC_301167"; transcript_id "Novel_004266"; exon_number "10"; gene_type " |
| scaffold\Cufflinks\exon | 313540 | 313947 | . | - | . | gene_id "XLOC_301167"; transcript_id "Novel_004266"; exon_number "11"; gene_type " |
| scaffold\Cufflinks\exon | 386911 | 387420 | . | - | . | gene_id "XLOC_301180"; transcript_id "Novel_004267"; exon_number "1"; gene_type "  |
| scaffold\Cufflinks\exon | 387824 | 388368 | . | - | . | gene_id "XLOC_301180"; transcript_id "Novel_004267"; exon_number "2"; gene_type "  |
| scaffold\Cufflinks\exon | 386920 | 387420 | . | - | . | gene_id "XLOC_301180"; transcript_id "Novel_004268"; exon_number "1"; gene_type "  |
| scaffold\Cufflinks\exon | 387820 | 388393 | . | - | . | gene_id "XLOC_301180"; transcript_id "Novel_004268"; exon_number "2"; gene_type "  |
| scaffold\Cufflinks\exon | 389144 | 389452 | . | - | . | gene_id "XLOC_301182"; transcript_id "Novel_004269"; exon_number "1"; gene_type "  |
| scaffold\Cufflinks\exon | 390385 | 390524 | . | - | . | gene_id "XLOC_301182"; transcript_id "Novel_004269"; exon_number "2"; gene_type "  |
| scaffold\Cufflinks\exon | 391112 | 391159 | . | - | . | gene_id "XLOC_301182"; transcript_id "Novel_004269"; exon_number "3"; gene_type "  |
| scaffold\Cufflinks\exon | 391987 | 392073 | . | - | . | gene_id "XLOC_301182"; transcript_id "Novel_004269"; exon_number "4"; gene_type "  |
| scaffold\Cufflinks\exon | 393246 | 395095 | . | - | . | gene_id "XLOC_301182"; transcript_id "Novel_004269"; exon_number "5"; gene_type "  |
| scaffold\Cufflinks\exon | 403291 | 403786 | . | - | . | gene_id "XLOC_301186"; transcript_id "Novel_004270"; exon_number "1"; gene_type "  |
| scaffold\Cufflinks\exon | 406201 | 407459 | . | - | . | gene_id "XLOC_301186"; transcript_id "Novel_004270"; exon_number "2"; gene_type "  |
| scaffold\Cufflinks\exon | 407969 | 408200 | . | - | . | gene_id "XLOC_301186"; transcript_id "Novel_004270"; exon_number "3"; gene_type "  |
| scaffold\Cufflinks\exon | 603398 | 603967 | . | - | . | gene_id "XLOC_301217"; transcript_id "Novel_004271"; exon_number "1"; gene_type "  |
| scaffold\Cufflinks\exon | 605635 | 606011 | . | - | . | gene_id "XLOC_301217"; transcript_id "Novel_004271"; exon_number "2"; gene_type "  |
| scaffold\Cufflinks\exon | 411827 | 412160 | . | + | . | gene_id "XLOC_301294"; transcript_id "Novel_004272"; exon_number "1"; gene_type "  |
| scaffold\Cufflinks\exon | 413971 | 414386 | . | + | . | gene_id "XLOC_301294"; transcript_id "Novel_004272"; exon_number "2"; gene_type "  |
| scaffold\Cufflinks\exon | 438445 | 443065 | . | + | . | gene_id "XLOC_301297"; transcript_id "Novel_004273"; exon_number "1"; gene_type "  |
| scaffold\Cufflinks\exon | 443156 | 443229 | . | + | . | gene_id "XLOC_301297"; transcript_id "Novel_004273"; exon_number "2"; gene_type "  |
| scaffold\Cufflinks\exon | 443343 | 443392 | . | + | . | gene_id "XLOC_301297"; transcript_id "Novel_004273"; exon_number "3"; gene_type "  |
| scaffold\Cufflinks\exon | 443809 | 444202 | . | + | . | gene_id "XLOC_301297"; transcript_id "Novel_004273"; exon_number "4"; gene_type "  |
| scaffold\Cufflinks\exon | 439395 | 439508 | . | + | . | gene_id "XLOC_301297"; transcript_id "Novel_004274"; exon_number "1"; gene_type "  |
| scaffold\Cufflinks\exon | 439746 | 439825 | . | + | . | gene_id "XLOC_301297"; transcript_id "Novel_004274"; exon_number "2"; gene_type "  |
| scaffold\Cufflinks\exon | 440160 | 444242 | . | + | . | gene_id "XLOC_301297"; transcript_id "Novel_004274"; exon_number "3"; gene_type "  |
| scaffold\Cufflinks\exon | 514589 | 515482 | . | - | . | gene_id "XLOC_301342"; transcript_id "Novel_004275"; exon_number "1"; gene_type "  |
| scaffold\Cufflinks\exon | 515619 | 515780 | . | - | . | gene_id "XLOC_301342"; transcript_id "Novel_004275"; exon_number "2"; gene_type "  |
| scaffold\Cufflinks\exon | 515867 | 515963 | . | - | . | gene_id "XLOC_301342"; transcript_id "Novel_004275"; exon_number "3"; gene_type "  |
| scaffold\Cufflinks\exon | 516046 | 516176 | . | - | . | gene_id "XLOC_301342"; transcript_id "Novel_004275"; exon_number "4"; gene_type "  |
| scaffold\Cufflinks\exon | 516254 | 516309 | . | - | . | gene_id "XLOC_301342"; transcript_id "Novel_004275"; exon_number "5"; gene_type "  |
| scaffold\Cufflinks\exon | 517424 | 517506 | . | - | . | gene_id "XLOC_301342"; transcript_id "Novel_004275"; exon_number "6"; gene_type "  |
| scaffold\Cufflinks\exon | 517856 | 518700 | . | - | . | gene_id "XLOC_301342"; transcript_id "Novel_004275"; exon_number "7"; gene_type "  |
| scaffold\Cufflinks\exon | 515247 | 515482 | . | - | . | gene_id "XLOC_301342"; transcript_id "Novel_004276"; exon_number "1"; gene_type "  |
| scaffold\Cufflinks\exon | 515619 | 515780 | . | - | . | gene_id "XLOC_301342"; transcript_id "Novel_004276"; exon_number "2"; gene_type "  |

|                         |        |        |   |   |   |                                                                                   |
|-------------------------|--------|--------|---|---|---|-----------------------------------------------------------------------------------|
| scaffold\Cufflinks\exon | 515867 | 515963 | . | - | . | gene_id "XLOC_301342"; transcript_id "Novel_004276"; exon_number "3"; gene_type " |
| scaffold\Cufflinks\exon | 516046 | 516176 | . | - | . | gene_id "XLOC_301342"; transcript_id "Novel_004276"; exon_number "4"; gene_type " |
| scaffold\Cufflinks\exon | 516254 | 516434 | . | - | . | gene_id "XLOC_301342"; transcript_id "Novel_004276"; exon_number "5"; gene_type " |
| scaffold\Cufflinks\exon | 526911 | 526925 | . | - | . | gene_id "XLOC_301342"; transcript_id "Novel_004277"; exon_number "1"; gene_type " |
| scaffold\Cufflinks\exon | 527076 | 527168 | . | - | . | gene_id "XLOC_301342"; transcript_id "Novel_004277"; exon_number "2"; gene_type " |
| scaffold\Cufflinks\exon | 527302 | 527328 | . | - | . | gene_id "XLOC_301342"; transcript_id "Novel_004277"; exon_number "3"; gene_type " |
| scaffold\Cufflinks\exon | 528865 | 530851 | . | - | . | gene_id "XLOC_301342"; transcript_id "Novel_004277"; exon_number "4"; gene_type " |
| scaffold\Cufflinks\exon | 527092 | 527168 | . | - | . | gene_id "XLOC_301342"; transcript_id "Novel_004278"; exon_number "1"; gene_type " |
| scaffold\Cufflinks\exon | 527302 | 530806 | . | - | . | gene_id "XLOC_301342"; transcript_id "Novel_004278"; exon_number "2"; gene_type " |
| scaffold\Cufflinks\exon | 527337 | 529724 | . | - | . | gene_id "XLOC_301342"; transcript_id "Novel_004279"; exon_number "1"; gene_type " |
| scaffold\Cufflinks\exon | 530646 | 530851 | . | - | . | gene_id "XLOC_301342"; transcript_id "Novel_004279"; exon_number "2"; gene_type " |
| scaffold\Cufflinks\exon | 274259 | 274882 | . | + | . | gene_id "XLOC_301470"; transcript_id "Novel_004280"; exon_number "1"; gene_type " |
| scaffold\Cufflinks\exon | 275672 | 277320 | . | + | . | gene_id "XLOC_301470"; transcript_id "Novel_004280"; exon_number "2"; gene_type " |
| scaffold\Cufflinks\exon | 221223 | 222434 | . | - | . | gene_id "XLOC_301950"; transcript_id "Novel_004281"; exon_number "1"; gene_type " |
| scaffold\Cufflinks\exon | 223288 | 223367 | . | - | . | gene_id "XLOC_301950"; transcript_id "Novel_004281"; exon_number "2"; gene_type " |
| scaffold\Cufflinks\exon | 223670 | 224442 | . | - | . | gene_id "XLOC_301950"; transcript_id "Novel_004281"; exon_number "3"; gene_type " |
| scaffold\Cufflinks\exon | 214510 | 214820 | . | + | . | gene_id "XLOC_302042"; transcript_id "Novel_004282"; exon_number "1"; gene_type " |
| scaffold\Cufflinks\exon | 215384 | 215505 | . | + | . | gene_id "XLOC_302042"; transcript_id "Novel_004282"; exon_number "2"; gene_type " |
| scaffold\Cufflinks\exon | 302627 | 303001 | . | + | . | gene_id "XLOC_302059"; transcript_id "Novel_004283"; exon_number "1"; gene_type " |
| scaffold\Cufflinks\exon | 303181 | 303297 | . | + | . | gene_id "XLOC_302059"; transcript_id "Novel_004283"; exon_number "2"; gene_type " |
| scaffold\Cufflinks\exon | 303398 | 303710 | . | + | . | gene_id "XLOC_302059"; transcript_id "Novel_004283"; exon_number "3"; gene_type " |
| scaffold\Cufflinks\exon | 303933 | 305351 | . | + | . | gene_id "XLOC_302060"; transcript_id "Novel_004284"; exon_number "1"; gene_type " |
| scaffold\Cufflinks\exon | 305944 | 306412 | . | + | . | gene_id "XLOC_302060"; transcript_id "Novel_004284"; exon_number "2"; gene_type " |
| scaffold\Cufflinks\exon | 345058 | 345129 | . | + | . | gene_id "XLOC_302068"; transcript_id "Novel_004285"; exon_number "1"; gene_type " |
| scaffold\Cufflinks\exon | 345209 | 345256 | . | + | . | gene_id "XLOC_302068"; transcript_id "Novel_004285"; exon_number "2"; gene_type " |
| scaffold\Cufflinks\exon | 345323 | 345374 | . | + | . | gene_id "XLOC_302068"; transcript_id "Novel_004285"; exon_number "3"; gene_type " |
| scaffold\Cufflinks\exon | 345450 | 345879 | . | + | . | gene_id "XLOC_302068"; transcript_id "Novel_004285"; exon_number "4"; gene_type " |
| scaffold\Cufflinks\exon | 345077 | 345129 | . | + | . | gene_id "XLOC_302068"; transcript_id "Novel_004286"; exon_number "1"; gene_type " |
| scaffold\Cufflinks\exon | 345209 | 345247 | . | + | . | gene_id "XLOC_302068"; transcript_id "Novel_004286"; exon_number "2"; gene_type " |
| scaffold\Cufflinks\exon | 345323 | 345374 | . | + | . | gene_id "XLOC_302068"; transcript_id "Novel_004286"; exon_number "3"; gene_type " |
| scaffold\Cufflinks\exon | 345450 | 345814 | . | + | . | gene_id "XLOC_302068"; transcript_id "Novel_004286"; exon_number "4"; gene_type " |
| scaffold\Cufflinks\exon | 376058 | 376571 | . | + | . | gene_id "XLOC_302071"; transcript_id "Novel_004287"; exon_number "1"; gene_type " |
| scaffold\Cufflinks\exon | 378384 | 378736 | . | + | . | gene_id "XLOC_302071"; transcript_id "Novel_004287"; exon_number "2"; gene_type " |
| scaffold\Cufflinks\exon | 378816 | 381438 | . | + | . | gene_id "XLOC_302071"; transcript_id "Novel_004287"; exon_number "3"; gene_type " |
| scaffold\Cufflinks\exon | 381573 | 382040 | . | + | . | gene_id "XLOC_302071"; transcript_id "Novel_004287"; exon_number "4"; gene_type " |

|                         |        |        |   |   |   |                                                                                    |
|-------------------------|--------|--------|---|---|---|------------------------------------------------------------------------------------|
| scaffold\Cufflinks\exon | 379250 | 381450 | . | + | . | gene_id "XLOC_302071"; transcript_id "Novel_004288"; exon_number "1"; gene_type "  |
| scaffold\Cufflinks\exon | 381573 | 382062 | . | + | . | gene_id "XLOC_302071"; transcript_id "Novel_004288"; exon_number "2"; gene_type "  |
| scaffold\Cufflinks\exon | 387639 | 387874 | . | + | . | gene_id "XLOC_302074"; transcript_id "Novel_004289"; exon_number "1"; gene_type "  |
| scaffold\Cufflinks\exon | 387978 | 388054 | . | + | . | gene_id "XLOC_302074"; transcript_id "Novel_004289"; exon_number "2"; gene_type "  |
| scaffold\Cufflinks\exon | 388192 | 388269 | . | + | . | gene_id "XLOC_302074"; transcript_id "Novel_004289"; exon_number "3"; gene_type "  |
| scaffold\Cufflinks\exon | 388382 | 388452 | . | + | . | gene_id "XLOC_302074"; transcript_id "Novel_004289"; exon_number "4"; gene_type "  |
| scaffold\Cufflinks\exon | 389143 | 389692 | . | + | . | gene_id "XLOC_302074"; transcript_id "Novel_004289"; exon_number "5"; gene_type "  |
| scaffold\Cufflinks\exon | 499355 | 499403 | . | + | . | gene_id "XLOC_302097"; transcript_id "Novel_004290"; exon_number "1"; gene_type "  |
| scaffold\Cufflinks\exon | 499519 | 499580 | . | + | . | gene_id "XLOC_302097"; transcript_id "Novel_004290"; exon_number "2"; gene_type "  |
| scaffold\Cufflinks\exon | 499667 | 499772 | . | + | . | gene_id "XLOC_302097"; transcript_id "Novel_004290"; exon_number "3"; gene_type "  |
| scaffold\Cufflinks\exon | 667796 | 667892 | . | + | . | gene_id "XLOC_302127"; transcript_id "Novel_004291"; exon_number "1"; gene_type "  |
| scaffold\Cufflinks\exon | 667979 | 668108 | . | + | . | gene_id "XLOC_302127"; transcript_id "Novel_004291"; exon_number "2"; gene_type "  |
| scaffold\Cufflinks\exon | 40797  | 40901  | . | - | . | gene_id "XLOC_302149"; transcript_id "Novel_004292"; exon_number "1"; gene_type "  |
| scaffold\Cufflinks\exon | 41008  | 41226  | . | - | . | gene_id "XLOC_302149"; transcript_id "Novel_004292"; exon_number "2"; gene_type "  |
| scaffold\Cufflinks\exon | 125748 | 125809 | . | - | . | gene_id "XLOC_302170"; transcript_id "Novel_004293"; exon_number "1"; gene_type "  |
| scaffold\Cufflinks\exon | 125891 | 126034 | . | - | . | gene_id "XLOC_302170"; transcript_id "Novel_004293"; exon_number "2"; gene_type "  |
| scaffold\Cufflinks\exon | 127289 | 127354 | . | - | . | gene_id "XLOC_302170"; transcript_id "Novel_004293"; exon_number "3"; gene_type "  |
| scaffold\Cufflinks\exon | 127426 | 128368 | . | - | . | gene_id "XLOC_302170"; transcript_id "Novel_004293"; exon_number "4"; gene_type "  |
| scaffold\Cufflinks\exon | 129134 | 129263 | . | - | . | gene_id "XLOC_302170"; transcript_id "Novel_004294"; exon_number "1"; gene_type "  |
| scaffold\Cufflinks\exon | 129344 | 129390 | . | - | . | gene_id "XLOC_302170"; transcript_id "Novel_004294"; exon_number "2"; gene_type "  |
| scaffold\Cufflinks\exon | 129643 | 129721 | . | - | . | gene_id "XLOC_302170"; transcript_id "Novel_004294"; exon_number "3"; gene_type "  |
| scaffold\Cufflinks\exon | 129817 | 129896 | . | - | . | gene_id "XLOC_302170"; transcript_id "Novel_004294"; exon_number "4"; gene_type "  |
| scaffold\Cufflinks\exon | 130617 | 130706 | . | - | . | gene_id "XLOC_302170"; transcript_id "Novel_004294"; exon_number "5"; gene_type "  |
| scaffold\Cufflinks\exon | 130986 | 131094 | . | - | . | gene_id "XLOC_302170"; transcript_id "Novel_004294"; exon_number "6"; gene_type "  |
| scaffold\Cufflinks\exon | 131186 | 131280 | . | - | . | gene_id "XLOC_302170"; transcript_id "Novel_004294"; exon_number "7"; gene_type "  |
| scaffold\Cufflinks\exon | 132735 | 132794 | . | - | . | gene_id "XLOC_302170"; transcript_id "Novel_004294"; exon_number "8"; gene_type "  |
| scaffold\Cufflinks\exon | 132891 | 132947 | . | - | . | gene_id "XLOC_302170"; transcript_id "Novel_004294"; exon_number "9"; gene_type "  |
| scaffold\Cufflinks\exon | 133048 | 133178 | . | - | . | gene_id "XLOC_302170"; transcript_id "Novel_004294"; exon_number "10"; gene_type " |
| scaffold\Cufflinks\exon | 133429 | 133807 | . | - | . | gene_id "XLOC_302170"; transcript_id "Novel_004295"; exon_number "1"; gene_type "  |
| scaffold\Cufflinks\exon | 133909 | 133989 | . | - | . | gene_id "XLOC_302170"; transcript_id "Novel_004295"; exon_number "2"; gene_type "  |
| scaffold\Cufflinks\exon | 134241 | 134324 | . | - | . | gene_id "XLOC_302170"; transcript_id "Novel_004295"; exon_number "3"; gene_type "  |
| scaffold\Cufflinks\exon | 137236 | 137319 | . | - | . | gene_id "XLOC_302170"; transcript_id "Novel_004295"; exon_number "4"; gene_type "  |
| scaffold\Cufflinks\exon | 137392 | 137439 | . | - | . | gene_id "XLOC_302170"; transcript_id "Novel_004295"; exon_number "5"; gene_type "  |
| scaffold\Cufflinks\exon | 137512 | 137713 | . | - | . | gene_id "XLOC_302170"; transcript_id "Novel_004295"; exon_number "6"; gene_type "  |
| scaffold\Cufflinks\exon | 137820 | 137971 | . | - | . | gene_id "XLOC_302170"; transcript_id "Novel_004295"; exon_number "7"; gene_type "  |

|                         |        |        |   |   |                                                                                    |
|-------------------------|--------|--------|---|---|------------------------------------------------------------------------------------|
| scaffold\Cufflinks\exon | 138461 | 138559 | . | . | gene_id "XLOC_302170"; transcript_id "Novel_004295"; exon_number "8"; gene_type "  |
| scaffold\Cufflinks\exon | 138631 | 138795 | . | . | gene_id "XLOC_302170"; transcript_id "Novel_004295"; exon_number "9"; gene_type "  |
| scaffold\Cufflinks\exon | 139465 | 139587 | . | . | gene_id "XLOC_302170"; transcript_id "Novel_004295"; exon_number "10"; gene_type " |
| scaffold\Cufflinks\exon | 140895 | 140895 | . | . | gene_id "XLOC_302170"; transcript_id "Novel_004295"; exon_number "11"; gene_type " |
| scaffold\Cufflinks\exon | 133610 | 133646 | . | . | gene_id "XLOC_302170"; transcript_id "Novel_004296"; exon_number "1"; gene_type "  |
| scaffold\Cufflinks\exon | 133718 | 133807 | . | . | gene_id "XLOC_302170"; transcript_id "Novel_004296"; exon_number "2"; gene_type "  |
| scaffold\Cufflinks\exon | 133909 | 133989 | . | . | gene_id "XLOC_302170"; transcript_id "Novel_004296"; exon_number "3"; gene_type "  |
| scaffold\Cufflinks\exon | 134241 | 134324 | . | . | gene_id "XLOC_302170"; transcript_id "Novel_004296"; exon_number "4"; gene_type "  |
| scaffold\Cufflinks\exon | 137236 | 137319 | . | . | gene_id "XLOC_302170"; transcript_id "Novel_004296"; exon_number "5"; gene_type "  |
| scaffold\Cufflinks\exon | 137392 | 137439 | . | . | gene_id "XLOC_302170"; transcript_id "Novel_004296"; exon_number "6"; gene_type "  |
| scaffold\Cufflinks\exon | 137512 | 137713 | . | . | gene_id "XLOC_302170"; transcript_id "Novel_004296"; exon_number "7"; gene_type "  |
| scaffold\Cufflinks\exon | 137820 | 137971 | . | . | gene_id "XLOC_302170"; transcript_id "Novel_004296"; exon_number "8"; gene_type "  |
| scaffold\Cufflinks\exon | 138461 | 138559 | . | . | gene_id "XLOC_302170"; transcript_id "Novel_004296"; exon_number "9"; gene_type "  |
| scaffold\Cufflinks\exon | 138631 | 138795 | . | . | gene_id "XLOC_302170"; transcript_id "Novel_004296"; exon_number "10"; gene_type " |
| scaffold\Cufflinks\exon | 139465 | 139587 | . | . | gene_id "XLOC_302170"; transcript_id "Novel_004296"; exon_number "11"; gene_type " |
| scaffold\Cufflinks\exon | 140895 | 140969 | . | . | gene_id "XLOC_302170"; transcript_id "Novel_004296"; exon_number "12"; gene_type " |
| scaffold\Cufflinks\exon | 141058 | 141344 | . | . | gene_id "XLOC_302170"; transcript_id "Novel_004296"; exon_number "13"; gene_type " |
| scaffold\Cufflinks\exon | 142708 | 143211 | . | . | gene_id "XLOC_302176"; transcript_id "Novel_004297"; exon_number "1"; gene_type "  |
| scaffold\Cufflinks\exon | 143823 | 143909 | . | . | gene_id "XLOC_302176"; transcript_id "Novel_004297"; exon_number "2"; gene_type "  |
| scaffold\Cufflinks\exon | 144061 | 144165 | . | . | gene_id "XLOC_302176"; transcript_id "Novel_004297"; exon_number "3"; gene_type "  |
| scaffold\Cufflinks\exon | 144281 | 144328 | . | . | gene_id "XLOC_302176"; transcript_id "Novel_004297"; exon_number "4"; gene_type "  |
| scaffold\Cufflinks\exon | 145216 | 145323 | . | . | gene_id "XLOC_302176"; transcript_id "Novel_004297"; exon_number "5"; gene_type "  |
| scaffold\Cufflinks\exon | 146438 | 146572 | . | . | gene_id "XLOC_302176"; transcript_id "Novel_004297"; exon_number "6"; gene_type "  |
| scaffold\Cufflinks\exon | 147882 | 148005 | . | . | gene_id "XLOC_302176"; transcript_id "Novel_004297"; exon_number "7"; gene_type "  |
| scaffold\Cufflinks\exon | 148440 | 148557 | . | . | gene_id "XLOC_302176"; transcript_id "Novel_004297"; exon_number "8"; gene_type "  |
| scaffold\Cufflinks\exon | 149134 | 149203 | . | . | gene_id "XLOC_302176"; transcript_id "Novel_004297"; exon_number "9"; gene_type "  |
| scaffold\Cufflinks\exon | 150841 | 150912 | . | . | gene_id "XLOC_302176"; transcript_id "Novel_004297"; exon_number "10"; gene_type " |
| scaffold\Cufflinks\exon | 151441 | 151571 | . | . | gene_id "XLOC_302176"; transcript_id "Novel_004297"; exon_number "11"; gene_type " |
| scaffold\Cufflinks\exon | 159780 | 160115 | . | . | gene_id "XLOC_302182"; transcript_id "Novel_004298"; exon_number "1"; gene_type "  |
| scaffold\Cufflinks\exon | 161110 | 161360 | . | . | gene_id "XLOC_302182"; transcript_id "Novel_004298"; exon_number "2"; gene_type "  |
| scaffold\Cufflinks\exon | 160867 | 161271 | . | . | gene_id "XLOC_302182"; transcript_id "Novel_004299"; exon_number "1"; gene_type "  |
| scaffold\Cufflinks\exon | 161441 | 161512 | . | . | gene_id "XLOC_302182"; transcript_id "Novel_004299"; exon_number "2"; gene_type "  |
| scaffold\Cufflinks\exon | 161622 | 162234 | . | . | gene_id "XLOC_302182"; transcript_id "Novel_004299"; exon_number "3"; gene_type "  |
| scaffold\Cufflinks\exon | 163824 | 164011 | . | . | gene_id "XLOC_302182"; transcript_id "Novel_004299"; exon_number "4"; gene_type "  |
| scaffold\Cufflinks\exon | 164096 | 164185 | . | . | gene_id "XLOC_302182"; transcript_id "Novel_004299"; exon_number "5"; gene_type "  |



|                         |        |        |   |   |   |                                                                                   |
|-------------------------|--------|--------|---|---|---|-----------------------------------------------------------------------------------|
| scaffold\Cufflinks\exon | 16193  | 16220  | . | + | . | gene_id "XLOC_302499"; transcript_id "Novel_004307"; exon_number "3"; gene_type " |
| scaffold\Cufflinks\exon | 16344  | 16426  | . | + | . | gene_id "XLOC_302499"; transcript_id "Novel_004307"; exon_number "4"; gene_type " |
| scaffold\Cufflinks\exon | 16516  | 16548  | . | + | . | gene_id "XLOC_302499"; transcript_id "Novel_004307"; exon_number "5"; gene_type " |
| scaffold\Cufflinks\exon | 16790  | 16868  | . | + | . | gene_id "XLOC_302499"; transcript_id "Novel_004307"; exon_number "6"; gene_type " |
| scaffold\Cufflinks\exon | 16980  | 17032  | . | + | . | gene_id "XLOC_302499"; transcript_id "Novel_004307"; exon_number "7"; gene_type " |
| scaffold\Cufflinks\exon | 17733  | 17793  | . | + | . | gene_id "XLOC_302499"; transcript_id "Novel_004307"; exon_number "8"; gene_type " |
| scaffold\Cufflinks\exon | 17900  | 17948  | . | + | . | gene_id "XLOC_302499"; transcript_id "Novel_004307"; exon_number "9"; gene_type " |
| scaffold\Cufflinks\exon | 346851 | 347180 | . | + | . | gene_id "XLOC_302544"; transcript_id "Novel_004308"; exon_number "1"; gene_type " |
| scaffold\Cufflinks\exon | 347354 | 347566 | . | + | . | gene_id "XLOC_302544"; transcript_id "Novel_004308"; exon_number "2"; gene_type " |
| scaffold\Cufflinks\exon | 348008 | 348672 | . | + | . | gene_id "XLOC_302544"; transcript_id "Novel_004308"; exon_number "3"; gene_type " |
| scaffold\Cufflinks\exon | 555446 | 555554 | . | + | . | gene_id "XLOC_302566"; transcript_id "Novel_004309"; exon_number "1"; gene_type " |
| scaffold\Cufflinks\exon | 555828 | 555990 | . | + | . | gene_id "XLOC_302566"; transcript_id "Novel_004309"; exon_number "2"; gene_type " |
| scaffold\Cufflinks\exon | 556082 | 556766 | . | + | . | gene_id "XLOC_302566"; transcript_id "Novel_004309"; exon_number "3"; gene_type " |
| scaffold\Cufflinks\exon | 627377 | 629563 | . | + | . | gene_id "XLOC_302574"; transcript_id "Novel_004310"; exon_number "1"; gene_type " |
| scaffold\Cufflinks\exon | 629796 | 629953 | . | + | . | gene_id "XLOC_302574"; transcript_id "Novel_004310"; exon_number "2"; gene_type " |
| scaffold\Cufflinks\exon | 630491 | 630634 | . | + | . | gene_id "XLOC_302574"; transcript_id "Novel_004310"; exon_number "3"; gene_type " |
| scaffold\Cufflinks\exon | 630758 | 631256 | . | + | . | gene_id "XLOC_302574"; transcript_id "Novel_004310"; exon_number "4"; gene_type " |
| scaffold\Cufflinks\exon | 627392 | 628908 | . | + | . | gene_id "XLOC_302574"; transcript_id "Novel_004311"; exon_number "1"; gene_type " |
| scaffold\Cufflinks\exon | 629004 | 629563 | . | + | . | gene_id "XLOC_302574"; transcript_id "Novel_004311"; exon_number "2"; gene_type " |
| scaffold\Cufflinks\exon | 629796 | 629953 | . | + | . | gene_id "XLOC_302574"; transcript_id "Novel_004311"; exon_number "3"; gene_type " |
| scaffold\Cufflinks\exon | 630491 | 630634 | . | + | . | gene_id "XLOC_302574"; transcript_id "Novel_004311"; exon_number "4"; gene_type " |
| scaffold\Cufflinks\exon | 630758 | 630920 | . | + | . | gene_id "XLOC_302574"; transcript_id "Novel_004311"; exon_number "5"; gene_type " |
| scaffold\Cufflinks\exon | 631117 | 633081 | . | + | . | gene_id "XLOC_302574"; transcript_id "Novel_004311"; exon_number "6"; gene_type " |
| scaffold\Cufflinks\exon | 24949  | 26050  | . | - | . | gene_id "XLOC_302585"; transcript_id "Novel_004312"; exon_number "1"; gene_type " |
| scaffold\Cufflinks\exon | 26741  | 26872  | . | - | . | gene_id "XLOC_302585"; transcript_id "Novel_004312"; exon_number "2"; gene_type " |
| scaffold\Cufflinks\exon | 27186  | 27708  | . | - | . | gene_id "XLOC_302585"; transcript_id "Novel_004312"; exon_number "3"; gene_type " |
| scaffold\Cufflinks\exon | 185569 | 187125 | . | - | . | gene_id "XLOC_302608"; transcript_id "Novel_004313"; exon_number "1"; gene_type " |
| scaffold\Cufflinks\exon | 187210 | 187926 | . | - | . | gene_id "XLOC_302608"; transcript_id "Novel_004313"; exon_number "2"; gene_type " |
| scaffold\Cufflinks\exon | 215013 | 215344 | . | - | . | gene_id "XLOC_302612"; transcript_id "Novel_004314"; exon_number "1"; gene_type " |
| scaffold\Cufflinks\exon | 215445 | 215522 | . | - | . | gene_id "XLOC_302612"; transcript_id "Novel_004314"; exon_number "2"; gene_type " |
| scaffold\Cufflinks\exon | 215672 | 215777 | . | - | . | gene_id "XLOC_302612"; transcript_id "Novel_004314"; exon_number "3"; gene_type " |
| scaffold\Cufflinks\exon | 215874 | 216032 | . | - | . | gene_id "XLOC_302612"; transcript_id "Novel_004314"; exon_number "4"; gene_type " |
| scaffold\Cufflinks\exon | 255894 | 256092 | . | - | . | gene_id "XLOC_302622"; transcript_id "Novel_004315"; exon_number "1"; gene_type " |
| scaffold\Cufflinks\exon | 256201 | 256274 | . | - | . | gene_id "XLOC_302622"; transcript_id "Novel_004315"; exon_number "2"; gene_type " |
| scaffold\Cufflinks\exon | 256748 | 257090 | . | - | . | gene_id "XLOC_302622"; transcript_id "Novel_004316"; exon_number "1"; gene_type " |

|                         |        |        |   |   |   |                                                                                   |
|-------------------------|--------|--------|---|---|---|-----------------------------------------------------------------------------------|
| scaffold\Cufflinks\exon | 257192 | 257501 | . | - | . | gene_id "XLOC_302622"; transcript_id "Novel_004316"; exon_number "2"; gene_type " |
| scaffold\Cufflinks\exon | 348330 | 348738 | . | - | . | gene_id "XLOC_302629"; transcript_id "Novel_004317"; exon_number "1"; gene_type " |
| scaffold\Cufflinks\exon | 348830 | 349002 | . | - | . | gene_id "XLOC_302629"; transcript_id "Novel_004317"; exon_number "2"; gene_type " |
| scaffold\Cufflinks\exon | 349195 | 349281 | . | - | . | gene_id "XLOC_302629"; transcript_id "Novel_004317"; exon_number "3"; gene_type " |
| scaffold\Cufflinks\exon | 349399 | 349653 | . | - | . | gene_id "XLOC_302629"; transcript_id "Novel_004317"; exon_number "4"; gene_type " |
| scaffold\Cufflinks\exon | 349793 | 350004 | . | - | . | gene_id "XLOC_302629"; transcript_id "Novel_004317"; exon_number "5"; gene_type " |
| scaffold\Cufflinks\exon | 350132 | 350234 | . | - | . | gene_id "XLOC_302629"; transcript_id "Novel_004317"; exon_number "6"; gene_type " |
| scaffold\Cufflinks\exon | 348336 | 348738 | . | - | . | gene_id "XLOC_302629"; transcript_id "Novel_004318"; exon_number "1"; gene_type " |
| scaffold\Cufflinks\exon | 348830 | 349002 | . | - | . | gene_id "XLOC_302629"; transcript_id "Novel_004318"; exon_number "2"; gene_type " |
| scaffold\Cufflinks\exon | 349195 | 349653 | . | - | . | gene_id "XLOC_302629"; transcript_id "Novel_004318"; exon_number "3"; gene_type " |
| scaffold\Cufflinks\exon | 349793 | 350245 | . | - | . | gene_id "XLOC_302629"; transcript_id "Novel_004318"; exon_number "4"; gene_type " |
| scaffold\Cufflinks\exon | 348380 | 348738 | . | - | . | gene_id "XLOC_302629"; transcript_id "Novel_004319"; exon_number "1"; gene_type " |
| scaffold\Cufflinks\exon | 348830 | 349002 | . | - | . | gene_id "XLOC_302629"; transcript_id "Novel_004319"; exon_number "2"; gene_type " |
| scaffold\Cufflinks\exon | 349195 | 349258 | . | - | . | gene_id "XLOC_302629"; transcript_id "Novel_004319"; exon_number "3"; gene_type " |
| scaffold\Cufflinks\exon | 349399 | 349653 | . | - | . | gene_id "XLOC_302629"; transcript_id "Novel_004319"; exon_number "4"; gene_type " |
| scaffold\Cufflinks\exon | 349793 | 350158 | . | - | . | gene_id "XLOC_302629"; transcript_id "Novel_004319"; exon_number "5"; gene_type " |
| scaffold\Cufflinks\exon | 600335 | 600922 | . | - | . | gene_id "XLOC_302660"; transcript_id "Novel_004320"; exon_number "1"; gene_type " |
| scaffold\Cufflinks\exon | 601033 | 601225 | . | - | . | gene_id "XLOC_302660"; transcript_id "Novel_004320"; exon_number "2"; gene_type " |
| scaffold\Cufflinks\exon | 593236 | 593375 | . | + | . | gene_id "XLOC_302746"; transcript_id "Novel_004321"; exon_number "1"; gene_type " |
| scaffold\Cufflinks\exon | 593523 | 593602 | . | + | . | gene_id "XLOC_302746"; transcript_id "Novel_004321"; exon_number "2"; gene_type " |
| scaffold\Cufflinks\exon | 552753 | 556069 | . | - | . | gene_id "XLOC_302812"; transcript_id "Novel_004322"; exon_number "1"; gene_type " |
| scaffold\Cufflinks\exon | 556171 | 556979 | . | - | . | gene_id "XLOC_302812"; transcript_id "Novel_004322"; exon_number "2"; gene_type " |
| scaffold\Cufflinks\exon | 519508 | 519735 | . | + | . | gene_id "XLOC_303073"; transcript_id "Novel_004323"; exon_number "1"; gene_type " |
| scaffold\Cufflinks\exon | 299180 | 299507 | . | + | . | gene_id "XLOC_303214"; transcript_id "Novel_004324"; exon_number "1"; gene_type " |
| scaffold\Cufflinks\exon | 299997 | 300160 | . | + | . | gene_id "XLOC_303214"; transcript_id "Novel_004324"; exon_number "2"; gene_type " |
| scaffold\Cufflinks\exon | 300767 | 301032 | . | + | . | gene_id "XLOC_303214"; transcript_id "Novel_004324"; exon_number "3"; gene_type " |
| scaffold\Cufflinks\exon | 507794 | 508398 | . | - | . | gene_id "XLOC_303297"; transcript_id "Novel_004325"; exon_number "1"; gene_type " |
| scaffold\Cufflinks\exon | 509589 | 509818 | . | - | . | gene_id "XLOC_303297"; transcript_id "Novel_004325"; exon_number "2"; gene_type " |
| scaffold\Cufflinks\exon | 510089 | 510422 | . | - | . | gene_id "XLOC_303297"; transcript_id "Novel_004325"; exon_number "3"; gene_type " |
| scaffold\Cufflinks\exon | 507901 | 509818 | . | - | . | gene_id "XLOC_303297"; transcript_id "Novel_004326"; exon_number "1"; gene_type " |
| scaffold\Cufflinks\exon | 510089 | 510435 | . | - | . | gene_id "XLOC_303297"; transcript_id "Novel_004326"; exon_number "2"; gene_type " |
| scaffold\Cufflinks\exon | 508071 | 508571 | . | - | . | gene_id "XLOC_303297"; transcript_id "Novel_004327"; exon_number "1"; gene_type " |
| scaffold\Cufflinks\exon | 509589 | 509818 | . | - | . | gene_id "XLOC_303297"; transcript_id "Novel_004327"; exon_number "2"; gene_type " |
| scaffold\Cufflinks\exon | 510089 | 510435 | . | - | . | gene_id "XLOC_303297"; transcript_id "Novel_004327"; exon_number "3"; gene_type " |
| scaffold\Cufflinks\exon | 141020 | 141162 | . | + | . | gene_id "XLOC_303797"; transcript_id "Novel_004328"; exon_number "1"; gene_type " |



|                         |        |        |   |   |   |                                                                                    |
|-------------------------|--------|--------|---|---|---|------------------------------------------------------------------------------------|
| scaffold\Cufflinks\exon | 141748 | 141861 | . | + | . | gene_id "XLOC_303797"; transcript_id "Novel_004328"; exon_number "2"; gene_type "  |
| scaffold\Cufflinks\exon | 141946 | 142026 | . | + | . | gene_id "XLOC_303797"; transcript_id "Novel_004328"; exon_number "3"; gene_type "  |
| scaffold\Cufflinks\exon | 143286 | 143342 | . | + | . | gene_id "XLOC_303797"; transcript_id "Novel_004328"; exon_number "4"; gene_type "  |
| scaffold\Cufflinks\exon | 144147 | 144279 | . | + | . | gene_id "XLOC_303797"; transcript_id "Novel_004328"; exon_number "5"; gene_type "  |
| scaffold\Cufflinks\exon | 144687 | 144782 | . | + | . | gene_id "XLOC_303797"; transcript_id "Novel_004328"; exon_number "6"; gene_type "  |
| scaffold\Cufflinks\exon | 144865 | 145345 | . | + | . | gene_id "XLOC_303797"; transcript_id "Novel_004328"; exon_number "7"; gene_type "  |
| scaffold\Cufflinks\exon | 379582 | 380686 | . | - | . | gene_id "XLOC_303914"; transcript_id "Novel_004329"; exon_number "1"; gene_type "  |
| scaffold\Cufflinks\exon | 380765 | 380997 | . | - | . | gene_id "XLOC_303914"; transcript_id "Novel_004329"; exon_number "2"; gene_type "  |
| scaffold\Cufflinks\exon | 312378 | 312697 | . | + | . | gene_id "XLOC_303978"; transcript_id "Novel_004330"; exon_number "1"; gene_type "  |
| scaffold\Cufflinks\exon | 313395 | 313504 | . | + | . | gene_id "XLOC_303978"; transcript_id "Novel_004330"; exon_number "2"; gene_type "  |
| scaffold\Cufflinks\exon | 313579 | 313897 | . | + | . | gene_id "XLOC_303978"; transcript_id "Novel_004330"; exon_number "3"; gene_type "  |
| scaffold\Cufflinks\exon | 314512 | 314553 | . | + | . | gene_id "XLOC_303978"; transcript_id "Novel_004330"; exon_number "4"; gene_type "  |
| scaffold\Cufflinks\exon | 314693 | 314801 | . | + | . | gene_id "XLOC_303978"; transcript_id "Novel_004331"; exon_number "1"; gene_type "  |
| scaffold\Cufflinks\exon | 315135 | 315500 | . | + | . | gene_id "XLOC_303978"; transcript_id "Novel_004331"; exon_number "2"; gene_type "  |
| scaffold\Cufflinks\exon | 315658 | 315826 | . | + | . | gene_id "XLOC_303978"; transcript_id "Novel_004331"; exon_number "3"; gene_type "  |
| scaffold\Cufflinks\exon | 315991 | 316202 | . | + | . | gene_id "XLOC_303978"; transcript_id "Novel_004331"; exon_number "4"; gene_type "  |
| scaffold\Cufflinks\exon | 316373 | 317312 | . | + | . | gene_id "XLOC_303978"; transcript_id "Novel_004331"; exon_number "5"; gene_type "  |
| scaffold\Cufflinks\exon | 317528 | 317763 | . | + | . | gene_id "XLOC_303978"; transcript_id "Novel_004332"; exon_number "1"; gene_type "  |
| scaffold\Cufflinks\exon | 317837 | 317903 | . | + | . | gene_id "XLOC_303978"; transcript_id "Novel_004332"; exon_number "2"; gene_type "  |
| scaffold\Cufflinks\exon | 318130 | 318290 | . | + | . | gene_id "XLOC_303978"; transcript_id "Novel_004332"; exon_number "3"; gene_type "  |
| scaffold\Cufflinks\exon | 318465 | 318638 | . | + | . | gene_id "XLOC_303978"; transcript_id "Novel_004332"; exon_number "4"; gene_type "  |
| scaffold\Cufflinks\exon | 318765 | 318893 | . | + | . | gene_id "XLOC_303978"; transcript_id "Novel_004332"; exon_number "5"; gene_type "  |
| scaffold\Cufflinks\exon | 318988 | 319071 | . | + | . | gene_id "XLOC_303978"; transcript_id "Novel_004332"; exon_number "6"; gene_type "  |
| scaffold\Cufflinks\exon | 319663 | 319724 | . | + | . | gene_id "XLOC_303978"; transcript_id "Novel_004332"; exon_number "7"; gene_type "  |
| scaffold\Cufflinks\exon | 319800 | 319872 | . | + | . | gene_id "XLOC_303978"; transcript_id "Novel_004332"; exon_number "8"; gene_type "  |
| scaffold\Cufflinks\exon | 319978 | 320112 | . | + | . | gene_id "XLOC_303978"; transcript_id "Novel_004332"; exon_number "9"; gene_type "  |
| scaffold\Cufflinks\exon | 320410 | 320515 | . | + | . | gene_id "XLOC_303978"; transcript_id "Novel_004332"; exon_number "10"; gene_type " |
| scaffold\Cufflinks\exon | 320319 | 320944 | . | + | . | gene_id "XLOC_303978"; transcript_id "Novel_004333"; exon_number "1"; gene_type "  |
| scaffold\Cufflinks\exon | 321912 | 322114 | . | + | . | gene_id "XLOC_303978"; transcript_id "Novel_004333"; exon_number "2"; gene_type "  |
| scaffold\Cufflinks\exon | 243443 | 245163 | . | - | . | gene_id "XLOC_304060"; transcript_id "Novel_004334"; exon_number "1"; gene_type "  |
| scaffold\Cufflinks\exon | 245539 | 245664 | . | - | . | gene_id "XLOC_304060"; transcript_id "Novel_004334"; exon_number "2"; gene_type "  |
| scaffold\Cufflinks\exon | 243443 | 244478 | . | - | . | gene_id "XLOC_304060"; transcript_id "Novel_004335"; exon_number "1"; gene_type "  |
| scaffold\Cufflinks\exon | 245057 | 245163 | . | - | . | gene_id "XLOC_304060"; transcript_id "Novel_004335"; exon_number "2"; gene_type "  |
| scaffold\Cufflinks\exon | 245539 | 245664 | . | - | . | gene_id "XLOC_304060"; transcript_id "Novel_004335"; exon_number "3"; gene_type "  |
| scaffold\Cufflinks\exon | 198736 | 198800 | . | + | . | gene_id "XLOC_304145"; transcript_id "Novel_004336"; exon_number "1"; gene_type "  |

|                         |        |        |   |   |   |                                                                                    |
|-------------------------|--------|--------|---|---|---|------------------------------------------------------------------------------------|
| scaffold\Cufflinks\exon | 199322 | 200678 | . | + | . | gene_id "XLOC_304145"; transcript_id "Novel_004336"; exon_number "2"; gene_type "  |
| scaffold\Cufflinks\exon | 133697 | 133914 | . | - | . | gene_id "XLOC_304221"; transcript_id "Novel_004337"; exon_number "1"; gene_type "  |
| scaffold\Cufflinks\exon | 134027 | 134135 | . | - | . | gene_id "XLOC_304221"; transcript_id "Novel_004337"; exon_number "2"; gene_type "  |
| scaffold\Cufflinks\exon | 19026  | 19260  | . | + | . | gene_id "XLOC_304295"; transcript_id "Novel_004338"; exon_number "1"; gene_type "  |
| scaffold\Cufflinks\exon | 20184  | 20279  | . | + | . | gene_id "XLOC_304295"; transcript_id "Novel_004338"; exon_number "2"; gene_type "  |
| scaffold\Cufflinks\exon | 21135  | 21217  | . | + | . | gene_id "XLOC_304295"; transcript_id "Novel_004338"; exon_number "3"; gene_type "  |
| scaffold\Cufflinks\exon | 21390  | 21474  | . | + | . | gene_id "XLOC_304295"; transcript_id "Novel_004338"; exon_number "4"; gene_type "  |
| scaffold\Cufflinks\exon | 21564  | 21650  | . | + | . | gene_id "XLOC_304295"; transcript_id "Novel_004338"; exon_number "5"; gene_type "  |
| scaffold\Cufflinks\exon | 21951  | 22012  | . | + | . | gene_id "XLOC_304295"; transcript_id "Novel_004338"; exon_number "6"; gene_type "  |
| scaffold\Cufflinks\exon | 22100  | 22895  | . | + | . | gene_id "XLOC_304295"; transcript_id "Novel_004338"; exon_number "7"; gene_type "  |
| scaffold\Cufflinks\exon | 23446  | 23484  | . | + | . | gene_id "XLOC_304295"; transcript_id "Novel_004338"; exon_number "8"; gene_type "  |
| scaffold\Cufflinks\exon | 23591  | 23652  | . | + | . | gene_id "XLOC_304295"; transcript_id "Novel_004338"; exon_number "9"; gene_type "  |
| scaffold\Cufflinks\exon | 23772  | 23808  | . | + | . | gene_id "XLOC_304295"; transcript_id "Novel_004338"; exon_number "10"; gene_type " |
| scaffold\Cufflinks\exon | 25105  | 25154  | . | + | . | gene_id "XLOC_304295"; transcript_id "Novel_004338"; exon_number "11"; gene_type " |
| scaffold\Cufflinks\exon | 25271  | 25337  | . | + | . | gene_id "XLOC_304295"; transcript_id "Novel_004338"; exon_number "12"; gene_type " |
| scaffold\Cufflinks\exon | 26022  | 26094  | . | + | . | gene_id "XLOC_304295"; transcript_id "Novel_004338"; exon_number "13"; gene_type " |
| scaffold\Cufflinks\exon | 26582  | 26661  | . | + | . | gene_id "XLOC_304295"; transcript_id "Novel_004338"; exon_number "14"; gene_type " |
| scaffold\Cufflinks\exon | 26751  | 26819  | . | + | . | gene_id "XLOC_304295"; transcript_id "Novel_004338"; exon_number "15"; gene_type " |
| scaffold\Cufflinks\exon | 27021  | 27516  | . | + | . | gene_id "XLOC_304295"; transcript_id "Novel_004338"; exon_number "16"; gene_type " |
| scaffold\Cufflinks\exon | 159979 | 160022 | . | + | . | gene_id "XLOC_304311"; transcript_id "Novel_004339"; exon_number "1"; gene_type "  |
| scaffold\Cufflinks\exon | 161270 | 161447 | . | + | . | gene_id "XLOC_304311"; transcript_id "Novel_004339"; exon_number "2"; gene_type "  |
| scaffold\Cufflinks\exon | 161592 | 162471 | . | + | . | gene_id "XLOC_304311"; transcript_id "Novel_004339"; exon_number "3"; gene_type "  |
| scaffold\Cufflinks\exon | 282631 | 282741 | . | + | . | gene_id "XLOC_304337"; transcript_id "Novel_004340"; exon_number "1"; gene_type "  |
| scaffold\Cufflinks\exon | 282902 | 283049 | . | + | . | gene_id "XLOC_304337"; transcript_id "Novel_004340"; exon_number "2"; gene_type "  |
| scaffold\Cufflinks\exon | 285186 | 285931 | . | + | . | gene_id "XLOC_304337"; transcript_id "Novel_004340"; exon_number "3"; gene_type "  |
| scaffold\Cufflinks\exon | 287705 | 287977 | . | + | . | gene_id "XLOC_304342"; transcript_id "Novel_004341"; exon_number "1"; gene_type "  |
| scaffold\Cufflinks\exon | 288438 | 288645 | . | + | . | gene_id "XLOC_304342"; transcript_id "Novel_004341"; exon_number "2"; gene_type "  |
| scaffold\Cufflinks\exon | 289287 | 289393 | . | + | . | gene_id "XLOC_304342"; transcript_id "Novel_004341"; exon_number "3"; gene_type "  |
| scaffold\Cufflinks\exon | 290136 | 290372 | . | + | . | gene_id "XLOC_304342"; transcript_id "Novel_004341"; exon_number "4"; gene_type "  |
| scaffold\Cufflinks\exon | 290489 | 290570 | . | + | . | gene_id "XLOC_304342"; transcript_id "Novel_004341"; exon_number "5"; gene_type "  |
| scaffold\Cufflinks\exon | 290252 | 290372 | . | + | . | gene_id "XLOC_304342"; transcript_id "Novel_004342"; exon_number "1"; gene_type "  |
| scaffold\Cufflinks\exon | 290489 | 290578 | . | + | . | gene_id "XLOC_304342"; transcript_id "Novel_004342"; exon_number "2"; gene_type "  |
| scaffold\Cufflinks\exon | 290659 | 290746 | . | + | . | gene_id "XLOC_304342"; transcript_id "Novel_004342"; exon_number "3"; gene_type "  |
| scaffold\Cufflinks\exon | 291353 | 291417 | . | + | . | gene_id "XLOC_304342"; transcript_id "Novel_004342"; exon_number "4"; gene_type "  |
| scaffold\Cufflinks\exon | 291610 | 291714 | . | + | . | gene_id "XLOC_304342"; transcript_id "Novel_004342"; exon_number "5"; gene_type "  |

|                         |        |        |   |   |   |                                                                                    |
|-------------------------|--------|--------|---|---|---|------------------------------------------------------------------------------------|
| scaffold\Cufflinks\exon | 292345 | 292434 | . | + | . | gene_id "XLOC_304342"; transcript_id "Novel_004342"; exon_number "6"; gene_type "  |
| scaffold\Cufflinks\exon | 292561 | 292641 | . | + | . | gene_id "XLOC_304342"; transcript_id "Novel_004342"; exon_number "7"; gene_type "  |
| scaffold\Cufflinks\exon | 298539 | 298607 | . | + | . | gene_id "XLOC_304342"; transcript_id "Novel_004342"; exon_number "8"; gene_type "  |
| scaffold\Cufflinks\exon | 298944 | 299560 | . | + | . | gene_id "XLOC_304342"; transcript_id "Novel_004342"; exon_number "9"; gene_type "  |
| scaffold\Cufflinks\exon | 301037 | 302697 | . | + | . | gene_id "XLOC_304342"; transcript_id "Novel_004343"; exon_number "1"; gene_type "  |
| scaffold\Cufflinks\exon | 302821 | 302927 | . | + | . | gene_id "XLOC_304342"; transcript_id "Novel_004343"; exon_number "2"; gene_type "  |
| scaffold\Cufflinks\exon | 305437 | 305547 | . | + | . | gene_id "XLOC_304342"; transcript_id "Novel_004343"; exon_number "3"; gene_type "  |
| scaffold\Cufflinks\exon | 305699 | 305866 | . | + | . | gene_id "XLOC_304342"; transcript_id "Novel_004343"; exon_number "4"; gene_type "  |
| scaffold\Cufflinks\exon | 306014 | 306100 | . | + | . | gene_id "XLOC_304342"; transcript_id "Novel_004343"; exon_number "5"; gene_type "  |
| scaffold\Cufflinks\exon | 306258 | 306757 | . | + | . | gene_id "XLOC_304342"; transcript_id "Novel_004343"; exon_number "6"; gene_type "  |
| scaffold\Cufflinks\exon | 307940 | 308329 | . | + | . | gene_id "XLOC_304342"; transcript_id "Novel_004344"; exon_number "1"; gene_type "  |
| scaffold\Cufflinks\exon | 309081 | 309237 | . | + | . | gene_id "XLOC_304342"; transcript_id "Novel_004344"; exon_number "2"; gene_type "  |
| scaffold\Cufflinks\exon | 309814 | 309963 | . | + | . | gene_id "XLOC_304342"; transcript_id "Novel_004344"; exon_number "3"; gene_type "  |
| scaffold\Cufflinks\exon | 310099 | 310148 | . | + | . | gene_id "XLOC_304342"; transcript_id "Novel_004344"; exon_number "4"; gene_type "  |
| scaffold\Cufflinks\exon | 310295 | 310394 | . | + | . | gene_id "XLOC_304342"; transcript_id "Novel_004344"; exon_number "5"; gene_type "  |
| scaffold\Cufflinks\exon | 310482 | 310538 | . | + | . | gene_id "XLOC_304342"; transcript_id "Novel_004344"; exon_number "6"; gene_type "  |
| scaffold\Cufflinks\exon | 310643 | 310689 | . | + | . | gene_id "XLOC_304342"; transcript_id "Novel_004344"; exon_number "7"; gene_type "  |
| scaffold\Cufflinks\exon | 327693 | 327812 | . | + | . | gene_id "XLOC_304342"; transcript_id "Novel_004345"; exon_number "1"; gene_type "  |
| scaffold\Cufflinks\exon | 328141 | 329309 | . | + | . | gene_id "XLOC_304342"; transcript_id "Novel_004345"; exon_number "2"; gene_type "  |
| scaffold\Cufflinks\exon | 519215 | 519388 | . | + | . | gene_id "XLOC_304382"; transcript_id "Novel_004346"; exon_number "1"; gene_type "  |
| scaffold\Cufflinks\exon | 519517 | 519785 | . | + | . | gene_id "XLOC_304382"; transcript_id "Novel_004346"; exon_number "2"; gene_type "  |
| scaffold\Cufflinks\exon | 521054 | 521168 | . | + | . | gene_id "XLOC_304382"; transcript_id "Novel_004346"; exon_number "3"; gene_type "  |
| scaffold\Cufflinks\exon | 521616 | 521683 | . | + | . | gene_id "XLOC_304382"; transcript_id "Novel_004346"; exon_number "4"; gene_type "  |
| scaffold\Cufflinks\exon | 521840 | 521972 | . | + | . | gene_id "XLOC_304382"; transcript_id "Novel_004346"; exon_number "5"; gene_type "  |
| scaffold\Cufflinks\exon | 522059 | 522158 | . | + | . | gene_id "XLOC_304382"; transcript_id "Novel_004346"; exon_number "6"; gene_type "  |
| scaffold\Cufflinks\exon | 522238 | 522350 | . | + | . | gene_id "XLOC_304382"; transcript_id "Novel_004346"; exon_number "7"; gene_type "  |
| scaffold\Cufflinks\exon | 523290 | 523383 | . | + | . | gene_id "XLOC_304382"; transcript_id "Novel_004346"; exon_number "8"; gene_type "  |
| scaffold\Cufflinks\exon | 523494 | 523647 | . | + | . | gene_id "XLOC_304382"; transcript_id "Novel_004346"; exon_number "9"; gene_type "  |
| scaffold\Cufflinks\exon | 524221 | 524367 | . | + | . | gene_id "XLOC_304382"; transcript_id "Novel_004346"; exon_number "10"; gene_type " |
| scaffold\Cufflinks\exon | 524467 | 524540 | . | + | . | gene_id "XLOC_304382"; transcript_id "Novel_004346"; exon_number "11"; gene_type " |
| scaffold\Cufflinks\exon | 525683 | 525771 | . | + | . | gene_id "XLOC_304382"; transcript_id "Novel_004346"; exon_number "12"; gene_type " |
| scaffold\Cufflinks\exon | 525896 | 526010 | . | + | . | gene_id "XLOC_304382"; transcript_id "Novel_004346"; exon_number "13"; gene_type " |
| scaffold\Cufflinks\exon | 526421 | 526923 | . | + | . | gene_id "XLOC_304382"; transcript_id "Novel_004346"; exon_number "14"; gene_type " |
| scaffold\Cufflinks\exon | 139566 | 141272 | . | - | . | gene_id "XLOC_304411"; transcript_id "Novel_004347"; exon_number "1"; gene_type "  |
| scaffold\Cufflinks\exon | 142065 | 142974 | . | - | . | gene_id "XLOC_304411"; transcript_id "Novel_004347"; exon_number "2"; gene_type "  |

|                    |      |        |        |   |   |   |                                                                                   |
|--------------------|------|--------|--------|---|---|---|-----------------------------------------------------------------------------------|
| scaffold9Cufflinks | exon | 450913 | 452822 | . | - | . | gene_id "XLOC_304435"; transcript_id "Novel_004348"; exon_number "1"; gene_type " |
| scaffold9Cufflinks | exon | 604656 | 605047 | . | - | . | gene_id "XLOC_304458"; transcript_id "Novel_004349"; exon_number "1"; gene_type " |
| scaffold9Cufflinks | exon | 605136 | 605159 | . | - | . | gene_id "XLOC_304458"; transcript_id "Novel_004349"; exon_number "2"; gene_type " |
| scaffold9Cufflinks | exon | 316    | 436    | . | - | . | gene_id "XLOC_304711"; transcript_id "Novel_004350"; exon_number "1"; gene_type " |
| scaffold9Cufflinks | exon | 567    | 694    | . | - | . | gene_id "XLOC_304711"; transcript_id "Novel_004350"; exon_number "2"; gene_type " |



protein\_coding"; old "TCONS\_00000100";  
protein\_coding"; old "TCONS\_00018897";  
protein\_coding"; old "TCONS\_00018897";  
protein\_coding"; old "TCONS\_00018897";  
protein\_coding"; old "TCONS\_00018897";  
protein\_coding"; old "TCONS\_00006252";  
protein\_coding"; old "TCONS\_00000109";  
protein\_coding"; old "TCONS\_00000109";  
protein\_coding"; old "TCONS\_00000113";  
protein\_coding"; old "TCONS\_00000113";  
protein\_coding"; old "TCONS\_00000113";  
protein\_coding"; old "TCONS\_00033834";  
protein\_coding"; old "TCONS\_00033834";  
protein\_coding"; old "TCONS\_00000123";  
protein\_coding"; old "TCONS\_00000123";  
protein\_coding"; old "TCONS\_00000124";  
protein\_coding"; old "TCONS\_00000124";  
protein\_coding"; old "TCONS\_00000124";  
protein\_coding"; old "TCONS\_00006270";  
protein\_coding"; old "TCONS\_00006270";  
protein\_coding"; old "TCONS\_00006270";  
protein\_coding"; old "TCONS\_00030226";  
protein\_coding"; old "TCONS\_00030226";  
protein\_coding"; old "TCONS\_00030226";  
protein\_coding"; old "TCONS\_00018923";  
protein\_coding"; old "TCONS\_00018923";  
protein\_coding"; old "TCONS\_00018923";



"protein\_coding"; old "TCONS\_00006276";  
"protein\_coding"; old "TCONS\_00006276";  
"protein\_coding"; old "TCONS\_00006276";  
"protein\_coding"; old "TCONS\_00006276";  
protein\_coding"; old "TCONS\_00018925";  
protein\_coding"; old "TCONS\_00000153";  
protein\_coding"; old "TCONS\_00000199";  
protein\_coding"; old "TCONS\_00006323";  
protein\_coding"; old "TCONS\_00006323";  
protein\_coding"; old "TCONS\_00006323";  
protein\_coding"; old "TCONS\_00000222";  
protein\_coding"; old "TCONS\_00000222";  
protein\_coding"; old "TCONS\_00000268";  
protein\_coding"; old "TCONS\_00006402";  
protein\_coding"; old "TCONS\_00006402";  
protein\_coding"; old "TCONS\_00000278";  
protein\_coding"; old "TCONS\_00006433";  
protein\_coding"; old "TCONS\_00006433";  
protein\_coding"; old "TCONS\_00023074";  
protein\_coding"; old "TCONS\_00011839";  
protein\_coding"; old "TCONS\_00011839";  
protein\_coding"; old "TCONS\_00011839";  
protein\_coding"; old "TCONS\_00000353";  
protein\_coding"; old "TCONS\_00000353";  
protein\_coding"; old "TCONS\_00000353";  
protein\_coding"; old "TCONS\_00000353";  
protein\_coding"; old "TCONS\_00023077";  
protein\_coding"; old "TCONS\_00023077";





protein\_coding"; old "TCONS\_00011861";  
protein\_coding"; old "TCONS\_00011861";  
protein\_coding"; old "TCONS\_00011861";  
"protein\_coding"; old "TCONS\_00011861";  
"protein\_coding"; old "TCONS\_00011861";  
"protein\_coding"; old "TCONS\_00011861";  
protein\_coding"; old "TCONS\_00011862";  
"protein\_coding"; old "TCONS\_00011862";  
"protein\_coding"; old "TCONS\_00011862";  
"protein\_coding"; old "TCONS\_00011862";  
protein\_coding"; old "TCONS\_00006464";  
protein\_coding"; old "TCONS\_00006464";  
protein\_coding"; old "TCONS\_00006464";  
protein\_coding"; old "TCONS\_00011868";  
protein\_coding"; old "TCONS\_00011868";  
protein\_coding"; old "TCONS\_00000378";  
protein\_coding"; old "TCONS\_00000378";  
protein\_coding"; old "TCONS\_00006476";  
protein\_coding"; old "TCONS\_00006476";  
protein\_coding"; old "TCONS\_00026664";  
protein\_coding"; old "TCONS\_00026664";  
protein\_coding"; old "TCONS\_00011874";  
protein\_coding"; old "TCONS\_00011874";  
protein\_coding"; old "TCONS\_00011874";  
protein\_coding"; old "TCONS\_00000381";  
protein\_coding"; old "TCONS\_00000381";  
protein\_coding"; old "TCONS\_00000381";

protein\_coding"; old "TCONS\_00000381";  
protein\_coding"; old "TCONS\_00019075";  
protein\_coding"; old "TCONS\_00019075";  
protein\_coding"; old "TCONS\_00019075";  
protein\_coding"; old "TCONS\_00019075";  
protein\_coding"; old "TCONS\_00019076";  
protein\_coding"; old "TCONS\_00019076";  
protein\_coding"; old "TCONS\_00019076";  
protein\_coding"; old "TCONS\_00019076";  
protein\_coding"; old "TCONS\_00000395";  
protein\_coding"; old "TCONS\_00000395";  
protein\_coding"; old "TCONS\_00000395";  
protein\_coding"; old "TCONS\_00000395";  
protein\_coding"; old "TCONS\_00000394";  
protein\_coding"; old "TCONS\_00000394";  
protein\_coding"; old "TCONS\_00000394";  
protein\_coding"; old "TCONS\_00030365";  
protein\_coding"; old "TCONS\_00030365";  
protein\_coding"; old "TCONS\_00030365";  
protein\_coding"; old "TCONS\_00000403";  
protein\_coding"; old "TCONS\_00019085";  
protein\_coding"; old "TCONS\_00019085";  
protein\_coding"; old "TCONS\_00000412";  
protein\_coding"; old "TCONS\_00000412";  
protein\_coding"; old "TCONS\_00000412";  
protein\_coding"; old "TCONS\_00000417";  
protein\_coding"; old "TCONS\_00000506";  
protein\_coding"; old "TCONS\_00000506";  
protein\_coding"; old "TCONS\_00000506";  
protein\_coding"; old "TCONS\_00000506";  
protein\_coding"; old "TCONS\_00006577";  
protein\_coding"; old "TCONS\_00006577";  
protein\_coding"; old "TCONS\_00006577";  
protein\_coding"; old "TCONS\_00000520";  
protein\_coding"; old "TCONS\_00000520";



protein\_coding"; old "TCONS\_00012444";  
protein\_coding"; old "TCONS\_00000942";  
protein\_coding"; old "TCONS\_00000942";  
protein\_coding"; old "TCONS\_00000942";  
protein\_coding"; old "TCONS\_00000941";  
protein\_coding"; old "TCONS\_00000941";  
protein\_coding"; old "TCONS\_00000941";  
protein\_coding"; old "TCONS\_00000943";  
protein\_coding"; old "TCONS\_00000943";  
protein\_coding"; old "TCONS\_00000976";  
protein\_coding"; old "TCONS\_00000976";  
protein\_coding"; old "TCONS\_00000977";  
protein\_coding"; old "TCONS\_00000977";  
protein\_coding"; old "TCONS\_00000977";  
protein\_coding"; old "TCONS\_00027037";  
protein\_coding"; old "TCONS\_00027037";  
protein\_coding"; old "TCONS\_00027037";  
protein\_coding"; old "TCONS\_00000999";  
protein\_coding"; old "TCONS\_00000999";  
protein\_coding"; old "TCONS\_00027118";  
protein\_coding"; old "TCONS\_00027118";  
protein\_coding"; old "TCONS\_00030923";  
protein\_coding"; old "TCONS\_00030923";  
protein\_coding"; old "TCONS\_00030923";  
protein\_coding"; old "TCONS\_00001234";  
protein\_coding"; old "TCONS\_00001234";  
protein\_coding"; old "TCONS\_00001234";  
protein\_coding"; old "TCONS\_00001234";  
protein\_coding"; old "TCONS\_00001234";

protein\_coding"; old "TCONS\_00012979";  
protein\_coding"; old "TCONS\_00001283";  
protein\_coding"; old "TCONS\_00001483";  
protein\_coding"; old "TCONS\_00001483";  
protein\_coding"; old "TCONS\_00007592";  
protein\_coding"; old "TCONS\_00007592";  
protein\_coding"; old "TCONS\_00019956";  
protein\_coding"; old "TCONS\_00019956";  
protein\_coding"; old "TCONS\_00001812";  
protein\_coding"; old "TCONS\_00001812";  
protein\_coding"; old "TCONS\_00007761";  
protein\_coding"; old "TCONS\_00007761";  
protein\_coding"; old "TCONS\_00001814";  
protein\_coding"; old "TCONS\_00001814";  
protein\_coding"; old "TCONS\_00013714";  
protein\_coding"; old "TCONS\_00027603";  
protein\_coding"; old "TCONS\_00027603";  
protein\_coding"; old "TCONS\_00007849";  
protein\_coding"; old "TCONS\_00007849";  
protein\_coding"; old "TCONS\_00020160";  
protein\_coding"; old "TCONS\_00020160";  
protein\_coding"; old "TCONS\_00020160";  
protein\_coding"; old "TCONS\_00024144";  
protein\_coding"; old "TCONS\_00002216";  
protein\_coding"; old "TCONS\_00020424";  
protein\_coding"; old "TCONS\_00020424";  
protein\_coding"; old "TCONS\_00020424";

protein\_coding"; old "TCONS\_00002578";  
protein\_coding"; old "TCONS\_00002620";  
protein\_coding"; old "TCONS\_00002620";  
protein\_coding"; old "TCONS\_00002620";  
protein\_coding"; old "TCONS\_00002620";  
protein\_coding"; old "TCONS\_00002621";  
protein\_coding"; old "TCONS\_00002621";  
protein\_coding"; old "TCONS\_00002621";  
protein\_coding"; old "TCONS\_00002621";  
protein\_coding"; old "TCONS\_00002656";  
protein\_coding"; old "TCONS\_00002657";  
protein\_coding"; old "TCONS\_00002657";  
protein\_coding"; old "TCONS\_00002756";  
protein\_coding"; old "TCONS\_00014978";  
protein\_coding"; old "TCONS\_00014978";  
protein\_coding"; old "TCONS\_00014978";  
protein\_coding"; old "TCONS\_00008696";  
protein\_coding"; old "TCONS\_00020770";  
protein\_coding"; old "TCONS\_00020770";  
protein\_coding"; old "TCONS\_00031885";  
protein\_coding"; old "TCONS\_00031885";  
protein\_coding"; old "TCONS\_00031885";  
protein\_coding"; old "TCONS\_00031885";  
protein\_coding"; old "TCONS\_00020773";  
protein\_coding"; old "TCONS\_00002889";  
protein\_coding"; old "TCONS\_00002889";  
protein\_coding"; old "TCONS\_00008746";

protein\_coding"; old "TCONS\_00008746";  
protein\_coding"; old "TCONS\_00008746";  
protein\_coding"; old "TCONS\_00008746";  
protein\_coding"; old "TCONS\_00008746";  
protein\_coding"; old "TCONS\_00024586";  
protein\_coding"; old "TCONS\_00015133";  
protein\_coding"; old "TCONS\_00015133";  
protein\_coding"; old "TCONS\_00002940";  
protein\_coding"; old "TCONS\_00002940";  
protein\_coding"; old "TCONS\_00002940";  
protein\_coding"; old "TCONS\_00008802";  
protein\_coding"; old "TCONS\_00008807";  
protein\_coding"; old "TCONS\_00002980";  
protein\_coding"; old "TCONS\_00002987";  
protein\_coding"; old "TCONS\_00002987";  
protein\_coding"; old "TCONS\_00020852";  
protein\_coding"; old "TCONS\_00020852";  
protein\_coding"; old "TCONS\_00008851";  
protein\_coding"; old "TCONS\_00003011";  
protein\_coding"; old "TCONS\_00003011";  
protein\_coding"; old "TCONS\_00024668";  
protein\_coding"; old "TCONS\_00024668";  
protein\_coding"; old "TCONS\_00024668";  
protein\_coding"; old "TCONS\_00003048";  
protein\_coding"; old "TCONS\_00008905";  
protein\_coding"; old "TCONS\_00008905";  
protein\_coding"; old "TCONS\_00003064";  
protein\_coding"; old "TCONS\_00008931";  
protein\_coding"; old "TCONS\_00015279";  
protein\_coding"; old "TCONS\_00015279";  
protein\_coding"; old "TCONS\_00028353";



protein\_coding"; old "TCONS\_00028353";  
protein\_coding"; old "TCONS\_00015282";  
protein\_coding"; old "TCONS\_00015282";  
protein\_coding"; old "TCONS\_00015282";  
protein\_coding"; old "TCONS\_00008950";  
protein\_coding"; old "TCONS\_00008950";  
protein\_coding"; old "TCONS\_00003114";  
protein\_coding"; old "TCONS\_00003114";  
protein\_coding"; old "TCONS\_00008951";  
protein\_coding"; old "TCONS\_00008951";  
protein\_coding"; old "TCONS\_00008951";  
protein\_coding"; old "TCONS\_00024705";  
protein\_coding"; old "TCONS\_00024705";  
protein\_coding"; old "TCONS\_00020940";  
protein\_coding"; old "TCONS\_00015301";  
protein\_coding"; old "TCONS\_00015301";  
protein\_coding"; old "TCONS\_00003157";  
protein\_coding"; old "TCONS\_00003157";  
protein\_coding"; old "TCONS\_00003159";  
protein\_coding"; old "TCONS\_00015335";  
protein\_coding"; old "TCONS\_00003226";  
protein\_coding"; old "TCONS\_00003226";  
protein\_coding"; old "TCONS\_00003232";  
protein\_coding"; old "TCONS\_00003232";  
protein\_coding"; old "TCONS\_00003241";  
protein\_coding"; old "TCONS\_00003241";  
protein\_coding"; old "TCONS\_00003241";  
protein\_coding"; old "TCONS\_00003241";  
protein\_coding"; old "TCONS\_00009031";  
protein\_coding"; old "TCONS\_00009031";  
protein\_coding"; old "TCONS\_00003249";  
protein\_coding"; old "TCONS\_00003249";  
protein\_coding"; old "TCONS\_00003256";  
protein\_coding"; old "TCONS\_00003256";  
protein\_coding"; old "TCONS\_00003256";





protein\_coding"; old "TCONS\_00003354";  
protein\_coding"; old "TCONS\_00015544";  
protein\_coding"; old "TCONS\_00003476";  
protein\_coding"; old "TCONS\_00009275";  
protein\_coding"; old "TCONS\_00009315";  
protein\_coding"; old "TCONS\_00009315";  
protein\_coding"; old "TCONS\_00009315";  
protein\_coding"; old "TCONS\_00009315";  
protein\_coding"; old "TCONS\_00021283";  
protein\_coding"; old "TCONS\_00009316";  
protein\_coding"; old "TCONS\_00015733";  
protein\_coding"; old "TCONS\_00015733";  
protein\_coding"; old "TCONS\_00015733";  
protein\_coding"; old "TCONS\_00003631";  
protein\_coding"; old "TCONS\_00003631";  
protein\_coding"; old "TCONS\_00003631";  
protein\_coding"; old "TCONS\_00003631";



protein\_coding"; old "TCONS\_00016636";  
protein\_coding"; old "TCONS\_00016636";  
protein\_coding"; old "TCONS\_00004300";  
protein\_coding"; old "TCONS\_00004300";  
protein\_coding"; old "TCONS\_00004299";  
protein\_coding"; old "TCONS\_00004299";  
protein\_coding"; old "TCONS\_00004298";  
protein\_coding"; old "TCONS\_00004298";  
protein\_coding"; old "TCONS\_00004298";  
protein\_coding"; old "TCONS\_00004298";  
protein\_coding"; old "TCONS\_00004301";  
protein\_coding"; old "TCONS\_00004301";  
protein\_coding"; old "TCONS\_00009950";  
protein\_coding"; old "TCONS\_00009950";  
protein\_coding"; old "TCONS\_00009950";  
protein\_coding"; old "TCONS\_00009986";  
protein\_coding"; old "TCONS\_00004344";  
protein\_coding"; old "TCONS\_00004343";  
protein\_coding"; old "TCONS\_00004453";  
protein\_coding"; old "TCONS\_00004453";



protein\_coding"; old "TCONS\_00017146";  
protein\_coding"; old "TCONS\_00004773";  
protein\_coding"; old "TCONS\_00004773";  
protein\_coding"; old "TCONS\_00004773";  
protein\_coding"; old "TCONS\_00029335";  
protein\_coding"; old "TCONS\_00029335";  
protein\_coding"; old "TCONS\_00029335";  
protein\_coding"; old "TCONS\_00029335";  
protein\_coding"; old "TCONS\_00004776";  
protein\_coding"; old "TCONS\_00004776";  
protein\_coding"; old "TCONS\_00004776";  
protein\_coding"; old "TCONS\_00032998";  
protein\_coding"; old "TCONS\_00032998";  
protein\_coding"; old "TCONS\_00017183";  
protein\_coding"; old "TCONS\_00029351";  
protein\_coding"; old "TCONS\_00029351";  
protein\_coding"; old "TCONS\_00029352";  
protein\_coding"; old "TCONS\_00004898";  
protein\_coding"; old "TCONS\_00010449";  
protein\_coding"; old "TCONS\_00010449";  
protein\_coding"; old "TCONS\_00025732";  
protein\_coding"; old "TCONS\_00025732";  
protein\_coding"; old "TCONS\_00025732";



protein\_coding"; old "TCONS\_00025732";  
protein\_coding"; old "TCONS\_00025732";  
protein\_coding"; old "TCONS\_00022102";  
protein\_coding"; old "TCONS\_00005000";  
protein\_coding"; old "TCONS\_00005000";  
protein\_coding"; old "TCONS\_00005000";  
protein\_coding"; old "TCONS\_00005000";  
protein\_coding"; old "TCONS\_00005114";  
protein\_coding"; old "TCONS\_00005114";  
protein\_coding"; old "TCONS\_00005116";  
protein\_coding"; old "TCONS\_00005119";  
protein\_coding"; old "TCONS\_00005119";  
protein\_coding"; old "TCONS\_00005119";  
protein\_coding"; old "TCONS\_00029537";  
protein\_coding"; old "TCONS\_00029537";  
protein\_coding"; old "TCONS\_00029537";  
protein\_coding"; old "TCONS\_00029537";  
protein\_coding"; old "TCONS\_00017498";  
protein\_coding"; old "TCONS\_00017498";  
protein\_coding"; old "TCONS\_00017498";  
protein\_coding"; old "TCONS\_00017498";  
protein\_coding"; old "TCONS\_00017498";







protein\_coding"; old "TCONS\_00018594";  
protein\_coding"; old "TCONS\_00005953";  
protein\_coding"; old "TCONS\_00005953";  
protein\_coding"; old "TCONS\_00006018";  
protein\_coding"; old "TCONS\_00006018";  
protein\_coding"; old "TCONS\_00006018";  
protein\_coding"; old "TCONS\_00006019";  
protein\_coding"; old "TCONS\_00006019";  
protein\_coding"; old "TCONS\_00049062";  
protein\_coding"; old "TCONS\_00049062";  
protein\_coding"; old "TCONS\_00049062";  
protein\_coding"; old "TCONS\_00057950";  
protein\_coding"; old "TCONS\_00057950";  
protein\_coding"; old "TCONS\_00057950";  
protein\_coding"; old "TCONS\_00040238";  
protein\_coding"; old "TCONS\_00040238";  
protein\_coding"; old "TCONS\_00040238";  
protein\_coding"; old "TCONS\_00040238";  
protein\_coding"; old "TCONS\_00040239";  
protein\_coding"; old "TCONS\_00040239";  
protein\_coding"; old "TCONS\_00040298";  
protein\_coding"; old "TCONS\_00040298";  
protein\_coding"; old "TCONS\_00054990";  
protein\_coding"; old "TCONS\_00040502";  
protein\_coding"; old "TCONS\_00040502";  
protein\_coding"; old "TCONS\_00040502";  
protein\_coding"; old "TCONS\_00049566";  
protein\_coding"; old "TCONS\_00040553";  
protein\_coding"; old "TCONS\_00045200";  
protein\_coding"; old "TCONS\_00045200";





"protein\_coding"; old "TCONS\_00040815";  
protein\_coding"; old "TCONS\_00040816";  
"protein\_coding"; old "TCONS\_00040816";  
protein\_coding"; old "TCONS\_00045638";  
protein\_coding"; old "TCONS\_00050100";  
protein\_coding"; old "TCONS\_00041007";  
protein\_coding"; old "TCONS\_00041007";  
protein\_coding"; old "TCONS\_00041007";  
protein\_coding"; old "TCONS\_00055423";  
protein\_coding"; old "TCONS\_00045648";  
protein\_coding"; old "TCONS\_00045648";  
protein\_coding"; old "TCONS\_00045648";  
protein\_coding"; old "TCONS\_00061121";  
protein\_coding"; old "TCONS\_00061121";



protein\_coding"; old "TCONS\_00061121";  
protein\_coding"; old "TCONS\_00061121";  
protein\_coding"; old "TCONS\_00058429";  
protein\_coding"; old "TCONS\_00058429";  
protein\_coding"; old "TCONS\_00058429";  
protein\_coding"; old "TCONS\_00045723";  
protein\_coding"; old "TCONS\_00045723";  
protein\_coding"; old "TCONS\_00045723";  
protein\_coding"; old "TCONS\_00050221";  
protein\_coding"; old "TCONS\_00050221";  
protein\_coding"; old "TCONS\_00045744";  
protein\_coding"; old "TCONS\_00050480";  
protein\_coding"; old "TCONS\_00050480";  
protein\_coding"; old "TCONS\_00041311";  
protein\_coding"; old "TCONS\_00041311";  
protein\_coding"; old "TCONS\_00046044";  
protein\_coding"; old "TCONS\_00046044";  
protein\_coding"; old "TCONS\_00041611";  
protein\_coding"; old "TCONS\_00041611";  
protein\_coding"; old "TCONS\_00041679";  
protein\_coding"; old "TCONS\_00041679";  
protein\_coding"; old "TCONS\_00041679";  
protein\_coding"; old "TCONS\_00041681";  
protein\_coding"; old "TCONS\_00041681";  
protein\_coding"; old "TCONS\_00041681";  
protein\_coding"; old "TCONS\_00046258";  
protein\_coding"; old "TCONS\_00046258";  
protein\_coding"; old "TCONS\_00061553";  
protein\_coding"; old "TCONS\_00061553";  
protein\_coding"; old "TCONS\_00061553";  
protein\_coding"; old "TCONS\_00046268";  
protein\_coding"; old "TCONS\_00046268";  
protein\_coding"; old "TCONS\_00046268";  
protein\_coding"; old "TCONS\_00046268";  
protein\_coding"; old "TCONS\_00046270";

protein\_coding"; old "TCONS\_00046270";  
protein\_coding"; old "TCONS\_00046270";  
protein\_coding"; old "TCONS\_00050925";  
protein\_coding"; old "TCONS\_00050925";  
protein\_coding"; old "TCONS\_00041718";  
protein\_coding"; old "TCONS\_00041718";  
protein\_coding"; old "TCONS\_00041780";  
protein\_coding"; old "TCONS\_00041855";  
protein\_coding"; old "TCONS\_00041855";  
protein\_coding"; old "TCONS\_00041855";  
protein\_coding"; old "TCONS\_00041855";  
protein\_coding"; old "TCONS\_00046390";  
protein\_coding"; old "TCONS\_00046390";  
protein\_coding"; old "TCONS\_00046390";  
protein\_coding"; old "TCONS\_00046390";  
protein\_coding"; old "TCONS\_00041884";  
protein\_coding"; old "TCONS\_00041884";  
protein\_coding"; old "TCONS\_00041884";  
protein\_coding"; old "TCONS\_00064450";  
protein\_coding"; old "TCONS\_00064450";  
protein\_coding"; old "TCONS\_00064450";  
protein\_coding"; old "TCONS\_00064450";  
protein\_coding"; old "TCONS\_00046523";  
protein\_coding"; old "TCONS\_00061745";  
protein\_coding"; old "TCONS\_00061745";





protein\_coding"; old "TCONS\_00051349";  
protein\_coding"; old "TCONS\_00051349";  
protein\_coding"; old "TCONS\_00051349";  
protein\_coding"; old "TCONS\_00051349";  
protein\_coding"; old "TCONS\_00046612";  
protein\_coding"; old "TCONS\_00046612";  
protein\_coding"; old "TCONS\_00046612";  
protein\_coding"; old "TCONS\_00046612";  
protein\_coding"; old "TCONS\_00042314";  
protein\_coding"; old "TCONS\_00042314";  
protein\_coding"; old "TCONS\_00042313";  
protein\_coding"; old "TCONS\_00042313";  
protein\_coding"; old "TCONS\_00046787";  
protein\_coding"; old "TCONS\_00046787";  
protein\_coding"; old "TCONS\_00046789";  
protein\_coding"; old "TCONS\_00046789";  
protein\_coding"; old "TCONS\_00046789";  
protein\_coding"; old "TCONS\_00046789";  
protein\_coding"; old "TCONS\_00042324";  
protein\_coding"; old "TCONS\_00042324";  
protein\_coding"; old "TCONS\_00042378";  
protein\_coding"; old "TCONS\_00042378";  
protein\_coding"; old "TCONS\_00042384";  
protein\_coding"; old "TCONS\_00042384";  
protein\_coding"; old "TCONS\_00042384";  
protein\_coding"; old "TCONS\_00051727";  
protein\_coding"; old "TCONS\_00051727";  
protein\_coding"; old "TCONS\_00051727";  
protein\_coding"; old "TCONS\_00046880";  
protein\_coding"; old "TCONS\_00046880";  
protein\_coding"; old "TCONS\_00042514";  
protein\_coding"; old "TCONS\_00042548";  
protein\_coding"; old "TCONS\_00042548";  
protein\_coding"; old "TCONS\_00047028";  
protein\_coding"; old "TCONS\_00047028";

protein\_coding"; old "TCONS\_00047028";  
protein\_coding"; old "TCONS\_00047120";  
protein\_coding"; old "TCONS\_00056480";  
protein\_coding"; old "TCONS\_00042732";  
protein\_coding"; old "TCONS\_00042732";  
protein\_coding"; old "TCONS\_00042896";  
protein\_coding"; old "TCONS\_00042896";  
protein\_coding"; old "TCONS\_00042903";  
protein\_coding"; old "TCONS\_00042903";  
protein\_coding"; old "TCONS\_00042903";  
protein\_coding"; old "TCONS\_00059536";  
protein\_coding"; old "TCONS\_00047384";  
protein\_coding"; old "TCONS\_00047384";  
protein\_coding"; old "TCONS\_00047384";  
protein\_coding"; old "TCONS\_00042948";  
protein\_coding"; old "TCONS\_00042948";  
protein\_coding"; old "TCONS\_00042948";

protein\_coding"; old "TCONS\_00047387";  
protein\_coding"; old "TCONS\_00047387";  
protein\_coding"; old "TCONS\_00062294";  
protein\_coding"; old "TCONS\_00047476";  
protein\_coding"; old "TCONS\_00056813";  
protein\_coding"; old "TCONS\_00056813";  
protein\_coding"; old "TCONS\_00043172";  
protein\_coding"; old "TCONS\_00056818";  
"protein\_coding"; old "TCONS\_00056818";  
protein\_coding"; old "TCONS\_00047717";  
protein\_coding"; old "TCONS\_00047717";  
protein\_coding"; old "TCONS\_00062601";  
protein\_coding"; old "TCONS\_00062601";  
protein\_coding"; old "TCONS\_00062601";  
protein\_coding"; old "TCONS\_00043582";

protein\_coding"; old "TCONS\_00043582";  
protein\_coding"; old "TCONS\_00043582";  
protein\_coding"; old "TCONS\_00057084";  
protein\_coding"; old "TCONS\_00053884";  
protein\_coding"; old "TCONS\_00053884";  
protein\_coding"; old "TCONS\_00053884";  
protein\_coding"; old "TCONS\_00043980";  
protein\_coding"; old "TCONS\_00043980";  
protein\_coding"; old "TCONS\_00043980";  
protein\_coding"; old "TCONS\_00060201";  
protein\_coding"; old "TCONS\_00060201";  
protein\_coding"; old "TCONS\_00057473";  
protein\_coding"; old "TCONS\_00044177";  
protein\_coding"; old "TCONS\_00044177";  
protein\_coding"; old "TCONS\_00044177";  
protein\_coding"; old "TCONS\_00044177";  
protein\_coding"; old "TCONS\_00065732";  
protein\_coding"; old "TCONS\_00065732";  
protein\_coding"; old "TCONS\_00065732";  
protein\_coding"; old "TCONS\_00057480";  
protein\_coding"; old "TCONS\_00057480";  
protein\_coding"; old "TCONS\_00054057";  
protein\_coding"; old "TCONS\_00054057";  
protein\_coding"; old "TCONS\_00044229";  
protein\_coding"; old "TCONS\_00044456";



protein\_coding"; old "TCONS\_00044456";  
protein\_coding"; old "TCONS\_00044456";  
protein\_coding"; old "TCONS\_00048681";  
protein\_coding"; old "TCONS\_00048681";  
protein\_coding"; old "TCONS\_00048681";  
protein\_coding"; old "TCONS\_00057687";  
protein\_coding"; old "TCONS\_00057687";  
protein\_coding"; old "TCONS\_00057687";  
protein\_coding"; old "TCONS\_00054720";  
protein\_coding"; old "TCONS\_00081729";  
protein\_coding"; old "TCONS\_00081729";  
protein\_coding"; old "TCONS\_00081742";  
protein\_coding"; old "TCONS\_00081742";  
protein\_coding"; old "TCONS\_00071091";  
protein\_coding"; old "TCONS\_00102407";  
protein\_coding"; old "TCONS\_00102407";  
protein\_coding"; old "TCONS\_00081828";  
protein\_coding"; old "TCONS\_00081828";  
protein\_coding"; old "TCONS\_00071116";  
protein\_coding"; old "TCONS\_00071116";  
protein\_coding"; old "TCONS\_00071146";  
protein\_coding"; old "TCONS\_00071146";  
protein\_coding"; old "TCONS\_00071257";  
protein\_coding"; old "TCONS\_00071257";  
protein\_coding"; old "TCONS\_00071257";  
protein\_coding"; old "TCONS\_00071364";  
protein\_coding"; old "TCONS\_00071364";  
protein\_coding"; old "TCONS\_00071364";  
protein\_coding"; old "TCONS\_00077198";  
protein\_coding"; old "TCONS\_00077198";  
protein\_coding"; old "TCONS\_00071495";

protein\_coding"; old "TCONS\_00071495";  
protein\_coding"; old "TCONS\_00077200";  
protein\_coding"; old "TCONS\_00077200";  
protein\_coding"; old "TCONS\_00071554";  
protein\_coding"; old "TCONS\_00071554";  
protein\_coding"; old "TCONS\_00082308";  
protein\_coding"; old "TCONS\_00071638";  
protein\_coding"; old "TCONS\_00071638";  
protein\_coding"; old "TCONS\_00071639";  
protein\_coding"; old "TCONS\_00071639";  
protein\_coding"; old "TCONS\_00092534";  
protein\_coding"; old "TCONS\_00102743";  
protein\_coding"; old "TCONS\_00088913";  
protein\_coding"; old "TCONS\_00088913";  
protein\_coding"; old "TCONS\_00088913";  
protein\_coding"; old "TCONS\_00088913";



protein\_coding"; old "TCONS\_00077464";  
protein\_coding"; old "TCONS\_00071826";  
protein\_coding"; old "TCONS\_00082625";  
protein\_coding"; old "TCONS\_00082625";  
protein\_coding"; old "TCONS\_00088931";  
protein\_coding"; old "TCONS\_00088931";  
protein\_coding"; old "TCONS\_00071834";  
protein\_coding"; old "TCONS\_00071834";  
protein\_coding"; old "TCONS\_00071834";  
protein\_coding"; old "TCONS\_00071834";  
protein\_coding"; old "TCONS\_00071839";  
protein\_coding"; old "TCONS\_00092556";  
protein\_coding"; old "TCONS\_00092556";  
protein\_coding"; old "TCONS\_00092556";  
protein\_coding"; old "TCONS\_00088941";  
protein\_coding"; old "TCONS\_00071850";  
protein\_coding"; old "TCONS\_00071850";  
protein\_coding"; old "TCONS\_00071850";  
protein\_coding"; old "TCONS\_00071850";  
protein\_coding"; old "TCONS\_00071863";  
protein\_coding"; old "TCONS\_00071863";



protein\_coding"; old "TCONS\_00082810";  
"protein\_coding"; old "TCONS\_00082810";  
"protein\_coding"; old "TCONS\_00082810";  
protein\_coding"; old "TCONS\_00077604";  
protein\_coding"; old "TCONS\_00072035";  
protein\_coding"; old "TCONS\_00072035";  
protein\_coding"; old "TCONS\_00077681";  
protein\_coding"; old "TCONS\_00077681";  
protein\_coding"; old "TCONS\_00077681";  
protein\_coding"; old "TCONS\_00072086";  
protein\_coding"; old "TCONS\_00072086";  
protein\_coding"; old "TCONS\_00072303";  
protein\_coding"; old "TCONS\_00072304";  
protein\_coding"; old "TCONS\_00072304";  
protein\_coding"; old "TCONS\_00072352";  
"protein\_coding"; old "TCONS\_00072352";  
protein\_coding"; old "TCONS\_00072422";  
protein\_coding"; old "TCONS\_00072590";  
protein\_coding"; old "TCONS\_00072590";  
protein\_coding"; old "TCONS\_00072590";  
protein\_coding"; old "TCONS\_00072589";  
protein\_coding"; old "TCONS\_00072589";

protein\_coding"; old "TCONS\_00072669";  
protein\_coding"; old "TCONS\_00072669";  
protein\_coding"; old "TCONS\_00072711";  
protein\_coding"; old "TCONS\_00072711";  
protein\_coding"; old "TCONS\_00072867";  
protein\_coding"; old "TCONS\_00073188";  
protein\_coding"; old "TCONS\_00073188";  
protein\_coding"; old "TCONS\_00073188";  
protein\_coding"; old "TCONS\_00073342";  
protein\_coding"; old "TCONS\_00073342";  
protein\_coding"; old "TCONS\_00073342";  
protein\_coding"; old "TCONS\_00073342";  
protein\_coding"; old "TCONS\_00078760";  
protein\_coding"; old "TCONS\_00078760";  
protein\_coding"; old "TCONS\_00073464";  
protein\_coding"; old "TCONS\_00073464";  
protein\_coding"; old "TCONS\_00073539";  
protein\_coding"; old "TCONS\_00073539";  
protein\_coding"; old "TCONS\_00073538";  
protein\_coding"; old "TCONS\_00073538";  
protein\_coding"; old "TCONS\_00073538";  
protein\_coding"; old "TCONS\_00073551";  
protein\_coding"; old "TCONS\_00073551";  
protein\_coding"; old "TCONS\_00073551";  
protein\_coding"; old "TCONS\_00078945";  
protein\_coding"; old "TCONS\_00078945";  
protein\_coding"; old "TCONS\_00073576";  
protein\_coding"; old "TCONS\_00073576";  
protein\_coding"; old "TCONS\_00073575";  
protein\_coding"; old "TCONS\_00078997";  
protein\_coding"; old "TCONS\_00078997";

protein\_coding"; old "TCONS\_00078997";  
protein\_coding"; old "TCONS\_00078997";  
protein\_coding"; old "TCONS\_00078997";  
protein\_coding"; old "TCONS\_00078997";  
protein\_coding"; old "TCONS\_00078997";  
protein\_coding"; old "TCONS\_00078997";  
protein\_coding"; old "TCONS\_00078997";  
"protein\_coding"; old "TCONS\_00078997";  
protein\_coding"; old "TCONS\_00090072";  
protein\_coding"; old "TCONS\_00073697";  
protein\_coding"; old "TCONS\_00073697";  
protein\_coding"; old "TCONS\_00079132";  
protein\_coding"; old "TCONS\_00079132";  
protein\_coding"; old "TCONS\_00100630";  
protein\_coding"; old "TCONS\_00100630";  
protein\_coding"; old "TCONS\_00079162";  
protein\_coding"; old "TCONS\_00079162";  
protein\_coding"; old "TCONS\_00079162";  
protein\_coding"; old "TCONS\_00079162";  
protein\_coding"; old "TCONS\_00085004";  
protein\_coding"; old "TCONS\_00085004";  
protein\_coding"; old "TCONS\_00085004";  
protein\_coding"; old "TCONS\_00073943";  
protein\_coding"; old "TCONS\_00079348";



protein\_coding"; old "TCONS\_00079348";  
protein\_coding"; old "TCONS\_00079348";  
protein\_coding"; old "TCONS\_00074179";  
protein\_coding"; old "TCONS\_00074221";  
protein\_coding"; old "TCONS\_00074221";  
protein\_coding"; old "TCONS\_00074220";  
protein\_coding"; old "TCONS\_00074220";  
protein\_coding"; old "TCONS\_00074280";  
protein\_coding"; old "TCONS\_00074280";  
protein\_coding"; old "TCONS\_00074283";  
protein\_coding"; old "TCONS\_00074283";  
protein\_coding"; old "TCONS\_00074283";  
protein\_coding"; old "TCONS\_00079554";  
protein\_coding"; old "TCONS\_00079554";  
protein\_coding"; old "TCONS\_00079554";  
protein\_coding"; old "TCONS\_00074290";  
protein\_coding"; old "TCONS\_00074290";  
protein\_coding"; old "TCONS\_00079612";  
protein\_coding"; old "TCONS\_00090575";  
protein\_coding"; old "TCONS\_00100962";  
protein\_coding"; old "TCONS\_00100962";  
protein\_coding"; old "TCONS\_00100962";  
protein\_coding"; old "TCONS\_00100962";

protein\_coding"; old "TCONS\_00100962";  
protein\_coding"; old "TCONS\_00100962";  
protein\_coding"; old "TCONS\_00074347";  
protein\_coding"; old "TCONS\_00074347";  
protein\_coding"; old "TCONS\_00074347";  
protein\_coding"; old "TCONS\_00074353";  
protein\_coding"; old "TCONS\_00074353";  
protein\_coding"; old "TCONS\_00074412";  
protein\_coding"; old "TCONS\_00074412";  
protein\_coding"; old "TCONS\_00074413";  
protein\_coding"; old "TCONS\_00074413";  
protein\_coding"; old "TCONS\_00074413";  
protein\_coding"; old "TCONS\_00074475";  
protein\_coding"; old "TCONS\_00079739";  
protein\_coding"; old "TCONS\_00079739";  
protein\_coding"; old "TCONS\_00079739";  
protein\_coding"; old "TCONS\_00074644";  
protein\_coding"; old "TCONS\_00074644";  
protein\_coding"; old "TCONS\_00074680";  
protein\_coding"; old "TCONS\_00074681";  
protein\_coding"; old "TCONS\_00074679";  
protein\_coding"; old "TCONS\_00074679";  
protein\_coding"; old "TCONS\_00074679";  
protein\_coding"; old "TCONS\_00074679";  
protein\_coding"; old "TCONS\_00074679";

protein\_coding"; old "TCONS\_00074679";  
protein\_coding"; old "TCONS\_00090794";  
protein\_coding"; old "TCONS\_00090794";  
protein\_coding"; old "TCONS\_00085879";  
protein\_coding"; old "TCONS\_00074687";  
protein\_coding"; old "TCONS\_00074687";  
protein\_coding"; old "TCONS\_00074699";  
protein\_coding"; old "TCONS\_00090812";  
protein\_coding"; old "TCONS\_00080037";  
protein\_coding"; old "TCONS\_00080037";  
protein\_coding"; old "TCONS\_00080202";  
protein\_coding"; old "TCONS\_00080202";  
protein\_coding"; old "TCONS\_00080202";  
protein\_coding"; old "TCONS\_00075151";  
protein\_coding"; old "TCONS\_00080272";  
protein\_coding"; old "TCONS\_00080272";  
protein\_coding"; old "TCONS\_00080272";  
protein\_coding"; old "TCONS\_00080272";  
protein\_coding"; old "TCONS\_00094596";  
protein\_coding"; old "TCONS\_00094596";  
protein\_coding"; old "TCONS\_00086761";  
protein\_coding"; old "TCONS\_00086761";  
protein\_coding"; old "TCONS\_00075305";  
protein\_coding"; old "TCONS\_00075305";  
protein\_coding"; old "TCONS\_00075305";  
protein\_coding"; old "TCONS\_00075358";

protein\_coding"; old "TCONS\_00075358";  
protein\_coding"; old "TCONS\_00080568";  
protein\_coding"; old "TCONS\_00080568";  
protein\_coding"; old "TCONS\_00075529";  
protein\_coding"; old "TCONS\_00075529";  
protein\_coding"; old "TCONS\_00075593";  
protein\_coding"; old "TCONS\_00091411";  
protein\_coding"; old "TCONS\_00075686";  
protein\_coding"; old "TCONS\_00080729";  
protein\_coding"; old "TCONS\_00087272";  
protein\_coding"; old "TCONS\_00098440";  
protein\_coding"; old "TCONS\_00098440";  
protein\_coding"; old "TCONS\_00081025";  
protein\_coding"; old "TCONS\_00081025";

protein\_coding"; old "TCONS\_00081025";  
protein\_coding"; old "TCONS\_00076052";  
protein\_coding"; old "TCONS\_00076052";  
protein\_coding"; old "TCONS\_00076051";  
protein\_coding"; old "TCONS\_00076051";  
protein\_coding"; old "TCONS\_00076079";  
protein\_coding"; old "TCONS\_00076109";  
protein\_coding"; old "TCONS\_00076109";  
protein\_coding"; old "TCONS\_00076148";  
protein\_coding"; old "TCONS\_00091779";  
protein\_coding"; old "TCONS\_00076326";  
protein\_coding"; old "TCONS\_00076355";  
protein\_coding"; old "TCONS\_00076355";  
protein\_coding"; old "TCONS\_00076355";  
protein\_coding"; old "TCONS\_00076355";  
protein\_coding"; old "TCONS\_00076385";  
protein\_coding"; old "TCONS\_00076385";  
protein\_coding"; old "TCONS\_00081366";  
protein\_coding"; old "TCONS\_00081366";  
protein\_coding"; old "TCONS\_00076412";  
protein\_coding"; old "TCONS\_00076412";  
protein\_coding"; old "TCONS\_00076412";  
protein\_coding"; old "TCONS\_00076412";  
protein\_coding"; old "TCONS\_00076413";  
protein\_coding"; old "TCONS\_00098767";  
protein\_coding"; old "TCONS\_00098767";  
protein\_coding"; old "TCONS\_00098767";

protein\_coding"; old "TCONS\_00076418";  
protein\_coding"; old "TCONS\_00076418";  
protein\_coding"; old "TCONS\_00091872";  
protein\_coding"; old "TCONS\_00091872";  
protein\_coding"; old "TCONS\_00076504";  
protein\_coding"; old "TCONS\_00088119";  
protein\_coding"; old "TCONS\_00088119";  
protein\_coding"; old "TCONS\_00088119";  
protein\_coding"; old "TCONS\_00088119";  
protein\_coding"; old "TCONS\_00076533";  
protein\_coding"; old "TCONS\_00076533";  
protein\_coding"; old "TCONS\_00076533";  
protein\_coding"; old "TCONS\_00076547";  
protein\_coding"; old "TCONS\_00076547";  
protein\_coding"; old "TCONS\_00076547";  
protein\_coding"; old "TCONS\_00088139";  
protein\_coding"; old "TCONS\_00076548";  
protein\_coding"; old "TCONS\_00076548";  
protein\_coding"; old "TCONS\_00076548";  
protein\_coding"; old "TCONS\_00076548";  
protein\_coding"; old "TCONS\_00076571";  
protein\_coding"; old "TCONS\_00076571";  
protein\_coding"; old "TCONS\_00076571";  
protein\_coding"; old "TCONS\_00076604";  
protein\_coding"; old "TCONS\_00076604";  
protein\_coding"; old "TCONS\_00081517";  
protein\_coding"; old "TCONS\_00081517";  
protein\_coding"; old "TCONS\_00081517";  
protein\_coding"; old "TCONS\_00081517";  
protein\_coding"; old "TCONS\_00081516";  
protein\_coding"; old "TCONS\_00081516";

protein\_coding"; old "TCONS\_00081516";  
protein\_coding"; old "TCONS\_00081520";  
protein\_coding"; old "TCONS\_00076611";  
protein\_coding"; old "TCONS\_00112307";  
protein\_coding"; old "TCONS\_00112307";  
protein\_coding"; old "TCONS\_00112307";  
protein\_coding"; old "TCONS\_00108266";  
protein\_coding"; old "TCONS\_00108266";  
protein\_coding"; old "TCONS\_00108268";  
protein\_coding"; old "TCONS\_00108268";  
protein\_coding"; old "TCONS\_00108298";  
protein\_coding"; old "TCONS\_00108298";  
protein\_coding"; old "TCONS\_00108298";  
protein\_coding"; old "TCONS\_00112370";  
protein\_coding"; old "TCONS\_00108371";  
protein\_coding"; old "TCONS\_00108371";  
protein\_coding"; old "TCONS\_00108371";  
protein\_coding"; old "TCONS\_00108708";  
protein\_coding"; old "TCONS\_00121630";  
protein\_coding"; old "TCONS\_00121630";  
protein\_coding"; old "TCONS\_00121630";  
protein\_coding"; old "TCONS\_00121630";

protein\_coding"; old "TCONS\_00121630";  
protein\_coding"; old "TCONS\_00121630";  
protein\_coding"; old "TCONS\_00108712";  
protein\_coding"; old "TCONS\_00108712";  
protein\_coding"; old "TCONS\_00108712";  
protein\_coding"; old "TCONS\_00131536";  
protein\_coding"; old "TCONS\_00121650";  
protein\_coding"; old "TCONS\_00108883";  
protein\_coding"; old "TCONS\_00108883";  
protein\_coding"; old "TCONS\_00112941";  
protein\_coding"; old "TCONS\_00112941";  
protein\_coding"; old "TCONS\_00108956";  
protein\_coding"; old "TCONS\_00112942";  
protein\_coding"; old "TCONS\_00112942";  
protein\_coding"; old "TCONS\_00112942";  
protein\_coding"; old "TCONS\_00108982";  
protein\_coding"; old "TCONS\_00108982";  
protein\_coding"; old "TCONS\_00121860";  
protein\_coding"; old "TCONS\_00121860";  
protein\_coding"; old "TCONS\_00121860";  
protein\_coding"; old "TCONS\_00109197";  
protein\_coding"; old "TCONS\_00109197";  
protein\_coding"; old "TCONS\_00109197";  
protein\_coding"; old "TCONS\_00109202";  
protein\_coding"; old "TCONS\_00109202";



protein\_coding"; old "TCONS\_00109202";  
protein\_coding"; old "TCONS\_00109202";  
protein\_coding"; old "TCONS\_00109202";  
protein\_coding"; old "TCONS\_00109202";  
protein\_coding"; old "TCONS\_00109202";  
protein\_coding"; old "TCONS\_00109202";  
protein\_coding"; old "TCONS\_00129526";  
protein\_coding"; old "TCONS\_00129526";  
protein\_coding"; old "TCONS\_00129526";  
protein\_coding"; old "TCONS\_00129526";  
protein\_coding"; old "TCONS\_00129525";  
protein\_coding"; old "TCONS\_00129525";  
protein\_coding"; old "TCONS\_00129525";  
protein\_coding"; old "TCONS\_00109445";  
protein\_coding"; old "TCONS\_00109509";  
protein\_coding"; old "TCONS\_00109509";  
protein\_coding"; old "TCONS\_00109509";  
protein\_coding"; old "TCONS\_00109509";  
protein\_coding"; old "TCONS\_00109508";  
protein\_coding"; old "TCONS\_00109508";  
protein\_coding"; old "TCONS\_00109508";  
protein\_coding"; old "TCONS\_00109508";  
protein\_coding"; old "TCONS\_00109730";  
protein\_coding"; old "TCONS\_00109730";  
protein\_coding"; old "TCONS\_00109765";  
protein\_coding"; old "TCONS\_00109765";  
protein\_coding"; old "TCONS\_00109765";  
protein\_coding"; old "TCONS\_00113622";  
protein\_coding"; old "TCONS\_00113622";  
protein\_coding"; old "TCONS\_00113622";

protein\_coding"; old "TCONS\_00129743";  
protein\_coding"; old "TCONS\_00129743";  
protein\_coding"; old "TCONS\_00113635";  
protein\_coding"; old "TCONS\_00113635";  
protein\_coding"; old "TCONS\_00113635";  
protein\_coding"; old "TCONS\_00113735";  
protein\_coding"; old "TCONS\_00113735";  
protein\_coding"; old "TCONS\_00118194";  
protein\_coding"; old "TCONS\_00118194";  
protein\_coding"; old "TCONS\_00118194";  
protein\_coding"; old "TCONS\_00118194";  
protein\_coding"; old "TCONS\_00110071";  
protein\_coding"; old "TCONS\_00125062";  
protein\_coding"; old "TCONS\_00125062";  
protein\_coding"; old "TCONS\_00125062";  
protein\_coding"; old "TCONS\_00125062";  
protein\_coding"; old "TCONS\_00110075";  
"protein\_coding"; old "TCONS\_00110075";  
"protein\_coding"; old "TCONS\_00110075";  
"protein\_coding"; old "TCONS\_00110075";

"protein\_coding"; old "TCONS\_00110075";  
"protein\_coding"; old "TCONS\_00110075";  
protein\_coding"; old "TCONS\_00110077";  
"protein\_coding"; old "TCONS\_00110077";  
"protein\_coding"; old "TCONS\_00110077";  
"protein\_coding"; old "TCONS\_00110077";  
"protein\_coding"; old "TCONS\_00110077";  
protein\_coding"; old "TCONS\_00122504";  
"protein\_coding"; old "TCONS\_00122504";  
"protein\_coding"; old "TCONS\_00122504";  
protein\_coding"; old "TCONS\_00113915";  
protein\_coding"; old "TCONS\_00110194";  
protein\_coding"; old "TCONS\_00110194";  
protein\_coding"; old "TCONS\_00110244";  
protein\_coding"; old "TCONS\_00110244";

protein\_coding"; old "TCONS\_00110243";  
protein\_coding"; old "TCONS\_00110243";  
protein\_coding"; old "TCONS\_00110272";  
protein\_coding"; old "TCONS\_00110302";  
protein\_coding"; old "TCONS\_00110302";  
protein\_coding"; old "TCONS\_00110302";  
protein\_coding"; old "TCONS\_00114194";  
protein\_coding"; old "TCONS\_00114194";  
protein\_coding"; old "TCONS\_00110545";  
protein\_coding"; old "TCONS\_00110547";  
protein\_coding"; old "TCONS\_00110547";  
protein\_coding"; old "TCONS\_00110547";  
protein\_coding"; old "TCONS\_00110572";  
protein\_coding"; old "TCONS\_00114458";  
protein\_coding"; old "TCONS\_00114458";  
protein\_coding"; old "TCONS\_00114458";  
protein\_coding"; old "TCONS\_00110722";  
protein\_coding"; old "TCONS\_00110722";  
protein\_coding"; old "TCONS\_00110863";  
protein\_coding"; old "TCONS\_00110863";  
protein\_coding"; old "TCONS\_00110863";  
protein\_coding"; old "TCONS\_00110873";  
protein\_coding"; old "TCONS\_00110873";  
protein\_coding"; old "TCONS\_00127986";  
protein\_coding"; old "TCONS\_00127986";  
protein\_coding"; old "TCONS\_00119774";  
protein\_coding"; old "TCONS\_00119774";  
protein\_coding"; old "TCONS\_00119800";  
protein\_coding"; old "TCONS\_00119800";

protein\_coding"; old "TCONS\_00111146";  
protein\_coding"; old "TCONS\_00111146";  
protein\_coding"; old "TCONS\_00128073";  
protein\_coding"; old "TCONS\_00128073";  
protein\_coding"; old "TCONS\_00128073";  
protein\_coding"; old "TCONS\_00114854";  
protein\_coding"; old "TCONS\_00114854";  
protein\_coding"; old "TCONS\_00114854";  
protein\_coding"; old "TCONS\_00111432";  
protein\_coding"; old "TCONS\_00130696";  
protein\_coding"; old "TCONS\_00130696";  
protein\_coding"; old "TCONS\_00130696";  
protein\_coding"; old "TCONS\_00120148";  
protein\_coding"; old "TCONS\_00111504";  
protein\_coding"; old "TCONS\_00115274";  
protein\_coding"; old "TCONS\_00115274";  
protein\_coding"; old "TCONS\_00111858";  
protein\_coding"; old "TCONS\_00111858";  
protein\_coding"; old "TCONS\_00111862";  
protein\_coding"; old "TCONS\_00111862";

protein\_coding"; old "TCONS\_00111883";  
protein\_coding"; old "TCONS\_00111883";  
protein\_coding"; old "TCONS\_00126150";  
protein\_coding"; old "TCONS\_00120990";  
protein\_coding"; old "TCONS\_00120990";  
protein\_coding"; old "TCONS\_00115643";  
protein\_coding"; old "TCONS\_00115643";  
protein\_coding"; old "TCONS\_00115643";  
protein\_coding"; old "TCONS\_00115643";  
protein\_coding"; old "TCONS\_00128612";  
protein\_coding"; old "TCONS\_00128612";  
protein\_coding"; old "TCONS\_00128612";  
protein\_coding"; old "TCONS\_00121082";  
protein\_coding"; old "TCONS\_00121082";  
protein\_coding"; old "TCONS\_00121083";  
protein\_coding"; old "TCONS\_00121083";  
protein\_coding"; old "TCONS\_00121083";  
protein\_coding"; old "TCONS\_00121083";  
protein\_coding"; old "TCONS\_00112068";  
protein\_coding"; old "TCONS\_00112068";  
protein\_coding"; old "TCONS\_00112068";  
protein\_coding"; old "TCONS\_00112068";  
protein\_coding"; old "TCONS\_00123832";  
protein\_coding"; old "TCONS\_00123832";  
protein\_coding"; old "TCONS\_00123832";  
protein\_coding"; old "TCONS\_00135737";  
protein\_coding"; old "TCONS\_00135737";  
protein\_coding"; old "TCONS\_00145205";  
protein\_coding"; old "TCONS\_00136059";  
protein\_coding"; old "TCONS\_00136059";  
protein\_coding"; old "TCONS\_00136059";

protein\_coding"; old "TCONS\_00159810";  
protein\_coding"; old "TCONS\_00159810";  
protein\_coding"; old "TCONS\_00136068";  
protein\_coding"; old "TCONS\_00136068";  
protein\_coding"; old "TCONS\_00136068";  
protein\_coding"; old "TCONS\_00136068";  
protein\_coding"; old "TCONS\_00136239";  
protein\_coding"; old "TCONS\_00136239";  
protein\_coding"; old "TCONS\_00136239";  
protein\_coding"; old "TCONS\_00136239";  
protein\_coding"; old "TCONS\_00151018";  
protein\_coding"; old "TCONS\_00154055";  
protein\_coding"; old "TCONS\_00154055";  
protein\_coding"; old "TCONS\_00154055";  
protein\_coding"; old "TCONS\_00154055";  
protein\_coding"; old "TCONS\_00151021";  
protein\_coding"; old "TCONS\_00151021";  
protein\_coding"; old "TCONS\_00151021";  
protein\_coding"; old "TCONS\_00136246";  
protein\_coding"; old "TCONS\_00136246";  
protein\_coding"; old "TCONS\_00136246";  
protein\_coding"; old "TCONS\_00136247";  
protein\_coding"; old "TCONS\_00136247";  
protein\_coding"; old "TCONS\_00136253";  
protein\_coding"; old "TCONS\_00136253";  
protein\_coding"; old "TCONS\_00136253";  
protein\_coding"; old "TCONS\_00136253";  
protein\_coding"; old "TCONS\_00141105";  
protein\_coding"; old "TCONS\_00141105";  
protein\_coding"; old "TCONS\_00145446";  
protein\_coding"; old "TCONS\_00145446";

protein\_coding"; old "TCONS\_00145446";  
protein\_coding"; old "TCONS\_00145446";  
protein\_coding"; old "TCONS\_00145446";  
protein\_coding"; old "TCONS\_00136256";  
protein\_coding"; old "TCONS\_00136256";  
protein\_coding"; old "TCONS\_00136256";  
protein\_coding"; old "TCONS\_00136532";  
protein\_coding"; old "TCONS\_00136532";  
protein\_coding"; old "TCONS\_00136574";  
protein\_coding"; old "TCONS\_00136574";  
protein\_coding"; old "TCONS\_00136574";  
protein\_coding"; old "TCONS\_00136582";  
protein\_coding"; old "TCONS\_00136582";  
protein\_coding"; old "TCONS\_00136582";  
protein\_coding"; old "TCONS\_00136584";  
protein\_coding"; old "TCONS\_00136584";  
protein\_coding"; old "TCONS\_00136584";  
protein\_coding"; old "TCONS\_00136584";  
protein\_coding"; old "TCONS\_00141363";  
protein\_coding"; old "TCONS\_00141363";  
protein\_coding"; old "TCONS\_00141363";  
protein\_coding"; old "TCONS\_00141376";  
protein\_coding"; old "TCONS\_00141376";  
protein\_coding"; old "TCONS\_00157162";  
protein\_coding"; old "TCONS\_00157162";  
protein\_coding"; old "TCONS\_00157162";  
protein\_coding"; old "TCONS\_00157162";  
protein\_coding"; old "TCONS\_00136598";  
protein\_coding"; old "TCONS\_00145741";  
protein\_coding"; old "TCONS\_00145741";  
protein\_coding"; old "TCONS\_00145741";  
protein\_coding"; old "TCONS\_00145770";



protein\_coding"; old "TCONS\_00145770";  
protein\_coding"; old "TCONS\_00145770";  
protein\_coding"; old "TCONS\_00141472";  
protein\_coding"; old "TCONS\_00141505";  
protein\_coding"; old "TCONS\_00145921";  
protein\_coding"; old "TCONS\_00136951";  
protein\_coding"; old "TCONS\_00136951";  
protein\_coding"; old "TCONS\_00136951";  
protein\_coding"; old "TCONS\_00136951";  
protein\_coding"; old "TCONS\_00146178";  
protein\_coding"; old "TCONS\_00146178";  
protein\_coding"; old "TCONS\_00146178";  
protein\_coding"; old "TCONS\_00146178";  
protein\_coding"; old "TCONS\_00136986";  
protein\_coding"; old "TCONS\_00136986";  
protein\_coding"; old "TCONS\_00157402";  
protein\_coding"; old "TCONS\_00141722";  
protein\_coding"; old "TCONS\_00141722";  
protein\_coding"; old "TCONS\_00141722";  
protein\_coding"; old "TCONS\_00141722";  
protein\_coding"; old "TCONS\_00137098";



protein\_coding"; old "TCONS\_00137744";  
protein\_coding"; old "TCONS\_00137744";  
protein\_coding"; old "TCONS\_00137744";  
protein\_coding"; old "TCONS\_00142441";  
protein\_coding"; old "TCONS\_00142441";  
protein\_coding"; old "TCONS\_00142441";  
protein\_coding"; old "TCONS\_00137747";  
protein\_coding"; old "TCONS\_00137747";  
protein\_coding"; old "TCONS\_00137747";  
protein\_coding"; old "TCONS\_00137747";  
protein\_coding"; old "TCONS\_00147375";  
protein\_coding"; old "TCONS\_00147375";  
protein\_coding"; old "TCONS\_00147375";  
protein\_coding"; old "TCONS\_00137750";  
protein\_coding"; old "TCONS\_00137750";  
protein\_coding"; old "TCONS\_00137756";  
protein\_coding"; old "TCONS\_00152000";  
protein\_coding"; old "TCONS\_00152000";  
protein\_coding"; old "TCONS\_00152000";  
protein\_coding"; old "TCONS\_00152004";  
protein\_coding"; old "TCONS\_00137769";  
protein\_coding"; old "TCONS\_00137769";  
protein\_coding"; old "TCONS\_00137769";  
protein\_coding"; old "TCONS\_00137769";

protein\_coding"; old "TCONS\_00137769";  
protein\_coding"; old "TCONS\_00137770";  
protein\_coding"; old "TCONS\_00154979";  
protein\_coding"; old "TCONS\_00154979";  
protein\_coding"; old "TCONS\_00154979";  
protein\_coding"; old "TCONS\_00154979";  
protein\_coding"; old "TCONS\_00137805";  
protein\_coding"; old "TCONS\_00137805";  
protein\_coding"; old "TCONS\_00137805";  
protein\_coding"; old "TCONS\_00137806";  
protein\_coding"; old "TCONS\_00137806";  
protein\_coding"; old "TCONS\_00137806";  
protein\_coding"; old "TCONS\_00137806";  
protein\_coding"; old "TCONS\_00137807";  
protein\_coding"; old "TCONS\_00137807";  
protein\_coding"; old "TCONS\_00137807";  
protein\_coding"; old "TCONS\_00147479";  
protein\_coding"; old "TCONS\_00138054";  
protein\_coding"; old "TCONS\_00142686";  
protein\_coding"; old "TCONS\_00138107";  
protein\_coding"; old "TCONS\_00138107";  
protein\_coding"; old "TCONS\_00147778";  
protein\_coding"; old "TCONS\_00147778";

protein\_coding"; old "TCONS\_00142763";  
protein\_coding"; old "TCONS\_00142763";  
protein\_coding"; old "TCONS\_00138190";  
protein\_coding"; old "TCONS\_00138190";  
protein\_coding"; old "TCONS\_00138190";  
protein\_coding"; old "TCONS\_00138190";  
protein\_coding"; old "TCONS\_00142834";  
protein\_coding"; old "TCONS\_00142834";  
protein\_coding"; old "TCONS\_00138265";  
protein\_coding"; old "TCONS\_00138265";  
protein\_coding"; old "TCONS\_00142903";  
protein\_coding"; old "TCONS\_00142903";  
protein\_coding"; old "TCONS\_00138347";  
protein\_coding"; old "TCONS\_00163885";  
protein\_coding"; old "TCONS\_00163885";  
protein\_coding"; old "TCONS\_00138543";  
protein\_coding"; old "TCONS\_00138543";  
protein\_coding"; old "TCONS\_00138543";  
protein\_coding"; old "TCONS\_00143173";  
protein\_coding"; old "TCONS\_00143173";  
protein\_coding"; old "TCONS\_00148345";  
protein\_coding"; old "TCONS\_00138749";  
protein\_coding"; old "TCONS\_00143268";  
protein\_coding"; old "TCONS\_00143268";  
protein\_coding"; old "TCONS\_00143268";  
protein\_coding"; old "TCONS\_00143268";  
protein\_coding"; old "TCONS\_00148457";  
protein\_coding"; old "TCONS\_00148457";

protein\_coding"; old "TCONS\_00148457";  
protein\_coding"; old "TCONS\_00148457";  
protein\_coding"; old "TCONS\_00148457";  
protein\_coding"; old "TCONS\_00148457";  
protein\_coding"; old "TCONS\_00148457";  
protein\_coding"; old "TCONS\_00148457";  
protein\_coding"; old "TCONS\_00143284";  
protein\_coding"; old "TCONS\_00143284";  
protein\_coding"; old "TCONS\_00138789";  
protein\_coding"; old "TCONS\_00138789";  
protein\_coding"; old "TCONS\_00138847";  
protein\_coding"; old "TCONS\_00138847";  
protein\_coding"; old "TCONS\_00138852";  
protein\_coding"; old "TCONS\_00138852";  
protein\_coding"; old "TCONS\_00143497";  
protein\_coding"; old "TCONS\_00139080";  
protein\_coding"; old "TCONS\_00152821";  
protein\_coding"; old "TCONS\_00152821";  
protein\_coding"; old "TCONS\_00152821";  
protein\_coding"; old "TCONS\_00158659";  
protein\_coding"; old "TCONS\_00158659";  
protein\_coding"; old "TCONS\_00143551";  
protein\_coding"; old "TCONS\_00143551";  
protein\_coding"; old "TCONS\_00143551";  
protein\_coding"; old "TCONS\_00143551";  
protein\_coding"; old "TCONS\_00143551";



protein\_coding"; old "TCONS\_00143589";  
protein\_coding"; old "TCONS\_00143589";  
"protein\_coding"; old "TCONS\_00143589";  
"protein\_coding"; old "TCONS\_00143589";  
"protein\_coding"; old "TCONS\_00143589";  
protein\_coding"; old "TCONS\_00139182";  
protein\_coding"; old "TCONS\_00139182";  
protein\_coding"; old "TCONS\_00139187";  
protein\_coding"; old "TCONS\_00139186";  
protein\_coding"; old "TCONS\_00139186";  
protein\_coding"; old "TCONS\_00139186";  
protein\_coding"; old "TCONS\_00148878";  
protein\_coding"; old "TCONS\_00148878";  
protein\_coding"; old "TCONS\_00148878";  
protein\_coding"; old "TCONS\_00148878";  
protein\_coding"; old "TCONS\_00139191";  
protein\_coding"; old "TCONS\_00139194";  
protein\_coding"; old "TCONS\_00143598";  
protein\_coding"; old "TCONS\_00143598";  
protein\_coding"; old "TCONS\_00161604";  
protein\_coding"; old "TCONS\_00161604";



protein\_coding"; old "TCONS\_00161604";  
protein\_coding"; old "TCONS\_00161604";  
protein\_coding"; old "TCONS\_00161604";  
protein\_coding"; old "TCONS\_00155809";  
protein\_coding"; old "TCONS\_00155809";  
protein\_coding"; old "TCONS\_00155809";  
protein\_coding"; old "TCONS\_00139196";  
protein\_coding"; old "TCONS\_00139195";  
protein\_coding"; old "TCONS\_00139241";  
protein\_coding"; old "TCONS\_00139241";  
protein\_coding"; old "TCONS\_00152907";  
protein\_coding"; old "TCONS\_00152907";  
protein\_coding"; old "TCONS\_00152907";  
protein\_coding"; old "TCONS\_00139242";  
protein\_coding"; old "TCONS\_00139242";  
protein\_coding"; old "TCONS\_00139242";  
protein\_coding"; old "TCONS\_00152921";  
protein\_coding"; old "TCONS\_00152921";  
protein\_coding"; old "TCONS\_00152921";  
protein\_coding"; old "TCONS\_00143912";  
protein\_coding"; old "TCONS\_00139564";  
protein\_coding"; old "TCONS\_00139564";  
protein\_coding"; old "TCONS\_00164520";

protein\_coding"; old "TCONS\_00164520";  
protein\_coding"; old "TCONS\_00144015";  
protein\_coding"; old "TCONS\_00139946";  
protein\_coding"; old "TCONS\_00139946";  
protein\_coding"; old "TCONS\_00139946";  
protein\_coding"; old "TCONS\_00139946";  
protein\_coding"; old "TCONS\_00140024";  
protein\_coding"; old "TCONS\_00140024";  
protein\_coding"; old "TCONS\_00144323";  
protein\_coding"; old "TCONS\_00144323";  
protein\_coding"; old "TCONS\_00156398";  
protein\_coding"; old "TCONS\_00164822";  
protein\_coding"; old "TCONS\_00164822";  
protein\_coding"; old "TCONS\_00164822";  
protein\_coding"; old "TCONS\_00150446";  
protein\_coding"; old "TCONS\_00140293";  
protein\_coding"; old "TCONS\_00144566";  
protein\_coding"; old "TCONS\_00144566";  
protein\_coding"; old "TCONS\_00156521";  
protein\_coding"; old "TCONS\_00156521";

protein\_coding"; old "TCONS\_00156521";  
protein\_coding"; old "TCONS\_00156521";  
protein\_coding"; old "TCONS\_00156521";  
protein\_coding"; old "TCONS\_00156521";  
protein\_coding"; old "TCONS\_00156521";  
protein\_coding"; old "TCONS\_00140386";  
protein\_coding"; old "TCONS\_00171192";  
protein\_coding"; old "TCONS\_00167497";  
protein\_coding"; old "TCONS\_00167567";  
protein\_coding"; old "TCONS\_00167567";  
protein\_coding"; old "TCONS\_00183030";  
protein\_coding"; old "TCONS\_00183030";  
protein\_coding"; old "TCONS\_00183030";  
protein\_coding"; old "TCONS\_00167835";  
protein\_coding"; old "TCONS\_00167918";  
protein\_coding"; old "TCONS\_00167918";  
protein\_coding"; old "TCONS\_00167920";

protein\_coding"; old "TCONS\_00167920";  
protein\_coding"; old "TCONS\_00168016";  
protein\_coding"; old "TCONS\_00168016";  
protein\_coding"; old "TCONS\_00168018";  
protein\_coding"; old "TCONS\_00168018";  
protein\_coding"; old "TCONS\_00168018";  
protein\_coding"; old "TCONS\_00168064";  
protein\_coding"; old "TCONS\_00168064";  
protein\_coding"; old "TCONS\_00168064";  
protein\_coding"; old "TCONS\_00168063";  
protein\_coding"; old "TCONS\_00168063";  
protein\_coding"; old "TCONS\_00168101";  
protein\_coding"; old "TCONS\_00168173";  
protein\_coding"; old "TCONS\_00168173";  
protein\_coding"; old "TCONS\_00168478";  
protein\_coding"; old "TCONS\_00168478";  
protein\_coding"; old "TCONS\_00168478";  
protein\_coding"; old "TCONS\_00168478";  
protein\_coding"; old "TCONS\_00168549";  
protein\_coding"; old "TCONS\_00168549";  
protein\_coding"; old "TCONS\_00172176";  
protein\_coding"; old "TCONS\_00172176";  
protein\_coding"; old "TCONS\_00183664";  
protein\_coding"; old "TCONS\_00183664";  
protein\_coding"; old "TCONS\_00183664";  
protein\_coding"; old "TCONS\_00168776";  
protein\_coding"; old "TCONS\_00168776";  
protein\_coding"; old "TCONS\_00168995";  
protein\_coding"; old "TCONS\_00168995";  
protein\_coding"; old "TCONS\_00183950";  
protein\_coding"; old "TCONS\_00183950";  
protein\_coding"; old "TCONS\_00183950";  
protein\_coding"; old "TCONS\_00169285";  
protein\_coding"; old "TCONS\_00169285";  
protein\_coding"; old "TCONS\_00169287";

protein\_coding"; old "TCONS\_00179639";  
protein\_coding"; old "TCONS\_00169415";  
protein\_coding"; old "TCONS\_00169415";  
protein\_coding"; old "TCONS\_00169415";  
protein\_coding"; old "TCONS\_00176520";  
protein\_coding"; old "TCONS\_00176520";  
protein\_coding"; old "TCONS\_00169464";  
protein\_coding"; old "TCONS\_00172982";  
protein\_coding"; old "TCONS\_00169640";  
protein\_coding"; old "TCONS\_00169696";  
protein\_coding"; old "TCONS\_00169696";  
protein\_coding"; old "TCONS\_00169700";  
protein\_coding"; old "TCONS\_00169850";  
protein\_coding"; old "TCONS\_00169850";  
protein\_coding"; old "TCONS\_00186435";  
protein\_coding"; old "TCONS\_00173122";  
protein\_coding"; old "TCONS\_00173122";  
protein\_coding"; old "TCONS\_00170053";  
protein\_coding"; old "TCONS\_00170053";

protein\_coding"; old "TCONS\_00170053";  
protein\_coding"; old "TCONS\_00170053";  
protein\_coding"; old "TCONS\_00170053";  
protein\_coding"; old "TCONS\_00170053";  
protein\_coding"; old "TCONS\_00173281";  
protein\_coding"; old "TCONS\_00170065";  
protein\_coding"; old "TCONS\_00170065";  
protein\_coding"; old "TCONS\_00177106";  
protein\_coding"; old "TCONS\_00177106";  
protein\_coding"; old "TCONS\_00180129";  
protein\_coding"; old "TCONS\_00180129";  
protein\_coding"; old "TCONS\_00180129";  
protein\_coding"; old "TCONS\_00180129";  
protein\_coding"; old "TCONS\_00173402";  
protein\_coding"; old "TCONS\_00173402";  
protein\_coding"; old "TCONS\_00170187";  
protein\_coding"; old "TCONS\_00170187";  
protein\_coding"; old "TCONS\_00170187";  
protein\_coding"; old "TCONS\_00173416";  
protein\_coding"; old "TCONS\_00173416";  
protein\_coding"; old "TCONS\_00170188";  
protein\_coding"; old "TCONS\_00170188";  
protein\_coding"; old "TCONS\_00170188";  
protein\_coding"; old "TCONS\_00170188";  
protein\_coding"; old "TCONS\_00170189";  
protein\_coding"; old "TCONS\_00170189";  
protein\_coding"; old "TCONS\_00170189";  
protein\_coding"; old "TCONS\_00170189";  
protein\_coding"; old "TCONS\_00173417";  
protein\_coding"; old "TCONS\_00173417";  
protein\_coding"; old "TCONS\_00170220";  
protein\_coding"; old "TCONS\_00170220";



protein\_coding"; old "TCONS\_00171057";  
"protein\_coding"; old "TCONS\_00171057";  
"protein\_coding"; old "TCONS\_00171057";  
protein\_coding"; old "TCONS\_00194878";  
protein\_coding"; old "TCONS\_00194878";  
protein\_coding"; old "TCONS\_00194878";  
protein\_coding"; old "TCONS\_00194878";  
protein\_coding"; old "TCONS\_00194904";  
protein\_coding"; old "TCONS\_00194904";  
protein\_coding"; old "TCONS\_00194904";  
protein\_coding"; old "TCONS\_00195023";  
protein\_coding"; old "TCONS\_00198750";  
protein\_coding"; old "TCONS\_00198750";  
protein\_coding"; old "TCONS\_00198750";  
protein\_coding"; old "TCONS\_00191340";  
protein\_coding"; old "TCONS\_00191340";  
protein\_coding"; old "TCONS\_00191445";  
protein\_coding"; old "TCONS\_00191453";  
protein\_coding"; old "TCONS\_00191453";  
protein\_coding"; old "TCONS\_00191453";



protein\_coding"; old "TCONS\_00203748";  
protein\_coding"; old "TCONS\_00191462";  
protein\_coding"; old "TCONS\_00191465";  
protein\_coding"; old "TCONS\_00195191";  
protein\_coding"; old "TCONS\_00191525";  
protein\_coding"; old "TCONS\_00191525";  
protein\_coding"; old "TCONS\_00191525";  
protein\_coding"; old "TCONS\_00191526";  
protein\_coding"; old "TCONS\_00191526";  
protein\_coding"; old "TCONS\_00191527";  
protein\_coding"; old "TCONS\_00191527";  
protein\_coding"; old "TCONS\_00195384";  
protein\_coding"; old "TCONS\_00195383";  
protein\_coding"; old "TCONS\_00195382";  
protein\_coding"; old "TCONS\_00195382";  
protein\_coding"; old "TCONS\_00195382";

protein\_coding"; old "TCONS\_00195382";  
protein\_coding"; old "TCONS\_00195382";  
protein\_coding"; old "TCONS\_00195382";  
protein\_coding"; old "TCONS\_00191662";  
protein\_coding"; old "TCONS\_00191662";  
protein\_coding"; old "TCONS\_00208573";  
protein\_coding"; old "TCONS\_00208573";  
protein\_coding"; old "TCONS\_00195576";  
protein\_coding"; old "TCONS\_00195576";  
protein\_coding"; old "TCONS\_00191867";  
protein\_coding"; old "TCONS\_00191867";  
protein\_coding"; old "TCONS\_00191867";  
protein\_coding"; old "TCONS\_00191893";  
protein\_coding"; old "TCONS\_00191893";  
protein\_coding"; old "TCONS\_00191893";  
protein\_coding"; old "TCONS\_00191943";  
protein\_coding"; old "TCONS\_00211098";  
protein\_coding"; old "TCONS\_00211098";  
protein\_coding"; old "TCONS\_00195758";  
protein\_coding"; old "TCONS\_00192132";  
protein\_coding"; old "TCONS\_00192140";  
protein\_coding"; old "TCONS\_00192140";  
protein\_coding"; old "TCONS\_00192140";  
protein\_coding"; old "TCONS\_00195832";  
protein\_coding"; old "TCONS\_00195832";  
protein\_coding"; old "TCONS\_00195832";  
protein\_coding"; old "TCONS\_00195831";

protein\_coding"; old "TCONS\_00195831";  
protein\_coding"; old "TCONS\_00195831";  
protein\_coding"; old "TCONS\_00195831";  
protein\_coding"; old "TCONS\_00192153";  
protein\_coding"; old "TCONS\_00192153";  
protein\_coding"; old "TCONS\_00192153";  
protein\_coding"; old "TCONS\_00195841";  
protein\_coding"; old "TCONS\_00195841";  
protein\_coding"; old "TCONS\_00196047";  
protein\_coding"; old "TCONS\_00196047";  
protein\_coding"; old "TCONS\_00192391";  
protein\_coding"; old "TCONS\_00192391";  
protein\_coding"; old "TCONS\_00192415";  
protein\_coding"; old "TCONS\_00204390";  
protein\_coding"; old "TCONS\_00204390";  
protein\_coding"; old "TCONS\_00204390";  
protein\_coding"; old "TCONS\_00204390";  
protein\_coding"; old "TCONS\_00200248";  
protein\_coding"; old "TCONS\_00200248";  
protein\_coding"; old "TCONS\_00200248";  
protein\_coding"; old "TCONS\_00200248";  
protein\_coding"; old "TCONS\_00200264";  
protein\_coding"; old "TCONS\_00204399";  
protein\_coding"; old "TCONS\_00204399";  
protein\_coding"; old "TCONS\_00204399";  
protein\_coding"; old "TCONS\_00196131";  
protein\_coding"; old "TCONS\_00196131";  
protein\_coding"; old "TCONS\_00196131";  
protein\_coding"; old "TCONS\_00196131";

protein\_coding"; old "TCONS\_00196131";  
protein\_coding"; old "TCONS\_00200409";  
protein\_coding"; old "TCONS\_00200409";  
protein\_coding"; old "TCONS\_00200409";  
protein\_coding"; old "TCONS\_00200409";  
protein\_coding"; old "TCONS\_00204487";  
protein\_coding"; old "TCONS\_00192621";  
protein\_coding"; old "TCONS\_00200507";  
protein\_coding"; old "TCONS\_00200507";  
protein\_coding"; old "TCONS\_00200507";  
protein\_coding"; old "TCONS\_00200507";  
protein\_coding"; old "TCONS\_00192623";  
protein\_coding"; old "TCONS\_00192623";  
protein\_coding"; old "TCONS\_00192623";  
protein\_coding"; old "TCONS\_00192636";  
protein\_coding"; old "TCONS\_00211493";  
protein\_coding"; old "TCONS\_00211493";  
protein\_coding"; old "TCONS\_00211493";  
protein\_coding"; old "TCONS\_00211493";  
protein\_coding"; old "TCONS\_00211493";

protein\_coding"; old "TCONS\_00211493";  
protein\_coding"; old "TCONS\_00200524";  
protein\_coding"; old "TCONS\_00192638";  
protein\_coding"; old "TCONS\_00192638";  
protein\_coding"; old "TCONS\_00192638";  
protein\_coding"; old "TCONS\_00192640";  
protein\_coding"; old "TCONS\_00192640";  
protein\_coding"; old "TCONS\_00196381";  
protein\_coding"; old "TCONS\_00196381";  
protein\_coding"; old "TCONS\_00196381";  
protein\_coding"; old "TCONS\_00196381";  
protein\_coding"; old "TCONS\_00200701";  
protein\_coding"; old "TCONS\_00200701";  
protein\_coding"; old "TCONS\_00196394";  
protein\_coding"; old "TCONS\_00196412";  
protein\_coding"; old "TCONS\_00196412";  
protein\_coding"; old "TCONS\_00193028";  
protein\_coding"; old "TCONS\_00193036";  
protein\_coding"; old "TCONS\_00193036";  
protein\_coding"; old "TCONS\_00193036";

protein\_coding"; old "TCONS\_00207297";  
protein\_coding"; old "TCONS\_00207297";  
protein\_coding"; old "TCONS\_00193307";  
protein\_coding"; old "TCONS\_00196912";  
protein\_coding"; old "TCONS\_00193405";  
protein\_coding"; old "TCONS\_00193405";  
protein\_coding"; old "TCONS\_00193518";  
protein\_coding"; old "TCONS\_00193518";  
protein\_coding"; old "TCONS\_00193518";  
protein\_coding"; old "TCONS\_00193518";  
protein\_coding"; old "TCONS\_00193561";  
protein\_coding"; old "TCONS\_00193561";  
protein\_coding"; old "TCONS\_00201803";  
protein\_coding"; old "TCONS\_00205163";  
protein\_coding"; old "TCONS\_00193583";  
protein\_coding"; old "TCONS\_00193583";  
protein\_coding"; old "TCONS\_00193583";  
protein\_coding"; old "TCONS\_00193583";  
protein\_coding"; old "TCONS\_00193583";

protein\_coding"; old "TCONS\_00193583";  
protein\_coding"; old "TCONS\_00193583";  
protein\_coding"; old "TCONS\_00193583";  
protein\_coding"; old "TCONS\_00193593";  
protein\_coding"; old "TCONS\_00193593";  
protein\_coding"; old "TCONS\_00193593";  
protein\_coding"; old "TCONS\_00193592";  
protein\_coding"; old "TCONS\_00193592";  
protein\_coding"; old "TCONS\_00193592";  
protein\_coding"; old "TCONS\_00205169";  
protein\_coding"; old "TCONS\_00201813";  
protein\_coding"; old "TCONS\_00201813";  
protein\_coding"; old "TCONS\_00193623";  
protein\_coding"; old "TCONS\_00193623";  
protein\_coding"; old "TCONS\_00193623";  
protein\_coding"; old "TCONS\_00205191";  
protein\_coding"; old "TCONS\_00207479";  
protein\_coding"; old "TCONS\_00193725";  
protein\_coding"; old "TCONS\_00193725";  
protein\_coding"; old "TCONS\_00197281";  
protein\_coding"; old "TCONS\_00197281";  
protein\_coding"; old "TCONS\_00197281";

protein\_coding"; old "TCONS\_00201998";  
protein\_coding"; old "TCONS\_00201998";  
protein\_coding"; old "TCONS\_00201998";  
protein\_coding"; old "TCONS\_00193886";  
protein\_coding"; old "TCONS\_00207654";  
protein\_coding"; old "TCONS\_00197474";  
protein\_coding"; old "TCONS\_00197474";  
protein\_coding"; old "TCONS\_00197474";  
protein\_coding"; old "TCONS\_00197474";  
protein\_coding"; old "TCONS\_00197476";  
protein\_coding"; old "TCONS\_00197476";  
protein\_coding"; old "TCONS\_00194081";  
protein\_coding"; old "TCONS\_00194081";  
protein\_coding"; old "TCONS\_00197575";  
protein\_coding"; old "TCONS\_00197575";  
protein\_coding"; old "TCONS\_00205495";  
protein\_coding"; old "TCONS\_00205495";  
protein\_coding"; old "TCONS\_00194155";  
protein\_coding"; old "TCONS\_00194155";  
protein\_coding"; old "TCONS\_00197787";  
protein\_coding"; old "TCONS\_00210207";  
protein\_coding"; old "TCONS\_00210207";  
protein\_coding"; old "TCONS\_00210207";  
protein\_coding"; old "TCONS\_00198023";  
protein\_coding"; old "TCONS\_00198023";  
protein\_coding"; old "TCONS\_00198023";  
protein\_coding"; old "TCONS\_00198023";  
protein\_coding"; old "TCONS\_00198023";



protein\_coding"; old "TCONS\_00194547";  
protein\_coding"; old "TCONS\_00194547";  
protein\_coding"; old "TCONS\_00194625";  
protein\_coding"; old "TCONS\_00194625";  
protein\_coding"; old "TCONS\_00194643";  
protein\_coding"; old "TCONS\_00194643";  
protein\_coding"; old "TCONS\_00194643";  
protein\_coding"; old "TCONS\_00194674";  
protein\_coding"; old "TCONS\_00194674";  
protein\_coding"; old "TCONS\_00194675";  
protein\_coding"; old "TCONS\_00194675";  
protein\_coding"; old "TCONS\_00216789";  
protein\_coding"; old "TCONS\_00235896";  
protein\_coding"; old "TCONS\_00235896";  
protein\_coding"; old "TCONS\_00235896";  
protein\_coding"; old "TCONS\_00220677";  
protein\_coding"; old "TCONS\_00220677";  
protein\_coding"; old "TCONS\_00229013";  
protein\_coding"; old "TCONS\_00229013";  
protein\_coding"; old "TCONS\_00229013";  
protein\_coding"; old "TCONS\_00216985";  
protein\_coding"; old "TCONS\_00216985";  
protein\_coding"; old "TCONS\_00217049";  
protein\_coding"; old "TCONS\_00231541";  
protein\_coding"; old "TCONS\_00231541";  
protein\_coding"; old "TCONS\_00231541";



protein\_coding"; old "TCONS\_00224629";  
protein\_coding"; old "TCONS\_00224630";  
"protein\_coding"; old "TCONS\_00224630";  
protein\_coding"; old "TCONS\_00217303";  
"protein\_coding"; old "TCONS\_00217303";  
protein\_coding"; old "TCONS\_00233928";  
protein\_coding"; old "TCONS\_00233928";  
protein\_coding"; old "TCONS\_00217313";  
protein\_coding"; old "TCONS\_00217313";  
protein\_coding"; old "TCONS\_00217313";  
protein\_coding"; old "TCONS\_00224637";  
protein\_coding"; old "TCONS\_00224637";  
protein\_coding"; old "TCONS\_00217317";  
protein\_coding"; old "TCONS\_00217317";  
protein\_coding"; old "TCONS\_00217317";





protein\_coding"; old "TCONS\_00221577";  
protein\_coding"; old "TCONS\_00221577";  
protein\_coding"; old "TCONS\_00217864";  
protein\_coding"; old "TCONS\_00217864";  
protein\_coding"; old "TCONS\_00217864";  
protein\_coding"; old "TCONS\_00217871";  
protein\_coding"; old "TCONS\_00229683";  
protein\_coding"; old "TCONS\_00229683";  
protein\_coding"; old "TCONS\_00229683";  
protein\_coding"; old "TCONS\_00234360";  
protein\_coding"; old "TCONS\_00234360";  
protein\_coding"; old "TCONS\_00218020";  
protein\_coding"; old "TCONS\_00218020";  
protein\_coding"; old "TCONS\_00225642";  
protein\_coding"; old "TCONS\_00218224";  
protein\_coding"; old "TCONS\_00218224";  
protein\_coding"; old "TCONS\_00218264";  
protein\_coding"; old "TCONS\_00218264";  
protein\_coding"; old "TCONS\_00218264";  
protein\_coding"; old "TCONS\_00218264";  
protein\_coding"; old "TCONS\_00218265";  
protein\_coding"; old "TCONS\_00218265";  
protein\_coding"; old "TCONS\_00221939";  
protein\_coding"; old "TCONS\_00221939";  
protein\_coding"; old "TCONS\_00236774";  
protein\_coding"; old "TCONS\_00236774";  
protein\_coding"; old "TCONS\_00234544";  
protein\_coding"; old "TCONS\_00218321";  
protein\_coding"; old "TCONS\_00218321";  
protein\_coding"; old "TCONS\_00218321";

protein\_coding"; old "TCONS\_00218321";  
protein\_coding"; old "TCONS\_00218321";  
protein\_coding"; old "TCONS\_00218321";  
protein\_coding"; old "TCONS\_00221979";  
protein\_coding"; old "TCONS\_00221979";  
protein\_coding"; old "TCONS\_00221979";  
protein\_coding"; old "TCONS\_00221979";  
protein\_coding"; old "TCONS\_00218337";  
protein\_coding"; old "TCONS\_00218337";  
protein\_coding"; old "TCONS\_00222000";  
protein\_coding"; old "TCONS\_00222000";  
protein\_coding"; old "TCONS\_00222000";  
protein\_coding"; old "TCONS\_00222000";  
protein\_coding"; old "TCONS\_00234576";  
protein\_coding"; old "TCONS\_00234576";  
protein\_coding"; old "TCONS\_00234576";  
protein\_coding"; old "TCONS\_00234576";  
protein\_coding"; old "TCONS\_00218366";  
protein\_coding"; old "TCONS\_00218367";  
protein\_coding"; old "TCONS\_00218414";  
protein\_coding"; old "TCONS\_00218414";  
protein\_coding"; old "TCONS\_00222048";





protein\_coding"; old "TCONS\_00226625";  
protein\_coding"; old "TCONS\_00226625";  
protein\_coding"; old "TCONS\_00226625";  
protein\_coding"; old "TCONS\_00226624";  
protein\_coding"; old "TCONS\_00226624";  
protein\_coding"; old "TCONS\_00232640";  
protein\_coding"; old "TCONS\_00232640";  
protein\_coding"; old "TCONS\_00226627";  
protein\_coding"; old "TCONS\_00226627";  
protein\_coding"; old "TCONS\_00218888";  
protein\_coding"; old "TCONS\_00218888";  
protein\_coding"; old "TCONS\_00234909";  
protein\_coding"; old "TCONS\_00226693";  
protein\_coding"; old "TCONS\_00226693";  
protein\_coding"; old "TCONS\_00226693";  
protein\_coding"; old "TCONS\_00226693";  
protein\_coding"; old "TCONS\_00239314";  
protein\_coding"; old "TCONS\_00239314";  
protein\_coding"; old "TCONS\_00239314";  
protein\_coding"; old "TCONS\_00222565";  
protein\_coding"; old "TCONS\_00222565";  
protein\_coding"; old "TCONS\_00222565";  
protein\_coding"; old "TCONS\_00222565";  
protein\_coding"; old "TCONS\_00219022";  
protein\_coding"; old "TCONS\_00219022";  
protein\_coding"; old "TCONS\_00219024";  
protein\_coding"; old "TCONS\_00219040";  
protein\_coding"; old "TCONS\_00219040";  
protein\_coding"; old "TCONS\_00219159";  
protein\_coding"; old "TCONS\_00232797";

protein\_coding"; old "TCONS\_00232797";  
protein\_coding"; old "TCONS\_00232797";  
protein\_coding"; old "TCONS\_00219232";  
protein\_coding"; old "TCONS\_00219232";  
protein\_coding"; old "TCONS\_00222787";  
protein\_coding"; old "TCONS\_00222787";  
protein\_coding"; old "TCONS\_00222787";  
protein\_coding"; old "TCONS\_00219261";  
protein\_coding"; old "TCONS\_00219261";  
protein\_coding"; old "TCONS\_00219261";  
protein\_coding"; old "TCONS\_00222814";  
protein\_coding"; old "TCONS\_00219275";  
protein\_coding"; old "TCONS\_00219275";  
protein\_coding"; old "TCONS\_00219290";  
protein\_coding"; old "TCONS\_00219358";  
protein\_coding"; old "TCONS\_00219358";  
protein\_coding"; old "TCONS\_00219359";  
protein\_coding"; old "TCONS\_00219359";  
protein\_coding"; old "TCONS\_00219359";  
protein\_coding"; old "TCONS\_00219359";  
protein\_coding"; old "TCONS\_00230627";  
protein\_coding"; old "TCONS\_00230627";  
protein\_coding"; old "TCONS\_00230627";  
protein\_coding"; old "TCONS\_00219471";  
protein\_coding"; old "TCONS\_00219472";  
protein\_coding"; old "TCONS\_00219472";

protein\_coding"; old "TCONS\_00219472";  
protein\_coding"; old "TCONS\_00219472";  
protein\_coding"; old "TCONS\_00219472";  
protein\_coding"; old "TCONS\_00219472";  
protein\_coding"; old "TCONS\_00219472";  
protein\_coding"; old "TCONS\_00219504";  
protein\_coding"; old "TCONS\_00239585";  
protein\_coding"; old "TCONS\_00239585";  
protein\_coding"; old "TCONS\_00239585";  
protein\_coding"; old "TCONS\_00227439";  
protein\_coding"; old "TCONS\_00227439";  
protein\_coding"; old "TCONS\_00219558";  
protein\_coding"; old "TCONS\_00219558";  
protein\_coding"; old "TCONS\_00219558";  
protein\_coding"; old "TCONS\_00227509";  
protein\_coding"; old "TCONS\_00227509";  
protein\_coding"; old "TCONS\_00219630";  
protein\_coding"; old "TCONS\_00219630";  
protein\_coding"; old "TCONS\_00219630";  
protein\_coding"; old "TCONS\_00219631";  
protein\_coding"; old "TCONS\_00219631";  
protein\_coding"; old "TCONS\_00219635";  
protein\_coding"; old "TCONS\_00219635";  
protein\_coding"; old "TCONS\_00227680";  
protein\_coding"; old "TCONS\_00227680";  
protein\_coding"; old "TCONS\_00227680";  
protein\_coding"; old "TCONS\_00219755";  
protein\_coding"; old "TCONS\_00219755";  
protein\_coding"; old "TCONS\_00219755";  
protein\_coding"; old "TCONS\_00219754";  
protein\_coding"; old "TCONS\_00219754";  
protein\_coding"; old "TCONS\_00237643";  
protein\_coding"; old "TCONS\_00237643";  
protein\_coding"; old "TCONS\_00237643";  
protein\_coding"; old "TCONS\_00223331";



protein\_coding"; old "TCONS\_00227993";  
protein\_coding"; old "TCONS\_00227993";  
protein\_coding"; old "TCONS\_00223422";  
protein\_coding"; old "TCONS\_00223422";  
protein\_coding"; old "TCONS\_00223422";  
protein\_coding"; old "TCONS\_00223422";  
protein\_coding"; old "TCONS\_00219973";  
protein\_coding"; old "TCONS\_00219973";  
protein\_coding"; old "TCONS\_00228145";  
protein\_coding"; old "TCONS\_00228145";  
protein\_coding"; old "TCONS\_00228145";  
protein\_coding"; old "TCONS\_00235532";  
protein\_coding"; old "TCONS\_00235532";  
protein\_coding"; old "TCONS\_00231104";  
protein\_coding"; old "TCONS\_00231104";  
protein\_coding"; old "TCONS\_00220221";  
protein\_coding"; old "TCONS\_00220242";  
protein\_coding"; old "TCONS\_00220242";  
protein\_coding"; old "TCONS\_00220259";  
protein\_coding"; old "TCONS\_00220259";  
protein\_coding"; old "TCONS\_00231139";  
protein\_coding"; old "TCONS\_00228525";  
protein\_coding"; old "TCONS\_00228525";  
protein\_coding"; old "TCONS\_00220286";  
protein\_coding"; old "TCONS\_00220286";  
protein\_coding"; old "TCONS\_00220286";  
protein\_coding"; old "TCONS\_00220287";  
protein\_coding"; old "TCONS\_00220287";  
protein\_coding"; old "TCONS\_00220287";  
protein\_coding"; old "TCONS\_00220287";  
protein\_coding"; old "TCONS\_00220287";











protein\_coding"; old "TCONS\_00255198";  
protein\_coding"; old "TCONS\_00243159";  
protein\_coding"; old "TCONS\_00243158";  
protein\_coding"; old "TCONS\_00243289";  
protein\_coding"; old "TCONS\_00243289";  
protein\_coding"; old "TCONS\_00257911";  
protein\_coding"; old "TCONS\_00257911";  
protein\_coding"; old "TCONS\_00257911";  
protein\_coding"; old "TCONS\_00247395";  
protein\_coding"; old "TCONS\_00247395";  
protein\_coding"; old "TCONS\_00243328";  
protein\_coding"; old "TCONS\_00247437";  
protein\_coding"; old "TCONS\_00247608";  
protein\_coding"; old "TCONS\_00247608";  
protein\_coding"; old "TCONS\_00243551";  
protein\_coding"; old "TCONS\_00243551";

protein\_coding"; old "TCONS\_00243551";  
protein\_coding"; old "TCONS\_00243551";  
protein\_coding"; old "TCONS\_00243551";  
protein\_coding"; old "TCONS\_00255479";  
protein\_coding"; old "TCONS\_00255479";  
protein\_coding"; old "TCONS\_00255479";  
protein\_coding"; old "TCONS\_00243552";  
protein\_coding"; old "TCONS\_00243552";  
protein\_coding"; old "TCONS\_00243555";  
protein\_coding"; old "TCONS\_00243555";  
protein\_coding"; old "TCONS\_00243558";  
protein\_coding"; old "TCONS\_00243558";  
protein\_coding"; old "TCONS\_00243558";  
protein\_coding"; old "TCONS\_00260510";  
protein\_coding"; old "TCONS\_00260510";  
protein\_coding"; old "TCONS\_00243573";  
protein\_coding"; old "TCONS\_00255510";  
protein\_coding"; old "TCONS\_00255510";  
protein\_coding"; old "TCONS\_00255510";  
protein\_coding"; old "TCONS\_00247757";  
protein\_coding"; old "TCONS\_00247757";  
protein\_coding"; old "TCONS\_00247778";  
protein\_coding"; old "TCONS\_00247778";  
protein\_coding"; old "TCONS\_00247778";  
protein\_coding"; old "TCONS\_00247779";

protein\_coding"; old "TCONS\_00247779";  
protein\_coding"; old "TCONS\_00251819";  
protein\_coding"; old "TCONS\_00251819";  
protein\_coding"; old "TCONS\_00247798";  
protein\_coding"; old "TCONS\_00247798";  
protein\_coding"; old "TCONS\_00243891";  
protein\_coding"; old "TCONS\_00243891";  
protein\_coding"; old "TCONS\_00243891";  
protein\_coding"; old "TCONS\_00243891";  
protein\_coding"; old "TCONS\_00244100";  
protein\_coding"; old "TCONS\_00244100";  
protein\_coding"; old "TCONS\_00244101";  
protein\_coding"; old "TCONS\_00244101";  
protein\_coding"; old "TCONS\_00244101";  
protein\_coding"; old "TCONS\_00260851";  
protein\_coding"; old "TCONS\_00255877";  
protein\_coding"; old "TCONS\_00244103";  
protein\_coding"; old "TCONS\_00244178";  
protein\_coding"; old "TCONS\_00244178";

protein\_coding"; old "TCONS\_00244178";  
protein\_coding"; old "TCONS\_00244178";  
protein\_coding"; old "TCONS\_00252232";  
protein\_coding"; old "TCONS\_00252232";  
protein\_coding"; old "TCONS\_00252232";  
protein\_coding"; old "TCONS\_00252242";  
protein\_coding"; old "TCONS\_00252242";  
protein\_coding"; old "TCONS\_00252242";  
protein\_coding"; old "TCONS\_00252242";  
protein\_coding"; old "TCONS\_00244219";  
protein\_coding"; old "TCONS\_00244219";  
protein\_coding"; old "TCONS\_00244219";  
protein\_coding"; old "TCONS\_00244219";  
protein\_coding"; old "TCONS\_00260909";  
protein\_coding"; old "TCONS\_00244224";  
protein\_coding"; old "TCONS\_00244224";  
protein\_coding"; old "TCONS\_00244448";  
protein\_coding"; old "TCONS\_00244448";  
protein\_coding"; old "TCONS\_00244448";  
protein\_coding"; old "TCONS\_00248335";  
protein\_coding"; old "TCONS\_00248335";  
protein\_coding"; old "TCONS\_00248335";  
protein\_coding"; old "TCONS\_00248335";  
protein\_coding"; old "TCONS\_00248334";  
protein\_coding"; old "TCONS\_00244508";  
protein\_coding"; old "TCONS\_00244508";  
protein\_coding"; old "TCONS\_00244508";  
protein\_coding"; old "TCONS\_00252522";

protein\_coding"; old "TCONS\_00252522";  
protein\_coding"; old "TCONS\_00252522";  
protein\_coding"; old "TCONS\_00252522";  
protein\_coding"; old "TCONS\_00252522";  
protein\_coding"; old "TCONS\_00252522";  
protein\_coding"; old "TCONS\_00252522";  
protein\_coding"; old "TCONS\_00248403";  
protein\_coding"; old "TCONS\_00256124";  
protein\_coding"; old "TCONS\_00256125";  
protein\_coding"; old "TCONS\_00244582";  
protein\_coding"; old "TCONS\_00244582";  
protein\_coding"; old "TCONS\_00244582";  
protein\_coding"; old "TCONS\_00244582";  
protein\_coding"; old "TCONS\_00252553";  
protein\_coding"; old "TCONS\_00252553";  
protein\_coding"; old "TCONS\_00244589";  
protein\_coding"; old "TCONS\_00244589";  
protein\_coding"; old "TCONS\_00244664";



protein\_coding"; old "TCONS\_00245008";  
protein\_coding"; old "TCONS\_00245008";  
protein\_coding"; old "TCONS\_00245008";  
"protein\_coding"; old "TCONS\_00245008";  
protein\_coding"; old "TCONS\_00256415";  
protein\_coding"; old "TCONS\_00256415";  
protein\_coding"; old "TCONS\_00245128";  
protein\_coding"; old "TCONS\_00245128";  
protein\_coding"; old "TCONS\_00245128";  
protein\_coding"; old "TCONS\_00245128";  
protein\_coding"; old "TCONS\_00258968";  
protein\_coding"; old "TCONS\_00245483";  
protein\_coding"; old "TCONS\_00245483";  
protein\_coding"; old "TCONS\_00245483";  
protein\_coding"; old "TCONS\_00253604";  
protein\_coding"; old "TCONS\_00253604";  
protein\_coding"; old "TCONS\_00253604";  
protein\_coding"; old "TCONS\_00253604";  
protein\_coding"; old "TCONS\_00261677";  
protein\_coding"; old "TCONS\_00261677";  
protein\_coding"; old "TCONS\_00245581";  
protein\_coding"; old "TCONS\_00245581";  
protein\_coding"; old "TCONS\_00245589";  
protein\_coding"; old "TCONS\_00245589";  
protein\_coding"; old "TCONS\_00245589";  
protein\_coding"; old "TCONS\_00245589";  
protein\_coding"; old "TCONS\_00259191";  
protein\_coding"; old "TCONS\_00259191";  
protein\_coding"; old "TCONS\_00249265";  
protein\_coding"; old "TCONS\_00249265";  
protein\_coding"; old "TCONS\_00253745";  
protein\_coding"; old "TCONS\_00253745";  
protein\_coding"; old "TCONS\_00253745";  
protein\_coding"; old "TCONS\_00245590";  
protein\_coding"; old "TCONS\_00245590";  
protein\_coding"; old "TCONS\_00245590";  
protein\_coding"; old "TCONS\_00249267";



protein\_coding"; old "TCONS\_00249267";  
protein\_coding"; old "TCONS\_00256708";  
protein\_coding"; old "TCONS\_00256708";  
protein\_coding"; old "TCONS\_00256708";  
protein\_coding"; old "TCONS\_00249292";  
protein\_coding"; old "TCONS\_00249292";  
protein\_coding"; old "TCONS\_00249292";  
protein\_coding"; old "TCONS\_00249292";  
protein\_coding"; old "TCONS\_00245609";  
protein\_coding"; old "TCONS\_00245609";  
protein\_coding"; old "TCONS\_00245609";  
protein\_coding"; old "TCONS\_00245609";  
protein\_coding"; old "TCONS\_00253770";  
protein\_coding"; old "TCONS\_00253770";  
protein\_coding"; old "TCONS\_00253770";  
protein\_coding"; old "TCONS\_00253770";  
protein\_coding"; old "TCONS\_00249298";  
protein\_coding"; old "TCONS\_00249298";  
protein\_coding"; old "TCONS\_00249298";  
protein\_coding"; old "TCONS\_00249298";  
protein\_coding"; old "TCONS\_00249297";  
protein\_coding"; old "TCONS\_00249297";  
protein\_coding"; old "TCONS\_00249297";  
protein\_coding"; old "TCONS\_00249297";  
protein\_coding"; old "TCONS\_00245620";  
protein\_coding"; old "TCONS\_00245620";  
protein\_coding"; old "TCONS\_00245632";  
protein\_coding"; old "TCONS\_00245632";  
protein\_coding"; old "TCONS\_00245634";  
protein\_coding"; old "TCONS\_00245634";  
protein\_coding"; old "TCONS\_00245644";  
protein\_coding"; old "TCONS\_00245644";  
protein\_coding"; old "TCONS\_00245644";  
protein\_coding"; old "TCONS\_00245644";  
protein\_coding"; old "TCONS\_00245644";

protein\_coding"; old "TCONS\_00245644";  
protein\_coding"; old "TCONS\_00245644";  
protein\_coding"; old "TCONS\_00259234";  
protein\_coding"; old "TCONS\_00266437";  
protein\_coding"; old "TCONS\_00266437";  
protein\_coding"; old "TCONS\_00266437";  
protein\_coding"; old "TCONS\_00253801";  
protein\_coding"; old "TCONS\_00253801";  
protein\_coding"; old "TCONS\_00253801";  
protein\_coding"; old "TCONS\_00249339";  
protein\_coding"; old "TCONS\_00245702";  
protein\_coding"; old "TCONS\_00245820";  
protein\_coding"; old "TCONS\_00245820";  
protein\_coding"; old "TCONS\_00259402";  
protein\_coding"; old "TCONS\_00256938";  
protein\_coding"; old "TCONS\_00246072";  
protein\_coding"; old "TCONS\_00246072";  
protein\_coding"; old "TCONS\_00257028";  
protein\_coding"; old "TCONS\_00257028";

protein\_coding"; old "TCONS\_00246116";  
protein\_coding"; old "TCONS\_00246116";  
protein\_coding"; old "TCONS\_00246283";  
protein\_coding"; old "TCONS\_00246283";  
protein\_coding"; old "TCONS\_00246290";  
protein\_coding"; old "TCONS\_00246290";  
protein\_coding"; old "TCONS\_00246305";  
protein\_coding"; old "TCONS\_00246305";  
protein\_coding"; old "TCONS\_00246305";  
protein\_coding"; old "TCONS\_00249894";  
protein\_coding"; old "TCONS\_00249894";  
protein\_coding"; old "TCONS\_00246348";  
protein\_coding"; old "TCONS\_00246350";  
protein\_coding"; old "TCONS\_00286245";  
protein\_coding"; old "TCONS\_00274051";  
protein\_coding"; old "TCONS\_00269287";  
protein\_coding"; old "TCONS\_00269287";  
protein\_coding"; old "TCONS\_00269287";  
protein\_coding"; old "TCONS\_00269288";  
protein\_coding"; old "TCONS\_00286306";  
protein\_coding"; old "TCONS\_00286306";  
protein\_coding"; old "TCONS\_00286306";



protein\_coding"; old "TCONS\_00269550";  
protein\_coding"; old "TCONS\_00269550";  
protein\_coding"; old "TCONS\_00278576";  
protein\_coding"; old "TCONS\_00278576";  
protein\_coding"; old "TCONS\_00269555";  
protein\_coding"; old "TCONS\_00269556";  
protein\_coding"; old "TCONS\_00269556";  
protein\_coding"; old "TCONS\_00274342";  
protein\_coding"; old "TCONS\_00274342";  
protein\_coding"; old "TCONS\_00274342";  
protein\_coding"; old "TCONS\_00274342";  
protein\_coding"; old "TCONS\_00278886";  
protein\_coding"; old "TCONS\_00283477";  
protein\_coding"; old "TCONS\_00283477";  
protein\_coding"; old "TCONS\_00283477";  
protein\_coding"; old "TCONS\_00269817";  
protein\_coding"; old "TCONS\_00269817";  
protein\_coding"; old "TCONS\_00269847";  
protein\_coding"; old "TCONS\_00269847";  
protein\_coding"; old "TCONS\_00269846";  
protein\_coding"; old "TCONS\_00269846";  
protein\_coding"; old "TCONS\_00269846";  
protein\_coding"; old "TCONS\_00283522";  
protein\_coding"; old "TCONS\_00283522";  
protein\_coding"; old "TCONS\_00283522";  
protein\_coding"; old "TCONS\_00283522";  
protein\_coding"; old "TCONS\_00269914";  
protein\_coding"; old "TCONS\_00269914";  
protein\_coding"; old "TCONS\_00269914";  
protein\_coding"; old "TCONS\_00269914";  
protein\_coding"; old "TCONS\_00286738";  
protein\_coding"; old "TCONS\_00286738";  
protein\_coding"; old "TCONS\_00286738";  
protein\_coding"; old "TCONS\_00286831";  
protein\_coding"; old "TCONS\_00286831";

protein\_coding"; old "TCONS\_00270128";  
protein\_coding"; old "TCONS\_00270128";  
protein\_coding"; old "TCONS\_00274832";  
protein\_coding"; old "TCONS\_00274832";  
protein\_coding"; old "TCONS\_00270294";  
protein\_coding"; old "TCONS\_00270294";  
protein\_coding"; old "TCONS\_00270297";  
protein\_coding"; old "TCONS\_00270297";  
protein\_coding"; old "TCONS\_00287036";  
protein\_coding"; old "TCONS\_00287036";  
protein\_coding"; old "TCONS\_00270480";  
protein\_coding"; old "TCONS\_00270480";  
protein\_coding"; old "TCONS\_00283943";  
protein\_coding"; old "TCONS\_00283943";  
protein\_coding"; old "TCONS\_00275134";  
protein\_coding"; old "TCONS\_00275134";  
protein\_coding"; old "TCONS\_00279871";  
protein\_coding"; old "TCONS\_00279871";  
protein\_coding"; old "TCONS\_00270899";  
protein\_coding"; old "TCONS\_00270899";  
protein\_coding"; old "TCONS\_00284219";  
protein\_coding"; old "TCONS\_00284219";  
protein\_coding"; old "TCONS\_00284219";  
protein\_coding"; old "TCONS\_00284219";  
protein\_coding"; old "TCONS\_00275529";  
protein\_coding"; old "TCONS\_00270977";  
protein\_coding"; old "TCONS\_00270977";  
protein\_coding"; old "TCONS\_00271014";  
protein\_coding"; old "TCONS\_00280150";  
protein\_coding"; old "TCONS\_00280150";  
protein\_coding"; old "TCONS\_00271018";  
protein\_coding"; old "TCONS\_00271018";

protein\_coding"; old "TCONS\_00271018";  
protein\_coding"; old "TCONS\_00275595";  
protein\_coding"; old "TCONS\_00271019";  
protein\_coding"; old "TCONS\_00271020";  
protein\_coding"; old "TCONS\_00271020";  
protein\_coding"; old "TCONS\_00271024";  
protein\_coding"; old "TCONS\_00271024";  
protein\_coding"; old "TCONS\_00271025";  
protein\_coding"; old "TCONS\_00271025";  
protein\_coding"; old "TCONS\_00287416";  
protein\_coding"; old "TCONS\_00287416";  
protein\_coding"; old "TCONS\_00287416";  
protein\_coding"; old "TCONS\_00287416";  
protein\_coding"; old "TCONS\_00280154";  
protein\_coding"; old "TCONS\_00280154";  
protein\_coding"; old "TCONS\_00280154";  
protein\_coding"; old "TCONS\_00280154";  
protein\_coding"; old "TCONS\_00271028";  
protein\_coding"; old "TCONS\_00271028";  
protein\_coding"; old "TCONS\_00271028";  
protein\_coding"; old "TCONS\_00271039";  
protein\_coding"; old "TCONS\_00271039";  
protein\_coding"; old "TCONS\_00271039";  
protein\_coding"; old "TCONS\_00284339";  
protein\_coding"; old "TCONS\_00284339";  
protein\_coding"; old "TCONS\_00271041";  
protein\_coding"; old "TCONS\_00271041";  
protein\_coding"; old "TCONS\_00271059";  
protein\_coding"; old "TCONS\_00271059";  
protein\_coding"; old "TCONS\_00271061";  
protein\_coding"; old "TCONS\_00271061";

protein\_coding"; old "TCONS\_00271061";  
protein\_coding"; old "TCONS\_00280182";  
protein\_coding"; old "TCONS\_00280182";  
protein\_coding"; old "TCONS\_00275634";  
protein\_coding"; old "TCONS\_00275634";  
protein\_coding"; old "TCONS\_00275637";  
protein\_coding"; old "TCONS\_00275637";  
protein\_coding"; old "TCONS\_00271086";  
protein\_coding"; old "TCONS\_00271086";  
protein\_coding"; old "TCONS\_00287441";  
protein\_coding"; old "TCONS\_00287441";  
protein\_coding"; old "TCONS\_00271093";  
protein\_coding"; old "TCONS\_00284366";  
protein\_coding"; old "TCONS\_00284366";  
protein\_coding"; old "TCONS\_00284366";  
protein\_coding"; old "TCONS\_00284366";  
protein\_coding"; old "TCONS\_00280201";  
protein\_coding"; old "TCONS\_00280201";  
protein\_coding"; old "TCONS\_00287446";  
protein\_coding"; old "TCONS\_00280206";  
protein\_coding"; old "TCONS\_00280206";  
protein\_coding"; old "TCONS\_00280206";  
protein\_coding"; old "TCONS\_00280206";  
protein\_coding"; old "TCONS\_00271100";  
protein\_coding"; old "TCONS\_00271100";  
protein\_coding"; old "TCONS\_00271100";  
protein\_coding"; old "TCONS\_00275663";  
protein\_coding"; old "TCONS\_00275663";  
protein\_coding"; old "TCONS\_00284381";  
protein\_coding"; old "TCONS\_00284381";  
protein\_coding"; old "TCONS\_00271122";



protein\_coding"; old "TCONS\_00271122";  
protein\_coding"; old "TCONS\_00275681";  
protein\_coding"; old "TCONS\_00275681";  
protein\_coding"; old "TCONS\_00271129";  
protein\_coding"; old "TCONS\_00271129";  
protein\_coding"; old "TCONS\_00271331";  
protein\_coding"; old "TCONS\_00271331";  
protein\_coding"; old "TCONS\_00271331";  
protein\_coding"; old "TCONS\_00271331";  
protein\_coding"; old "TCONS\_00271385";  
protein\_coding"; old "TCONS\_00271385";  
protein\_coding"; old "TCONS\_00271385";  
protein\_coding"; old "TCONS\_00275899";  
protein\_coding"; old "TCONS\_00275899";  
protein\_coding"; old "TCONS\_00275899";  
protein\_coding"; old "TCONS\_00271408";  
protein\_coding"; old "TCONS\_00271408";  
protein\_coding"; old "TCONS\_00271408";  
protein\_coding"; old "TCONS\_00271415";  
protein\_coding"; old "TCONS\_00271415";  
protein\_coding"; old "TCONS\_00271415";  
protein\_coding"; old "TCONS\_00275959";  
protein\_coding"; old "TCONS\_00275959";  
protein\_coding"; old "TCONS\_00271484";  
protein\_coding"; old "TCONS\_00271484";  
protein\_coding"; old "TCONS\_00271484";  
protein\_coding"; old "TCONS\_00271484";  
protein\_coding"; old "TCONS\_00284873";  
protein\_coding"; old "TCONS\_00284873";  
protein\_coding"; old "TCONS\_00284873";  
protein\_coding"; old "TCONS\_00284872";  
protein\_coding"; old "TCONS\_00284872";  
protein\_coding"; old "TCONS\_00271949";  
protein\_coding"; old "TCONS\_00271949";  
protein\_coding"; old "TCONS\_00281061";

protein\_coding"; old "TCONS\_00281061";  
protein\_coding"; old "TCONS\_00271958";  
protein\_coding"; old "TCONS\_00271958";  
protein\_coding"; old "TCONS\_00271958";  
protein\_coding"; old "TCONS\_00272087";  
protein\_coding"; old "TCONS\_00272087";  
protein\_coding"; old "TCONS\_00272087";  
protein\_coding"; old "TCONS\_00276514";  
protein\_coding"; old "TCONS\_00293768";  
protein\_coding"; old "TCONS\_00293768";  
protein\_coding"; old "TCONS\_00293768";  
protein\_coding"; old "TCONS\_00293768";  
protein\_coding"; old "TCONS\_00288107";  
protein\_coding"; old "TCONS\_00288107";  
protein\_coding"; old "TCONS\_00281508";  
protein\_coding"; old "TCONS\_00276632";  
protein\_coding"; old "TCONS\_00272300";  
protein\_coding"; old "TCONS\_00272300";  
protein\_coding"; old "TCONS\_00272301";



protein\_coding"; old "TCONS\_00276870";  
protein\_coding"; old "TCONS\_00272552";  
protein\_coding"; old "TCONS\_00272552";  
protein\_coding"; old "TCONS\_00272552";  
protein\_coding"; old "TCONS\_00272553";  
protein\_coding"; old "TCONS\_00272553";  
protein\_coding"; old "TCONS\_00272553";  
protein\_coding"; old "TCONS\_00272553";  
protein\_coding"; old "TCONS\_00276874";  
protein\_coding"; old "TCONS\_00291266";  
protein\_coding"; old "TCONS\_00291266";  
protein\_coding"; old "TCONS\_00281841";  
protein\_coding"; old "TCONS\_00281841";  
protein\_coding"; old "TCONS\_00281841";  
protein\_coding"; old "TCONS\_00285338";  
protein\_coding"; old "TCONS\_00276895";  
protein\_coding"; old "TCONS\_00276895";  
protein\_coding"; old "TCONS\_00276895";  
protein\_coding"; old "TCONS\_00276895";

protein\_coding"; old "TCONS\_00276895";  
protein\_coding"; old "TCONS\_00288370";  
protein\_coding"; old "TCONS\_00288369";  
protein\_coding"; old "TCONS\_00288369";  
protein\_coding"; old "TCONS\_00288369";  
protein\_coding"; old "TCONS\_00288369";  
protein\_coding"; old "TCONS\_00272583";  
protein\_coding"; old "TCONS\_00272583";  
protein\_coding"; old "TCONS\_00272583";  
protein\_coding"; old "TCONS\_00272583";  
protein\_coding"; old "TCONS\_00272585";  
protein\_coding"; old "TCONS\_00272585";  
protein\_coding"; old "TCONS\_00272587";  
protein\_coding"; old "TCONS\_00272587";  
protein\_coding"; old "TCONS\_00272587";  
protein\_coding"; old "TCONS\_00272587";  
protein\_coding"; old "TCONS\_00276905";  
protein\_coding"; old "TCONS\_00276905";  
protein\_coding"; old "TCONS\_00281887";  
protein\_coding"; old "TCONS\_00281887";  
protein\_coding"; old "TCONS\_00281887";  
protein\_coding"; old "TCONS\_00281887";  
protein\_coding"; old "TCONS\_00272596";  
protein\_coding"; old "TCONS\_00272596";  
protein\_coding"; old "TCONS\_00272596";  
protein\_coding"; old "TCONS\_00272599";  
protein\_coding"; old "TCONS\_00272599";  
protein\_coding"; old "TCONS\_00272599";  
protein\_coding"; old "TCONS\_00272599";  
protein\_coding"; old "TCONS\_00291305";  
protein\_coding"; old "TCONS\_00291305";

protein\_coding"; old "TCONS\_00291305";  
protein\_coding"; old "TCONS\_00291305";  
protein\_coding"; old "TCONS\_00291305";  
protein\_coding"; old "TCONS\_00276965";  
protein\_coding"; old "TCONS\_00285385";  
protein\_coding"; old "TCONS\_00285385";  
protein\_coding"; old "TCONS\_00285385";  
protein\_coding"; old "TCONS\_00285385";  
protein\_coding"; old "TCONS\_00288409";  
protein\_coding"; old "TCONS\_00288409";  
protein\_coding"; old "TCONS\_00288409";  
protein\_coding"; old "TCONS\_00272673";  
protein\_coding"; old "TCONS\_00272673";  
protein\_coding"; old "TCONS\_00272847";  
protein\_coding"; old "TCONS\_00272847";  
protein\_coding"; old "TCONS\_00272847";  
protein\_coding"; old "TCONS\_00285519";  
protein\_coding"; old "TCONS\_00282137";  
protein\_coding"; old "TCONS\_00282137";  
protein\_coding"; old "TCONS\_00282137";  
protein\_coding"; old "TCONS\_00272932";  
protein\_coding"; old "TCONS\_00272932";  
protein\_coding"; old "TCONS\_00272931";  
protein\_coding"; old "TCONS\_00272931";  
protein\_coding"; old "TCONS\_00272931";  
protein\_coding"; old "TCONS\_00272931";  
protein\_coding"; old "TCONS\_00288589";  
protein\_coding"; old "TCONS\_00288589";  
protein\_coding"; old "TCONS\_00288589";  
protein\_coding"; old "TCONS\_00272946";  
protein\_coding"; old "TCONS\_00272946";

protein\_coding"; old "TCONS\_00272960";  
protein\_coding"; old "TCONS\_00272960";  
protein\_coding"; old "TCONS\_00272960";  
protein\_coding"; old "TCONS\_00272965";  
protein\_coding"; old "TCONS\_00272965";  
protein\_coding"; old "TCONS\_00294258";  
protein\_coding"; old "TCONS\_00294258";  
protein\_coding"; old "TCONS\_00273062";  
protein\_coding"; old "TCONS\_00288668";  
protein\_coding"; old "TCONS\_00277310";  
protein\_coding"; old "TCONS\_00294413";  
protein\_coding"; old "TCONS\_00273307";  
protein\_coding"; old "TCONS\_00273307";  
protein\_coding"; old "TCONS\_00273307";  
protein\_coding"; old "TCONS\_00273391";

protein\_coding"; old "TCONS\_00273391";  
protein\_coding"; old "TCONS\_00277637";  
protein\_coding"; old "TCONS\_00277637";  
protein\_coding"; old "TCONS\_00273488";  
protein\_coding"; old "TCONS\_00273488";  
protein\_coding"; old "TCONS\_00291800";  
protein\_coding"; old "TCONS\_00291800";  
protein\_coding"; old "TCONS\_00273534";  
protein\_coding"; old "TCONS\_00273534";  
protein\_coding"; old "TCONS\_00288906";  
protein\_coding"; old "TCONS\_00288906";  
protein\_coding"; old "TCONS\_00288906";  
protein\_coding"; old "TCONS\_00273540";  
protein\_coding"; old "TCONS\_00273540";  
protein\_coding"; old "TCONS\_00273541";  
protein\_coding"; old "TCONS\_00273541";  
protein\_coding"; old "TCONS\_00273541";  
protein\_coding"; old "TCONS\_00288939";  
protein\_coding"; old "TCONS\_00288939";  
protein\_coding"; old "TCONS\_00310010";  
protein\_coding"; old "TCONS\_00310010";  
protein\_coding"; old "TCONS\_00310010";  
protein\_coding"; old "TCONS\_00314471";  
protein\_coding"; old "TCONS\_00310018";  
protein\_coding"; old "TCONS\_00310018";  
protein\_coding"; old "TCONS\_00299658";  
protein\_coding"; old "TCONS\_00299658";  
protein\_coding"; old "TCONS\_00299658";  
protein\_coding"; old "TCONS\_00316726";





protein\_coding"; old "TCONS\_00299889";  
protein\_coding"; old "TCONS\_00299889";  
protein\_coding"; old "TCONS\_00310160";  
protein\_coding"; old "TCONS\_00310160";  
protein\_coding"; old "TCONS\_00310160";  
protein\_coding"; old "TCONS\_00299916";  
protein\_coding"; old "TCONS\_00299916";  
protein\_coding"; old "TCONS\_00299916";  
protein\_coding"; old "TCONS\_00299916";  
protein\_coding"; old "TCONS\_00303617";  
protein\_coding"; old "TCONS\_00310177";  
protein\_coding"; old "TCONS\_00306726";  
protein\_coding"; old "TCONS\_00306726";  
protein\_coding"; old "TCONS\_00306726";  
protein\_coding"; old "TCONS\_00299930";  
protein\_coding"; old "TCONS\_00299930";  
protein\_coding"; old "TCONS\_00299930";  
protein\_coding"; old "TCONS\_00299949";  
protein\_coding"; old "TCONS\_00299950";  
protein\_coding"; old "TCONS\_00299950";  
protein\_coding"; old "TCONS\_00299950";  
protein\_coding"; old "TCONS\_00299950";  
protein\_coding"; old "TCONS\_00299950";

protein\_coding"; old "TCONS\_00299950";  
protein\_coding"; old "TCONS\_00299950";  
protein\_coding"; old "TCONS\_00299950";  
protein\_coding"; old "TCONS\_00299950";  
"protein\_coding"; old "TCONS\_00299950";  
protein\_coding"; old "TCONS\_00312642";  
protein\_coding"; old "TCONS\_00312642";  
protein\_coding"; old "TCONS\_00300265";  
protein\_coding"; old "TCONS\_00307003";  
protein\_coding"; old "TCONS\_00307003";  
protein\_coding"; old "TCONS\_00314840";  
protein\_coding"; old "TCONS\_00314840";  
protein\_coding"; old "TCONS\_00314840";  
protein\_coding"; old "TCONS\_00304057";  
protein\_coding"; old "TCONS\_00300491";  
protein\_coding"; old "TCONS\_00314967";  
protein\_coding"; old "TCONS\_00314967";  
protein\_coding"; old "TCONS\_00314967";  
protein\_coding"; old "TCONS\_00314968";



protein\_coding"; old "TCONS\_00300944";  
protein\_coding"; old "TCONS\_00300944";  
protein\_coding"; old "TCONS\_00307566";  
protein\_coding"; old "TCONS\_00300965";  
protein\_coding"; old "TCONS\_00300965";  
protein\_coding"; old "TCONS\_00301017";  
protein\_coding"; old "TCONS\_00301017";  
protein\_coding"; old "TCONS\_00301017";  
protein\_coding"; old "TCONS\_00301199";  
protein\_coding"; old "TCONS\_00301249";  
protein\_coding"; old "TCONS\_00301249";  
protein\_coding"; old "TCONS\_00301249";  
protein\_coding"; old "TCONS\_00307971";  
protein\_coding"; old "TCONS\_00310987";  
protein\_coding"; old "TCONS\_00304664";  
protein\_coding"; old "TCONS\_00304664";  
protein\_coding"; old "TCONS\_00304664";



protein\_coding"; old "TCONS\_00301813";  
protein\_coding"; old "TCONS\_00305148";  
protein\_coding"; old "TCONS\_00308501";  
protein\_coding"; old "TCONS\_00301818";  
protein\_coding"; old "TCONS\_00301818";  
protein\_coding"; old "TCONS\_00301822";  
protein\_coding"; old "TCONS\_00317981";  
protein\_coding"; old "TCONS\_00317981";  
protein\_coding"; old "TCONS\_00317981";  
protein\_coding"; old "TCONS\_00302235";  
protein\_coding"; old "TCONS\_00302235";  
protein\_coding"; old "TCONS\_00302235";  
protein\_coding"; old "TCONS\_00302242";  
protein\_coding"; old "TCONS\_00302242";  
protein\_coding"; old "TCONS\_00302306";  
protein\_coding"; old "TCONS\_00302459";  
protein\_coding"; old "TCONS\_00302459";  
protein\_coding"; old "TCONS\_00311723";  
protein\_coding"; old "TCONS\_00311723";  
protein\_coding"; old "TCONS\_00311723";  
protein\_coding"; old "TCONS\_00311723";  
protein\_coding"; old "TCONS\_00305646";





protein\_coding"; old "TCONS\_00303035";  
protein\_coding"; old "TCONS\_00303035";  
"protein\_coding"; old "TCONS\_00303035";  
"protein\_coding"; old "TCONS\_00303035";  
protein\_coding"; old "TCONS\_00318545";  
protein\_coding"; old "TCONS\_00312092";  
protein\_coding"; old "TCONS\_00312092";  
protein\_coding"; old "TCONS\_00303056";  
protein\_coding"; old "TCONS\_00303056";  
protein\_coding"; old "TCONS\_00303056";  
protein\_coding"; old "TCONS\_00303056";  
protein\_coding"; old "TCONS\_00303101";  
protein\_coding"; old "TCONS\_00303101";  
protein\_coding"; old "TCONS\_00306200";  
protein\_coding"; old "TCONS\_00327011";  
protein\_coding"; old "TCONS\_00327011";  
protein\_coding"; old "TCONS\_00327011";  
protein\_coding"; old "TCONS\_00327011";  
protein\_coding"; old "TCONS\_00327147";  
protein\_coding"; old "TCONS\_00327147";  
protein\_coding"; old "TCONS\_00322716";  
protein\_coding"; old "TCONS\_00322716";  
protein\_coding"; old "TCONS\_00322735";  
protein\_coding"; old "TCONS\_00322735";  
protein\_coding"; old "TCONS\_00322735";  
protein\_coding"; old "TCONS\_00327326";  
protein\_coding"; old "TCONS\_00327326";

protein\_coding"; old "TCONS\_00327326";  
protein\_coding"; old "TCONS\_00327326";  
protein\_coding"; old "TCONS\_00331587";  
protein\_coding"; old "TCONS\_00331587";  
protein\_coding"; old "TCONS\_00327397";  
protein\_coding"; old "TCONS\_00322973";  
protein\_coding"; old "TCONS\_00322973";  
protein\_coding"; old "TCONS\_00322973";  
protein\_coding"; old "TCONS\_00327410";  
protein\_coding"; old "TCONS\_00327410";  
protein\_coding"; old "TCONS\_00327410";  
protein\_coding"; old "TCONS\_00327410";  
protein\_coding"; old "TCONS\_00331649";  
protein\_coding"; old "TCONS\_00331649";  
protein\_coding"; old "TCONS\_00331649";  
protein\_coding"; old "TCONS\_00323100";  
protein\_coding"; old "TCONS\_00323100";  
protein\_coding"; old "TCONS\_00323100";  
protein\_coding"; old "TCONS\_00323100";  
protein\_coding"; old "TCONS\_00323241";  
protein\_coding"; old "TCONS\_00323241";  
protein\_coding"; old "TCONS\_00323240";  
protein\_coding"; old "TCONS\_00323240";  
protein\_coding"; old "TCONS\_00323240";  
protein\_coding"; old "TCONS\_00323240";  
protein\_coding"; old "TCONS\_00336619";  
protein\_coding"; old "TCONS\_00336619";  
protein\_coding"; old "TCONS\_00336619";  
protein\_coding"; old "TCONS\_00323295";  
protein\_coding"; old "TCONS\_00323295";  
protein\_coding"; old "TCONS\_00323484";  
protein\_coding"; old "TCONS\_00323484";  
protein\_coding"; old "TCONS\_00323484";  
protein\_coding"; old "TCONS\_00323484";  
protein\_coding"; old "TCONS\_00323601";







protein\_coding"; old "TCONS\_00332610";  
protein\_coding"; old "TCONS\_00332610";  
protein\_coding"; old "TCONS\_00332610";  
protein\_coding"; old "TCONS\_00323982";  
protein\_coding"; old "TCONS\_00323982";  
protein\_coding"; old "TCONS\_00323981";  
protein\_coding"; old "TCONS\_00323981";  
protein\_coding"; old "TCONS\_00323981";  
protein\_coding"; old "TCONS\_00328292";  
protein\_coding"; old "TCONS\_00328292";  
protein\_coding"; old "TCONS\_00328292";  
protein\_coding"; old "TCONS\_00324088";  
protein\_coding"; old "TCONS\_00324088";  
protein\_coding"; old "TCONS\_00324092";  
protein\_coding"; old "TCONS\_00324092";  
protein\_coding"; old "TCONS\_00324204";  
protein\_coding"; old "TCONS\_00324204";  
protein\_coding"; old "TCONS\_00324204";  
protein\_coding"; old "TCONS\_00324204";  
protein\_coding"; old "TCONS\_00324203";  
protein\_coding"; old "TCONS\_00328485";  
protein\_coding"; old "TCONS\_00328485";  
protein\_coding"; old "TCONS\_00328485";  
protein\_coding"; old "TCONS\_00324205";  
protein\_coding"; old "TCONS\_00324287";  
protein\_coding"; old "TCONS\_00324287";  
protein\_coding"; old "TCONS\_00324287";  
protein\_coding"; old "TCONS\_00324320";



protein\_coding"; old "TCONS\_00328997";  
protein\_coding"; old "TCONS\_00328997";  
protein\_coding"; old "TCONS\_00328997";  
protein\_coding"; old "TCONS\_00340317";  
protein\_coding"; old "TCONS\_00340317";  
protein\_coding"; old "TCONS\_00340317";  
protein\_coding"; old "TCONS\_00340317";  
protein\_coding"; old "TCONS\_00324796";  
protein\_coding"; old "TCONS\_00324796";  
protein\_coding"; old "TCONS\_00324796";  
protein\_coding"; old "TCONS\_00324798";  
protein\_coding"; old "TCONS\_00324798";  
protein\_coding"; old "TCONS\_00324798";  
protein\_coding"; old "TCONS\_00324798";  
protein\_coding"; old "TCONS\_00324854";  
protein\_coding"; old "TCONS\_00324854";  
protein\_coding"; old "TCONS\_00333704";  
protein\_coding"; old "TCONS\_00333704";  
protein\_coding"; old "TCONS\_00333704";  
protein\_coding"; old "TCONS\_00333704";  
protein\_coding"; old "TCONS\_00329073";  
protein\_coding"; old "TCONS\_00329073";  
protein\_coding"; old "TCONS\_00329073";  
protein\_coding"; old "TCONS\_00325023";  
protein\_coding"; old "TCONS\_00325024";  
protein\_coding"; old "TCONS\_00325056";  
protein\_coding"; old "TCONS\_00325056";  
protein\_coding"; old "TCONS\_00325056";  
protein\_coding"; old "TCONS\_00325055";





"protein\_coding"; old "TCONS\_00330090";  
protein\_coding"; old "TCONS\_00338373";  
"protein\_coding"; old "TCONS\_00338373";  
protein\_coding"; old "TCONS\_00346331";  
"protein\_coding"; old "TCONS\_00346331";  
"protein\_coding"; old "TCONS\_00346331";  
"protein\_coding"; old "TCONS\_00346331";  
protein\_coding"; old "TCONS\_00326042";  
"protein\_coding"; old "TCONS\_00326042";  
"protein\_coding"; old "TCONS\_00326042";  
protein\_coding"; old "TCONS\_00335091";

protein\_coding"; old "TCONS\_00335091";  
protein\_coding"; old "TCONS\_00343780";  
protein\_coding"; old "TCONS\_00343780";  
protein\_coding"; old "TCONS\_00343780";  
protein\_coding"; old "TCONS\_00326091";  
protein\_coding"; old "TCONS\_00326091";  
protein\_coding"; old "TCONS\_00326091";  
protein\_coding"; old "TCONS\_00326091";  
protein\_coding"; old "TCONS\_00326146";  
protein\_coding"; old "TCONS\_00341099";  
protein\_coding"; old "TCONS\_00338439";  
protein\_coding"; old "TCONS\_00338439";  
protein\_coding"; old "TCONS\_00338439";  
protein\_coding"; old "TCONS\_00330215";  
protein\_coding"; old "TCONS\_00330215";  
protein\_coding"; old "TCONS\_00330215";  
protein\_coding"; old "TCONS\_00326161";  
protein\_coding"; old "TCONS\_00326161";  
protein\_coding"; old "TCONS\_00326223";  
protein\_coding"; old "TCONS\_00326223";  
protein\_coding"; old "TCONS\_00326231";  
protein\_coding"; old "TCONS\_00326303";  
protein\_coding"; old "TCONS\_00326303";  
protein\_coding"; old "TCONS\_00326303";

protein\_coding"; old "TCONS\_00326303";  
protein\_coding"; old "TCONS\_00326303";  
protein\_coding"; old "TCONS\_00326303";  
protein\_coding"; old "TCONS\_00335483";  
protein\_coding"; old "TCONS\_00346534";  
protein\_coding"; old "TCONS\_00326467";  
protein\_coding"; old "TCONS\_00326479";  
protein\_coding"; old "TCONS\_00326479";  
protein\_coding"; old "TCONS\_00326493";  
protein\_coding"; old "TCONS\_00326629";  
protein\_coding"; old "TCONS\_00338773";  
protein\_coding"; old "TCONS\_00326688";  
protein\_coding"; old "TCONS\_00326688";  
protein\_coding"; old "TCONS\_00326688";  
protein\_coding"; old "TCONS\_00326783";  
protein\_coding"; old "TCONS\_00326783";  
protein\_coding"; old "TCONS\_00330757";  
protein\_coding"; old "TCONS\_00330757";  
protein\_coding"; old "TCONS\_00330757";  
protein\_coding"; old "TCONS\_00330756";  
protein\_coding"; old "TCONS\_00330756";

protein\_coding"; old "TCONS\_00326791";  
protein\_coding"; old "TCONS\_00326791";  
protein\_coding"; old "TCONS\_00326842";  
protein\_coding"; old "TCONS\_00326842";  
protein\_coding"; old "TCONS\_00330847";  
protein\_coding"; old "TCONS\_00330847";  
protein\_coding"; old "TCONS\_00351295";  
protein\_coding"; old "TCONS\_00397009";  
protein\_coding"; old "TCONS\_00351390";  
protein\_coding"; old "TCONS\_00351390";  
protein\_coding"; old "TCONS\_00351390";  
protein\_coding"; old "TCONS\_00351491";  
protein\_coding"; old "TCONS\_00351491";  
protein\_coding"; old "TCONS\_00351491";  
protein\_coding"; old "TCONS\_00385425";  
protein\_coding"; old "TCONS\_00385425";  
protein\_coding"; old "TCONS\_00351498";  
protein\_coding"; old "TCONS\_00351498";  
protein\_coding"; old "TCONS\_00351497";  
protein\_coding"; old "TCONS\_00351497";  
protein\_coding"; old "TCONS\_00351496";  
protein\_coding"; old "TCONS\_00351496";  
protein\_coding"; old "TCONS\_00369740";  
protein\_coding"; old "TCONS\_00369740";  
protein\_coding"; old "TCONS\_00361564";  
protein\_coding"; old "TCONS\_00361564";



protein\_coding"; old "TCONS\_00351737";  
protein\_coding"; old "TCONS\_00351737";  
protein\_coding"; old "TCONS\_00385636";  
protein\_coding"; old "TCONS\_00351829";  
protein\_coding"; old "TCONS\_00351829";  
protein\_coding"; old "TCONS\_00351828";  
protein\_coding"; old "TCONS\_00351828";  
protein\_coding"; old "TCONS\_00391546";  
protein\_coding"; old "TCONS\_00362022";  
protein\_coding"; old "TCONS\_00362022";  
protein\_coding"; old "TCONS\_00370450";  
protein\_coding"; old "TCONS\_00370450";  
protein\_coding"; old "TCONS\_00403084";  
protein\_coding"; old "TCONS\_00403084";  
protein\_coding"; old "TCONS\_00403084";  
protein\_coding"; old "TCONS\_00403084";  
protein\_coding"; old "TCONS\_00385797";  
protein\_coding"; old "TCONS\_00362070";  
protein\_coding"; old "TCONS\_00362070";  
protein\_coding"; old "TCONS\_00362258";  
protein\_coding"; old "TCONS\_00352376";  
protein\_coding"; old "TCONS\_00352376";  
protein\_coding"; old "TCONS\_00352376";  
protein\_coding"; old "TCONS\_00352376";

protein\_coding"; old "TCONS\_00352376";  
protein\_coding"; old "TCONS\_00362265";  
protein\_coding"; old "TCONS\_00362265";  
protein\_coding"; old "TCONS\_00352391";  
protein\_coding"; old "TCONS\_00379871";  
protein\_coding"; old "TCONS\_00379871";  
protein\_coding"; old "TCONS\_00352858";  
protein\_coding"; old "TCONS\_00352858";  
protein\_coding"; old "TCONS\_00352960";  
protein\_coding"; old "TCONS\_00352960";  
protein\_coding"; old "TCONS\_00371231";  
protein\_coding"; old "TCONS\_00371231";  
protein\_coding"; old "TCONS\_00371231";  
protein\_coding"; old "TCONS\_00353087";  
protein\_coding"; old "TCONS\_00353087";  
protein\_coding"; old "TCONS\_00353087";  
protein\_coding"; old "TCONS\_00353107";  
protein\_coding"; old "TCONS\_00353107";  
protein\_coding"; old "TCONS\_00353107";  
protein\_coding"; old "TCONS\_00353107";  
protein\_coding"; old "TCONS\_00353108";  
protein\_coding"; old "TCONS\_00353187";  
protein\_coding"; old "TCONS\_00353187";  
protein\_coding"; old "TCONS\_00353187";  
protein\_coding"; old "TCONS\_00353187";  
protein\_coding"; old "TCONS\_00353187";



protein\_coding"; old "TCONS\_00362945";  
protein\_coding"; old "TCONS\_00362946";  
protein\_coding"; old "TCONS\_00380230";  
protein\_coding"; old "TCONS\_00380230";  
protein\_coding"; old "TCONS\_00353319";  
protein\_coding"; old "TCONS\_00353319";  
protein\_coding"; old "TCONS\_00353319";  
protein\_coding"; old "TCONS\_00362960";  
protein\_coding"; old "TCONS\_00362960";  
protein\_coding"; old "TCONS\_00362960";  
protein\_coding"; old "TCONS\_00362960";  
protein\_coding"; old "TCONS\_00353322";  
protein\_coding"; old "TCONS\_00353322";  
protein\_coding"; old "TCONS\_00353322";  
protein\_coding"; old "TCONS\_00353540";  
protein\_coding"; old "TCONS\_00353623";  
protein\_coding"; old "TCONS\_00353716";  
protein\_coding"; old "TCONS\_00371807";  
protein\_coding"; old "TCONS\_00371807";  
protein\_coding"; old "TCONS\_00371807";  
protein\_coding"; old "TCONS\_00371807";  
protein\_coding"; old "TCONS\_00371807";

protein\_coding"; old "TCONS\_00371807";  
protein\_coding"; old "TCONS\_00371807";  
protein\_coding"; old "TCONS\_00371807";  
protein\_coding"; old "TCONS\_00371807";  
protein\_coding"; old "TCONS\_00363259";  
protein\_coding"; old "TCONS\_00353719";  
protein\_coding"; old "TCONS\_00353718";  
protein\_coding"; old "TCONS\_00380510";  
protein\_coding"; old "TCONS\_00380510";  
protein\_coding"; old "TCONS\_00380510";  
protein\_coding"; old "TCONS\_00363260";  
protein\_coding"; old "TCONS\_00363260";  
protein\_coding"; old "TCONS\_00363260";  
protein\_coding"; old "TCONS\_00371814";  
protein\_coding"; old "TCONS\_00371814";  
protein\_coding"; old "TCONS\_00353731";  
protein\_coding"; old "TCONS\_00353750";  
protein\_coding"; old "TCONS\_00353750";  
protein\_coding"; old "TCONS\_00353870";  
protein\_coding"; old "TCONS\_00386797";  
protein\_coding"; old "TCONS\_00386797";



protein\_coding"; old "TCONS\_00354571";  
protein\_coding"; old "TCONS\_00354571";  
protein\_coding"; old "TCONS\_00354571";  
protein\_coding"; old "TCONS\_00354585";  
protein\_coding"; old "TCONS\_00354585";  
protein\_coding"; old "TCONS\_00354585";  
protein\_coding"; old "TCONS\_00354585";  
protein\_coding"; old "TCONS\_00363988";  
protein\_coding"; old "TCONS\_00363988";  
protein\_coding"; old "TCONS\_00363988";  
protein\_coding"; old "TCONS\_00398825";  
protein\_coding"; old "TCONS\_00398825";  
protein\_coding"; old "TCONS\_00398825";  
protein\_coding"; old "TCONS\_00354723";  
protein\_coding"; old "TCONS\_00354723";  
protein\_coding"; old "TCONS\_00364043";  
protein\_coding"; old "TCONS\_00364043";  
protein\_coding"; old "TCONS\_00372563";  
protein\_coding"; old "TCONS\_00372563";  
protein\_coding"; old "TCONS\_00372562";  
protein\_coding"; old "TCONS\_00372562";  
protein\_coding"; old "TCONS\_00354740";  
protein\_coding"; old "TCONS\_00354739";  
protein\_coding"; old "TCONS\_00398856";  
protein\_coding"; old "TCONS\_00398856";

protein\_coding"; old "TCONS\_00398856";  
protein\_coding"; old "TCONS\_00398856";  
protein\_coding"; old "TCONS\_00398856";  
protein\_coding"; old "TCONS\_00398856";  
protein\_coding"; old "TCONS\_00398856";  
protein\_coding"; old "TCONS\_00354750";  
protein\_coding"; old "TCONS\_00354750";  
protein\_coding"; old "TCONS\_00354749";  
protein\_coding"; old "TCONS\_00354749";  
protein\_coding"; old "TCONS\_00354752";  
protein\_coding"; old "TCONS\_00354752";  
protein\_coding"; old "TCONS\_00354752";  
protein\_coding"; old "TCONS\_00354775";  
protein\_coding"; old "TCONS\_00354775";  
protein\_coding"; old "TCONS\_00354794";  
protein\_coding"; old "TCONS\_00354795";  
protein\_coding"; old "TCONS\_00381262";  
protein\_coding"; old "TCONS\_00381262";  
protein\_coding"; old "TCONS\_00381262";  
protein\_coding"; old "TCONS\_00381262";  
protein\_coding"; old "TCONS\_00354941";  
protein\_coding"; old "TCONS\_00354941";  
protein\_coding"; old "TCONS\_00355016";  
protein\_coding"; old "TCONS\_00355016";  
protein\_coding"; old "TCONS\_00372781";  
protein\_coding"; old "TCONS\_00372781";  
protein\_coding"; old "TCONS\_00364318";  
protein\_coding"; old "TCONS\_00355088";  
protein\_coding"; old "TCONS\_00355088";  
protein\_coding"; old "TCONS\_00355088";

protein\_coding"; old "TCONS\_00355088";  
protein\_coding"; old "TCONS\_00355088";  
protein\_coding"; old "TCONS\_00387482";  
protein\_coding"; old "TCONS\_00387482";  
protein\_coding"; old "TCONS\_00387482";  
protein\_coding"; old "TCONS\_00355113";  
protein\_coding"; old "TCONS\_00355113";  
protein\_coding"; old "TCONS\_00355113";  
protein\_coding"; old "TCONS\_00355113";  
protein\_coding"; old "TCONS\_00372862";  
protein\_coding"; old "TCONS\_00372862";  
protein\_coding"; old "TCONS\_00372862";  
protein\_coding"; old "TCONS\_00372862";  
protein\_coding"; old "TCONS\_00404622";  
protein\_coding"; old "TCONS\_00404622";  
protein\_coding"; old "TCONS\_00404622";  
protein\_coding"; old "TCONS\_00355184";  
protein\_coding"; old "TCONS\_00355184";  
protein\_coding"; old "TCONS\_00355227";  
protein\_coding"; old "TCONS\_00355227";  
protein\_coding"; old "TCONS\_00364434";  
protein\_coding"; old "TCONS\_00364434";  
protein\_coding"; old "TCONS\_00364439";  
protein\_coding"; old "TCONS\_00364439";  
protein\_coding"; old "TCONS\_00364439";  
protein\_coding"; old "TCONS\_00364439";  
protein\_coding"; old "TCONS\_00355236";  
protein\_coding"; old "TCONS\_00355298";  
protein\_coding"; old "TCONS\_00355298";  
protein\_coding"; old "TCONS\_00355298";  
protein\_coding"; old "TCONS\_00355299";

protein\_coding"; old "TCONS\_00355299";  
protein\_coding"; old "TCONS\_00355299";  
protein\_coding"; old "TCONS\_00355299";  
protein\_coding"; old "TCONS\_00364490";  
protein\_coding"; old "TCONS\_00364490";  
protein\_coding"; old "TCONS\_00364490";  
protein\_coding"; old "TCONS\_00355439";  
protein\_coding"; old "TCONS\_00355439";  
protein\_coding"; old "TCONS\_00355581";  
protein\_coding"; old "TCONS\_00364715";  
protein\_coding"; old "TCONS\_00364715";  
protein\_coding"; old "TCONS\_00364715";  
protein\_coding"; old "TCONS\_00364715";  
protein\_coding"; old "TCONS\_00355708";  
protein\_coding"; old "TCONS\_00355708";  
protein\_coding"; old "TCONS\_00404964";  
protein\_coding"; old "TCONS\_00404964";  
protein\_coding"; old "TCONS\_00355865";  
protein\_coding"; old "TCONS\_00355865";  
protein\_coding"; old "TCONS\_00355873";  
protein\_coding"; old "TCONS\_00355873";  
protein\_coding"; old "TCONS\_00365009";  
protein\_coding"; old "TCONS\_00356001";  
protein\_coding"; old "TCONS\_00356001";  
protein\_coding"; old "TCONS\_00356001";  
protein\_coding"; old "TCONS\_00356054";  
protein\_coding"; old "TCONS\_00356054";  
protein\_coding"; old "TCONS\_00356054";  
protein\_coding"; old "TCONS\_00356054";  
protein\_coding"; old "TCONS\_00356163";  
protein\_coding"; old "TCONS\_00373862";  
protein\_coding"; old "TCONS\_00365261";  
protein\_coding"; old "TCONS\_00365261";  
protein\_coding"; old "TCONS\_00365261";  
protein\_coding"; old "TCONS\_00365261";  
protein\_coding"; old "TCONS\_00356232";







protein\_coding"; old "TCONS\_00357072";  
"protein\_coding"; old "TCONS\_00357072";  
"protein\_coding"; old "TCONS\_00357072";  
protein\_coding"; old "TCONS\_00357071";  
"protein\_coding"; old "TCONS\_00357071";  
protein\_coding"; old "TCONS\_00394411";  
protein\_coding"; old "TCONS\_00394411";  
protein\_coding"; old "TCONS\_00405618";  
"protein\_coding"; old "TCONS\_00405618";  
protein\_coding"; old "TCONS\_00375028";  
protein\_coding"; old "TCONS\_00375028";  
protein\_coding"; old "TCONS\_00375028";  
protein\_coding"; old "TCONS\_00375035";  
protein\_coding"; old "TCONS\_00357089";  
protein\_coding"; old "TCONS\_00357089";  
protein\_coding"; old "TCONS\_00357188";



protein\_coding"; old "TCONS\_00366412";  
protein\_coding"; old "TCONS\_00366412";  
protein\_coding"; old "TCONS\_00366412";  
protein\_coding"; old "TCONS\_00357589";  
protein\_coding"; old "TCONS\_00357589";  
protein\_coding"; old "TCONS\_00382870";  
protein\_coding"; old "TCONS\_00382870";  
protein\_coding"; old "TCONS\_00382870";  
protein\_coding"; old "TCONS\_00382870";  
protein\_coding"; old "TCONS\_00366745";  
protein\_coding"; old "TCONS\_00366745";  
protein\_coding"; old "TCONS\_00358031";  
protein\_coding"; old "TCONS\_00366931";  
protein\_coding"; old "TCONS\_00358396";  
protein\_coding"; old "TCONS\_00358535";  
protein\_coding"; old "TCONS\_00358535";  
protein\_coding"; old "TCONS\_00358534";  
protein\_coding"; old "TCONS\_00358534";  
protein\_coding"; old "TCONS\_00358534";  
protein\_coding"; old "TCONS\_00358604";  
protein\_coding"; old "TCONS\_00358604";  
protein\_coding"; old "TCONS\_00358604";  
protein\_coding"; old "TCONS\_00358604";  
protein\_coding"; old "TCONS\_00367224";  
protein\_coding"; old "TCONS\_00367224";  
protein\_coding"; old "TCONS\_00358620";  
protein\_coding"; old "TCONS\_00358620";  
protein\_coding"; old "TCONS\_00376433";  
protein\_coding"; old "TCONS\_00358892";





protein\_coding"; old "TCONS\_00359329";  
protein\_coding"; old "TCONS\_00359329";  
protein\_coding"; old "TCONS\_00359329";  
protein\_coding"; old "TCONS\_00359329";  
protein\_coding"; old "TCONS\_00401451";  
protein\_coding"; old "TCONS\_00401451";  
protein\_coding"; old "TCONS\_00401451";  
protein\_coding"; old "TCONS\_00401451";  
protein\_coding"; old "TCONS\_00384026";  
protein\_coding"; old "TCONS\_00377065";  
protein\_coding"; old "TCONS\_00377065";  
protein\_coding"; old "TCONS\_00359727";  
protein\_coding"; old "TCONS\_00359727";  
protein\_coding"; old "TCONS\_00359735";  
protein\_coding"; old "TCONS\_00359735";  
protein\_coding"; old "TCONS\_00377260";  
protein\_coding"; old "TCONS\_00377260";  
protein\_coding"; old "TCONS\_00359751";  
protein\_coding"; old "TCONS\_00384265";  
protein\_coding"; old "TCONS\_00384265";  
protein\_coding"; old "TCONS\_00384265";  
protein\_coding"; old "TCONS\_00384265";  
protein\_coding"; old "TCONS\_00377270";  
protein\_coding"; old "TCONS\_00377270";  
protein\_coding"; old "TCONS\_00359755";  
protein\_coding"; old "TCONS\_00359755";  
protein\_coding"; old "TCONS\_00359755";  
protein\_coding"; old "TCONS\_00359755";  
protein\_coding"; old "TCONS\_00384266";  
protein\_coding"; old "TCONS\_00384266";  
protein\_coding"; old "TCONS\_00384266";  
protein\_coding"; old "TCONS\_00395998";

protein\_coding"; old "TCONS\_00395998";  
protein\_coding"; old "TCONS\_00359757";  
protein\_coding"; old "TCONS\_00359757";  
protein\_coding"; old "TCONS\_00359758";  
protein\_coding"; old "TCONS\_00359758";  
protein\_coding"; old "TCONS\_00359758";  
protein\_coding"; old "TCONS\_00359761";  
protein\_coding"; old "TCONS\_00359761";  
protein\_coding"; old "TCONS\_00359761";  
protein\_coding"; old "TCONS\_00368129";  
protein\_coding"; old "TCONS\_00368129";  
protein\_coding"; old "TCONS\_00401691";  
protein\_coding"; old "TCONS\_00401691";  
protein\_coding"; old "TCONS\_00401691";  
protein\_coding"; old "TCONS\_00359807";  
protein\_coding"; old "TCONS\_00359807";  
protein\_coding"; old "TCONS\_00359807";  
protein\_coding"; old "TCONS\_00359955";  
protein\_coding"; old "TCONS\_00368338";  
protein\_coding"; old "TCONS\_00368336";  
protein\_coding"; old "TCONS\_00390339";  
protein\_coding"; old "TCONS\_00390339";  
protein\_coding"; old "TCONS\_00390339";  
protein\_coding"; old "TCONS\_00390339";





protein\_coding"; old "TCONS\_00368368";  
"protein\_coding"; old "TCONS\_00368368";  
"protein\_coding"; old "TCONS\_00368368";  
"protein\_coding"; old "TCONS\_00368368";  
"protein\_coding"; old "TCONS\_00368368";  
protein\_coding"; old "TCONS\_00360110";  
protein\_coding"; old "TCONS\_00360110";  
protein\_coding"; old "TCONS\_00360110";  
protein\_coding"; old "TCONS\_00360109";  
protein\_coding"; old "TCONS\_00360109";  
protein\_coding"; old "TCONS\_00360109";  
protein\_coding"; old "TCONS\_00396231";  
protein\_coding"; old "TCONS\_00396231";  
protein\_coding"; old "TCONS\_00377611";  
protein\_coding"; old "TCONS\_00377611";  
protein\_coding"; old "TCONS\_00360344";  
protein\_coding"; old "TCONS\_00360489";  
protein\_coding"; old "TCONS\_00360489";  
protein\_coding"; old "TCONS\_00360490";  
protein\_coding"; old "TCONS\_00360490";  
protein\_coding"; old "TCONS\_00378144";  
protein\_coding"; old "TCONS\_00378144";  
protein\_coding"; old "TCONS\_00360650";  
protein\_coding"; old "TCONS\_00378306";  
protein\_coding"; old "TCONS\_00378306";  
protein\_coding"; old "TCONS\_00378424";  
protein\_coding"; old "TCONS\_00378424";  
protein\_coding"; old "TCONS\_00378424";  
protein\_coding"; old "TCONS\_00361095";  
protein\_coding"; old "TCONS\_00361095";  
protein\_coding"; old "TCONS\_00361095";

protein\_coding"; old "TCONS\_00361095";  
protein\_coding"; old "TCONS\_00361198";  
protein\_coding"; old "TCONS\_00361229";  
protein\_coding"; old "TCONS\_00361229";  
protein\_coding"; old "TCONS\_00361270";  
protein\_coding"; old "TCONS\_00412930";  
protein\_coding"; old "TCONS\_00412930";  
protein\_coding"; old "TCONS\_00412930";  
protein\_coding"; old "TCONS\_00412929";  
protein\_coding"; old "TCONS\_00412929";  
protein\_coding"; old "TCONS\_00413011";  
protein\_coding"; old "TCONS\_00413011";  
protein\_coding"; old "TCONS\_00413011";  
protein\_coding"; old "TCONS\_00413064";  
protein\_coding"; old "TCONS\_00413064";  
protein\_coding"; old "TCONS\_00428330";  
protein\_coding"; old "TCONS\_00428330";  
protein\_coding"; old "TCONS\_00421162";  
protein\_coding"; old "TCONS\_00421162";  
protein\_coding"; old "TCONS\_00421162";  
protein\_coding"; old "TCONS\_00413306";  
protein\_coding"; old "TCONS\_00413306";  
protein\_coding"; old "TCONS\_00413306";  
protein\_coding"; old "TCONS\_00413306";  
protein\_coding"; old "TCONS\_00413340";  
protein\_coding"; old "TCONS\_00413340";  
protein\_coding"; old "TCONS\_00436793";  
protein\_coding"; old "TCONS\_00436793";  
protein\_coding"; old "TCONS\_00436793";  
protein\_coding"; old "TCONS\_00413402";  
protein\_coding"; old "TCONS\_00413402";

protein\_coding"; old "TCONS\_00413402";  
protein\_coding"; old "TCONS\_00413411";  
protein\_coding"; old "TCONS\_00413411";  
protein\_coding"; old "TCONS\_00413411";  
protein\_coding"; old "TCONS\_00413428";  
protein\_coding"; old "TCONS\_00428863";  
protein\_coding"; old "TCONS\_00413663";  
protein\_coding"; old "TCONS\_00437227";  
protein\_coding"; old "TCONS\_00437227";  
protein\_coding"; old "TCONS\_00414202";  
protein\_coding"; old "TCONS\_00414202";  
protein\_coding"; old "TCONS\_00414202";  
protein\_coding"; old "TCONS\_00414202";  
protein\_coding"; old "TCONS\_00414201";  
protein\_coding"; old "TCONS\_00414201";  
protein\_coding"; old "TCONS\_00414201";  
protein\_coding"; old "TCONS\_00414201";  
protein\_coding"; old "TCONS\_00414218";  
protein\_coding"; old "TCONS\_00422141";  
protein\_coding"; old "TCONS\_00422141";  
protein\_coding"; old "TCONS\_00456369";  
protein\_coding"; old "TCONS\_00456369";  
protein\_coding"; old "TCONS\_00456369";  
protein\_coding"; old "TCONS\_00437338";  
protein\_coding"; old "TCONS\_00437338";  
protein\_coding"; old "TCONS\_00437338";  
protein\_coding"; old "TCONS\_00437338";  
protein\_coding"; old "TCONS\_00414282";  
protein\_coding"; old "TCONS\_00414299";  
protein\_coding"; old "TCONS\_00414299";  
protein\_coding"; old "TCONS\_00414341";

protein\_coding"; old "TCONS\_00414341";  
protein\_coding"; old "TCONS\_00414384";  
protein\_coding"; old "TCONS\_00422233";  
protein\_coding"; old "TCONS\_00422233";  
protein\_coding"; old "TCONS\_00422233";  
protein\_coding"; old "TCONS\_00414388";  
protein\_coding"; old "TCONS\_00414388";  
protein\_coding"; old "TCONS\_00429520";  
protein\_coding"; old "TCONS\_00429520";  
protein\_coding"; old "TCONS\_00429520";  
protein\_coding"; old "TCONS\_00429520";  
protein\_coding"; old "TCONS\_00414440";  
protein\_coding"; old "TCONS\_00414440";  
protein\_coding"; old "TCONS\_00442521";  
protein\_coding"; old "TCONS\_00442521";  
protein\_coding"; old "TCONS\_00442530";  
protein\_coding"; old "TCONS\_00422300";  
protein\_coding"; old "TCONS\_00422300";  
protein\_coding"; old "TCONS\_00422300";  
protein\_coding"; old "TCONS\_00451995";  
protein\_coding"; old "TCONS\_00451995";  
protein\_coding"; old "TCONS\_00414498";  
protein\_coding"; old "TCONS\_00414541";  
protein\_coding"; old "TCONS\_00414541";  
protein\_coding"; old "TCONS\_00442552";  
protein\_coding"; old "TCONS\_00442552";  
protein\_coding"; old "TCONS\_00442552";

protein\_coding"; old "TCONS\_00442552";  
protein\_coding"; old "TCONS\_00442552";  
protein\_coding"; old "TCONS\_00442552";  
protein\_coding"; old "TCONS\_00414579";  
protein\_coding"; old "TCONS\_00414579";  
protein\_coding"; old "TCONS\_00414580";  
protein\_coding"; old "TCONS\_00414580";  
protein\_coding"; old "TCONS\_00414605";  
protein\_coding"; old "TCONS\_00414605";  
protein\_coding"; old "TCONS\_00422400";  
protein\_coding"; old "TCONS\_00422400";  
protein\_coding"; old "TCONS\_00422400";  
protein\_coding"; old "TCONS\_00422400";  
protein\_coding"; old "TCONS\_00414616";  
protein\_coding"; old "TCONS\_00414616";  
protein\_coding"; old "TCONS\_00414616";  
protein\_coding"; old "TCONS\_00442597";  
protein\_coding"; old "TCONS\_00442597";  
protein\_coding"; old "TCONS\_00442597";  
protein\_coding"; old "TCONS\_00414622";  
protein\_coding"; old "TCONS\_00414622";  
protein\_coding"; old "TCONS\_00442598";  
protein\_coding"; old "TCONS\_00442598";  
protein\_coding"; old "TCONS\_00414625";  
protein\_coding"; old "TCONS\_00414625";  
protein\_coding"; old "TCONS\_00414625";  
protein\_coding"; old "TCONS\_00414625";  
protein\_coding"; old "TCONS\_00422414";  
protein\_coding"; old "TCONS\_00414629";  
protein\_coding"; old "TCONS\_00414629";  
protein\_coding"; old "TCONS\_00414629";

protein\_coding"; old "TCONS\_00414629";  
protein\_coding"; old "TCONS\_00414629";  
protein\_coding"; old "TCONS\_00414629";  
protein\_coding"; old "TCONS\_00422415";  
protein\_coding"; old "TCONS\_00422415";  
protein\_coding"; old "TCONS\_00422424";  
protein\_coding"; old "TCONS\_00422424";  
protein\_coding"; old "TCONS\_00429695";  
protein\_coding"; old "TCONS\_00429695";  
protein\_coding"; old "TCONS\_00422431";  
protein\_coding"; old "TCONS\_00422431";  
protein\_coding"; old "TCONS\_00422431";  
protein\_coding"; old "TCONS\_00422431";  
protein\_coding"; old "TCONS\_00442611";  
protein\_coding"; old "TCONS\_00442611";  
protein\_coding"; old "TCONS\_00442611";  
protein\_coding"; old "TCONS\_00422439";  
protein\_coding"; old "TCONS\_00422439";  
protein\_coding"; old "TCONS\_00422439";  
protein\_coding"; old "TCONS\_00422439";  
protein\_coding"; old "TCONS\_00422440";  
protein\_coding"; old "TCONS\_00422440";  
protein\_coding"; old "TCONS\_00422440";  
protein\_coding"; old "TCONS\_00422440";  
protein\_coding"; old "TCONS\_00414654";  
protein\_coding"; old "TCONS\_00414654";  
protein\_coding"; old "TCONS\_00414654";  
protein\_coding"; old "TCONS\_00414654";  
protein\_coding"; old "TCONS\_00414656";  
protein\_coding"; old "TCONS\_00414656";  
protein\_coding"; old "TCONS\_00437573";  
protein\_coding"; old "TCONS\_00437573";  
protein\_coding"; old "TCONS\_00414662";  
protein\_coding"; old "TCONS\_00414662";

protein\_coding"; old "TCONS\_00414662";  
protein\_coding"; old "TCONS\_00414662";  
protein\_coding"; old "TCONS\_00422467";  
protein\_coding"; old "TCONS\_00422467";  
protein\_coding"; old "TCONS\_00414685";  
protein\_coding"; old "TCONS\_00437590";  
protein\_coding"; old "TCONS\_00422480";  
protein\_coding"; old "TCONS\_00422480";  
protein\_coding"; old "TCONS\_00422479";  
protein\_coding"; old "TCONS\_00422479";  
protein\_coding"; old "TCONS\_00422479";  
protein\_coding"; old "TCONS\_00422479";  
protein\_coding"; old "TCONS\_00422481";  
protein\_coding"; old "TCONS\_00422481";  
protein\_coding"; old "TCONS\_00422481";  
protein\_coding"; old "TCONS\_00414699";  
protein\_coding"; old "TCONS\_00414699";  
protein\_coding"; old "TCONS\_00414699";  
protein\_coding"; old "TCONS\_00414699";  
protein\_coding"; old "TCONS\_00414715";  
protein\_coding"; old "TCONS\_00414715";  
protein\_coding"; old "TCONS\_00414715";  
protein\_coding"; old "TCONS\_00414715";  
protein\_coding"; old "TCONS\_00414715";



protein\_coding"; old "TCONS\_00414715";  
protein\_coding"; old "TCONS\_00414715";  
protein\_coding"; old "TCONS\_00414714";  
protein\_coding"; old "TCONS\_00414714";  
protein\_coding"; old "TCONS\_00414714";  
protein\_coding"; old "TCONS\_00442648";  
protein\_coding"; old "TCONS\_00414766";  
protein\_coding"; old "TCONS\_00430189";  
protein\_coding"; old "TCONS\_00430189";  
protein\_coding"; old "TCONS\_00430189";  
protein\_coding"; old "TCONS\_00415376";  
protein\_coding"; old "TCONS\_00415376";  
protein\_coding"; old "TCONS\_00430351";  
protein\_coding"; old "TCONS\_00430351";  
protein\_coding"; old "TCONS\_00430351";  
protein\_coding"; old "TCONS\_00430351";  
protein\_coding"; old "TCONS\_00415384";  
protein\_coding"; old "TCONS\_00438040";  
protein\_coding"; old "TCONS\_00438040";  
protein\_coding"; old "TCONS\_00430366";  
protein\_coding"; old "TCONS\_00415391";  
protein\_coding"; old "TCONS\_00415391";

protein\_coding"; old "TCONS\_00415391";  
protein\_coding"; old "TCONS\_00415391";  
protein\_coding"; old "TCONS\_00415391";  
protein\_coding"; old "TCONS\_00415448";  
protein\_coding"; old "TCONS\_00415448";  
protein\_coding"; old "TCONS\_00438080";  
protein\_coding"; old "TCONS\_00438080";  
protein\_coding"; old "TCONS\_00443227";  
protein\_coding"; old "TCONS\_00443227";  
protein\_coding"; old "TCONS\_00423252";  
protein\_coding"; old "TCONS\_00423252";  
protein\_coding"; old "TCONS\_00430717";  
protein\_coding"; old "TCONS\_00430717";  
protein\_coding"; old "TCONS\_00423374";  
protein\_coding"; old "TCONS\_00423374";  
protein\_coding"; old "TCONS\_00415814";  
protein\_coding"; old "TCONS\_00415814";  
protein\_coding"; old "TCONS\_00415814";  
protein\_coding"; old "TCONS\_00415813";  
protein\_coding"; old "TCONS\_00415813";  
protein\_coding"; old "TCONS\_00448042";  
protein\_coding"; old "TCONS\_00448042";  
protein\_coding"; old "TCONS\_00423614";  
protein\_coding"; old "TCONS\_00423614";  
protein\_coding"; old "TCONS\_00416028";  
protein\_coding"; old "TCONS\_00416028";  
protein\_coding"; old "TCONS\_00423708";  
protein\_coding"; old "TCONS\_00423708";  
protein\_coding"; old "TCONS\_00423708";  
protein\_coding"; old "TCONS\_00416115";  
protein\_coding"; old "TCONS\_00416115";  
protein\_coding"; old "TCONS\_00423734";  
protein\_coding"; old "TCONS\_00423734";  
protein\_coding"; old "TCONS\_00423734";  
protein\_coding"; old "TCONS\_00423734";



protein\_coding"; old "TCONS\_00416898";  
protein\_coding"; old "TCONS\_00416898";  
protein\_coding"; old "TCONS\_00416898";  
protein\_coding"; old "TCONS\_00416898";  
protein\_coding"; old "TCONS\_00438974";  
protein\_coding"; old "TCONS\_00438974";  
protein\_coding"; old "TCONS\_00416965";  
protein\_coding"; old "TCONS\_00416965";  
protein\_coding"; old "TCONS\_00416965";  
protein\_coding"; old "TCONS\_00416966";  
protein\_coding"; old "TCONS\_00416966";  
protein\_coding"; old "TCONS\_00416981";  
protein\_coding"; old "TCONS\_00416981";  
protein\_coding"; old "TCONS\_00432649";  
protein\_coding"; old "TCONS\_00432649";  
protein\_coding"; old "TCONS\_00432649";  
protein\_coding"; old "TCONS\_00417222";  
protein\_coding"; old "TCONS\_00417222";  
protein\_coding"; old "TCONS\_00417222";  
protein\_coding"; old "TCONS\_00448875";  
protein\_coding"; old "TCONS\_00448875";  
protein\_coding"; old "TCONS\_00448875";  
protein\_coding"; old "TCONS\_00448875";  
protein\_coding"; old "TCONS\_00417313";  
protein\_coding"; old "TCONS\_00444198";  
protein\_coding"; old "TCONS\_00444198";  
protein\_coding"; old "TCONS\_00417668";  
protein\_coding"; old "TCONS\_00417668";  
protein\_coding"; old "TCONS\_00425144";  
protein\_coding"; old "TCONS\_00425144";  
protein\_coding"; old "TCONS\_00425144";

protein\_coding"; old "TCONS\_00425144";  
protein\_coding"; old "TCONS\_00425144";  
protein\_coding"; old "TCONS\_00425144";  
protein\_coding"; old "TCONS\_00425144";  
protein\_coding"; old "TCONS\_00417898";  
protein\_coding"; old "TCONS\_00417898";  
protein\_coding"; old "TCONS\_00439817";  
protein\_coding"; old "TCONS\_00439817";  
protein\_coding"; old "TCONS\_00418172";  
protein\_coding"; old "TCONS\_00425512";  
protein\_coding"; old "TCONS\_00418173";  
protein\_coding"; old "TCONS\_00433666";  
protein\_coding"; old "TCONS\_00433666";  
protein\_coding"; old "TCONS\_00418185";  
protein\_coding"; old "TCONS\_00444695";  
protein\_coding"; old "TCONS\_00444695";  
protein\_coding"; old "TCONS\_00418197";  
protein\_coding"; old "TCONS\_00418197";

protein\_coding"; old "TCONS\_00418197";  
protein\_coding"; old "TCONS\_00418200";  
protein\_coding"; old "TCONS\_00418200";  
protein\_coding"; old "TCONS\_00439850";  
protein\_coding"; old "TCONS\_00439850";  
protein\_coding"; old "TCONS\_00439850";  
protein\_coding"; old "TCONS\_00418202";  
protein\_coding"; old "TCONS\_00418202";  
protein\_coding"; old "TCONS\_00418218";  
protein\_coding"; old "TCONS\_00418223";  
protein\_coding"; old "TCONS\_00418223";  
protein\_coding"; old "TCONS\_00418223";  
protein\_coding"; old "TCONS\_00425556";  
protein\_coding"; old "TCONS\_00425556";  
protein\_coding"; old "TCONS\_00433712";  
protein\_coding"; old "TCONS\_00433712";  
protein\_coding"; old "TCONS\_00433712";  
protein\_coding"; old "TCONS\_00433722";  
protein\_coding"; old "TCONS\_00433722";  
protein\_coding"; old "TCONS\_00418267";  
protein\_coding"; old "TCONS\_00418267";  
protein\_coding"; old "TCONS\_00418267";  
protein\_coding"; old "TCONS\_00418272";  
protein\_coding"; old "TCONS\_00418272";  
protein\_coding"; old "TCONS\_00418272";  
protein\_coding"; old "TCONS\_00439909";  
protein\_coding"; old "TCONS\_00439909";  
protein\_coding"; old "TCONS\_00439909";  
protein\_coding"; old "TCONS\_00444761";  
protein\_coding"; old "TCONS\_00444761";  
protein\_coding"; old "TCONS\_00444761";  
protein\_coding"; old "TCONS\_00444761";  
protein\_coding"; old "TCONS\_00433765";  
protein\_coding"; old "TCONS\_00433765";  
protein\_coding"; old "TCONS\_00418287";

protein\_coding"; old "TCONS\_00418287";  
protein\_coding"; old "TCONS\_00418287";  
protein\_coding"; old "TCONS\_00439913";  
protein\_coding"; old "TCONS\_00418290";  
protein\_coding"; old "TCONS\_00418290";  
protein\_coding"; old "TCONS\_00418290";  
protein\_coding"; old "TCONS\_00418290";  
protein\_coding"; old "TCONS\_00418318";  
protein\_coding"; old "TCONS\_00418318";  
protein\_coding"; old "TCONS\_00418319";  
protein\_coding"; old "TCONS\_00418319";  
protein\_coding"; old "TCONS\_00418335";  
protein\_coding"; old "TCONS\_00439940";  
protein\_coding"; old "TCONS\_00425653";  
protein\_coding"; old "TCONS\_00439958";  
protein\_coding"; old "TCONS\_00439958";  
protein\_coding"; old "TCONS\_00439958";  
protein\_coding"; old "TCONS\_00439958";







protein\_coding"; old "TCONS\_00433876";  
protein\_coding"; old "TCONS\_00418438";  
protein\_coding"; old "TCONS\_00433894";  
protein\_coding"; old "TCONS\_00433894";  
protein\_coding"; old "TCONS\_00433894";  
protein\_coding"; old "TCONS\_00418477";  
protein\_coding"; old "TCONS\_00440011";  
protein\_coding"; old "TCONS\_00425791";  
protein\_coding"; old "TCONS\_00425791";  
protein\_coding"; old "TCONS\_00425791";  
protein\_coding"; old "TCONS\_00425796";  
protein\_coding"; old "TCONS\_00440030";  
protein\_coding"; old "TCONS\_00440030";

protein\_coding"; old "TCONS\_00440030";  
protein\_coding"; old "TCONS\_00425816";  
protein\_coding"; old "TCONS\_00425816";  
protein\_coding"; old "TCONS\_00425816";  
protein\_coding"; old "TCONS\_00425816";  
protein\_coding"; old "TCONS\_00433952";  
protein\_coding"; old "TCONS\_00418529";  
protein\_coding"; old "TCONS\_00418531";  
protein\_coding"; old "TCONS\_00418531";  
protein\_coding"; old "TCONS\_00418539";  
protein\_coding"; old "TCONS\_00418539";  
protein\_coding"; old "TCONS\_00418539";  
protein\_coding"; old "TCONS\_00418552";  
protein\_coding"; old "TCONS\_00418552";  
protein\_coding"; old "TCONS\_00425831";  
protein\_coding"; old "TCONS\_00425831";  
protein\_coding"; old "TCONS\_00418557";  
protein\_coding"; old "TCONS\_00418557";  
protein\_coding"; old "TCONS\_00418557";  
protein\_coding"; old "TCONS\_00418557";  
protein\_coding"; old "TCONS\_00440052";  
protein\_coding"; old "TCONS\_00440052";  
protein\_coding"; old "TCONS\_00440052";  
protein\_coding"; old "TCONS\_00440052";  
protein\_coding"; old "TCONS\_00440051";  
protein\_coding"; old "TCONS\_00440051";

protein\_coding"; old "TCONS\_00440051";  
protein\_coding"; old "TCONS\_00444912";  
protein\_coding"; old "TCONS\_00444912";  
protein\_coding"; old "TCONS\_00425832";  
protein\_coding"; old "TCONS\_00433969";  
protein\_coding"; old "TCONS\_00425833";  
protein\_coding"; old "TCONS\_00425833";  
protein\_coding"; old "TCONS\_00425833";  
protein\_coding"; old "TCONS\_00425833";  
protein\_coding"; old "TCONS\_00418561";  
protein\_coding"; old "TCONS\_00425847";  
protein\_coding"; old "TCONS\_00425847";  
protein\_coding"; old "TCONS\_00425847";  
protein\_coding"; old "TCONS\_00418596";

protein\_coding"; old "TCONS\_00418596";  
protein\_coding"; old "TCONS\_00418596";  
protein\_coding"; old "TCONS\_00454414";  
"protein\_coding"; old "TCONS\_00454414";  
protein\_coding"; old "TCONS\_00418599";  
protein\_coding"; old "TCONS\_00418599";  
protein\_coding"; old "TCONS\_00418599";  
protein\_coding"; old "TCONS\_00418599";  
protein\_coding"; old "TCONS\_00418602";  
protein\_coding"; old "TCONS\_00418602";  
protein\_coding"; old "TCONS\_00418602";  
protein\_coding"; old "TCONS\_00418612";  
protein\_coding"; old "TCONS\_00418612";  
protein\_coding"; old "TCONS\_00418618";  
protein\_coding"; old "TCONS\_00418694";  
protein\_coding"; old "TCONS\_00418694";  
protein\_coding"; old "TCONS\_00434099";  
protein\_coding"; old "TCONS\_00434099";  
protein\_coding"; old "TCONS\_00418811";  
protein\_coding"; old "TCONS\_00418811";  
protein\_coding"; old "TCONS\_00418811";  
protein\_coding"; old "TCONS\_00418811";  
protein\_coding"; old "TCONS\_00426061";  
protein\_coding"; old "TCONS\_00426061";

protein\_coding"; old "TCONS\_00434255";  
protein\_coding"; old "TCONS\_00434255";  
protein\_coding"; old "TCONS\_00434255";  
protein\_coding"; old "TCONS\_00426091";  
protein\_coding"; old "TCONS\_00426091";  
protein\_coding"; old "TCONS\_00426100";  
protein\_coding"; old "TCONS\_00426100";  
protein\_coding"; old "TCONS\_00426100";  
protein\_coding"; old "TCONS\_00418892";  
protein\_coding"; old "TCONS\_00418892";  
protein\_coding"; old "TCONS\_00418892";  
protein\_coding"; old "TCONS\_00426354";  
protein\_coding"; old "TCONS\_00426354";  
protein\_coding"; old "TCONS\_00426354";  
protein\_coding"; old "TCONS\_00426354";  
protein\_coding"; old "TCONS\_00440460";  
protein\_coding"; old "TCONS\_00440459";  
protein\_coding"; old "TCONS\_00440461";  
protein\_coding"; old "TCONS\_00419182";  
protein\_coding"; old "TCONS\_00419182";  
protein\_coding"; old "TCONS\_00419182";  
protein\_coding"; old "TCONS\_00419182";







"protein\_coding"; old "TCONS\_00445291";  
"protein\_coding"; old "TCONS\_00445291";  
protein\_coding"; old "TCONS\_00450075";  
"protein\_coding"; old "TCONS\_00450075";  
"protein\_coding"; old "TCONS\_00450075";  
"protein\_coding"; old "TCONS\_00450075";  
protein\_coding"; old "TCONS\_00434606";  
protein\_coding"; old "TCONS\_00434606";  
protein\_coding"; old "TCONS\_00434606";  
protein\_coding"; old "TCONS\_00434606";  
protein\_coding"; old "TCONS\_00434610";  
protein\_coding"; old "TCONS\_00434610";  
protein\_coding"; old "TCONS\_00419361";  
protein\_coding"; old "TCONS\_00419361";  
protein\_coding"; old "TCONS\_00419373";  
protein\_coding"; old "TCONS\_00419373";  
protein\_coding"; old "TCONS\_00419418";  
protein\_coding"; old "TCONS\_00419418";  
protein\_coding"; old "TCONS\_00419418";  
protein\_coding"; old "TCONS\_00419418";  
protein\_coding"; old "TCONS\_00419428";  
protein\_coding"; old "TCONS\_00419428";  
protein\_coding"; old "TCONS\_00419428";  
protein\_coding"; old "TCONS\_00419428";  
protein\_coding"; old "TCONS\_00445527";  
protein\_coding"; old "TCONS\_00445527";  
protein\_coding"; old "TCONS\_00445527";  
protein\_coding"; old "TCONS\_00445527";

protein\_coding"; old "TCONS\_00445527";  
protein\_coding"; old "TCONS\_00434971";  
protein\_coding"; old "TCONS\_00434971";  
protein\_coding"; old "TCONS\_00434971";  
protein\_coding"; old "TCONS\_00434971";  
protein\_coding"; old "TCONS\_00419617";  
protein\_coding"; old "TCONS\_00419618";  
protein\_coding"; old "TCONS\_00419618";  
protein\_coding"; old "TCONS\_00419618";  
protein\_coding"; old "TCONS\_00419618";  
protein\_coding"; old "TCONS\_00419748";  
protein\_coding"; old "TCONS\_00419748";  
protein\_coding"; old "TCONS\_00419748";  
protein\_coding"; old "TCONS\_00419748";  
protein\_coding"; old "TCONS\_00419796";  
protein\_coding"; old "TCONS\_00419796";  
protein\_coding"; old "TCONS\_00419796";  
protein\_coding"; old "TCONS\_00419796";  
protein\_coding"; old "TCONS\_00440844";  
protein\_coding"; old "TCONS\_00440844";  
protein\_coding"; old "TCONS\_00419825";  
protein\_coding"; old "TCONS\_00419825";  
protein\_coding"; old "TCONS\_00419825";  
protein\_coding"; old "TCONS\_00426922";  
protein\_coding"; old "TCONS\_00426922";  
protein\_coding"; old "TCONS\_00419851";  
protein\_coding"; old "TCONS\_00419851";  
protein\_coding"; old "TCONS\_00420084";  
protein\_coding"; old "TCONS\_00420084";  
protein\_coding"; old "TCONS\_00435562";  
protein\_coding"; old "TCONS\_00435562";



protein\_coding"; old "TCONS\_00459477";  
protein\_coding"; old "TCONS\_00420278";  
protein\_coding"; old "TCONS\_00441212";  
protein\_coding"; old "TCONS\_00441212";  
protein\_coding"; old "TCONS\_00441212";  
protein\_coding"; old "TCONS\_00441212";  
protein\_coding"; old "TCONS\_00435817";  
protein\_coding"; old "TCONS\_00441305";  
protein\_coding"; old "TCONS\_00441305";  
protein\_coding"; old "TCONS\_00450935";  
protein\_coding"; old "TCONS\_00450935";  
protein\_coding"; old "TCONS\_00450935";  
protein\_coding"; old "TCONS\_00420772";  
protein\_coding"; old "TCONS\_00420772";  
protein\_coding"; old "TCONS\_00420772";  
protein\_coding"; old "TCONS\_00420850";  
protein\_coding"; old "TCONS\_00420850";  
protein\_coding"; old "TCONS\_00463973";  
protein\_coding"; old "TCONS\_00463973";  
protein\_coding"; old "TCONS\_00463973";  
protein\_coding"; old "TCONS\_00469193";  
protein\_coding"; old "TCONS\_00469193";  
protein\_coding"; old "TCONS\_00469193";  
protein\_coding"; old "TCONS\_00464090";  
protein\_coding"; old "TCONS\_00464090";  
protein\_coding"; old "TCONS\_00464290";

protein\_coding"; old "TCONS\_00464290";  
protein\_coding"; old "TCONS\_00464290";  
protein\_coding"; old "TCONS\_00464299";  
protein\_coding"; old "TCONS\_00464299";  
protein\_coding"; old "TCONS\_00464298";  
protein\_coding"; old "TCONS\_00464298";  
protein\_coding"; old "TCONS\_00469438";  
protein\_coding"; old "TCONS\_00473935";  
protein\_coding"; old "TCONS\_00464450";  
protein\_coding"; old "TCONS\_00464450";  
protein\_coding"; old "TCONS\_00464450";  
protein\_coding"; old "TCONS\_00485568";  
protein\_coding"; old "TCONS\_00485568";  
protein\_coding"; old "TCONS\_00473985";  
protein\_coding"; old "TCONS\_00473985";  
protein\_coding"; old "TCONS\_00474007";  
protein\_coding"; old "TCONS\_00474007";  
protein\_coding"; old "TCONS\_00474043";  
protein\_coding"; old "TCONS\_00474043";  
protein\_coding"; old "TCONS\_00474043";  
protein\_coding"; old "TCONS\_00474043";  
protein\_coding"; old "TCONS\_00464520";  
protein\_coding"; old "TCONS\_00464520";  
protein\_coding"; old "TCONS\_00464520";  
protein\_coding"; old "TCONS\_00464520";  
protein\_coding"; old "TCONS\_00464520";

protein\_coding"; old "TCONS\_00464520";  
protein\_coding"; old "TCONS\_00464519";  
protein\_coding"; old "TCONS\_00469595";  
protein\_coding"; old "TCONS\_00488834";  
protein\_coding"; old "TCONS\_00469593";  
protein\_coding"; old "TCONS\_00469593";  
protein\_coding"; old "TCONS\_00469593";  
protein\_coding"; old "TCONS\_00474045";  
protein\_coding"; old "TCONS\_00474229";  
protein\_coding"; old "TCONS\_00469749";  
protein\_coding"; old "TCONS\_00469749";

protein\_coding"; old "TCONS\_00469749";  
protein\_coding"; old "TCONS\_00469749";  
protein\_coding"; old "TCONS\_00469749";  
protein\_coding"; old "TCONS\_00464723";  
protein\_coding"; old "TCONS\_00464723";  
protein\_coding"; old "TCONS\_00474231";  
protein\_coding"; old "TCONS\_00474231";  
protein\_coding"; old "TCONS\_00474326";  
protein\_coding"; old "TCONS\_00474373";  
protein\_coding"; old "TCONS\_00464851";  
protein\_coding"; old "TCONS\_00474375";  
protein\_coding"; old "TCONS\_00474375";  
protein\_coding"; old "TCONS\_00474375";  
protein\_coding"; old "TCONS\_00479541";  
protein\_coding"; old "TCONS\_00479541";  
protein\_coding"; old "TCONS\_00474553";  
protein\_coding"; old "TCONS\_00474552";  
protein\_coding"; old "TCONS\_00474552";  
protein\_coding"; old "TCONS\_00474552";

protein\_coding"; old "TCONS\_00474552";  
protein\_coding"; old "TCONS\_00474552";  
protein\_coding"; old "TCONS\_00479571";  
protein\_coding"; old "TCONS\_00479571";  
protein\_coding"; old "TCONS\_00470049";  
protein\_coding"; old "TCONS\_00470049";  
protein\_coding"; old "TCONS\_00470049";  
protein\_coding"; old "TCONS\_00465135";  
protein\_coding"; old "TCONS\_00465135";  
protein\_coding"; old "TCONS\_00465135";  
protein\_coding"; old "TCONS\_00482938";  
protein\_coding"; old "TCONS\_00465212";  
protein\_coding"; old "TCONS\_00465212";  
protein\_coding"; old "TCONS\_00465260";  
protein\_coding"; old "TCONS\_00465260";  
protein\_coding"; old "TCONS\_00465293";  
protein\_coding"; old "TCONS\_00465293";  
protein\_coding"; old "TCONS\_00465294";  
protein\_coding"; old "TCONS\_00465294";  
protein\_coding"; old "TCONS\_00465294";  
protein\_coding"; old "TCONS\_00465324";  
protein\_coding"; old "TCONS\_00465324";  
protein\_coding"; old "TCONS\_00465481";  
protein\_coding"; old "TCONS\_00465481";  
protein\_coding"; old "TCONS\_00465521";  
protein\_coding"; old "TCONS\_00465521";  
protein\_coding"; old "TCONS\_00465521";  
protein\_coding"; old "TCONS\_00475125";  
protein\_coding"; old "TCONS\_00465605";  
protein\_coding"; old "TCONS\_00465605";



protein\_coding"; old "TCONS\_00465605";  
protein\_coding"; old "TCONS\_00465605";  
protein\_coding"; old "TCONS\_00465605";  
protein\_coding"; old "TCONS\_00465605";  
protein\_coding"; old "TCONS\_00465605";  
protein\_coding"; old "TCONS\_00465605";  
protein\_coding"; old "TCONS\_00465605";  
protein\_coding"; old "TCONS\_00465604";  
protein\_coding"; old "TCONS\_00465614";  
protein\_coding"; old "TCONS\_00465614";  
protein\_coding"; old "TCONS\_00465614";  
protein\_coding"; old "TCONS\_00465680";  
protein\_coding"; old "TCONS\_00465680";  
protein\_coding"; old "TCONS\_00479985";  
protein\_coding"; old "TCONS\_00479985";  
protein\_coding"; old "TCONS\_00479985";  
protein\_coding"; old "TCONS\_00465698";  
protein\_coding"; old "TCONS\_00465698";  
protein\_coding"; old "TCONS\_00486347";  
protein\_coding"; old "TCONS\_00486347";  
protein\_coding"; old "TCONS\_00486347";  
protein\_coding"; old "TCONS\_00465704";  
protein\_coding"; old "TCONS\_00465704";  
protein\_coding"; old "TCONS\_00465704";  
protein\_coding"; old "TCONS\_00492581";  
protein\_coding"; old "TCONS\_00492581";  
protein\_coding"; old "TCONS\_00492581";

protein\_coding"; old "TCONS\_00492581";  
protein\_coding"; old "TCONS\_00492581";  
protein\_coding"; old "TCONS\_00465818";  
protein\_coding"; old "TCONS\_00465818";  
protein\_coding"; old "TCONS\_00465818";  
protein\_coding"; old "TCONS\_00465818";  
protein\_coding"; old "TCONS\_00465841";  
protein\_coding"; old "TCONS\_00465841";  
protein\_coding"; old "TCONS\_00480142";  
protein\_coding"; old "TCONS\_00475553";  
protein\_coding"; old "TCONS\_00475553";  
protein\_coding"; old "TCONS\_00475553";  
protein\_coding"; old "TCONS\_00466270";  
protein\_coding"; old "TCONS\_00466737";  
protein\_coding"; old "TCONS\_00466737";  
protein\_coding"; old "TCONS\_00466874";  
protein\_coding"; old "TCONS\_00466874";  
protein\_coding"; old "TCONS\_00480810";  
protein\_coding"; old "TCONS\_00480810";  
protein\_coding"; old "TCONS\_00480810";  
protein\_coding"; old "TCONS\_00480810";  
protein\_coding"; old "TCONS\_00466982";  
protein\_coding"; old "TCONS\_00467013";  
protein\_coding"; old "TCONS\_00467013";  
protein\_coding"; old "TCONS\_00480954";  
protein\_coding"; old "TCONS\_00480954";  
protein\_coding"; old "TCONS\_00480954";  
protein\_coding"; old "TCONS\_00467178";  
protein\_coding"; old "TCONS\_00467178";

protein\_coding"; old "TCONS\_00467178";  
protein\_coding"; old "TCONS\_00471890";  
protein\_coding"; old "TCONS\_00467342";  
protein\_coding"; old "TCONS\_00467342";  
protein\_coding"; old "TCONS\_00481180";  
protein\_coding"; old "TCONS\_00481180";  
protein\_coding"; old "TCONS\_00484314";  
protein\_coding"; old "TCONS\_00484314";  
protein\_coding"; old "TCONS\_00472158";  
protein\_coding"; old "TCONS\_00467521";  
protein\_coding"; old "TCONS\_00472305";  
protein\_coding"; old "TCONS\_00472305";  
protein\_coding"; old "TCONS\_00472305";  
protein\_coding"; old "TCONS\_00490782";  
protein\_coding"; old "TCONS\_00490782";  
protein\_coding"; old "TCONS\_00490782";  
protein\_coding"; old "TCONS\_00490782";

protein\_coding"; old "TCONS\_00490782";  
protein\_coding"; old "TCONS\_00490782";  
protein\_coding"; old "TCONS\_00472334";  
protein\_coding"; old "TCONS\_00467702";  
protein\_coding"; old "TCONS\_00477479";  
protein\_coding"; old "TCONS\_00477479";  
protein\_coding"; old "TCONS\_00467729";  
protein\_coding"; old "TCONS\_00467729";  
protein\_coding"; old "TCONS\_00467745";  
protein\_coding"; old "TCONS\_00467745";  
protein\_coding"; old "TCONS\_00481478";  
protein\_coding"; old "TCONS\_00481478";  
protein\_coding"; old "TCONS\_00467896";  
protein\_coding"; old "TCONS\_00467896";  
protein\_coding"; old "TCONS\_00467899";  
protein\_coding"; old "TCONS\_00467899";  
protein\_coding"; old "TCONS\_00467899";  
protein\_coding"; old "TCONS\_00467899";  
protein\_coding"; old "TCONS\_00472514";  
protein\_coding"; old "TCONS\_00472514";  
protein\_coding"; old "TCONS\_00472514";  
protein\_coding"; old "TCONS\_00467945";  
protein\_coding"; old "TCONS\_00472561";  
protein\_coding"; old "TCONS\_00472561";  
protein\_coding"; old "TCONS\_00472561";  
protein\_coding"; old "TCONS\_00472561";

protein\_coding"; old "TCONS\_00472561";  
protein\_coding"; old "TCONS\_00472561";  
protein\_coding"; old "TCONS\_00472561";  
protein\_coding"; old "TCONS\_00472561";  
protein\_coding"; old "TCONS\_00467972";  
protein\_coding"; old "TCONS\_00487800";  
protein\_coding"; old "TCONS\_00467993";  
protein\_coding"; old "TCONS\_00467993";  
protein\_coding"; old "TCONS\_00481541";  
protein\_coding"; old "TCONS\_00487829";  
protein\_coding"; old "TCONS\_00487829";  
protein\_coding"; old "TCONS\_00487829";  
protein\_coding"; old "TCONS\_00487829";  
protein\_coding"; old "TCONS\_00468004";  
protein\_coding"; old "TCONS\_00468004";  
protein\_coding"; old "TCONS\_00468004";  
protein\_coding"; old "TCONS\_00468004";  
protein\_coding"; old "TCONS\_00481545";  
protein\_coding"; old "TCONS\_00481545";  
protein\_coding"; old "TCONS\_00472597";  
protein\_coding"; old "TCONS\_00472597";  
protein\_coding"; old "TCONS\_00472598";  
protein\_coding"; old "TCONS\_00472598";  
protein\_coding"; old "TCONS\_00472598";

protein\_coding"; old "TCONS\_00472598";  
protein\_coding"; old "TCONS\_00477741";  
protein\_coding"; old "TCONS\_00468022";  
protein\_coding"; old "TCONS\_00468022";  
protein\_coding"; old "TCONS\_00468026";  
protein\_coding"; old "TCONS\_00468026";  
protein\_coding"; old "TCONS\_00487859";  
protein\_coding"; old "TCONS\_00477799";  
protein\_coding"; old "TCONS\_00477799";  
protein\_coding"; old "TCONS\_00468099";  
protein\_coding"; old "TCONS\_00468099";  
protein\_coding"; old "TCONS\_00468103";  
protein\_coding"; old "TCONS\_00468103";  
protein\_coding"; old "TCONS\_00472694";  
protein\_coding"; old "TCONS\_00477855";  
protein\_coding"; old "TCONS\_00477855";  
protein\_coding"; old "TCONS\_00477855";  
protein\_coding"; old "TCONS\_00477855";



protein\_coding"; old "TCONS\_00481646";  
protein\_coding"; old "TCONS\_00481646";  
protein\_coding"; old "TCONS\_00468174";  
protein\_coding"; old "TCONS\_00487923";  
protein\_coding"; old "TCONS\_00477884";  
protein\_coding"; old "TCONS\_00477884";  
protein\_coding"; old "TCONS\_00468250";  
protein\_coding"; old "TCONS\_00468250";  
protein\_coding"; old "TCONS\_00468250";  
protein\_coding"; old "TCONS\_00491089";  
protein\_coding"; old "TCONS\_00491089";  
protein\_coding"; old "TCONS\_00472801";  
protein\_coding"; old "TCONS\_00472801";  
protein\_coding"; old "TCONS\_00472801";  
protein\_coding"; old "TCONS\_00468512";  
protein\_coding"; old "TCONS\_00468512";  
protein\_coding"; old "TCONS\_00468512";  
protein\_coding"; old "TCONS\_00468512";  
protein\_coding"; old "TCONS\_00468513";  
protein\_coding"; old "TCONS\_00468513";  
protein\_coding"; old "TCONS\_00468513";  
protein\_coding"; old "TCONS\_00478314";





protein\_coding"; old "TCONS\_00485226";  
"protein\_coding"; old "TCONS\_00485226";  
"protein\_coding"; old "TCONS\_00485226";  
"protein\_coding"; old "TCONS\_00485226";  
protein\_coding"; old "TCONS\_00482192";  
protein\_coding"; old "TCONS\_00469007";  
protein\_coding"; old "TCONS\_00469007";  
protein\_coding"; old "TCONS\_00469007";  
protein\_coding"; old "TCONS\_00496948";  
protein\_coding"; old "TCONS\_00496948";  
protein\_coding"; old "TCONS\_00496948";  
protein\_coding"; old "TCONS\_00503294";  
protein\_coding"; old "TCONS\_00503294";  
protein\_coding"; old "TCONS\_00503294";  
protein\_coding"; old "TCONS\_00497045";  
protein\_coding"; old "TCONS\_00497044";  
protein\_coding"; old "TCONS\_00497044";  
protein\_coding"; old "TCONS\_00497044";

protein\_coding"; old "TCONS\_00497044";  
protein\_coding"; old "TCONS\_00497077";  
protein\_coding"; old "TCONS\_00497077";  
protein\_coding"; old "TCONS\_00526223";  
protein\_coding"; old "TCONS\_00526223";  
protein\_coding"; old "TCONS\_00497447";  
protein\_coding"; old "TCONS\_00497573";  
protein\_coding"; old "TCONS\_00497573";  
protein\_coding"; old "TCONS\_00497763";  
protein\_coding"; old "TCONS\_00509273";  
protein\_coding"; old "TCONS\_00509273";  
protein\_coding"; old "TCONS\_00498016";  
protein\_coding"; old "TCONS\_00498016";  
protein\_coding"; old "TCONS\_00498016";  
protein\_coding"; old "TCONS\_00498015";  
protein\_coding"; old "TCONS\_00498215";  
protein\_coding"; old "TCONS\_00498215";  
protein\_coding"; old "TCONS\_00523118";  
protein\_coding"; old "TCONS\_00523118";  
protein\_coding"; old "TCONS\_00523118";  
protein\_coding"; old "TCONS\_00523118";

protein\_coding"; old "TCONS\_00498318";  
protein\_coding"; old "TCONS\_00504369";  
protein\_coding"; old "TCONS\_00504369";  
protein\_coding"; old "TCONS\_00504369";  
protein\_coding"; old "TCONS\_00504369";  
protein\_coding"; old "TCONS\_00519447";  
protein\_coding"; old "TCONS\_00519447";  
protein\_coding"; old "TCONS\_00526774";  
protein\_coding"; old "TCONS\_00526774";  
protein\_coding"; old "TCONS\_00498727";  
protein\_coding"; old "TCONS\_00498727";  
protein\_coding"; old "TCONS\_00498727";  
protein\_coding"; old "TCONS\_00498726";  
protein\_coding"; old "TCONS\_00498726";  
protein\_coding"; old "TCONS\_00498781";  
protein\_coding"; old "TCONS\_00498781";  
protein\_coding"; old "TCONS\_00504804";  
protein\_coding"; old "TCONS\_00504804";  
protein\_coding"; old "TCONS\_00498836";  
protein\_coding"; old "TCONS\_00498836";  
protein\_coding"; old "TCONS\_00498836";  
protein\_coding"; old "TCONS\_00498867";  
protein\_coding"; old "TCONS\_00498867";  
protein\_coding"; old "TCONS\_00504831";  
protein\_coding"; old "TCONS\_00504831";  
protein\_coding"; old "TCONS\_00498870";  
protein\_coding"; old "TCONS\_00498870";  
protein\_coding"; old "TCONS\_00504832";  
protein\_coding"; old "TCONS\_00504832";  
protein\_coding"; old "TCONS\_00498878";  
protein\_coding"; old "TCONS\_00498878";

protein\_coding"; old "TCONS\_00498878";  
protein\_coding"; old "TCONS\_00515875";  
protein\_coding"; old "TCONS\_00498902";  
protein\_coding"; old "TCONS\_00498902";  
protein\_coding"; old "TCONS\_00498902";  
protein\_coding"; old "TCONS\_00498902";  
protein\_coding"; old "TCONS\_00498953";  
protein\_coding"; old "TCONS\_00498953";  
protein\_coding"; old "TCONS\_00504900";  
protein\_coding"; old "TCONS\_00504900";  
protein\_coding"; old "TCONS\_00498951";  
protein\_coding"; old "TCONS\_00498951";  
protein\_coding"; old "TCONS\_00499065";  
protein\_coding"; old "TCONS\_00499065";  
protein\_coding"; old "TCONS\_00499065";  
protein\_coding"; old "TCONS\_00519887";  
protein\_coding"; old "TCONS\_00519887";  
protein\_coding"; old "TCONS\_00504977";  
protein\_coding"; old "TCONS\_00504977";  
protein\_coding"; old "TCONS\_00499107";  
protein\_coding"; old "TCONS\_00499107";  
protein\_coding"; old "TCONS\_00499107";  
protein\_coding"; old "TCONS\_00499107";  
protein\_coding"; old "TCONS\_00499106";  
protein\_coding"; old "TCONS\_00499106";  
protein\_coding"; old "TCONS\_00499106";  
protein\_coding"; old "TCONS\_00499106";  
protein\_coding"; old "TCONS\_00499105";

protein\_coding"; old "TCONS\_00499105";  
protein\_coding"; old "TCONS\_00499105";  
protein\_coding"; old "TCONS\_00499119";  
protein\_coding"; old "TCONS\_00499119";  
protein\_coding"; old "TCONS\_00499121";  
protein\_coding"; old "TCONS\_00499121";  
protein\_coding"; old "TCONS\_00499121";  
protein\_coding"; old "TCONS\_00499121";  
protein\_coding"; old "TCONS\_00523616";  
protein\_coding"; old "TCONS\_00523616";  
protein\_coding"; old "TCONS\_00523616";  
protein\_coding"; old "TCONS\_00519922";  
protein\_coding"; old "TCONS\_00499124";  
protein\_coding"; old "TCONS\_00510605";  
protein\_coding"; old "TCONS\_00510605";  
protein\_coding"; old "TCONS\_00516109";  
protein\_coding"; old "TCONS\_00516109";  
protein\_coding"; old "TCONS\_00499298";  
protein\_coding"; old "TCONS\_00499298";  
protein\_coding"; old "TCONS\_00499298";  
protein\_coding"; old "TCONS\_00499298";  
protein\_coding"; old "TCONS\_00499385";  
protein\_coding"; old "TCONS\_00499385";

protein\_coding"; old "TCONS\_00505376";  
protein\_coding"; old "TCONS\_00505376";  
protein\_coding"; old "TCONS\_00505376";  
protein\_coding"; old "TCONS\_00499525";  
protein\_coding"; old "TCONS\_00527575";  
protein\_coding"; old "TCONS\_00499657";  
protein\_coding"; old "TCONS\_00499657";  
protein\_coding"; old "TCONS\_00499657";  
protein\_coding"; old "TCONS\_00499657";  
protein\_coding"; old "TCONS\_00516409";  
protein\_coding"; old "TCONS\_00516409";  
protein\_coding"; old "TCONS\_00511214";  
protein\_coding"; old "TCONS\_00511214";  
protein\_coding"; old "TCONS\_00511214";  
protein\_coding"; old "TCONS\_00516418";  
protein\_coding"; old "TCONS\_00516418";  
protein\_coding"; old "TCONS\_00499808";  
protein\_coding"; old "TCONS\_00499808";  
protein\_coding"; old "TCONS\_00499808";  
protein\_coding"; old "TCONS\_00499808";  
protein\_coding"; old "TCONS\_00505774";  
protein\_coding"; old "TCONS\_00505774";  
protein\_coding"; old "TCONS\_00505774";  
protein\_coding"; old "TCONS\_00505774";

protein\_coding"; old "TCONS\_00505777";  
protein\_coding"; old "TCONS\_00505777";  
protein\_coding"; old "TCONS\_00505777";  
protein\_coding"; old "TCONS\_00505777";  
protein\_coding"; old "TCONS\_00524134";  
protein\_coding"; old "TCONS\_00524134";  
protein\_coding"; old "TCONS\_00524134";  
protein\_coding"; old "TCONS\_00516634";  
protein\_coding"; old "TCONS\_00500175";  
protein\_coding"; old "TCONS\_00500175";  
protein\_coding"; old "TCONS\_00500175";  
protein\_coding"; old "TCONS\_00500175";  
protein\_coding"; old "TCONS\_00531307";  
protein\_coding"; old "TCONS\_00531307";  
protein\_coding"; old "TCONS\_00531307";  
protein\_coding"; old "TCONS\_00500328";  
protein\_coding"; old "TCONS\_00500328";  
protein\_coding"; old "TCONS\_00500388";  
protein\_coding"; old "TCONS\_00500388";  
protein\_coding"; old "TCONS\_00506135";  
protein\_coding"; old "TCONS\_00506135";  
protein\_coding"; old "TCONS\_00500632";  
protein\_coding"; old "TCONS\_00500632";  
protein\_coding"; old "TCONS\_00500632";  
protein\_coding"; old "TCONS\_00500687";  
protein\_coding"; old "TCONS\_00500687";  
protein\_coding"; old "TCONS\_00506435";  
protein\_coding"; old "TCONS\_00506435";  
protein\_coding"; old "TCONS\_00506435";  
protein\_coding"; old "TCONS\_00512177";  
protein\_coding"; old "TCONS\_00512177";  
protein\_coding"; old "TCONS\_00520890";  
protein\_coding"; old "TCONS\_00520890";  
protein\_coding"; old "TCONS\_00520890";  
protein\_coding"; old "TCONS\_00517114";



protein\_coding"; old "TCONS\_00517114";  
protein\_coding"; old "TCONS\_00517114";  
protein\_coding"; old "TCONS\_00517114";  
protein\_coding"; old "TCONS\_00520892";  
protein\_coding"; old "TCONS\_00520892";  
protein\_coding"; old "TCONS\_00520892";  
protein\_coding"; old "TCONS\_00520892";  
protein\_coding"; old "TCONS\_00500774";  
protein\_coding"; old "TCONS\_00500774";  
protein\_coding"; old "TCONS\_00506439";  
protein\_coding"; old "TCONS\_00500807";  
protein\_coding"; old "TCONS\_00500807";  
protein\_coding"; old "TCONS\_00517232";  
protein\_coding"; old "TCONS\_00517232";  
protein\_coding"; old "TCONS\_00528325";  
protein\_coding"; old "TCONS\_00528325";  
protein\_coding"; old "TCONS\_00512369";  
protein\_coding"; old "TCONS\_00512369";  
protein\_coding"; old "TCONS\_00501063";  
protein\_coding"; old "TCONS\_00501063";  
protein\_coding"; old "TCONS\_00501108";  
protein\_coding"; old "TCONS\_00501108";  
protein\_coding"; old "TCONS\_00501108";  
protein\_coding"; old "TCONS\_00524784";  
protein\_coding"; old "TCONS\_00524784";  
protein\_coding"; old "TCONS\_00524784";  
protein\_coding"; old "TCONS\_00524784";  
protein\_coding"; old "TCONS\_00528415";  
protein\_coding"; old "TCONS\_00528415";  
protein\_coding"; old "TCONS\_00521095";  
protein\_coding"; old "TCONS\_00521095";  
protein\_coding"; old "TCONS\_00521095";

protein\_coding"; old "TCONS\_00521095";  
protein\_coding"; old "TCONS\_00501424";  
protein\_coding"; old "TCONS\_00501424";  
protein\_coding"; old "TCONS\_00501424";  
protein\_coding"; old "TCONS\_00501424";  
protein\_coding"; old "TCONS\_00512918";  
protein\_coding"; old "TCONS\_00512918";  
protein\_coding"; old "TCONS\_00512918";  
protein\_coding"; old "TCONS\_00501509";  
protein\_coding"; old "TCONS\_00501509";  
protein\_coding"; old "TCONS\_00507118";  
protein\_coding"; old "TCONS\_00507118";  
protein\_coding"; old "TCONS\_00507210";  
protein\_coding"; old "TCONS\_00507210";  
protein\_coding"; old "TCONS\_00507210";  
protein\_coding"; old "TCONS\_00507210";  
protein\_coding"; old "TCONS\_00501759";  
protein\_coding"; old "TCONS\_00501759";  
protein\_coding"; old "TCONS\_00507209";  
protein\_coding"; old "TCONS\_00507209";  
protein\_coding"; old "TCONS\_00507209";  
protein\_coding"; old "TCONS\_00501801";  
protein\_coding"; old "TCONS\_00501800";  
protein\_coding"; old "TCONS\_00501800";  
protein\_coding"; old "TCONS\_00501800";  
protein\_coding"; old "TCONS\_00501800";  
protein\_coding"; old "TCONS\_00517776";  
protein\_coding"; old "TCONS\_00517776";  
protein\_coding"; old "TCONS\_00517776";  
protein\_coding"; old "TCONS\_00501837";  
protein\_coding"; old "TCONS\_00501837";

protein\_coding"; old "TCONS\_00501837";  
protein\_coding"; old "TCONS\_00501837";  
protein\_coding"; old "TCONS\_00502004";  
protein\_coding"; old "TCONS\_00502004";  
protein\_coding"; old "TCONS\_00502004";  
protein\_coding"; old "TCONS\_00502004";  
protein\_coding"; old "TCONS\_00513485";  
protein\_coding"; old "TCONS\_00513485";  
protein\_coding"; old "TCONS\_00513485";  
protein\_coding"; old "TCONS\_00502003";  
protein\_coding"; old "TCONS\_00502003";  
protein\_coding"; old "TCONS\_00517886";  
protein\_coding"; old "TCONS\_00517886";  
protein\_coding"; old "TCONS\_00517886";  
protein\_coding"; old "TCONS\_00521572";  
protein\_coding"; old "TCONS\_00521572";  
protein\_coding"; old "TCONS\_00525343";  
protein\_coding"; old "TCONS\_00525343";  
protein\_coding"; old "TCONS\_00525343";  
protein\_coding"; old "TCONS\_00502046";  
protein\_coding"; old "TCONS\_00502046";  
protein\_coding"; old "TCONS\_00502046";  
protein\_coding"; old "TCONS\_00502046";  
protein\_coding"; old "TCONS\_00507454";  
protein\_coding"; old "TCONS\_00507454";  
protein\_coding"; old "TCONS\_00528960";  
protein\_coding"; old "TCONS\_00528960";  
protein\_coding"; old "TCONS\_00517949";  
protein\_coding"; old "TCONS\_00517949";  
protein\_coding"; old "TCONS\_00517949";  
protein\_coding"; old "TCONS\_00513589";  
protein\_coding"; old "TCONS\_00513589";  
protein\_coding"; old "TCONS\_00507515";  
protein\_coding"; old "TCONS\_00507515";  
protein\_coding"; old "TCONS\_00507528";

protein\_coding"; old "TCONS\_00507528";  
protein\_coding"; old "TCONS\_00507528";  
protein\_coding"; old "TCONS\_00529030";  
protein\_coding"; old "TCONS\_00502201";  
protein\_coding"; old "TCONS\_00521714";  
protein\_coding"; old "TCONS\_00532387";  
protein\_coding"; old "TCONS\_00532387";  
protein\_coding"; old "TCONS\_00502290";  
protein\_coding"; old "TCONS\_00502290";  
protein\_coding"; old "TCONS\_00502294";  
protein\_coding"; old "TCONS\_00502294";  
protein\_coding"; old "TCONS\_00502294";  
protein\_coding"; old "TCONS\_00507683";  
protein\_coding"; old "TCONS\_00507683";  
protein\_coding"; old "TCONS\_00507683";  
protein\_coding"; old "TCONS\_00502406";  
protein\_coding"; old "TCONS\_00502486";  
protein\_coding"; old "TCONS\_00502486";  
protein\_coding"; old "TCONS\_00502579";  
protein\_coding"; old "TCONS\_00502579";

protein\_coding"; old "TCONS\_00502677";  
protein\_coding"; old "TCONS\_00502822";  
protein\_coding"; old "TCONS\_00502822";  
protein\_coding"; old "TCONS\_00502839";  
protein\_coding"; old "TCONS\_00502839";  
protein\_coding"; old "TCONS\_00502840";  
protein\_coding"; old "TCONS\_00502840";  
protein\_coding"; old "TCONS\_00539827";  
protein\_coding"; old "TCONS\_00539827";  
protein\_coding"; old "TCONS\_00539827";  
protein\_coding"; old "TCONS\_00536018";  
protein\_coding"; old "TCONS\_00536018";  
protein\_coding"; old "TCONS\_00536018";  
protein\_coding"; old "TCONS\_00542950";  
protein\_coding"; old "TCONS\_00542950";  
protein\_coding"; old "TCONS\_00542950";  
protein\_coding"; old "TCONS\_00539840";  
protein\_coding"; old "TCONS\_00539840";  
protein\_coding"; old "TCONS\_00539866";  
protein\_coding"; old "TCONS\_00539866";  
protein\_coding"; old "TCONS\_00536091";  
protein\_coding"; old "TCONS\_00536148";  
protein\_coding"; old "TCONS\_00536229";  
protein\_coding"; old "TCONS\_00536229";  
protein\_coding"; old "TCONS\_00536229";  
protein\_coding"; old "TCONS\_00549154";  
protein\_coding"; old "TCONS\_00549154";  
protein\_coding"; old "TCONS\_00549154";  
protein\_coding"; old "TCONS\_00540100";



protein\_coding"; old "TCONS\_00536635";  
protein\_coding"; old "TCONS\_00543578";  
protein\_coding"; old "TCONS\_00536740";  
protein\_coding"; old "TCONS\_00543577";  
protein\_coding"; old "TCONS\_00543577";  
protein\_coding"; old "TCONS\_00543577";  
protein\_coding"; old "TCONS\_00543577";  
protein\_coding"; old "TCONS\_00536764";  
protein\_coding"; old "TCONS\_00536764";  
protein\_coding"; old "TCONS\_00536766";  
protein\_coding"; old "TCONS\_00536766";  
protein\_coding"; old "TCONS\_00540449";  
protein\_coding"; old "TCONS\_00540449";  
protein\_coding"; old "TCONS\_00540449";  
protein\_coding"; old "TCONS\_00540449";  
protein\_coding"; old "TCONS\_00543603";  
protein\_coding"; old "TCONS\_00543603";  
protein\_coding"; old "TCONS\_00543603";  
protein\_coding"; old "TCONS\_00543603";  
protein\_coding"; old "TCONS\_00547134";  
protein\_coding"; old "TCONS\_00547134";  
protein\_coding"; old "TCONS\_00547134";  
protein\_coding"; old "TCONS\_00536789";  
protein\_coding"; old "TCONS\_00536789";  
protein\_coding"; old "TCONS\_00536789";

protein\_coding"; old "TCONS\_00536789";  
protein\_coding"; old "TCONS\_00547142";  
protein\_coding"; old "TCONS\_00536792";  
protein\_coding"; old "TCONS\_00536792";  
protein\_coding"; old "TCONS\_00536792";  
protein\_coding"; old "TCONS\_00536792";  
protein\_coding"; old "TCONS\_00536818";  
protein\_coding"; old "TCONS\_00536818";  
protein\_coding"; old "TCONS\_00540490";  
protein\_coding"; old "TCONS\_00540490";  
protein\_coding"; old "TCONS\_00540490";  
protein\_coding"; old "TCONS\_00540490";  
protein\_coding"; old "TCONS\_00543997";  
protein\_coding"; old "TCONS\_00537197";  
protein\_coding"; old "TCONS\_00537197";  
protein\_coding"; old "TCONS\_00537197";  
protein\_coding"; old "TCONS\_00547449";  
protein\_coding"; old "TCONS\_00547449";  
protein\_coding"; old "TCONS\_00537393";  
protein\_coding"; old "TCONS\_00537393";  
protein\_coding"; old "TCONS\_00537404";  
protein\_coding"; old "TCONS\_00537404";  
protein\_coding"; old "TCONS\_00537406";  
protein\_coding"; old "TCONS\_00537406";  
protein\_coding"; old "TCONS\_00541018";  
protein\_coding"; old "TCONS\_00541018";  
protein\_coding"; old "TCONS\_00541025";



protein\_coding"; old "TCONS\_00541025";  
protein\_coding"; old "TCONS\_00537524";  
protein\_coding"; old "TCONS\_00537525";  
protein\_coding"; old "TCONS\_00537525";  
protein\_coding"; old "TCONS\_00537525";  
protein\_coding"; old "TCONS\_00537525";  
protein\_coding"; old "TCONS\_00537547";  
protein\_coding"; old "TCONS\_00537610";  
protein\_coding"; old "TCONS\_00537610";  
protein\_coding"; old "TCONS\_00537610";  
protein\_coding"; old "TCONS\_00537610";  
protein\_coding"; old "TCONS\_00537678";  
protein\_coding"; old "TCONS\_00541320";  
protein\_coding"; old "TCONS\_00556414";  
protein\_coding"; old "TCONS\_00541356";  
protein\_coding"; old "TCONS\_00537966";  
protein\_coding"; old "TCONS\_00537966";  
protein\_coding"; old "TCONS\_00537966";  
protein\_coding"; old "TCONS\_00537966";  
protein\_coding"; old "TCONS\_00544886";  
protein\_coding"; old "TCONS\_00544886";  
protein\_coding"; old "TCONS\_00544886";  
protein\_coding"; old "TCONS\_00541411";  
protein\_coding"; old "TCONS\_00541411";  
protein\_coding"; old "TCONS\_00537968";  
protein\_coding"; old "TCONS\_00537968";  
protein\_coding"; old "TCONS\_00537968";  
protein\_coding"; old "TCONS\_00537973";  
protein\_coding"; old "TCONS\_00537973";

protein\_coding"; old "TCONS\_00537973";  
protein\_coding"; old "TCONS\_00547880";  
protein\_coding"; old "TCONS\_00547880";  
protein\_coding"; old "TCONS\_00547880";  
protein\_coding"; old "TCONS\_00547880";  
protein\_coding"; old "TCONS\_00538013";  
protein\_coding"; old "TCONS\_00538013";  
protein\_coding"; old "TCONS\_00538049";  
protein\_coding"; old "TCONS\_00538049";  
protein\_coding"; old "TCONS\_00538049";  
protein\_coding"; old "TCONS\_00541543";  
protein\_coding"; old "TCONS\_00538174";  
protein\_coding"; old "TCONS\_00541605";  
protein\_coding"; old "TCONS\_00541605";  
protein\_coding"; old "TCONS\_00538385";  
protein\_coding"; old "TCONS\_00538385";  
protein\_coding"; old "TCONS\_00538385";  
protein\_coding"; old "TCONS\_00538385";  
protein\_coding"; old "TCONS\_00538480";  
protein\_coding"; old "TCONS\_00538480";  
protein\_coding"; old "TCONS\_00538480";  
protein\_coding"; old "TCONS\_00538483";  
protein\_coding"; old "TCONS\_00538483";  
protein\_coding"; old "TCONS\_00538483";  
protein\_coding"; old "TCONS\_00538488";  
protein\_coding"; old "TCONS\_00538488";  
protein\_coding"; old "TCONS\_00538488";  
protein\_coding"; old "TCONS\_00538488";

protein\_coding"; old "TCONS\_00552661";  
protein\_coding"; old "TCONS\_00552661";  
protein\_coding"; old "TCONS\_00538548";  
protein\_coding"; old "TCONS\_00538548";  
protein\_coding"; old "TCONS\_00541886";  
protein\_coding"; old "TCONS\_00541886";  
protein\_coding"; old "TCONS\_00538805";  
protein\_coding"; old "TCONS\_00545621";  
protein\_coding"; old "TCONS\_00545621";  
protein\_coding"; old "TCONS\_00545621";  
protein\_coding"; old "TCONS\_00538902";  
protein\_coding"; old "TCONS\_00538902";  
protein\_coding"; old "TCONS\_00538902";  
protein\_coding"; old "TCONS\_00538904";  
protein\_coding"; old "TCONS\_00538904";  
protein\_coding"; old "TCONS\_00538971";  
protein\_coding"; old "TCONS\_00538995";  
protein\_coding"; old "TCONS\_00538995";  
protein\_coding"; old "TCONS\_00538995";  
protein\_coding"; old "TCONS\_00542206";  
protein\_coding"; old "TCONS\_00542206";  
protein\_coding"; old "TCONS\_00542206";  
protein\_coding"; old "TCONS\_00539037";  
protein\_coding"; old "TCONS\_00539037";  
protein\_coding"; old "TCONS\_00548618";  
protein\_coding"; old "TCONS\_00539385";  
protein\_coding"; old "TCONS\_00539385";  
protein\_coding"; old "TCONS\_00539385";  
protein\_coding"; old "TCONS\_00539385";  
protein\_coding"; old "TCONS\_00539417";  
protein\_coding"; old "TCONS\_00539417";







protein\_coding"; old "TCONS\_00565061";  
protein\_coding"; old "TCONS\_00565061";  
protein\_coding"; old "TCONS\_00565061";  
protein\_coding"; old "TCONS\_00565061";  
protein\_coding"; old "TCONS\_00569738";  
protein\_coding"; old "TCONS\_00569738";  
protein\_coding"; old "TCONS\_00569738";  
protein\_coding"; old "TCONS\_00559792";  
protein\_coding"; old "TCONS\_00559922";  
protein\_coding"; old "TCONS\_00565267";  
protein\_coding"; old "TCONS\_00570110";  
protein\_coding"; old "TCONS\_00570110";  
protein\_coding"; old "TCONS\_00582006";  
protein\_coding"; old "TCONS\_00582006";  
protein\_coding"; old "TCONS\_00582006";  
protein\_coding"; old "TCONS\_00575294";  
protein\_coding"; old "TCONS\_00575294";  
protein\_coding"; old "TCONS\_00560191";  
protein\_coding"; old "TCONS\_00560250";  
protein\_coding"; old "TCONS\_00560250";  
protein\_coding"; old "TCONS\_00560250";

protein\_coding"; old "TCONS\_00560250";  
protein\_coding"; old "TCONS\_00570254";  
protein\_coding"; old "TCONS\_00570254";  
protein\_coding"; old "TCONS\_00570254";  
protein\_coding"; old "TCONS\_00570254";  
protein\_coding"; old "TCONS\_00560318";  
protein\_coding"; old "TCONS\_00560318";  
protein\_coding"; old "TCONS\_00565588";  
protein\_coding"; old "TCONS\_00565588";  
protein\_coding"; old "TCONS\_00565588";  
protein\_coding"; old "TCONS\_00560347";  
protein\_coding"; old "TCONS\_00560347";  
protein\_coding"; old "TCONS\_00560351";  
protein\_coding"; old "TCONS\_00560351";  
protein\_coding"; old "TCONS\_00560355";  
protein\_coding"; old "TCONS\_00560355";  
protein\_coding"; old "TCONS\_00560383";  
protein\_coding"; old "TCONS\_00560391";  
protein\_coding"; old "TCONS\_00560406";  
protein\_coding"; old "TCONS\_00560406";  
protein\_coding"; old "TCONS\_00560742";  
protein\_coding"; old "TCONS\_00560742";  
protein\_coding"; old "TCONS\_00560742";  
protein\_coding"; old "TCONS\_00575694";  
protein\_coding"; old "TCONS\_00566049";  
protein\_coding"; old "TCONS\_00566049";  
protein\_coding"; old "TCONS\_00575763";



protein\_coding"; old "TCONS\_00575763";  
protein\_coding"; old "TCONS\_00561031";  
protein\_coding"; old "TCONS\_00561110";  
protein\_coding"; old "TCONS\_00561110";  
protein\_coding"; old "TCONS\_00561110";  
protein\_coding"; old "TCONS\_00561110";  
protein\_coding"; old "TCONS\_00566423";  
protein\_coding"; old "TCONS\_00566423";  
protein\_coding"; old "TCONS\_00566423";  
protein\_coding"; old "TCONS\_00561336";  
protein\_coding"; old "TCONS\_00561336";  
protein\_coding"; old "TCONS\_00579535";  
protein\_coding"; old "TCONS\_00579535";  
protein\_coding"; old "TCONS\_00579535";  
protein\_coding"; old "TCONS\_00579535";  
protein\_coding"; old "TCONS\_00561521";  
protein\_coding"; old "TCONS\_00561521";  
protein\_coding"; old "TCONS\_00561620";  
protein\_coding"; old "TCONS\_00561620";  
protein\_coding"; old "TCONS\_00561620";  
protein\_coding"; old "TCONS\_00561622";  
protein\_coding"; old "TCONS\_00566811";  
protein\_coding"; old "TCONS\_00566811";  
protein\_coding"; old "TCONS\_00561856";  
protein\_coding"; old "TCONS\_00561856";  
protein\_coding"; old "TCONS\_00566916";  
protein\_coding"; old "TCONS\_00566916";  
protein\_coding"; old "TCONS\_00566935";  
protein\_coding"; old "TCONS\_00566935";  
protein\_coding"; old "TCONS\_00576503";

protein\_coding"; old "TCONS\_00576503";  
protein\_coding"; old "TCONS\_00576503";  
protein\_coding"; old "TCONS\_00576567";  
protein\_coding"; old "TCONS\_00576567";  
protein\_coding"; old "TCONS\_00576567";  
protein\_coding"; old "TCONS\_00576567";  
protein\_coding"; old "TCONS\_00562150";  
protein\_coding"; old "TCONS\_00562150";  
protein\_coding"; old "TCONS\_00572312";  
protein\_coding"; old "TCONS\_00572312";  
protein\_coding"; old "TCONS\_00572312";  
protein\_coding"; old "TCONS\_00572312";  
protein\_coding"; old "TCONS\_00567156";  
protein\_coding"; old "TCONS\_00567156";  
protein\_coding"; old "TCONS\_00567156";  
protein\_coding"; old "TCONS\_00567156";  
protein\_coding"; old "TCONS\_00567167";  
protein\_coding"; old "TCONS\_00567167";  
protein\_coding"; old "TCONS\_00567167";  
protein\_coding"; old "TCONS\_00567167";  
protein\_coding"; old "TCONS\_00576666";  
protein\_coding"; old "TCONS\_00576666";  
protein\_coding"; old "TCONS\_00562294";  
protein\_coding"; old "TCONS\_00562294";  
protein\_coding"; old "TCONS\_00562399";  
protein\_coding"; old "TCONS\_00562399";  
protein\_coding"; old "TCONS\_00562399";  
protein\_coding"; old "TCONS\_00562399";  
protein\_coding"; old "TCONS\_00586481";  
protein\_coding"; old "TCONS\_00586481";  
protein\_coding"; old "TCONS\_00572545";  
protein\_coding"; old "TCONS\_00572545";  
protein\_coding"; old "TCONS\_00572544";  
protein\_coding"; old "TCONS\_00572544";  
protein\_coding"; old "TCONS\_00572544";  
protein\_coding"; old "TCONS\_00572544";  
protein\_coding"; old "TCONS\_00576796";  
protein\_coding"; old "TCONS\_00576796";

protein\_coding"; old "TCONS\_00576796";  
protein\_coding"; old "TCONS\_00576796";  
protein\_coding"; old "TCONS\_00562470";  
protein\_coding"; old "TCONS\_00562470";  
protein\_coding"; old "TCONS\_00562564";  
protein\_coding"; old "TCONS\_00562564";  
protein\_coding"; old "TCONS\_00567461";  
protein\_coding"; old "TCONS\_00567461";  
protein\_coding"; old "TCONS\_00567461";  
protein\_coding"; old "TCONS\_00567538";  
protein\_coding"; old "TCONS\_00562792";  
protein\_coding"; old "TCONS\_00562847";  
protein\_coding"; old "TCONS\_00562847";  
protein\_coding"; old "TCONS\_00562918";  
protein\_coding"; old "TCONS\_00562929";  
protein\_coding"; old "TCONS\_00562929";  
protein\_coding"; old "TCONS\_00562929";  
protein\_coding"; old "TCONS\_00562930";  
protein\_coding"; old "TCONS\_00562930";  
protein\_coding"; old "TCONS\_00567782";  
protein\_coding"; old "TCONS\_00567782";  
protein\_coding"; old "TCONS\_00567782";  
protein\_coding"; old "TCONS\_00567782";

protein\_coding"; old "TCONS\_00567782";  
protein\_coding"; old "TCONS\_00567782";  
protein\_coding"; old "TCONS\_00567782";  
protein\_coding"; old "TCONS\_00567782";  
protein\_coding"; old "TCONS\_00567782";  
"protein\_coding"; old "TCONS\_00567782";  
"protein\_coding"; old "TCONS\_00567782";  
protein\_coding"; old "TCONS\_00580471";  
protein\_coding"; old "TCONS\_00580471";  
protein\_coding"; old "TCONS\_00580471";  
protein\_coding"; old "TCONS\_00580471";  
protein\_coding"; old "TCONS\_00567783";  
protein\_coding"; old "TCONS\_00567783";  
protein\_coding"; old "TCONS\_00567783";  
protein\_coding"; old "TCONS\_00563033";  
protein\_coding"; old "TCONS\_00563033";  
protein\_coding"; old "TCONS\_00563033";  
protein\_coding"; old "TCONS\_00563055";  
protein\_coding"; old "TCONS\_00563055";  
protein\_coding"; old "TCONS\_00563055";  
protein\_coding"; old "TCONS\_00563055";  
protein\_coding"; old "TCONS\_00573114";  
protein\_coding"; old "TCONS\_00573114";  
protein\_coding"; old "TCONS\_00573114";  
protein\_coding"; old "TCONS\_00573114";  
protein\_coding"; old "TCONS\_00563054";  
protein\_coding"; old "TCONS\_00563054";  
protein\_coding"; old "TCONS\_00586807";  
protein\_coding"; old "TCONS\_00586807";  
protein\_coding"; old "TCONS\_00567875";  
protein\_coding"; old "TCONS\_00567875";  
protein\_coding"; old "TCONS\_00573155";  
protein\_coding"; old "TCONS\_00573155";  
protein\_coding"; old "TCONS\_00573200";  
protein\_coding"; old "TCONS\_00573200";  
protein\_coding"; old "TCONS\_00563157";

protein\_coding"; old "TCONS\_00563157";  
protein\_coding"; old "TCONS\_00563157";  
protein\_coding"; old "TCONS\_00568121";  
protein\_coding"; old "TCONS\_00568121";  
protein\_coding"; old "TCONS\_00577464";  
protein\_coding"; old "TCONS\_00577464";  
protein\_coding"; old "TCONS\_00580794";  
protein\_coding"; old "TCONS\_00580794";  
protein\_coding"; old "TCONS\_00563667";  
protein\_coding"; old "TCONS\_00563667";  
protein\_coding"; old "TCONS\_00563667";  
protein\_coding"; old "TCONS\_00563908";  
protein\_coding"; old "TCONS\_00563908";  
protein\_coding"; old "TCONS\_00563908";  
protein\_coding"; old "TCONS\_00574021";  
protein\_coding"; old "TCONS\_00574021";  
protein\_coding"; old "TCONS\_00564180";  
protein\_coding"; old "TCONS\_00564207";  
protein\_coding"; old "TCONS\_00564207";  
protein\_coding"; old "TCONS\_00564234";  
protein\_coding"; old "TCONS\_00564299";  
protein\_coding"; old "TCONS\_00584518";  
protein\_coding"; old "TCONS\_00584518";  
protein\_coding"; old "TCONS\_00584518";

protein\_coding"; old "TCONS\_00584518";  
protein\_coding"; old "TCONS\_00584518";  
protein\_coding"; old "TCONS\_00584518";  
protein\_coding"; old "TCONS\_00584518";  
protein\_coding"; old "TCONS\_00584518";  
protein\_coding"; old "TCONS\_00584517";  
protein\_coding"; old "TCONS\_00584517";  
protein\_coding"; old "TCONS\_00574405";  
protein\_coding"; old "TCONS\_00564343";  
protein\_coding"; old "TCONS\_00564343";  
protein\_coding"; old "TCONS\_00568977";  
protein\_coding"; old "TCONS\_00568977";  
protein\_coding"; old "TCONS\_00568977";  
protein\_coding"; old "TCONS\_00568977";  
protein\_coding"; old "TCONS\_00564420";  
protein\_coding"; old "TCONS\_00564420";  
protein\_coding"; old "TCONS\_00564420";  
protein\_coding"; old "TCONS\_00578087";  
protein\_coding"; old "TCONS\_00578087";  
protein\_coding"; old "TCONS\_00584594";  
protein\_coding"; old "TCONS\_00584594";  
protein\_coding"; old "TCONS\_00578088";  
protein\_coding"; old "TCONS\_00590383";  
protein\_coding"; old "TCONS\_00590383";  
protein\_coding"; old "TCONS\_00590383";  
protein\_coding"; old "TCONS\_00590383";  
protein\_coding"; old "TCONS\_00569022";  
protein\_coding"; old "TCONS\_00569022";







protein\_coding"; old "TCONS\_00593317";  
protein\_coding"; old "TCONS\_00597569";  
protein\_coding"; old "TCONS\_00597569";  
protein\_coding"; old "TCONS\_00597569";  
protein\_coding"; old "TCONS\_00593345";  
protein\_coding"; old "TCONS\_00593345";  
protein\_coding"; old "TCONS\_00593348";  
protein\_coding"; old "TCONS\_00608775";  
protein\_coding"; old "TCONS\_00593354";  
protein\_coding"; old "TCONS\_00593353";  
protein\_coding"; old "TCONS\_00601431";  
protein\_coding"; old "TCONS\_00601431";  
protein\_coding"; old "TCONS\_00597591";  
protein\_coding"; old "TCONS\_00597591";  
protein\_coding"; old "TCONS\_00597591";  
protein\_coding"; old "TCONS\_00601436";  
protein\_coding"; old "TCONS\_00601436";  
protein\_coding"; old "TCONS\_00616525";

protein\_coding"; old "TCONS\_00616525";  
protein\_coding"; old "TCONS\_00597604";  
protein\_coding"; old "TCONS\_00597607";  
protein\_coding"; old "TCONS\_00597607";  
protein\_coding"; old "TCONS\_00597617";  
protein\_coding"; old "TCONS\_00597617";  
protein\_coding"; old "TCONS\_00597617";  
protein\_coding"; old "TCONS\_00597617";  
protein\_coding"; old "TCONS\_00593396";  
protein\_coding"; old "TCONS\_00593396";  
protein\_coding"; old "TCONS\_00593396";  
protein\_coding"; old "TCONS\_00593396";  
protein\_coding"; old "TCONS\_00593397";  
protein\_coding"; old "TCONS\_00601485";  
protein\_coding"; old "TCONS\_00601485";  
protein\_coding"; old "TCONS\_00601486";  
protein\_coding"; old "TCONS\_00601486";  
protein\_coding"; old "TCONS\_00593409";  
protein\_coding"; old "TCONS\_00593409";  
protein\_coding"; old "TCONS\_00593410";  
protein\_coding"; old "TCONS\_00593410";  
protein\_coding"; old "TCONS\_00601490";  
protein\_coding"; old "TCONS\_00601490";  
protein\_coding"; old "TCONS\_00601490";



"protein\_coding"; old "TCONS\_00614036";  
"protein\_coding"; old "TCONS\_00614036";  
protein\_coding"; old "TCONS\_00593455";  
protein\_coding"; old "TCONS\_00593455";  
protein\_coding"; old "TCONS\_00593455";  
protein\_coding"; old "TCONS\_00593455";  
protein\_coding"; old "TCONS\_00593473";  
protein\_coding"; old "TCONS\_00593473";  
protein\_coding"; old "TCONS\_00593473";  
protein\_coding"; old "TCONS\_00597699";  
protein\_coding"; old "TCONS\_00597699";  
protein\_coding"; old "TCONS\_00593476";  
protein\_coding"; old "TCONS\_00593476";  
protein\_coding"; old "TCONS\_00606056";  
protein\_coding"; old "TCONS\_00606056";  
protein\_coding"; old "TCONS\_00593498";  
protein\_coding"; old "TCONS\_00593498";  
protein\_coding"; old "TCONS\_00601596";  
protein\_coding"; old "TCONS\_00601595";  
protein\_coding"; old "TCONS\_00593514";  
protein\_coding"; old "TCONS\_00593514";  
protein\_coding"; old "TCONS\_00597727";  
protein\_coding"; old "TCONS\_00597738";  
protein\_coding"; old "TCONS\_00597738";  
protein\_coding"; old "TCONS\_00593540";  
protein\_coding"; old "TCONS\_00593540";  
protein\_coding"; old "TCONS\_00593559";  
protein\_coding"; old "TCONS\_00593559";

protein\_coding"; old "TCONS\_00593665";  
protein\_coding"; old "TCONS\_00593665";  
protein\_coding"; old "TCONS\_00606220";  
protein\_coding"; old "TCONS\_00606220";  
protein\_coding"; old "TCONS\_00601867";  
protein\_coding"; old "TCONS\_00601867";  
protein\_coding"; old "TCONS\_00601867";  
protein\_coding"; old "TCONS\_00609029";  
protein\_coding"; old "TCONS\_00606257";  
protein\_coding"; old "TCONS\_00597963";  
protein\_coding"; old "TCONS\_00601915";  
protein\_coding"; old "TCONS\_00593778";  
protein\_coding"; old "TCONS\_00593778";  
protein\_coding"; old "TCONS\_00593778";  
protein\_coding"; old "TCONS\_00593778";

protein\_coding"; old "TCONS\_00593778";  
protein\_coding"; old "TCONS\_00593778";  
protein\_coding"; old "TCONS\_00593777";  
protein\_coding"; old "TCONS\_00601934";  
protein\_coding"; old "TCONS\_00601934";  
protein\_coding"; old "TCONS\_00601934";  
protein\_coding"; old "TCONS\_00593838";  
protein\_coding"; old "TCONS\_00593865";  
protein\_coding"; old "TCONS\_00593865";  
protein\_coding"; old "TCONS\_00593865";  
protein\_coding"; old "TCONS\_00614309";  
protein\_coding"; old "TCONS\_00614309";  
protein\_coding"; old "TCONS\_00614309";  
protein\_coding"; old "TCONS\_00614309";  
protein\_coding"; old "TCONS\_00593864";  
protein\_coding"; old "TCONS\_00593864";  
protein\_coding"; old "TCONS\_00593864";  
protein\_coding"; old "TCONS\_00593864";  
protein\_coding"; old "TCONS\_00593978";  
protein\_coding"; old "TCONS\_00593978";  
protein\_coding"; old "TCONS\_00594008";  
protein\_coding"; old "TCONS\_00594008";  
protein\_coding"; old "TCONS\_00606420";  
protein\_coding"; old "TCONS\_00598196";  
protein\_coding"; old "TCONS\_00598196";  
protein\_coding"; old "TCONS\_00602318";



protein\_coding"; old "TCONS\_00594514";  
protein\_coding"; old "TCONS\_00602915";  
protein\_coding"; old "TCONS\_00609544";  
protein\_coding"; old "TCONS\_00609544";  
protein\_coding"; old "TCONS\_00609544";  
protein\_coding"; old "TCONS\_00609544";  
protein\_coding"; old "TCONS\_00594720";  
protein\_coding"; old "TCONS\_00594721";  
protein\_coding"; old "TCONS\_00594724";  
protein\_coding"; old "TCONS\_00594723";  
protein\_coding"; old "TCONS\_00594865";  
protein\_coding"; old "TCONS\_00594865";  
protein\_coding"; old "TCONS\_00594865";  
protein\_coding"; old "TCONS\_00594864";  
protein\_coding"; old "TCONS\_00594864";  
protein\_coding"; old "TCONS\_00594881";  
protein\_coding"; old "TCONS\_00594930";  
protein\_coding"; old "TCONS\_00595119";  
protein\_coding"; old "TCONS\_00595119";  
protein\_coding"; old "TCONS\_00595138";  
protein\_coding"; old "TCONS\_00595138";



protein\_coding"; old "TCONS\_00599305";  
protein\_coding"; old "TCONS\_00599305";  
protein\_coding"; old "TCONS\_00599305";  
protein\_coding"; old "TCONS\_00617734";  
protein\_coding"; old "TCONS\_00599497";  
protein\_coding"; old "TCONS\_00595545";  
protein\_coding"; old "TCONS\_00595545";  
protein\_coding"; old "TCONS\_00595545";  
protein\_coding"; old "TCONS\_00595548";  
protein\_coding"; old "TCONS\_00595548";  
protein\_coding"; old "TCONS\_00595577";  
protein\_coding"; old "TCONS\_00595577";  
protein\_coding"; old "TCONS\_00595577";  
protein\_coding"; old "TCONS\_00595606";  
protein\_coding"; old "TCONS\_00595606";  
protein\_coding"; old "TCONS\_00595608";  
protein\_coding"; old "TCONS\_00595607";  
protein\_coding"; old "TCONS\_00595607";  
protein\_coding"; old "TCONS\_00595607";  
protein\_coding"; old "TCONS\_00595607";

protein\_coding"; old "TCONS\_00603916";  
protein\_coding"; old "TCONS\_00599574";  
protein\_coding"; old "TCONS\_00599574";  
protein\_coding"; old "TCONS\_00595649";  
protein\_coding"; old "TCONS\_00595649";  
protein\_coding"; old "TCONS\_00595649";  
protein\_coding"; old "TCONS\_00595654";  
protein\_coding"; old "TCONS\_00595654";  
protein\_coding"; old "TCONS\_00595654";  
protein\_coding"; old "TCONS\_00595654";  
protein\_coding"; old "TCONS\_00595665";  
protein\_coding"; old "TCONS\_00599603";  
protein\_coding"; old "TCONS\_00595684";  
protein\_coding"; old "TCONS\_00607544";  
protein\_coding"; old "TCONS\_00607544";  
protein\_coding"; old "TCONS\_00607544";

protein\_coding"; old "TCONS\_00607544";  
protein\_coding"; old "TCONS\_00607544";  
protein\_coding"; old "TCONS\_00607544";  
protein\_coding"; old "TCONS\_00603988";  
protein\_coding"; old "TCONS\_00599641";  
protein\_coding"; old "TCONS\_00599641";  
protein\_coding"; old "TCONS\_00595702";  
protein\_coding"; old "TCONS\_00595702";  
protein\_coding"; old "TCONS\_00599650";  
protein\_coding"; old "TCONS\_00599650";  
protein\_coding"; old "TCONS\_00595709";  
protein\_coding"; old "TCONS\_00595709";  
protein\_coding"; old "TCONS\_00595729";  
protein\_coding"; old "TCONS\_00595729";  
protein\_coding"; old "TCONS\_00595775";  
protein\_coding"; old "TCONS\_00595775";  
protein\_coding"; old "TCONS\_00607605";  
protein\_coding"; old "TCONS\_00607605";  
protein\_coding"; old "TCONS\_00617876";  
protein\_coding"; old "TCONS\_00595808";  
protein\_coding"; old "TCONS\_00595808";  
protein\_coding"; old "TCONS\_00595808";  
protein\_coding"; old "TCONS\_00604174";  
protein\_coding"; old "TCONS\_00599839";  
protein\_coding"; old "TCONS\_00599839";  
protein\_coding"; old "TCONS\_00599839";  
protein\_coding"; old "TCONS\_00599839";  
protein\_coding"; old "TCONS\_00595949";  
protein\_coding"; old "TCONS\_00595949";  
protein\_coding"; old "TCONS\_00595949";  
protein\_coding"; old "TCONS\_00595949";

protein\_coding"; old "TCONS\_00595949";  
protein\_coding"; old "TCONS\_00595950";  
protein\_coding"; old "TCONS\_00595950";  
protein\_coding"; old "TCONS\_00595950";  
protein\_coding"; old "TCONS\_00595960";  
protein\_coding"; old "TCONS\_00595960";  
protein\_coding"; old "TCONS\_00595986";  
protein\_coding"; old "TCONS\_00595986";  
protein\_coding"; old "TCONS\_00599871";  
protein\_coding"; old "TCONS\_00599871";  
protein\_coding"; old "TCONS\_00599871";  
protein\_coding"; old "TCONS\_00612962";  
protein\_coding"; old "TCONS\_00612962";  
protein\_coding"; old "TCONS\_00612962";  
protein\_coding"; old "TCONS\_00612962";  
protein\_coding"; old "TCONS\_00595987";  
protein\_coding"; old "TCONS\_00595987";  
protein\_coding"; old "TCONS\_00599874";  
protein\_coding"; old "TCONS\_00599874";  
protein\_coding"; old "TCONS\_00599887";  
protein\_coding"; old "TCONS\_00599887";  
protein\_coding"; old "TCONS\_00599887";  
protein\_coding"; old "TCONS\_00599887";  
protein\_coding"; old "TCONS\_00599888";  
protein\_coding"; old "TCONS\_00599888";  
protein\_coding"; old "TCONS\_00599888";  
protein\_coding"; old "TCONS\_00599888";  
protein\_coding"; old "TCONS\_00596013";  
protein\_coding"; old "TCONS\_00596013";  
protein\_coding"; old "TCONS\_00596013";  
protein\_coding"; old "TCONS\_00596147";  
protein\_coding"; old "TCONS\_00596147";  
protein\_coding"; old "TCONS\_00613137";  
protein\_coding"; old "TCONS\_00605041";  
protein\_coding"; old "TCONS\_00605041";  
protein\_coding"; old "TCONS\_00596592";

protein\_coding"; old "TCONS\_00596592";  
protein\_coding"; old "TCONS\_00600500";  
protein\_coding"; old "TCONS\_00600500";  
protein\_coding"; old "TCONS\_00596905";  
protein\_coding"; old "TCONS\_00596905";  
protein\_coding"; old "TCONS\_00596908";  
protein\_coding"; old "TCONS\_00596969";  
protein\_coding"; old "TCONS\_00596969";  
protein\_coding"; old "TCONS\_00597219";  
protein\_coding"; old "TCONS\_00597219";  
protein\_coding"; old "TCONS\_00620812";  
protein\_coding"; old "TCONS\_00620812";  
protein\_coding"; old "TCONS\_00620812";  
protein\_coding"; old "TCONS\_00630808";  
protein\_coding"; old "TCONS\_00630808";  
protein\_coding"; old "TCONS\_00627024";  
protein\_coding"; old "TCONS\_00627024";  
protein\_coding"; old "TCONS\_00627024";  
protein\_coding"; old "TCONS\_00627024";  
protein\_coding"; old "TCONS\_00630809";  
protein\_coding"; old "TCONS\_00630809";  
protein\_coding"; old "TCONS\_00630809";  
protein\_coding"; old "TCONS\_00620830";  
protein\_coding"; old "TCONS\_00627025";  
protein\_coding"; old "TCONS\_00627025";  
protein\_coding"; old "TCONS\_00627025";  
protein\_coding"; old "TCONS\_00627025";



protein\_coding"; old "TCONS\_00627943";  
protein\_coding"; old "TCONS\_00621659";  
protein\_coding"; old "TCONS\_00621659";  
protein\_coding"; old "TCONS\_00621659";  
protein\_coding"; old "TCONS\_00621659";  
protein\_coding"; old "TCONS\_00621830";  
protein\_coding"; old "TCONS\_00621830";  
protein\_coding"; old "TCONS\_00628100";  
protein\_coding"; old "TCONS\_00628100";  
protein\_coding"; old "TCONS\_00628100";  
protein\_coding"; old "TCONS\_00628100";  
protein\_coding"; old "TCONS\_00625031";  
protein\_coding"; old "TCONS\_00621841";  
protein\_coding"; old "TCONS\_00625039";  
protein\_coding"; old "TCONS\_00625039";  
protein\_coding"; old "TCONS\_00625041";  
protein\_coding"; old "TCONS\_00625041";  
protein\_coding"; old "TCONS\_00625041";  
protein\_coding"; old "TCONS\_00625041";  
protein\_coding"; old "TCONS\_00633500";  
protein\_coding"; old "TCONS\_00633500";  
protein\_coding"; old "TCONS\_00633502";  
protein\_coding"; old "TCONS\_00633502";  
protein\_coding"; old "TCONS\_00633502";  
protein\_coding"; old "TCONS\_00633502";  
protein\_coding"; old "TCONS\_00631414";

protein\_coding"; old "TCONS\_00631414";  
protein\_coding"; old "TCONS\_00631414";  
protein\_coding"; old "TCONS\_00631414";  
protein\_coding"; old "TCONS\_00631414";  
protein\_coding"; old "TCONS\_00631414";  
protein\_coding"; old "TCONS\_00631414";  
protein\_coding"; old "TCONS\_00631414";  
protein\_coding"; old "TCONS\_00621859";  
protein\_coding"; old "TCONS\_00621859";  
protein\_coding"; old "TCONS\_00631431";  
protein\_coding"; old "TCONS\_00631431";  
protein\_coding"; old "TCONS\_00621904";  
protein\_coding"; old "TCONS\_00621904";  
protein\_coding"; old "TCONS\_00628192";  
protein\_coding"; old "TCONS\_00628192";  
protein\_coding"; old "TCONS\_00621954";  
protein\_coding"; old "TCONS\_00625138";  
protein\_coding"; old "TCONS\_00625139";  
protein\_coding"; old "TCONS\_00621957";  
protein\_coding"; old "TCONS\_00621957";  
protein\_coding"; old "TCONS\_00621957";  
protein\_coding"; old "TCONS\_00621957";



protein\_coding"; old "TCONS\_00621957";  
protein\_coding"; old "TCONS\_00625306";  
protein\_coding"; old "TCONS\_00625306";  
protein\_coding"; old "TCONS\_00633657";  
protein\_coding"; old "TCONS\_00633657";  
protein\_coding"; old "TCONS\_00633657";  
protein\_coding"; old "TCONS\_00622173";  
protein\_coding"; old "TCONS\_00622173";  
protein\_coding"; old "TCONS\_00622173";  
protein\_coding"; old "TCONS\_00622186";  
protein\_coding"; old "TCONS\_00622186";  
protein\_coding"; old "TCONS\_00625334";  
protein\_coding"; old "TCONS\_00625334";  
protein\_coding"; old "TCONS\_00625334";  
protein\_coding"; old "TCONS\_00625334";  
protein\_coding"; old "TCONS\_00622257";  
protein\_coding"; old "TCONS\_00622257";  
protein\_coding"; old "TCONS\_00631920";  
protein\_coding"; old "TCONS\_00622811";  
protein\_coding"; old "TCONS\_00625852";  
protein\_coding"; old "TCONS\_00625852";  
protein\_coding"; old "TCONS\_00625933";  
protein\_coding"; old "TCONS\_00625933";  
protein\_coding"; old "TCONS\_00636046";  
protein\_coding"; old "TCONS\_00636046";  
protein\_coding"; old "TCONS\_00636046";  
protein\_coding"; old "TCONS\_00629356";  
protein\_coding"; old "TCONS\_00629356";  
protein\_coding"; old "TCONS\_00629356";  
protein\_coding"; old "TCONS\_00629356";  
protein\_coding"; old "TCONS\_00623066";



protein\_coding"; old "TCONS\_00629932";  
protein\_coding"; old "TCONS\_00623536";  
protein\_coding"; old "TCONS\_00623536";  
protein\_coding"; old "TCONS\_00623536";  
protein\_coding"; old "TCONS\_00629957";  
protein\_coding"; old "TCONS\_00626409";  
protein\_coding"; old "TCONS\_00626409";  
protein\_coding"; old "TCONS\_00626409";  
protein\_coding"; old "TCONS\_00623554";  
protein\_coding"; old "TCONS\_00623554";  
protein\_coding"; old "TCONS\_00626492";  
protein\_coding"; old "TCONS\_00630100";  
protein\_coding"; old "TCONS\_00630100";  
protein\_coding"; old "TCONS\_00630100";  
protein\_coding"; old "TCONS\_00623743";  
protein\_coding"; old "TCONS\_00623743";  
protein\_coding"; old "TCONS\_00626631";  
protein\_coding"; old "TCONS\_00623778";  
protein\_coding"; old "TCONS\_00623778";  
protein\_coding"; old "TCONS\_00623778";  
protein\_coding"; old "TCONS\_00623778";

protein\_coding"; old "TCONS\_00623778";  
protein\_coding"; old "TCONS\_00623778";  
protein\_coding"; old "TCONS\_00623781";  
protein\_coding"; old "TCONS\_00638515";  
protein\_coding"; old "TCONS\_00623782";  
protein\_coding"; old "TCONS\_00623783";  
protein\_coding"; old "TCONS\_00623783";  
protein\_coding"; old "TCONS\_00623783";  
protein\_coding"; old "TCONS\_00630229";  
protein\_coding"; old "TCONS\_00630229";  
protein\_coding"; old "TCONS\_00623789";  
protein\_coding"; old "TCONS\_00623789";  
protein\_coding"; old "TCONS\_00623788";  
protein\_coding"; old "TCONS\_00623788";  
protein\_coding"; old "TCONS\_00623790";  
protein\_coding"; old "TCONS\_00623790";  
protein\_coding"; old "TCONS\_00626656";  
protein\_coding"; old "TCONS\_00623812";  
protein\_coding"; old "TCONS\_00623812";  
protein\_coding"; old "TCONS\_00623812";

protein\_coding"; old "TCONS\_00623812";  
protein\_coding"; old "TCONS\_00626660";  
protein\_coding"; old "TCONS\_00626660";  
protein\_coding"; old "TCONS\_00626660";  
protein\_coding"; old "TCONS\_00626660";  
protein\_coding"; old "TCONS\_00623816";  
protein\_coding"; old "TCONS\_00623816";  
protein\_coding"; old "TCONS\_00623816";  
protein\_coding"; old "TCONS\_00623814";  
protein\_coding"; old "TCONS\_00623814";  
protein\_coding"; old "TCONS\_00626661";  
protein\_coding"; old "TCONS\_00626661";  
protein\_coding"; old "TCONS\_00626661";  
protein\_coding"; old "TCONS\_00623831";  
protein\_coding"; old "TCONS\_00623831";  
protein\_coding"; old "TCONS\_00623831";  
protein\_coding"; old "TCONS\_00624016";  
protein\_coding"; old "TCONS\_00624026";  
protein\_coding"; old "TCONS\_00624026";  
protein\_coding"; old "TCONS\_00632802";  
protein\_coding"; old "TCONS\_00642177";  
protein\_coding"; old "TCONS\_00642178";  
protein\_coding"; old "TCONS\_00644704";  
protein\_coding"; old "TCONS\_00644704";  
protein\_coding"; old "TCONS\_00651319";  
protein\_coding"; old "TCONS\_00651319";  
protein\_coding"; old "TCONS\_00644737";  
protein\_coding"; old "TCONS\_00644737";



protein\_coding"; old "TCONS\_00649794";  
protein\_coding"; old "TCONS\_00644831";  
protein\_coding"; old "TCONS\_00642405";  
protein\_coding"; old "TCONS\_00642405";  
protein\_coding"; old "TCONS\_00642405";  
protein\_coding"; old "TCONS\_00642404";  
protein\_coding"; old "TCONS\_00642404";  
protein\_coding"; old "TCONS\_00642404";  
protein\_coding"; old "TCONS\_00644893";  
protein\_coding"; old "TCONS\_00644893";  
protein\_coding"; old "TCONS\_00644947";  
protein\_coding"; old "TCONS\_00644947";  
protein\_coding"; old "TCONS\_00644947";  
protein\_coding"; old "TCONS\_00652934";  
protein\_coding"; old "TCONS\_00652934";  
protein\_coding"; old "TCONS\_00652934";  
protein\_coding"; old "TCONS\_00649880";  
protein\_coding"; old "TCONS\_00649880";  
protein\_coding"; old "TCONS\_00649880";  
protein\_coding"; old "TCONS\_00652947";  
protein\_coding"; old "TCONS\_00642504";  
protein\_coding"; old "TCONS\_00642504";  
protein\_coding"; old "TCONS\_00642504";  
protein\_coding"; old "TCONS\_00642502";  
protein\_coding"; old "TCONS\_00642502";  
protein\_coding"; old "TCONS\_00642505";  
protein\_coding"; old "TCONS\_00642505";









protein\_coding"; old "TCONS\_00642838";  
protein\_coding"; old "TCONS\_00642838";  
protein\_coding"; old "TCONS\_00651702";  
protein\_coding"; old "TCONS\_00650143";  
protein\_coding"; old "TCONS\_00642858";  
protein\_coding"; old "TCONS\_00642858";  
protein\_coding"; old "TCONS\_00642866";  
protein\_coding"; old "TCONS\_00642887";  
protein\_coding"; old "TCONS\_00642887";  
protein\_coding"; old "TCONS\_00642887";  
protein\_coding"; old "TCONS\_00647756";  
protein\_coding"; old "TCONS\_00647756";  
protein\_coding"; old "TCONS\_00647756";  
protein\_coding"; old "TCONS\_00647756";  
protein\_coding"; old "TCONS\_00642926";  
protein\_coding"; old "TCONS\_00642926";  
protein\_coding"; old "TCONS\_00642924";  
protein\_coding"; old "TCONS\_00642924";  
protein\_coding"; old "TCONS\_00650357";  
protein\_coding"; old "TCONS\_00650357";  
protein\_coding"; old "TCONS\_00648124";  
protein\_coding"; old "TCONS\_00643407";  
protein\_coding"; old "TCONS\_00643407";  
protein\_coding"; old "TCONS\_00643407";  
protein\_coding"; old "TCONS\_00643407";  
protein\_coding"; old "TCONS\_00643406";  
protein\_coding"; old "TCONS\_00643406";  
protein\_coding"; old "TCONS\_00643406";  
protein\_coding"; old "TCONS\_00643406";  
protein\_coding"; old "TCONS\_00643498";

protein\_coding"; old "TCONS\_00643507";  
protein\_coding"; old "TCONS\_00643514";  
protein\_coding"; old "TCONS\_00643518";  
protein\_coding"; old "TCONS\_00643518";  
protein\_coding"; old "TCONS\_00643518";  
protein\_coding"; old "TCONS\_00646009";  
protein\_coding"; old "TCONS\_00646009";  
protein\_coding"; old "TCONS\_00646009";  
protein\_coding"; old "TCONS\_00652161";  
protein\_coding"; old "TCONS\_00652161";  
protein\_coding"; old "TCONS\_00643872";  
protein\_coding"; old "TCONS\_00653801";  
protein\_coding"; old "TCONS\_00653801";  
protein\_coding"; old "TCONS\_00653801";  
protein\_coding"; old "TCONS\_00653801";  
protein\_coding"; old "TCONS\_00646151";  
protein\_coding"; old "TCONS\_00646151";  
protein\_coding"; old "TCONS\_00646151";  
protein\_coding"; old "TCONS\_00646151";  
protein\_coding"; old "TCONS\_00643992";  
protein\_coding"; old "TCONS\_00643992";  
protein\_coding"; old "TCONS\_00643990";  
protein\_coding"; old "TCONS\_00643990";  
protein\_coding"; old "TCONS\_00643990";  
protein\_coding"; old "TCONS\_00644064";  
protein\_coding"; old "TCONS\_00644067";  
protein\_coding"; old "TCONS\_00644067";  
protein\_coding"; old "TCONS\_00646342";  
protein\_coding"; old "TCONS\_00646342";  
protein\_coding"; old "TCONS\_00646342";



protein\_coding"; old "TCONS\_00646510";  
protein\_coding"; old "TCONS\_00646510";  
protein\_coding"; old "TCONS\_00646510";  
"protein\_coding"; old "TCONS\_00646510";  
"protein\_coding"; old "TCONS\_00646510";  
"protein\_coding"; old "TCONS\_00646510";  
protein\_coding"; old "TCONS\_00649331";  
protein\_coding"; old "TCONS\_00649331";  
protein\_coding"; old "TCONS\_00646589";  
protein\_coding"; old "TCONS\_00646589";  
protein\_coding"; old "TCONS\_00646589";  
protein\_coding"; old "TCONS\_00646589";  
protein\_coding"; old "TCONS\_00651203";  
protein\_coding"; old "TCONS\_00651203";  
protein\_coding"; old "TCONS\_00687506";  
protein\_coding"; old "TCONS\_00687506";  
protein\_coding"; old "TCONS\_00687506";  
protein\_coding"; old "TCONS\_00678762";  
protein\_coding"; old "TCONS\_00658616";  
protein\_coding"; old "TCONS\_00658616";  
protein\_coding"; old "TCONS\_00658616";  
protein\_coding"; old "TCONS\_00658647";  
protein\_coding"; old "TCONS\_00658703";  
protein\_coding"; old "TCONS\_00659009";  
protein\_coding"; old "TCONS\_00659009";  
protein\_coding"; old "TCONS\_00659009";  
protein\_coding"; old "TCONS\_00659023";  
protein\_coding"; old "TCONS\_00659023";  
protein\_coding"; old "TCONS\_00659023";  
protein\_coding"; old "TCONS\_00659023";  
protein\_coding"; old "TCONS\_00659023";



protein\_coding"; old "TCONS\_00692452";  
protein\_coding"; old "TCONS\_00692452";  
protein\_coding"; old "TCONS\_00692452";  
"protein\_coding"; old "TCONS\_00692452";  
protein\_coding"; old "TCONS\_00659646";  
protein\_coding"; old "TCONS\_00659646";  
protein\_coding"; old "TCONS\_00666759";  
protein\_coding"; old "TCONS\_00666759";  
protein\_coding"; old "TCONS\_00672944";  
protein\_coding"; old "TCONS\_00672944";  
protein\_coding"; old "TCONS\_00660007";  
protein\_coding"; old "TCONS\_00660007";  
protein\_coding"; old "TCONS\_00660264";  
protein\_coding"; old "TCONS\_00660264";  
protein\_coding"; old "TCONS\_00660389";  
protein\_coding"; old "TCONS\_00660389";  
protein\_coding"; old "TCONS\_00660389";  
protein\_coding"; old "TCONS\_00667192";  
protein\_coding"; old "TCONS\_00660404";  
protein\_coding"; old "TCONS\_00660404";  
protein\_coding"; old "TCONS\_00660407";  
protein\_coding"; old "TCONS\_00660407";  
protein\_coding"; old "TCONS\_00673414";  
protein\_coding"; old "TCONS\_00673414";  
protein\_coding"; old "TCONS\_00673414";  
protein\_coding"; old "TCONS\_00673414";  
protein\_coding"; old "TCONS\_00660416";  
protein\_coding"; old "TCONS\_00660416";  
protein\_coding"; old "TCONS\_00660416";  
protein\_coding"; old "TCONS\_00660428";  
protein\_coding"; old "TCONS\_00660428";



protein\_coding"; old "TCONS\_00660626";  
protein\_coding"; old "TCONS\_00660626";  
protein\_coding"; old "TCONS\_00680231";  
"protein\_coding"; old "TCONS\_00680231";  
"protein\_coding"; old "TCONS\_00680231";  
protein\_coding"; old "TCONS\_00660672";  
"protein\_coding"; old "TCONS\_00660672";  
protein\_coding"; old "TCONS\_00680283";  
protein\_coding"; old "TCONS\_00680283";  
protein\_coding"; old "TCONS\_00660928";  
protein\_coding"; old "TCONS\_00660928";  
protein\_coding"; old "TCONS\_00660976";  
protein\_coding"; old "TCONS\_00660976";



protein\_coding"; old "TCONS\_00661237";  
protein\_coding"; old "TCONS\_00661237";  
protein\_coding"; old "TCONS\_00661237";  
protein\_coding"; old "TCONS\_00667982";  
protein\_coding"; old "TCONS\_00667982";  
protein\_coding"; old "TCONS\_00661445";  
protein\_coding"; old "TCONS\_00661445";  
protein\_coding"; old "TCONS\_00661445";  
protein\_coding"; old "TCONS\_00674681";  
protein\_coding"; old "TCONS\_00674681";  
protein\_coding"; old "TCONS\_00674681";  
protein\_coding"; old "TCONS\_00674681";  
protein\_coding"; old "TCONS\_00668217";  
protein\_coding"; old "TCONS\_00661680";  
protein\_coding"; old "TCONS\_00661680";  
protein\_coding"; old "TCONS\_00681153";  
protein\_coding"; old "TCONS\_00681153";  
protein\_coding"; old "TCONS\_00662077";  
protein\_coding"; old "TCONS\_00662077";  
protein\_coding"; old "TCONS\_00662077";  
protein\_coding"; old "TCONS\_00662077";  
protein\_coding"; old "TCONS\_00662076";  
protein\_coding"; old "TCONS\_00662076";  
protein\_coding"; old "TCONS\_00662076";  
protein\_coding"; old "TCONS\_00662076";  
protein\_coding"; old "TCONS\_00662082";  
protein\_coding"; old "TCONS\_00662082";  
protein\_coding"; old "TCONS\_00662082";  
protein\_coding"; old "TCONS\_00662082";  
protein\_coding"; old "TCONS\_00662109";  
protein\_coding"; old "TCONS\_00675377";

protein\_coding"; old "TCONS\_00675377";  
protein\_coding"; old "TCONS\_00675377";  
protein\_coding"; old "TCONS\_00668707";  
protein\_coding"; old "TCONS\_00668707";  
protein\_coding"; old "TCONS\_00681251";  
"protein\_coding"; old "TCONS\_00681251";  
protein\_coding"; old "TCONS\_00668769";  
"protein\_coding"; old "TCONS\_00668769";  
"protein\_coding"; old "TCONS\_00668769";  
"protein\_coding"; old "TCONS\_00668769";  
protein\_coding"; old "TCONS\_00662853";  
protein\_coding"; old "TCONS\_00662853";  
protein\_coding"; old "TCONS\_00662853";  
protein\_coding"; old "TCONS\_00662853";  
protein\_coding"; old "TCONS\_00662853";



protein\_coding"; old "TCONS\_00663396";  
protein\_coding"; old "TCONS\_00663396";  
protein\_coding"; old "TCONS\_00663396";  
protein\_coding"; old "TCONS\_00663396";  
protein\_coding"; old "TCONS\_00690704";  
protein\_coding"; old "TCONS\_00690704";  
protein\_coding"; old "TCONS\_00663792";  
protein\_coding"; old "TCONS\_00670087";  
protein\_coding"; old "TCONS\_00670087";  
protein\_coding"; old "TCONS\_00663972";  
protein\_coding"; old "TCONS\_00690899";  
protein\_coding"; old "TCONS\_00690899";  
protein\_coding"; old "TCONS\_00690899";  
protein\_coding"; old "TCONS\_00690899";  
protein\_coding"; old "TCONS\_00677122";  
protein\_coding"; old "TCONS\_00664104";  
protein\_coding"; old "TCONS\_00664104";  
protein\_coding"; old "TCONS\_00664353";  
protein\_coding"; old "TCONS\_00664353";  
protein\_coding"; old "TCONS\_00670589";  
protein\_coding"; old "TCONS\_00670589";  
protein\_coding"; old "TCONS\_00664479";  
protein\_coding"; old "TCONS\_00664479";  
protein\_coding"; old "TCONS\_00691229";  
protein\_coding"; old "TCONS\_00691229";







protein\_coding"; old "TCONS\_00664787";  
protein\_coding"; old "TCONS\_00678032";  
protein\_coding"; old "TCONS\_00678032";  
protein\_coding"; old "TCONS\_00664972";  
protein\_coding"; old "TCONS\_00664972";  
protein\_coding"; old "TCONS\_00671186";  
protein\_coding"; old "TCONS\_00671186";  
protein\_coding"; old "TCONS\_00671186";  
protein\_coding"; old "TCONS\_00678285";  
protein\_coding"; old "TCONS\_00678285";  
protein\_coding"; old "TCONS\_00665161";  
protein\_coding"; old "TCONS\_00665161";  
protein\_coding"; old "TCONS\_00665161";  
protein\_coding"; old "TCONS\_00723513";  
protein\_coding"; old "TCONS\_00723513";  
protein\_coding"; old "TCONS\_00723513";  
protein\_coding"; old "TCONS\_00719702";  
protein\_coding"; old "TCONS\_00719702";  
protein\_coding"; old "TCONS\_00719720";  
protein\_coding"; old "TCONS\_00719720";  
protein\_coding"; old "TCONS\_00719720";  
protein\_coding"; old "TCONS\_00703214";  
protein\_coding"; old "TCONS\_00703214";  
protein\_coding"; old "TCONS\_00703214";  
protein\_coding"; old "TCONS\_00703214";  
protein\_coding"; old "TCONS\_00703215";  
protein\_coding"; old "TCONS\_00703215";  
protein\_coding"; old "TCONS\_00703215";  
protein\_coding"; old "TCONS\_00703215";  
protein\_coding"; old "TCONS\_00703292";  
protein\_coding"; old "TCONS\_00703292";  
protein\_coding"; old "TCONS\_00703299";  
protein\_coding"; old "TCONS\_00703299";  
protein\_coding"; old "TCONS\_00703349";  
protein\_coding"; old "TCONS\_00703349";



protein\_coding"; old "TCONS\_00704198";  
protein\_coding"; old "TCONS\_00704197";  
protein\_coding"; old "TCONS\_00724077";  
protein\_coding"; old "TCONS\_00724077";  
protein\_coding"; old "TCONS\_00724077";  
protein\_coding"; old "TCONS\_00724076";  
protein\_coding"; old "TCONS\_00709901";  
protein\_coding"; old "TCONS\_00709901";  
protein\_coding"; old "TCONS\_00709901";  
protein\_coding"; old "TCONS\_00727736";  
protein\_coding"; old "TCONS\_00727736";  
protein\_coding"; old "TCONS\_00727736";  
protein\_coding"; old "TCONS\_00710083";  
protein\_coding"; old "TCONS\_00710083";  
protein\_coding"; old "TCONS\_00710083";  
protein\_coding"; old "TCONS\_00704652";  
protein\_coding"; old "TCONS\_00704652";  
protein\_coding"; old "TCONS\_00710259";  
protein\_coding"; old "TCONS\_00720693";  
protein\_coding"; old "TCONS\_00720693";  
protein\_coding"; old "TCONS\_00720693";  
protein\_coding"; old "TCONS\_00720693";

protein\_coding"; old "TCONS\_00720693";  
protein\_coding"; old "TCONS\_00704707";  
protein\_coding"; old "TCONS\_00715305";  
protein\_coding"; old "TCONS\_00715305";  
protein\_coding"; old "TCONS\_00715305";  
protein\_coding"; old "TCONS\_00715305";  
protein\_coding"; old "TCONS\_00710263";  
protein\_coding"; old "TCONS\_00710263";  
protein\_coding"; old "TCONS\_00715365";  
protein\_coding"; old "TCONS\_00715365";  
protein\_coding"; old "TCONS\_00720736";  
protein\_coding"; old "TCONS\_00720737";  
protein\_coding"; old "TCONS\_00720737";  
protein\_coding"; old "TCONS\_00720737";  
protein\_coding"; old "TCONS\_00705190";  
protein\_coding"; old "TCONS\_00705316";  
protein\_coding"; old "TCONS\_00721103";  
protein\_coding"; old "TCONS\_00721103";  
protein\_coding"; old "TCONS\_00721103";  
protein\_coding"; old "TCONS\_00721103";

protein\_coding"; old "TCONS\_00721103";  
protein\_coding"; old "TCONS\_00705318";  
protein\_coding"; old "TCONS\_00705318";  
protein\_coding"; old "TCONS\_00705332";  
protein\_coding"; old "TCONS\_00705332";  
protein\_coding"; old "TCONS\_00705338";  
protein\_coding"; old "TCONS\_00705339";  
protein\_coding"; old "TCONS\_00705339";  
protein\_coding"; old "TCONS\_00705339";  
protein\_coding"; old "TCONS\_00705340";  
protein\_coding"; old "TCONS\_00705340";  
protein\_coding"; old "TCONS\_00721113";  
protein\_coding"; old "TCONS\_00716213";  
protein\_coding"; old "TCONS\_00716213";  
protein\_coding"; old "TCONS\_00716368";  
protein\_coding"; old "TCONS\_00716368";  
protein\_coding"; old "TCONS\_00711128";  
protein\_coding"; old "TCONS\_00716410";  
protein\_coding"; old "TCONS\_00716410";  
protein\_coding"; old "TCONS\_00716410";

protein\_coding"; old "TCONS\_00716410";  
protein\_coding"; old "TCONS\_00716410";  
protein\_coding"; old "TCONS\_00725004";  
protein\_coding"; old "TCONS\_00705749";  
protein\_coding"; old "TCONS\_00705749";  
protein\_coding"; old "TCONS\_00705749";  
protein\_coding"; old "TCONS\_00716521";  
protein\_coding"; old "TCONS\_00716521";  
protein\_coding"; old "TCONS\_00711225";  
protein\_coding"; old "TCONS\_00711225";  
protein\_coding"; old "TCONS\_00716787";  
protein\_coding"; old "TCONS\_00706087";  
protein\_coding"; old "TCONS\_00716788";  
protein\_coding"; old "TCONS\_00716788";  
protein\_coding"; old "TCONS\_00716788";

protein\_coding"; old "TCONS\_00716788";  
protein\_coding"; old "TCONS\_00716788";  
protein\_coding"; old "TCONS\_00716788";  
protein\_coding"; old "TCONS\_00716788";  
protein\_coding"; old "TCONS\_00716788";  
protein\_coding"; old "TCONS\_00716788";  
"protein\_coding"; old "TCONS\_00716788";  
protein\_coding"; old "TCONS\_00706112";  
protein\_coding"; old "TCONS\_00706112";  
protein\_coding"; old "TCONS\_00706140";  
protein\_coding"; old "TCONS\_00706140";  
protein\_coding"; old "TCONS\_00706140";  
protein\_coding"; old "TCONS\_00711536";  
protein\_coding"; old "TCONS\_00711551";  
protein\_coding"; old "TCONS\_00711551";  
protein\_coding"; old "TCONS\_00711551";  
protein\_coding"; old "TCONS\_00716928";  
protein\_coding"; old "TCONS\_00716928";  
protein\_coding"; old "TCONS\_00732234";  
protein\_coding"; old "TCONS\_00706422";  
protein\_coding"; old "TCONS\_00706422";  
protein\_coding"; old "TCONS\_00706422";  
protein\_coding"; old "TCONS\_00706421";  
protein\_coding"; old "TCONS\_00706421";  
protein\_coding"; old "TCONS\_00706421";  
protein\_coding"; old "TCONS\_00706421";  
protein\_coding"; old "TCONS\_00717198";  
protein\_coding"; old "TCONS\_00717198";  
protein\_coding"; old "TCONS\_00717198";  
protein\_coding"; old "TCONS\_00717198";

protein\_coding"; old "TCONS\_00717198";  
protein\_coding"; old "TCONS\_00717261";  
protein\_coding"; old "TCONS\_00717261";  
protein\_coding"; old "TCONS\_00717261";  
protein\_coding"; old "TCONS\_00717261";  
protein\_coding"; old "TCONS\_00706577";  
protein\_coding"; old "TCONS\_00706577";  
protein\_coding"; old "TCONS\_00706577";  
protein\_coding"; old "TCONS\_00718071";  
protein\_coding"; old "TCONS\_00718071";  
protein\_coding"; old "TCONS\_00707695";  
protein\_coding"; old "TCONS\_00707695";  
protein\_coding"; old "TCONS\_00718240";  
protein\_coding"; old "TCONS\_00707753";  
protein\_coding"; old "TCONS\_00707753";  
protein\_coding"; old "TCONS\_00707924";  
protein\_coding"; old "TCONS\_00707924";  
protein\_coding"; old "TCONS\_00708040";  
protein\_coding"; old "TCONS\_00713210";  
protein\_coding"; old "TCONS\_00713210";  
protein\_coding"; old "TCONS\_00713271";  
protein\_coding"; old "TCONS\_00708358";  
protein\_coding"; old "TCONS\_00708358";  
protein\_coding"; old "TCONS\_00708358";  
protein\_coding"; old "TCONS\_00708358";  
protein\_coding"; old "TCONS\_00713358";  
protein\_coding"; old "TCONS\_00713358";  
protein\_coding"; old "TCONS\_00713358";  
protein\_coding"; old "TCONS\_00713358";  
protein\_coding"; old "TCONS\_00723169";



protein\_coding"; old "TCONS\_00723169";  
protein\_coding"; old "TCONS\_00723169";  
protein\_coding"; old "TCONS\_00723169";  
protein\_coding"; old "TCONS\_00723167";  
protein\_coding"; old "TCONS\_00723167";  
protein\_coding"; old "TCONS\_00723167";  
protein\_coding"; old "TCONS\_00708551";  
protein\_coding"; old "TCONS\_00708551";  
protein\_coding"; old "TCONS\_00713480";  
protein\_coding"; old "TCONS\_00713480";  
protein\_coding"; old "TCONS\_00713480";  
protein\_coding"; old "TCONS\_00719049";  
protein\_coding"; old "TCONS\_00719049";  
protein\_coding"; old "TCONS\_00719049";  
protein\_coding"; old "TCONS\_00719049";  
protein\_coding"; old "TCONS\_00708577";  
protein\_coding"; old "TCONS\_00708577";  
protein\_coding"; old "TCONS\_00708577";  
protein\_coding"; old "TCONS\_00708577";  
protein\_coding"; old "TCONS\_00723186";  
protein\_coding"; old "TCONS\_00723186";  
protein\_coding"; old "TCONS\_00723186";  
protein\_coding"; old "TCONS\_00723186";  
protein\_coding"; old "TCONS\_00713513";  
protein\_coding"; old "TCONS\_00713513";  
protein\_coding"; old "TCONS\_00713541";  
protein\_coding"; old "TCONS\_00708647";  
protein\_coding"; old "TCONS\_00708647";  
protein\_coding"; old "TCONS\_00713604";  
protein\_coding"; old "TCONS\_00713645";  
protein\_coding"; old "TCONS\_00708713";

protein\_coding"; old "TCONS\_00708713";  
protein\_coding"; old "TCONS\_00726719";  
protein\_coding"; old "TCONS\_00726719";  
protein\_coding"; old "TCONS\_00723293";  
protein\_coding"; old "TCONS\_00723293";  
protein\_coding"; old "TCONS\_00719411";  
protein\_coding"; old "TCONS\_00708834";  
protein\_coding"; old "TCONS\_00708834";  
protein\_coding"; old "TCONS\_00719459";  
protein\_coding"; old "TCONS\_00719459";  
protein\_coding"; old "TCONS\_00719459";  
protein\_coding"; old "TCONS\_00713827";  
protein\_coding"; old "TCONS\_00713827";  
protein\_coding"; old "TCONS\_00713827";  
protein\_coding"; old "TCONS\_00708908";  
protein\_coding"; old "TCONS\_00708908";  
protein\_coding"; old "TCONS\_00751268";  
protein\_coding"; old "TCONS\_00751268";  
protein\_coding"; old "TCONS\_00751268";  
protein\_coding"; old "TCONS\_00739828";  
protein\_coding"; old "TCONS\_00739828";  
protein\_coding"; old "TCONS\_00739828";  
protein\_coding"; old "TCONS\_00739828";  
protein\_coding"; old "TCONS\_00746251";  
protein\_coding"; old "TCONS\_00746251";  
protein\_coding"; old "TCONS\_00739919";  
protein\_coding"; old "TCONS\_00746313";  
protein\_coding"; old "TCONS\_00746313";  
protein\_coding"; old "TCONS\_00739954";  
protein\_coding"; old "TCONS\_00739954";



protein\_coding"; old "TCONS\_00739990";  
protein\_coding"; old "TCONS\_00746369";  
protein\_coding"; old "TCONS\_00746369";  
protein\_coding"; old "TCONS\_00746369";  
protein\_coding"; old "TCONS\_00746370";  
protein\_coding"; old "TCONS\_00746370";  
protein\_coding"; old "TCONS\_00746370";  
protein\_coding"; old "TCONS\_00746370";  
protein\_coding"; old "TCONS\_00746371";  
protein\_coding"; old "TCONS\_00746371";  
protein\_coding"; old "TCONS\_00746371";  
protein\_coding"; old "TCONS\_00746410";  
protein\_coding"; old "TCONS\_00757266";  
protein\_coding"; old "TCONS\_00757266";  
protein\_coding"; old "TCONS\_00757266";  
protein\_coding"; old "TCONS\_00757266";  
protein\_coding"; old "TCONS\_00757279";  
protein\_coding"; old "TCONS\_00757279";  
protein\_coding"; old "TCONS\_00761198";  
protein\_coding"; old "TCONS\_00761198";  
protein\_coding"; old "TCONS\_00761198";  
protein\_coding"; old "TCONS\_00761198";  
protein\_coding"; old "TCONS\_00740069";  
protein\_coding"; old "TCONS\_00740069";  
protein\_coding"; old "TCONS\_00740069";



protein\_coding"; old "TCONS\_00746517";  
protein\_coding"; old "TCONS\_00740171";  
protein\_coding"; old "TCONS\_00751589";  
protein\_coding"; old "TCONS\_00740174";  
protein\_coding"; old "TCONS\_00740174";  
protein\_coding"; old "TCONS\_00740174";  
protein\_coding"; old "TCONS\_00740180";  
protein\_coding"; old "TCONS\_00740180";  
protein\_coding"; old "TCONS\_00740180";  
protein\_coding"; old "TCONS\_00740180";  
protein\_coding"; old "TCONS\_00751592";  
protein\_coding"; old "TCONS\_00751592";  
protein\_coding"; old "TCONS\_00751592";  
protein\_coding"; old "TCONS\_00740183";  
protein\_coding"; old "TCONS\_00757355";  
protein\_coding"; old "TCONS\_00740189";  
protein\_coding"; old "TCONS\_00740189";  
protein\_coding"; old "TCONS\_00740189";  
protein\_coding"; old "TCONS\_00740198";  
protein\_coding"; old "TCONS\_00761269";  
protein\_coding"; old "TCONS\_00761269";  
protein\_coding"; old "TCONS\_00761269";  
protein\_coding"; old "TCONS\_00761269";  
protein\_coding"; old "TCONS\_00757374";  
protein\_coding"; old "TCONS\_00757374";



protein\_coding"; old "TCONS\_00746602";  
protein\_coding"; old "TCONS\_00746602";  
protein\_coding"; old "TCONS\_00746602";  
protein\_coding"; old "TCONS\_00746602";  
protein\_coding"; old "TCONS\_00757403";  
protein\_coding"; old "TCONS\_00740263";  
protein\_coding"; old "TCONS\_00740263";  
protein\_coding"; old "TCONS\_00740266";  
protein\_coding"; old "TCONS\_00740264";  
protein\_coding"; old "TCONS\_00740264";  
protein\_coding"; old "TCONS\_00740264";  
protein\_coding"; old "TCONS\_00740280";  
protein\_coding"; old "TCONS\_00740279";  
protein\_coding"; old "TCONS\_00751672";  
protein\_coding"; old "TCONS\_00751672";  
protein\_coding"; old "TCONS\_00751672";  
protein\_coding"; old "TCONS\_00751673";  
protein\_coding"; old "TCONS\_00751673";



protein\_coding"; old "TCONS\_00751673";  
protein\_coding"; old "TCONS\_00751673";  
protein\_coding"; old "TCONS\_00761322";  
protein\_coding"; old "TCONS\_00740293";  
protein\_coding"; old "TCONS\_00757417";  
protein\_coding"; old "TCONS\_00757417";  
protein\_coding"; old "TCONS\_00757417";  
protein\_coding"; old "TCONS\_00757417";  
protein\_coding"; old "TCONS\_00764954";  
protein\_coding"; old "TCONS\_00764954";  
protein\_coding"; old "TCONS\_00764954";  
protein\_coding"; old "TCONS\_00764954";  
protein\_coding"; old "TCONS\_00740301";  
protein\_coding"; old "TCONS\_00740301";  
protein\_coding"; old "TCONS\_00740307";  
protein\_coding"; old "TCONS\_00740307";  
protein\_coding"; old "TCONS\_00740307";  
protein\_coding"; old "TCONS\_00740309";  
protein\_coding"; old "TCONS\_00772182";  
protein\_coding"; old "TCONS\_00772182";  
protein\_coding"; old "TCONS\_00772182";

protein\_coding"; old "TCONS\_00772182";  
protein\_coding"; old "TCONS\_00740320";  
protein\_coding"; old "TCONS\_00740324";  
protein\_coding"; old "TCONS\_00740324";  
protein\_coding"; old "TCONS\_00740328";  
protein\_coding"; old "TCONS\_00740328";  
protein\_coding"; old "TCONS\_00740342";  
protein\_coding"; old "TCONS\_00740342";  
protein\_coding"; old "TCONS\_00772200";  
protein\_coding"; old "TCONS\_00772200";  
protein\_coding"; old "TCONS\_00772200";  
protein\_coding"; old "TCONS\_00761366";  
protein\_coding"; old "TCONS\_00761366";  
protein\_coding"; old "TCONS\_00761366";  
protein\_coding"; old "TCONS\_00761366";  
protein\_coding"; old "TCONS\_00746671";  
protein\_coding"; old "TCONS\_00746671";  
protein\_coding"; old "TCONS\_00746671";  
protein\_coding"; old "TCONS\_00746671";  
protein\_coding"; old "TCONS\_00746670";  
protein\_coding"; old "TCONS\_00746670";  
protein\_coding"; old "TCONS\_00746670";  
protein\_coding"; old "TCONS\_00746670";  
protein\_coding"; old "TCONS\_00761373";  
protein\_coding"; old "TCONS\_00761373";  
protein\_coding"; old "TCONS\_00757473";  
protein\_coding"; old "TCONS\_00757473";  
protein\_coding"; old "TCONS\_00757473";  
protein\_coding"; old "TCONS\_00757473";  
protein\_coding"; old "TCONS\_00740376";  
protein\_coding"; old "TCONS\_00740376";

protein\_coding"; old "TCONS\_00740376";  
protein\_coding"; old "TCONS\_00746673";  
protein\_coding"; old "TCONS\_00746673";  
protein\_coding"; old "TCONS\_00746673";  
protein\_coding"; old "TCONS\_00746673";  
protein\_coding"; old "TCONS\_00740385";  
protein\_coding"; old "TCONS\_00740385";  
protein\_coding"; old "TCONS\_00740385";  
protein\_coding"; old "TCONS\_00761372";  
protein\_coding"; old "TCONS\_00761372";  
protein\_coding"; old "TCONS\_00761372";  
protein\_coding"; old "TCONS\_00740408";  
protein\_coding"; old "TCONS\_00740408";  
protein\_coding"; old "TCONS\_00772232";  
protein\_coding"; old "TCONS\_00772232";  
protein\_coding"; old "TCONS\_00772232";  
protein\_coding"; old "TCONS\_00772232";  
protein\_coding"; old "TCONS\_00746696";  
protein\_coding"; old "TCONS\_00746696";  
protein\_coding"; old "TCONS\_00740418";  
protein\_coding"; old "TCONS\_00740418";  
protein\_coding"; old "TCONS\_00740420";  
protein\_coding"; old "TCONS\_00740420";  
protein\_coding"; old "TCONS\_00740420";  
protein\_coding"; old "TCONS\_00757511";  
protein\_coding"; old "TCONS\_00757511";  
protein\_coding"; old "TCONS\_00740439";  
protein\_coding"; old "TCONS\_00740439";  
protein\_coding"; old "TCONS\_00740440";  
protein\_coding"; old "TCONS\_00740440";  
protein\_coding"; old "TCONS\_00740440";  
protein\_coding"; old "TCONS\_00765022";  
protein\_coding"; old "TCONS\_00765022";  
protein\_coding"; old "TCONS\_00765022";  
protein\_coding"; old "TCONS\_00746719";

protein\_coding"; old "TCONS\_00746719";  
protein\_coding"; old "TCONS\_00746719";  
protein\_coding"; old "TCONS\_00746718";  
protein\_coding"; old "TCONS\_00746718";  
protein\_coding"; old "TCONS\_00757522";  
protein\_coding"; old "TCONS\_00757522";  
protein\_coding"; old "TCONS\_00740597";  
protein\_coding"; old "TCONS\_00740656";  
protein\_coding"; old "TCONS\_00740680";  
protein\_coding"; old "TCONS\_00740680";  
protein\_coding"; old "TCONS\_00740762";  
protein\_coding"; old "TCONS\_00740762";  
protein\_coding"; old "TCONS\_00740762";  
protein\_coding"; old "TCONS\_00740762";  
protein\_coding"; old "TCONS\_00752032";  
protein\_coding"; old "TCONS\_00752032";  
protein\_coding"; old "TCONS\_00752032";  
protein\_coding"; old "TCONS\_00757726";  
protein\_coding"; old "TCONS\_00757726";  
protein\_coding"; old "TCONS\_00740793";



protein\_coding"; old "TCONS\_00768901";  
protein\_coding"; old "TCONS\_00768901";  
protein\_coding"; old "TCONS\_00740851";  
protein\_coding"; old "TCONS\_00757769";  
protein\_coding"; old "TCONS\_00761621";  
protein\_coding"; old "TCONS\_00740852";  
protein\_coding"; old "TCONS\_00740872";  
protein\_coding"; old "TCONS\_00740872";  
protein\_coding"; old "TCONS\_00747104";  
protein\_coding"; old "TCONS\_00747104";  
protein\_coding"; old "TCONS\_00740949";



protein\_coding"; old "TCONS\_00758440";  
protein\_coding"; old "TCONS\_00758440";  
protein\_coding"; old "TCONS\_00758440";  
protein\_coding"; old "TCONS\_00742037";  
protein\_coding"; old "TCONS\_00765879";  
protein\_coding"; old "TCONS\_00765879";  
protein\_coding"; old "TCONS\_00765879";  
protein\_coding"; old "TCONS\_00762263";  
protein\_coding"; old "TCONS\_00762263";  
protein\_coding"; old "TCONS\_00762263";  
protein\_coding"; old "TCONS\_00762263";  
protein\_coding"; old "TCONS\_00753289";  
protein\_coding"; old "TCONS\_00753289";  
protein\_coding"; old "TCONS\_00748119";  
protein\_coding"; old "TCONS\_00748119";  
protein\_coding"; old "TCONS\_00748119";  
protein\_coding"; old "TCONS\_00758704";  
protein\_coding"; old "TCONS\_00753462";  
protein\_coding"; old "TCONS\_00766098";  
protein\_coding"; old "TCONS\_00766098";  
protein\_coding"; old "TCONS\_00766098";  
protein\_coding"; old "TCONS\_00766098";



protein\_coding"; old "TCONS\_00766098";  
protein\_coding"; old "TCONS\_00748256";  
protein\_coding"; old "TCONS\_00742389";  
protein\_coding"; old "TCONS\_00742389";  
protein\_coding"; old "TCONS\_00742389";  
protein\_coding"; old "TCONS\_00748257";  
protein\_coding"; old "TCONS\_00748257";  
protein\_coding"; old "TCONS\_00766167";  
protein\_coding"; old "TCONS\_00766167";  
protein\_coding"; old "TCONS\_00766167";  
protein\_coding"; old "TCONS\_00742482";  
protein\_coding"; old "TCONS\_00742482";  
protein\_coding"; old "TCONS\_00758777";  
protein\_coding"; old "TCONS\_00762554";  
protein\_coding"; old "TCONS\_00742646";  
protein\_coding"; old "TCONS\_00742646";  
protein\_coding"; old "TCONS\_00742646";  
protein\_coding"; old "TCONS\_00742646";  
protein\_coding"; old "TCONS\_00748546";  
protein\_coding"; old "TCONS\_00742752";  
protein\_coding"; old "TCONS\_00742752";



"protein\_coding"; old "TCONS\_00743160";  
"protein\_coding"; old "TCONS\_00743160";  
"protein\_coding"; old "TCONS\_00743160";  
protein\_coding"; old "TCONS\_00762905";  
"protein\_coding"; old "TCONS\_00762905";  
"protein\_coding"; old "TCONS\_00762905";  
protein\_coding"; old "TCONS\_00754400";  
protein\_coding"; old "TCONS\_00754400";  
protein\_coding"; old "TCONS\_00754432";  
protein\_coding"; old "TCONS\_00754432";  
protein\_coding"; old "TCONS\_00754432";  
protein\_coding"; old "TCONS\_00754432";  
protein\_coding"; old "TCONS\_00754451";  
protein\_coding"; old "TCONS\_00743373";  
protein\_coding"; old "TCONS\_00743373";  
protein\_coding"; old "TCONS\_00743441";  
protein\_coding"; old "TCONS\_00743441";  
protein\_coding"; old "TCONS\_00743440";  
protein\_coding"; old "TCONS\_00743440";  
protein\_coding"; old "TCONS\_00743440";  
protein\_coding"; old "TCONS\_00743440";  
protein\_coding"; old "TCONS\_00749105";  
protein\_coding"; old "TCONS\_00749105";  
protein\_coding"; old "TCONS\_00749105";

protein\_coding"; old "TCONS\_00749105";  
protein\_coding"; old "TCONS\_00749105";  
protein\_coding"; old "TCONS\_00749105";  
protein\_coding"; old "TCONS\_00749105";  
protein\_coding"; old "TCONS\_00749105";  
protein\_coding"; old "TCONS\_00759345";  
protein\_coding"; old "TCONS\_00759345";  
protein\_coding"; old "TCONS\_00759345";  
protein\_coding"; old "TCONS\_00743471";  
protein\_coding"; old "TCONS\_00743471";  
protein\_coding"; old "TCONS\_00759346";  
protein\_coding"; old "TCONS\_00759346";  
protein\_coding"; old "TCONS\_00759346";  
protein\_coding"; old "TCONS\_00743473";  
protein\_coding"; old "TCONS\_00743473";  
protein\_coding"; old "TCONS\_00743473";  
protein\_coding"; old "TCONS\_00743473";  
protein\_coding"; old "TCONS\_00743474";  
protein\_coding"; old "TCONS\_00749117";  
protein\_coding"; old "TCONS\_00749117";  
protein\_coding"; old "TCONS\_00749117";  
protein\_coding"; old "TCONS\_00754520";  
protein\_coding"; old "TCONS\_00743490";  
protein\_coding"; old "TCONS\_00743490";  
protein\_coding"; old "TCONS\_00754527";  
protein\_coding"; old "TCONS\_00754527";  
protein\_coding"; old "TCONS\_00754527";

protein\_coding"; old "TCONS\_00754527";  
protein\_coding"; old "TCONS\_00754527";  
protein\_coding"; old "TCONS\_00754527";  
protein\_coding"; old "TCONS\_00766741";  
protein\_coding"; old "TCONS\_00743496";  
protein\_coding"; old "TCONS\_00743496";  
protein\_coding"; old "TCONS\_00743507";  
protein\_coding"; old "TCONS\_00743507";  
protein\_coding"; old "TCONS\_00759382";  
protein\_coding"; old "TCONS\_00759382";  
protein\_coding"; old "TCONS\_00759382";  
protein\_coding"; old "TCONS\_00754560";  
protein\_coding"; old "TCONS\_00754561";  
protein\_coding"; old "TCONS\_00743541";  
protein\_coding"; old "TCONS\_00766781";  
protein\_coding"; old "TCONS\_00766781";  
protein\_coding"; old "TCONS\_00743615";  
protein\_coding"; old "TCONS\_00743615";  
protein\_coding"; old "TCONS\_00749238";  
protein\_coding"; old "TCONS\_00749238";  
protein\_coding"; old "TCONS\_00749238";  
protein\_coding"; old "TCONS\_00749238";



protein\_coding"; old "TCONS\_00763209";  
protein\_coding"; old "TCONS\_00763209";  
protein\_coding"; old "TCONS\_00749265";  
protein\_coding"; old "TCONS\_00759481";  
protein\_coding"; old "TCONS\_00759481";  
protein\_coding"; old "TCONS\_00759481";  
protein\_coding"; old "TCONS\_00759481";  
protein\_coding"; old "TCONS\_00743697";  
protein\_coding"; old "TCONS\_00743697";  
protein\_coding"; old "TCONS\_00743697";  
protein\_coding"; old "TCONS\_00743699";  
protein\_coding"; old "TCONS\_00749271";  
protein\_coding"; old "TCONS\_00749271";  
protein\_coding"; old "TCONS\_00749271";  
protein\_coding"; old "TCONS\_00749271";  
protein\_coding"; old "TCONS\_00749274";  
protein\_coding"; old "TCONS\_00749274";  
protein\_coding"; old "TCONS\_00743708";  
protein\_coding"; old "TCONS\_00743708";  
protein\_coding"; old "TCONS\_00743712";  
protein\_coding"; old "TCONS\_00743712";  
protein\_coding"; old "TCONS\_00754709";  
protein\_coding"; old "TCONS\_00754709";  
protein\_coding"; old "TCONS\_00754709";  
protein\_coding"; old "TCONS\_00743729";  
protein\_coding"; old "TCONS\_00754732";  
protein\_coding"; old "TCONS\_00754732";  
protein\_coding"; old "TCONS\_00754732";

protein\_coding"; old "TCONS\_00754732";  
protein\_coding"; old "TCONS\_00749305";  
protein\_coding"; old "TCONS\_00749305";  
protein\_coding"; old "TCONS\_00749305";  
protein\_coding"; old "TCONS\_00743754";  
protein\_coding"; old "TCONS\_00743754";  
protein\_coding"; old "TCONS\_00743760";  
protein\_coding"; old "TCONS\_00743942";  
protein\_coding"; old "TCONS\_00754883";  
protein\_coding"; old "TCONS\_00754883";  
protein\_coding"; old "TCONS\_00754883";  
protein\_coding"; old "TCONS\_00743944";  
protein\_coding"; old "TCONS\_00743944";  
protein\_coding"; old "TCONS\_00767109";  
protein\_coding"; old "TCONS\_00767109";  
protein\_coding"; old "TCONS\_00755058";  
protein\_coding"; old "TCONS\_00755058";  
protein\_coding"; old "TCONS\_00755058";  
protein\_coding"; old "TCONS\_00774088";  
protein\_coding"; old "TCONS\_00774088";  
protein\_coding"; old "TCONS\_00759762";  
protein\_coding"; old "TCONS\_00759762";  
protein\_coding"; old "TCONS\_00759762";  
protein\_coding"; old "TCONS\_00744151";  
protein\_coding"; old "TCONS\_00744151";  
protein\_coding"; old "TCONS\_00744160";  
protein\_coding"; old "TCONS\_00744163";  
protein\_coding"; old "TCONS\_00744163";  
protein\_coding"; old "TCONS\_00744163";









protein\_coding"; old "TCONS\_00750799";  
protein\_coding"; old "TCONS\_00750801";  
protein\_coding"; old "TCONS\_00750801";  
protein\_coding"; old "TCONS\_00756525";  
protein\_coding"; old "TCONS\_00745739";  
protein\_coding"; old "TCONS\_00768099";  
protein\_coding"; old "TCONS\_00750981";  
protein\_coding"; old "TCONS\_00750981";  
protein\_coding"; old "TCONS\_00750981";  
protein\_coding"; old "TCONS\_00745867";  
protein\_coding"; old "TCONS\_00745867";  
protein\_coding"; old "TCONS\_00750987";  
protein\_coding"; old "TCONS\_00750987";  
protein\_coding"; old "TCONS\_00750987";  
protein\_coding"; old "TCONS\_00751048";  
protein\_coding"; old "TCONS\_00751048";  
protein\_coding"; old "TCONS\_00751106";  
protein\_coding"; old "TCONS\_00746035";  
protein\_coding"; old "TCONS\_00746101";  
protein\_coding"; old "TCONS\_00746101";  
protein\_coding"; old "TCONS\_00746101";  
protein\_coding"; old "TCONS\_00771855";  
protein\_coding"; old "TCONS\_00771855";  
protein\_coding"; old "TCONS\_00746148";  
protein\_coding"; old "TCONS\_00746148";  
protein\_coding"; old "TCONS\_00746148";  
protein\_coding"; old "TCONS\_00746148";

protein\_coding"; old "TCONS\_00746147";  
protein\_coding"; old "TCONS\_00746147";  
protein\_coding"; old "TCONS\_00746147";  
protein\_coding"; old "TCONS\_00790459";  
protein\_coding"; old "TCONS\_00809354";  
protein\_coding"; old "TCONS\_00809354";  
protein\_coding"; old "TCONS\_00809354";  
protein\_coding"; old "TCONS\_00809354";  
protein\_coding"; old "TCONS\_00778268";  
protein\_coding"; old "TCONS\_00778647";  
protein\_coding"; old "TCONS\_00778647";  
protein\_coding"; old "TCONS\_00778768";  
protein\_coding"; old "TCONS\_00778768";  
protein\_coding"; old "TCONS\_00778768";  
protein\_coding"; old "TCONS\_00785515";  
protein\_coding"; old "TCONS\_00785515";  
protein\_coding"; old "TCONS\_00778852";  
protein\_coding"; old "TCONS\_00778852";  
protein\_coding"; old "TCONS\_00778852";  
protein\_coding"; old "TCONS\_00785586";  
protein\_coding"; old "TCONS\_00785586";  
protein\_coding"; old "TCONS\_00791356";  
protein\_coding"; old "TCONS\_00791356";  
protein\_coding"; old "TCONS\_00779003";  
protein\_coding"; old "TCONS\_00791457";  
protein\_coding"; old "TCONS\_00791457";  
protein\_coding"; old "TCONS\_00791457";  
protein\_coding"; old "TCONS\_00791457";



protein\_coding"; old "TCONS\_00806094";  
protein\_coding"; old "TCONS\_00786131";  
protein\_coding"; old "TCONS\_00786131";  
protein\_coding"; old "TCONS\_00779619";  
protein\_coding"; old "TCONS\_00779619";  
protein\_coding"; old "TCONS\_00792136";  
protein\_coding"; old "TCONS\_00792136";  
protein\_coding"; old "TCONS\_00792136";  
protein\_coding"; old "TCONS\_00786189";  
protein\_coding"; old "TCONS\_00792170";  
protein\_coding"; old "TCONS\_00792170";  
protein\_coding"; old "TCONS\_00797980";  
protein\_coding"; old "TCONS\_00779971";  
protein\_coding"; old "TCONS\_00779971";  
protein\_coding"; old "TCONS\_00786491";  
protein\_coding"; old "TCONS\_00786491";  
protein\_coding"; old "TCONS\_00786491";  
protein\_coding"; old "TCONS\_00779985";  
protein\_coding"; old "TCONS\_00779985";  
protein\_coding"; old "TCONS\_00779985";  
protein\_coding"; old "TCONS\_00779985";  
protein\_coding"; old "TCONS\_00780065";  
protein\_coding"; old "TCONS\_00780065";  
protein\_coding"; old "TCONS\_00802399";  
protein\_coding"; old "TCONS\_00802399";  
protein\_coding"; old "TCONS\_00802399";  
protein\_coding"; old "TCONS\_00802399";

protein\_coding"; old "TCONS\_00802399";  
protein\_coding"; old "TCONS\_00802399";  
protein\_coding"; old "TCONS\_00802399";  
protein\_coding"; old "TCONS\_00802399";  
protein\_coding"; old "TCONS\_00802399";  
"protein\_coding"; old "TCONS\_00802399";  
"protein\_coding"; old "TCONS\_00802399";  
"protein\_coding"; old "TCONS\_00802399";  
protein\_coding"; old "TCONS\_00792566";  
"protein\_coding"; old "TCONS\_00792566";  
"protein\_coding"; old "TCONS\_00792566";  
"protein\_coding"; old "TCONS\_00792566";  
"protein\_coding"; old "TCONS\_00792566";  
protein\_coding"; old "TCONS\_00780141";  
protein\_coding"; old "TCONS\_00780169";  
"protein\_coding"; old "TCONS\_00780169";  
"protein\_coding"; old "TCONS\_00780169";  
"protein\_coding"; old "TCONS\_00780169";  
"protein\_coding"; old "TCONS\_00780169";



"protein\_coding"; old "TCONS\_00780169";  
protein\_coding"; old "TCONS\_00792729";  
protein\_coding"; old "TCONS\_00792729";  
protein\_coding"; old "TCONS\_00792729";  
protein\_coding"; old "TCONS\_00792729";  
protein\_coding"; old "TCONS\_00780249";  
protein\_coding"; old "TCONS\_00780249";  
protein\_coding"; old "TCONS\_00780249";  
protein\_coding"; old "TCONS\_00780358";  
protein\_coding"; old "TCONS\_00780358";  
protein\_coding"; old "TCONS\_00780452";  
protein\_coding"; old "TCONS\_00780452";  
protein\_coding"; old "TCONS\_00780452";  
protein\_coding"; old "TCONS\_00792962";  
protein\_coding"; old "TCONS\_00792962";  
protein\_coding"; old "TCONS\_00792962";  
protein\_coding"; old "TCONS\_00798478";  
protein\_coding"; old "TCONS\_00780513";  
protein\_coding"; old "TCONS\_00780521";  
protein\_coding"; old "TCONS\_00780521";  
protein\_coding"; old "TCONS\_00780610";  
protein\_coding"; old "TCONS\_00787007";  
protein\_coding"; old "TCONS\_00780661";  
protein\_coding"; old "TCONS\_00780661";  
protein\_coding"; old "TCONS\_00780661";  
protein\_coding"; old "TCONS\_00780661";

protein\_coding"; old "TCONS\_00780661";  
protein\_coding"; old "TCONS\_00780661";  
protein\_coding"; old "TCONS\_00802720";  
protein\_coding"; old "TCONS\_00780693";  
protein\_coding"; old "TCONS\_00780693";  
protein\_coding"; old "TCONS\_00780695";  
protein\_coding"; old "TCONS\_00780695";  
protein\_coding"; old "TCONS\_00780695";  
protein\_coding"; old "TCONS\_00780795";  
protein\_coding"; old "TCONS\_00780795";  
protein\_coding"; old "TCONS\_00780795";  
protein\_coding"; old "TCONS\_00780795";  
protein\_coding"; old "TCONS\_00793181";  
protein\_coding"; old "TCONS\_00793181";  
protein\_coding"; old "TCONS\_00793181";  
protein\_coding"; old "TCONS\_00787211";  
protein\_coding"; old "TCONS\_00787211";  
protein\_coding"; old "TCONS\_00787211";  
protein\_coding"; old "TCONS\_00793256";  
protein\_coding"; old "TCONS\_00793256";  
protein\_coding"; old "TCONS\_00780922";  
protein\_coding"; old "TCONS\_00780922";  
protein\_coding"; old "TCONS\_00781095";  
protein\_coding"; old "TCONS\_00781095";  
protein\_coding"; old "TCONS\_00781296";  
protein\_coding"; old "TCONS\_00781296";  
protein\_coding"; old "TCONS\_00781296";  
protein\_coding"; old "TCONS\_00781296";  
protein\_coding"; old "TCONS\_00799002";  
protein\_coding"; old "TCONS\_00799002";  
protein\_coding"; old "TCONS\_00799002";

protein\_coding"; old "TCONS\_00799002";  
protein\_coding"; old "TCONS\_00781404";  
protein\_coding"; old "TCONS\_00781404";  
protein\_coding"; old "TCONS\_00787589";  
protein\_coding"; old "TCONS\_00787589";  
protein\_coding"; old "TCONS\_00781405";  
protein\_coding"; old "TCONS\_00793792";  
protein\_coding"; old "TCONS\_00781594";  
protein\_coding"; old "TCONS\_00794072";  
protein\_coding"; old "TCONS\_00781893";  
protein\_coding"; old "TCONS\_00781893";  
protein\_coding"; old "TCONS\_00781926";  
protein\_coding"; old "TCONS\_00781994";  
protein\_coding"; old "TCONS\_00781994";  
protein\_coding"; old "TCONS\_00781994";



protein\_coding"; old "TCONS\_00788376";  
protein\_coding"; old "TCONS\_00799688";  
protein\_coding"; old "TCONS\_00799688";  
protein\_coding"; old "TCONS\_00782328";  
protein\_coding"; old "TCONS\_00782328";  
protein\_coding"; old "TCONS\_00782328";  
protein\_coding"; old "TCONS\_00782328";  
protein\_coding"; old "TCONS\_00794787";  
protein\_coding"; old "TCONS\_00794787";  
protein\_coding"; old "TCONS\_00788515";  
protein\_coding"; old "TCONS\_00788515";  
protein\_coding"; old "TCONS\_00782479";  
protein\_coding"; old "TCONS\_00782479";  
protein\_coding"; old "TCONS\_00794902";  
protein\_coding"; old "TCONS\_00794902";  
protein\_coding"; old "TCONS\_00794902";  
protein\_coding"; old "TCONS\_00799878";  
protein\_coding"; old "TCONS\_00799878";  
protein\_coding"; old "TCONS\_00788681";  
protein\_coding"; old "TCONS\_00788681";  
protein\_coding"; old "TCONS\_00788683";  
protein\_coding"; old "TCONS\_00795045";  
protein\_coding"; old "TCONS\_00795045";  
protein\_coding"; old "TCONS\_00782757";  
protein\_coding"; old "TCONS\_00782800";  
protein\_coding"; old "TCONS\_00788748";  
protein\_coding"; old "TCONS\_00788748";



protein\_coding"; old "TCONS\_00788947";  
protein\_coding"; old "TCONS\_00783024";  
protein\_coding"; old "TCONS\_00795353";  
protein\_coding"; old "TCONS\_00783090";  
protein\_coding"; old "TCONS\_00783090";  
protein\_coding"; old "TCONS\_00783090";  
protein\_coding"; old "TCONS\_00795507";  
protein\_coding"; old "TCONS\_00795507";  
protein\_coding"; old "TCONS\_00800377";  
protein\_coding"; old "TCONS\_00800377";  
protein\_coding"; old "TCONS\_00800377";  
protein\_coding"; old "TCONS\_00783571";  
protein\_coding"; old "TCONS\_00783571";  
protein\_coding"; old "TCONS\_00783571";  
protein\_coding"; old "TCONS\_00783611";  
protein\_coding"; old "TCONS\_00783611";  
protein\_coding"; old "TCONS\_00800619";  
protein\_coding"; old "TCONS\_00789528";  
protein\_coding"; old "TCONS\_00789528";  
protein\_coding"; old "TCONS\_00789528";





protein\_coding"; old "TCONS\_00783855";  
protein\_coding"; old "TCONS\_00783855";  
protein\_coding"; old "TCONS\_00783905";  
protein\_coding"; old "TCONS\_00784152";  
protein\_coding"; old "TCONS\_00784152";  
protein\_coding"; old "TCONS\_00784152";  
protein\_coding"; old "TCONS\_00789845";  
protein\_coding"; old "TCONS\_00784157";  
protein\_coding"; old "TCONS\_00784157";  
protein\_coding"; old "TCONS\_00789906";  
protein\_coding"; old "TCONS\_00784265";  
protein\_coding"; old "TCONS\_00784265";  
protein\_coding"; old "TCONS\_00784265";  
protein\_coding"; old "TCONS\_00789917";  
protein\_coding"; old "TCONS\_00789917";  
protein\_coding"; old "TCONS\_00789917";  
protein\_coding"; old "TCONS\_00801016";  
protein\_coding"; old "TCONS\_00801016";  
protein\_coding"; old "TCONS\_00784468";  
protein\_coding"; old "TCONS\_00784468";  
protein\_coding"; old "TCONS\_00784468";  
protein\_coding"; old "TCONS\_00784530";  
protein\_coding"; old "TCONS\_00784530";







"protein\_coding"; old "TCONS\_00832351";  
"protein\_coding"; old "TCONS\_00832351";  
protein\_coding"; old "TCONS\_00858601";  
"protein\_coding"; old "TCONS\_00858601";  
protein\_coding"; old "TCONS\_00821119";  
protein\_coding"; old "TCONS\_00821119";  
protein\_coding"; old "TCONS\_00851369";  
protein\_coding"; old "TCONS\_00851369";  
protein\_coding"; old "TCONS\_00851369";  
protein\_coding"; old "TCONS\_00851369";  
protein\_coding"; old "TCONS\_00851368";  
protein\_coding"; old "TCONS\_00821142";  
protein\_coding"; old "TCONS\_00821142";  
protein\_coding"; old "TCONS\_00821155";  
protein\_coding"; old "TCONS\_00821155";  
protein\_coding"; old "TCONS\_00821155";  
protein\_coding"; old "TCONS\_00821155";

protein\_coding"; old "TCONS\_00821155";  
protein\_coding"; old "TCONS\_00821157";  
protein\_coding"; old "TCONS\_00821157";  
protein\_coding"; old "TCONS\_00841719";  
protein\_coding"; old "TCONS\_00841719";  
protein\_coding"; old "TCONS\_00821271";  
protein\_coding"; old "TCONS\_00821271";  
protein\_coding"; old "TCONS\_00832547";  
protein\_coding"; old "TCONS\_00832547";  
protein\_coding"; old "TCONS\_00832547";  
protein\_coding"; old "TCONS\_00821369";  
protein\_coding"; old "TCONS\_00821369";  
protein\_coding"; old "TCONS\_00832861";  
protein\_coding"; old "TCONS\_00821778";  
protein\_coding"; old "TCONS\_00821778";  
protein\_coding"; old "TCONS\_00833068";  
protein\_coding"; old "TCONS\_00833068";  
protein\_coding"; old "TCONS\_00833183";  
protein\_coding"; old "TCONS\_00833183";  
protein\_coding"; old "TCONS\_00833183";  
protein\_coding"; old "TCONS\_00822096";  
protein\_coding"; old "TCONS\_00822096";  
protein\_coding"; old "TCONS\_00822097";  
protein\_coding"; old "TCONS\_00822097";  
protein\_coding"; old "TCONS\_00822108";  
protein\_coding"; old "TCONS\_00822108";  
protein\_coding"; old "TCONS\_00822108";  
protein\_coding"; old "TCONS\_00822155";  
protein\_coding"; old "TCONS\_00822155";  
protein\_coding"; old "TCONS\_00822155";  
protein\_coding"; old "TCONS\_00822155";

protein\_coding"; old "TCONS\_00822156";  
protein\_coding"; old "TCONS\_00822156";  
protein\_coding"; old "TCONS\_00822156";  
protein\_coding"; old "TCONS\_00822156";  
protein\_coding"; old "TCONS\_00822212";  
protein\_coding"; old "TCONS\_00822535";  
protein\_coding"; old "TCONS\_00822535";  
protein\_coding"; old "TCONS\_00822729";  
protein\_coding"; old "TCONS\_00822729";  
protein\_coding"; old "TCONS\_00822729";  
protein\_coding"; old "TCONS\_00822729";  
protein\_coding"; old "TCONS\_00822792";  
protein\_coding"; old "TCONS\_00822792";  
protein\_coding"; old "TCONS\_00822792";  
protein\_coding"; old "TCONS\_00822792";  
protein\_coding"; old "TCONS\_00878723";  
protein\_coding"; old "TCONS\_00833716";  
protein\_coding"; old "TCONS\_00833716";  
protein\_coding"; old "TCONS\_00822837";  
protein\_coding"; old "TCONS\_00822837";  
protein\_coding"; old "TCONS\_00822837";  
protein\_coding"; old "TCONS\_00822837";  
protein\_coding"; old "TCONS\_00822839";  
protein\_coding"; old "TCONS\_00822839";  
protein\_coding"; old "TCONS\_00822839";  
protein\_coding"; old "TCONS\_00843305";  
protein\_coding"; old "TCONS\_00843305";  
protein\_coding"; old "TCONS\_00843305";  
protein\_coding"; old "TCONS\_00843306";

protein\_coding"; old "TCONS\_00843306";  
protein\_coding"; old "TCONS\_00822845";  
protein\_coding"; old "TCONS\_00833752";  
protein\_coding"; old "TCONS\_00833752";  
protein\_coding"; old "TCONS\_00852530";  
protein\_coding"; old "TCONS\_00822854";  
protein\_coding"; old "TCONS\_00833756";  
protein\_coding"; old "TCONS\_00833756";  
protein\_coding"; old "TCONS\_00822879";  
protein\_coding"; old "TCONS\_00822879";  
protein\_coding"; old "TCONS\_00823037";  
protein\_coding"; old "TCONS\_00823203";  
protein\_coding"; old "TCONS\_00823203";  
protein\_coding"; old "TCONS\_00823203";  
protein\_coding"; old "TCONS\_00834000";  
protein\_coding"; old "TCONS\_00834000";  
protein\_coding"; old "TCONS\_00823207";  
protein\_coding"; old "TCONS\_00823207";  
protein\_coding"; old "TCONS\_00823254";



protein\_coding"; old "TCONS\_00823254";  
protein\_coding"; old "TCONS\_00823254";  
protein\_coding"; old "TCONS\_00823313";  
protein\_coding"; old "TCONS\_00823312";  
protein\_coding"; old "TCONS\_00823312";  
protein\_coding"; old "TCONS\_00823312";  
protein\_coding"; old "TCONS\_00823312";  
protein\_coding"; old "TCONS\_00834072";  
protein\_coding"; old "TCONS\_00823342";  
protein\_coding"; old "TCONS\_00823358";  
protein\_coding"; old "TCONS\_00823358";  
protein\_coding"; old "TCONS\_00823479";  
protein\_coding"; old "TCONS\_00823479";  
protein\_coding"; old "TCONS\_00823787";  
protein\_coding"; old "TCONS\_00844033";  
protein\_coding"; old "TCONS\_00844033";  
protein\_coding"; old "TCONS\_00844033";  
protein\_coding"; old "TCONS\_00823814";  
protein\_coding"; old "TCONS\_00823814";  
protein\_coding"; old "TCONS\_00834491";  
protein\_coding"; old "TCONS\_00834491";  
protein\_coding"; old "TCONS\_00823834";

protein\_coding"; old "TCONS\_00823834";  
protein\_coding"; old "TCONS\_00823833";  
protein\_coding"; old "TCONS\_00823833";  
protein\_coding"; old "TCONS\_00823833";  
protein\_coding"; old "TCONS\_00823832";  
protein\_coding"; old "TCONS\_00823832";  
protein\_coding"; old "TCONS\_00823832";  
protein\_coding"; old "TCONS\_00844080";  
protein\_coding"; old "TCONS\_00844080";  
protein\_coding"; old "TCONS\_00844080";  
protein\_coding"; old "TCONS\_00823889";  
protein\_coding"; old "TCONS\_00823889";  
protein\_coding"; old "TCONS\_00823889";  
protein\_coding"; old "TCONS\_00853183";  
protein\_coding"; old "TCONS\_00853183";  
protein\_coding"; old "TCONS\_00853183";  
protein\_coding"; old "TCONS\_00823921";  
protein\_coding"; old "TCONS\_00823921";  
protein\_coding"; old "TCONS\_00823921";  
protein\_coding"; old "TCONS\_00823921";  
protein\_coding"; old "TCONS\_00834653";  
protein\_coding"; old "TCONS\_00834653";  
protein\_coding"; old "TCONS\_00834657";  
protein\_coding"; old "TCONS\_00824039";  
protein\_coding"; old "TCONS\_00824039";  
protein\_coding"; old "TCONS\_00824039";  
protein\_coding"; old "TCONS\_00824039";  
protein\_coding"; old "TCONS\_00853269";  
protein\_coding"; old "TCONS\_00853269";  
protein\_coding"; old "TCONS\_00853281";

protein\_coding"; old "TCONS\_00824244";  
protein\_coding"; old "TCONS\_00824312";  
protein\_coding"; old "TCONS\_00824312";  
protein\_coding"; old "TCONS\_00824362";  
protein\_coding"; old "TCONS\_00824362";  
protein\_coding"; old "TCONS\_00824362";  
protein\_coding"; old "TCONS\_00824362";  
protein\_coding"; old "TCONS\_00844561";  
protein\_coding"; old "TCONS\_00844561";  
protein\_coding"; old "TCONS\_00824557";  
protein\_coding"; old "TCONS\_00824558";  
protein\_coding"; old "TCONS\_00824558";  
protein\_coding"; old "TCONS\_00824576";  
protein\_coding"; old "TCONS\_00824576";  
protein\_coding"; old "TCONS\_00873579";  
protein\_coding"; old "TCONS\_00873579";  
protein\_coding"; old "TCONS\_00824675";  
protein\_coding"; old "TCONS\_00824675";  
protein\_coding"; old "TCONS\_00824950";  
protein\_coding"; old "TCONS\_00824950";  
protein\_coding"; old "TCONS\_00824950";  
protein\_coding"; old "TCONS\_00824950";  
protein\_coding"; old "TCONS\_00824949";  
protein\_coding"; old "TCONS\_00824949";

protein\_coding"; old "TCONS\_00824949";  
protein\_coding"; old "TCONS\_00824949";  
protein\_coding"; old "TCONS\_00844946";  
protein\_coding"; old "TCONS\_00844946";  
protein\_coding"; old "TCONS\_00844946";  
protein\_coding"; old "TCONS\_00825033";  
protein\_coding"; old "TCONS\_00825033";  
protein\_coding"; old "TCONS\_00835421";  
protein\_coding"; old "TCONS\_00835421";  
protein\_coding"; old "TCONS\_00835420";  
protein\_coding"; old "TCONS\_00835420";  
protein\_coding"; old "TCONS\_00835476";  
protein\_coding"; old "TCONS\_00835476";  
protein\_coding"; old "TCONS\_00860790";  
protein\_coding"; old "TCONS\_00860790";  
protein\_coding"; old "TCONS\_00860790";  
protein\_coding"; old "TCONS\_00825321";  
protein\_coding"; old "TCONS\_00825321";  
protein\_coding"; old "TCONS\_00825321";  
protein\_coding"; old "TCONS\_00825409";  
protein\_coding"; old "TCONS\_00825649";  
protein\_coding"; old "TCONS\_00825649";  
protein\_coding"; old "TCONS\_00825795";  
protein\_coding"; old "TCONS\_00825855";  
protein\_coding"; old "TCONS\_00825855";  
protein\_coding"; old "TCONS\_00836261";

protein\_coding"; old "TCONS\_00836261";  
protein\_coding"; old "TCONS\_00836261";  
protein\_coding"; old "TCONS\_00826199";  
protein\_coding"; old "TCONS\_00826199";  
protein\_coding"; old "TCONS\_00836358";  
protein\_coding"; old "TCONS\_00836358";  
protein\_coding"; old "TCONS\_00836358";  
protein\_coding"; old "TCONS\_00836358";  
protein\_coding"; old "TCONS\_00826240";  
protein\_coding"; old "TCONS\_00861407";  
protein\_coding"; old "TCONS\_00868003";  
protein\_coding"; old "TCONS\_00868003";  
protein\_coding"; old "TCONS\_00868003";  
protein\_coding"; old "TCONS\_00868003";  
protein\_coding"; old "TCONS\_00845990";  
protein\_coding"; old "TCONS\_00845990";  
protein\_coding"; old "TCONS\_00845990";  
protein\_coding"; old "TCONS\_00826244";  
protein\_coding"; old "TCONS\_00826244";  
protein\_coding"; old "TCONS\_00826245";  
protein\_coding"; old "TCONS\_00826245";  
protein\_coding"; old "TCONS\_00868006";  
protein\_coding"; old "TCONS\_00868006";  
protein\_coding"; old "TCONS\_00868006";  
protein\_coding"; old "TCONS\_00854634";  
protein\_coding"; old "TCONS\_00854634";

protein\_coding"; old "TCONS\_00854634";  
protein\_coding"; old "TCONS\_00826246";  
protein\_coding"; old "TCONS\_00826246";  
protein\_coding"; old "TCONS\_00826360";  
protein\_coding"; old "TCONS\_00826368";  
protein\_coding"; old "TCONS\_00826368";  
protein\_coding"; old "TCONS\_00826368";  
protein\_coding"; old "TCONS\_00826368";  
protein\_coding"; old "TCONS\_00826603";  
protein\_coding"; old "TCONS\_00846347";  
protein\_coding"; old "TCONS\_00846347";  
protein\_coding"; old "TCONS\_00846347";  
protein\_coding"; old "TCONS\_00874681";  
protein\_coding"; old "TCONS\_00836661";  
protein\_coding"; old "TCONS\_00836661";  
protein\_coding"; old "TCONS\_00836661";  
protein\_coding"; old "TCONS\_00846350";  
protein\_coding"; old "TCONS\_00846350";  
protein\_coding"; old "TCONS\_00846350";  
protein\_coding"; old "TCONS\_00826627";  
protein\_coding"; old "TCONS\_00836719";  
protein\_coding"; old "TCONS\_00836719";  
protein\_coding"; old "TCONS\_00836719";

protein\_coding"; old "TCONS\_00836719";  
protein\_coding"; old "TCONS\_00846579";  
protein\_coding"; old "TCONS\_00846579";  
protein\_coding"; old "TCONS\_00846579";  
protein\_coding"; old "TCONS\_00846579";  
protein\_coding"; old "TCONS\_00846580";  
protein\_coding"; old "TCONS\_00846580";  
protein\_coding"; old "TCONS\_00846580";  
protein\_coding"; old "TCONS\_00826785";  
protein\_coding"; old "TCONS\_00826785";  
protein\_coding"; old "TCONS\_00826786";  
protein\_coding"; old "TCONS\_00826786";  
protein\_coding"; old "TCONS\_00826867";  
protein\_coding"; old "TCONS\_00836998";  
protein\_coding"; old "TCONS\_00836998";  
protein\_coding"; old "TCONS\_00836998";  
protein\_coding"; old "TCONS\_00836998";  
protein\_coding"; old "TCONS\_00868447";  
protein\_coding"; old "TCONS\_00826976";  
protein\_coding"; old "TCONS\_00826976";  
protein\_coding"; old "TCONS\_00846960";  
protein\_coding"; old "TCONS\_00846960";  
protein\_coding"; old "TCONS\_00827096";  
protein\_coding"; old "TCONS\_00827096";  
protein\_coding"; old "TCONS\_00827131";  
protein\_coding"; old "TCONS\_00827170";  
protein\_coding"; old "TCONS\_00827170";  
protein\_coding"; old "TCONS\_00827170";  
protein\_coding"; old "TCONS\_00827201";  
protein\_coding"; old "TCONS\_00827201";  
protein\_coding"; old "TCONS\_00827212";





protein\_coding"; old "TCONS\_00837266";  
protein\_coding"; old "TCONS\_00837266";  
protein\_coding"; old "TCONS\_00837266";  
protein\_coding"; old "TCONS\_00837266";  
protein\_coding"; old "TCONS\_00827318";  
protein\_coding"; old "TCONS\_00827318";  
protein\_coding"; old "TCONS\_00827318";  
protein\_coding"; old "TCONS\_00827318";  
protein\_coding"; old "TCONS\_00827693";  
protein\_coding"; old "TCONS\_00827693";  
protein\_coding"; old "TCONS\_00827913";  
protein\_coding"; old "TCONS\_00827948";  
protein\_coding"; old "TCONS\_00847899";  
protein\_coding"; old "TCONS\_00828288";  
protein\_coding"; old "TCONS\_00828288";  
protein\_coding"; old "TCONS\_00828350";  
protein\_coding"; old "TCONS\_00828350";  
protein\_coding"; old "TCONS\_00856057";  
protein\_coding"; old "TCONS\_00856057";  
protein\_coding"; old "TCONS\_00856057";  
protein\_coding"; old "TCONS\_00828366";  
protein\_coding"; old "TCONS\_00828366";  
protein\_coding"; old "TCONS\_00828366";  
protein\_coding"; old "TCONS\_00838091";  
protein\_coding"; old "TCONS\_00838091";

protein\_coding"; old "TCONS\_00838091";  
protein\_coding"; old "TCONS\_00838091";  
protein\_coding"; old "TCONS\_00838091";  
protein\_coding"; old "TCONS\_00838092";  
protein\_coding"; old "TCONS\_00838092";  
protein\_coding"; old "TCONS\_00838092";  
protein\_coding"; old "TCONS\_00838092";  
protein\_coding"; old "TCONS\_00856075";  
protein\_coding"; old "TCONS\_00828384";  
protein\_coding"; old "TCONS\_00869258";  
protein\_coding"; old "TCONS\_00838097";  
protein\_coding"; old "TCONS\_00838097";  
protein\_coding"; old "TCONS\_00838097";  
protein\_coding"; old "TCONS\_00838097";  
protein\_coding"; old "TCONS\_00838172";  
protein\_coding"; old "TCONS\_00838172";  
protein\_coding"; old "TCONS\_00838178";  
protein\_coding"; old "TCONS\_00838178";  
protein\_coding"; old "TCONS\_00838178";  
protein\_coding"; old "TCONS\_00838178";  
protein\_coding"; old "TCONS\_00838178";

protein\_coding"; old "TCONS\_00838178";  
protein\_coding"; old "TCONS\_00838178";  
protein\_coding"; old "TCONS\_00838178";  
protein\_coding"; old "TCONS\_00838178";  
"protein\_coding"; old "TCONS\_00838178";  
protein\_coding"; old "TCONS\_00862707";  
"protein\_coding"; old "TCONS\_00862707";  
"protein\_coding"; old "TCONS\_00862707";  
"protein\_coding"; old "TCONS\_00862707";  
protein\_coding"; old "TCONS\_00838179";  
protein\_coding"; old "TCONS\_00838179";  
protein\_coding"; old "TCONS\_00838179";  
protein\_coding"; old "TCONS\_00838179";  
protein\_coding"; old "TCONS\_00828483";  
protein\_coding"; old "TCONS\_00838180";  
protein\_coding"; old "TCONS\_00838180";  
protein\_coding"; old "TCONS\_00838186";  
protein\_coding"; old "TCONS\_00838186";  
protein\_coding"; old "TCONS\_00838186";  
protein\_coding"; old "TCONS\_00838185";  
protein\_coding"; old "TCONS\_00838185";  
protein\_coding"; old "TCONS\_00828501";

protein\_coding"; old "TCONS\_00828501";  
protein\_coding"; old "TCONS\_00828502";  
protein\_coding"; old "TCONS\_00828502";  
protein\_coding"; old "TCONS\_00838189";  
protein\_coding"; old "TCONS\_00838189";  
protein\_coding"; old "TCONS\_00856158";  
protein\_coding"; old "TCONS\_00856158";  
protein\_coding"; old "TCONS\_00881599";  
protein\_coding"; old "TCONS\_00856162";  
"protein\_coding"; old "TCONS\_00856162";  
"protein\_coding"; old "TCONS\_00856162";  
protein\_coding"; old "TCONS\_00869328";  
protein\_coding"; old "TCONS\_00828514";  
protein\_coding"; old "TCONS\_00828514";  
protein\_coding"; old "TCONS\_00828514";  
protein\_coding"; old "TCONS\_00828514";

protein\_coding"; old "TCONS\_00828514";  
protein\_coding"; old "TCONS\_00848267";  
protein\_coding"; old "TCONS\_00848267";  
protein\_coding"; old "TCONS\_00848267";  
protein\_coding"; old "TCONS\_00856178";  
protein\_coding"; old "TCONS\_00856178";  
protein\_coding"; old "TCONS\_00828531";  
protein\_coding"; old "TCONS\_00828531";  
protein\_coding"; old "TCONS\_00828531";  
protein\_coding"; old "TCONS\_00838214";  
protein\_coding"; old "TCONS\_00838214";  
protein\_coding"; old "TCONS\_00838214";  
protein\_coding"; old "TCONS\_00838214";  
protein\_coding"; old "TCONS\_00838233";  
protein\_coding"; old "TCONS\_00828557";  
protein\_coding"; old "TCONS\_00828557";  
protein\_coding"; old "TCONS\_00828557";  
protein\_coding"; old "TCONS\_00828557";  
protein\_coding"; old "TCONS\_00828573";  
protein\_coding"; old "TCONS\_00828573";  
protein\_coding"; old "TCONS\_00828584";  
protein\_coding"; old "TCONS\_00828584";  
protein\_coding"; old "TCONS\_00856217";  
protein\_coding"; old "TCONS\_00856217";  
protein\_coding"; old "TCONS\_00856217";  
protein\_coding"; old "TCONS\_00828583";  
protein\_coding"; old "TCONS\_00828583";  
protein\_coding"; old "TCONS\_00848367";  
protein\_coding"; old "TCONS\_00848367";  
protein\_coding"; old "TCONS\_00848367";

protein\_coding"; old "TCONS\_00848367";  
protein\_coding"; old "TCONS\_00848367";  
protein\_coding"; old "TCONS\_00828749";  
protein\_coding"; old "TCONS\_00828749";  
protein\_coding"; old "TCONS\_00828749";  
protein\_coding"; old "TCONS\_00828753";  
protein\_coding"; old "TCONS\_00828769";  
protein\_coding"; old "TCONS\_00828769";  
protein\_coding"; old "TCONS\_00828769";  
protein\_coding"; old "TCONS\_00828769";  
protein\_coding"; old "TCONS\_00856540";  
protein\_coding"; old "TCONS\_00856540";  
protein\_coding"; old "TCONS\_00856540";  
protein\_coding"; old "TCONS\_00848751";  
protein\_coding"; old "TCONS\_00848751";  
protein\_coding"; old "TCONS\_00848751";  
protein\_coding"; old "TCONS\_00848751";  
protein\_coding"; old "TCONS\_00856542";  
protein\_coding"; old "TCONS\_00856542";  
protein\_coding"; old "TCONS\_00863023";  
protein\_coding"; old "TCONS\_00863023";  
protein\_coding"; old "TCONS\_00869735";  
protein\_coding"; old "TCONS\_00869734";  
protein\_coding"; old "TCONS\_00829209";  
protein\_coding"; old "TCONS\_00829209";

protein\_coding"; old "TCONS\_00829209";  
protein\_coding"; old "TCONS\_00829209";  
protein\_coding"; old "TCONS\_00829209";  
protein\_coding"; old "TCONS\_00848846";  
protein\_coding"; old "TCONS\_00856611";  
protein\_coding"; old "TCONS\_00829225";  
protein\_coding"; old "TCONS\_00876150";  
protein\_coding"; old "TCONS\_00876150";  
protein\_coding"; old "TCONS\_00876150";  
protein\_coding"; old "TCONS\_00876150";  
protein\_coding"; old "TCONS\_00863104";  
protein\_coding"; old "TCONS\_00856631";  
protein\_coding"; old "TCONS\_00829250";  
protein\_coding"; old "TCONS\_00829250";  
protein\_coding"; old "TCONS\_00829250";  
protein\_coding"; old "TCONS\_00829250";

protein\_coding"; old "TCONS\_00829257";  
protein\_coding"; old "TCONS\_00829255";  
protein\_coding"; old "TCONS\_00856633";  
protein\_coding"; old "TCONS\_00848957";  
protein\_coding"; old "TCONS\_00848957";  
protein\_coding"; old "TCONS\_00829374";  
protein\_coding"; old "TCONS\_00829374";  
protein\_coding"; old "TCONS\_00829464";  
protein\_coding"; old "TCONS\_00829464";  
protein\_coding"; old "TCONS\_00829684";  
protein\_coding"; old "TCONS\_00829684";  
protein\_coding"; old "TCONS\_00829683";  
protein\_coding"; old "TCONS\_00829683";  
protein\_coding"; old "TCONS\_00829683";  
protein\_coding"; old "TCONS\_00839090";  
protein\_coding"; old "TCONS\_00839090";  
protein\_coding"; old "TCONS\_00839090";  
protein\_coding"; old "TCONS\_00839096";  
protein\_coding"; old "TCONS\_00839096";  
protein\_coding"; old "TCONS\_00839096";



protein\_coding"; old "TCONS\_00839096";  
protein\_coding"; old "TCONS\_00839096";  
protein\_coding"; old "TCONS\_00839096";  
protein\_coding"; old "TCONS\_00839096";  
protein\_coding"; old "TCONS\_00829689";  
protein\_coding"; old "TCONS\_00829692";  
protein\_coding"; old "TCONS\_00829709";  
protein\_coding"; old "TCONS\_00829998";  
protein\_coding"; old "TCONS\_00839534";  
protein\_coding"; old "TCONS\_00839534";  
protein\_coding"; old "TCONS\_00839534";  
protein\_coding"; old "TCONS\_00839534";  
protein\_coding"; old "TCONS\_00839533";  
protein\_coding"; old "TCONS\_00876676";  
protein\_coding"; old "TCONS\_00876676";  
protein\_coding"; old "TCONS\_00876676";  
protein\_coding"; old "TCONS\_00876676";  
protein\_coding"; old "TCONS\_00839535";  
protein\_coding"; old "TCONS\_00839535";  
protein\_coding"; old "TCONS\_00839535";  
protein\_coding"; old "TCONS\_00830228";  
protein\_coding"; old "TCONS\_00830228";  
protein\_coding"; old "TCONS\_00830228";

protein\_coding"; old "TCONS\_00830229";  
protein\_coding"; old "TCONS\_00830229";  
protein\_coding"; old "TCONS\_00830229";  
protein\_coding"; old "TCONS\_00857224";  
protein\_coding"; old "TCONS\_00857224";  
protein\_coding"; old "TCONS\_00857224";  
protein\_coding"; old "TCONS\_00857224";  
protein\_coding"; old "TCONS\_00830279";  
protein\_coding"; old "TCONS\_00830279";  
protein\_coding"; old "TCONS\_00830279";  
protein\_coding"; old "TCONS\_00830278";  
protein\_coding"; old "TCONS\_00830278";  
protein\_coding"; old "TCONS\_00830613";  
protein\_coding"; old "TCONS\_00830613";  
protein\_coding"; old "TCONS\_00857465";  
protein\_coding"; old "TCONS\_00857465";  
protein\_coding"; old "TCONS\_00857465";  
protein\_coding"; old "TCONS\_00830656";  
protein\_coding"; old "TCONS\_00830656";  
protein\_coding"; old "TCONS\_00830742";  
protein\_coding"; old "TCONS\_00840010";  
protein\_coding"; old "TCONS\_00840010";  
protein\_coding"; old "TCONS\_00831216";  
protein\_coding"; old "TCONS\_00831216";  
protein\_coding"; old "TCONS\_00831216";  
protein\_coding"; old "TCONS\_00840273";  
protein\_coding"; old "TCONS\_00840273";  
protein\_coding"; old "TCONS\_00831230";  
protein\_coding"; old "TCONS\_00831230";  
protein\_coding"; old "TCONS\_00831230";  
protein\_coding"; old "TCONS\_00831230";

protein\_coding"; old "TCONS\_00831230";  
protein\_coding"; old "TCONS\_00831230";  
protein\_coding"; old "TCONS\_00831230";  
protein\_coding"; old "TCONS\_00831230";  
protein\_coding"; old "TCONS\_00831230";  
"protein\_coding"; old "TCONS\_00831230";  
"protein\_coding"; old "TCONS\_00831230";  
"protein\_coding"; old "TCONS\_00831230";  
protein\_coding"; old "TCONS\_00840278";  
protein\_coding"; old "TCONS\_00840278";  
protein\_coding"; old "TCONS\_00840278";  
protein\_coding"; old "TCONS\_00850418";  
protein\_coding"; old "TCONS\_00831249";  
protein\_coding"; old "TCONS\_00831249";  
protein\_coding"; old "TCONS\_00831249";  
protein\_coding"; old "TCONS\_00831260";  
protein\_coding"; old "TCONS\_00831260";  
protein\_coding"; old "TCONS\_00831260";  
protein\_coding"; old "TCONS\_00877264";  
protein\_coding"; old "TCONS\_00857832";  
protein\_coding"; old "TCONS\_00831288";  
protein\_coding"; old "TCONS\_00831288";  
protein\_coding"; old "TCONS\_00831288";

protein\_coding"; old "TCONS\_00857846";  
protein\_coding"; old "TCONS\_00857846";  
protein\_coding"; old "TCONS\_00831348";  
protein\_coding"; old "TCONS\_00831348";  
protein\_coding"; old "TCONS\_00831376";  
protein\_coding"; old "TCONS\_00831376";  
protein\_coding"; old "TCONS\_00850547";  
protein\_coding"; old "TCONS\_00889262";  
protein\_coding"; old "TCONS\_00889712";  
protein\_coding"; old "TCONS\_00889712";  
protein\_coding"; old "TCONS\_00889712";  
protein\_coding"; old "TCONS\_00889712";  
protein\_coding"; old "TCONS\_00889275";  
protein\_coding"; old "TCONS\_00889275";  
protein\_coding"; old "TCONS\_00889283";  
protein\_coding"; old "TCONS\_00889336";  
protein\_coding"; old "TCONS\_00889800";  
protein\_coding"; old "TCONS\_00889800";



protein\_coding"; old "TCONS\_00893575";  
protein\_coding"; old "TCONS\_00893576";  
protein\_coding"; old "TCONS\_00894368";  
protein\_coding"; old "TCONS\_00894393";  
protein\_coding"; old "TCONS\_00894402";  
protein\_coding"; old "TCONS\_00894402";  
protein\_coding"; old "TCONS\_00894402";  
protein\_coding"; old "TCONS\_00894416";  
protein\_coding"; old "TCONS\_00894416";  
protein\_coding"; old "TCONS\_00894428";  
protein\_coding"; old "TCONS\_00894610";  
protein\_coding"; old "TCONS\_00894610";  
protein\_coding"; old "TCONS\_00894941";  
protein\_coding"; old "TCONS\_00894941";  
protein\_coding"; old "TCONS\_00894941";  
protein\_coding"; old "TCONS\_00895274";  
protein\_coding"; old "TCONS\_00895335";  
protein\_coding"; old "TCONS\_00895335";  
protein\_coding"; old "TCONS\_00895335";  
protein\_coding"; old "TCONS\_00895335";  
protein\_coding"; old "TCONS\_00895334";  
protein\_coding"; old "TCONS\_00895334";  
protein\_coding"; old "TCONS\_00895334";  
protein\_coding"; old "TCONS\_00895334";  
protein\_coding"; old "TCONS\_00895491";  
protein\_coding"; old "TCONS\_00895491";  
protein\_coding"; old "TCONS\_00896112";  
protein\_coding"; old "TCONS\_00896112";  
protein\_coding"; old "TCONS\_00896112";  
protein\_coding"; old "TCONS\_00895939";

protein\_coding"; old "TCONS\_00895939";  
protein\_coding"; old "TCONS\_00895939";  
protein\_coding"; old "TCONS\_00895939";  
protein\_coding"; old "TCONS\_00896273";  
protein\_coding"; old "TCONS\_00896273";  
protein\_coding"; old "TCONS\_00896030";  
protein\_coding"; old "TCONS\_00896030";  
protein\_coding"; old "TCONS\_00896030";  
protein\_coding"; old "TCONS\_00896031";  
protein\_coding"; old "TCONS\_00896031";  
protein\_coding"; old "TCONS\_00896031";  
protein\_coding"; old "TCONS\_00896031";  
protein\_coding"; old "TCONS\_00896925";  
protein\_coding"; old "TCONS\_00896990";  
protein\_coding"; old "TCONS\_00897102";  
protein\_coding"; old "TCONS\_00897102";  
protein\_coding"; old "TCONS\_00897102";  
protein\_coding"; old "TCONS\_00897018";  
protein\_coding"; old "TCONS\_00897018";  
protein\_coding"; old "TCONS\_00896959";  
protein\_coding"; old "TCONS\_00897127";  
protein\_coding"; old "TCONS\_00896986";  
protein\_coding"; old "TCONS\_00896986";  
protein\_coding"; old "TCONS\_00897100";







protein\_coding"; old "TCONS\_00901691";  
protein\_coding"; old "TCONS\_00901691";  
protein\_coding"; old "TCONS\_00901691";  
protein\_coding"; old "TCONS\_00901691";  
protein\_coding"; old "TCONS\_00901692";  
protein\_coding"; old "TCONS\_00901692";  
protein\_coding"; old "TCONS\_00901692";  
protein\_coding"; old "TCONS\_00901759";  
protein\_coding"; old "TCONS\_00901759";  
protein\_coding"; old "TCONS\_00901759";  
protein\_coding"; old "TCONS\_00901772";  
protein\_coding"; old "TCONS\_00901780";  
protein\_coding"; old "TCONS\_00901780";  
protein\_coding"; old "TCONS\_00901780";  
protein\_coding"; old "TCONS\_00901941";  
protein\_coding"; old "TCONS\_00901941";  
protein\_coding"; old "TCONS\_00901824";  
protein\_coding"; old "TCONS\_00901824";  
protein\_coding"; old "TCONS\_00901911";  
protein\_coding"; old "TCONS\_00901911";  
protein\_coding"; old "TCONS\_00902401";  
protein\_coding"; old "TCONS\_00902401";  
protein\_coding"; old "TCONS\_00902353";  
protein\_coding"; old "TCONS\_00902353";  
protein\_coding"; old "TCONS\_00902090";  
protein\_coding"; old "TCONS\_00902090";  
protein\_coding"; old "TCONS\_00902589";  
protein\_coding"; old "TCONS\_00903369";  
protein\_coding"; old "TCONS\_00903369";

protein\_coding"; old "TCONS\_00903370";  
protein\_coding"; old "TCONS\_00903370";  
protein\_coding"; old "TCONS\_00903370";  
protein\_coding"; old "TCONS\_00903371";  
protein\_coding"; old "TCONS\_00903371";  
protein\_coding"; old "TCONS\_00903929";  
protein\_coding"; old "TCONS\_00903928";  
protein\_coding"; old "TCONS\_00903928";  
protein\_coding"; old "TCONS\_00903928";  
protein\_coding"; old "TCONS\_00903928";  
protein\_coding"; old "TCONS\_00903923";  
protein\_coding"; old "TCONS\_00903934";  
protein\_coding"; old "TCONS\_00904130";  
protein\_coding"; old "TCONS\_00904130";  
protein\_coding"; old "TCONS\_00904136";  
protein\_coding"; old "TCONS\_00904136";  
protein\_coding"; old "TCONS\_00904139";  
protein\_coding"; old "TCONS\_00904139";  
protein\_coding"; old "TCONS\_00904139";  
protein\_coding"; old "TCONS\_00904248";  
protein\_coding"; old "TCONS\_00904248";  
protein\_coding"; old "TCONS\_00904839";



protein\_coding"; old "TCONS\_00905552";  
protein\_coding"; old "TCONS\_00905552";  
protein\_coding"; old "TCONS\_00905678";  
protein\_coding"; old "TCONS\_00906825";  
protein\_coding"; old "TCONS\_00906825";  
protein\_coding"; old "TCONS\_00906825";  
protein\_coding"; old "TCONS\_00906825";  
protein\_coding"; old "TCONS\_00907789";  
protein\_coding"; old "TCONS\_00908351";  
protein\_coding"; old "TCONS\_00908351";  
protein\_coding"; old "TCONS\_00908728";  
protein\_coding"; old "TCONS\_00908728";  
protein\_coding"; old "TCONS\_00908728";  
protein\_coding"; old "TCONS\_00909707";  
protein\_coding"; old "TCONS\_00909707";  
protein\_coding"; old "TCONS\_00909707";  
protein\_coding"; old "TCONS\_00910268";  
protein\_coding"; old "TCONS\_00910268";  
protein\_coding"; old "TCONS\_00911236";  
protein\_coding"; old "TCONS\_00909745";  
protein\_coding"; old "TCONS\_00909745";  
protein\_coding"; old "TCONS\_00909745";  
protein\_coding"; old "TCONS\_00909745";  
protein\_coding"; old "TCONS\_00910051";  
protein\_coding"; old "TCONS\_00910051";  
protein\_coding"; old "TCONS\_00909770";  
protein\_coding"; old "TCONS\_00909770";

protein\_coding"; old "TCONS\_00909793";  
protein\_coding"; old "TCONS\_00909793";  
protein\_coding"; old "TCONS\_00909818";  
protein\_coding"; old "TCONS\_00909818";  
protein\_coding"; old "TCONS\_00909818";  
protein\_coding"; old "TCONS\_00910770";  
protein\_coding"; old "TCONS\_00910770";  
protein\_coding"; old "TCONS\_00910770";  
protein\_coding"; old "TCONS\_00909821";  
protein\_coding"; old "TCONS\_00909821";  
protein\_coding"; old "TCONS\_00911274";  
protein\_coding"; old "TCONS\_00911274";  
protein\_coding"; old "TCONS\_00911274";  
protein\_coding"; old "TCONS\_00911274";  
protein\_coding"; old "TCONS\_00911280";  
protein\_coding"; old "TCONS\_00911280";  
protein\_coding"; old "TCONS\_00910800";  
protein\_coding"; old "TCONS\_00910800";  
protein\_coding"; old "TCONS\_00910800";  
protein\_coding"; old "TCONS\_00910800";  
protein\_coding"; old "TCONS\_00910141";  
protein\_coding"; old "TCONS\_00910145";  
protein\_coding"; old "TCONS\_00910145";  
protein\_coding"; old "TCONS\_00910145";  
protein\_coding"; old "TCONS\_00910145";  
protein\_coding"; old "TCONS\_00910158";  
protein\_coding"; old "TCONS\_00909878";  
protein\_coding"; old "TCONS\_00909900";  
protein\_coding"; old "TCONS\_00909900";  
protein\_coding"; old "TCONS\_00910447";  
protein\_coding"; old "TCONS\_00910447";

protein\_coding"; old "TCONS\_00910447";  
protein\_coding"; old "TCONS\_00910674";  
protein\_coding"; old "TCONS\_00909942";  
protein\_coding"; old "TCONS\_00909942";  
protein\_coding"; old "TCONS\_00909942";  
protein\_coding"; old "TCONS\_00909962";  
protein\_coding"; old "TCONS\_00909962";  
protein\_coding"; old "TCONS\_00909961";  
protein\_coding"; old "TCONS\_00909961";  
protein\_coding"; old "TCONS\_00909971";  
protein\_coding"; old "TCONS\_00909971";  
protein\_coding"; old "TCONS\_00909971";  
protein\_coding"; old "TCONS\_00909971";  
protein\_coding"; old "TCONS\_00910224";  
protein\_coding"; old "TCONS\_00910224";  
protein\_coding"; old "TCONS\_00910224";  
protein\_coding"; old "TCONS\_00909985";  
protein\_coding"; old "TCONS\_00910529";  
protein\_coding"; old "TCONS\_00911634";  
protein\_coding"; old "TCONS\_00912245";  
protein\_coding"; old "TCONS\_00912245";  
protein\_coding"; old "TCONS\_00912245";  
protein\_coding"; old "TCONS\_00912288";  
protein\_coding"; old "TCONS\_00912288";  
protein\_coding"; old "TCONS\_00913215";





protein\_coding"; old "TCONS\_00914912";  
protein\_coding"; old "TCONS\_00914912";  
protein\_coding"; old "TCONS\_00914912";  
protein\_coding"; old "TCONS\_00914942";  
protein\_coding"; old "TCONS\_00914942";  
protein\_coding"; old "TCONS\_00914942";  
protein\_coding"; old "TCONS\_00914942";  
protein\_coding"; old "TCONS\_00914904";  
protein\_coding"; old "TCONS\_00914904";  
protein\_coding"; old "TCONS\_00914904";  
protein\_coding"; old "TCONS\_00916699";  
protein\_coding"; old "TCONS\_00916699";  
protein\_coding"; old "TCONS\_00916698";  
protein\_coding"; old "TCONS\_00916698";  
protein\_coding"; old "TCONS\_00917704";  
protein\_coding"; old "TCONS\_00917704";  
protein\_coding"; old "TCONS\_00917704";  
protein\_coding"; old "TCONS\_00918177";  
protein\_coding"; old "TCONS\_00918186";  
protein\_coding"; old "TCONS\_00920535";  
protein\_coding"; old "TCONS\_00920539";  
protein\_coding"; old "TCONS\_00920539";  
protein\_coding"; old "TCONS\_00920921";  
protein\_coding"; old "TCONS\_00920921";  
protein\_coding"; old "TCONS\_00921643";  
protein\_coding"; old "TCONS\_00921644";  
protein\_coding"; old "TCONS\_00921932";  
protein\_coding"; old "TCONS\_00921932";  
protein\_coding"; old "TCONS\_00922132";  
protein\_coding"; old "TCONS\_00922132";  
protein\_coding"; old "TCONS\_00922132";

protein\_coding"; old "TCONS\_00921968";  
protein\_coding"; old "TCONS\_00921968";  
protein\_coding"; old "TCONS\_00922044";  
protein\_coding"; old "TCONS\_00922044";  
protein\_coding"; old "TCONS\_00922043";  
protein\_coding"; old "TCONS\_00922043";  
protein\_coding"; old "TCONS\_00922043";  
protein\_coding"; old "TCONS\_00922042";  
protein\_coding"; old "TCONS\_00922042";  
protein\_coding"; old "TCONS\_00922042";  
protein\_coding"; old "TCONS\_00923196";  
protein\_coding"; old "TCONS\_00923158";  
protein\_coding"; old "TCONS\_00923157";  
protein\_coding"; old "TCONS\_00923169";  
protein\_coding"; old "TCONS\_00923169";



protein\_coding"; old "TCONS\_00925349";  
protein\_coding"; old "TCONS\_00924179";  
protein\_coding"; old "TCONS\_00924179";  
protein\_coding"; old "TCONS\_00924178";  
protein\_coding"; old "TCONS\_00924178";  
protein\_coding"; old "TCONS\_00926243";  
protein\_coding"; old "TCONS\_00926243";  
protein\_coding"; old "TCONS\_00926243";  
protein\_coding"; old "TCONS\_00926519";  
protein\_coding"; old "TCONS\_00926519";  
protein\_coding"; old "TCONS\_00926119";  
protein\_coding"; old "TCONS\_00926119";  
protein\_coding"; old "TCONS\_00926118";  
protein\_coding"; old "TCONS\_00926118";  
protein\_coding"; old "TCONS\_00926165";  
protein\_coding"; old "TCONS\_00926165";  
protein\_coding"; old "TCONS\_00927906";  
protein\_coding"; old "TCONS\_00927906";  
protein\_coding"; old "TCONS\_00927947";  
protein\_coding"; old "TCONS\_00927947";  
protein\_coding"; old "TCONS\_00929598";  
protein\_coding"; old "TCONS\_00930008";  
protein\_coding"; old "TCONS\_00930008";  
protein\_coding"; old "TCONS\_00930062";  
protein\_coding"; old "TCONS\_00930062";  
protein\_coding"; old "TCONS\_00930062";  
protein\_coding"; old "TCONS\_00930061";  
protein\_coding"; old "TCONS\_00930061";  
protein\_coding"; old "TCONS\_00930061";  
protein\_coding"; old "TCONS\_00930061";  
protein\_coding"; old "TCONS\_00930345";



protein\_coding"; old "TCONS\_00931118";  
protein\_coding"; old "TCONS\_00931118";  
protein\_coding"; old "TCONS\_00931118";  
protein\_coding"; old "TCONS\_00931118";  
protein\_coding"; old "TCONS\_00931706";  
protein\_coding"; old "TCONS\_00931706";  
protein\_coding"; old "TCONS\_00931706";  
protein\_coding"; old "TCONS\_00931706";  
protein\_coding"; old "TCONS\_00931119";  
protein\_coding"; old "TCONS\_00932383";  
protein\_coding"; old "TCONS\_00932383";  
protein\_coding"; old "TCONS\_00932383";  
protein\_coding"; old "TCONS\_00932383";  
protein\_coding"; old "TCONS\_00931120";  
protein\_coding"; old "TCONS\_00931120";  
protein\_coding"; old "TCONS\_00931120";  
protein\_coding"; old "TCONS\_00931120";  
protein\_coding"; old "TCONS\_00931348";  
protein\_coding"; old "TCONS\_00931348";  
protein\_coding"; old "TCONS\_00931348";  
protein\_coding"; old "TCONS\_00931348";  
protein\_coding"; old "TCONS\_00931638";  
protein\_coding"; old "TCONS\_00931638";  
protein\_coding"; old "TCONS\_00931638";  
protein\_coding"; old "TCONS\_00931944";  
protein\_coding"; old "TCONS\_00933780";  
protein\_coding"; old "TCONS\_00933780";



protein\_coding"; old "TCONS\_00933559";  
protein\_coding"; old "TCONS\_00933564";  
protein\_coding"; old "TCONS\_00933564";  
protein\_coding"; old "TCONS\_00933564";  
protein\_coding"; old "TCONS\_00933478";  
protein\_coding"; old "TCONS\_00935180";  
protein\_coding"; old "TCONS\_00935889";  
protein\_coding"; old "TCONS\_00935889";  
protein\_coding"; old "TCONS\_00935889";  
protein\_coding"; old "TCONS\_00936466";  
protein\_coding"; old "TCONS\_00936466";  
protein\_coding"; old "TCONS\_00936699";  
protein\_coding"; old "TCONS\_00936699";  
protein\_coding"; old "TCONS\_00935539";  
protein\_coding"; old "TCONS\_00935539";  
protein\_coding"; old "TCONS\_00935539";  
protein\_coding"; old "TCONS\_00936712";  
protein\_coding"; old "TCONS\_00935593";  
protein\_coding"; old "TCONS\_00935593";  
protein\_coding"; old "TCONS\_00935593";  
protein\_coding"; old "TCONS\_00935592";  
protein\_coding"; old "TCONS\_00935592";



protein\_coding"; old "TCONS\_00935592";  
protein\_coding"; old "TCONS\_00935592";  
protein\_coding"; old "TCONS\_00935676";  
protein\_coding"; old "TCONS\_00935676";  
protein\_coding"; old "TCONS\_00935676";  
protein\_coding"; old "TCONS\_00936011";  
protein\_coding"; old "TCONS\_00936011";  
protein\_coding"; old "TCONS\_00935760";  
protein\_coding"; old "TCONS\_00935760";  
protein\_coding"; old "TCONS\_00935760";  
protein\_coding"; old "TCONS\_00937996";  
protein\_coding"; old "TCONS\_00937996";  
protein\_coding"; old "TCONS\_00937996";  
protein\_coding"; old "TCONS\_00937849";  
protein\_coding"; old "TCONS\_00937849";  
protein\_coding"; old "TCONS\_00938410";  
protein\_coding"; old "TCONS\_00938410";  
protein\_coding"; old "TCONS\_00938821";  
protein\_coding"; old "TCONS\_00938821";  
protein\_coding"; old "TCONS\_00939826";  
protein\_coding"; old "TCONS\_00939826";  
protein\_coding"; old "TCONS\_00940131";  
protein\_coding"; old "TCONS\_00940128";  
protein\_coding"; old "TCONS\_00940128";  
protein\_coding"; old "TCONS\_00940128";  
protein\_coding"; old "TCONS\_00940128";  
protein\_coding"; old "TCONS\_00940128";

protein\_coding"; old "TCONS\_00940128";  
protein\_coding"; old "TCONS\_00940128";  
protein\_coding"; old "TCONS\_00940128";  
protein\_coding"; old "TCONS\_00939258";  
protein\_coding"; old "TCONS\_00939258";  
protein\_coding"; old "TCONS\_00939279";  
protein\_coding"; old "TCONS\_00939279";  
protein\_coding"; old "TCONS\_00939279";  
protein\_coding"; old "TCONS\_00939280";  
protein\_coding"; old "TCONS\_00939280";  
protein\_coding"; old "TCONS\_00941115";  
protein\_coding"; old "TCONS\_00941698";  
protein\_coding"; old "TCONS\_00941698";  
protein\_coding"; old "TCONS\_00942512";  
protein\_coding"; old "TCONS\_00942512";  
protein\_coding"; old "TCONS\_00942512";  
protein\_coding"; old "TCONS\_00942514";  
protein\_coding"; old "TCONS\_00942514";  
protein\_coding"; old "TCONS\_00942514";  
protein\_coding"; old "TCONS\_00942514";  
protein\_coding"; old "TCONS\_00942513";  
protein\_coding"; old "TCONS\_00942513";  
protein\_coding"; old "TCONS\_00942513";  
protein\_coding"; old "TCONS\_00942513";  
protein\_coding"; old "TCONS\_00942515";  
protein\_coding"; old "TCONS\_00942515";  
protein\_coding"; old "TCONS\_00942515";  
protein\_coding"; old "TCONS\_00942515";  
protein\_coding"; old "TCONS\_00942621";  
protein\_coding"; old "TCONS\_00942621";  
protein\_coding"; old "TCONS\_00942621";

protein\_coding"; old "TCONS\_00944091";  
protein\_coding"; old "TCONS\_00944091";  
protein\_coding"; old "TCONS\_00944090";  
protein\_coding"; old "TCONS\_00944090";  
protein\_coding"; old "TCONS\_00944099";  
protein\_coding"; old "TCONS\_00944117";  
protein\_coding"; old "TCONS\_00944110";  
protein\_coding"; old "TCONS\_00944110";  
protein\_coding"; old "TCONS\_00944110";  
protein\_coding"; old "TCONS\_00944110";  
protein\_coding"; old "TCONS\_00944111";  
protein\_coding"; old "TCONS\_00944111";  
protein\_coding"; old "TCONS\_00944111";  
protein\_coding"; old "TCONS\_00945438";  
protein\_coding"; old "TCONS\_00945438";  
protein\_coding"; old "TCONS\_00945438";  
protein\_coding"; old "TCONS\_00946798";  
protein\_coding"; old "TCONS\_00946827";  
protein\_coding"; old "TCONS\_00947509";  
protein\_coding"; old "TCONS\_00949826";  
protein\_coding"; old "TCONS\_00949826";  
protein\_coding"; old "TCONS\_00949826";  
protein\_coding"; old "TCONS\_00949826";  
protein\_coding"; old "TCONS\_00949765";  
protein\_coding"; old "TCONS\_00949765";  
protein\_coding"; old "TCONS\_00949765";



protein\_coding"; old "TCONS\_00950292";  
protein\_coding"; old "TCONS\_00950373";  
protein\_coding"; old "TCONS\_00950373";  
protein\_coding"; old "TCONS\_00951806";  
protein\_coding"; old "TCONS\_00953189";  
protein\_coding"; old "TCONS\_00953769";  
protein\_coding"; old "TCONS\_00953769";  
protein\_coding"; old "TCONS\_00954098";  
protein\_coding"; old "TCONS\_00954098";  
protein\_coding"; old "TCONS\_00954098";  
protein\_coding"; old "TCONS\_00954098";  
protein\_coding"; old "TCONS\_00954448";  
protein\_coding"; old "TCONS\_00954448";  
protein\_coding"; old "TCONS\_00954448";  
protein\_coding"; old "TCONS\_00954652";  
protein\_coding"; old "TCONS\_00954652";  
protein\_coding"; old "TCONS\_00954652";  
protein\_coding"; old "TCONS\_00954589";  
protein\_coding"; old "TCONS\_00954591";  
protein\_coding"; old "TCONS\_00954591";  
protein\_coding"; old "TCONS\_00954591";  
protein\_coding"; old "TCONS\_00954591";  
protein\_coding"; old "TCONS\_00954526";  
protein\_coding"; old "TCONS\_00954526";  
protein\_coding"; old "TCONS\_00954526";  
protein\_coding"; old "TCONS\_00954526";  
protein\_coding"; old "TCONS\_00954599";  
protein\_coding"; old "TCONS\_00954599";  
protein\_coding"; old "TCONS\_00954599";  
protein\_coding"; old "TCONS\_00954727";  
protein\_coding"; old "TCONS\_00954727";











protein\_coding"; old "TCONS\_00961752";  
protein\_coding"; old "TCONS\_00961752";  
protein\_coding"; old "TCONS\_00962534";  
protein\_coding"; old "TCONS\_00962534";  
protein\_coding"; old "TCONS\_00962533";  
protein\_coding"; old "TCONS\_00962533";  
protein\_coding"; old "TCONS\_00962536";  
protein\_coding"; old "TCONS\_00962536";  
protein\_coding"; old "TCONS\_00962536";  
protein\_coding"; old "TCONS\_00962536";  
protein\_coding"; old "TCONS\_00962808";  
protein\_coding"; old "TCONS\_00962808";  
protein\_coding"; old "TCONS\_00962808";  
protein\_coding"; old "TCONS\_00962808";  
protein\_coding"; old "TCONS\_00962942";  
protein\_coding"; old "TCONS\_00962942";  
protein\_coding"; old "TCONS\_00962942";  
protein\_coding"; old "TCONS\_00962941";  
protein\_coding"; old "TCONS\_00962941";  
protein\_coding"; old "TCONS\_00962941";  
protein\_coding"; old "TCONS\_00962550";  
protein\_coding"; old "TCONS\_00962550";  
protein\_coding"; old "TCONS\_00962550";  
protein\_coding"; old "TCONS\_00962550";  
protein\_coding"; old "TCONS\_00962706";  
protein\_coding"; old "TCONS\_00962706";  
protein\_coding"; old "TCONS\_00962558";  
protein\_coding"; old "TCONS\_00962577";  
protein\_coding"; old "TCONS\_00962577";  
protein\_coding"; old "TCONS\_00962577";  
protein\_coding"; old "TCONS\_00962577";  
protein\_coding"; old "TCONS\_00962954";  
protein\_coding"; old "TCONS\_00962954";  
protein\_coding"; old "TCONS\_00962954";  
protein\_coding"; old "TCONS\_00962724";







protein\_coding"; old "TCONS\_00964746";  
protein\_coding"; old "TCONS\_00964746";  
protein\_coding"; old "TCONS\_00964746";  
protein\_coding"; old "TCONS\_00964898";  
"protein\_coding"; old "TCONS\_00964898";  
protein\_coding"; old "TCONS\_00964835";  
"protein\_coding"; old "TCONS\_00964835";  
protein\_coding"; old "TCONS\_00964803";  
protein\_coding"; old "TCONS\_00964803";  
protein\_coding"; old "TCONS\_00964803";  
protein\_coding"; old "TCONS\_00966254";  
protein\_coding"; old "TCONS\_00966254";  
protein\_coding"; old "TCONS\_00966436";  
protein\_coding"; old "TCONS\_00966436";  
protein\_coding"; old "TCONS\_00967117";  
protein\_coding"; old "TCONS\_00966931";  
protein\_coding"; old "TCONS\_00966931";  
protein\_coding"; old "TCONS\_00967085";  
protein\_coding"; old "TCONS\_00967085";

protein\_coding"; old "TCONS\_00967085";  
protein\_coding"; old "TCONS\_00966966";  
protein\_coding"; old "TCONS\_00966966";  
protein\_coding"; old "TCONS\_00966966";  
protein\_coding"; old "TCONS\_00967429";  
protein\_coding"; old "TCONS\_00967429";  
protein\_coding"; old "TCONS\_00967429";  
protein\_coding"; old "TCONS\_00967372";  
protein\_coding"; old "TCONS\_00967372";  
protein\_coding"; old "TCONS\_00969001";  
protein\_coding"; old "TCONS\_00969001";  
protein\_coding"; old "TCONS\_00969001";  
protein\_coding"; old "TCONS\_00969198";  
protein\_coding"; old "TCONS\_00969198";  
protein\_coding"; old "TCONS\_00968961";  
protein\_coding"; old "TCONS\_00968961";  
protein\_coding"; old "TCONS\_00968965";  
protein\_coding"; old "TCONS\_00968993";  
protein\_coding"; old "TCONS\_00968993";  
protein\_coding"; old "TCONS\_00968993";  
protein\_coding"; old "TCONS\_00969386";  
protein\_coding"; old "TCONS\_00969386";  
protein\_coding"; old "TCONS\_00969386";  
protein\_coding"; old "TCONS\_00969385";  
protein\_coding"; old "TCONS\_00969385";  
protein\_coding"; old "TCONS\_00970957";  
protein\_coding"; old "TCONS\_00970957";  
protein\_coding"; old "TCONS\_00970957";  
protein\_coding"; old "TCONS\_00970957";  
protein\_coding"; old "TCONS\_00970962";

protein\_coding"; old "TCONS\_00970962";  
protein\_coding"; old "TCONS\_00970974";  
protein\_coding"; old "TCONS\_00971934";  
protein\_coding"; old "TCONS\_00971934";  
protein\_coding"; old "TCONS\_00974289";  
protein\_coding"; old "TCONS\_00976354";  
protein\_coding"; old "TCONS\_00976354";  
protein\_coding"; old "TCONS\_00976359";  
protein\_coding"; old "TCONS\_00976980";  
protein\_coding"; old "TCONS\_00976980";  
protein\_coding"; old "TCONS\_00976980";  
protein\_coding"; old "TCONS\_00976980";  
protein\_coding"; old "TCONS\_00976979";  
protein\_coding"; old "TCONS\_00976979";  
protein\_coding"; old "TCONS\_00976979";  
protein\_coding"; old "TCONS\_00976979";  
protein\_coding"; old "TCONS\_00978119";  
protein\_coding"; old "TCONS\_00978119";  
protein\_coding"; old "TCONS\_00978119";  
protein\_coding"; old "TCONS\_00976718";  
protein\_coding"; old "TCONS\_00976718";  
protein\_coding"; old "TCONS\_00977995";  
protein\_coding"; old "TCONS\_00977995";  
protein\_coding"; old "TCONS\_00977995";  
protein\_coding"; old "TCONS\_00977995";  
protein\_coding"; old "TCONS\_00977760";  
protein\_coding"; old "TCONS\_00977760";



protein\_coding"; old "TCONS\_00976766";  
protein\_coding"; old "TCONS\_00976766";  
protein\_coding"; old "TCONS\_00976766";  
protein\_coding"; old "TCONS\_00977277";  
protein\_coding"; old "TCONS\_00977277";  
protein\_coding"; old "TCONS\_00977277";  
protein\_coding"; old "TCONS\_00977277";  
protein\_coding"; old "TCONS\_00978921";  
protein\_coding"; old "TCONS\_00978921";  
protein\_coding"; old "TCONS\_00979369";  
protein\_coding"; old "TCONS\_00979369";  
protein\_coding"; old "TCONS\_00979445";  
protein\_coding"; old "TCONS\_00979445";  
protein\_coding"; old "TCONS\_00979445";  
protein\_coding"; old "TCONS\_00979374";  
protein\_coding"; old "TCONS\_00979374";  
protein\_coding"; old "TCONS\_00979374";  
protein\_coding"; old "TCONS\_00979374";  
protein\_coding"; old "TCONS\_00979654";  
protein\_coding"; old "TCONS\_00979654";  
protein\_coding"; old "TCONS\_00980715";  
protein\_coding"; old "TCONS\_00980779";  
protein\_coding"; old "TCONS\_00980779";  
protein\_coding"; old "TCONS\_00980576";  
protein\_coding"; old "TCONS\_00980576";  
protein\_coding"; old "TCONS\_00980615";  
protein\_coding"; old "TCONS\_00983211";  
protein\_coding"; old "TCONS\_00983211";  
protein\_coding"; old "TCONS\_00983211";  
protein\_coding"; old "TCONS\_00983211";  
protein\_coding"; old "TCONS\_00983121";  
protein\_coding"; old "TCONS\_00983121";  
protein\_coding"; old "TCONS\_00983845";  
protein\_coding"; old "TCONS\_00983705";  
protein\_coding"; old "TCONS\_00984517";

protein\_coding"; old "TCONS\_00984517";  
protein\_coding"; old "TCONS\_00984517";  
protein\_coding"; old "TCONS\_00985455";  
protein\_coding"; old "TCONS\_00985455";  
protein\_coding"; old "TCONS\_00985403";  
protein\_coding"; old "TCONS\_00985403";  
protein\_coding"; old "TCONS\_00985968";  
protein\_coding"; old "TCONS\_00985968";  
protein\_coding"; old "TCONS\_00985968";  
protein\_coding"; old "TCONS\_00985844";  
protein\_coding"; old "TCONS\_00985844";  
protein\_coding"; old "TCONS\_00985846";  
protein\_coding"; old "TCONS\_00986903";  
protein\_coding"; old "TCONS\_00986903";  
protein\_coding"; old "TCONS\_00987292";  
protein\_coding"; old "TCONS\_00989266";  
protein\_coding"; old "TCONS\_00987881";  
protein\_coding"; old "TCONS\_00987881";  
protein\_coding"; old "TCONS\_00987882";  
protein\_coding"; old "TCONS\_00987882";  
protein\_coding"; old "TCONS\_00992755";  
protein\_coding"; old "TCONS\_00992755";  
protein\_coding"; old "TCONS\_00993295";  
protein\_coding"; old "TCONS\_00993295";  
protein\_coding"; old "TCONS\_00994393";  
protein\_coding"; old "TCONS\_00994632";  
protein\_coding"; old "TCONS\_00994632";  
protein\_coding"; old "TCONS\_00994632";  
protein\_coding"; old "TCONS\_00994695";  
protein\_coding"; old "TCONS\_00994695";  
protein\_coding"; old "TCONS\_00994833";  
protein\_coding"; old "TCONS\_00994833";  
protein\_coding"; old "TCONS\_00994833";  
protein\_coding"; old "TCONS\_00994833";  
protein\_coding"; old "TCONS\_00994832";





protein\_coding"; old "TCONS\_01001193";  
protein\_coding"; old "TCONS\_01001193";  
protein\_coding"; old "TCONS\_01001193";  
protein\_coding"; old "TCONS\_01001193";  
protein\_coding"; old "TCONS\_01001545";  
protein\_coding"; old "TCONS\_01001545";  
protein\_coding"; old "TCONS\_01004078";  
protein\_coding"; old "TCONS\_01004078";  
protein\_coding"; old "TCONS\_01004480";  
protein\_coding"; old "TCONS\_01004480";  
protein\_coding"; old "TCONS\_01005538";  
protein\_coding"; old "TCONS\_01005538";  
protein\_coding"; old "TCONS\_01005538";  
protein\_coding"; old "TCONS\_01005018";  
protein\_coding"; old "TCONS\_01005018";  
protein\_coding"; old "TCONS\_01005029";  
protein\_coding"; old "TCONS\_01005029";  
protein\_coding"; old "TCONS\_01005029";  
protein\_coding"; old "TCONS\_01005030";  
protein\_coding"; old "TCONS\_01005030";  
protein\_coding"; old "TCONS\_01005030";  
protein\_coding"; old "TCONS\_01006527";  
protein\_coding"; old "TCONS\_01007692";  
protein\_coding"; old "TCONS\_01007692";  
protein\_coding"; old "TCONS\_01007692";  
protein\_coding"; old "TCONS\_01007692";  
protein\_coding"; old "TCONS\_01007694";  
protein\_coding"; old "TCONS\_01007697";  
protein\_coding"; old "TCONS\_01007697";  
protein\_coding"; old "TCONS\_01007697";  
protein\_coding"; old "TCONS\_01007798";

protein\_coding"; old "TCONS\_01007798";  
protein\_coding"; old "TCONS\_01007798";  
protein\_coding"; old "TCONS\_01007798";  
protein\_coding"; old "TCONS\_01007963";  
protein\_coding"; old "TCONS\_01008627";  
protein\_coding"; old "TCONS\_01007800";  
protein\_coding"; old "TCONS\_01009550";  
protein\_coding"; old "TCONS\_01009322";  
protein\_coding"; old "TCONS\_01009322";  
protein\_coding"; old "TCONS\_01009322";  
protein\_coding"; old "TCONS\_01009045";  
protein\_coding"; old "TCONS\_01009045";  
protein\_coding"; old "TCONS\_01009045";  
protein\_coding"; old "TCONS\_01009657";  
protein\_coding"; old "TCONS\_01009666";  
protein\_coding"; old "TCONS\_01009666";











protein\_coding"; old "TCONS\_01017245";  
protein\_coding"; old "TCONS\_01017245";  
protein\_coding"; old "TCONS\_01017245";  
protein\_coding"; old "TCONS\_01017460";  
protein\_coding"; old "TCONS\_01017460";  
protein\_coding"; old "TCONS\_01018666";  
protein\_coding"; old "TCONS\_01018860";  
protein\_coding"; old "TCONS\_01019193";  
protein\_coding"; old "TCONS\_01018690";  
protein\_coding"; old "TCONS\_01018690";  
protein\_coding"; old "TCONS\_01018690";  
protein\_coding"; old "TCONS\_01018887";  
protein\_coding"; old "TCONS\_01018887";  
protein\_coding"; old "TCONS\_01018887";  
protein\_coding"; old "TCONS\_01018887";  
protein\_coding"; old "TCONS\_01018688";  
protein\_coding"; old "TCONS\_01018688";  
protein\_coding"; old "TCONS\_01018730";  
protein\_coding"; old "TCONS\_01019561";  
protein\_coding"; old "TCONS\_01019768";  
protein\_coding"; old "TCONS\_01019782";  
protein\_coding"; old "TCONS\_01019782";  
protein\_coding"; old "TCONS\_01019782";  
protein\_coding"; old "TCONS\_01021971";  
protein\_coding"; old "TCONS\_01022205";  
protein\_coding"; old "TCONS\_01022395";  
protein\_coding"; old "TCONS\_01022395";  
protein\_coding"; old "TCONS\_01022395";  
protein\_coding"; old "TCONS\_01022469";  
protein\_coding"; old "TCONS\_01022469";  
protein\_coding"; old "TCONS\_01022628";













protein\_coding"; old "TCONS\_01032955";  
protein\_coding"; old "TCONS\_01032955";  
protein\_coding"; old "TCONS\_01032962";  
protein\_coding"; old "TCONS\_01032962";  
protein\_coding"; old "TCONS\_01033572";  
protein\_coding"; old "TCONS\_01033572";  
protein\_coding"; old "TCONS\_01033870";  
protein\_coding"; old "TCONS\_01034028";  
protein\_coding"; old "TCONS\_01034028";  
protein\_coding"; old "TCONS\_01034027";  
protein\_coding"; old "TCONS\_01034027";  
protein\_coding"; old "TCONS\_01034027";  
protein\_coding"; old "TCONS\_01034032";  
protein\_coding"; old "TCONS\_01034032";  
protein\_coding"; old "TCONS\_01034367";  
protein\_coding"; old "TCONS\_01034433";  
protein\_coding"; old "TCONS\_01034428";  
protein\_coding"; old "TCONS\_01034428";  
protein\_coding"; old "TCONS\_01034428";  
protein\_coding"; old "TCONS\_01034671";  
protein\_coding"; old "TCONS\_01034671";  
protein\_coding"; old "TCONS\_01037378";  
protein\_coding"; old "TCONS\_01037378";  
protein\_coding"; old "TCONS\_01037131";  
protein\_coding"; old "TCONS\_01037131";  
protein\_coding"; old "TCONS\_01037131";  
protein\_coding"; old "TCONS\_01037193";  
protein\_coding"; old "TCONS\_01037710";  
protein\_coding"; old "TCONS\_01037710";  
protein\_coding"; old "TCONS\_01037710";  
protein\_coding"; old "TCONS\_01037235";

protein\_coding"; old "TCONS\_01037235";  
protein\_coding"; old "TCONS\_01037235";  
protein\_coding"; old "TCONS\_01037235";  
protein\_coding"; old "TCONS\_01037234";  
protein\_coding"; old "TCONS\_01037234";  
protein\_coding"; old "TCONS\_01037234";  
protein\_coding"; old "TCONS\_01037234";  
protein\_coding"; old "TCONS\_01037472";  
protein\_coding"; old "TCONS\_01037472";  
protein\_coding"; old "TCONS\_01037472";  
protein\_coding"; old "TCONS\_01038787";  
protein\_coding"; old "TCONS\_01038787";  
protein\_coding"; old "TCONS\_01039093";  
protein\_coding"; old "TCONS\_01039093";  
protein\_coding"; old "TCONS\_01039093";  
protein\_coding"; old "TCONS\_01039093";  
protein\_coding"; old "TCONS\_01039352";  
protein\_coding"; old "TCONS\_01039419";  
protein\_coding"; old "TCONS\_01039452";  
protein\_coding"; old "TCONS\_01039452";  
protein\_coding"; old "TCONS\_01039452";  
protein\_coding"; old "TCONS\_01039479";  
protein\_coding"; old "TCONS\_01039550";  
protein\_coding"; old "TCONS\_01039550";  
protein\_coding"; old "TCONS\_01039551";  
protein\_coding"; old "TCONS\_01039551";

protein\_coding"; old "TCONS\_01039573";  
protein\_coding"; old "TCONS\_01039573";  
protein\_coding"; old "TCONS\_01039555";  
protein\_coding"; old "TCONS\_01039555";  
protein\_coding"; old "TCONS\_01039819";  
protein\_coding"; old "TCONS\_01039819";  
protein\_coding"; old "TCONS\_01039818";  
protein\_coding"; old "TCONS\_01039818";  
protein\_coding"; old "TCONS\_01041462";  
protein\_coding"; old "TCONS\_01041462";  
protein\_coding"; old "TCONS\_01041462";  
protein\_coding"; old "TCONS\_01042307";  
protein\_coding"; old "TCONS\_01042307";  
protein\_coding"; old "TCONS\_01042307";  
protein\_coding"; old "TCONS\_01042307";  
protein\_coding"; old "TCONS\_01041245";  
protein\_coding"; old "TCONS\_01042039";  
protein\_coding"; old "TCONS\_01042039";  
protein\_coding"; old "TCONS\_01042039";  
protein\_coding"; old "TCONS\_01043585";  
protein\_coding"; old "TCONS\_01043585";  
protein\_coding"; old "TCONS\_01043589";  
protein\_coding"; old "TCONS\_01043589";  
protein\_coding"; old "TCONS\_01043767";  
protein\_coding"; old "TCONS\_01043767";  
protein\_coding"; old "TCONS\_01043799";  
protein\_coding"; old "TCONS\_01043799";  
protein\_coding"; old "TCONS\_01044366";  
protein\_coding"; old "TCONS\_01044366";

protein\_coding"; old "TCONS\_01045144";  
protein\_coding"; old "TCONS\_01045378";  
protein\_coding"; old "TCONS\_01045378";  
protein\_coding"; old "TCONS\_01045611";  
protein\_coding"; old "TCONS\_01045611";  
protein\_coding"; old "TCONS\_01045576";  
protein\_coding"; old "TCONS\_01045576";  
protein\_coding"; old "TCONS\_01045558";  
protein\_coding"; old "TCONS\_01045558";  
protein\_coding"; old "TCONS\_01045932";  
protein\_coding"; old "TCONS\_01046305";  
protein\_coding"; old "TCONS\_01046305";  
protein\_coding"; old "TCONS\_01046305";  
protein\_coding"; old "TCONS\_01046306";  
protein\_coding"; old "TCONS\_01046306";  
protein\_coding"; old "TCONS\_01046428";  
protein\_coding"; old "TCONS\_01046428";  
protein\_coding"; old "TCONS\_01046341";  
protein\_coding"; old "TCONS\_01046341";  
protein\_coding"; old "TCONS\_01046727";  
protein\_coding"; old "TCONS\_01046727";  
protein\_coding"; old "TCONS\_01046727";  
protein\_coding"; old "TCONS\_01046754";

protein\_coding"; old "TCONS\_01046754";  
protein\_coding"; old "TCONS\_01046754";  
protein\_coding"; old "TCONS\_01046754";  
protein\_coding"; old "TCONS\_01046726";  
protein\_coding"; old "TCONS\_01046726";  
protein\_coding"; old "TCONS\_01046726";  
protein\_coding"; old "TCONS\_01046726";  
protein\_coding"; old "TCONS\_01046891";  
protein\_coding"; old "TCONS\_01046891";  
protein\_coding"; old "TCONS\_01047030";  
protein\_coding"; old "TCONS\_01046988";  
protein\_coding"; old "TCONS\_01046970";  
protein\_coding"; old "TCONS\_01046970";  
protein\_coding"; old "TCONS\_01046970";  
protein\_coding"; old "TCONS\_01046970";  
protein\_coding"; old "TCONS\_01046899";  
protein\_coding"; old "TCONS\_01046899";  
protein\_coding"; old "TCONS\_01046899";  
protein\_coding"; old "TCONS\_01046899";  
protein\_coding"; old "TCONS\_01047599";  
protein\_coding"; old "TCONS\_01047599";  
protein\_coding"; old "TCONS\_01047599";  
protein\_coding"; old "TCONS\_01047599";  
protein\_coding"; old "TCONS\_01047480";

protein\_coding"; old "TCONS\_01047480";  
protein\_coding"; old "TCONS\_01047480";  
protein\_coding"; old "TCONS\_01047479";  
protein\_coding"; old "TCONS\_01047479";  
protein\_coding"; old "TCONS\_01047479";  
protein\_coding"; old "TCONS\_01047479";  
protein\_coding"; old "TCONS\_01047516";  
protein\_coding"; old "TCONS\_01047516";  
protein\_coding"; old "TCONS\_01047550";  
protein\_coding"; old "TCONS\_01047550";  
protein\_coding"; old "TCONS\_01047488";  
protein\_coding"; old "TCONS\_01047488";  
protein\_coding"; old "TCONS\_01047499";  
protein\_coding"; old "TCONS\_01047499";  
protein\_coding"; old "TCONS\_01047499";  
protein\_coding"; old "TCONS\_01047500";  
protein\_coding"; old "TCONS\_01047500";  
protein\_coding"; old "TCONS\_01047769";  
protein\_coding"; old "TCONS\_01047769";  
protein\_coding"; old "TCONS\_01048795";  
protein\_coding"; old "TCONS\_01048795";  
protein\_coding"; old "TCONS\_01048797";  
protein\_coding"; old "TCONS\_01048797";  
protein\_coding"; old "TCONS\_01049055";  
protein\_coding"; old "TCONS\_01049055";  
protein\_coding"; old "TCONS\_01049652";  
protein\_coding"; old "TCONS\_01049652";  
protein\_coding"; old "TCONS\_01049652";  
protein\_coding"; old "TCONS\_01050503";  
protein\_coding"; old "TCONS\_01050503";  
protein\_coding"; old "TCONS\_01051534";  
protein\_coding"; old "TCONS\_01051534";  
protein\_coding"; old "TCONS\_01052341";  
protein\_coding"; old "TCONS\_01052341";  
protein\_coding"; old "TCONS\_01052341";

protein\_coding"; old "TCONS\_01052341";  
protein\_coding"; old "TCONS\_01053538";  
protein\_coding"; old "TCONS\_01053557";  
protein\_coding"; old "TCONS\_01053557";  
protein\_coding"; old "TCONS\_01054131";  
protein\_coding"; old "TCONS\_01054131";  
protein\_coding"; old "TCONS\_01054193";  
protein\_coding"; old "TCONS\_01054193";  
protein\_coding"; old "TCONS\_01056155";  
protein\_coding"; old "TCONS\_01057171";  
protein\_coding"; old "TCONS\_01057171";  
protein\_coding"; old "TCONS\_01057439";  
protein\_coding"; old "TCONS\_01057439";  
protein\_coding"; old "TCONS\_01058297";  
protein\_coding"; old "TCONS\_01058565";  
protein\_coding"; old "TCONS\_01058565";  
protein\_coding"; old "TCONS\_01058566";  
protein\_coding"; old "TCONS\_01058557";  
protein\_coding"; old "TCONS\_01058548";  
protein\_coding"; old "TCONS\_01058548";  
protein\_coding"; old "TCONS\_01058548";  
protein\_coding"; old "TCONS\_01058548";  
protein\_coding"; old "TCONS\_01058552";  
protein\_coding"; old "TCONS\_01058552";  
protein\_coding"; old "TCONS\_01059105";  
protein\_coding"; old "TCONS\_01059105";  
protein\_coding"; old "TCONS\_01059105";





"protein\_coding"; old "TCONS\_01062938";  
protein\_coding"; old "TCONS\_01062959";  
"protein\_coding"; old "TCONS\_01062959";  
protein\_coding"; old "TCONS\_01063225";  
protein\_coding"; old "TCONS\_01063225";  
protein\_coding"; old "TCONS\_01063225";  
protein\_coding"; old "TCONS\_01063311";  
protein\_coding"; old "TCONS\_01063311";  
protein\_coding"; old "TCONS\_01064322";  
protein\_coding"; old "TCONS\_01064322";  
protein\_coding"; old "TCONS\_01064322";  
protein\_coding"; old "TCONS\_01064222";  
protein\_coding"; old "TCONS\_01064222";  
protein\_coding"; old "TCONS\_01064830";

protein\_coding"; old "TCONS\_01064830";  
protein\_coding"; old "TCONS\_01064875";  
protein\_coding"; old "TCONS\_01064875";  
protein\_coding"; old "TCONS\_01064875";  
protein\_coding"; old "TCONS\_01065437";  
protein\_coding"; old "TCONS\_01065437";  
protein\_coding"; old "TCONS\_01065457";  
protein\_coding"; old "TCONS\_01065457";  
protein\_coding"; old "TCONS\_01065457";  
protein\_coding"; old "TCONS\_01065434";  
protein\_coding"; old "TCONS\_01065434";  
protein\_coding"; old "TCONS\_01065434";  
protein\_coding"; old "TCONS\_01065599";  
protein\_coding"; old "TCONS\_01066105";  
protein\_coding"; old "TCONS\_01066105";  
protein\_coding"; old "TCONS\_01066116";  
protein\_coding"; old "TCONS\_01066114";  
protein\_coding"; old "TCONS\_01066114";  
protein\_coding"; old "TCONS\_01066114";  
protein\_coding"; old "TCONS\_01066114";  
protein\_coding"; old "TCONS\_01066486";  
protein\_coding"; old "TCONS\_01066486";  
protein\_coding"; old "TCONS\_01067075";  
protein\_coding"; old "TCONS\_01067075";  
protein\_coding"; old "TCONS\_01067075";



protein\_coding"; old "TCONS\_01067098";  
protein\_coding"; old "TCONS\_01067098";  
protein\_coding"; old "TCONS\_01067098";  
protein\_coding"; old "TCONS\_01067203";  
protein\_coding"; old "TCONS\_01067203";  
protein\_coding"; old "TCONS\_01067516";  
protein\_coding"; old "TCONS\_01067516";  
protein\_coding"; old "TCONS\_01067516";  
protein\_coding"; old "TCONS\_01067516";  
protein\_coding"; old "TCONS\_01067551";  
protein\_coding"; old "TCONS\_01067551";  
protein\_coding"; old "TCONS\_01067612";  
protein\_coding"; old "TCONS\_01067612";  
protein\_coding"; old "TCONS\_01067611";  
protein\_coding"; old "TCONS\_01067611";  
protein\_coding"; old "TCONS\_01070110";  
protein\_coding"; old "TCONS\_01070110";  
protein\_coding"; old "TCONS\_01070538";  
protein\_coding"; old "TCONS\_01070538";  
protein\_coding"; old "TCONS\_01071059";  
protein\_coding"; old "TCONS\_01071059";  
protein\_coding"; old "TCONS\_01071059";  
protein\_coding"; old "TCONS\_01071718";  
protein\_coding"; old "TCONS\_01071718";  
protein\_coding"; old "TCONS\_01071718";  
protein\_coding"; old "TCONS\_01071719";  
protein\_coding"; old "TCONS\_01071719";  
protein\_coding"; old "TCONS\_01071719";  
protein\_coding"; old "TCONS\_01071730";  
protein\_coding"; old "TCONS\_01071820";  
protein\_coding"; old "TCONS\_01071833";  
protein\_coding"; old "TCONS\_01071833";  
protein\_coding"; old "TCONS\_01071982";  
protein\_coding"; old "TCONS\_01072831";  
protein\_coding"; old "TCONS\_01073034";



protein\_coding"; old "TCONS\_01076182";  
protein\_coding"; old "TCONS\_01075995";  
protein\_coding"; old "TCONS\_01075995";  
protein\_coding"; old "TCONS\_01075995";  
protein\_coding"; old "TCONS\_01075995";  
protein\_coding"; old "TCONS\_01075997";  
protein\_coding"; old "TCONS\_01075997";  
protein\_coding"; old "TCONS\_01075727";  
protein\_coding"; old "TCONS\_01075727";  
protein\_coding"; old "TCONS\_01076238";  
protein\_coding"; old "TCONS\_01076238";  
protein\_coding"; old "TCONS\_01076238";  
protein\_coding"; old "TCONS\_01075777";  
protein\_coding"; old "TCONS\_01075777";  
protein\_coding"; old "TCONS\_01075777";  
protein\_coding"; old "TCONS\_01076433";  
protein\_coding"; old "TCONS\_01076433";  
protein\_coding"; old "TCONS\_01076276";  
protein\_coding"; old "TCONS\_01076276";  
protein\_coding"; old "TCONS\_01076069";  
protein\_coding"; old "TCONS\_01076069";  
protein\_coding"; old "TCONS\_01076069";  
protein\_coding"; old "TCONS\_01076068";  
protein\_coding"; old "TCONS\_01076068";  
protein\_coding"; old "TCONS\_01076068";  
protein\_coding"; old "TCONS\_01076074";  
protein\_coding"; old "TCONS\_01076074";  
protein\_coding"; old "TCONS\_01075842";



protein\_coding"; old "TCONS\_01078490";  
protein\_coding"; old "TCONS\_01079345";  
protein\_coding"; old "TCONS\_01079345";  
protein\_coding"; old "TCONS\_01079345";  
protein\_coding"; old "TCONS\_01079345";  
protein\_coding"; old "TCONS\_01079325";  
protein\_coding"; old "TCONS\_01079325";  
protein\_coding"; old "TCONS\_01079331";  
protein\_coding"; old "TCONS\_01079331";  
protein\_coding"; old "TCONS\_01079331";  
protein\_coding"; old "TCONS\_01079503";  
protein\_coding"; old "TCONS\_01079899";  
protein\_coding"; old "TCONS\_01079899";  
protein\_coding"; old "TCONS\_01080667";  
protein\_coding"; old "TCONS\_01080667";  
protein\_coding"; old "TCONS\_01080660";  
protein\_coding"; old "TCONS\_01080660";  
protein\_coding"; old "TCONS\_01081781";  
protein\_coding"; old "TCONS\_01081789";  
protein\_coding"; old "TCONS\_01081989";  
protein\_coding"; old "TCONS\_01081989";  
protein\_coding"; old "TCONS\_01082109";  
protein\_coding"; old "TCONS\_01082196";  
protein\_coding"; old "TCONS\_01082196";  
protein\_coding"; old "TCONS\_01082196";  
protein\_coding"; old "TCONS\_01082196";  
protein\_coding"; old "TCONS\_01082175";  
protein\_coding"; old "TCONS\_01082175";  
protein\_coding"; old "TCONS\_01082175";



protein\_coding"; old "TCONS\_01082177";  
protein\_coding"; old "TCONS\_01082177";  
protein\_coding"; old "TCONS\_01082238";  
protein\_coding"; old "TCONS\_01082562";  
protein\_coding"; old "TCONS\_01082409";  
protein\_coding"; old "TCONS\_01082409";  
protein\_coding"; old "TCONS\_01082409";  
protein\_coding"; old "TCONS\_01082409";  
protein\_coding"; old "TCONS\_01082439";  
protein\_coding"; old "TCONS\_01082439";  
protein\_coding"; old "TCONS\_01082606";  
protein\_coding"; old "TCONS\_01082606";  
protein\_coding"; old "TCONS\_01082606";  
protein\_coding"; old "TCONS\_01082606";  
protein\_coding"; old "TCONS\_01082446";  
protein\_coding"; old "TCONS\_01082446";  
protein\_coding"; old "TCONS\_01082446";  
protein\_coding"; old "TCONS\_01082446";  
protein\_coding"; old "TCONS\_01082640";  
protein\_coding"; old "TCONS\_01082313";  
protein\_coding"; old "TCONS\_01082313";  
protein\_coding"; old "TCONS\_01082313";  
protein\_coding"; old "TCONS\_01082524";  
protein\_coding"; old "TCONS\_01082524";





protein\_coding"; old "TCONS\_01088891";  
protein\_coding"; old "TCONS\_01088891";  
protein\_coding"; old "TCONS\_01089091";  
protein\_coding"; old "TCONS\_01089428";  
protein\_coding"; old "TCONS\_01089428";  
protein\_coding"; old "TCONS\_01089428";  
protein\_coding"; old "TCONS\_01089428";  
protein\_coding"; old "TCONS\_01091409";  
protein\_coding"; old "TCONS\_01091183";  
protein\_coding"; old "TCONS\_01091059";  
protein\_coding"; old "TCONS\_01091059";  
protein\_coding"; old "TCONS\_01091059";  
protein\_coding"; old "TCONS\_01091059";  
protein\_coding"; old "TCONS\_01092424";  
protein\_coding"; old "TCONS\_01092424";  
protein\_coding"; old "TCONS\_01092436";  
protein\_coding"; old "TCONS\_01092435";  
protein\_coding"; old "TCONS\_01092435";  
protein\_coding"; old "TCONS\_01092435";  
protein\_coding"; old "TCONS\_01092435";  
protein\_coding"; old "TCONS\_01092437";  
protein\_coding"; old "TCONS\_01092437";  
protein\_coding"; old "TCONS\_01092437";  
protein\_coding"; old "TCONS\_01092437";  
protein\_coding"; old "TCONS\_01092554";  
protein\_coding"; old "TCONS\_01092554";  
protein\_coding"; old "TCONS\_01095693";

protein\_coding"; old "TCONS\_01095693";  
protein\_coding"; old "TCONS\_01095582";  
protein\_coding"; old "TCONS\_01095582";  
protein\_coding"; old "TCONS\_01095582";  
protein\_coding"; old "TCONS\_01095582";  
protein\_coding"; old "TCONS\_01096123";  
protein\_coding"; old "TCONS\_01096123";  
protein\_coding"; old "TCONS\_01096123";  
protein\_coding"; old "TCONS\_01096123";  
protein\_coding"; old "TCONS\_01095746";  
protein\_coding"; old "TCONS\_01095746";  
protein\_coding"; old "TCONS\_01096912";  
protein\_coding"; old "TCONS\_01096912";  
protein\_coding"; old "TCONS\_01096916";  
protein\_coding"; old "TCONS\_01096950";  
protein\_coding"; old "TCONS\_01097579";  
protein\_coding"; old "TCONS\_01096973";  
protein\_coding"; old "TCONS\_01096973";  
protein\_coding"; old "TCONS\_01096973";



protein\_coding"; old "TCONS\_01099914";  
protein\_coding"; old "TCONS\_01099914";  
protein\_coding"; old "TCONS\_01099912";  
protein\_coding"; old "TCONS\_01099918";  
protein\_coding"; old "TCONS\_01099918";  
protein\_coding"; old "TCONS\_01099918";  
protein\_coding"; old "TCONS\_01099918";  
protein\_coding"; old "TCONS\_01100199";  
protein\_coding"; old "TCONS\_01100199";  
protein\_coding"; old "TCONS\_01100034";  
protein\_coding"; old "TCONS\_01100034";  
protein\_coding"; old "TCONS\_01100204";  
protein\_coding"; old "TCONS\_01100043";  
protein\_coding"; old "TCONS\_01100045";  
protein\_coding"; old "TCONS\_01100492";  
protein\_coding"; old "TCONS\_01100492";  
protein\_coding"; old "TCONS\_01100097";  
protein\_coding"; old "TCONS\_01100097";  
protein\_coding"; old "TCONS\_01100102";  
protein\_coding"; old "TCONS\_01100657";  
protein\_coding"; old "TCONS\_01100657";  
protein\_coding"; old "TCONS\_01101565";  
protein\_coding"; old "TCONS\_01101569";  
protein\_coding"; old "TCONS\_01101613";  
protein\_coding"; old "TCONS\_01101613";  
protein\_coding"; old "TCONS\_01101613";  
protein\_coding"; old "TCONS\_01101613";







protein\_coding"; old "TCONS\_01101760";  
protein\_coding"; old "TCONS\_01101760";  
protein\_coding"; old "TCONS\_01101760";  
protein\_coding"; old "TCONS\_01101761";  
protein\_coding"; old "TCONS\_01101761";  
protein\_coding"; old "TCONS\_01101762";  
protein\_coding"; old "TCONS\_01101762";  
protein\_coding"; old "TCONS\_01101763";  
protein\_coding"; old "TCONS\_01101763";  
protein\_coding"; old "TCONS\_01102124";  
protein\_coding"; old "TCONS\_01101947";  
protein\_coding"; old "TCONS\_01101947";  
protein\_coding"; old "TCONS\_01101948";  
protein\_coding"; old "TCONS\_01102127";  
protein\_coding"; old "TCONS\_01102127";  
protein\_coding"; old "TCONS\_01102127";  
protein\_coding"; old "TCONS\_01101976";  
protein\_coding"; old "TCONS\_01101976";  
protein\_coding"; old "TCONS\_01102894";  
protein\_coding"; old "TCONS\_01102988";  
protein\_coding"; old "TCONS\_01103042";  
protein\_coding"; old "TCONS\_01103302";  
protein\_coding"; old "TCONS\_01103302";  
protein\_coding"; old "TCONS\_01103681";  
protein\_coding"; old "TCONS\_01103681";  
protein\_coding"; old "TCONS\_01103681";  
protein\_coding"; old "TCONS\_01103681";  
protein\_coding"; old "TCONS\_01103713";

protein\_coding"; old "TCONS\_01104014";  
protein\_coding"; old "TCONS\_01104014";  
protein\_coding"; old "TCONS\_01104014";  
protein\_coding"; old "TCONS\_01103443";  
protein\_coding"; old "TCONS\_01103717";  
protein\_coding"; old "TCONS\_01103717";  
protein\_coding"; old "TCONS\_01105416";  
protein\_coding"; old "TCONS\_01105416";  
protein\_coding"; old "TCONS\_01105416";  
protein\_coding"; old "TCONS\_01105416";  
protein\_coding"; old "TCONS\_01105417";  
protein\_coding"; old "TCONS\_01105417";  
protein\_coding"; old "TCONS\_01105417";  
protein\_coding"; old "TCONS\_01105417";  
protein\_coding"; old "TCONS\_01105261";  
protein\_coding"; old "TCONS\_01105271";  
protein\_coding"; old "TCONS\_01105307";  
protein\_coding"; old "TCONS\_01105307";  
protein\_coding"; old "TCONS\_01105356";  
protein\_coding"; old "TCONS\_01105356";  
protein\_coding"; old "TCONS\_01105356";  
protein\_coding"; old "TCONS\_01105484";  
protein\_coding"; old "TCONS\_01105484";  
protein\_coding"; old "TCONS\_01106313";  
protein\_coding"; old "TCONS\_01106313";  
protein\_coding"; old "TCONS\_01106309";







protein\_coding"; old "TCONS\_01113591";  
"protein\_coding"; old "TCONS\_01113591";  
"protein\_coding"; old "TCONS\_01113591";  
"protein\_coding"; old "TCONS\_01113591";  
"protein\_coding"; old "TCONS\_01113591";  
protein\_coding"; old "TCONS\_01113590";  
"protein\_coding"; old "TCONS\_01113590";  
"protein\_coding"; old "TCONS\_01113590";  
protein\_coding"; old "TCONS\_01113778";  
protein\_coding"; old "TCONS\_01113619";  
protein\_coding"; old "TCONS\_01113619";  
protein\_coding"; old "TCONS\_01113619";  
protein\_coding"; old "TCONS\_01113793";  
protein\_coding"; old "TCONS\_01113793";  
protein\_coding"; old "TCONS\_01113622";  
protein\_coding"; old "TCONS\_01113622";  
protein\_coding"; old "TCONS\_01113639";  
protein\_coding"; old "TCONS\_01113639";  
protein\_coding"; old "TCONS\_01114552";  
protein\_coding"; old "TCONS\_01114552";  
protein\_coding"; old "TCONS\_01115362";





protein\_coding"; old "TCONS\_01117546";  
protein\_coding"; old "TCONS\_01116875";  
protein\_coding"; old "TCONS\_01117190";  
protein\_coding"; old "TCONS\_01117190";  
protein\_coding"; old "TCONS\_01117190";  
protein\_coding"; old "TCONS\_01116896";  
protein\_coding"; old "TCONS\_01116896";  
protein\_coding"; old "TCONS\_01117063";  
protein\_coding"; old "TCONS\_01117063";  
protein\_coding"; old "TCONS\_01117063";  
protein\_coding"; old "TCONS\_01116722";  
protein\_coding"; old "TCONS\_01116722";  
protein\_coding"; old "TCONS\_01116722";  
protein\_coding"; old "TCONS\_01116726";  
protein\_coding"; old "TCONS\_01116726";  
protein\_coding"; old "TCONS\_01116726";  
protein\_coding"; old "TCONS\_01117095";  
protein\_coding"; old "TCONS\_01117095";  
protein\_coding"; old "TCONS\_01117095";  
protein\_coding"; old "TCONS\_01117946";  
protein\_coding"; old "TCONS\_01117946";  
protein\_coding"; old "TCONS\_01117946";

protein\_coding"; old "TCONS\_01118593";  
protein\_coding"; old "TCONS\_01118522";  
protein\_coding"; old "TCONS\_01118622";  
protein\_coding"; old "TCONS\_01118622";  
protein\_coding"; old "TCONS\_01118622";  
protein\_coding"; old "TCONS\_01118447";  
protein\_coding"; old "TCONS\_01118447";  
protein\_coding"; old "TCONS\_01119034";  
protein\_coding"; old "TCONS\_01119034";  
protein\_coding"; old "TCONS\_01119034";  
protein\_coding"; old "TCONS\_01119458";  
protein\_coding"; old "TCONS\_01119458";  
protein\_coding"; old "TCONS\_01119039";  
protein\_coding"; old "TCONS\_01119039";  
protein\_coding"; old "TCONS\_01119040";  
protein\_coding"; old "TCONS\_01119040";  
protein\_coding"; old "TCONS\_01119040";  
protein\_coding"; old "TCONS\_01119045";  
protein\_coding"; old "TCONS\_01119045";  
protein\_coding"; old "TCONS\_01119045";

protein\_coding"; old "TCONS\_01119045";  
protein\_coding"; old "TCONS\_01119045";  
protein\_coding"; old "TCONS\_01119045";  
protein\_coding"; old "TCONS\_01119045";  
protein\_coding"; old "TCONS\_01119471";  
protein\_coding"; old "TCONS\_01119294";  
protein\_coding"; old "TCONS\_01119294";  
protein\_coding"; old "TCONS\_01119294";  
protein\_coding"; old "TCONS\_01119072";  
protein\_coding"; old "TCONS\_01119072";  
protein\_coding"; old "TCONS\_01119072";  
protein\_coding"; old "TCONS\_01119072";  
protein\_coding"; old "TCONS\_01119295";  
protein\_coding"; old "TCONS\_01119295";  
protein\_coding"; old "TCONS\_01119295";  
protein\_coding"; old "TCONS\_01119827";  
protein\_coding"; old "TCONS\_01119827";  
protein\_coding"; old "TCONS\_01119956";  
protein\_coding"; old "TCONS\_01119956";  
protein\_coding"; old "TCONS\_01119956";  
protein\_coding"; old "TCONS\_01119090";  
protein\_coding"; old "TCONS\_01119090";  
protein\_coding"; old "TCONS\_01119090";  
protein\_coding"; old "TCONS\_01119090";  
protein\_coding"; old "TCONS\_01119678";  
protein\_coding"; old "TCONS\_01119678";  
protein\_coding"; old "TCONS\_01119513";  
protein\_coding"; old "TCONS\_01119513";  
protein\_coding"; old "TCONS\_01119513";  
protein\_coding"; old "TCONS\_01119113";  
protein\_coding"; old "TCONS\_01119113";





protein\_coding"; old "TCONS\_01119208";  
"protein\_coding"; old "TCONS\_01119208";  
"protein\_coding"; old "TCONS\_01119208";  
protein\_coding"; old "TCONS\_01119217";  
protein\_coding"; old "TCONS\_01119217";  
protein\_coding"; old "TCONS\_01119218";  
protein\_coding"; old "TCONS\_01119218";  
protein\_coding"; old "TCONS\_01119773";  
protein\_coding"; old "TCONS\_01119227";  
protein\_coding"; old "TCONS\_01119227";  
protein\_coding"; old "TCONS\_01119227";  
protein\_coding"; old "TCONS\_01119256";  
protein\_coding"; old "TCONS\_01119256";  
protein\_coding"; old "TCONS\_01120549";  
protein\_coding"; old "TCONS\_01120549";  
protein\_coding"; old "TCONS\_01120667";  
protein\_coding"; old "TCONS\_01120667";  
protein\_coding"; old "TCONS\_01120667";  
protein\_coding"; old "TCONS\_01120667";  
protein\_coding"; old "TCONS\_01120554";  
protein\_coding"; old "TCONS\_01120554";  
protein\_coding"; old "TCONS\_01120554";  
protein\_coding"; old "TCONS\_01120739";  
protein\_coding"; old "TCONS\_01120590";  
protein\_coding"; old "TCONS\_01120590";

protein\_coding"; old "TCONS\_01120590";  
protein\_coding"; old "TCONS\_01120590";  
protein\_coding"; old "TCONS\_01120590";  
protein\_coding"; old "TCONS\_01120641";  
protein\_coding"; old "TCONS\_01120641";  
protein\_coding"; old "TCONS\_01120641";  
protein\_coding"; old "TCONS\_01120641";  
protein\_coding"; old "TCONS\_01120740";  
protein\_coding"; old "TCONS\_01120740";  
protein\_coding"; old "TCONS\_01120596";  
protein\_coding"; old "TCONS\_01120596";  
protein\_coding"; old "TCONS\_01121364";  
protein\_coding"; old "TCONS\_01121364";  
protein\_coding"; old "TCONS\_01122632";  
protein\_coding"; old "TCONS\_01122632";  
protein\_coding"; old "TCONS\_01122632";  
protein\_coding"; old "TCONS\_01123370";  
protein\_coding"; old "TCONS\_01123370";  
protein\_coding"; old "TCONS\_01123581";  
protein\_coding"; old "TCONS\_01123581";  
protein\_coding"; old "TCONS\_01123581";  
protein\_coding"; old "TCONS\_01124167";  
protein\_coding"; old "TCONS\_01124167";  
protein\_coding"; old "TCONS\_01123388";  
protein\_coding"; old "TCONS\_01123388";  
protein\_coding"; old "TCONS\_01123388";  
protein\_coding"; old "TCONS\_01123388";  
protein\_coding"; old "TCONS\_01123387";  
protein\_coding"; old "TCONS\_01123597";  
protein\_coding"; old "TCONS\_01123597";  
protein\_coding"; old "TCONS\_01123597";  
protein\_coding"; old "TCONS\_01123597";





protein\_coding"; old "TCONS\_01123962";  
protein\_coding"; old "TCONS\_01123962";  
"protein\_coding"; old "TCONS\_01123962";  
"protein\_coding"; old "TCONS\_01123962";  
protein\_coding"; old "TCONS\_01123658";  
"protein\_coding"; old "TCONS\_01123658";  
"protein\_coding"; old "TCONS\_01123658";  
"protein\_coding"; old "TCONS\_01123658";  
"protein\_coding"; old "TCONS\_01123658";  
protein\_coding"; old "TCONS\_01123479";  
"protein\_coding"; old "TCONS\_01123479";  
"protein\_coding"; old "TCONS\_01123479";  
protein\_coding"; old "TCONS\_01123491";  
protein\_coding"; old "TCONS\_01123491";  
protein\_coding"; old "TCONS\_01123985";  
protein\_coding"; old "TCONS\_01123985";  
protein\_coding"; old "TCONS\_01123985";  
protein\_coding"; old "TCONS\_01123985";  
protein\_coding"; old "TCONS\_01123985";

protein\_coding"; old "TCONS\_01123985";  
protein\_coding"; old "TCONS\_01123859";  
protein\_coding"; old "TCONS\_01123859";  
protein\_coding"; old "TCONS\_01123859";  
protein\_coding"; old "TCONS\_01123859";  
protein\_coding"; old "TCONS\_01123695";  
protein\_coding"; old "TCONS\_01123506";  
protein\_coding"; old "TCONS\_01125250";  
protein\_coding"; old "TCONS\_01125250";  
protein\_coding"; old "TCONS\_01124769";  
protein\_coding"; old "TCONS\_01125567";  
protein\_coding"; old "TCONS\_01125566";  
protein\_coding"; old "TCONS\_01125668";  
protein\_coding"; old "TCONS\_01125668";

protein\_coding"; old "TCONS\_01125668";  
protein\_coding"; old "TCONS\_01125668";  
protein\_coding"; old "TCONS\_01125668";  
protein\_coding"; old "TCONS\_01125668";  
protein\_coding"; old "TCONS\_01125668";  
protein\_coding"; old "TCONS\_01125668";  
protein\_coding"; old "TCONS\_01125668";  
protein\_coding"; old "TCONS\_01125587";  
protein\_coding"; old "TCONS\_01125587";  
protein\_coding"; old "TCONS\_01125587";  
protein\_coding"; old "TCONS\_01125480";  
protein\_coding"; old "TCONS\_01125480";  
protein\_coding"; old "TCONS\_01125480";  
protein\_coding"; old "TCONS\_01125604";  
protein\_coding"; old "TCONS\_01125604";  
protein\_coding"; old "TCONS\_01125604";  
protein\_coding"; old "TCONS\_01125604";  
protein\_coding"; old "TCONS\_01125486";  
protein\_coding"; old "TCONS\_01125498";  
protein\_coding"; old "TCONS\_01125498";  
protein\_coding"; old "TCONS\_01125498";  
protein\_coding"; old "TCONS\_01125517";  
protein\_coding"; old "TCONS\_01125517";  
protein\_coding"; old "TCONS\_01125525";  
protein\_coding"; old "TCONS\_01125525";  
protein\_coding"; old "TCONS\_01125525";  
protein\_coding"; old "TCONS\_01125525";  
protein\_coding"; old "TCONS\_01125533";  
protein\_coding"; old "TCONS\_01125533";  
protein\_coding"; old "TCONS\_01125535";

protein\_coding"; old "TCONS\_01125535";  
protein\_coding"; old "TCONS\_01125749";  
protein\_coding"; old "TCONS\_01125539";  
protein\_coding"; old "TCONS\_01125539";  
protein\_coding"; old "TCONS\_01125539";  
protein\_coding"; old "TCONS\_01125539";  
protein\_coding"; old "TCONS\_01125907";  
protein\_coding"; old "TCONS\_01125659";  
protein\_coding"; old "TCONS\_01125659";  
protein\_coding"; old "TCONS\_01126686";  
protein\_coding"; old "TCONS\_01126686";  
protein\_coding"; old "TCONS\_01126336";  
protein\_coding"; old "TCONS\_01126336";  
protein\_coding"; old "TCONS\_01127756";  
protein\_coding"; old "TCONS\_01128027";  
protein\_coding"; old "TCONS\_01128027";  
protein\_coding"; old "TCONS\_01128027";  
protein\_coding"; old "TCONS\_01128063";  
protein\_coding"; old "TCONS\_01128063";  
protein\_coding"; old "TCONS\_01128063";  
protein\_coding"; old "TCONS\_01128064";  
protein\_coding"; old "TCONS\_01128064";  
protein\_coding"; old "TCONS\_01128320";  
protein\_coding"; old "TCONS\_01128320";  
protein\_coding"; old "TCONS\_01128320";  
protein\_coding"; old "TCONS\_01129830";



protein\_coding"; old "TCONS\_01131239";  
protein\_coding"; old "TCONS\_01131365";  
protein\_coding"; old "TCONS\_01131365";  
protein\_coding"; old "TCONS\_01132470";  
"protein\_coding"; old "TCONS\_01132470";  
protein\_coding"; old "TCONS\_01132297";  
protein\_coding"; old "TCONS\_01132297";  
protein\_coding"; old "TCONS\_01132297";  
protein\_coding"; old "TCONS\_01131938";  
protein\_coding"; old "TCONS\_01131938";  
protein\_coding"; old "TCONS\_01131938";  
protein\_coding"; old "TCONS\_01132385";  
protein\_coding"; old "TCONS\_01132567";  
protein\_coding"; old "TCONS\_01132567";  
protein\_coding"; old "TCONS\_01132567";  
protein\_coding"; old "TCONS\_01132567";  
protein\_coding"; old "TCONS\_01132567";



protein\_coding"; old "TCONS\_01132167";  
protein\_coding"; old "TCONS\_01132049";  
protein\_coding"; old "TCONS\_01132049";  
protein\_coding"; old "TCONS\_01133475";  
protein\_coding"; old "TCONS\_01133475";
