# Supplementary material for: Genome-Wide Analysis of Long Noncoding RNAs and Their Responses to Drought Stress in Cotton (Gossypium hirsutum L.)
Source: PubMed Central journal article supplement (PMC4905672; doi:10.1371/journal.pone.0156723), 2016-06-13
Supplement: pone.0156723.s005.pdf [file pone.0156723.s005.pdf]

S3 Table Precursors prediction of small RNA molecules

| LncRNA_IL source | start | end  | strand | E_value  | Rfam_accessio | Rfam-id     |
|------------------|-------|------|--------|----------|---------------|-------------|
| TCONS_009Rfam    | 2     | 216  | +      | 1.31E-16 | RF01848       | ACEA_U3     |
| TCONS_007Rfam    | 191   | 443  | +      | 1.02E-19 | RF01845       | enod40      |
| TCONS_00CRfam    | 16    | 301  | +      | 3.31E-13 | RF00028       | Intron_gpI  |
| TCONS_002Rfam    | 183   | 261  | +      | 1.42E-09 | RF00029       | Intron_gpII |
| TCONS_01CRfam    | 7     | 69   | +      | 6.95E-09 | RF00029       | Intron_gpII |
| TCONS_003Rfam    | 2490  | 2566 | +      | 1.10E-06 | RF00029       | Intron_gpII |
| TCONS_003Rfam    | 417   | 493  | +      | 1.77E-15 | RF01419       | IsrR        |
| TCONS_003Rfam    | 286   | 367  | +      | 1.47E-19 | RF00073       | mir-156     |
| TCONS_003Rfam    | 285   | 366  | +      | 1.47E-19 | RF00073       | mir-156     |
| TCONS_001Rfam    | 551   | 633  | +      | 1.58E-19 | RF00073       | mir-156     |
| TCONS_001Rfam    | 534   | 616  | +      | 1.58E-19 | RF00073       | mir-156     |
| TCONS_004Rfam    | 296   | 380  | +      | 5.16E-17 | RF00073       | mir-156     |
| TCONS_005Rfam    | 270   | 354  | +      | 5.16E-17 | RF00073       | mir-156     |
| TCONS_004Rfam    | 296   | 380  | -      | 6.99E-14 | RF00073       | mir-156     |
| TCONS_005Rfam    | 270   | 354  | -      | 6.99E-14 | RF00073       | mir-156     |
| TCONS_001Rfam    | 551   | 633  | -      | 2.10E-10 | RF00073       | mir-156     |
| TCONS_001Rfam    | 534   | 616  | -      | 2.10E-10 | RF00073       | mir-156     |
| TCONS_003Rfam    | 286   | 367  | -      | 9.10E-09 | RF00073       | mir-156     |
| TCONS_003Rfam    | 285   | 366  | -      | 9.10E-09 | RF00073       | mir-156     |
| TCONS_003Rfam    | 1038  | 1238 | +      | 1.29E-40 | RF00638       | MIR159      |
| TCONS_005Rfam    | 973   | 1162 | +      | 5.69E-29 | RF00638       | MIR159      |
| TCONS_003Rfam    | 1036  | 1236 | -      | 1.65E-27 | RF00638       | MIR159      |
| TCONS_005Rfam    | 971   | 1160 | -      | 8.50E-13 | RF00638       | MIR159      |
| TCONS_009Rfam    | 65    | 153  | +      | 2.38E-18 | RF00640       | MIR167_1    |
| TCONS_009Rfam    | 99    | 205  | +      | 3.10E-18 | RF00640       | MIR167_1    |
| TCONS_00CRfam    | 106   | 212  | +      | 3.61E-18 | RF00640       | MIR167_1    |
| TCONS_00CRfam    | 110   | 216  | +      | 3.61E-18 | RF00640       | MIR167_1    |
| TCONS_00CRfam    | 100   | 206  | +      | 3.61E-18 | RF00640       | MIR167_1    |
| TCONS_00CRfam    | 107   | 213  | -      | 2.68E-16 | RF00640       | MIR167_1    |
| TCONS_00CRfam    | 111   | 217  | -      | 2.68E-16 | RF00640       | MIR167_1    |
| TCONS_00CRfam    | 101   | 207  | -      | 2.68E-16 | RF00640       | MIR167_1    |
| TCONS_009Rfam    | 100   | 206  | -      | 4.08E-15 | RF00640       | MIR167_1    |
| TCONS_009Rfam    | 66    | 154  | -      | 6.84E-14 | RF00640       | MIR167_1    |
| TCONS_005Rfam    | 102   | 334  | +      | 1.33E-13 | RF00640       | MIR167_1    |
| TCONS_005Rfam    | 103   | 335  | -      | 1.58E-08 | RF00640       | MIR167_1    |
| TCONS_01CRfam    | 99    | 263  | +      | 6.01E-35 | RF00677       | MIR168      |
| TCONS_01CRfam    | 98    | 262  | -      | 8.10E-16 | RF00677       | MIR168      |
| TCONS_009Rfam    | 197   | 291  | -      | 2.59E-18 | RF00645       | MIR169_2    |
| TCONS_009Rfam    | 199   | 293  | +      | 9.33E-13 | RF00645       | MIR169_2    |
| TCONS_009Rfam    | 191   | 299  | +      | 5.97E-14 | RF00865       | MIR169_5    |
| TCONS_009Rfam    | 192   | 300  | -      | 6.24E-06 | RF00865       | MIR169_5    |
| TCONS_002Rfam    | 813   | 910  | +      | 2.95E-24 | RF00452       | mir-172     |
| TCONS_002Rfam    | 325   | 422  | +      | 2.95E-24 | RF00452       | mir-172     |
| TCONS_009Rfam    | 807   | 904  | +      | 4.47E-23 | RF00452       | mir-172     |
| TCONS_002Rfam    | 22    | 186  | +      | 7.24E-23 | RF00452       | mir-172     |
| TCONS_005Rfam    | 200   | 365  | +      | 7.12E-22 | RF00452       | mir-172     |
| TCONS_002Rfam    | 813   | 910  | -      | 3.64E-20 | RF00452       | mir-172     |
| TCONS_002Rfam    | 325   | 422  | -      | 3.64E-20 | RF00452       | mir-172     |
| TCONS_01CRfam    | 50    | 157  | +      | 7.61E-19 | RF00452       | mir-172     |
| TCONS_009Rfam    | 807   | 904  | -      | 8.01E-19 | RF00452       | mir-172     |
| TCONS_002Rfam    | 22    | 186  | -      | 3.19E-18 | RF00452       | mir-172     |
| TCONS_005Rfam    | 200   | 365  | -      | 6.98E-17 | RF00452       | mir-172     |

|               |      |        |                  |           |
|---------------|------|--------|------------------|-----------|
| TCONS_01Crfam | 50   | 157 -  | 1.82E-15 RF00452 | mir-172   |
| TCONS_00Crfam | 1    | 120 +  | 8.20E-24 RF00689 | MIR390    |
| TCONS_00Crfam | 1    | 120 -  | 1.11E-15 RF00689 | MIR390    |
| TCONS_00Erfam | 114  | 223 +  | 8.68E-23 RF00688 | MIR394    |
| TCONS_00Erfam | 114  | 223 -  | 2.55E-15 RF00688 | MIR394    |
| TCONS_00Crfam | 97   | 223 +  | 2.11E-14 RF00451 | mir-395   |
| TCONS_00Crfam | 97   | 223 -  | 2.91E-10 RF00451 | mir-395   |
| TCONS_00Crfam | 52   | 188 +  | 4.26E-17 RF00445 | mir-399   |
| TCONS_00Erfam | 14   | 112 +  | 2.04E-15 RF00445 | mir-399   |
| TCONS_00Crfam | 23   | 118 +  | 1.53E-14 RF00445 | mir-399   |
| TCONS_00Crfam | 23   | 118 -  | 2.36E-13 RF00445 | mir-399   |
| TCONS_00Erfam | 15   | 112 -  | 2.49E-12 RF00445 | mir-399   |
| TCONS_00Crfam | 52   | 188 -  | 2.42E-11 RF00445 | mir-399   |
| TCONS_007Rfam | 235  | 338 +  | 1.54E-21 RF00842 | MIR403    |
| TCONS_007Rfam | 233  | 336 -  | 5.90E-19 RF00842 | MIR403    |
| TCONS_007Rfam | 1428 | 1527 + | 1.10E-22 RF00714 | MIR535    |
| TCONS_01Crfam | 1221 | 1320 + | 8.42E-21 RF00714 | MIR535    |
| TCONS_01Crfam | 1190 | 1289 + | 8.42E-21 RF00714 | MIR535    |
| TCONS_01Crfam | 1292 | 1391 + | 8.42E-21 RF00714 | MIR535    |
| TCONS_01Crfam | 1200 | 1299 + | 8.42E-21 RF00714 | MIR535    |
| TCONS_01Crfam | 1219 | 1318 - | 2.65E-18 RF00714 | MIR535    |
| TCONS_01Crfam | 1188 | 1287 - | 2.65E-18 RF00714 | MIR535    |
| TCONS_01Crfam | 1290 | 1389 - | 2.65E-18 RF00714 | MIR535    |
| TCONS_01Crfam | 1198 | 1297 - | 2.65E-18 RF00714 | MIR535    |
| TCONS_007Rfam | 1426 | 1525 - | 4.50E-17 RF00714 | MIR535    |
| TCONS_00Erfam | 1    | 304 +  | 7.66E-38 RF01855 | Plant_SRP |
| TCONS_00Erfam | 1    | 303 +  | 1.09E-37 RF01855 | Plant_SRP |
| TCONS_01Crfam | 1    | 307 +  | 1.78E-37 RF01855 | Plant_SRP |
| TCONS_00Erfam | 2    | 307 +  | 3.44E-37 RF01855 | Plant_SRP |
| TCONS_01Crfam | 1    | 309 +  | 8.46E-36 RF01855 | Plant_SRP |
| TCONS_01Crfam | 1    | 303 +  | 1.19E-34 RF01855 | Plant_SRP |
| TCONS_007Rfam | 2    | 309 +  | 2.79E-34 RF01855 | Plant_SRP |
| TCONS_01Crfam | 1    | 300 +  | 2.35E-33 RF01855 | Plant_SRP |
| TCONS_004Rfam | 740  | 1049 + | 1.23E-32 RF01855 | Plant_SRP |
| TCONS_004Rfam | 2    | 301 +  | 1.76E-30 RF01855 | Plant_SRP |
| TCONS_00Erfam | 1    | 300 +  | 7.24E-28 RF01855 | Plant_SRP |
| TCONS_00Erfam | 1    | 259 +  | 1.73E-22 RF01855 | Plant_SRP |
| TCONS_01Crfam | 1    | 273 +  | 1.39E-21 RF01855 | Plant_SRP |
| TCONS_00Crfam | 2    | 216 +  | 4.46E-55 RF01847 | Plant_U3  |
| TCONS_00Crfam | 1    | 218 +  | 2.36E-54 RF01847 | Plant_U3  |
| TCONS_00Crfam | 24   | 238 +  | 2.33E-47 RF01847 | Plant_U3  |
| TCONS_00Crfam | 1    | 211 +  | 1.24E-39 RF01847 | Plant_U3  |
| TCONS_00Erfam | 28   | 214 +  | 3.61E-32 RF01847 | Plant_U3  |
| TCONS_00Crfam | 1    | 203 +  | 7.29E-30 RF01847 | Plant_U3  |
| TCONS_00Erfam | 24   | 211 +  | 2.93E-29 RF01847 | Plant_U3  |
| TCONS_00Erfam | 15   | 200 +  | 7.61E-27 RF01847 | Plant_U3  |
| TCONS_00Crfam | 28   | 208 +  | 5.66E-26 RF01847 | Plant_U3  |
| TCONS_001Rfam | 80   | 321 +  | 2.09E-10 RF00030 | RNase_MRP |
| TCONS_004Rfam | 2405 | 2509 + | 4.35E-18 RF01213 | snoR103   |
| TCONS_004Rfam | 322  | 428 +  | 1.30E-16 RF01213 | snoR103   |
| TCONS_004Rfam | 322  | 428 +  | 1.30E-16 RF01213 | snoR103   |
| TCONS_001Rfam | 283  | 384 +  | 1.32E-20 RF01420 | snoR113   |
| TCONS_00Crfam | 162  | 263 +  | 2.78E-19 RF01420 | snoR113   |
| TCONS_00Crfam | 428  | 573 +  | 5.28E-36 RF01292 | snoR2     |

|               |       |         |                  |                 |
|---------------|-------|---------|------------------|-----------------|
| TCONS_009Rfam | 437   | 582 +   | 5.28E-36 RF01292 | snoR2           |
| TCONS_004Rfam | 428   | 573 +   | 7.68E-36 RF01292 | snoR2           |
| TCONS_003Rfam | 300   | 390 +   | 9.50E-14 RF01193 | snoR20a         |
| TCONS_008Rfam | 306   | 398 +   | 8.33E-13 RF01193 | snoR20a         |
| TCONS_003Rfam | 135   | 227 +   | 8.44E-13 RF01193 | snoR20a         |
| TCONS_001Rfam | 449   | 541 +   | 8.44E-13 RF01193 | snoR20a         |
| TCONS_002Rfam | 104   | 204 +   | 9.88E-13 RF00353 | snoR31_Z110_Z27 |
| TCONS_004Rfam | 106   | 197 +   | 2.66E-17 RF00356 | snoR32_R81      |
| TCONS_011Rfam | 295   | 375 -   | 1.77E-21 RF01281 | snoR35          |
| TCONS_011Rfam | 277   | 357 -   | 1.77E-21 RF01281 | snoR35          |
| TCONS_011Rfam | 295   | 375 -   | 1.77E-21 RF01281 | snoR35          |
| TCONS_011Rfam | 295   | 375 -   | 1.77E-21 RF01281 | snoR35          |
| TCONS_007Rfam | 571   | 668 +   | 9.09E-22 RF00267 | snoR64          |
| TCONS_003Rfam | 165   | 242 +   | 5.15E-11 RF01163 | snoR64a         |
| TCONS_001Rfam | 311   | 391 +   | 6.21E-11 RF01163 | snoR64a         |
| TCONS_008Rfam | 168   | 248 +   | 6.62E-11 RF01163 | snoR64a         |
| TCONS_003Rfam | 2     | 77 +    | 2.40E-09 RF01163 | snoR64a         |
| TCONS_01CRfam | 1352  | 1458 -  | 4.72E-14 RF00097 | snoR71          |
| TCONS_003Rfam | 10013 | 10119 + | 2.12E-13 RF00097 | snoR71          |
| TCONS_005Rfam | 3407  | 3513 -  | 1.96E-12 RF00097 | snoR71          |
| TCONS_002Rfam | 4315  | 4421 -  | 4.18E-12 RF00097 | snoR71          |
| TCONS_002Rfam | 4070  | 4176 -  | 4.18E-12 RF00097 | snoR71          |
| TCONS_004Rfam | 1044  | 1150 -  | 4.61E-11 RF00097 | snoR71          |
| TCONS_004Rfam | 1186  | 1292 -  | 4.61E-11 RF00097 | snoR71          |
| TCONS_005Rfam | 1202  | 1308 -  | 4.28E-10 RF00097 | snoR71          |
| TCONS_007Rfam | 4164  | 4270 -  | 6.43E-10 RF00097 | snoR71          |
| TCONS_004Rfam | 594   | 686 +   | 2.84E-17 RF01178 | snoR77Y         |
| TCONS_009Rfam | 594   | 686 +   | 3.47E-14 RF01178 | snoR77Y         |
| TCONS_009Rfam | 603   | 695 +   | 3.47E-14 RF01178 | snoR77Y         |
| TCONS_007Rfam | 257   | 334 +   | 1.33E-11 RF00093 | SNORD18         |
| TCONS_007Rfam | 259   | 335 +   | 3.16E-07 RF01159 | snoU18          |
| TCONS_009Rfam | 155   | 302 +   | 8.65E-22 RF01236 | snoU19          |
| TCONS_00CRfam | 162   | 309 +   | 3.80E-21 RF01236 | snoU19          |
| TCONS_004Rfam | 176   | 240 +   | 1.14E-17 RF01300 | snoU49          |
| TCONS_009Rfam | 198   | 262 +   | 1.06E-15 RF01300 | snoU49          |
| TCONS_009Rfam | 207   | 271 +   | 1.06E-15 RF01300 | snoU49          |
| TCONS_004Rfam | 2     | 57 +    | 3.94E-10 RF01300 | snoU49          |
| TCONS_009Rfam | 197   | 404 +   | 4.97E-15 RF00337 | snoZ112         |
| TCONS_009Rfam | 206   | 413 +   | 4.97E-15 RF00337 | snoZ112         |
| TCONS_004Rfam | 179   | 388 +   | 7.22E-12 RF00337 | snoZ112         |
| TCONS_004Rfam | 761   | 846 +   | 2.28E-12 RF00343 | snoZ122         |
| TCONS_004Rfam | 764   | 849 +   | 2.17E-11 RF00343 | snoZ122         |
| TCONS_007Rfam | 722   | 814 +   | 2.41E-10 RF00343 | snoZ122         |
| TCONS_003Rfam | 763   | 853 +   | 1.25E-08 RF00343 | snoZ122         |
| TCONS_007Rfam | 97    | 179 +   | 2.41E-17 RF00200 | snoZ199         |
| TCONS_001Rfam | 420   | 535 +   | 3.21E-15 RF00332 | snoZ266         |
| TCONS_001Rfam | 1919  | 1992 +  | 2.90E-12 RF00005 | tRNA            |
| TCONS_003Rfam | 451   | 522 +   | 2.90E-12 RF00005 | tRNA            |
| TCONS_00CRfam | 177   | 250 -   | 3.66E-12 RF00005 | tRNA            |
| TCONS_00CRfam | 154   | 226 -   | 4.40E-12 RF00005 | tRNA            |
| TCONS_01CRfam | 3     | 76 -    | 4.55E-12 RF00005 | tRNA            |
| TCONS_003Rfam | 2717  | 2788 +  | 6.33E-12 RF00005 | tRNA            |
| TCONS_00CRfam | 56    | 127 +   | 7.04E-12 RF00005 | tRNA            |
| TCONS_009Rfam | 44    | 115 -   | 1.53E-11 RF00005 | tRNA            |

|               |      |        |                  |        |
|---------------|------|--------|------------------|--------|
| TCONS_001Rfam | 36   | 109 +  | 2.51E-11 RF00005 | tRNA   |
| TCONS_007Rfam | 136  | 208 +  | 2.69E-11 RF00005 | tRNA   |
| TCONS_005Rfam | 2672 | 2743 - | 4.16E-11 RF00005 | tRNA   |
| TCONS_005Rfam | 1610 | 1681 - | 4.16E-11 RF00005 | tRNA   |
| TCONS_00CRfam | 275  | 348 +  | 9.89E-11 RF00005 | tRNA   |
| TCONS_005Rfam | 518  | 589 -  | 4.27E-09 RF00005 | tRNA   |
| TCONS_005Rfam | 553  | 624 -  | 4.27E-09 RF00005 | tRNA   |
| TCONS_005Rfam | 3255 | 3324 - | 2.16E-08 RF00005 | tRNA   |
| TCONS_005Rfam | 2588 | 2659 - | 4.69E-08 RF00005 | tRNA   |
| TCONS_007Rfam | 38   | 123 -  | 1.19E-06 RF00005 | tRNA   |
| TCONS_009Rfam | 2346 | 2412 - | 3.20E-06 RF00005 | tRNA   |
| TCONS_006Rfam | 2    | 141 +  | 8.11E-20 RF00003 | U1     |
| TCONS_00CRfam | 2    | 193 +  | 5.53E-50 RF00004 | U2     |
| TCONS_01CRfam | 1    | 184 +  | 6.74E-44 RF00004 | U2     |
| TCONS_006Rfam | 1    | 186 +  | 1.09E-43 RF00004 | U2     |
| TCONS_004Rfam | 1    | 184 +  | 1.34E-43 RF00004 | U2     |
| TCONS_011Rfam | 1    | 185 +  | 1.08E-41 RF00004 | U2     |
| TCONS_006Rfam | 1    | 185 +  | 3.71E-41 RF00004 | U2     |
| TCONS_006Rfam | 3    | 177 +  | 5.94E-36 RF00004 | U2     |
| TCONS_009Rfam | 2    | 215 +  | 1.00E-16 RF00012 | U3     |
| TCONS_007Rfam | 1    | 136 +  | 1.92E-18 RF00015 | U4     |
| TCONS_008Rfam | 1    | 135 +  | 6.33E-18 RF00015 | U4     |
| TCONS_008Rfam | 1    | 135 +  | 6.33E-18 RF00015 | U4     |
| TCONS_008Rfam | 1    | 135 +  | 6.33E-18 RF00015 | U4     |
| TCONS_01CRfam | 1466 | 1582 - | 3.00E-19 RF00020 | U5     |
| TCONS_01CRfam | 122  | 213 +  | 6.35E-18 RF00020 | U5     |
| TCONS_007Rfam | 442  | 531 +  | 1.85E-12 RF00206 | U54    |
| TCONS_007Rfam | 25   | 127 +  | 4.61E-31 RF00026 | U6     |
| TCONS_00CRfam | 2    | 94 +   | 2.83E-27 RF00026 | U6     |
| TCONS_00CRfam | 1    | 83 +   | 4.20E-26 RF00026 | U6     |
| TCONS_009Rfam | 4    | 96 +   | 4.07E-25 RF00026 | U6     |
| TCONS_00CRfam | 1    | 73 +   | 4.40E-21 RF00026 | U6     |
| TCONS_01CRfam | 1    | 78 +   | 1.55E-20 RF00026 | U6     |
| TCONS_00CRfam | 623  | 732 -  | 1.03E-15 RF00026 | U6     |
| TCONS_00CRfam | 853  | 962 -  | 1.03E-15 RF00026 | U6     |
| TCONS_011Rfam | 1    | 106 +  | 1.04E-13 RF00619 | U6atac |
